# Supplementary material for: Proteomic Landscape and Deduced Functions of the Cardiac 14-3-3 Protein Interactome
Source: Cells. 2022 Nov 4;11(21):3496. doi: 10.3390/cells11213496 (PMC9654263; doi:10.3390/cells11213496)
Supplement: Supplementary file 1 [file cells-11-03496-s001.zip]

Archive with 17 entries (17 files):
- Supplementary_Figures.pdf
- supplementary_TableS1-public_proteome_GSE62689_TPM.xlsx
- supplementary_TableS10-predicted_binding_sites.csv
- supplementary_TableS11-STRING.xlsx
- supplementary_TableS12-clusterProfiler.xlsx
- supplementary_TableS13-REVIGO.xlsx
- supplementary_TableS14-IPA.xlsx
- supplementary_TableS15-related_to_cellular_metabolism.xlsx
- supplementary_TableS16-software.xlsx
- supplementary_TableS2-public_proteome_SILAC.xlsx
- Supplementary_TableS3-protein_pools.xlsx
- supplementary_TableS4-brief_overview_of_protein_and_peptide_totals.xlsx
- supplementary_TableS5-proteins_in_mouse_cardiac_1433_interactome.xlsx
- supplementary_TableS6-statistics.xlsx
- supplementary_TableS7-overlap_of countdata_QSPEC.xlsx
- supplementary_TableS8-recorded_in_ANIA.xlsx
- supplementary_TableS9-BioPlex_and_our_cardiac_1433_interactome.xlsx
