# Supplementary material for: Proteomic Landscape and Deduced Functions of the Cardiac 14-3-3 Protein Interactome
Source: Cells. 2022 Nov 4;11(21):3496. doi: 10.3390/cells11213496 (PMC9654263; doi:10.3390/cells11213496)
Supplement: Supplementary file 1 [file cells-11-03496-s001.zip › supplementary_TableS1-public_proteome_GSE62689_TPM.xlsx]

## Sheet: Partek_GSE62689_Normalization_N
Supplementary Table S1. TPM values of public transcriptome processed in Partek Flow software.
Chromosome	Start	Stop	Strand	Gene Symbol	GSM1531480	GSM1531481	GSM1531478	GSM1531479	averageTPM
7	45567794	45575328	-	0610005C13Rik	0.146348	0.148906	0.134394	0.151262	0.145228
11	51685386	51688875	-	0610009B22Rik	1.26584	1.17302	1.33783	1.56881	1.33638
2	26445696	26459391	+	0610009E02Rik	0.0331436	0.0399986	0.0692275	0.0536385	0.049002
11	120348678	120351191	+	0610009L18Rik	0.759058	0.899313	1.17667	1.07638	0.977855
11	23564961	23633640	-	0610010F05Rik	0.0294081	0.031288	0.0230019	0.0152718	0.0247424
11	70235206	70237915	-	0610010K14Rik	4.0963	4.00177	3.86302	5.13531	4.2741
17	87362239	87364463	-	0610012D04Rik	0.075679	0.0166586	0.0364266	0.148928	0.0694231
16	31947050	31948495	-	0610012G03Rik	19.2964	19.5884	19.7626	22.2339	20.2203
4	98321398	98331792	+	0610025J13Rik	0.0215907	0.024951	0.0311767	0.0265551	0.0260684
6	72347317	72353149	+	0610030E20Rik	1.57235	1.37762	1.38992	1.59122	1.48278
8	77517056	77523899	+	0610038B21Rik	0.132352	0.197895	0.121008	0.187626	0.15972
2	163644850	163645802	+	0610039K10Rik	0.890198	0.59679	1.48308	0.990587	0.990164
5	143329247	143332705	+	0610040B10Rik	0.194691	0.24642	0.281132	0.191565	0.228452
5	63812363	63899626	+	0610040J01Rik	0.0135014	0.0127369	0.0143898	0.0101216	0.0126874
5	109995511	109996399	-	1010001B22Rik	0.276725	0.166886	0.182461	0.559487	0.29639
3	138065052	138081507	+	1110002E22Rik	5.99345	5.24428	5.69837	7.25325	6.04734
12	3403878	3427012	-	1110002L01Rik	0.0885686	0.135352	0.0974512	0.134073	0.113861
5	65405751	65406518	+	1110003F10Rik	0.365732	0.434731	0.105623	0.143944	0.262508
7	116039397	116105211	+	1110004F10Rik	0.252028	0.258766	0.26944	0.384341	0.291144
5	115631049	115631817	-	1110006O24Rik	0.0730512	0.289443	0.263713	0.287514	0.22843
2	32377097	32381939	-	1110008P14Rik	3.30908	2.95875	3.45211	4.2737	3.49841
X	70385877	70389418	+	1110012L19Rik	1.07739	0.931188	0.810532	1.46542	1.07113
15	100613173	100613844	-	1110013H19Rik	0.418058	0.993856	0.84514	1.56312	0.955044
4	41505009	41517334	-	1110017D15Rik	0.00910399	0.00601197	0.0164326	0.00895784	0.0101266
2	167188702	167192809	+	1110018N20Rik	0.178532	0.320328	0.29792	0.47059	0.316843
6	13871526	14044386	+	1110019D14Rik	0.00194736	0.00257194	0.00210897	0.00319349	0.00245544
17	84917182	84957711	-	1110020A21Rik	0.0138428	0.0146261	0.0139922	0.00953438	0.0129989
15	81584174	81585029	-	1110025M09Rik	0.393708	0.563314	0.189503	0.193694	0.335055
9	50762828	50775521	-	1110032A03Rik	0.302492	0.365469	0.333078	0.294742	0.323945
3	68869586	68872164	+	1110032F04Rik	0.0652871	0.0287422	0.047137	0.085652	0.0567046
7	29155680	29156921	+	1110035H17Rik	1.32449e-18	0.315312	0.0992406	0.229086	0.16091
17	34950238	34952472	-	1110038B12Rik	0.581722	0.461105	0.828651	0.551012	0.605622
15	76948506	76950980	+	1110038F14Rik	2.15433	2.62067	2.50504	3.48085	2.69022
13	33935567	33960182	+	1110046J04Rik	0.0075662	0.0129824	0.0190796	0.0227728	0.0156002
2	91275068	91444705	-	1110051M20Rik	0.0613851	0.0645745	0.0670308	0.103405	0.0740988
19	21581202	21652977	-	1110059E24Rik	0.025013	0.0216795	0.0256424	0.0304997	0.0257086
9	122945089	122951001	-	1110059G10Rik	0.588364	0.457469	0.411093	0.550906	0.501958
4	124849080	124851197	-	1110065P20Rik	1.52027	1.65413	1.9778	2.97559	2.03195
8	120608602	120647633	-	1190005I06Rik	0.0100613	0.0113906	0.0064041	0.0135298	0.0103465
10	82619851	82623229	-	1190007I07Rik	0.911769	0.840392	0.731586	0.990352	0.868525
16	21794318	21809041	+	1300002E11Rik	0.164309	0.121389	0.153309	0.218101	0.164277
4	155732545	155734728	-	1500002C15Rik	0.101143	0.281943	0.271105	0.567997	0.305547
7	132874739	132931198	-	1500002F19Rik	0.0231492	0.0107774	0.0156368	0.0178844	0.016862
3	88782943	88832548	-	1500004A13Rik	0.227483	0.215784	0.218425	0.37864	0.260083
3	127714634	127717028	-	1500005C15Rik	0.023435	0.046427	0.0507599	0.0691763	0.0474496
10	83722865	83762763	+	1500009L16Rik	0.0100595	0.022941	0.0227702	0.0174095	0.0182951
5	114808196	114823469	-	1500011B03Rik	0.040407	0.0751988	0.0740072	0.12289	0.0781257
18	61726390	61735918	+	1500015A07Rik	0.209945	0.224535	0.264727	0.261239	0.240111
10	89686371	89700867	+	1500026H17Rik	0.0154811	0.0383369	0.0195602	0.0304651	0.0259608
17	14943184	14959571	+	1600012H06Rik	0.266295	0.354894	0.347899	0.463333	0.358105
7	38183217	38197569	+	1600014C10Rik	1.96566	2.02848	2.02026	3.014	2.2571
6	86526247	86582467	+	1600020E01Rik	0.013971	0.019775	0.0223354	0.0284828	0.021141
14	66295334	66297130	-	1700001G11Rik	0.125333	0.186444	0.113129	0.184946	0.152463
5	146182441	146185305	-	1700001J03Rik	0.0783566	0.038808	0.0424299	0.0385494	0.049536
12	110667688	110682620	-	1700001K19Rik	0.0450871	0.0322551	0.0298399	0.0887266	0.0489772
19	53248736	53265406	-	1700001K23Rik	0.00673106	0.0111124	0.00728969	0.0165575	0.0104227
15	83353847	83367283	-	1700001L05Rik	0.0334048	0.0137871	0.0211033	0.0328685	0.0252909
6	83156404	83162946	+	1700003E16Rik	0.154366	0.147244	0.148602	0.219393	0.167401
3	8462228	8463036	-	1700003N22Rik	0.816112	0.97675	1.60044	2.52717	1.48012
16	31376506	31379134	-	1700007E05Rik	0.0640449	0.0435029	0.0616535	0.0630168	0.0580545
11	59725917	59740155	-	1700007J10Rik	0.0167875	0.00274411	0.0261759	0.0247073	0.0176037
16	33379854	33380728	-	1700007L15Rik	0.256766	0.423899	0.185384	0.694771	0.390205
5	121835195	121835829	+	1700008B11Rik	0.530946	0.350619	0.511121	0.522423	0.478777
7	127510438	127512870	-	1700008J07Rik	0.343066	0.360132	0.175913	0.391399	0.317628
7	111083064	111122685	-	1700012D14Rik	0.036816	0.0261822	0.0347598	0.0585173	0.0390688
8	120536892	120537727	-	1700016A09Rik	0	0.151753	0.0970212	0.311573	0.140087
9	57253117	57262613	-	1700017B05Rik	1.28797	1.14314	1.36927	1.72073	1.38028
6	126822377	126825178	+	1700018A23Rik	1.37027	1.92206	2.07353	2.99708	2.09074
19	29046245	29048730	+	1700018L02Rik	0.26101	0.295051	0.382178	0.426488	0.341182
1	52922324	53020180	-	1700019D03Rik	0.00630658	0.0083293	0.0053812	0.0050771	0.00627355
19	5502767	5503788	-	1700020D05Rik	0.604443	0.32658	0.436406	0.59474	0.490542
11	83437677	83441234	+	1700020L24Rik	0.0437987	0.0521004	0.0844558	0.213414	0.0984422
4	117002166	117003013	-	1700021J08Rik	0.910382	1.09179	0.699902	1.47619	1.04457
4	42969604	42983641	+	1700022I11Rik	0.0522695	0.0671301	0.0616967	0.0840274	0.0662809
17	25985808	25991031	+	1700022N22Rik	0.110032	0.0770076	0.117684	0.208385	0.128277
17	29093416	29094462	-	1700023B13Rik	0.140019	0.0943476	0.177808	0.410167	0.205585
1	151852403	152090126	-	1700025G04Rik	0.129263	0.120015	0.109091	0.186468	0.136209
7	28492550	28497714	+	1700028B04Rik	0.0869146	0.021909	0.0793995	0.0106899	0.0497282
5	151368675	151432119	+	1700028E10Rik	0.00884297	0.0058396	0.00574613	0.00870101	0.00728243
7	44229811	44246696	-	1700028J19Rik	0.00332267	0.0263302	0.0143937	0.019616	0.0159156
2	92382538	92385709	+	1700029I15Rik	0.062493	0.175254	0.154139	0.281602	0.168372
8	45953606	45975441	-	1700029J07Rik	0.0334025	0.0322384	0.0259716	0.0379226	0.0323838
12	20804381	20815780	-	1700030C10Rik	0.00535562	0.0206137	0.0299692	0.0489485	0.0262218
8	116969594	116978960	-	1700030J22Rik	0.0359406	0.0316453	0.0172993	0.00589395	0.0226948
8	72443880	72461002	+	1700030K09Rik	0.278212	0.275742	0.30811	0.401713	0.315944
1	191886130	191907528	-	1700034H15Rik	0.00858717	0.0198735	0.0114931	0.00859468	0.0121371
3	40900196	40902544	-	1700034I23Rik	0.0590561	0.272991	0.25583	0.174324	0.19055
1	9747648	9791925	+	1700034P13Rik	0.038244	0.0408511	0.0377743	0.0572542	0.0435309
16	3895179	3908690	-	1700037C18Rik	0.124135	0.156939	0.12601	0.143076	0.13754
2	131146324	131160082	-	1700037H04Rik	0.685082	0.562813	0.612395	0.958964	0.704813
11	58322988	58324440	+	1700047K16Rik	0.0882115	0.272831	0.124755	0.299087	0.196221
1	182287990	182303326	+	1700047M11Rik	0.0146331	0.0144948	0.0132063	0.0215973	0.0159829
9	121937223	121947017	+	1700048O20Rik	0	0.0151294	0.0124075	0.027102	0.0136597
11	105177726	105181434	-	1700052K11Rik	0.51023	0.381478	0.535278	0.544331	0.492829
4	45011687	45015407	+	1700055D18Rik	0.0466373	0.029878	0.121114	0.114604	0.0780583
1	184033030	184034302	-	1700056E22Rik	0.220532	0.233011	0.382136	0.477382	0.328265
16	17047520	17049112	+	1700056N10Rik	0.246686	0.186175	0.356212	0.277401	0.266618
7	19258492	19259740	+	1700058P15Rik	0.179818	0.148432	0.292113	0.221165	0.210382
4	53562983	53564698	-	1700060J05Rik	0.0477531	0.116648	0.0376394	0.263195	0.116309
9	110986201	110987805	+	1700061E17Rik	0.371294	3.42134e-12	0.254414	5.94043e-13	0.156427
18	69943320	69969610	-	1700061H18Rik	0.00213402	0.00312599	0.0055432	0.00960635	0.00510239
1	39839175	39847335	-	1700066B17Rik	0.034377	0.0136209	0.00992803	0.0270602	0.0212465
18	35703225	35730870	+	1700066B19Rik	0.00202942	0.00804785	0.0087914	0.00998421	0.00721322
1	57377620	57385424	+	1700066M21Rik	0.0143781	0.0284844	0.0467142	0.0495155	0.034773
8	84001502	84004771	+	1700067K01Rik	0.0514867	0.0453334	0.0371732	0.151981	0.0714936
11	81572655	81573474	-	1700071K01Rik	0.277311	0.18221	0.249285	0.135852	0.211164
17	43588340	43592443	-	1700071M16Rik	0.0136737	0.0189508	0.03558	0.0591739	0.0318446
12	54862647	54863668	+	1700081N11Rik	1.80578	2.06654	2.64307	1.55627	2.01791
9	21091755	21128394	+	1700084C06Rik	0.0040801	0.0100291	0.00822135	0.0116722	0.00850069
2	30236795	30238224	-	1700084E18Rik	0.361752	0.602391	0.865986	0.826593	0.66418
15	33403985	33405977	-	1700084J12Rik	0.172237	0.0926687	0.0863337	0.333951	0.171298
11	65151910	65159892	-	1700086D15Rik	0.0140575	0.0232077	0.0152241	0.0138318	0.0165803
18	38238405	38250566	-	1700086O06Rik	0.0443591	0.0501979	0.090484	0.0531525	0.0595484
14	103424905	103449868	+	1700087I21Rik	0.0112373	0.0118732	0.00649062	0.0154797	0.0112702
15	79129349	79141254	-	1700088E04Rik	0.170959	0.288904	0.240126	0.328816	0.257201
3	90062796	90068348	+	1700094D03Rik	0.0593254	0.0712572	0.079393	0.0920716	0.0755118
10	76389015	76401508	+	1700094J05Rik	0.0304597	0.024892	0.0246941	0.0362942	0.029085
5	112793292	112801702	+	1700095B10Rik	0.276073	0.227345	0.271038	0.437698	0.303038
5	25530013	25531467	+	1700096K18Rik	0.385855	0.764417	0.863616	0.87322	0.721777
13	102760255	102761897	+	1700099I09Rik	0.0748041	0.0734253	0.0792567	0.0740952	0.0753953
6	129531950	129533818	-	1700101I11Rik	0.348902	0.134505	0.194023	0.61991	0.324335
9	108392805	108410935	+	1700102P08Rik	0.00928351	0.012261	0.0134053	0.018269	0.0133047
19	7382537	7383562	+	1700105P06Rik	0.126477	0.126008	0.0481015	0.450146	0.187683
14	76672963	76687170	+	1700108F19Rik	0.00789799	0.00521556	0.00855347	0.0116568	0.00833096
5	3571566	3584357	+	1700109H08Rik	0.293873	0.194063	0.224842	0.228735	0.235378
15	77084398	77096315	+	1700109K24Rik	0.028247	0.0124356	0.0237933	0.0185291	0.0207512
3	88171556	88177786	-	1700113A16Rik	0.0540383	0.0373706	0.0733415	0.0599554	0.0561764
13	91861432	91862045	+	1700119I11Rik	0.104163	0.910272	0.7644	0.450267	0.557276
15	99249511	99262045	+	1700120C14Rik	0.083692	0.167691	0.156288	0.151428	0.139775
14	67324894	67335929	-	1700120O09Rik	0.0101683	0.00671477	0.0220243	0.010005	0.0122281
4	11966565	11994281	+	1700123M08Rik	0.0263149	0.0387651	0.036537	0.0677187	0.0423339
14	54686216	54690742	+	1700123O20Rik	0.924468	0.9374	0.866639	1.16159	0.972524
6	143201397	143221449	-	1700126G02Rik	0.0095353	0.0169731	0.0129964	0.00345437	0.0107398
1	98131456	98144656	+	1810006J02Rik	0.00850051	0.00561345	0.00306866	0.0209101	0.00952318
8	124305132	124306508	-	1810008B01Rik	0.38182	0.218807	0.374461	0.807526	0.445653
19	8888853	8890882	+	1810009A15Rik	3.03499	2.72485	2.73932	4.35084	3.2125
11	107025681	107030444	+	1810010H24Rik	0.082453	0.10112	0.0765394	0.197028	0.114285
2	26138546	26139544	+	1810012K08Rik	1.2036	0.980668	1.73654	1.74261	1.41585
16	8830100	8858923	+	1810013L24Rik	0.813628	0.86121	0.913478	1.03997	0.907072
10	86685525	86694807	+	1810014B01Rik	0.452406	0.462249	0.500157	0.600215	0.503757
8	106135400	106138526	+	1810019D21Rik	0.0359126	0.0948144	0.0259158	0.141274	0.0744792
15	89071196	89075853	-	1810021B22Rik	0.144565	0.103421	0.226147	0.272638	0.186693
2	127186355	127208281	-	1810024B03Rik	0.0332639	0.0371738	0.0277112	0.0226591	0.030202
7	73539801	73558396	-	1810026B05Rik	0.0866463	0.085671	0.15231	0.122607	0.111809
X	12654879	12673669	-	1810030O07Rik	0.426971	0.406176	0.398812	0.564072	0.449008
13	64248700	64271853	+	1810034E14Rik	0.213238	0.233625	0.183698	0.398171	0.257183
3	122924203	122926185	+	1810037I17Rik	4.96785	5.23548	4.93795	6.86344	5.50118
6	91440987	91441756	+	1810044D09Rik	1.1673	1.92711	1.68557	1.86641	1.6616
19	3708293	3717882	+	1810055G02Rik	0.602633	0.637506	0.53648	0.857775	0.658599
6	35252654	35263497	+	1810058I24Rik	4.82229	4.81776	5.26739	5.59517	5.12565
5	148953748	148970123	-	1810059H22Rik	0.0955738	0.122589	0.125894	0.102518	0.111644
14	20546079	20570688	+	1810062O18Rik	0.0264653	0.0305306	0.0254986	0.0807413	0.0408089
17	83917937	83921607	+	1810073O08Rik	0.137583	0.0504751	0.0772601	0.225624	0.122736
11	57795499	57801418	-	2010001A14Rik	0.113742	0.0938894	0.0684345	0.139895	0.10399
13	46979908	47011196	+	2010001K21Rik	0.0885869	0.0604322	0.0664637	0.136245	0.0879319
9	51278513	51284211	+	2010007H06Rik	0.108308	0.237565	0.269526	0.300331	0.228933
3	106481982	106485914	-	2010016I18Rik	0.142684	0.0471118	0.0618103	0.126354	0.09449
17	86285164	86287179	-	2010106C02Rik	0.167057	0.202251	0	0.219167	0.147119
1	37611677	37720086	-	2010300C02Rik	0.00362261	0.00615149	0.00560466	0.00356445	0.0047358
6	42370671	42381216	+	2010310C07Rik	0.0159611	0.0210804	0.00384129	0.0209399	0.0154557
9	124291804	124312697	-	2010315B03Rik	0.0483349	0.0444917	0.0552499	0.0660541	0.0535327
8	70776815	70777824	+	2010320M18Rik	6.22753	5.17728	5.78089	8.53481	6.43013
7	29246561	29248467	-	2200002D01Rik	0.396189	0.518235	0.424715	0.719912	0.514763
13	58379817	58385226	-	2210016F16Rik	1.98109	1.83566	1.63254	2.41875	1.96701
5	114942158	114949784	+	2210016L21Rik	1.47873	1.38945	1.31197	1.90374	1.52097
7	121062852	121063960	-	2210406H18Rik	0.202539	0.100312	0.146232	0.199288	0.162093
6	31220351	31337405	+	2210408F21Rik	0.0743804	0.0656175	0.0841112	0.0877512	0.0779651
13	77135540	77613785	+	2210408I21Rik	0.00222891	0.00123949	0.00160926	0.00253941	0.00190427
1	180952064	180958150	-	2210411M09Rik	0.0569528	0.0797262	0.0584046	0.077975	0.0682646
5	130131327	130131825	+	2210412B16Rik	0.563287	0.14879	0.569367	0.221698	0.375785
2	176226569	176240329	+	2210418O10Rik	0.00291808	0.0166824	0.0225496	0.00284249	0.0112481
9	63394447	63399247	-	2300009A05Rik	0.724668	0.679227	1.14277	0.996943	0.885902
6	129208412	129238726	-	2310001H17Rik	0.0148059	0.0244433	0.0213796	0.0327785	0.0233518
2	163471957	163473006	+	2310001K24Rik	1.57435	2.0045	2.35878	3.42285	2.34012
7	43695209	43797959	-	2310002F09Rik	0.00126045	0.000953882	0.000788445	0.00314645	0.00153731
4	73939371	73950847	-	2310002L09Rik	0.791978	0.82969	0.857706	1.05826	0.884408
1	138851983	138856853	-	2310009B15Rik	0.262241	0.315714	0.388218	0.449963	0.354034
7	90124822	90129985	-	2310010J17Rik	0.108664	0.0717582	0.101992	0.10692	0.0973335
10	80318254	80320538	-	2310011J03Rik	5.42856	5.38537	5.19631	7.08161	5.77296
7	112612560	112680082	-	2310014F06Rik	0.00249267	0.00823037	0.0113981	0.0130808	0.00880049
12	80120546	80132845	-	2310015A10Rik	0.501778	0.602467	0.563183	0.991934	0.66484
17	31907879	31909030	-	2310015A16Rik	0.633661	0.611578	0.703847	1.00717	0.739064
16	13514131	13521108	-	2310015D24Rik	0.0562883	0.0637215	0.0812798	0.15033	0.0879049
1	80225044	80228793	+	2310015K22Rik	0.0748244	0.0691761	0.0324137	0.0883479	0.0661905
7	44668233	44678236	+	2310016G11Rik	0.222183	0.165356	0.117834	0.223659	0.182258
13	99076526	99087922	-	2310020H05Rik	0.0344615	0.00975309	0.0177722	0.0145321	0.0191297
7	27553233	27582100	+	2310022A10Rik	1.40516	1.59017	1.72034	2.08633	1.7005
8	124635756	124663370	-	2310022B05Rik	1.33279	1.288	1.47275	1.59927	1.4232
9	50739691	50746537	-	2310030G06Rik	0.286827	0.259763	0.218921	0.330603	0.274029
11	59208321	59210739	+	2310033P09Rik	2.78429	2.74265	3.03211	3.76693	3.08149
19	46348201	46350303	-	2310034G01Rik	0.0533809	0.176255	0.096352	0	0.081497
17	46772635	46773397	+	2310039H08Rik	3.46044	4.08411	3.98685	5.14356	4.16874
10	95336276	95366203	+	2310039L15Rik	0.0768616	0.0792301	0.0744428	0.112519	0.0857634
5	76928372	76947759	+	2310040G07Rik	0.240191	0.217855	0.198489	0.270504	0.23176
6	86483376	86488228	-	2310040G24Rik	0.86722	0.878114	0.918322	1.28564	0.987324
16	93792136	93794902	-	2310043M15Rik	0.286474	0.125039	0.200192	0.246844	0.214637
5	149231332	149237985	+	2310047D07Rik	0.0337312	0.0158725	0.0456454	0.0232922	0.0296353
7	131338220	131362760	-	2310057M21Rik	0.192041	0.16456	0.204678	0.254193	0.203868
11	58965748	58978051	-	2310058D17Rik	0.0524535	0.0322566	0.0230468	0.0358954	0.0359131
17	35892677	35897432	-	2310061I04Rik	12.4006	12.0223	12.0437	14.1634	12.6575
15	99972158	99973288	-	2310068J16Rik	0.390687	0.372124	0.386207	1.00694	0.53899
6	82877864	82881854	-	2310069B03Rik	0.014061	0.0557124	0.0507599	0.124517	0.0612626
7	44246722	44252320	+	2410002F23Rik	2.14428	2.33156	2.43986	3.17469	2.5226
3	145938014	145944830	+	2410004B18Rik	0.749033	0.804462	0.849826	1.49831	0.975408
12	17003319	17011728	-	2410004P03Rik	0.0133436	0.0220292	0.00481703	0.0262589	0.0166122
11	62602877	62604808	+	2410006H16Rik	0.813513	0.556403	0.922983	1.00057	0.823367
12	22953997	23010285	-	2410018L13Rik	0.00310097	0.00177185	0.00357075	1.53328e-13	0.00211089
14	56811989	56813900	+	2410022M11Rik	0.46973	0.426516	0.466321	0.953265	0.578958
19	23134900	23135718	+	2410080I02Rik	0.205758	0.317043	0.0990376	0	0.15546
5	118245227	118266094	+	2410131K14Rik	0.879177	0.859303	0.993803	1.30151	1.00845
17	36977701	36981238	-	2410137M14Rik	0.0317237	0.0523731	0.0229044	0.0156072	0.0306521
8	57488054	57508878	+	2500002B13Rik	0.0673542	0.0604906	0.0622457	0.0583202	0.0621027
2	153341157	153346074	-	2500004C02Rik	0.136921	0.0979527	0.110771	0.123611	0.117314
16	18836578	18840161	+	2510002D24Rik	2.47099	2.37382	2.70677	3.71964	2.8178
16	21649045	21694666	-	2510009E07Rik	0.379999	0.316718	0.318752	0.486432	0.375475
5	120552055	120553040	-	2510016D11Rik	0.398704	0.526581	0.411232	0.728564	0.51627
5	3585112	3586375	+	2510017J16Rik	0.133262	0.117336	0.192429	0	0.110757
4	147940895	147947315	+	2510039O18Rik	5.02483	5.15335	5.82989	7.36896	5.84426
7	126648543	126649595	-	2510046G10Rik	0.404357	0.619609	0.490613	0.42318	0.48444
2	29868723	29870318	-	2600006K01Rik	0.204144	0.0484599	0.0791787	0.210757	0.135635
6	13867735	13871519	-	2610001J05Rik	1.88296	1.83089	1.8412	2.36333	1.97959
X	107782751	107816335	-	2610002M06Rik	0.0701626	0.0849438	0.0615122	0.0969795	0.0783995
8	20385782	20424815	-	2610005L07Rik	0.785234	0.665602	0.609067	0.903979	0.740971
10	79064374	79097601	-	2610008E11Rik	0.118194	0.115962	0.10606	0.139556	0.119943
5	131996179	131998414	-	2610011E03Rik	0.0753065	0.14919	0.0362473	0.0246992	0.0713607
1	135480392	135481415	-	2610012C04Rik	0.164526	0.144863	0.237574	0.32377	0.217683
16	11203366	11246202	+	2610020C07Rik	0.00787634	0.0121086	0.00189675	0.0103282	0.00805247
7	41599230	41628534	+	2610021A01Rik	0.0485536	0.0240177	0.0359093	0.0455082	0.0384972
11	85791661	85832224	-	2610027K06Rik	0.0145743	0.00583684	0.00774915	0.0143243	0.0106211
9	45797348	45799061	-	2610028D06Rik	0.262012	0.151396	0.165525	0.45116	0.257523
10	76449081	76461111	+	2610028H24Rik	0.00702031	0.0342206	0.0353544	0.0622702	0.0347164
11	113043895	113201839	-	2610035D17Rik	0.0216678	0.0295557	0.0271848	0.0195724	0.0244952
15	96134819	96284496	-	2610037D02Rik	0.0104952	0.0126238	0.00974251	0.0103267	0.0107971
8	129216354	129234407	-	2610044O15Rik8	0.124586	0.119552	0.140216	0.204466	0.147205
1	9560832	9631176	-	2610203C22Rik	0.0415883	0.0492547	0.0311407	0.059293	0.0453192
4	10874498	10899426	+	2610301B20Rik	0.0900246	0.0559027	0.0400561	0.0792523	0.0663089
6	86848399	86849441	-	2610306M01Rik	2.42289	3.19999	3.07102	3.28461	2.99463
7	128538932	128539544	+	2610306O10Rik	2.01679	3.7533	4.30215	3.42762	3.37497
13	28460034	28885621	-	2610307P16Rik	0.000922781	0.00147991	0.000666243	0.00155651	0.00115636
11	78261752	78290624	+	2610507B11Rik	10.7632	12.2702	12.2016	15.3781	12.6533
11	59199836	59202386	-	2610507I01Rik	0.110007	0.0581157	0.0476545	0.129889	0.0864166
2	116066218	116067445	-	2700033N17Rik	0.411516	0.392529	0.231088	0.62986	0.416248
5	23850597	23855039	+	2700038G22Rik	0.0126302	0.159774	0.200617	0.256986	0.157502
19	32389216	32391191	+	2700046G09Rik	0.766982	0.581524	0.553758	0.447212	0.587369
12	71136848	71243304	+	2700049A03Rik	0.0326746	0.0299297	0.0296789	0.0440767	0.03409
17	13482553	13668892	-	2700054A10Rik	0.0033119	0.0026023	0.00260774	0.00503623	0.00338954
18	24470850	24477799	+	2700062C07Rik	0.355238	0.291858	0.311096	0.371262	0.332363
1	181950132	181953376	-	2700078F05Rik	0.069178	0.102786	0.0374596	0.0510506	0.0651185
19	7417625	7425905	+	2700081O15Rik	2.12082	2.17013	2.46071	3.20683	2.48962
12	55045661	55080111	-	2700097O09Rik	0.0879414	0.0911477	0.0924636	0.123385	0.0987344
11	64079484	64083260	+	2810001G20Rik	0.326873	0.255103	0.27891	0.394723	0.313902
2	94406151	94411683	+	2810002D19Rik	0.222801	0.159398	0.119738	0.125753	0.156922
8	124836945	124863121	-	2810004N23Rik	1.49198	1.50301	1.44957	1.89127	1.58396
5	124328089	124341845	+	2810006K23Rik	0.459331	0.419244	0.443632	0.555885	0.469523
8	123042466	123044603	+	2810013P06Rik	1.28641	1.09222	1.3837	1.73074	1.37327
11	58867216	58883289	+	2810021J22Rik	0.0924636	0.153263	0.0794827	0.177619	0.125707
1	157412352	157420237	+	2810025M15Rik	1.3906	2.00301	1.78693	2.37134	1.88797
12	111572317	111574403	-	2810029C07Rik	0.161371	0.142085	0.116509	0.158781	0.144686
15	75642129	75653644	+	2810039B14Rik	0.0779551	0.0762685	0.0773895	0.122978	0.0886478
14	20641009	20644049	+	2810402E24Rik	0.609017	0.572793	0.519654	0.59924	0.575176
X	108833800	108974907	+	2810403D21Rik	0.00238998	0.00236302	0.00086376	0.00273848	0.00208881
4	137387266	137388383	-	2810405F17Rik	0.502268	0.298513	0.362635	0.543626	0.42676
16	87784075	87839294	+	2810407A14Rik	0.00101602	0.00603848	0.00220068	0.00299911	0.00306357
11	69897352	69900988	-	2810408A11Rik	0.10801	0.122273	0.144825	0.197369	0.143119
11	120185400	120189853	-	2810410L24Rik	0.529158	0.474237	0.5094	0.582647	0.523861
1	151748949	151755019	-	2810414N06Rik	0.10167	0.128175	0.100098	0.154604	0.121137
2	27882925	27887053	-	2810430I11Rik	0.0954804	0.0811236	0.0788456	0.0940256	0.0873688
6	134897961	134901109	+	2810454H06Rik	0.106931	0.176535	0.154408	0.145496	0.145842
8	123838553	123840786	-	2810455O05Rik	0.251247	0.298646	0.253958	0.074164	0.219504
14	46883698	46885065	-	2810457G06Rik	0.395888	0.210611	0.218365	0.214532	0.259849
5	25100983	25110110	+	2900005J15Rik	0.0676166	0.0527702	0.0621331	0.084676	0.066799
1	127753616	127774093	-	2900009J06Rik	0.00273982	0.012665	0.00593442	0.0134792	0.00870461
11	18888261	18889841	-	2900018N21Rik	0.0710169	0.0468971	0.0769108	0.279507	0.118583
5	113086323	113221237	-	2900026A02Rik	0.471568	0.49046	0.514913	0.670211	0.536788
11	117611247	117613858	+	2900041M22Rik	0.0429746	0.127705	0.0775687	0.0211424	0.0673477
11	120229802	120231586	-	2900052L18Rik	1.47806	0.809922	0.703866	1.98037	1.24305
12	24796664	24831203	-	2900060N12Rik	0.0227409	0.00643598	0.0129005	0.0111879	0.0133163
7	81523550	81531499	+	2900076A07Rik	1.39041	1.45883	1.5695	1.87505	1.57345
5	144241690	144256187	-	2900089D17Rik	0.0619364	0.0613664	0.0671219	0.0990545	0.0723698
2	163419795	163420362	+	2900093K20Rik	0.692634	1.76423	1.35736	1.84983	1.41601
2	156388065	156392980	-	2900097C17Rik	26.7457	24.7092	24.3157	36.1443	27.9787
9	109827943	109832707	-	3000002C10Rik	0.320166	0.384179	0.307507	0.302003	0.328464
6	148944867	148947130	+	3010003L21Rik	0.160016	0.082314	0.0382652	0.0487872	0.0823456
16	13671929	13678389	+	3110001I22Rik	0.125104	0.0262055	0.0517721	0.0394393	0.0606302
1	120121187	120188190	+	3110009E18Rik	0.00418663	0.00221177	0.00665	0.00576719	0.0047039
7	81782182	81789479	-	3110040N11Rik	0.753478	0.731125	0.777154	0.960771	0.805632
12	20874125	20921263	-	3110053B16Rik	0.00119019	0.00708778	0.00719493	0.00267759	0.00453762
12	70991615	71015833	-	3110056K07Rik	0.0579149	0.0871987	0.0535223	0.0774999	0.0690339
X	150463726	150466157	+	3110067C02Rik	0.046967	0.0154209	0.0336486	0.114773	0.0527024
13	119487252	119488385	-	3110070M22Rik	0.399005	0.296226	0.12176	0.165419	0.245602
3	51829385	51830406	-	3110080O07Rik	0.219798	0.0362867	0.277713	0.162202	0.174
5	139359739	139460528	-	3110082I17Rik	0.0317286	0.0276327	0.0333571	0.050495	0.0358033
12	88365314	88377324	-	3200001D21Rik	0.00996232	0.0132604	0.0134909	0.00991134	0.0116562
18	37655451	37661743	+	3222401L13Rik	0.508247	0.347405	0.399141	0.535182	0.447494
2	150310935	150362766	-	3300002I08Rik	0.00896411	0.00182986	0.00234453	0.00333155	0.00411751
14	32659119	32685294	-	3425401B19Rik	6.5995	6.48832	6.45161	8.46335	7.0007
14	12284173	12303232	+	3830406C13Rik	0.114277	0.0991388	0.059526	0.108944	0.0954714
13	107022553	107055498	+	3830408C21Rik	0.0255441	0.0281141	0.0172132	0.0301608	0.0252581
19	28893042	28967801	-	4430402I18Rik	0.0450883	0.057369	0.0611469	0.0401119	0.050929
2	93027956	93044733	+	4631405J19Rik	0.33775	0.331246	0.289728	0.447491	0.351554
3	89767511	89773241	-	4632404H12Rik	0.744128	0.685369	0.77054	0.741817	0.735464
3	102134615	102137497	+	4632404M16Rik	1.55734	1.49121	1.64443	3.29454	1.99688
3	19894886	19901034	+	4632415L05Rik	1.15893	1.03047	1.07393	1.46357	1.18172
9	122127294	122130015	+	4632418H02Rik	1.2165	1.22543	1.2207	0.791219	1.11346
7	92734166	92741469	-	4632427E13Rik	0.161327	0.299312	0.227408	0.498888	0.296734
16	30008667	30021431	+	4632428C04Rik	0.448334	0.327993	0.406206	0.579533	0.440516
3	121787500	121788573	-	4633401B06Rik	0.941156	0.690564	0.755012	0.720259	0.776748
3	89337850	89347832	+	4731419I09Rik	0.30198	0.315762	0.395048	0.330492	0.335821
6	148212253	148215732	+	4732416N19Rik	0.0163411	0.0644654	0.0353237	0.0317348	0.0369662
1	6209866	6215294	-	4732440D04Rik	0.314394	0.318676	0.26659	0.480367	0.345007
12	84039469	84053808	-	4732463B04Rik	0.0376043	0.0158581	0.0235828	0.00626073	0.0208265
7	25376819	25566418	+	4732471J01Rik	0.0178377	0.0118215	0.00849097	0.013041	0.0127978
12	86290761	86306007	-	4732487G21Rik	0.037909	0.0617003	0.0434767	0.0341986	0.0443211
17	12318853	12327251	+	4732491K20Rik	0.307108	0.343601	0.321434	0.598305	0.392612
7	116546865	116549365	+	4732496C06Rik	0.0448827	0.059278	0.0324051	0.176649	0.0783037
8	91449521	91474599	-	4831440D22Rik	0.0182085	0.0161527	0.0145209	0.0144963	0.0158446
6	48755338	48756369	+	4833403J16Rik	0.255954	0.500198	0.275448	0.707745	0.434836
19	3999548	4000543	-	4833408A19Rik	0.95855	1.07981	1.18059	1.1096	1.08214
8	10899922	10903894	+	4833411C07Rik	0.155372	0.102602	0.0815838	0.0972857	0.109211
15	77113732	77115803	-	4833412C15Rik	0.18963	0.0357786	0.0586765	0.159931	0.111004
5	3629777	3631723	-	4833413G10Rik	0.818246	0.649663	0.543789	0.684274	0.673993
11	95858865	95861045	+	4833417C18Rik	0.097053	0.0640905	0.100973	0.126612	0.0971821
17	87274886	87282815	-	4833418N02Rik	0.0353786	0.0841061	0.0715209	0.125318	0.0790809
18	4353558	4368921	+	4833419F23Rik	0.0255628	0.0241156	0.0105465	0.0179661	0.0195477
13	119462768	119486121	+	4833420G17Rik	0.24932	0.340649	0.302611	0.169723	0.265576
13	91701665	91741873	-	4833422C13Rik	0.0467431	0.0314583	0.0560205	0.0664737	0.0501739
17	35772450	35780688	+	4833427F10Rik	0.0340516	0.0539676	0.0442531	0.020103	0.0380938
19	46303591	46305612	-	4833438C02Rik	0.427664	0.568267	0.710034	0.785141	0.622776
13	54551218	54565436	-	4833439L19Rik	3.81899	3.90588	3.97483	4.88007	4.14494
9	108567533	108569175	+	4833445I07Rik	0.102503	0.118975	0.0986757	0.302573	0.155682
5	19202368	19226556	-	4921504A21Rik	0.0598972	0.0543409	0.0341284	0.0565279	0.0512236
6	50573302	50596633	-	4921507P07Rik	0.0240467	0.0111157	0.010417	0.0141964	0.0149439
3	79212919	79253914	+	4921511C10Rik	0.00684271	0.00632617	0.0049404	0.0161589	0.00856705
10	120765732	120778887	+	4921513I03Rik	0.00426479	0.0281632	0.0246333	0.0293743	0.0216089
4	141115660	141118088	+	4921514A10Rik	0.466833	0.704506	0.49577	1.01195	0.669765
16	57331951	57335433	+	4921517D16Rik	0.0322248	0.0425603	0.0581654	0.110976	0.0609816
8	85408759	85432834	-	4921524J17Rik	0.183102	0.207385	0.253656	0.277659	0.230451
2	179975993	179979014	+	4921531C22Rik	0.33428	0.380176	0.402248	0.657828	0.443633
11	3886088	3895099	-	4921536K21Rik	0.0249044	0.0452265	0.0719234	0.104144	0.0615496
2	130706200	130906407	-	4930402H24Rik	0.327305	0.30145	0.28583	0.394016	0.32715
1	36332708	36333421	+	4930403P22Rik	0.472118	0.311771	0.227245	0.232269	0.310851
16	91011249	91016744	+	4930404I05Rik	0.0306314	0.0232867	0.0662313	0.0202057	0.0350888
10	81363067	81365817	-	4930404N11Rik	0.160673	0.118879	0.367449	0.328205	0.243802
2	156714540	156720910	-	4930405A21Rik	0.0792669	0.0116323	0.0381536	0.0606623	0.0474288
17	63305446	63312974	-	4930405O22Rik	0.00745262	0.0344502	0.021523	0.0366649	0.0250227
4	9770585	9823412	+	4930412C18Rik	0.0169923	0.0189357	0.0115016	0.00940474	0.0142086
8	57650889	57652360	-	4930412F12Rik	0.228837	0.0599214	0.137683	0.0512902	0.119433
11	60112219	60115231	-	4930412M03Rik	0.223519	0.196806	0.201725	0.311569	0.233405
7	122969058	122970051	-	4930413G21Rik	0.169497	0.410409	0.530295	0.667102	0.444326
15	98571004	98589581	+	4930415O20Rik	0.0211403	0.0199433	0.0130827	0.0208009	0.0187418
2	122702047	122721457	+	4930417H01Rik	0.00777918	0.00527531	0.00682538	0.0226907	0.0106426
12	76402751	76403983	-	4930426I24Rik	0.182154	0.120288	0.164393	0.492881	0.239929
9	79793641	79803236	+	4930429F24Rik	0.111096	0.0695026	0.054881	0.0632861	0.0746914
7	73310380	73315194	+	4930429H19Rik	0.104888	0.0384802	0.0504857	0.0573356	0.0627974
9	107351276	107353987	-	4930429P21Rik	1.0383e-39	0.0819948	0.029883	0.11351	0.0563469
10	100572265	100590424	-	4930430F08Rik	0.0774991	0.0581691	0.0602275	0.0798124	0.068927
7	109752320	109755279	+	4930431P19Rik	0.0613319	0.133864	0.16427	0.264476	0.155985
10	11244790	11281222	-	4930432B10Rik	0.00153995	0.00610157	0.00444734	0.013637	0.00643146
8	84148025	84172591	+	4930432K21Rik	0.0296891	0.0392114	0.0395731	0.0494366	0.0394776
1	37329667	37334173	-	4930439A04Rik	0.0249016	0.0164442	0.0359577	0.0367528	0.0285141
10	81182605	81183850	-	4930442H23Rik	0.156425	0.0616661	0.140217	0.198123	0.139108
2	85073614	85086462	-	4930443O20Rik	0.0131001	0.00865086	0.0126109	0.021483	0.0139612
1	54681729	54767525	+	4930444A19Rik	0.00377746	7.2221e-39	0.00208436	0.00303279	0.00222365
9	46326393	46329528	-	4930448E22Rik	0.0178958	0.0709067	0.0387621	0.0176085	0.0362933
13	55775136	55784506	-	4930451E10Rik	0.0179627	0.0118619	0.00432298	0.0235657	0.0144283
16	4964289	4978963	+	4930451G09Rik	0.0535264	0.035347	0.0607292	0.0752388	0.0562103
14	8431192	8666241	-	4930452B06Rik	0.00859276	0.00882679	0.00792725	0.0150308	0.0100944
16	64751751	64771162	-	4930453N24Rik	0.274525	0.329762	0.333753	0.334918	0.31824
10	21319088	21342058	-	4930455C13Rik	0.0643547	0.0735709	0.0502116	0.0695492	0.0644216
5	100840797	100847168	-	4930458D05Rik	0.435631	0.240392	0.274486	0.451569	0.350519
6	92012394	92016118	-	4930466I24Rik	0.0903921	0.14923	0.174034	0.237176	0.162708
10	53614369	53615275	+	4930466K18Rik	0.185773	0.122678	0.223545	0.304651	0.209162
13	21440471	21445935	+	4930470G03Rik	0.197182	0.0335679	0.0490681	0.117329	0.0992868
14	64099295	64104236	-	4930471C04Rik	0.0227093	0.00749823	0.016396	0.089379	0.0339956
2	130543791	130563750	-	4930473A02Rik	0.0153073	0.0126517	0.0116658	0.0166877	0.0140781
12	88434113	88442255	-	4930473H19Rik	0.0288197	0.0193115	0.0163052	0.036181	0.0251543
12	71317621	71321661	-	4930474H06Rik	1.89124e-05	0.0182845	0.000361488	0.152767	0.042858
17	14389113	14398943	-	4930474M22Rik	0.0171221	0.00753789	0.0164828	0.0112315	0.0130936
5	121503513	121504602	+	4930477O15Rik	0.206073	0.476292	0.0743919	0.40553	0.290572
6	137145876	137146930	-	4930480K02Rik	0.159687	0.316355	0.192155	0	0.167049
19	5406740	5422848	+	4930481A15Rik	1.05626	1.1337	1.22352	1.22686	1.16009
3	95015625	95020139	+	4930481B07Rik	0.186431	0.0738677	0.053841	0.134521	0.112165
16	18213649	18215251	+	4930483P17Rik	0.140083	0.138759	0.0505697	0.172293	0.125426
8	93750147	93813723	-	4930488L21Rik	0.00461604	0.00410118	0.00445993	0.000868295	0.00351136
10	124469074	124524489	+	4930503E24Rik	0.0542057	0.0507736	0.0560219	0.0527713	0.0534431
18	70452212	70472510	-	4930503L19Rik	0.0690996	0.0876116	0.0618631	0.0788688	0.0743608
19	45998137	46013387	+	4930505N22Rik	0.0478258	0.0343625	0.0402792	0.0549735	0.0443602
17	8293366	8311081	-	4930506C21Rik	0.030623	0.112515	0.0754359	0.148988	0.0918905
10	62449489	62451354	+	4930507D05Rik	0.0932841	0.101595	0.0448657	0	0.0599362
18	57373455	57552398	-	4930511M06Rik	0.000940579	0.000828168	0.00113182	0.00092548	0.000956512
8	95806744	95821729	+	4930513N10Rik	0.109236	0.0819372	0.105454	0.131493	0.10703
7	130653128	130654393	-	4930513N20Rik	0.177402	0.410026	0.480313	0.218193	0.321484
9	119440278	119444831	-	4930516B21Rik	0.135545	0.227842	0.213519	0.21824	0.198787
9	31278021	31280993	-	4930517E14Rik	0.0425276	0.070532	0.147321	0.0976147	0.0894988
6	91689933	91691609	-	4930517G19Rik	0.301271	0.840007	0.580043	0.559932	0.570313
2	156856616	156858213	-	4930518I15Rik	0.175652	0.463979	0.532645	0.380232	0.388127
10	28880921	28923508	-	4930519F09Rik	0.247667	0.280444	0.252804	0.327747	0.277166
5	139215469	139216357	-	4930520M14Rik	0.252718	0.0600167	0.18246	0.18533	0.170131
9	114368303	114377230	+	4930520O04Rik	0.144548	0.136956	0.136125	0.12986	0.136872
1	160044382	160080209	+	4930523C07Rik	0.393062	0.443268	0.441226	0.361843	0.40985
9	106891547	106895183	+	4930524O07Rik	0.0602645	0.0592884	0.0167794	0.00967969	0.036503
13	67796594	67830986	-	4930525G20Rik	0.00519275	0.00227434	0.00235557	0.00481531	0.00365949
17	28075050	28076678	-	4930526A20Rik	1.68801	2.11174	1.94427	1.99403	1.93451
3	90292301	90293984	-	4930537H20Rik	0.107161	0.0462239	0.0539149	0.279929	0.121807
3	135436209	135438666	-	4930539J05Rik	0.611928	0.362533	0.658625	0.364779	0.499466
15	58984136	58988906	+	4930544F09Rik	0.117617	0.0466022	0.084919	0.173593	0.105683
2	5037280	5041134	+	4930551O13Rik	0.0609147	0.0395642	0.0321415	0.148853	0.0703684
10	8860864	8861444	-	4930553I21Rik	0.48365	0.127754	0.279354	0.380708	0.317866
3	151294126	151296642	+	4930555A03Rik	0.0891945	0.058901	0.112697	0.153585	0.103594
15	41173487	41173869	+	4930555K19Rik	0.634816	0.407122	0.353406	0.148128	0.385868
12	99569740	99571415	+	4930556H04Rik	0.0669891	0.132712	0.0483658	0.0659137	0.0784951
15	10714836	10790124	+	4930556M19Rik	0.00521628	0.00590512	0.00645623	0.0109983	0.00714398
11	88851604	88881396	+	4930556N13Rik	0.0056495	0.00248716	0.00543856	0.00555881	0.00478351
5	113142449	113142830	+	4930557B06Rik	0.736264	0	0.212632	0.579556	0.382113
16	4835416	4867687	+	4930562C15Rik	0.0121695	0.0126286	0.0138071	0.017106	0.0139278
1	160074735	160077986	-	4930562F07Rik	0.189742	0.391444	0.333237	0.64798	0.390601
11	72215138	72218445	+	4930563E22Rik	0.0350311	0.0461266	0.0742279	0.051008	0.0515984
16	36880519	36897190	-	4930565N06Rik	0.010096	0.00444469	0.0145785	0.0099339	0.00976327
3	51276759	51278384	+	4930577N17Rik	0.28194	0.390639	0.608448	0.490089	0.442779
4	42735545	42846249	+	4930578G10Rik	0.00101357	0.00100399	0.000731819	0.00155679	0.00107654
15	98983348	98996447	+	4930578M01Rik	0.0256982	0.00848509	0.0123693	0.0126428	0.0147988
14	54650511	54654608	+	4930579G18Rik	0.125034	0.0740867	0.0802728	0.168415	0.111952
3	79629079	79632821	+	4930579G24Rik	0.149929	0.174325	0.108294	0.203569	0.159029
10	27389866	27397226	+	4930579H20Rik	0.0304909	0.025169	0.0165107	0.0300015	0.025543
13	38454149	38461806	-	4930579J19Rik	0.0146541	0.0145156	0.0317407	0.0288378	0.0224371
9	35116728	35130923	+	4930581F22Rik	0.218461	0.245594	0.238047	0.347816	0.262479
5	65493096	65494016	+	4930589O11Rik	0.196278	0.265637	0.136171	0.443474	0.26039
6	91902809	91950726	+	4930590J08Rik	0.00351253	0.00463911	0.00253603	0.00460819	0.00382396
14	122913030	122956344	+	4930594M22Rik	0.0136663	0.00925778	0.00445064	0.00433174	0.00792661
6	39118473	39148313	+	4930599N23Rik	0.0124918	0.00338753	0.00246577	0.0109119	0.00731425
19	26768801	26823908	-	4931403E22Rik	0.00305424	0.00470614	0.00220515	0.00300521	0.00324268
9	15283337	15306449	-	4931406C07Rik	0.13351	0.136828	0.149354	0.250481	0.167543
7	34236707	34313552	-	4931406P16Rik	0.537968	0.642532	0.706386	0.781959	0.667211
11	75589665	75594772	-	4931413K12Rik	0.19774	0.152345	0.190357	0.324277	0.21618
14	54583663	54605994	-	4931414P19Rik	0.198476	0.157612	0.177763	0.24473	0.194645
2	103966943	104028362	-	4931422A03Rik	0.0125839	0.0105774	0.0129416	0.0135094	0.0124031
8	105280409	105289865	-	4931428F04Rik	0.2221	0.263154	0.285679	0.388412	0.289836
7	128192050	128203329	-	4931431B13Rik	0.0547156	0.0328475	0.0393913	0.03426	0.0403036
5	35581227	35588764	-	4931431C16Rik	0.0109022	0.0281073	0.0318647	0.0439107	0.0286962
3	65507257	65529380	-	4931440P22Rik	0.0263586	0.0224296	0.0355366	0.023356	0.0269202
5	123138931	123141570	+	4932422M17Rik	1.4098	1.3934	1.28451	1.94898	1.50917
11	114413401	114448861	-	4932435O22Rik	0.00316432	0.00940323	0.0125654	0.0108973	0.00900756
3	36863104	37053034	+	4932438A13Rik	0.190208	0.182386	0.181066	0.20665	0.190078
5	57570082	57720202	-	4932441J04Rik	0.175468	0.145867	0.156252	0.237881	0.178867
10	118860826	118863543	+	4932442E05Rik	0.138724	0.176613	0.262178	0.189232	0.191687
8	4162522	4206883	-	4932443L11Rik	0.00296644	0.0135928	0.00967693	0.0113165	0.00938817
13	24905593	24914273	+	4932702P03Rik	0.400053	0.50773	0.535878	0.561608	0.501317
1	89650529	89683909	-	4933400F21Rik	0.0168075	0.00776936	0.00970794	0.021499	0.0139459
5	136919146	136937113	+	4933404O12Rik	0.0405935	0.0412409	0.0586167	0.0921735	0.0581562
12	32919384	32953790	-	4933406C10Rik	0.00652251	0.00107681	0.00235461	0.00481335	0.00369182
10	20310506	20312295	-	4933406P04Rik	0.188161	0.124255	0.11321	0.123427	0.137263
X	75706932	75764700	-	4933407K13Rik	0.0174813	0.0160334	0.0119202	0.0267566	0.0180479
19	42052248	42053628	+	4933411K16Rik	0.121964	0.0805407	0.0880573	0.0800039	0.0926415
10	116949757	116963280	+	4933412E12Rik	0.0539336	0.0575334	0.0629027	0.118382	0.0731879
14	26356574	26400457	+	4933413J09Rik	0.0115063	0.0101311	0.0212302	0.0226431	0.0163777
8	123235091	123242360	+	4933417D19Rik	0.0431638	0.0456322	0.0329702	0.07295	0.0486791
3	55847105	55848401	+	4933417G07Rik	0.136294	0.260276	0.318963	0.351635	0.266792
7	143322773	143364626	-	4933417O13Rik	0.0174263	0.012393	0.0135495	0.0171466	0.0151288
4	33027142	33031324	-	4933421O10Rik	0.375632	0.310068	0.358378	0.409202	0.36332
2	90479236	90488426	+	4933423P22Rik	0.103782	0.0846598	0.0572995	0.0480546	0.073449
18	14988995	15047988	+	4933424G05Rik	0	0.00125604	0.00274652	0.0056145	0.00240427
11	57655415	57657827	-	4933426K07Rik	0.0697803	0.092161	0.0503811	0.114433	0.0816889
11	72153929	72207460	-	4933427D14Rik	0.0487341	0.0541888	0.0414273	0.0551552	0.0498763
11	97490783	97500341	-	4933428G20Rik	0.0370427	0.0630338	0.0810727	0.0800222	0.0652928
3	30792570	30793565	-	4933429H19Rik	1.59905	1.28533	1.67907	1.82914	1.59815
7	25219368	25220931	+	4933430L12Rik	0.203455	0.0264133	0.21098	0.242751	0.1709
7	6136430	6137696	+	4933431C10Rik	0.841993	0.673081	0.671907	0.784873	0.742964
3	107888850	107896214	-	4933431E20Rik	0.349546	0.357045	0.275075	0.501495	0.37079
6	72120213	72123198	-	4933431G14Rik	0.0187951	0.0868815	0.0542799	0.0369867	0.0492358
9	85749078	85750430	+	4933431K14Rik	0.493865	0.661725	0.500904	0.998138	0.663658
8	77610860	77769683	+	4933431K23Rik	0.014401	0.0137865	0.0114712	0.0182012	0.014465
16	18207822	18213864	-	4933432I09Rik	0.185711	0.16556	0.134083	0.219276	0.176157
9	75410184	75417710	+	4933433G15Rik	0.0074546	0.00984553	0.026911	0.0220048	0.016554
13	66996819	67032409	-	4933433G19Rik	0.00801082	0.0159053	0.0106426	0.0126753	0.0118085
3	90051636	90066070	+	4933434E20Rik	1.52573	1.48201	1.46171	1.74726	1.55418
5	121847667	121848845	-	4933437G19Rik	0.0952519	0.125802	0.103157	0.187446	0.127914
11	59505662	59513648	+	4933439C10Rik	0.165003	0.182187	0.255827	0.319412	0.230607
1	172538133	172558130	-	4933439K11Rik	0.00841676	0.00926357	0.0141794	0.0055211	0.00934521
6	117905808	117907761	-	4933440N22Rik	0.264456	0.221847	0.388521	0.637759	0.378146
17	70745329	70755583	-	5031415H12Rik	0.0109427	0.0108393	0.0197515	0.0215341	0.0157669
5	23382308	23434270	-	5031425E22Rik	0.127404	0.15472	0.177734	0.216723	0.169145
2	166447451	166459233	+	5031425F14Rik	0.00476178	0.0125781	0.010314	0.0327974	0.0151128
6	112285593	112288838	-	5031434C07Rik	0.121024	0.0570859	0.162275	0.136093	0.119119
3	51560035	51567118	+	5031434O11Rik	0.150966	0.172778	0.177283	0.2887	0.197432
15	84943936	84988552	-	5031439G07Rik	0.86011	0.878557	0.907886	1.3078	0.988588
12	111941991	111944485	-	5033406O09Rik	0.067486	0.103986	0.0649661	0.243476	0.119979
1	92908378	92910765	-	5033417F24Rik	0.141022	0.124168	0.169696	0.161885	0.149193
12	8511201	8562682	+	5033421B08Rik	0.00217957	0.000719658	0.00314729	0.00321688	0.00231585
8	57332118	57354581	+	5033428I22Rik	0.105883	0.154926	0.145826	0.203006	0.15241
13	45965253	45966509	+	5033430I15Rik	0.848697	0.79643	1.09651	1.31854	1.01504
6	31108827	31110921	-	5330406M23Rik	1.58075	1.59235	1.9344	1.68719	1.69867
2	131820006	131847684	-	5330413P13Rik	0.004054	0.00267713	0.00439046	0.00797785	0.00477486
13	99502477	99504440	-	5330431K02Rik	0.114322	0.188735	0.185714	0.337459	0.206558
6	21681301	21685384	+	5330437M03Rik	0.0687036	0.0181478	0.0396829	0	0.0316336
10	116509052	116583516	+	5330438D12Rik	0.00377017	0.00453695	0.00271986	0.00891331	0.00498507
6	142614595	142626463	+	5330439B14Rik	0.564539	0.426363	0.523659	0.592519	0.52677
15	100459740	100468692	-	5330439K02Rik	0.0125343	0.0248316	0.0316739	0.0308326	0.0249681
6	50566643	50594866	+	5430402O13Rik	0.00198786	0.00262543	0.0057409	0.0136916	0.00601145
2	156844351	156862964	-	5430405H02Rik	0.151352	0.157529	0.109139	0.237548	0.163892
5	100420842	100429536	-	5430416N02Rik	0.0405442	0.0609473	0.0248144	0.0838623	0.0525421
8	27279441	27281071	+	5430430B14Rik	0.240935	0.272751	0.422459	0.338667	0.318703
7	44473538	44486139	+	5430431A17Rik	0.805865	0.590969	0.568973	0.779786	0.686398
6	83417440	83420993	-	5430434F05Rik	0.0646355	0.0866482	0.0476414	0.125143	0.081017
X	105037197	105079610	-	5530601H04Rik	0.0330697	0.020091	0.0171908	0.0403481	0.0276749
X	13042015	13045298	+	5730405O15Rik	0.136712	0.0789952	0.0987057	0.235406	0.137455
4	126609818	126614372	+	5730409E04Rik	2.82118	2.91249	2.53499	3.8426	3.02782
15	98872644	98874083	+	5730414N17Rik	0.272914	0.0772385	0.197043	0.153447	0.175161
X	109001485	109002297	+	5730416F02Rik	0.0705761	0.091253	0.1513	0.274188	0.146829
11	80360492	80378035	-	5730455P16Rik	0.748343	0.689261	0.775816	0.859052	0.768118
5	48327952	48414295	+	5730480H06Rik	0.00925418	0.0153712	0.0150123	0.0166229	0.0140651
2	38862163	38865534	+	5730507A11Rik	0.166429	0.0439617	0.0720968	0.0818788	0.0910916
15	76590120	76591728	+	5730521K06Rik	0.0439273	0.184322	0.146315	0.10299	0.119389
6	52177498	52180852	+	5730596B20Rik	0.0669092	0.0331384	0.0362311	0.0658351	0.0505285
8	25101216	25109987	+	5830408C22Rik	0.0717846	0.11251	0.0540832	0.114399	0.0881942
5	64044978	64050229	+	5830416I19Rik	0.0427373	0.0426744	0.0154281	0.0210256	0.0304664
3	88775216	88825588	+	5830417I10Rik	0.976778	0.988423	0.914091	1.3364	1.05392
7	135635931	135652315	-	5830432E09Rik	0.0278957	0.0299793	0.0342848	0.0899899	0.0455374
4	155398763	155421705	-	5830444B04Rik	0.0437019	0.0693689	0.0638001	0.048643	0.0563785
14	34672465	34673764	-	5830448L01Rik	0.215948	0.342252	0.34301	0.637445	0.384664
9	120577331	120578075	+	5830454E08Rik	0.527854	0.29878	0.435552	0.370986	0.408293
9	110372048	110375431	-	5830462I19Rik	0.559824	0.684863	0.528743	0.581455	0.588721
9	44179047	44180702	-	5830462O15Rik	0.0677986	0.0447719	0.0734254	0.166776	0.088193
5	123366472	123368920	+	5830487J09Rik	0.206262	0.181611	0.0827336	0.202951	0.168389
10	37139402	37151316	+	5930403N24Rik	0.0141271	0.00932904	0.0135996	0.0278006	0.0162141
5	30897300	30899581	+	5930420M18Rik	0.0983838	0.178666	0.0887908	0.145207	0.127762
5	148990056	148995224	-	5930430L01Rik	0.510228	0.724056	0.650548	1.07885	0.740921
1	132466433	132477065	-	6030442K20Rik	0.0217612	0.0413236	0.0354832	0.0510547	0.0374057
5	22550432	22807851	+	6030443J06Rik	0.0021887	0.00260266	0.0028492	0.00280517	0.00261143
4	136462250	136463978	+	6030445D17Rik	0.194803	0.107201	0.140647	0.223622	0.166568
15	12808177	12824650	-	6030458C11Rik	0.510867	0.557767	0.575395	0.760699	0.601182
14	20687236	20703029	-	6230400D17Rik	0.106568	0.10927	0.120575	0.0938809	0.107573
5	138995056	139000578	+	6330403L08Rik	3.25001	3.08018	3.3583	4.39684	3.52133
16	23127793	23128923	+	6330408M09Rik	0.397192	0.360651	0.466002	0.146556	0.3426
2	32732620	32741017	-	6330409D20Rik	0.106902	0.0970671	0.117977	0.0699085	0.0979636
3	129753758	129763885	+	6330410L21Rik	0.0609586	0.0684296	0.0467962	0.0635525	0.0599342
17	23550799	23565292	+	6330415G19Rik	0.0039501	0.00823603	0.0141487	0.003902	0.00755921
5	138264043	138266662	+	6330418K02Rik	0.192795	0.208252	0.23464	0.288411	0.231024
8	70766579	70768221	+	6330537M06Rik	0.491474	0.703485	0.540341	0.37532	0.527655
3	96606659	96629821	-	6330549D23Rik	0.107462	0.0850554	0.0897541	0.128574	0.102711
3	95307076	95315128	-	6330562C20Rik	0.100117	0.0460118	0.068389	0.0548462	0.067341
7	92639949	92643784	+	6430511E19Rik	0.146293	0.212535	0.158434	0.287889	0.201288
8	120114152	120165307	+	6430548M08Rik	0.297215	0.282456	0.291395	0.353953	0.306255
2	155973279	156007978	-	6430550D23Rik	0.0284518	0.0169889	0.0257442	0.0290645	0.0250623
13	99396924	99412877	-	6430562O15Rik	0.201768	0.162287	0.164783	0.253872	0.195678
9	107340602	107352423	+	6430571L13Rik	0.208827	0.275805	0.229585	0.637091	0.337827
3	79287173	79289849	+	6430573P05Rik	0.125792	0.110759	0.0605476	0.206288	0.125847
6	55396887	55412286	+	6430584L05Rik	0.00728662	0.0168414	0.0131523	0.0143393	0.0129049
3	40885897	40894194	-	6430590A07Rik	0.11092	0.117446	0.0824627	0.112091	0.10573
2	72745846	72813718	-	6430710C18Rik	0.00247982	0.00764207	0.00596805	0.0105734	0.00666584
8	25744390	25745581	-	6430710M23Rik	0.141318	0.155536	0.0340104	0.13905	0.117479
2	29245107	29253007	-	6530402F18Rik	0.615026	0.637017	0.668737	0.749808	0.667647
6	28215555	28260863	+	6530409C15Rik	0.00514035	0.00432264	0.00824178	5.66376e-22	0.00442619
13	48532905	48546501	-	6720427I07Rik	0.111414	0.0681243	0.0655443	0.0812043	0.0815717
1	160608955	160612451	-	6720464F23Rik	0.0481436	0.0317924	0.023173	0.063161	0.0415675
5	74367163	74369916	-	6720475M21Rik	0.061137	0.0807455	0.0147135	0.0200518	0.0441619
1	66793645	66796299	-	6820402A03Rik	0.0845567	0.0837575	0.0763119	0.124799	0.0923563
2	152415587	152444331	+	6820408C15Rik	0.0897841	0.0799131	0.0986448	0.101786	0.092532
8	20262613	20297433	-	6820431F20Rik	0.935512	0.745424	0.64711	0.819037	0.786771
6	39527513	39544487	+	8030453O22Rik	0.0330525	0.0261921	0.0049774	0.0358085	0.0250076
18	77631497	77714487	-	8030462N17Rik	0.233763	0.222765	0.229846	0.291346	0.24443
3	35955436	35956258	-	8430422M14Rik	1.29679	0.991572	1.52761	2.55195	1.59198
11	3452365	3479832	+	8430429K09Rik	0.0732233	0.0866457	0.0801618	0.129937	0.092492
1	43092588	43093836	+	8430432A02Rik	0.134864	0.059373	0.0973711	0.176932	0.117135
17	14978468	14991573	+	9030025P20Rik	0.238789	0.179461	0.320945	0.327202	0.266599
7	120673436	120677571	-	9030407P20Rik	0.149247	0.107518	0.117552	0.360453	0.183693
10	43174699	43176563	+	9030612E09Rik	0.993246	0.973921	1.02135	1.48076	1.11732
15	35787154	35790280	+	9130002K18Rik	0.197421	0.142222	0.129579	0.123615	0.148209
17	40875482	40880560	-	9130008F23Rik	0.0441933	0.0656634	0.047861	0.0869676	0.0611713
11	67921504	67947660	+	9130017K11Rik	0.0130538	0.0186679	0.00632389	0.0239101	0.0154889
7	127382260	127387167	-	9130019O22Rik	0.266952	0.346844	0.584637	0.7521	0.487633
6	54269681	54430222	-	9130019P16Rik	0.00230779	0.00172978	0.00130467	0.00184303	0.00179632
7	128234458	128238032	-	9130023H24Rik	0.675581	0.63564	0.6377	0.688758	0.65942
11	69120054	69122590	-	9130213A22Rik	0.0663683	0.102264	0.151885	0.0217676	0.0855712
7	25228687	25230264	+	9130221H12Rik	5.0153	6.53114	5.11111	7.43485	6.0231
15	58022259	58034326	-	9130401M01Rik	0.391263	0.404539	0.436994	0.641273	0.468517
2	167782053	167783487	+	9230111E07Rik	0.156495	0.180852	0.319731	0.311823	0.242225
2	180983924	180987276	+	9230112E08Rik	1.51826	1.38989	1.69845	2.14425	1.68771
9	60523967	60545883	-	9230112J17Rik	0.132115	0.0960553	0.109278	0.255582	0.148258
5	52190672	52279035	+	9230114K14Rik	0.0177777	0.0134169	0.0128354	0.0162429	0.0150682
1	136411916	136415520	-	9230116N13Rik	0.0474411	0.0310849	0.0345606	0.0952725	0.0520898
15	98567324	98569584	+	9330020H09Rik	0.0316986	0.286482	0.153349	0.129282	0.150203
6	128169704	128183804	-	9330102E08Rik	0.155179	0.202323	0.201095	0.22316	0.195439
7	16871347	16874887	-	9330104G04Rik	0.158484	0.167452	0.205965	0.327474	0.214844
13	80962888	81128865	+	9330111N05Rik	0.00135208	0.00196248	0.00195238	0.00166296	0.00173248
17	21528194	21535879	-	9330136K24Rik	0.00730037	0.0241046	0.0210833	0.0143664	0.0167137
12	69197211	69199868	+	9330151L19Rik	0.842415	0.766973	0.594512	0.935294	0.784798
15	57736563	57738667	-	9330154K18Rik	0.293316	0.246522	0.134765	0.236133	0.227684
6	36209620	36390192	-	9330158H04Rik	0.0811595	0.075945	0.0657834	0.0874972	0.0775963
10	29211606	29230780	+	9330159F19Rik	0	0.0193223	0.014788	0	0.00852758
9	88840236	88858871	-	9330159M07Rik	0.0283183	0.0649708	0.0598055	0.0853929	0.0596219
11	69057718	69060484	-	9330160F10Rik	0.0949426	0.257331	0.193876	0.354263	0.225103
12	103406822	103407977	-	9330161L09Rik	0.388595	0.513229	0.526057	0.573535	0.500354
13	24937401	24941418	+	9330162012Rik	0.211323	0.12149	0.173423	0.221343	0.181895
1	188006576	188008991	-	9330162B11Rik	0.0464624	0.0767055	0.0670913	0.13715	0.0818523
7	59223847	59254789	-	9330162G02Rik	0.0286579	0.0201361	0.0162744	0.0355136	0.0251455
8	94422898	94435104	-	9330175E14Rik	0.036771	0.0280604	0.0199114	0.0633162	0.0370147
6	127149389	127212412	+	9330179D12Rik	0.00220102	0.00117572	0.00210561	0.00197771	0.00186502
14	105589476	105632055	+	9330188P03Rik	0.022784	0.022365	0.0163219	0.0267961	0.0220667
4	156109982	156127266	+	9430015G10Rik	0.188266	0.184343	0.171081	0.255509	0.1998
4	3806635	3808752	-	9430025C20Rik	0.0265013	0.140005	0.114803	0.0782277	0.0898842
1	156026223	156030008	-	9430034N14Rik	0.346699	0.205554	0.256844	0.265856	0.268738
9	88595325	88599517	-	9430037G07Rik	0.0724132	0.18632	0.166111	0.168347	0.148298
7	137375574	137410763	-	9430038I01Rik	0.0733398	0.0663295	0.0794265	0.081575	0.0751677
1	92933526	92950591	-	9430060I03Rik	0.0086384	0.0180683	0.0111216	0.0141804	0.0130022
9	90156460	90159805	-	9430062P05Rik	0.385763	0.310124	0.375395	0.363067	0.358587
7	127800094	127802763	-	9430064I24Rik	0.679798	0.863059	0.807815	0.898107	0.812195
9	44378633	44379451	-	9430081H08Rik	0.411516	0.226459	0.297113	0.53988	0.368742
5	101703586	101705851	+	9430085M18Rik	0.346776	0.212642	0.178836	0.414325	0.288145
8	111128886	111145481	-	9430091E24Rik	0.0399244	0.0850697	0.112727	0.117969	0.0889225
12	77236065	77238664	-	9530018F02Rik	0.0215865	0.071275	0.0467561	0.0637199	0.0508344
6	92940329	93272980	+	9530026P05Rik	0.00961335	0.00935543	0.0104721	0.00929308	0.00968349
5	117115218	117118724	+	9530046B11Rik	0.0160021	0.0317017	0.0693207	0.0629808	0.0450013
12	100079519	100080818	-	9530050K03Rik	0.777414	0.684503	0.779568	0.892423	0.783477
2	130523995	130527285	+	9530056E24Rik	0.289896	0.146393	0.147744	0.268463	0.213124
11	52396428	52408729	+	9530068E07Rik	3.78552	3.65337	3.95152	4.68064	4.01776
9	22411513	22444682	+	9530077C05Rik	0.0135315	0.00670181	0.0119966	0.01165	0.01097
17	23743234	23754066	+	9530082P21Rik	0.481471	0.593866	0.694978	1.19155	0.740466
8	13285352	13287467	-	9530085L11Rik	0.477475	0.560548	0.402191	0.652514	0.523182
6	101285826	101288511	-	9530086O07Rik	0.146266	0.110387	0.0603447	0.143918	0.115229
1	195013746	195016449	+	9630010A21Rik	0.228316	0.123359	0.0899142	0.245073	0.171666
4	109651529	109657854	-	9630013D21Rik	0.0266103	0.0761476	0.0320208	0.0698216	0.0511501
11	63964226	63968041	+	9630013K17Rik	0.058824	0.0679793	0.13803	0.159169	0.106001
18	38601534	38789046	+	9630014M24Rik	0.00210689	0.00278173	0.0028156	0.00266072	0.00259123
17	27235075	27248067	-	9630028I04Rik	0.392965	0.319386	0.321133	0.62035	0.413459
14	45484645	45492086	-	9630050E16Rik	0.0753976	0.034853	0.0762114	0.0816059	0.067017
2	129205958	129230580	-	9830144P21Rik	0.011695	0.0264854	0.0255574	0.0236899	0.0218569
14	70154405	70159503	-	9930012K11Rik	0.0440199	0.0581385	0.0556188	0.249051	0.101707
15	60822271	60831794	+	9930014A18Rik	0.371654	0.214182	0.244005	0.401377	0.307805
15	34126944	34130689	+	9930017N22Rik	0.299617	0.20775	0.281219	0.38325	0.292959
19	29714402	29805990	-	9930021J03Rik	0.0728949	0.0764534	0.077839	0.103669	0.0827141
10	41826538	41829122	+	9930024M15Rik	0.521084	0.44447	0.438923	0.512719	0.479299
12	8873187	8893474	-	9930038B18Rik	0	0.0109574	0.00399333	0.0108844	0.00645878
4	124937048	124944657	+	9930104L06Rik	0.825808	1.05172	1.03276	1.32765	1.05948
11	48946150	48979399	-	9930111J21Rik1	0.158814	0.206637	0.242523	0.299847	0.226955
11	49015874	49051243	-	9930111J21Rik2	0.210626	0.212108	0.193622	0.183584	0.199985
6	87805472	87806337	-	9930120I10Rik	0.389156	0.342647	0.280969	0.446727	0.364875
7	45635680	45638766	-	A030001D20Rik	1.09822	1.04533	1.09344	1.51352	1.18763
2	22895321	22895737	-	A130006I12Rik	4.02334e-16	0.357888	0.427295	0.283829	0.267253
1	193168046	193177833	+	A130010J15Rik	0.176288	0.250743	0.213783	0.241423	0.220559
10	115394750	115397885	+	A130012E19Rik	0.0178958	0.0354533	0.0129207	0.12326	0.0473824
8	120101582	120103905	+	A130014A01Rik	0.483025	0.558203	0.488239	0.617852	0.53683
1	54913845	54916595	-	A130048G24Rik	0.122407	0.0943059	0.0589184	0.0200737	0.0739262
15	95787856	95791643	-	A130051J06Rik	0.0459912	0.0718943	0.0910257	0.106949	0.0789651
1	138161820	138167684	-	A130071D04Rik	0.00956742	0.03159	0.0345382	0.0485184	0.0310535
15	60896859	60923013	-	A1bg	0.00643535	0.0113325	0.00929258	0.0147747	0.0104588
1	191025350	191029782	+	A230020J21Rik	0.0285391	0.0368682	0.0688931	0.0475272	0.0454569
8	70863127	70865429	+	A230052G05Rik	0.126881	0.0643766	0.111067	0.0239803	0.0815762
7	55962531	55980869	+	A230056P14Rik	0.0345376	0.10921	0.0231951	0.0421642	0.0522767
10	86020441	86022330	-	A230060F14Rik	0.101725	0.148995	0.220999	0.250507	0.180557
7	89632097	89633125	-	A230065N10Rik	0.911421	0.92775	1.10932	0.837135	0.946406
X	20961684	20986738	+	A230072C01Rik	0.0246323	0.0137625	0.0279845	0.00661005	0.0182473
6	124916863	124925845	+	A230083G16Rik	0.0374772	0.037123	0.0541167	0.0368756	0.0413981
12	111284762	111293989	+	A230087F16Rik	0.0213798	0.01374	0.0366078	0.0349142	0.0266605
8	85053160	85060461	-	A230103J11Rik	0.189146	0.222732	0.248765	0.26925	0.232473
6	121635376	121679228	+	A2m	0.00255876	0.00253458	0.00277112	0.00629421	0.00353967
15	101221195	101225187	-	A330009N23Rik	0.53405	0.723898	0.649401	1.20307	0.777605
1	194976375	195037905	+	A330023F24Rik	0.150838	0.153836	0.170171	0.166045	0.160222
19	37173843	37196542	+	A330032B11Rik	0.0074744	0.0147307	0.0089225	0.0243568	0.0138711
14	122103430	122106975	-	A330035P11Rik	0.0949563	0.114961	0.102837	0.218008	0.132691
5	74172161	74176051	-	A330058E17Rik	0.0576898	0.0285723	0.0624777	0.0851456	0.0584713
8	120204434	120228231	-	A330074K22Rik	0.0165031	0.0217961	0.0357454	0.0278368	0.0254703
18	77729496	77732740	-	A330094K24Rik	0.328595	0.296938	0.237244	0.408405	0.317796
13	29014399	29040337	+	A330102I10Rik	0.0151409	0.00857015	0.00936997	0.0446934	0.0194436
4	128755364	128769299	+	A3galt2	0.0161043	0.0106347	0.0174408	0.0316915	0.0189678
4	153957237	153961926	+	A430005L14Rik	1.07321	1.03497	1.13511	1.41732	1.16515
6	67115673	67168427	+	A430010J10Rik	0	0.00421375	0.00235194	0.00209283	0.00216463
2	52425012	52434886	+	A430018G15Rik	0.0228604	0.00445797	0.0117265	0.0229284	0.0154933
1	189343431	189344898	+	A430027H14Rik	0	0.121757	0.058909	0.134508	0.0787935
5	138622859	138652415	+	A430033K04Rik	0.109606	0.0769712	0.0749763	0.090659	0.0880531
6	8488795	8510431	-	A430035B10Rik	0.00777917	0.0119866	0.0074887	0.00255143	0.00745148
14	21847578	21856932	+	A430057M04Rik	0.0155101	0.0335453	0.0292555	0.0582827	0.0341484
6	86470277	86480831	-	A430078I02Rik	0.0212633	0.0352461	0.015358	0.0313831	0.0258126
13	114124348	114151593	-	A430090L17Rik	0.0123553	0.016318	0.0223012	0.0222878	0.0183156
1	186749396	186752922	+	A430105J06Rik	0.0318227	0.0630438	0.0689275	0.0313118	0.0487764
5	136345884	136350232	-	A430110C17Rik	0.154839	0.0340835	0.0652126	0.190442	0.111144
1	181225986	181228499	+	A430110L20Rik	0.334879	0.398056	0.419087	0.615072	0.441774
15	83226722	83251775	-	A4galt	0.105251	0.167106	0.190786	0.158647	0.155448
13	60483504	60488809	-	A530001N23Rik	0.0634534	0.0349187	0.0381775	0.104058	0.0601519
2	167691177	167729173	+	A530013C23Rik	0.036914	0.0516787	0.0413376	0.0624728	0.0481008
12	112489448	112499928	+	A530016L24Rik	2.10923	2.06101	2.0717	2.83915	2.27027
11	61864568	61868059	-	A530017D24Rik	0.381652	0.56247	0.382902	0.39212	0.429786
3	104499320	104501608	-	A530041M06Rik	0.0245207	0.0809632	0.141631	0.120635	0.0919375
2	114013563	114068325	+	A530058N18Rik	0.0705846	0.072045	0.0768303	0.107947	0.0818517
9	72687224	72688716	+	A530064N14Rik	0.263219	0.322811	0.456512	0.554987	0.399382
17	32396778	32412927	+	A530088E08Rik	0.000748814	0.00820828	0.0106823	0.00738971	0.00675728
13	69543046	69544024	-	A530095I07Rik	0	0.378821	0.33134	0.677334	0.346874
1	85717083	85778644	-	A630001G21Rik	0.0118475	0.0138419	0.0157917	0.0179343	0.0148539
8	126839233	126851474	+	A630001O12Rik	0.00458323	0.0151331	0.0132363	0.0180386	0.0127478
13	93094833	93098969	+	A630019I02Rik	6.98924	1.54389	2.1156	2.50258	3.28783
11	29170909	29173559	-	A630052C17Rik	0.338737	0.573207	0.427992	0.547029	0.471741
12	100941742	100949876	+	A630072L19Rik	0.0981201	0.0824074	0.0700497	0.132506	0.0957708
5	20950989	20956399	+	A630072M18Rik	0.748941	0.293929	0.223245	0.482427	0.437135
16	98001310	98082451	-	A630089N07Rik	0.00276572	0.00273958	0.00349447	0.00544264	0.0036106
3	94994410	94997351	-	A730011C13Rik	0.420298	0.253415	0.492253	0.587311	0.438319
2	130873059	130906397	-	A730017L22Rik	0.243756	0.180085	0.153138	0.276647	0.213406
3	121634936	121643486	-	A730020M07Rik	0.150921	0.10833	0.123177	0.135586	0.129503
2	129218969	129235605	+	A730036I17Rik	0.00674481	0.00939795	0.0121743	0.0232279	0.0128862
6	92816478	92847175	+	A730049H05Rik	0.0159084	0.0156938	0.0189121	0.0082516	0.0146915
7	73314003	73375775	-	A730056A06Rik	0.00985834	0.00250591	0.00634701	0.0109057	0.00740424
14	55559097	55560409	-	A730061H03Rik	1.90445	1.20766	1.24727	1.68232	1.51042
10	127070375	127074797	+	A730063M14Rik	0.215685	0.209457	0.155723	0.249673	0.207634
11	6200029	6201644	+	A730071L15Rik	3.71547e-32	0.11851	0.0659379	0.0818933	0.0665853
13	40956414	41001152	-	A730081D07Rik	0.00272358	0.00538509	0.00394682	0.00831923	0.00509368
9	122380575	122398802	-	A730085K08Rik	0.0103585	0.0114623	0.0072516	0.00355288	0.00815632
9	45954101	45955999	+	A830035O19Rik	0.281016	0.270629	0.459371	0.440371	0.362847
7	73737929	73741025	-	A830073O21Rik	0.685597	0.449577	0.452124	0.657404	0.561176
13	78198017	78279392	+	A830082K12Rik	0.0085452	0.00918954	0.00995548	0.0116926	0.0098457
10	33987216	33995056	-	A830082N09Rik	0.0214681	0.0425304	0.0619995	0.0784614	0.0511149
19	4439003	4448974	+	A930001C03Rik	0.0222159	0.0237533	0.0278359	0.044089	0.0294735
15	86453352	86475099	-	A930001M01Rik	0.0412771	0.0494051	0.0279393	0.0380761	0.0391744
13	47143942	47148671	-	A930002C04Rik	0.35591	0.477897	0.299793	0.525295	0.414724
5	22738910	22746908	-	A930003O13Rik	0.021044	0.0324258	0.0151937	0.0414124	0.027519
2	18025193	18037738	-	A930004D18Rik	0.263858	0.271701	0.364864	0.35203	0.313113
4	131878628	131883238	+	A930004J17Rik	0.559816	0.385757	0.474478	0.586753	0.501701
3	115881581	115888131	-	A930005H10Rik	0.521607	1.15065	1.38894	0.570948	0.908036
1	34269882	34271129	-	A930005N03Rik	1.30316	1.16719	0.894765	1.10286	1.11699
16	91465025	91470129	+	A930006K02Rik	0.0329761	0.0362938	0	0.0865246	0.0389486
9	96705828	96711450	+	A930006L05Rik	0.149689	0.0988494	0.172919	0.0981905	0.129912
16	13754566	13758538	+	A930007A09Rik	0.141247	0.0746198	0.0815838	0.0694898	0.0917351
19	29464750	29523160	-	A930007I19Rik	0.00288153	0.0050743	0.000693483	0.00283527	0.00287115
18	44661665	44676272	+	A930012L18Rik	0.000611219	0.00303631	0.0153498	0.0223474	0.0103362
2	57236227	57238509	-	A930012O16Rik	0.0782118	0.0167762	0.116479	0.0725715	0.0710096
17	35994453	36038436	+	A930015D03Rik	0.00894165	0.00822688	3.00655e-05	3.42602e-06	0.00430051
7	19417466	19421418	-	A930016O22Rik	8.34599	10.1134	10.1716	16.3226	11.2384
17	25946387	25952566	-	A930017K11Rik	0.027239	0.0179877	0.0589994	0.0625375	0.0416909
15	44752280	44884741	+	A930017M01Rik	0.00589224	0.0128483	0.00967602	0.00545332	0.00846747
2	146259286	146267161	+	A930019D19Rik	0.0213727	0.0188184	0	0.0350493	0.0188101
5	122989354	122998346	+	A930024E05Rik	0.0187178	0.0423914	0.0276193	0.0190566	0.0269463
19	40297971	40299556	+	A930028N01Rik	2.14679	1.97793	1.91791	3.08248	2.28128
17	69416660	69439305	-	A930029G22Rik	0.012009	0.0194859	0.0315756	0.0460733	0.0272859
7	99900192	99904157	-	A930030B08Rik	0.0565986	0.0373758	0.020432	0.0417675	0.0390435
10	69209762	69213099	-	A930033H14Rik	0.622063	0.777169	0.861838	0.661705	0.730694
6	47453776	47454321	-	A930035D04Rik	0.205884	0.271917	0.445942	0.479215	0.350739
3	126966475	126967520	-	A930036I15Rik	0.107375	0.0709067	0.155048	0.105651	0.109745
11	119448788	119491299	-	A930037H05Rik	0.0750368	0.069052	0.0615121	0.0829988	0.0721499
12	98831813	98832786	+	A930040O22Rik	0.172981	0.152307	0.166522	0.170204	0.165503
8	47675391	47685240	+	AA386476	0.0113927	0.0338551	0.0329019	0.0280245	0.0265435
17	33981494	33982778	+	AA388235	0.174777	0.0577083	0.157735	0.128978	0.1298
11	4918510	4919004	+	AA413626	0.227139	0.0749974	0.0819967	0.782225	0.29159
X	12936872	12938129	+	AA414768	0.223164	0.14737	0.0966739	0.175665	0.160718
11	83291699	83294633	+	AA465934	6.63525	6.45261	6.73726	9.33217	7.28932
7	110057987	110061326	-	AA474408	1.38169	1.63626	1.48446	2.52928	1.75792
8	85339343	85340273	+	AA672651	0.78424	0.796747	0.566218	0.949724	0.774232
1	130731976	130744623	+	AA986860	0.0709776	0.128896	0.118505	0.0859309	0.101077
9	21526176	21545334	+	AB124611	0.0234276	0.0309416	0.0359436	0.0432217	0.0333836
18	37703539	37705055	+	AC020971.1	0.88818	0.293262	0.454227	0.946748	0.645604
19	7087469	7088422	-	AC109619.1	1.11853	0.699766	0.595057	1.27435	0.921926
15	79889532	79893121	+	AC113595.1	0.042443	0.0588712	0.0246834	0.0332041	0.0398004
1	85199613	85203172	+	AC123856.1	0.0786135	0.0853214	0.0223484	0.206822	0.0982763
12	75630971	75631319	-	AC124742.1	107.515	104.38	136.25	161.697	127.46
7	102235854	102237531	+	AC139579.1	0.143655	0.840671	0.54522	0.0496675	0.394803
10	76440241	76440445	-	AC141477.1	1.43839	2.03713e-20	0.562935	1.15516	0.789121
1	85526602	85552179	+	AC147806.2	0.0176506	0.0196276	0.0122708	0.0209743	0.0176308
6	48564365	48566138	+	AC154013.1	0.0316432	0.0417921	0.159924	0.155676	0.0972588
17	17340820	17374207	-	AC154200.1	0.0201647	0.0210838	0.0109191	0.0297615	0.0204823
17	86175575	86178030	+	AC154542.1	0.871986	0.663465	0.566686	0.905672	0.751952
9	56437457	56438445	+	AC159819.1	30.3963	31.5373	31.1018	45.1258	34.5403
14	44544055	44637202	-	AC160336.1	0.0804078	0.0568079	0.0533671	0.0786809	0.0673159
10	22712085	22731238	-	AC166256.1	0.000624507	0.00267132	0.0166838	0.0163668	0.00908661
16	24122699	24382391	-	AC169509.1	0.01188	0.00969196	0.00610443	0.00823082	0.0089768
12	4589797	4593030	-	AC241534.1	0.23703	0.286486	0.227781	0.273187	0.256121
2	35081861	35101544	-	AI182371	0.00570069	0.00564681	0.00411587	0.0168275	0.00807272
17	27563573	27565757	-	AI413582	1.46712	1.26151	1.24264	1.59506	1.39158
4	53261356	53270233	-	AI427809	0.0379205	0.066777	0.0501938	0.0559676	0.0527147
8	36993604	36995534	+	AI429214	0.494175	0.633476	0.356792	0.457639	0.485521
12	76546972	76547944	-	AI463170	0.0802708	0.281026	0.227511	0.13148	0.180072
7	127091359	127093987	+	AI467606	0.405618	0.253758	0.277441	0.651173	0.396998
5	123133723	123141667	-	AI480526	1.07221	1.08615	1.06731	1.4442	1.16747
5	23698296	23712668	-	AI506816	1.14671	0.61694	0.495685	0.0490669	0.5771
4	141614026	141615605	+	AI507597	0.4192	0.0149747	0.00085229	0.593754	0.257195
9	52673042	52679781	-	AI593442	0.0416259	0.0989579	0.174311	0.131064	0.11149
1	43098710	43115948	+	AI597479	0.471922	0.459939	0.54986	0.717334	0.549764
17	47436615	47470639	+	AI661453	0.0329787	0.022291	0.0261915	0.0324493	0.0284776
11	83223576	83226605	+	AI662270	0	0.0310749	0.0902537	0.145798	0.0667816
19	5425144	5427314	+	AI837181	10.5485	13.2488	14.2239	12.6432	12.6661
4	3242055	3258093	+	AI838599	0.0104945	0.0115503	0.0101026	0.030978	0.0157813
5	31569595	31571398	-	AI839979	0.3734	0.719193	0.808779	0.826663	0.682009
6	48626764	48633690	+	AI854703	0.0648032	0.0802384	0.0994237	0.167378	0.102961
7	41372923	41393380	-	AI987944	0.0642369	0.0857176	0.0906739	0.0901242	0.0826882
13	21495223	21497147	+	AK157302	6.82847	6.93766	7.70666	11.1766	8.16235
11	116285558	116288241	+	AL645861.1	0.146375	0.138087	0.211364	0.229049	0.181219
2	136881271	136891390	-	AL731706.1	0.457823	0.614547	0.684067	0.729234	0.621418
2	136885500	136885680	-	AL731706.2	21.5528	21.254	15.7304	33.0988	22.909
12	105513480	105515247	+	AU015791	0.0952519	0.0629011	0.114619	0.0937228	0.0916237
7	75769038	75782100	-	AU020206	1.12963	1.50895	1.33657	2.0328	1.50199
16	5211823	5222300	-	AU021092	0.2731	0.388982	0.390488	0.416246	0.367204
4	119203570	119232713	-	AU022252	0.798919	0.809123	0.868698	1.06352	0.885065
4	126753544	126870071	+	AU040320	0.356282	0.374233	0.367427	0.514474	0.403104
10	82128013	82153066	+	AU041133	0.0134363	0.00295763	0.00808414	0.00881375	0.00832295
2	120850705	120866690	+	AV039307	0.0111573	0.00770338	0.00286001	0.0185513	0.010068
2	132253357	132261334	+	AV099323	0.0281326	0.0139333	0.0152337	0	0.0143249
7	116443575	116444325	+	AV356131	0.224413	0.246992	0.216034	0.147207	0.208661
4	156203270	156210564	+	AW011738	0.99223	0.873647	0.866327	1.6196	1.08795
8	57651757	57663431	+	AW046200	0.0052915	0.00866281	0.00727866	0.0266379	0.0119677
19	11047612	11055809	-	AW112010	0.10951	0.167232	0.138365	0.154894	0.1425
7	41478874	41499891	-	AW146154	0.128961	0.0889185	0.0672571	0.107127	0.0980659
13	14630154	14639097	+	AW209491	0.451687	0.559273	0.584292	0.820973	0.604056
15	3982035	3995745	-	AW549877	0.22347	0.286745	0.271815	0.258101	0.260033
9	39587396	39604404	-	AW551984	0.0131946	0.0130699	0.00714482	0.0162285	0.0124095
18	25168999	25467322	+	AW554918	0.0105315	0.0113013	0.012356	0.012953	0.0117854
9	54950230	54950999	-	AY074887	0.372169	0.263165	0.5823	0.731282	0.487229
15	102338252	102350772	-	Aaas	0.748343	0.701322	0.627655	0.961198	0.759629
5	125475814	125517411	+	Aacs	0.0606931	0.0632368	0.0574531	0.128727	0.0775275
9	63602660	63644589	+	Aagab	0.244864	0.30131	0.336193	0.470018	0.338096
6	86849517	87003224	+	Aak1	0.568307	0.516779	0.514147	0.734085	0.583329
7	97550331	97579498	-	Aamdc	0.738633	0.684653	0.742994	0.942537	0.777204
1	74279840	74284739	-	Aamp	10.9197	11.7749	11.6417	16.7548	12.7728
11	116586432	116597681	+	Aanat	0.0199496	0.0131741	0.0144035	0.0294441	0.0192428
2	156547584	156568973	+	Aar2	0.642634	0.727499	0.710173	0.895571	0.743969
8	111033144	111057665	+	Aars	2.4916	2.07748	2.07479	3.0009	2.41119
17	45506841	45520844	+	Aars2	1.60261	1.50016	1.59098	2.21946	1.7283
11	101406839	101417616	-	Aarsd1	1.41044	1.13826	1.52583	2.10744	1.54549
5	76873659	76905515	-	Aasdh	0.341664	0.250046	0.272111	0.419357	0.320794
9	4294793	4309472	-	Aasdhppt	0.363091	0.327998	0.353213	0.428715	0.368254
11	84422855	84513523	-	Aatf	0.0649716	0.0723257	0.0786288	0.0840205	0.0749867
11	120007313	120047168	-	Aatk	0.161884	0.178481	0.201236	0.23408	0.19392
16	8513429	8621569	+	Abat	0.0757452	0.0757146	0.053564	0.0781026	0.0707816
4	53030787	53159896	-	Abca1	0.28028	0.192835	0.197969	0.296731	0.241954
1	71242276	71414911	-	Abca12	0.0233987	0.0150225	0.0175977	0.0156685	0.0179218
2	25428703	25448541	+	Abca2	5.72968	5.27213	5.56814	6.9734	5.88584
17	24351950	24410202	+	Abca3	0.499995	0.432505	0.497129	0.653186	0.520704
3	122044443	122180124	+	Abca4	0.0169533	0.0360436	0.032541	0.0406856	0.0315559
11	110269369	110337717	-	Abca5	0.0664887	0.0731782	0.0734885	0.0533063	0.0666154
11	110176820	110251777	-	Abca6	0.0574091	0.0667642	0.0654257	0.0681017	0.0644252
10	79996494	80015573	+	Abca7	1.24093	1.10686	1.26536	1.72735	1.33513
11	110025634	110095979	-	Abca8a	0.510481	0.498201	0.495582	0.619222	0.530871
11	109932190	109995846	-	Abca8b	0.182044	0.16537	0.149575	0.183023	0.170003
11	110100749	110168197	-	Abca9	0.121691	0.143323	0.127276	0.159271	0.13789
8	123952459	123983123	-	Abcb10	1.30239	1.25115	1.3712	1.69914	1.40597
5	8660077	8748576	+	Abcb1a	0.180569	0.181496	0.227587	0.221205	0.202714
5	8798147	8866316	+	Abcb1b	0.0395039	0.0507145	0.0480807	0.069312	0.0519028
5	8893717	8959232	+	Abcb4	0.21978	0.223843	0.219225	0.281218	0.236017
1	75171717	75180393	-	Abcb6	1.97185	2.11239	2.3219	3.08453	2.37267
X	104280657	104413857	-	Abcb7	0.070761	0.0598009	0.0620368	0.0650663	0.0644163
5	24393663	24410055	+	Abcb8	3.65191	4.07055	4.29722	5.69473	4.4286
5	124061530	124095799	-	Abcb9	0.364677	0.334065	0.402889	0.614617	0.429062
16	14361558	14475738	+	Abcc1	0.347882	0.358872	0.359371	0.487821	0.388487
17	46303221	46328353	-	Abcc10	0.28574	0.246186	0.319125	0.441499	0.323137
11	94343295	94392998	-	Abcc3	0.0519235	0.0559052	0.0594927	0.0688604	0.0590454
14	118482692	118706220	-	Abcc4	0.0542138	0.0474032	0.0516459	0.0686552	0.0554795
16	20331303	20426395	-	Abcc5	0.545151	0.500259	0.466863	0.604321	0.529149
7	46104523	46180034	-	Abcc8	0.829913	0.652063	0.746709	0.98034	0.802256
6	142587862	142702316	-	Abcc9	2.66253	2.59542	2.53954	3.22401	2.75537
X	73716597	73738535	+	Abcd1	2.04845	2.14984	2.27662	2.74278	2.30442
15	91145871	91191800	-	Abcd2	0.0329811	0.0467858	0.0440967	0.0805282	0.051098
3	121758774	121815303	-	Abcd3	0.582581	0.549218	0.659232	0.860327	0.66284
12	84601464	84617414	-	Abcd4	0.355263	0.401845	0.459665	0.584906	0.45042
8	79683462	79711741	-	Abce1	0.408688	0.389093	0.399635	0.468388	0.416451
17	35956819	35969762	-	Abcf1	7.02985	7.12971	6.93845	9.5779	7.66898
5	24565345	24577468	-	Abcf2	4.06661	3.76951	4.07877	5.18483	4.27493
16	20548577	20561380	+	Abcf3	2.25676	2.27738	2.16089	3.18204	2.46927
17	31057675	31117989	+	Abcg1	0.128366	0.114867	0.0993955	0.16017	0.1257
6	58584523	58695677	+	Abcg2	0.0484546	0.0596625	0.0597644	0.0586026	0.056621
9	44273188	44288616	-	Abcg4	0.0254552	0.0192112	0.0210041	0.0214685	0.0217848
5	30950066	30955092	+	Abhd1	2.78119	2.47547	2.74122	7.22232	3.80505
16	45729725	45742956	-	Abhd10	0.36109	0.377704	0.307756	0.52098	0.391882
5	135009152	135012176	+	Abhd11	8.9359	8.58351	8.9265	12.1772	9.65578
5	135012114	135013254	-	Abhd11os	0.4252	0.608503	0.545876	1.08795	0.666882
2	150832493	150904742	-	Abhd12	0.25936	0.245115	0.269112	0.346884	0.280118
8	9977707	9992156	+	Abhd13	0.357223	0.369231	0.350425	0.401155	0.369508
9	106440051	106447679	-	Abhd14a	0.823742	0.835386	0.92049	1.63367	1.05332
9	106447459	106452924	+	Abhd14b	1.10731	1.06024	1.17456	1.69936	1.26037
11	77515121	77538608	+	Abhd15	0.0816097	0.0570306	0.0824636	0.0743077	0.0738529
17	35089263	35102988	+	Abhd16a	2.2891	2.19458	2.1869	2.82751	2.37452
2	181493206	181494981	+	Abhd16b	0.12643	0.0834901	0.045641	0.0933004	0.0872154
10	80583654	80590342	-	Abhd17a	2.55015	2.7144	3.14336	3.98668	3.09865
19	21653185	21685638	+	Abhd17b	0.0795228	0.0924706	0.0624078	0.107163	0.0853911
7	84109356	84151894	-	Abhd17c	0.341595	0.344028	0.364708	0.5139	0.391058
3	40846970	40938139	+	Abhd18	0.252591	0.295685	0.279959	0.359949	0.297046
7	79273199	79365509	+	Abhd2	0.306317	0.287392	0.289629	0.411471	0.323702
18	10642092	10706772	-	Abhd3	0.0372981	0.0166112	0.0200403	0.0298716	0.0259553
14	54254188	54270638	+	Abhd4	2.55449	2.9504	2.68647	3.37256	2.89098
9	122351608	122381525	+	Abhd5	0.605038	0.680319	0.687455	0.735912	0.677181
14	8002902	8056764	+	Abhd6	0.0944505	0.0929227	0.111783	0.138298	0.109364
8	71456705	71463656	-	Abhd8	2.42138	2.44113	3.08069	3.84377	2.94674
2	22940073	23040242	-	Abi1	0.147885	0.121315	0.13021	0.158402	0.139453
1	60409619	60481159	+	Abi2	0.147434	0.125326	0.127963	0.119603	0.130081
11	95830074	95842477	-	Abi3	1.12192	1.16569	1.30247	1.89472	1.3712
16	56477878	56690136	+	Abi3bp	0.0303964	0.0274037	0.0249995	0.0228865	0.0264215
4	56802345	56809602	+	Abitram	0.231928	0.224631	0.256758	0.281452	0.248692
2	31688376	31804228	+	Abl1	0.686213	0.612629	0.67371	0.910579	0.720783
1	156558786	156649569	+	Abl2	0.348549	0.370549	0.368103	0.477316	0.391129
19	57032733	57314920	-	Ablim1	1.45295	1.41149	1.34817	1.8027	1.50383
5	35757880	35884974	+	Ablim2	0.149204	0.192394	0.183897	0.264517	0.197503
18	61799392	61911825	-	Ablim3	0.464064	0.566769	0.577514	0.535172	0.53588
11	76416734	76623559	-	Abr	0.151363	0.158172	0.140643	0.231674	0.170463
15	41864076	41869721	-	Abra	5.18794	6.05775	5.48217	5.51538	5.56081
10	18011260	18023289	-	Abracl	0.536361	0.449672	0.488272	0.440557	0.478715
5	100805192	100820966	-	Abraxas1	0.177835	0.237073	0.174619	0.258971	0.212124
7	132859225	132885112	+	Abraxas2	0.376458	0.395829	0.360211	0.468517	0.400254
13	23418361	23423867	-	Abt1	1.3552	1.03623	1.11823	1.43371	1.23584
6	88835914	88841985	-	Abtb1	3.01263	3.02688	3.41612	3.62805	3.27092
2	103566310	103718424	+	Abtb2	0.197321	0.146623	0.154448	0.279799	0.194548
9	119339676	119350300	+	Acaa1a	3.28636	3.52213	3.56045	4.96892	3.83446
18	74779197	74806209	+	Acaa2	12.6032	12.6256	13.1574	15.2557	13.4105
11	84129672	84401652	+	Acaca	0.0384022	0.0283286	0.0317737	0.050531	0.0372589
5	114146535	114250762	+	Acacb	4.77408	4.28506	4.54226	6.4298	5.0078
5	121621026	121660515	-	Acad10	0.130339	0.178675	0.14364	0.183925	0.159145
9	104063377	104127726	+	Acad11	1.38148	1.43332	1.46064	1.87358	1.53726
5	121596775	121618939	-	Acad12	2.83063	2.63198	2.65541	3.73704	2.96376
9	26974135	26999567	-	Acad8	0.89123	0.895917	0.848927	1.22422	0.965073
3	36065979	36092854	+	Acad9	0.669373	0.712714	0.728078	0.957726	0.766973
1	66830839	66863278	-	Acadl	10.3961	10.3098	10.1157	12.1264	10.737
3	153922357	153944633	-	Acadm	21.3114	23.4849	22.414	28.2432	23.8634
5	115110299	115119347	-	Acads	13.3129	14.364	15.1274	19.9872	15.6979
7	131410601	131448945	+	Acadsb	1.58753	1.52566	1.56663	1.97668	1.66413
11	70010183	70015412	-	Acadvl	96.3998	93.9225	95.4849	129.451	103.815
11	69881567	69895540	-	Acap1	0.0481815	0.0477261	0.0550792	0.102717	0.063426
16	31092412	31201246	-	Acap2	0.122534	0.156424	0.156715	0.159536	0.148802
4	155891822	155907252	+	Acap3	1.14897	1.13331	1.24696	1.42747	1.23918
9	53580522	53610383	-	Acat1	7.42313	7.10804	7.11071	8.89384	7.63393
17	12942890	12960748	-	Acat2	0.101788	0.104767	0.117452	0.123757	0.111941
17	12923813	12940601	-	Acat3	0.0430225	0.0110262	0.0258243	0.0767961	0.0391673
1	180726043	180754205	+	Acbd3	0.608954	0.56569	0.586841	0.700144	0.615407
11	103101682	103112201	+	Acbd4	1.8614	1.71878	1.67894	2.06243	1.83039
2	23068167	23115559	+	Acbd5	0.236416	0.190747	0.214524	0.293532	0.233805
1	155558120	155691331	+	Acbd6	0.10866	0.0962298	0.113117	0.122248	0.110064
2	93833467	93849944	-	Accs	0.251966	0.25633	0.265503	0.398684	0.293121
8	105695860	105701103	-	Acd	1.51949	1.60728	1.53647	1.67585	1.58477
11	105967945	105989965	+	Ace	2.447	3.90036	3.92698	3.15135	3.35642
X	164139332	164188421	+	Ace2	0.0114289	0.016604	0.0181536	0.0134945	0.0149202
4	86874396	86934823	+	Acer2	0.178262	0.347637	0.342542	0.231127	0.274892
7	98206389	98321209	-	Acer3	0.0175903	0.0155541	0.0165807	0.0206734	0.0175996
5	137287519	137294467	+	Ache	0.549083	0.362596	0.378946	0.66739	0.489504
14	54642161	54686932	-	Acin1	2.54295	2.15624	2.30172	3.27764	2.56964
9	121898355	121911075	+	Ackr2	0.163194	0.125243	0.124194	0.238691	0.16283
1	90203980	90216752	+	Ackr3	7.09418	5.25621	5.56597	5.03965	5.739
9	104084157	104126934	-	Ackr4	0.121304	0.112163	0.0990681	0.0967674	0.107326
11	100476353	100528001	-	Acly	0.597444	0.566692	0.608599	0.778104	0.63771
4	40143081	40198339	+	Aco1	0.429471	0.44385	0.420033	0.586413	0.469942
15	81872309	81915134	+	Aco2	38.3039	36.1059	36.9468	47.1985	39.6388
12	84009490	84018372	+	Acot1	1.28538	0.950609	0.863837	1.50428	1.15103
15	20665214	20666751	-	Acot10	0.118785	0.191772	0.242819	0.201317	0.188673
4	106744555	106804999	-	Acot11	0.634462	0.554457	0.552763	0.713492	0.613793
13	24817948	24831541	-	Acot13	7.42927	7.44354	7.61375	8.36995	7.71413
12	83987861	83993874	+	Acot2	8.18097	8.92033	9.57122	8.91794	8.89762
12	84052144	84060403	+	Acot3	0.0283358	0.0177248	0.00704071	0.0220656	0.0187917
12	84038379	84048602	+	Acot4	0.202876	0.076923	0.0897354	0.115187	0.12118
12	84100654	84111350	+	Acot6	0.155529	0.115095	0.085651	0.135818	0.123023
4	152178134	152271856	+	Acot7	0.442976	0.397278	0.443433	0.496528	0.445054
2	164792765	164804883	-	Acot8	0.432339	0.484287	0.37346	0.519052	0.452284
X	155262443	155297655	+	Acot9	0.109533	0.0831673	0.0848806	0.104089	0.0954175
11	116171888	116199046	-	Acox1	7.29216	6.22871	6.11051	8.21056	6.96049
14	8225511	8259354	-	Acox2	0.00331551	0.00766307	0.00957512	0.011418	0.00799292
5	35583040	35615353	+	Acox3	0.803076	0.872855	0.858779	1.08483	0.904885
12	30893326	30911590	-	Acp1	0.567229	0.675968	0.647985	0.942281	0.708366
2	91202885	91214099	+	Acp2	1.56028	1.54908	1.51154	2.04766	1.66714
9	22126727	22135712	-	Acp5	0.0437088	0.00746564	0.0450822	0.0601047	0.0390903
3	97158777	97177300	+	Acp6	1.13582	0.916068	1.02999	1.3262	1.10202
15	89568326	89574586	+	Acr	0.268866	0.153877	0.129413	0.220458	0.193153
6	125049689	125063268	+	Acrbp	0.131981	0.12229	0.163932	0.232966	0.162792
9	54604877	54661871	-	Acsbg1	0.00196875	0.00260019	0.00426428	0.00484285	0.00341902
17	56875477	56888905	+	Acsbg3	0.00417809	0.0165544	0.00904968	0.0205551	0.0125843
11	94557102	94601872	-	Acsf2	0.540844	0.519607	0.511721	0.613934	0.546527
8	122775486	122817881	+	Acsf3	0.510812	0.555796	0.591425	0.819023	0.619264
8	46471037	46536052	+	Acsl1	8.75193	8.91516	8.46364	11.3505	9.37031
1	78657825	78707744	+	Acsl3	0.0236016	0.0152796	0.0200102	0.025051	0.0209856
X	142317993	142390536	-	Acsl4	0.0719244	0.0617964	0.0563961	0.0547895	0.0612266
19	55251938	55297721	+	Acsl5	0.118269	0.148856	0.115434	0.187109	0.142417
11	54303798	54364757	+	Acsl6	0.0574312	0.069582	0.0765955	0.0786319	0.0705601
7	119519463	119545552	+	Acsm5	0.00860184	0.0454429	0.0403682	0.0148116	0.0273061
2	150618105	150668501	-	Acss1	4.60614	4.60435	4.60427	5.78381	4.89964
2	155517948	155585725	+	Acss2	0.361161	0.333824	0.347424	0.414191	0.36415
2	155547040	155556931	-	Acss2os	0.0142159	0.0183227	0.0258943	0.0310314	0.0223661
10	106933517	107123669	-	Acss3	0.00236036	0.00389674	0.00191719	0.00290308	0.00276934
8	123891769	123894752	-	Acta1	58.3216	50.1217	55.5767	47.6109	52.9077
19	34241090	34255591	-	Acta2	9.79411	8.72278	8.53284	11.4755	9.63131
5	142903115	142906755	-	Actb	109.851	133.023	140.713	187.443	142.757
X	152489661	152491861	-	Actb-ps1	0.100147	0.145895	0.116025	0.179119	0.135296
13	111255013	111257750	+	Actbl2	0.122989	0.0406088	0.0295991	0.0605072	0.063426
2	114047282	114053549	-	Actc1	888.074	857.925	885.382	1122.57	938.488
8	46228994	46230118	+	Actg-ps1	0.00362489	0.415697	0.15242	0.293797	0.216385
11	120345690	120348543	-	Actg1	33.5427	58.3705	59.2908	58.6284	52.4581
6	83512905	83536266	-	Actg2	0.0264186	0.0269619	0.0326079	0.0259953	0.0279959
3	32706298	32726974	+	Actl6a	0.373199	0.321576	0.362787	0.525786	0.395837
12	80167547	80260372	-	Actn1	0.307487	0.310062	0.328413	0.42714	0.343276
13	12269426	12340761	-	Actn2	24.0107	22.0328	22.6591	25.6471	23.5874
19	4861216	4877910	-	Actn3	0.00336297	0.00887714	0.00485521	0.0132463	0.0075854
7	28893248	28962341	-	Actn4	1.63094	1.66631	1.67187	2.18783	1.78924
12	70937857	70964719	+	Actr10	0.265249	0.346185	0.349843	0.445945	0.351805
19	46376811	46395749	-	Actr1a	4.03491	3.69159	3.73881	4.93207	4.09934
1	36698114	36714423	-	Actr1b	5.02932	4.90909	5.10398	6.71206	5.43861
11	20062304	20112914	-	Actr2	0.362039	0.401823	0.372761	0.499486	0.409027
1	125392905	125435728	-	Actr3	0.590876	0.589965	0.685888	0.882621	0.687338
X	81820384	81822731	-	Actr3-ps	5.67203	6.63588	5.5287	7.60884	6.36136
5	25759997	25850689	+	Actr3b	0.213421	0.209158	0.225551	0.260516	0.227162
2	158624888	158639212	+	Actr5	0.278088	0.274167	0.26582	0.354555	0.293157
10	89711971	89732296	-	Actr6	0.0966109	0.0729126	0.0697527	0.051604	0.07272
14	29978337	30006355	+	Actr8	0.758912	0.67306	0.670817	0.853122	0.738978
2	58388644	58567158	-	Acvr1	0.0505991	0.0429607	0.0378937	0.0587546	0.047552
15	101174067	101213685	+	Acvr1b	0.521128	0.543322	0.543929	0.620052	0.557108
2	48814109	48903270	+	Acvr2a	0.0502884	0.0354329	0.0394205	0.0531093	0.0445628
9	119402118	119434996	+	Acvr2b	0.15699	0.156633	0.176179	0.228346	0.179537
15	101128522	101145337	+	Acvrl1	1.75166	1.70096	1.83579	2.22912	1.87938
9	106432981	106438320	-	Acy1	1.82843	1.99157	2.20778	1.80942	1.9593
19	3986570	3990008	+	Acy3	3.87472	4.82874	4.50461	5.82481	4.75822
12	85272398	85288439	-	Acyp1	0.23783	0.210176	0.217165	0.313163	0.244584
11	30505991	30649588	-	Acyp2	0.237546	0.22369	0.229052	0.26564	0.238982
2	163726584	163750240	-	Ada	0.0166014	0.0485505	0.0376708	0.037337	0.0350399
2	121140428	121156681	+	Adal	0.175681	0.126661	0.173836	0.219718	0.173974
9	70678997	70780230	+	Adam10	0.135225	0.150416	0.15405	0.200672	0.160091
11	102761439	102780263	+	Adam11	0.438121	0.318843	0.39594	0.651031	0.450984
7	133883199	134232147	-	Adam12	0.00192934	0.00191111	0.00197338	0.00516516	0.00274475
3	89338542	89349997	-	Adam15	4.5758	4.26254	4.79021	7.11893	5.18687
12	21323509	21373633	-	Adam17	0.424902	0.368125	0.386192	0.570485	0.437426
11	46055992	46147344	+	Adam19	0.241162	0.178178	0.199701	0.274778	0.223455
5	121518576	121545483	-	Adam1a	0.0911909	0.0989096	0.129645	0.219662	0.134852
5	121500098	121503436	-	Adam1b	0.28213	0.260582	0.190998	0.270093	0.250951
5	8072352	8368161	-	Adam22	0.0121383	0.0112721	0.0109547	0.0134364	0.0119504
1	63445891	63596277	+	Adam23	0.0141764	0.0155205	0.016969	0.0209232	0.0168973
2	131050591	131063815	-	Adam33	0.0933359	0.13728	0.131713	0.137756	0.125021
12	81419443	81421947	-	Adam4	0.127968	0.0819484	0.0245091	0.154321	0.0971866
7	139978932	139992563	-	Adam8	0.0246952	0.0434876	0.0416029	0.0850456	0.0487078
8	24949611	25016928	-	Adam9	0.46755	0.45185	0.43204	0.61257	0.491003
16	85793827	85803114	-	Adamts1	2.8695	3.93745	4.29621	2.53218	3.40884
17	33524204	33553783	+	Adamts10	1.20442	0.981986	1.08733	1.71511	1.24721
15	11064790	11349232	+	Adamts12	0.00571996	0.00833604	0.0088292	0.00853924	0.00785611
10	61197112	61273439	-	Adamts14	0.018376	0.0378608	0.031311	0.0282063	0.0289385
9	30899155	30922453	-	Adamts15	0.378068	0.351437	0.325122	0.518903	0.393382
7	66839735	67153172	+	Adamts17	0.00268491	0.00236403	0.00284312	0.00493138	0.00320586
18	58836667	59054061	+	Adamts19	0.00567759	0.00443097	0.00540348	0.00482466	0.00508417
11	50602084	50807574	+	Adamts2	0.110028	0.111062	0.111571	0.166556	0.124804
15	94270163	94465419	-	Adamts20	0.00258599	0.00284617	0.00186707	0.00254448	0.00246093
5	89677087	89883335	-	Adamts3	0.0190413	0.0163465	0.0137478	0.0224828	0.0179046
1	171250421	171260638	+	Adamts4	0.0384382	0.0297299	0.0405389	0.07777	0.0466193
16	85856173	85901829	-	Adamts5	0.484158	0.602115	0.608625	0.592459	0.571839
13	104287835	104496696	+	Adamts6	0.0126249	0.0081597	0.0110545	0.014801	0.01166
9	90163069	90208072	+	Adamts7	0.708303	0.660494	0.689462	1.00094	0.7648
9	30942562	30963839	+	Adamts8	0.0316417	0.0104475	0.0241154	0.0207558	0.0217401
6	92772699	92943493	-	Adamts9	0.120562	0.144193	0.127041	0.146226	0.134505
4	85514172	86428386	+	Adamtsl1	0.00245471	0.00303939	0.00265844	0.00428717	0.00310993
2	27079379	27108982	+	Adamtsl2	0.494644	0.260316	0.243561	0.693692	0.423053
7	82335694	82614451	+	Adamtsl3	0.0299881	0.0167463	0.0190357	0.0382201	0.0259976
3	95676201	95687918	-	Adamtsl4	5.09945	5.18562	5.32385	6.32262	5.48289
10	80339110	80348413	-	Adamtsl5	11.1025	10.4541	11.2597	13.3452	11.5404
5	139271876	139325623	-	Adap1	0.0208768	0.0289513	0.0248704	0.0421105	0.0292022
11	80154105	80178959	+	Adap2	0.383871	0.580395	0.494372	0.473125	0.482941
11	80158861	80177630	-	Adap2os	0.0865169	0.147343	0.130918	0.102894	0.116918
3	89715022	89753447	+	Adar	0.558517	0.55242	0.60603	0.856793	0.64344
10	77290726	77418271	-	Adarb1	0.214657	0.205367	0.221674	0.288684	0.232596
8	111966908	111992303	-	Adat1	0.108252	0.115253	0.113249	0.169554	0.126577
10	13552894	13563377	+	Adat2	0.154092	0.155955	0.146868	0.30878	0.191424
10	80602880	80607655	+	Adat3	0.080418	0.0499634	5.05915e-05	0.00170844	0.0330351
12	88360554	88461725	+	Adck1	0.190587	0.195352	0.194872	0.246905	0.206929
6	39573873	39588770	+	Adck2	0.610106	0.534704	0.579414	0.848586	0.643203
15	76576358	76595817	+	Adck5	0.198191	0.25132	0.191909	0.246808	0.222057
11	7063489	7178507	+	Adcy1	0.0185356	0.0132066	0.0133826	0.0230375	0.0170406
12	4133103	4213526	+	Adcy3	0.0547873	0.0533462	0.0617065	0.0774809	0.0618302
14	55769057	55784096	-	Adcy4	2.23458	1.66533	1.72648	2.7493	2.09392
16	35154877	35305739	+	Adcy5	0.882111	0.740424	0.800397	1.17056	0.898373
15	98589973	98610077	-	Adcy6	17.2798	15.8732	16.4064	20.8089	17.5921
8	88272403	88329963	+	Adcy7	0.200787	0.218842	0.187895	0.328953	0.234119
15	64697084	64922297	-	Adcy8	0.00448402	0.00164505	0.00089929	0.00171579	0.00218604
16	4287529	4420499	-	Adcy9	0.21687	0.193087	0.226948	0.318421	0.238832
6	55451978	55501452	+	Adcyap1r1	0.144018	0.103342	0.117899	0.20419	0.142362
5	34573664	34632309	+	Add1	1.71434	1.75142	1.75233	2.26194	1.87001
19	53140443	53247400	+	Add3	0.38449	0.312097	0.326453	0.499087	0.380532
8	27085583	27123437	+	Adgra2	0.431515	0.405702	0.439299	0.659877	0.484098
5	49959956	50059007	-	Adgra3	0.173888	0.15934	0.184434	0.198962	0.179156
4	129984870	130022634	+	Adgrb2	0.0490258	0.0382613	0.036469	0.0540859	0.0444605
5	129096750	129204600	+	Adgrd1	0.089474	0.0924073	0.095022	0.0778007	0.088676
17	57358691	57483528	+	Adgre1	0.0368518	0.0299745	0.0279048	0.0327227	0.0318635
17	55749984	55853663	+	Adgre4	0.00270563	0.00142936	0.00078138	0	0.00122909
8	83723251	83741327	-	Adgre5	2.51762	2.18188	2.01919	3.64113	2.58996
17	42696130	42742180	-	Adgrf2	0.00487325	0.00321813	0.00615732	0.00239751	0.00416155
5	30193431	30205723	-	Adgrf3	0.0182569	0.00904216	0	0.0134728	0.010193
17	42656891	42692285	-	Adgrf4	0.00475533	0.00314026	0.00572221	0.00311933	0.00418428
17	43360451	43459558	+	Adgrf5	2.07245	2.42054	2.32553	2.10216	2.23017
8	94974751	95014218	+	Adgrg1	1.40731	2.12154	2.21996	1.62808	1.84422
X	160390690	160498071	+	Adgrg2	0.00417976	0.00414026	0.00301777	0.00102817	0.00309149
8	95017692	95045251	+	Adgrg3	0.0407151	0.051085	0.0426244	0.0801229	0.0536368
8	94923694	94943281	+	Adgrg5	0.0171859	0.015132	0.0144762	0.0394567	0.0215627
10	14402583	14545660	-	Adgrg6	0.00313696	0.0054378	0.00424663	0.0046299	0.00436282
8	83900105	83941955	+	Adgrl1	1.01826	0.922795	0.952881	1.35176	1.06142
3	148815583	148990556	-	Adgrl2	0.342909	0.284154	0.271534	0.430699	0.332324
5	81020138	81825134	+	Adgrl3	0.00146357	0.00216307	0.00181147	0.00290453	0.00208566
3	151437887	151545087	+	Adgrl4	0.283134	0.307242	0.296619	0.282708	0.292426
3	138260991	138290699	+	Adh1	0.322006	0.912834	0.84851	0.194897	0.569562
3	138443093	138455500	+	Adh5	1.89468	1.75584	1.92623	2.30475	1.97038
3	138374121	138395003	+	Adh6-ps1	0	0.0106938	0.00595604	0.0055876	0.00555936
3	138341775	138358862	+	Adh6b	0	0.0261831	0.0477898	0.00646137	0.0201086
1	9547948	9580674	+	Adhfe1	1.21072	1.2068	1.23789	1.28718	1.23565
12	28675231	28682176	+	Adi1	1.96299	2.00581	2.2105	2.77404	2.23833
2	158502612	158508199	+	Adig	0.0200835	0.026525	0.0362506	0.0592834	0.0355356
16	23146536	23158029	+	Adipoq	0.0195261	0.00644718	0	0.0528347	0.019702
1	134415378	134433352	+	Adipor1	6.18027	6.29307	6.59169	7.50618	6.6428
6	119353150	119417705	-	Adipor2	0.856039	1.04796	0.995177	1.18607	1.02131
14	21052574	21448570	+	Adk	0.108808	0.110962	0.111496	0.132014	0.11582
7	110627661	110629821	+	Adm	1.81816	2.367	2.13784	2.14677	2.11744
2	168180986	168207113	-	Adnp	0.624378	0.748451	0.833105	1.07313	0.819766
18	80126311	80151483	-	Adnp2	0.450218	0.537216	0.474709	0.710539	0.543171
10	67544511	67549069	-	Ado	2.58484	2.30843	2.47055	3.35479	2.67965
1	134199223	134235432	-	Adora1	0.469964	0.560734	0.566385	0.519401	0.529121
10	75316877	75334785	+	Adora2a	0.422937	0.424112	0.511193	0.567193	0.481359
11	62248984	62266454	+	Adora2b	0.0321141	0.0466555	0.0440539	0.0505577	0.0433453
9	59291558	59324053	+	Adpgk	0.172676	0.225879	0.206099	0.267222	0.217969
16	38444030	38452704	-	Adprh	2.02448	2.03311	2.12946	3.24572	2.35819
8	13221663	13254163	-	Adprhl1	13.1213	11.2472	11.5202	14.5256	12.6036
4	126316047	126321704	-	Adprhl2	1.29919	1.33603	1.33183	1.68819	1.41381
11	67037905	67052595	-	Adprm	0.106936	0.0857493	0.113054	0.13904	0.111195
14	66635251	66771169	+	Adra1a	0.172126	0.217248	0.205634	0.183172	0.194545
11	43774606	43901211	-	Adra1b	0.140031	0.151877	0.16925	0.251586	0.178186
2	131545850	131562284	-	Adra1d	0.180934	0.0834126	0.11831	0.21498	0.149409
2	127363208	127367222	+	Adra2b	0.265561	0.572252	0.343103	0.371319	0.388059
5	35278319	35281764	+	Adra2c	0.0651418	0.129052	0.11758	0.032048	0.0859555
19	56722199	56733114	+	Adrb1	0.878944	0.906277	1.07992	1.99772	1.21572
18	62177816	62179960	-	Adrb2	0.628023	1.10593	1.36029	1.21013	1.07609
2	180171485	180176287	+	Adrm1	2.60856	2.4546	3.33263	4.1274	3.1308
15	80948490	80970947	+	Adsl	1.59139	1.54913	1.55662	2.28362	1.74519
1	177762962	177796512	-	Adss	0.0685615	0.0463799	0.0519158	0.0575885	0.0561114
12	112620045	112641361	+	Adssl1	2.23981	2.36032	2.70979	3.43654	2.68661
11	5861947	5872089	+	Aebp1	1.52677	1.69134	1.62552	2.37314	1.80419
6	140622663	140678473	+	Aebp2	0.318401	0.367521	0.404887	0.452893	0.385925
7	78895854	78911210	+	Aen	1.70619	1.85774	1.94672	2.90465	2.10383
5	35893319	36003924	+	Afap1	0.242968	0.252228	0.232554	0.373824	0.275394
18	61730261	61786703	-	Afap1l1	1.3005	1.50662	1.6088	2.13595	1.63797
19	56912361	57008229	-	Afap1l2	0.032772	0.0251196	0.0232387	0.0316701	0.0282001
17	13760539	13906151	+	Afdn	0.512613	0.447757	0.47535	0.672489	0.527052
5	103692374	103855323	+	Aff1	0.403519	0.472465	0.470068	0.516289	0.465585
X	69360294	69868038	+	Aff2	0.00331486	0.00342947	0.00374953	0.00641457	0.00422711
1	38177326	38664956	-	Aff3	0.00494728	0.00547035	0.00498407	0.00803764	0.00585984
11	53350833	53421831	+	Aff4	0.759392	0.703945	0.674364	0.808625	0.736582
10	42312585	42478566	-	Afg1l	0.123374	0.130355	0.133978	0.181591	0.142325
8	123477903	123503917	+	Afg3l1	1.61102	1.88989	1.96663	2.60587	2.01835
18	67404764	67449173	-	Afg3l2	1.83436	2.05981	2.08877	2.86027	2.2108
11	117825924	117839909	+	Afmid	0.442566	0.139988	0.274457	0.491468	0.33712
11	20685084	20741590	-	Aftph	0.183682	0.171783	0.174195	0.222741	0.1881
8	53511727	53523422	+	Aga	0.738771	0.70011	0.751593	1.06204	0.813129
1	89454806	89897618	+	Agap1	0.117196	0.124329	0.128523	0.161813	0.132965
10	127075284	127093170	+	Agap2	0.715171	1.08126	1.1029	0.956772	0.964026
5	24452177	24502048	+	Agap3	0.904476	0.901125	1.00959	1.30394	1.02978
2	90782727	90834438	+	Agbl2	0.0119343	0.0207773	0.0156664	0.0128103	0.0152971
6	34780432	34859460	+	Agbl3	0.0134884	0.00703208	0.00512557	0.00838225	0.00850707
5	30888694	30906966	+	Agbl5	0.411082	0.414292	0.458666	0.544246	0.457072
17	34597862	34600937	+	Ager	0.237185	0.108435	0.0922096	0.233377	0.167802
1	82839483	82901183	+	Agfg1	0.284608	0.240186	0.253411	0.329248	0.276863
5	137650463	137684727	-	Agfg2	0.276718	0.428184	0.446866	0.597718	0.437372
13	95350683	95375353	-	Aggf1	0.807324	0.874032	0.809469	1.07184	0.890666
6	40325172	40396763	+	Agk	0.0603741	0.0712104	0.0584216	0.0866202	0.0691566
3	116739999	116808167	-	Agl	2.8147	2.53047	2.45409	3.23027	2.75738
4	141746672	141759264	+	Agmat	0.0133664	0.023538	0.0160842	0.0482235	0.025303
12	37241641	37582203	+	Agmo	0.000823688	0.00130544	0.000475759	0.000972558	0.000894361
4	126435012	126468584	-	Ago1	0.613703	0.62356	0.651883	0.871233	0.690095
15	73095844	73184936	-	Ago2	0.869295	0.859217	0.82514	1.13494	0.922148
4	126331704	126429557	-	Ago3	0.161901	0.14664	0.134119	0.191266	0.158481
4	126489541	126533473	-	Ago4	0.266903	0.252153	0.23696	0.262619	0.254659
17	34604262	34613450	+	Agpat1	7.15643	7.12875	7.52058	8.93866	7.6861
2	26593057	26604418	-	Agpat2	2.2469	2.1259	2.19565	2.5404	2.27721
10	78269178	78352490	-	Agpat3	1.93704	1.99626	2.05615	2.5676	2.13926
17	12118704	12219646	+	Agpat4	0.0283457	0.0322986	0.0208667	0.035	0.0291278
8	18846277	18891362	+	Agpat5	0.11666	0.0860776	0.103919	0.150296	0.114238
2	75832177	75931351	+	Agps	0.086553	0.0795711	0.0841381	0.121326	0.092897
4	156165290	156197489	-	Agrn	2.30519	2.23104	2.35374	3.17684	2.5167
8	105566698	105637394	-	Agrp	0.000911023	0.00367144	0.00413474	0.00546593	0.00354578
8	124556534	124569707	-	Agt	0.102215	0.120936	0.138373	0.155052	0.129144
13	59445742	59585228	-	Agtpbp1	0.572352	0.605324	0.589112	0.699304	0.616523
13	30336441	30382868	+	Agtr1a	0.202947	0.261744	0.256507	0.280609	0.250452
4	148077061	148088032	-	Agtrap	3.38021	3.56946	3.48906	5.17259	3.90283
1	179744894	179803681	-	Ahctf1	0.275928	0.272929	0.28979	0.310454	0.287275
2	155059310	155074498	-	Ahcy	0.153974	0.25037	0.202041	0.284822	0.222802
3	107663118	107696561	-	Ahcyl1	1.2565	1.33824	1.26329	1.67707	1.38377
6	29768011	29912311	+	Ahcyl2	0.0952552	0.0878079	0.0842128	0.111324	0.09465
4	133011260	133078111	+	Ahdc1	0.997007	0.85624	0.945232	1.2469	1.01134
10	20952547	21080430	+	Ahi1	0.010529	0.0130369	0.0114028	0.0176983	0.0131667
19	8989284	9076915	+	Ahnak	12.2853	11.9986	11.5028	14.6506	12.6093
12	112772194	112802658	-	Ahnak2	0.434624	0.374574	0.409531	0.61429	0.458255
12	35497974	35535039	-	Ahr	0.205856	0.160929	0.167206	0.233828	0.191955
13	74211118	74292332	-	Ahrr	0.0158886	0.0127732	0.0179554	0.0231104	0.0174319
12	87266479	87273999	+	Ahsa1	6.35151	5.87041	5.95364	7.89142	6.51675
11	23487882	23498031	-	Ahsa2	0.89615	0.857352	0.815761	1.16097	0.932558
16	22891277	22899450	+	Ahsg	0.178476	0.194922	0.252681	0.121265	0.186836
1	183296590	183325477	+	Aida	0.340225	0.398733	0.359487	0.424211	0.380664
17	35170991	35176069	-	Aif1	0.243063	0.269949	0.207398	0.358741	0.269788
2	31950139	31973443	+	Aif1l	0.0385193	0.0429246	0.0469307	0.0829083	0.0528207
X	48474944	48513564	-	Aifm1	0.897771	0.801984	0.816001	1.09919	0.903736
10	61715263	61739261	+	Aifm2	0.761471	0.812948	0.803102	1.14251	0.880008
10	13647054	13868981	-	Aig1	0.0677506	0.0672772	0.0651601	0.0897961	0.072496
1	173350879	173466041	+	Aim2	0.00487169	0.00450394	0.0031656	0.00527283	0.00445351
3	132660481	132684371	-	Aimp1	0.728028	0.821869	0.920673	1.06812	0.884672
5	143902704	143909848	-	Aimp2	1.97901	1.74233	1.74176	2.21055	1.91841
19	4114446	4125859	-	Aip	2.29565	2.37622	2.50569	3.18746	2.59125
17	12741311	12860137	+	Airn	0.151087	0.122533	0.126129	0.191402	0.147788
2	25575416	25581758	-	Ajm1	0.0707705	0.0408926	0.044709	0.0261129	0.0456213
14	54567472	54577559	-	Ajuba	0.634062	0.595013	0.693666	0.744282	0.666756
2	32621758	32635059	+	Ak1	30.3564	31.7745	32.1594	43.895	34.5463
4	128991958	129011530	+	Ak2	1.24119	1.15091	1.28936	1.87845	1.38998
19	29020833	29047962	-	Ak3	1.70134	1.75564	1.63447	1.89766	1.74728
2	72633936	72634608	+	Ak3l2-ps	7.37921	7.01189	5.24923	5.46627	6.27665
4	101419277	101466996	+	Ak4	0.371066	0.318955	0.32334	0.49681	0.377543
3	152462815	152668361	-	Ak5	0	0.00126172	0	0.00187996	0.00078542
13	100650979	100666360	+	Ak6	0.797708	0.75137	0.76552	0.804352	0.779737
11	88830792	88864587	-	Akap1	3.03469	3.19564	3.26975	4.66511	3.5413
11	61871307	61930253	-	Akap10	0.105647	0.111248	0.115446	0.148903	0.120311
14	78492246	78536809	-	Akap11	0.409164	0.419015	0.433578	0.535143	0.449225
10	4266380	4359471	+	Akap12	0.798536	0.626824	0.583933	1.05554	0.766208
7	75455534	75754610	+	Akap13	0.569145	0.541843	0.553672	0.699182	0.59096
X	36608314	36645396	-	Akap17b	0.0347979	0.0309722	0.0349551	0.049126	0.0374628
12	76324891	76334154	+	Akap5	0.526934	0.635944	0.677803	1.02503	0.716428
12	52699383	53155600	+	Akap6	0.401759	0.388416	0.373796	0.491508	0.41387
10	25169090	25307871	-	Akap7	0.0582132	0.0662056	0.0598339	0.0731894	0.0643605
17	32303672	32321239	-	Akap8	2.23877	2.23554	2.24126	3.3718	2.52184
17	32321424	32350608	-	Akap8l	1.59367	1.25806	1.34771	2.01071	1.55254
5	3928054	4081311	+	Akap9	0.478459	0.419666	0.399892	0.522646	0.455166
7	109703690	109712190	+	Akip1	0.250815	0.300749	0.204915	0.344205	0.275171
4	123734559	123750346	-	Akirin1	0.394468	0.466158	0.412301	0.663314	0.48406
11	85216597	85217055	+	Akirin1-ps	0	0.421108	0.115796	0.858836	0.348935
4	34550937	34566909	+	Akirin2	0.182656	0.162372	0.159773	0.210829	0.178907
4	63367125	63403355	-	Akna	0.334483	0.299621	0.355535	0.507383	0.374255
1	87067672	87071099	+	Akp-ps1	0.0491129	0.118919	0.141837	0.0483245	0.0895483
4	116636510	116651681	-	Akr1a1	5.2106	5.861	5.83662	7.55383	6.11551
6	34384218	34396951	+	Akr1b10	1.51204	1.62667	1.51167	2.09332	1.68593
6	34302434	34317479	-	Akr1b3	3.34227	3.11621	3.15083	3.99239	3.40043
6	34354119	34368464	+	Akr1b8	0.0615541	0.0968915	0.083863	0.138164	0.0951182
13	4191150	4205597	+	Akr1c13	0.0116502	0.00512892	0.014019	0.0267473	0.0143864
13	4049011	4090689	+	Akr1c14	0.0363451	0.0515578	0.0417912	0.0410596	0.0426884
13	4228700	4252844	+	Akr1c19	0.016548	0.0268134	0.00841979	0.0380486	0.0224574
13	4590750	4609175	-	Akr1e1	0.328855	0.317704	0.342958	0.413458	0.350744
4	139310744	139318427	+	Akr7a5	3.35904	3.22121	3.16332	4.69184	3.60885
12	112653821	112674885	-	Akt1	7.69477	8.0996	8.62379	12.3181	9.18407
7	44848991	44855422	+	Akt1s1	3.99554	4.23776	4.63689	6.04995	4.73003
7	27591552	27640827	+	Akt2	2.49895	2.42641	2.45198	3.70601	2.77084
11	16514533	16515982	+	Akt2-ps	28.583	27.1239	28.6188	35.2284	29.8885
1	177020073	177258204	-	Akt3	0.0530098	0.0539866	0.0491593	0.0535495	0.0524263
8	91111784	91199977	-	Aktip	0.21075	0.236213	0.239388	0.235547	0.230474
4	62509169	62519919	-	Alad	5.27628	5.00419	5.68224	7.51784	5.87014
9	106233455	106248655	-	Alas1	9.03927	6.63221	6.63275	13.2337	8.88448
X	150547375	150570639	+	Alas2	0.191461	0.379431	0.434642	0.543185	0.38718
16	52248996	52454075	-	Alcam	0.0035564	0.00144525	0.00316025	0.00323013	0.00284801
7	45140684	45154585	-	Aldh16a1	0.597644	0.699724	0.68772	0.920635	0.726431
19	40550257	40588464	-	Aldh18a1	0.160056	0.132847	0.161148	0.184939	0.159748
19	20492715	20643466	+	Aldh1a1	0.0352739	0.0565251	0.0446037	0.0391817	0.0438961
9	71215789	71296244	+	Aldh1a2	0.0167358	0.022564	0.0281941	0.0644964	0.0329976
7	66390890	66427518	-	Aldh1a3	0.0291024	0.0242757	0.0210118	0.0165783	0.022742
4	45799022	45804605	+	Aldh1b1	1.93945	1.96425	1.92991	2.95641	2.19751
6	90486427	90600204	+	Aldh1l1	0.0142999	0.0290389	0.0270614	0.0411187	0.0278797
10	83487450	83534141	-	Aldh1l2	0.159499	0.109789	0.0984825	0.119568	0.121835
5	121566027	121593825	-	Aldh2	6.81161	6.28539	6.73943	7.87787	6.92858
11	61207537	61218422	+	Aldh3a1	0.0309251	0.0136146	0.0260491	0.0405716	0.0277901
11	61223417	61267465	-	Aldh3a2	0.377011	0.41298	0.487386	0.553931	0.457827
19	3913491	3929809	-	Aldh3b1	0.0928294	0.0878958	0.0965874	0.175145	0.113114
4	139622866	139649691	+	Aldh4a1	3.71683	3.37618	3.59475	4.65447	3.83556
13	24907579	24937662	-	Aldh5a1	0.911915	0.806509	0.825355	1.17915	0.930732
12	84430717	84451005	-	Aldh6a1	3.06837	3.03752	3.02839	3.62956	3.19096
18	56509687	56572952	-	Aldh7a1	0.337332	0.35959	0.334279	0.34692	0.34453
1	167349991	167368533	+	Aldh9a1	1.20727	1.16289	1.02675	1.62851	1.25636
7	126795234	126809109	-	Aldoa	142.616	127.824	135.505	165.68	142.906
9	79346321	79346627	-	Aldoa-ps3	19.4691	14.7397	16.6458	24.817	18.9179
9	79346774	79347527	+	Aldoa-ps4	11.6755	11.2416	8.86417	20.0656	12.9617
4	72850583	72852635	-	Aldoart1	49.0351	48.525	47.6904	76.298	55.3871
12	55565239	55566897	+	Aldoart2	4.00808	3.78552	4.04061	6.42942	4.56591
4	49535995	49549547	-	Aldob	0.0496783	0.11482	0.071735	0.126275	0.0906271
16	5233621	5244913	+	Alg1	0.769945	0.749514	0.786933	1.0262	0.833148
15	90224311	90233472	+	Alg10b	1.65352	1.37098	1.48566	2.08494	1.64878
8	22060721	22071628	+	Alg11	0.329203	0.315901	0.360238	0.318857	0.33105
15	88805244	88819319	-	Alg12	0.406575	0.405364	0.446074	0.600072	0.464521
X	144317804	144374451	+	Alg13	0.01452	0.0117725	0.0143013	0.0146176	0.0138029
3	121291773	121363095	+	Alg14	0.0715825	0.0607765	0.0584975	0.0843652	0.0688054
4	47465067	47474334	-	Alg2	0.690167	0.535721	0.511411	0.601648	0.584737
16	20605374	20611736	-	Alg3	1.07643	1.31503	1.19243	1.60051	1.2961
3	54735539	54751319	+	Alg5	0.209765	0.19487	0.189954	0.206398	0.200247
4	99715664	99763461	+	Alg6	0.03648	0.0271365	0.0297402	0.0369954	0.032588
7	97371606	97392186	+	Alg8	0.0845094	0.0792102	0.0885708	0.0858351	0.0845314
9	50775019	50843543	+	Alg9	0.0842713	0.0809311	0.0766398	0.103792	0.0864086
12	30884322	30893855	+	Alkal2	0.00588517	0.0272046	0.0297435	0.0173721	0.0200513
12	87425840	87444018	-	Alkbh1	0.24673	0.237414	0.205824	0.332978	0.255737
5	114123926	114128219	-	Alkbh2	0.0360444	0.136567	0.123778	0.218057	0.128612
2	93980550	94010808	-	Alkbh3	0.58777	0.644599	0.614464	0.773546	0.655095
2	93980034	93983576	+	Alkbh3os1	0.0791973	0.104598	0.0686161	0.155852	0.102066
5	136136146	136141616	+	Alkbh4	0.379493	0.643442	0.651656	0.746801	0.605348
11	60536381	60558513	+	Alkbh5	4.25109	3.94392	4.27173	5.57963	4.51159
7	30308717	30314305	+	Alkbh6	1.52608	1.71718	1.9704	2.05479	1.81711
17	56997339	56999323	+	Alkbh7	7.4371	7.07737	8.10535	10.6844	8.32606
9	3335140	3391155	+	Alkbh8	0.0671057	0.0787075	0.0665283	0.0985499	0.0777229
6	85587531	85702754	+	Alms1	0.0202692	0.0139244	0.0113898	0.0188799	0.0161158
6	85774393	85804058	+	Alms1-ps2	0.00816229	0.00711181	0.00622359	0.023432	0.0112324
11	70241457	70255354	-	Alox12	0.254336	0.255931	0.259413	0.647481	0.35429
6	116410077	116461179	-	Alox5	0.225063	0.225474	0.236212	0.311111	0.249465
5	149264767	149288154	+	Alox5ap	0.13634	0.169505	0.207674	0.231187	0.186176
3	127670310	127780528	-	Alpk1	0.0183248	0.040673	0.0499816	0.0390663	0.0370114
18	65265529	65394067	-	Alpk2	1.79212	1.58412	1.55539	2.26317	1.7987
7	81057600	81105613	+	Alpk3	5.89276	5.1615	5.26187	7.26179	5.89448
4	137741733	137796385	-	Alpl	0.487614	0.418944	0.44396	0.683821	0.508585
1	59162926	59237232	-	Als2	0.164563	0.171992	0.158632	0.251759	0.186736
9	110879870	110900531	+	Als2cl	1.16997	1.16281	1.22197	1.68585	1.31015
2	93642384	93681340	+	Alx4	0.0403248	0.0427968	0.0384725	0.055265	0.0442148
11	120592121	120598366	-	Alyref	2.13788	1.92564	1.76213	2.36693	2.04814
1	171503478	171504751	+	Alyref2	1.12051	1.39944	1.32364	1.9378	1.44535
15	10981756	10996627	+	Amacr	0.879032	0.864495	0.942453	1.33264	1.00466
2	91730134	91918850	+	Ambra1	0.17332	0.174136	0.169352	0.237817	0.188656
18	64448685	64449690	-	Amd-ps3	0.00223474	0.736127	0.0374244	1.11437	0.472539
10	40287458	40302189	-	Amd1	2.38976	3.19468	2.9001	3.10574	2.89757
10	35708675	35711893	-	Amd2	1.26352	2.03312	2.28207	1.44123	1.75499
10	93523338	93540034	-	Amdhd1	0.00672057	0.0155331	0.00242611	0	0.00616994
17	24155833	24163767	-	Amdhd2	0.643484	0.770487	0.806656	1.02279	0.810854
X	95420318	95444873	-	Amer1	0.333581	0.319867	0.331573	0.418151	0.350793
8	93971588	94012843	-	Amfr	2.2833	2.36365	2.35644	3.08295	2.52158
3	108186335	108192287	+	Amigo1	3.64785	3.76589	3.9676	5.4535	4.20871
15	97244125	97247288	-	Amigo2	0.74497	0.901914	0.883636	1.2915	0.955505
9	108053159	108055702	+	Amigo3	1.27959	1.03439	1.03536	2.64834	1.49942
X	142851146	142966729	-	Ammecr1	0.052908	0.0634665	0.0567733	0.0730732	0.0615552
18	31759826	31782744	+	Ammecr1l	0.468938	0.716116	0.643191	0.720104	0.637087
6	149157147	149188713	-	Amn1	0.0693161	0.0915479	0.0808434	0.0647057	0.0766033
X	145446425	145505182	-	Amot	0.100258	0.104039	0.0992718	0.108043	0.102903
9	14541966	14645057	-	Amotl1	1.09329	1.14704	1.18544	1.52824	1.2385
9	102716672	102733419	+	Amotl2	3.94301	3.07062	3.21449	3.91268	3.5352
3	108074062	108086652	-	Ampd2	0.668428	0.623855	0.723903	1.06985	0.771509
7	110768206	110812406	+	Ampd3	0.878745	1.01258	1.0112	1.33563	1.05954
13	18948205	19150922	+	Amph	0.00442811	0.00310694	0.00439598	0.00435703	0.00407202
9	108296853	108302303	+	Amt	0.916183	0.876934	0.929046	1.27625	0.999603
3	113555710	113606700	-	Amy1	0.0187348	0.0136881	0.0153591	0.0270651	0.0187118
5	140724127	140761440	+	Amz1	0.0585511	0.047436	0.0436247	0.0779043	0.056879
11	109425946	109452814	+	Amz2	1.03827	0.958827	1.05566	1.10998	1.04068
2	128610104	128687392	-	Anapc1	0.461671	0.44149	0.466446	0.589252	0.489715
8	79711820	79779060	+	Anapc10	0.0100036	0.0100442	0.0149973	0.0110715	0.0115291
11	120598421	120608199	+	Anapc11	2.53607	2.47042	2.9081	4.17774	3.02308
9	102626296	102634426	+	Anapc13	5.43296	5.30595	5.09209	6.71301	5.636
7	101863715	101901850	+	Anapc15	0.0835981	0.123099	0.121744	0.169823	0.124566
10	95672991	95673452	-	Anapc15-ps	2.12374	3.4454	2.53425	2.97601	2.76985
10	59987409	60003136	-	Anapc16	1.00599	1.16609	1.1925	1.37243	1.18425
2	25272478	25285916	+	Anapc2	2.10001	2.28557	2.23662	2.61677	2.30974
5	52834012	52867798	+	Anapc4	0.340413	0.367351	0.371662	0.488534	0.39199
5	122787459	122821340	-	Anapc5	2.89133	3.02799	3.17648	4.18293	3.31968
5	122421693	122444913	+	Anapc7	0.852908	1.00963	1.07633	1.3242	1.06577
14	51091150	51102010	+	Ang	0.154694	0.183948	0.227833	0.19982	0.191574
12	86700502	86726461	-	Angel1	0.26367	0.259751	0.221576	0.310474	0.263868
1	190925112	190946963	+	Angel2	0.682966	0.70703	0.624635	0.778107	0.698184
15	42424723	42676978	-	Angpt1	0.0375751	0.0443849	0.0408631	0.0788106	0.0504084
8	18690263	18741563	-	Angpt2	0.0809288	0.062109	0.064747	0.0817818	0.0723917
2	151911210	151945338	+	Angpt4	0.00493173	0.00434233	0.00712137	0.00323504	0.00490762
1	156838562	156861079	+	Angptl1	0.0770225	0.0444249	0.0521688	0.0710964	0.0611782
2	33216069	33247718	+	Angptl2	3.09861	3.04007	3.06783	5.21002	3.60413
4	99030954	99046112	+	Angptl3	0.0518173	0.0195534	0.0160337	0.0473437	0.033687
17	33773750	33781831	-	Angptl4	1.13859	0.42179	0.461154	0.122961	0.536124
9	20873808	20879728	-	Angptl6	0.238161	0.267462	0.372554	0.356833	0.308752
4	148495183	148500461	-	Angptl7	0.531483	0.407129	0.360705	0.355607	0.413731
9	21835510	21837348	+	Angptl8	0.274717	0.241885	0.595034	0.720819	0.458114
15	27466677	27594910	+	Ank	0.987017	1.01582	0.993135	1.27254	1.06713
8	22974844	23150498	+	Ank1	1.28434	1.40276	1.35275	1.89512	1.48374
3	126921612	127499351	-	Ank2	0.294822	0.273749	0.284522	0.340729	0.298455
10	69398773	70027439	+	Ank3	0.129758	0.126587	0.125643	0.156476	0.134616
13	96416134	96471268	-	Ankdd1b	0.00511855	0.00748551	0.00587766	0.00623964	0.00618034
11	72690006	72772147	+	Ankfy1	0.305307	0.293175	0.292428	0.406589	0.324375
18	36559987	36658914	+	Ankhd1	0.279643	0.212652	0.21053	0.272331	0.243789
5	3690000	3802926	-	Ankib1	0.0839618	0.0908781	0.10187	0.116344	0.0982635
8	71406010	71409905	+	Ankle1	0.0720197	0.0475594	0.0415983	0.0708636	0.0580102
5	110231004	110256652	+	Ankle2	0.667047	0.573177	0.544653	0.72306	0.626984
1	92859803	92902907	-	Ankmy1	0.00624618	0.00792592	0.0043418	0.00626811	0.0061955
12	36157114	36197292	+	Ankmy2	0.20387	0.17889	0.201635	0.208841	0.198309
13	98263074	98274755	+	Ankra2	0.643596	0.577251	0.589512	0.860105	0.667616
19	36111961	36120100	-	Ankrd1	83.9478	101.048	98.9274	50.9315	83.7137
8	11611583	11635758	-	Ankrd10	0.779762	0.945566	1.01036	1.28559	1.00532
8	122883822	123042278	-	Ankrd11	1.18503	1.14449	1.16517	1.5792	1.26847
17	65965698	66077090	-	Ankrd12	0.205591	0.185758	0.191562	0.218274	0.200296
5	114774677	114806201	+	Ankrd13a	0.816867	0.859114	0.893023	1.13999	0.927249
11	77470485	77489679	-	Ankrd13b	0.622591	0.633113	0.69642	0.825561	0.694421
3	157947239	158008035	+	Ankrd13c	0.104278	0.121269	0.122593	0.165256	0.128349
19	4270180	4283138	-	Ankrd13d	0.0606148	0.0543237	0.0593935	0.0894626	0.0659486
2	11777876	11790330	+	Ankrd16	0.88295	0.892454	0.910694	0.952994	0.909773
5	90227166	90366578	-	Ankrd17	0.845905	0.802833	0.795522	0.990315	0.858644
1	36530188	36536884	-	Ankrd23	32.6201	39.2777	40.0508	36.6797	37.1571
10	81628540	81647611	+	Ankrd24	0.476574	0.431274	0.473647	0.532605	0.478525
6	118501308	118562227	-	Ankrd26	0.0469685	0.0766286	0.0558534	0.0842734	0.065931
7	35586244	35639227	+	Ankrd27	0.20119	0.240544	0.257642	0.264641	0.241004
14	31698768	31830652	-	Ankrd28	0.0944387	0.0941079	0.0995122	0.121804	0.102466
18	12252362	12305798	-	Ankrd29	0.0356972	0.0235732	0.0325955	0.0444217	0.0340719
15	31291478	31367727	-	Ankrd33b	0.342143	0.326519	0.314493	0.473483	0.364159
3	96596636	96599776	+	Ankrd34a	0.964835	0.825927	0.735307	0.984507	0.877644
3	96670131	96691033	+	Ankrd35	0.048314	0.0514024	0.0636002	0.0971379	0.0651136
8	45996902	46005708	-	Ankrd37	0.131027	0.217277	0.267693	0.275823	0.222955
1	36537507	36547446	-	Ankrd39	0.539314	0.299137	0.402062	0.676754	0.479317
11	94328001	94341842	+	Ankrd40	9.09589	9.71379	9.76298	11.9251	10.1244
7	92581723	92637143	-	Ankrd42	0.00610268	0.0101753	0.0105951	0.0112164	0.00952237
1	54645340	54926388	-	Ankrd44	0.0245981	0.0251783	0.0267477	0.0316795	0.0270509
1	161142691	161170499	+	Ankrd45	0.0181577	0.0226492	0.0160231	0.013896	0.0176815
15	36477668	36496821	-	Ankrd46	1.07795	0.959438	0.966501	1.27681	1.07017
9	14779618	14784857	-	Ankrd49	0.48511	0.41016	0.364876	0.433472	0.423405
3	38449259	38484845	-	Ankrd50	0.972736	0.932827	0.982323	1.23169	1.02989
10	128377115	128408705	+	Ankrd52	3.33472	2.94187	3.02749	4.31616	3.40506
6	83762644	83768327	+	Ankrd53	0.0394885	0.0195577	0.0142553	0.0388546	0.028039
15	79053094	79062894	-	Ankrd54	0.463711	0.483902	0.537329	0.698483	0.545856
13	112288451	112384003	+	Ankrd55	0.0035229	0.000775468	0.00254352	0.0023109	0.0022882
4	32804035	32950842	-	Ankrd6	0.00726099	0.0116087	0.00717381	0.0109046	0.00923702
5	143890741	143897686	-	Ankrd61	0.167554	0.156301	0.188439	0.182056	0.173588
2	118699103	118703964	-	Ankrd63	0.357787	0.381081	0.441645	0.261194	0.360427
12	110975353	110979041	-	Ankrd9	8.47331	10.3873	11.8509	10.6274	10.3347
17	27909306	28062776	+	Anks1	0.505481	0.511033	0.563748	0.867461	0.611931
10	89873509	90973301	+	Anks1b	0.000204051	0.000235809	0.000110493	0.000451744	0.000250524
16	4941436	4964206	-	Anks3	0.416402	0.423042	0.441176	0.640031	0.480163
4	47015669	47057428	-	Anks6	0.0510531	0.0665403	0.0620802	0.113686	0.0733399
1	75192151	75199388	+	Ankzf1	1.89169	1.81853	2.02774	2.65082	2.0972
9	22332012	22389189	-	Anln	0.0186432	0.0116634	0.0106298	0.0212404	0.0155442
7	144588549	144751975	-	Ano1	0.0587035	0.062796	0.0671694	0.081406	0.0675187
9	122175874	122294424	-	Ano10	0.259339	0.285014	0.314004	0.41117	0.317382
2	110655201	110950924	-	Ano3	0.000758863	0.000375846	0.000136974	0.00149336	0.000691261
10	88948994	89344763	-	Ano4	0.00935601	0.0102037	0.00910902	0.015343	0.0110029
7	51511029	51598710	+	Ano5	0.004479	0.00380286	0.00323382	0.0044071	0.0039807
15	95790843	95974752	+	Ano6	0.158193	0.167764	0.176374	0.179977	0.170577
8	71476019	71485964	-	Ano8	1.36521	1.51912	1.65737	2.37145	1.72829
11	33394879	33395267	-	Anp32-ps	2.101	2.85076	1.09863	2.39004	2.11011
9	62341293	62378813	+	Anp32a	1.86533	1.90098	1.88656	2.65597	2.07721
4	46450902	46472658	+	Anp32b	1.85536	1.75763	1.55662	2.36459	1.88355
4	143389659	143390417	+	Anp32b-ps1	4.84951	3.70675	3.46656	6.05073	4.51839
3	95929246	95947391	+	Anp32e	2.56941	2.46447	2.59848	3.70553	2.83447
7	79821803	79861060	-	Anpep	0.413018	0.294449	0.287879	0.486542	0.370472
6	87133853	87335822	-	Antxr1	0.0466674	0.0317347	0.0314875	0.0631375	0.0432568
5	97882783	98031044	-	Antxr2	0.270184	0.263133	0.267472	0.390207	0.297749
19	20373428	20390945	-	Anxa1	0.29786	0.209387	0.205804	0.283624	0.249169
14	25842156	25886805	+	Anxa11	1.19941	1.16459	1.17991	1.67648	1.3051
14	25856777	25870267	-	Anxa11os	0.101426	0.0811871	0.0671953	0.124785	0.0936483
15	58341363	58389384	-	Anxa13	0.00233662	0.00925813	0.00421757	0.00689732	0.00567741
9	69453620	69491796	+	Anxa2	1.05223	0.941358	0.889146	1.40936	1.07302
5	96793339	96845967	+	Anxa3	0.150311	0.134459	0.14162	0.17517	0.15039
6	86736840	86793585	-	Anxa4	0.156213	0.167795	0.168464	0.217699	0.177543
3	36448923	36475895	-	Anxa5	1.20227	1.27607	1.30356	1.58003	1.34048
11	54979108	55033446	-	Anxa6	2.58536	2.33455	2.36234	3.17373	2.614
14	20455260	20480134	-	Anxa7	1.50893	1.51626	1.50632	1.8864	1.60448
14	34085981	34100572	+	Anxa8	0.0230704	0.033009	0.0194328	0.0151334	0.0226614
3	95296096	95307177	-	Anxa9	0.109962	0.077085	0.0600747	0.0697444	0.0792165
13	20794113	21036618	+	Aoah	0.00485833	0.0042777	0.00467693	0.00455271	0.00459142
11	101325063	101329703	+	Aoc2	0.236421	0.429221	0.446106	0.429482	0.385307
11	101330605	101341939	+	Aoc3	1.41791	1.80519	1.565	1.79675	1.64621
13	62964893	63326097	+	Aopep	0.112005	0.104977	0.114382	0.164417	0.123945
1	58029931	58106414	+	Aox1	0.432056	0.385102	0.377083	0.328402	0.380661
1	58113130	58200699	+	Aox3	0.00768811	0.00550005	0.00508822	0.00441274	0.00567228
3	127807007	127837524	-	Ap1ar	0.499995	0.531701	0.4924	0.589707	0.528451
11	4986824	5042792	+	Ap1b1	0.915207	0.883716	0.891651	1.21318	0.975938
8	109778554	109864205	+	Ap1g1	0.325597	0.271824	0.273918	0.340577	0.302979
14	55098575	55106594	-	Ap1g2	0.568108	0.553337	0.697214	0.746339	0.64125
8	72240018	72257386	+	Ap1m1	1.71528	1.56574	1.76551	2.22171	1.81706
5	137034993	137046136	-	Ap1s1	1.15802	1.20027	1.27957	1.68932	1.3318
X	163909017	163933667	+	Ap1s2	0.050072	0.0586167	0.0723035	0.0604654	0.0603644
7	44900373	44929497	-	Ap2a1	1.95247	1.93467	2.10763	2.64766	2.16061
7	141562173	141633012	+	Ap2a2	0.806546	0.799556	0.839308	1.17532	0.905183
11	83299024	83405036	+	Ap2b1	0.329126	0.335417	0.360105	0.459519	0.371042
16	20535478	20544910	+	Ap2m1	9.26298	9.1872	9.43256	11.546	9.85719
2	49308155	49309463	+	Ap2m1-ps	22.7049	25.6643	26.2597	32.4716	26.7751
7	16738410	16749295	+	Ap2s1	1.42771	1.38188	1.589	2.17565	1.64356
13	94358960	94566318	+	Ap3b1	0.122024	0.108096	0.114081	0.141629	0.121457
10	80706956	80742265	-	Ap3d1	2.0799	1.81418	1.93992	2.84386	2.16946
14	21031442	21052509	-	Ap3m1	0.528888	0.606902	0.568211	0.555993	0.564998
10	82585426	82586684	+	Ap3m1-ps	0.923473	0.802534	0.628015	0.698025	0.763012
8	22787354	22805623	-	Ap3m2	0.196541	0.20888	0.206201	0.293101	0.226181
18	46741876	46790827	+	Ap3s1	0.0162051	0.0208323	0.0244826	0.0180614	0.0198953
8	94405211	94405790	+	Ap3s1-ps2	0.27674	0.716988	0.764217	0.532693	0.572659
7	79875325	79920650	-	Ap3s2	0.544633	0.605695	0.571259	0.728323	0.612478
3	103809520	103822026	+	Ap4b1	0.780584	0.727308	0.738588	1.10794	0.838605
2	127008717	127067910	+	Ap4e1	0.0663463	0.0719782	0.0800643	0.110045	0.0821084
5	138172002	138180430	+	Ap4m1	1.44235	1.53466	1.48375	1.7717	1.55811
12	51691033	51744787	+	Ap4s1	0.222309	0.188848	0.208733	0.184851	0.201185
19	5568025	5571262	+	Ap5b1	0.849263	1.06442	1.03862	1.26197	1.05357
14	49066097	49094235	+	Ap5m1	0.194413	0.193423	0.195623	0.248771	0.208057
2	131207078	131213515	+	Ap5s1	2.5973	3.05046	2.79398	3.97919	3.10523
5	142463944	142478711	+	Ap5z1	0.516696	0.564499	0.562322	0.781294	0.606203
10	90989311	91082771	-	Apaf1	0.0546266	0.059462	0.0494086	0.0543403	0.0544594
19	23758887	23949597	+	Apba1	0.0484414	0.0398248	0.0401068	0.0656693	0.0485106
7	64501706	64753879	+	Apba2	0.00400463	0.00323219	0.00497951	0.00678615	0.00475062
10	81266960	81273247	+	Apba3	6.07706	5.38023	6.42355	7.97265	6.46337
7	105558483	105581654	-	Apbb1	2.47248	2.56373	2.64825	3.50486	2.79733
2	22774094	22875654	+	Apbb1ip	0.0458505	0.0379388	0.0315085	0.0548983	0.042549
5	66298703	66618785	-	Apbb2	0.145481	0.138434	0.12617	0.183675	0.14844
18	36671154	36679367	-	Apbb3	1.37259	1.20562	1.07923	1.67018	1.3319
18	34220924	34322553	+	Apc	0.549695	0.537239	0.535954	0.575183	0.549518
5	76196625	76197095	+	Apc-ps1	0.387161	0.73247	0.372684	0.3609	0.463304
10	80295977	80318264	+	Apc2	0.473255	0.422236	0.44165	0.673716	0.502714
18	62922231	62961180	+	Apcdd1	0.0792237	0.120804	0.115438	0.092125	0.101898
9	108085413	108094607	-	Apeh	3.10601	2.88121	3.00472	3.9868	3.24469
14	50924968	50927140	+	Apex1	3.37429	3.48539	3.44692	3.73459	3.5103
X	150519519	150589869	-	Apex2	0.0810313	0.102846	0.0966989	0.0934456	0.0935055
3	95893969	95898289	+	Aph1a	9.26024	11.1573	11.1126	15.2014	11.6829
9	66775202	66795491	-	Aph1b	0.118913	0.12912	0.138131	0.18978	0.143986
9	66814994	66834727	-	Aph1c	0.076755	0.0474815	0.0283534	0.0398609	0.0481127
2	94411682	94438137	-	Api5	0.243836	0.309896	0.277005	0.389987	0.305181
2	103073675	103092645	+	Apip	0.700922	0.654258	0.691835	0.843901	0.722729
6	87628424	87672194	-	Aplf	0.0256355	0.0465543	0.0481227	0.0479256	0.0420595
X	48025146	48034854	-	Apln	1.16737	0.873935	0.959669	1.40452	1.10137
2	85136225	85139924	+	Aplnr	8.38745	7.56198	7.70924	17.804	10.3657
7	30434982	30445536	-	Aplp1	0.106317	0.08776	0.130492	0.20922	0.133447
9	31149557	31211816	-	Aplp2	4.70933	4.62905	4.67534	5.6294	4.91078
2	150583080	150608568	-	Apmap	0.477653	0.543562	0.598985	0.744824	0.591256
1	171225054	171226380	+	Apoa2	0.211551	0.223522	0.213835	0.249786	0.224674
6	122577792	122602445	-	Apobec1	0.104683	0.132247	0.111728	0.154504	0.12579
17	48419231	48432931	-	Apobec2	5.8888	6.54978	6.27702	8.69947	6.85377
15	79891659	79915907	+	Apobec3	0.24401	0.24974	0.237111	0.338454	0.267329
7	126584942	126589113	+	Apobr	0.403524	0.346416	0.329157	0.661744	0.43521
16	31296192	31314809	-	Apod	0.105474	0.123383	0.095734	0.136398	0.115247
7	19696109	19699189	-	Apoe	53.8811	54.9359	58.6555	56.8696	56.0855
15	77583819	77596126	-	Apol10b	0.223374	0.320081	0.242361	0.566374	0.338048
15	77633946	77643287	-	Apol11b	1.27003e-43	0.0344034	0.014586	0.0212181	0.0175519
15	77044729	77057107	+	Apol6	0.027195	0.026938	0.0163622	0.0579767	0.032118
15	77403789	77411136	-	Apol9a	0	0.0252135	0.0181731	0.0556813	0.024767
6	134981718	134986837	+	Apold1	1.3919	1.38236	1.36894	1.47739	1.40515
X	94367117	94417094	+	Apoo	0.089923	0.105606	0.114066	0.112787	0.105596
13	107414144	107414730	-	Apoo-ps	10.2342	10.3391	9.83381	11.3876	10.4487
X	112311334	112372756	+	Apool	0.122397	0.113399	0.0850725	0.0835833	0.101113
12	111713261	111755054	+	Apopt1	0.275847	0.275572	0.272104	0.35906	0.295646
16	84949685	85173767	-	App	0.57389	0.55716	0.577904	0.734847	0.61095
11	85187262	85235131	-	Appbp2	0.311754	0.301845	0.299081	0.351726	0.316101
11	85234775	85238305	+	Appbp2os	0.047713	0.0209925	0.0752298	0.0156541	0.0398973
14	26918988	26971233	-	Appl1	0.187924	0.197849	0.18715	0.260983	0.208477
10	83600033	83648739	-	Appl2	0.724531	0.666339	0.666983	0.963379	0.755308
8	122574635	122576910	-	Aprt	5.54868	4.511	5.09183	8.05491	5.80161
8	71223949	71224454	+	Aprt-ps	0.77767	0.146728	0.242404	0.769913	0.484179
4	40682382	40703195	-	Aptx	0.431294	0.503762	0.482659	0.620642	0.509589
6	55336432	55348556	+	Aqp1	27.464	27.6918	28.4219	23.9543	26.883
7	97724006	97738290	-	Aqp11	0.106048	0.0778117	0.113431	0.0811577	0.0946121
18	15389496	15410983	-	Aqp4	0.0522207	0.0586241	0.0490141	0.0796428	0.0598754
4	41033074	41048140	-	Aqp7	0.956986	1.43856	1.42762	1.42532	1.31212
7	123462291	123468005	+	Aqp8	0.0294557	0.155612	0.0638007	0.241524	0.122598
2	114101170	114187025	-	Aqr	0.192119	0.197208	0.190636	0.273264	0.213307
X	98148769	98323216	+	Ar	0.0292662	0.0239987	0.0232199	0.0379733	0.0286145
X	20797814	20860520	+	Araf	0.598557	0.588469	0.618842	0.820478	0.656586
7	101348067	101412587	+	Arap1	0.429985	0.412183	0.405244	0.73469	0.495525
5	62602445	62766160	-	Arap2	0.0370055	0.0404052	0.0326596	0.0382157	0.0370715
18	37972628	37998970	-	Arap3	3.10313	2.60335	2.94009	4.252	3.22464
15	74669083	74672571	-	Arc	6.59472	9.67642	10.8582	8.9578	9.02178
9	44741564	44767846	-	Arcn1	1.35934	1.39357	1.26151	1.64481	1.41481
12	84918148	84970901	-	Arel1	0.873118	1.01196	0.961334	1.11396	0.990093
11	59211412	59228271	-	Arf1	6.16746	6.66493	6.76494	8.90485	7.12554
11	103966739	103985338	+	Arf2	0.597262	0.661337	0.670784	0.869641	0.699756
15	98736634	98763215	-	Arf3	1.08488	1.07044	1.08805	1.51397	1.18934
14	26638074	26665085	+	Arf4	0.443983	0.395043	0.4529	0.574615	0.466635
6	28423560	28426603	+	Arf5	13.3298	13.8795	15.0151	16.9254	14.7874
12	69372150	69373784	+	Arf6	6.96791	7.79697	8.49153	11.7143	8.74268
2	180967225	180982527	+	Arfgap1	1.58022	1.60039	1.79475	2.48199	1.86434
2	91264974	91276932	+	Arfgap2	2.95775	2.95631	2.94142	4.12567	3.24529
15	83299739	83350248	-	Arfgap3	0.13107	0.138633	0.149967	0.186891	0.15164
1	10137571	10232671	-	Arfgef1	0.356324	0.345165	0.340748	0.453347	0.373896
2	166805588	166898053	+	Arfgef2	0.73599	0.671937	0.696515	0.946859	0.762825
3	84496093	84582626	-	Arfip1	0.0198655	0.0385219	0.0296717	0.0260886	0.0285369
7	105634203	105640417	-	Arfip2	1.92329	1.92181	1.88839	2.51321	2.06168
2	181357690	181365405	-	Arfrp1	2.83379	2.63329	2.79403	3.51431	2.94386
8	8665075	8690522	-	Arglu1	1.54109	1.33799	1.3578	1.83959	1.51912
2	91649860	91672327	+	Arhgap1	1.21204	1.17923	1.10802	1.42265	1.23049
8	77250366	77517954	-	Arhgap10	0.155112	0.141136	0.139031	0.179823	0.153776
2	113831492	113848662	-	Arhgap11a	0.163376	0.148885	0.167499	0.192904	0.168166
18	6024427	6136099	-	Arhgap12	0.0582777	0.0690069	0.0631144	0.0697004	0.0650248
2	43748824	44395954	+	Arhgap15	0.000346783	0.000343505	0.000250375	0.000597127	0.000384448
7	123279218	123369916	-	Arhgap17	0.162685	0.151548	0.163905	0.205113	0.170813
10	26753421	26918649	+	Arhgap18	0.0465185	0.0493301	0.0492761	0.0624767	0.0519003
19	41766588	41802048	-	Arhgap19	0.0490469	0.048061	0.0445501	0.0576001	0.0498145
9	51765337	51853857	+	Arhgap20	0.339079	0.365368	0.335869	0.313057	0.338343
9	51832814	51875887	-	Arhgap20os	0.00651259	0.00346653	0.00389237	0	0.00346787
2	20847919	20968882	-	Arhgap21	0.720752	0.718531	0.745069	0.905421	0.772443
14	33214026	33369935	+	Arhgap22	0.0066451	0.00605957	0.00759703	0.0148705	0.00879305
11	97415533	97502403	+	Arhgap23	0.300755	0.290326	0.341729	0.408694	0.335376
5	102481391	102897938	+	Arhgap24	0.0299004	0.0353991	0.0358826	0.0320709	0.0333133
6	87458545	87533260	-	Arhgap25	0.0277832	0.0436363	0.0504195	0.0524579	0.0435742
18	38676718	39376285	+	Arhgap26	0.11067	0.106407	0.106592	0.130273	0.113486
11	103331497	103363693	-	Arhgap27	0.438549	0.572797	0.588775	0.631715	0.557959
11	103355701	103361093	+	Arhgap27os2	0.0450562	0.0108099	0.0151672	0.0442205	0.0288135
11	103344753	103350125	+	Arhgap27os3	0.0939929	0.10345	0.173426	0.133588	0.126114
17	67842713	68004121	-	Arhgap28	0.0135559	0.0114767	0.0080306	0.0184684	0.0128829
3	121952541	122016754	+	Arhgap29	0.567908	0.478304	0.451031	0.646479	0.53593
1	171388954	171410299	+	Arhgap30	0.197735	0.215228	0.199258	0.364656	0.244219
16	38598340	38713275	-	Arhgap31	0.736102	0.790069	0.771817	1.03888	0.834217
9	32116136	32268447	+	Arhgap32	0.222114	0.233272	0.228978	0.26059	0.236238
7	30522226	30535061	-	Arhgap33	0.104907	0.118348	0.126237	0.133329	0.120705
7	16493719	16614994	-	Arhgap35	0.74527	0.757624	0.738485	0.98411	0.806372
15	76723985	76818171	-	Arhgap39	0.100072	0.0975527	0.0890241	0.101396	0.0970112
X	73891442	73921871	-	Arhgap4	0.0765341	0.0754643	0.06789	0.107979	0.0819668
9	8994329	9239102	-	Arhgap42	0.017878	0.0174064	0.0183689	0.01714	0.0176983
11	65002039	65162962	-	Arhgap44	0.213713	0.200758	0.233338	0.349898	0.249427
10	80016653	80031473	+	Arhgap45	0.529991	0.452484	0.502913	0.826923	0.578078
12	52503972	52571976	+	Arhgap5	0.04785	0.0593835	0.0565865	0.0576347	0.0553637
X	168795099	169304436	+	Arhgap6	0.00649884	0.00705534	0.00644174	0.00910404	0.00727499
15	84720052	84772208	+	Arhgap8	0.0118325	0.00852414	0.0139795	0.0190515	0.0133469
10	127321964	127329944	+	Arhgap9	0.189823	0.184441	0.263951	0.366635	0.251213
11	120578104	120581625	-	Arhgdia	38.8314	36.2816	39.803	50.5603	41.3691
6	136923655	136941900	-	Arhgdib	0.661124	0.741177	0.65494	0.892563	0.737451
17	26199183	26207787	-	Arhgdig	0.0195618	0.0344479	0.0141236	0.00641594	0.0186373
7	24902912	24926595	+	Arhgef1	2.38078	2.28397	2.55185	3.48703	2.67591
8	14911663	15001086	+	Arhgef10	0.275951	0.310388	0.301939	0.380815	0.317273
4	140514485	140666013	-	Arhgef10l	0.299533	0.285089	0.316505	0.410938	0.328016
3	87617559	87738035	+	Arhgef11	0.330419	0.355407	0.376013	0.453591	0.378858
9	42963842	43107240	-	Arhgef12	1.77957	1.79	1.8707	2.27448	1.92869
11	68943155	68957481	-	Arhgef15	5.26728	5.31448	5.36911	7.78372	5.93365
4	154278486	154301677	-	Arhgef16	0.0241919	0.017573	0.0209597	0.0357053	0.0246075
7	100869752	100932108	-	Arhgef17	1.82106	1.56619	1.74093	2.45045	1.89466
8	3353415	3456602	+	Arhgef18	0.18486	0.19173	0.199809	0.259464	0.208966
4	141239499	141257565	+	Arhgef19	1.81049	1.45603	1.61882	2.80199	1.92183
3	88605966	88648053	+	Arhgef2	1.32637	1.12947	1.1328	1.83366	1.35557
10	127182525	127190084	-	Arhgef25	1.92231	1.70564	1.74158	2.85544	2.05624
3	62338344	62462222	+	Arhgef26	0.0108694	0.0107667	0.00883212	0.0129227	0.0108477
13	97899469	98206440	-	Arhgef28	0.0182764	0.0197934	0.023488	0.0276939	0.0223129
14	27114899	27403912	+	Arhgef3	0.0624599	0.0600782	0.0550396	0.0867031	0.0660702
18	61491657	61536595	-	Arhgef37	0.03246	0.0807952	0.077519	0.0589641	0.0624346
4	43496142	43499696	-	Arhgef39	0.142074	0.104245	0.136769	0.248521	0.157902
1	34678188	34813310	+	Arhgef4	0.00655711	0.00417411	0.00605959	0.0047847	0.00539388
14	51984719	52006252	+	Arhgef40	1.52687	1.22181	1.21383	1.84175	1.45107
6	43265582	43289321	+	Arhgef5	1.35183	1.29535	1.30534	1.67864	1.40779
X	57231485	57338730	-	Arhgef6	0.235933	0.232839	0.209623	0.231115	0.227377
8	11727721	11835220	+	Arhgef7	0.945677	0.932951	0.962746	1.30844	1.03745
X	95048935	95196857	-	Arhgef9	0.0830616	0.0836541	0.0744834	0.0947898	0.0839972
4	133679008	133756770	-	Arid1a	1.64711	1.5694	1.5287	1.98548	1.68267
17	4994332	5347657	+	Arid1b	0.193879	0.175215	0.183314	0.244671	0.19927
15	96287518	96404993	+	Arid2	0.294665	0.275007	0.256193	0.326118	0.287996
10	79927043	79955019	+	Arid3a	0.078211	0.120512	0.0825301	0.159831	0.110271
9	57790353	57836794	-	Arid3b	0.115973	0.079776	0.0836825	0.125998	0.101357
12	71015990	71098593	+	Arid4a	0.26081	0.254308	0.242735	0.314764	0.268154
13	14063232	14199604	+	Arid4b	0.129839	0.120755	0.11209	0.149722	0.128102
1	36307733	36324030	+	Arid5a	0.636873	0.48195	0.494617	0.636811	0.562563
10	68092520	68278741	-	Arid5b	0.250357	0.235755	0.240793	0.206024	0.233232
9	59388258	59486619	-	Arih1	0.224731	0.19737	0.208789	0.249184	0.220018
9	108602942	108649387	-	Arih2	0.393968	0.506372	0.450735	0.633536	0.496153
10	88730858	88744095	+	Arl1	1.41287	1.39575	1.42737	2.07116	1.57679
13	54575015	54581129	+	Arl10	0.376225	0.375699	0.510139	0.514647	0.444178
14	61309753	61311937	+	Arl11	0.282572	0.152673	0.204016	0.202208	0.210367
16	62793685	62847041	-	Arl13b	0.0799133	0.0701312	0.0683255	0.0724228	0.0726982
2	106962527	106974425	-	Arl14ep	0.315929	0.330069	0.272357	0.55212	0.367619
13	113794505	114157462	+	Arl15	0.00927438	0.00959502	0.00970929	0.0120152	0.0101485
11	120464866	120467608	-	Arl16	0.900272	0.999857	0.930672	1.20794	1.00969
19	6134374	6141549	-	Arl2	4.42571	4.48199	4.84949	6.16233	4.97988
8	94666600	94674426	+	Arl2bp	5.25476	5.42996	5.94707	7.08902	5.9302
19	46531096	46573199	-	Arl3	0.498365	0.464616	0.476053	0.582143	0.505294
12	40005447	40038026	-	Arl4a	0.125711	0.12964	0.115629	0.0745547	0.111384
1	88673125	88702222	-	Arl4c	0.158108	0.169347	0.174014	0.301654	0.200781
11	101665541	101667833	+	Arl4d	2.79048	4.60685	4.63031	6.55111	4.64469
2	52397951	52424902	-	Arl5a	0.505848	0.485259	0.428345	0.456762	0.469054
2	15049395	15082457	+	Arl5b	0.0695735	0.0941291	0.0931124	0.086823	0.0859095
11	97989578	97996182	-	Arl5c	0.135926	0.123421	0.147207	0.133744	0.135074
16	59612949	59639392	-	Arl6	0.0487984	0.0476367	0.0551461	0.102293	0.0634685
7	118118891	118129663	-	Arl6ip1	0.541659	0.471192	0.507646	0.532963	0.513365
5	124116089	124118197	+	Arl6ip4	6.62702	7.89131	8.22425	10.763	8.37639
6	97210689	97233316	+	Arl6ip5	2.17203	1.96648	1.99963	2.78124	2.22985
2	53191726	53219221	+	Arl6ip6	0.0714172	0.074111	0.117858	0.12448	0.0969665
1	135146824	135156270	+	Arl8a	2.38168	2.7259	2.6501	3.372	2.78242
6	108783099	108825279	+	Arl8b	0.375086	0.379447	0.366843	0.569303	0.42267
3	19131402	19163066	-	Armc1	0.221479	0.225821	0.209798	0.305093	0.240548
5	21645813	21662695	+	Armc10	0.126284	0.179955	0.165557	0.173305	0.161275
10	41914990	42018443	-	Armc2	0.0911076	0.114957	0.103368	0.140871	0.112576
7	128237342	128245101	+	Armc5	1.72065	1.61718	1.99809	2.76339	2.02483
8	70220172	70234467	-	Armc6	0.441773	0.469114	0.464692	0.715211	0.522698
11	115475667	115490468	+	Armc7	0.0644387	0.0500625	0.0930489	0.141727	0.0873193
9	99478372	99568900	-	Armc8	0.145638	0.143238	0.158396	0.193912	0.160296
1	86154780	86278285	+	Armc9	0.0226942	0.022256	0.0304149	0.0356856	0.0277627
X	134717963	134721918	+	Armcx1	0.510675	0.374703	0.491607	0.725801	0.525697
X	134804145	134809222	-	Armcx2	1.42551	1.09461	1.03719	1.7397	1.32425
X	134756595	134761456	+	Armcx3	1.98514	1.89016	1.53326	2.35074	1.93983
X	134686519	134696758	+	Armcx4	1.1945	1.3967	1.43606	2.77119	1.69961
X	135742733	135747323	+	Armcx5	0.674012	0.867231	0.753249	0.849227	0.78593
X	134748461	134751418	-	Armcx6	0.198076	0.0992876	0.191779	0.261359	0.187625
19	45817364	45998489	-	Armh3	0.0780568	0.0832215	0.0771182	0.0974717	0.083967
14	49675952	49783384	-	Armh4	0.1128	0.103112	0.0938837	0.172136	0.120483
10	4432467	4455142	+	Armt1	0.242475	0.193484	0.241162	0.265363	0.235621
3	95434388	95497241	+	Arnt	0.677492	0.580021	0.603862	0.787822	0.662299
7	84246278	84410177	-	Arnt2	0.00102691	0.000537448	0.000988569	0.000673619	0.000806636
7	113207465	113314127	+	Arntl	0.00999385	0.00868368	0.00683575	0.0108685	0.00909545
6	146796055	146833530	+	Arntl2	0.0538951	0.0336133	0.0335076	0.0176767	0.0346732
5	145083830	145108762	+	Arpc1a	1.11602	1.18831	1.3316	1.65878	1.32368
5	145114215	145130706	+	Arpc1b	1.65198	1.65854	1.77091	2.67628	1.93943
1	74236084	74268210	+	Arpc2	1.19589	1.3879	1.31489	1.46711	1.34145
5	122391878	122414185	+	Arpc3	1.53921	1.66087	1.64518	1.97232	1.70439
6	113378115	113390449	+	Arpc4	1.60256	1.62681	1.8696	2.23117	1.83254
1	152766542	152775598	+	Arpc5	0.87541	0.969688	1.04596	1.0714	0.990614
2	39005348	39015878	+	Arpc5l	1.42257	1.55161	1.61949	1.95018	1.63596
7	79925361	79935360	-	Arpin	0.976296	0.796628	0.903382	1.4575	1.03345
9	75037614	75060314	+	Arpp19	0.909516	0.935196	0.986785	1.17944	1.00273
9	112065091	112235939	-	Arpp21	0.00131353	0.00477074	0.00355635	0.00775464	0.00434881
7	99535466	99606772	+	Arrb1	0.34383	0.371495	0.359015	0.503208	0.394387
11	70432635	70440829	+	Arrb2	1.15712	1.19175	1.29518	1.61687	1.31523
2	24925352	24935253	-	Arrdc1	0.464647	0.434062	0.482754	0.596575	0.49451
8	70835129	70839721	-	Arrdc2	1.20955	2.16225	2.35523	1.19013	1.72929
13	80883384	80896043	+	Arrdc3	1.01047	0.980435	0.873547	1.26462	1.03227
7	68736995	68749242	-	Arrdc4	0.448937	0.48402	0.367127	0.88346	0.545886
17	56294111	56300287	-	Arrdc5	0.0363364	0.0299941	0.0787041	0.0268148	0.0429624
15	89472476	89477426	-	Arsa	2.21013	2.22292	2.29295	3.28763	2.50341
13	93771630	93943017	+	Arsb	0.0392806	0.0503521	0.0454578	0.0685012	0.0508979
11	109473374	109573331	+	Arsg	0.0101029	0.00852487	0.0129676	0.0138066	0.0113505
18	60911780	60918562	+	Arsi	0.181993	0.120182	0.13737	0.19535	0.158724
3	126363684	126440376	+	Arsj	0.00292616	0.00386004	0.00475352	0.00863757	0.00504432
13	76060422	76098661	-	Arsk	0.0821619	0.0823542	0.064617	0.0534141	0.0706368
7	102101743	102113934	+	Art1	10.1679	11.5945	12.4954	16.0394	12.5743
5	92331827	92414629	+	Art3	1.52451	1.42599	1.37464	1.50538	1.45763
6	136848451	136857734	-	Art4	1.0516	0.993767	0.78543	0.963357	0.948538
7	102096879	102109490	-	Art5	0.947587	1.12812	1.08565	1.23003	1.09785
8	124722139	124734124	+	Arv1	0.177883	0.160745	0.219684	0.285571	0.210971
16	18348182	18407077	+	Arvcf	0.314367	0.349197	0.39051	0.445468	0.374885
X	135993824	135995356	+	Arxes2	0.183105	0.138695	0.0649882	0.118089	0.126219
19	46707458	46741100	+	As3mt	0.64038	0.713619	0.688712	1.13385	0.79414
8	41340197	41374774	-	Asah1	0.215801	0.191796	0.174551	0.245863	0.207003
19	31982597	32108212	-	Asah2	0.0549354	0.0548586	0.0480472	0.0606454	0.0546217
15	64086857	64382920	-	Asap1	0.082621	0.0858447	0.0789431	0.105721	0.0882824
12	20990459	21270172	+	Asap2	0.0636726	0.0655832	0.0664567	0.100716	0.0741071
4	136206365	136245217	+	Asap3	0.405772	0.298473	0.303391	0.538501	0.386534
1	91540544	91559590	+	Asb1	0.574407	0.754748	0.714594	0.941976	0.746431
5	24532697	24540979	-	Asb10	7.68865	8.33835	9.43449	12.6575	9.52975
X	164436994	164459171	+	Asb11	2.20345	2.24863	2.06212	3.14632	2.41513
X	95470201	95557988	-	Asb12	0.0504877	0.0362946	0.0447574	0.0496772	0.0453042
13	3634032	3653823	+	Asb13	0.360018	0.394992	0.388874	0.488124	0.408002
14	26894557	26915259	+	Asb14	1.58537	1.48002	1.42052	1.94924	1.60879
6	24528144	24573165	+	Asb15	0.937109	0.829505	0.794456	0.971115	0.883046
11	102268743	102279463	+	Asb16	0.0732693	0.0345604	0.0491215	0.10299	0.0649853
1	89950220	90014667	-	Asb18	0.321228	0.329977	0.325574	0.445412	0.355548
12	103321142	103356002	-	Asb2	9.41338	8.10166	8.63117	12.0174	9.5409
11	30885416	31102705	+	Asb3	0.00645492	0.0037511	0.00745668	0.0058432	0.00587647
6	5383386	5433023	+	Asb4	0.0384293	0.0268702	0.0212173	0.0478215	0.0335846
8	54529580	54587876	+	Asb5	0.0683298	0.111858	0.100226	0.0946944	0.0937771
2	30823097	30830334	-	Asb6	0.829495	1.07506	1.10263	1.8078	1.20375
7	66644565	66689597	-	Asb7	0.143273	0.142331	0.120533	0.167942	0.14352
15	98134637	98165626	-	Asb8	1.12065	1.2326	1.2679	1.71546	1.33415
10	60002805	60099989	+	Ascc1	0.127581	0.12466	0.131709	0.163591	0.136885
11	4637747	4685700	+	Ascc2	0.443417	0.445021	0.464591	0.605523	0.489638
10	50592669	50851486	+	Ascc3	0.0166912	0.0138852	0.013616	0.0147169	0.0147273
10	53596757	53609226	+	Asf1a	0.107987	0.127802	0.118297	0.189933	0.136005
8	83955507	83970198	+	Asf1b	0.0458267	0.0403499	0.0606589	0.0826669	0.0573756
11	70092644	70106188	+	Asgr2	0	0.0218835	0.00897217	0.020379	0.0128087
3	88950622	89079376	+	Ash1l	0.54454	0.555458	0.556495	0.626238	0.570683
8	25815996	25847695	-	Ash2l	0.465461	0.53997	0.45618	0.684396	0.536502
15	99670368	99701131	+	Asic1	0.0711254	0.0578077	0.0790034	0.0915171	0.0748634
5	24413392	24417836	+	Asic3	0.100996	0.0583576	0.100263	0.124219	0.0959589
5	130011258	130029248	-	Asl	0.215182	0.17299	0.207148	0.300715	0.224009
8	85017931	85025282	-	Asna1	4.45714	4.46037	4.39724	5.33928	4.66351
6	7675169	7693255	-	Asns	0.0279183	0.0348241	0.0291155	0.0610447	0.0382256
1	53344617	53352753	-	Asnsd1	1.29639	1.35705	1.48359	1.75731	1.47358
11	73304992	73329597	-	Aspa	0.0296421	0.0135517	0.0148164	0.0358969	0.0234768
7	44465391	44467759	+	Aspdh	0.0473846	0.0312912	0.0513172	0.209808	0.0849503
12	112106679	112127560	+	Aspg	0.00268681	0.0301628	0.0232784	0.0370115	0.0232849
4	9448069	9669345	-	Asph	0.470579	0.466969	0.46757	0.694357	0.524869
7	126945567	126949583	-	Asphd1	0.0279399	0.0830276	0.0605175	0.0549828	0.0566169
5	112384354	112394867	-	Asphd2	0.0213463	0.0458131	0.0577947	0.052509	0.0443658
1	139454772	139494092	+	Aspm	0.0128416	0.0122491	0.0185431	0.0266748	0.0175771
13	49544443	49567566	+	Aspn	0.0630838	0.0464651	0.0770782	0.0644585	0.0627714
11	120672973	120709448	+	Aspscr1	0.534715	0.516255	0.53083	0.797584	0.594846
19	9109868	9135637	-	Asrgl1	1.28235	1.22206	1.28425	1.67735	1.3665
2	31470207	31520673	+	Ass1	0.0333398	0.0247143	0.0302063	0.0303969	0.0296643
9	105395392	105412230	+	Aste1	0.0966254	0.105615	0.101474	0.239395	0.135777
1	158362273	158691782	+	Astn1	0.00221343	0.00303578	0.00442546	0.0016753	0.00283749
4	65380803	66404612	-	Astn2	0.00197275	0.00242454	0.00217604	0.00172541	0.00207469
2	153345829	153404008	+	Asxl1	0.64031	0.636169	0.643708	0.770451	0.672659
12	3426857	3506853	+	Asxl2	0.250369	0.19166	0.206585	0.229785	0.2196
18	22344246	22530228	+	Asxl3	0.00392158	0.00597618	0.00348476	0.00445226	0.0044587
19	32671638	32739787	-	Atad1	0.393511	0.33434	0.309077	0.333732	0.342665
15	58094044	58135083	-	Atad2	0.0861256	0.0668049	0.0641622	0.0995395	0.0791581
12	4917353	5047395	+	Atad2b	0.0496139	0.0487176	0.0426737	0.0615524	0.0506394
4	155740641	155761094	-	Atad3a	1.7332	1.88197	1.98224	2.66823	2.06641
4	155761178	155769265	+	Atad3aos	0.0416248	0.0183251	0.0350618	0.0341305	0.0322856
11	80089400	80135795	+	Atad5	0.0205573	0.0167696	0.0122231	0.0237968	0.0183367
17	35897595	35910076	-	Atat1	0.465066	0.499936	0.544847	0.636892	0.536685
10	81204508	81230834	-	Atcay	0.11579	0.379252	0.33967	0.411673	0.311596
10	81194609	81210878	+	Atcayos	1.20076	2.32114	2.38295	3.03281	2.23442
7	130391493	130520370	-	Ate1	0.149752	0.146324	0.148979	0.207743	0.163199
15	100227819	100261245	+	Atf1	0.42895	0.3466	0.328054	0.466327	0.392483
X	53883611	53884421	-	Atf1-ps	10.4889	9.98448	9.2659	9.92506	9.91609
2	73816509	73892640	-	Atf2	0.157048	0.174705	0.163875	0.181275	0.169226
1	191170296	191218040	-	Atf3	0.0329024	0.0411273	0.050056	0.0219682	0.0365135
15	80255184	80257542	+	Atf4	10.5164	12.6638	11.8874	14.7019	12.4424
7	44812256	44816659	-	Atf5	16.5224	11.6365	13.2469	19.8629	15.3172
1	170704674	170867772	-	Atf6	0.630525	0.515645	0.504659	0.654927	0.576439
17	34647146	34655075	+	Atf6b	2.10856	1.8737	1.84422	2.72915	2.13891
15	102525946	102625465	-	Atf7	0.542065	0.528758	0.521644	0.629973	0.55561
6	136506167	136610863	+	Atf7ip	0.696628	0.613256	0.606268	0.886857	0.700752
13	90935356	91223969	-	Atg10	0.00583169	0.00539146	0.00673672	0.00994599	0.00697646
15	101284272	101290946	+	Atg101	1.01716	1.41001	1.42628	1.68735	1.3852
18	46730144	46741581	-	Atg12	0.902598	0.997728	0.927924	1.25494	1.0208
2	91674618	91710577	-	Atg13	1.12803	1.1591	1.20982	1.35401	1.21274
14	47540893	47570650	-	Atg14	0.266759	0.244029	0.266803	0.302384	0.269994
1	87755870	87792429	+	Atg16l1	0.616909	0.650599	0.696914	0.927118	0.722885
7	101263034	101302252	-	Atg16l2	0.230319	0.187048	0.197275	0.271664	0.221577
19	6241668	6262336	+	Atg2a	2.4919	2.48628	2.63686	3.53355	2.78715
12	105616136	105685212	-	Atg2b	0.3219	0.327027	0.330943	0.450287	0.357539
16	45158785	45188539	+	Atg3	0.226269	0.204208	0.194677	0.237479	0.215658
X	140956907	141164271	+	Atg4a	0.0128864	0.0101167	0.0117184	0.0166581	0.0128449
3	103643954	103646069	-	Atg4a-ps	0.779095	0.829893	0.613059	0.87242	0.773617
1	93751500	93790611	+	Atg4b	0.378606	0.43749	0.448926	0.595264	0.465071
4	99193934	99259788	+	Atg4c	0.0153348	0.0247539	0.0246037	0.0293391	0.0235079
9	21265293	21277773	+	Atg4d	2.54667	2.93543	3.21882	4.1855	3.22161
10	44268358	44364292	+	Atg5	0.0479546	0.0552252	0.0485566	0.0684754	0.055053
6	114643097	114860615	+	Atg7	0.0611282	0.0764759	0.0761643	0.084764	0.0746331
1	75180860	75192197	-	Atg9a	8.38587	8.66812	8.61987	12.1957	9.46739
5	24384181	24392144	-	Atg9b	0.1481	0.0938891	0.127211	0.256811	0.156503
1	71557150	71579632	+	Atic	0.762113	0.688743	0.72425	0.982063	0.789292
12	69892614	69966418	+	Atl1	0.036042	0.0306164	0.0331154	0.0542547	0.0385071
17	79848390	79896124	-	Atl2	0.228015	0.174634	0.182446	0.202381	0.196869
19	7494040	7539675	+	Atl3	0.271696	0.283909	0.259057	0.325398	0.285015
9	53439149	53536741	-	Atm	0.0580625	0.0584628	0.0514672	0.0740999	0.0605231
8	116943393	116960446	+	Atmin	1.17122	1.24271	1.18766	1.54411	1.28642
6	124742544	124756525	-	Atn1	5.66209	5.34292	5.24358	6.94739	5.79899
6	72206177	72235578	-	Atoh8	0.223261	0.32763	0.389895	0.345475	0.321565
11	55446641	55461240	-	Atox1	0.960738	1.109	1.17921	1.65241	1.22534
7	58656166	58829421	+	Atp10a	0.010686	0.00898125	0.0109884	0.0213476	0.0130008
5	72203329	72298776	+	Atp10d	0.0581918	0.0826781	0.0785114	0.0763435	0.0739312
8	12757014	12868729	+	Atp11a	0.968924	0.958774	0.994639	1.416	1.08458
3	35754106	35856277	+	Atp11b	0.0521657	0.0409755	0.0436102	0.0540297	0.0476953
X	60223290	60592699	-	Atp11c	0.00197435	0.00351022	0.00230269	0.00328757	0.00276871
8	69791163	69807750	+	Atp13a1	1.56604	1.32676	1.49698	1.97022	1.59
4	140986873	141007331	+	Atp13a2	0.888527	0.780526	0.889009	1.22235	0.945103
16	30312423	30405976	-	Atp13a3	0.160718	0.152863	0.166697	0.200033	0.170078
3	101576219	101604685	-	Atp1a1	25.3157	22.0306	22.0015	35.2515	26.1498
1	172271709	172298065	-	Atp1a2	29.2596	27.0881	27.4892	37.1533	30.2476
7	24978167	25005959	-	Atp1a3	0.0141308	0.0119976	0.0145767	0.0317805	0.0181214
1	164437109	164458356	-	Atp1b1	6.28281	6.17187	6.29951	8.23946	6.74841
11	69599736	69605943	-	Atp1b2	2.9647	2.76359	2.8714	3.84205	3.11044
9	96332655	96364443	-	Atp1b3	0.405907	0.397607	0.405817	0.565828	0.44379
10	126868427	126901356	-	Atp23	0.0460017	0.0506299	0.0492045	0.0620274	0.0519659
7	126445858	126463109	-	Atp2a1	0.0398114	0.030566	0.0303481	0.0386666	0.034848
5	122453513	122502226	-	Atp2a2	135.839	125.846	127.681	185.458	143.706
11	72961169	72993045	+	Atp2a3	0.432893	0.471892	0.517152	0.819154	0.560273
10	98914406	99026144	+	Atp2b1	0.338916	0.317055	0.320105	0.408262	0.346085
6	113743831	114042614	-	Atp2b2	0.000563319	0.00099199	0.000677856	0.000739034	0.00074305
1	133699457	133801042	-	Atp2b4	0.301545	0.310365	0.313411	0.390715	0.329009
9	105403539	105527320	-	Atp2c1	0.135974	0.149654	0.159962	0.151621	0.149303
18	77773729	77782870	+	Atp5a1	254.298	252.344	259.476	332.606	274.681
10	128083273	128090392	+	Atp5b	324.406	328.489	333.342	430	354.059
2	10056016	10080511	-	Atp5c1	13.6216	14.1516	14.4785	16.7546	14.7516
13	77669087	77670476	-	Atp5c1-ps	10.7099	9.96186	15.342	8.39749	11.1028
10	80138632	80145819	+	Atp5d	58.2734	54.8836	63.8827	76.2283	63.317
2	174461072	174464106	-	Atp5e	56.6404	57.2578	68.4751	88.1707	67.636
11	96068852	96075671	-	Atp5g1	72.2216	67.9078	73.1144	92.0238	76.3169
15	102662864	102672353	-	Atp5g2	0.362052	0.284442	0.372604	0.318624	0.33443
2	73908447	73911327	-	Atp5g3	143.528	133.72	172.447	184.717	158.603
11	115415689	115419963	-	Atp5h	41.7873	42.7842	40.5961	47.3074	43.1187
16	84827866	84835626	-	Atp5j	14.4784	13.9834	15.0584	18.4984	15.5047
5	145183698	145192063	-	Atp5j2	47.8302	48.8273	48.9565	66.38	52.9985
5	108433244	108434449	-	Atp5k	172.294	167.656	171.777	212.662	181.097
2	173984482	173984692	-	Atp5k-ps2	284.087	258.119	228.155	336.723	276.771
9	44912557	44920743	-	Atp5l	8.24515	7.94063	8.38202	6.95457	7.88059
19	47083464	47090648	-	Atp5md	10.3288	11.9418	11.4634	13.0975	11.7079
12	111961375	111966978	-	Atp5mpl	5.14674	5.40224	4.83646	4.70943	5.02372
16	91684398	91931688	-	Atp5o	1.11823	1.13735	1.15446	1.44949	1.21488
3	105942698	105960100	-	Atp5pb	12.5117	11.9448	12.7259	15.9883	13.2927
11	55118101	55118796	-	Atp5pb-ps	118.65	131.817	120.949	129.507	125.231
X	74297097	74304722	+	Atp6ap1	9.01332	8.74103	8.25005	10.2659	9.06758
X	12587801	12617050	+	Atp6ap2	0.151532	0.1368	0.11633	0.184959	0.147405
11	101009452	101063720	+	Atp6v0a1	1.37601	1.29099	1.3622	1.94287	1.49302
5	124628576	124724456	+	Atp6v0a2	0.352841	0.396067	0.36966	0.572296	0.422716
6	38048483	38124587	-	Atp6v0a4	0.00221158	0.000486817	0.00059164	0.00457186	0.00196547
4	117884326	117887334	-	Atp6v0b	12.9254	11.8364	12.7391	16.5718	13.5182
17	24163866	24169703	-	Atp6v0c	20.8985	19.8159	22.7682	25.2738	22.1891
6	37806086	37806551	+	Atp6v0c-ps2	14.0844	14.4207	18.8208	30.9397	19.5664
8	105524465	105566048	-	Atp6v0d1	0.557216	0.536357	0.522122	0.708902	0.581149
17	26663231	26699648	+	Atp6v0e	0.437525	0.460859	0.437132	0.495683	0.4578
6	48537615	48541802	+	Atp6v0e2	1.70173	1.48655	1.53821	1.74033	1.61671
16	44085402	44139706	-	Atp6v1a	0.141966	0.155801	0.15549	0.238784	0.17301
8	69088646	69113712	+	Atp6v1b2	1.1594	1.15879	1.12149	1.58786	1.25689
15	38661933	38692447	+	Atp6v1c1	0.39714	0.369103	0.378329	0.484837	0.407352
12	78840725	78861639	-	Atp6v1d	1.25813	1.30558	1.29959	1.59162	1.36373
6	120794305	120822794	-	Atp6v1e1	1.26823	1.25884	1.27822	1.60246	1.35194
6	29467718	29470513	+	Atp6v1f	11.8002	11.4754	12.5586	14.0558	12.4725
4	63544772	63550751	+	Atp6v1g1	3.69017	3.96343	3.30775	5.31709	4.06961
17	35233660	35238768	+	Atp6v1g2	0.389466	0.435185	0.446852	0.469125	0.435157
1	5070018	5162530	+	Atp6v1h	0.0618573	0.064076	0.0656775	0.0906997	0.0705776
X	106027276	106124927	+	Atp7a	0.0310246	0.0250404	0.0248884	0.035049	0.0290006
5	67618140	67847435	-	Atp8a1	0.0814659	0.0988786	0.0957363	0.105406	0.0953717
14	59638540	60197180	-	Atp8a2	0.00968484	0.00722031	0.0079037	0.0109686	0.00894436
18	64528967	64661268	-	Atp8b1	0.036045	0.0274433	0.0352094	0.0567461	0.0388609
3	89939481	89963509	-	Atp8b2	0.838235	0.716983	0.775468	1.10507	0.858939
2	126320973	126500675	-	Atp8b4	0.00156101	0.00123701	0.00202868	0.0030719	0.00197465
4	43267159	43373834	+	Atp8b5	0.00473335	0.00625149	0.00303774	0.00465736	0.00466998
2	168634438	168742410	-	Atp9a	0.617295	0.567545	0.617883	0.877848	0.670143
18	80734141	80934061	-	Atp9b	0.0937302	0.0921028	0.100091	0.128398	0.103581
4	115784812	115822656	+	Atpaf1	0.206367	0.237994	0.25058	0.247272	0.235553
11	60400626	60418458	-	Atpaf2	0.821164	0.901704	0.929066	1.21662	0.967138
4	132530555	132533660	-	Atpif1	27.3988	24.5356	24.2471	28.7012	26.2207
15	31601852	31621228	+	Atpsckmt	0.463281	0.426397	0.407656	0.723653	0.505247
9	95857597	95951782	+	Atr	0.0256139	0.0271419	0.0239318	0.0363388	0.0282566
5	31048312	31054624	+	Atraid	1.80436	1.86401	1.86994	2.32338	1.96542
9	109057933	109074125	-	Atrip	0.454704	0.668235	0.588889	0.804963	0.629198
2	130906495	131030334	+	Atrn	0.260947	0.254293	0.245317	0.342791	0.275837
19	57611034	58133344	+	Atrnl1	0.0331909	0.0354662	0.0375353	0.0497798	0.0389931
X	105797615	105929404	-	Atrx	0.277135	0.253291	0.234514	0.30075	0.266423
13	45549755	45965009	-	Atxn1	0.0978456	0.0908622	0.0876852	0.117762	0.0985388
15	85336245	85463213	+	Atxn10	0.155096	0.135685	0.152495	0.192606	0.158971
8	109726451	109737740	-	Atxn1l	2.01274	2.37934	2.24976	3.05133	2.42329
5	121711337	121816494	+	Atxn2	0.968495	0.877974	0.846604	1.15554	0.962153
7	126491708	126503438	-	Atxn2l	7.71001	7.04021	7.23111	9.3934	7.84368
12	101918901	101958247	-	Atxn3	0.108368	0.137476	0.135893	0.15854	0.135069
14	13961440	14107303	+	Atxn7	0.187315	0.168654	0.154124	0.21572	0.181453
12	33147693	33373186	+	Atxn7l1	0.0763707	0.0681434	0.0644015	0.0851807	0.0735241
12	33193994	33228855	-	Atxn7l1os1	0.00482803	0.00106276	0.00464776	0.00316702	0.00342639
12	33358243	33394761	-	Atxn7l1os2	0.0016095	0.00431508	0.0105222	0.00159049	0.00450932
3	108202222	108210935	-	Atxn7l2	0.379903	0.357178	0.283586	0.494182	0.378712
11	102289300	102296632	-	Atxn7l3	2.56337	2.79431	3.13798	3.77202	3.06692
10	112925430	112929002	-	Atxn7l3b	3.73813	3.68828	3.60175	4.48174	3.87748
13	52835119	52929682	-	Auh	0.399285	0.427834	0.427069	0.517801	0.442997
4	134510999	134523928	+	Aunip	0.00867868	0.00573111	0.0156649	0.0170787	0.0117883
6	83054521	83057809	+	Aup1	9.90551	9.22585	9.64101	12.1858	10.2395
2	172356190	172370536	-	Aurka	0.0351966	0.0542328	0.0367059	0.0577193	0.0459637
4	155831272	155833131	+	Aurkaip1	15.8441	15.3855	16.2985	23.5182	17.7616
11	69045647	69051665	+	Aurkb	0.121194	0.0923448	0.107694	0.22015	0.135346
5	131437333	132543345	-	Auts2	0.0353558	0.0315548	0.0328149	0.0475156	0.0368103
2	112492964	112634574	+	Aven	0.0451508	0.0457384	0.038308	0.0607839	0.0474953
10	127000709	127020995	+	Avil	0.035953	0.0383092	0.0462637	0.0598302	0.045089
6	56714899	56761913	+	Avl9	0.0632466	0.0567386	0.053418	0.0927599	0.0665408
19	42123273	42129060	-	Avpi1	0.649546	0.697825	0.909941	1.32593	0.89581
10	122448499	122453453	+	Avpr1a	0.158548	0.0747855	0.155353	0.111431	0.125029
17	26138688	26195812	+	Axin1	0.290711	0.307421	0.324057	0.460957	0.345786
11	108920349	108950784	+	Axin2	0.14875	0.135121	0.127768	0.230351	0.160497
7	25757273	25788706	-	Axl	3.03426	2.64962	2.72035	3.41229	2.95413
9	118040499	118069795	+	Azi2	0.55728	0.55391	0.637405	0.76503	0.628406
15	38487427	38519267	-	Azin1	0.570901	0.472418	0.470894	0.593703	0.526979
4	128930233	128962443	-	Azin2	0.0226434	0.0276054	0.0238939	0.0445598	0.0296756
18	82336250	82361601	-	B020010K11Rik	0.151425	0.138326	0.164611	0.10383	0.139548
6	87830274	87832867	-	B130021K23Rik	0.0649094	0.114304	0.124971	0.0212891	0.0813684
7	70364910	70489973	+	B130024G19Rik	0.00823787	0.00994406	0.00832008	0.0150312	0.0103833
16	87495999	87504034	+	B130034C11Rik	0.0349119	0.0737747	0.0403299	0.048092	0.0492771
15	98807024	98816078	+	B130046B21Rik	0.655194	0.731817	0.686495	0.957583	0.757772
7	127448636	127460361	+	B130055M24Rik	0.0616167	0.0875048	0.118073	0.161265	0.107115
4	154336127	154349919	+	B230104I21Rik	0.0156265	0.0116384	0.00979351	0.0132397	0.0125745
14	15437623	15452446	+	B230110C06Rik	0.117629	0.118326	0.0993351	0.157464	0.123189
2	101560781	101649533	-	B230118H07Rik	0.134013	0.150279	0.149699	0.208988	0.160745
7	141359141	141365111	-	B230206H07Rik	0.0174651	0.0525269	0.0252412	0.0761784	0.0428529
11	94133485	94155777	+	B230206L02Rik	0.010067	0.00830987	0.0145366	0.0222871	0.0138001
1	98031116	98057681	-	B230216N24Rik	0.0190073	0.0165145	0.0106736	0.0145462	0.0151854
11	97840780	97844100	+	B230217C12Rik	0.202783	0.0892741	0.0610036	0.332546	0.171402
19	57323193	57360776	-	B230217O12Rik	0.0121068	0.00197157	0.00431114	0.0132194	0.00790223
13	55693124	55703501	+	B230219D22Rik	1.93553	2.04577	1.99077	2.74497	2.17926
5	146188620	146194810	-	B230303O12Rik	0.163144	0.161602	0.17014	0.249705	0.186148
16	97997315	98031802	+	B230307C23Rik	0.0130144	0.0193256	0.0187919	0.0175958	0.0171819
2	180370491	180385886	-	B230312C02Rik	0.142126	0.110701	0.0815653	0.161359	0.123938
6	83441755	83448323	+	B230319C09Rik	0.128129	0.101534	0.080174	0.201715	0.127888
7	35555367	35556936	+	B230322F03Rik	0.287817	0.0629954	0.178079	0.0432516	0.143036
17	45433598	45442545	+	B230354K17Rik	0.31353	0.434434	0.420937	0.493598	0.415625
15	27503912	27505533	+	B230362B09Rik	1.03831	0.891364	0.649701	1.32813	0.976876
1	178313328	178318550	-	B230369F24Rik	0.35454	0.333453	0.232706	0.454561	0.343815
5	134176346	134177710	+	B230377A18Rik	0	0.167032	0.252501	0.216154	0.158922
3	94959034	94962049	-	B230398E01Rik	0.0517828	0.090807	0.0838295	0.0282587	0.0636695
2	122147686	122153084	+	B2m	21.9612	19.5539	19.7654	22.304	20.8961
4	141546189	141547893	+	B330016D10Rik	0.987735	1.36976	1.35497	1.65219	1.34116
3	69574158	69598961	-	B3galnt1	0.0316674	0.0492928	0.0359287	0.0645437	0.0453581
13	13954469	13999104	+	B3galnt2	0.260829	0.244846	0.266231	0.376169	0.287019
2	67565871	68122690	+	B3galt1	0.000503784	0.000199609	0.00036373	0.000495697	0.000390705
1	143640664	143654615	+	B3galt2	0.333756	0.263306	0.226389	0.167386	0.247709
17	33949909	33951489	-	B3galt4	0.852203	1.00829	1.07675	1.22284	1.04002
4	155989466	155992650	-	B3galt6	0.493371	0.395621	0.470708	0.658826	0.504632
1	23761753	23849159	+	B3gat2	0.00602006	0.00834744	0.00344626	0.00784235	0.00641403
19	8920374	8927237	+	B3gat3	3.49062	3.2444	3.55309	4.77785	3.76649
5	149678230	149762600	+	B3glct	0.0345783	0.0544511	0.050891	0.0621578	0.0505195
11	22759738	22860962	-	B3gnt2	0.0391047	0.0308528	0.0481101	0.0620741	0.0450354
8	71690756	71701790	-	B3gnt3	0.193214	0.204819	0.198237	0.290172	0.22161
5	123510460	123511883	+	B3gnt4	0.00375402	0.142023	0.00070757	0.228528	0.0937531
7	25626654	25635101	+	B3gnt8	1.43154	1.59103	1.81376	1.99964	1.70899
8	105252638	105255154	-	B3gnt9	1.16188	1.13988	1.39335	1.14793	1.21076
11	121616197	121673154	-	B3gntl1	0.0845369	0.0995424	0.0772295	0.141381	0.100672
8	41017468	41024217	+	B430010I23Rik	0.366949	0.16013	0.194196	0.197173	0.229612
12	17924294	17925669	+	B430203G13Rik	0.285617	0.242501	0.294592	0.321179	0.285972
18	67321209	67344104	-	B430212C06Rik	0.0300107	0.0418451	0.0387225	0.0363321	0.0367276
13	118386630	118388125	+	B430218F22Rik	0.971812	0.699452	1.70401	1.39917	1.19361
10	7780185	7781358	+	B430219N15Rik	0.189729	0.335662	0.30294	0.777535	0.401467
3	61362250	61365952	-	B430305J03Rik	0.00863167	1.60725e-05	0.235334	0.205722	0.112426
17	48316141	48327025	+	B430306N03Rik	0.0103093	0.00680793	0.00744329	0.0507191	0.0188199
7	110766677	110769346	-	B430319F04Rik	0.541977	0.415784	0.423465	0.447175	0.4571
10	127165225	127172331	+	B4galnt1	0.146672	0.164126	0.149763	0.323641	0.196051
7	141061104	141072401	+	B4galnt4	0.0198649	0.00655904	0	0.0244325	0.0127141
4	40804602	40854006	-	B4galt1	0.953906	0.902146	0.839578	1.41013	1.02644
4	117869260	117883488	-	B4galt2	0.314244	0.333707	0.414169	0.446314	0.377108
1	171270328	171276897	+	B4galt3	1.59838	1.44504	1.83029	2.16795	1.76042
16	38742264	38769050	+	B4galt4	0.240868	0.301524	0.252541	0.313253	0.277046
2	167298444	167349184	-	B4galt5	0.309597	0.292067	0.301762	0.525481	0.357227
18	20684599	20746405	-	B4galt6	0.195163	0.158251	0.144183	0.267948	0.191386
13	55599896	55610444	+	B4galt7	0.648638	0.645168	0.743797	0.857567	0.723792
19	5038826	5041132	+	B4gat1	8.61906	7.97701	10.207	11.8605	9.66589
16	23175280	23224447	+	B630019A10Rik	0.00305621	0.00150803	0.00482891	0.00785932	0.00431312
X	8892382	8894965	+	B630019K06Rik	0.195482	0.114746	0.173679	0.192344	0.169063
1	171500568	171504112	-	B930036N10Rik	0.0726524	0.064185	0.0272018	5.86458e-25	0.0410098
12	110590512	110592701	+	B930059L03Rik	0.230667	0.16925	0.222054	0.403492	0.256366
7	133116534	133120272	-	B930086L07Rik	0.0300178	0.0594683	0.0541819	0.162448	0.076529
18	31609512	31610752	+	B930094E09Rik	0.453144	0.358247	0.776687	0.362829	0.487727
14	121248706	121253972	+	B930095G15Rik	0.500732	0.60505	0.646133	0.429797	0.545428
11	61505144	61512932	+	B9d1	0.30256	0.347272	0.332872	0.326056	0.32719
7	25680780	25686559	+	B9d2	0.825192	0.891118	0.82709	1.15583	0.924808
13	52729615	52757206	-	BB123696	0.00610018	0.0080567	0.0073405	0.0100038	0.0078753
2	106642914	106650365	-	BB218582	0.240948	0.223754	0.228327	0.229672	0.230675
6	58965655	59002084	+	BB365896	0.00770037	0.00711909	0.0189027	0.0151535	0.0122189
13	100106795	100108340	-	BC001981	0.0874292	0.142277	3.84395e-05	0.0714598	0.0753011
17	16951539	16974158	+	BC002059	0.0103244	0.00669338	0.00461729	0.0081085	0.00743589
3	19685971	19686569	+	BC002189	7.03637	6.62912	5.9608	10.5236	7.53747
17	25184554	25187663	+	BC003965	3.26623	3.26516	3.54381	4.88284	3.73951
17	29268788	29314066	+	BC004004	1.69631	1.84764	1.87641	2.3194	1.93494
13	24801657	24816198	+	BC005537	4.42932	4.55562	4.83869	5.78184	4.90137
2	30972177	30982202	-	BC005624	1.76712	1.50626	1.61884	2.13846	1.75767
7	128271379	128298171	-	BC017158	0.201027	0.257562	0.238664	0.317461	0.253679
11	116752167	116759374	+	BC018473	0.304235	0.469091	0.421532	0.076596	0.317863
X	169368189	169370004	+	BC022960	0.0618219	0.0408251	0.0669527	0.121659	0.0728147
18	60441765	60442981	+	BC023105	0	0.152339	0.0999335	0.30164	0.138478
7	27195781	27210187	+	BC024978	0.631719	0.727979	0.658025	0.955575	0.743325
10	81606270	81620704	+	BC025920	0.104946	0.146306	0.109446	0.168278	0.132244
18	76226703	76228859	-	BC026513	0.208176	0.0657775	0.0187877	0.0512084	0.0859874
3	95883954	95892006	-	BC028528	0.249504	0.299585	0.27378	0.293517	0.279096
2	155817730	155819427	-	BC029722	9.95115	9.84475	11.5144	13.5323	11.2106
5	143270075	143272514	+	BC030343	0.138016	0.136711	0.14947	0.158433	0.145657
18	75005868	75010153	+	BC031181	2.3602	2.39149	2.70206	3.47566	2.73235
1	155212471	155244445	-	BC034090	1.981	1.77284	1.75839	2.40154	1.97844
6	128849090	128891127	-	BC035044	0.00266924	0.00176267	0	0.00919235	0.00340606
15	4020114	4027406	-	BC037032	0.419421	0.39114	0.588663	0.642454	0.51042
18	37805718	37807923	-	BC037039	1.07932	0.574202	1.03823	0.712218	0.850993
19	43675178	43677177	+	BC037704	0.140329	0.166803	0.222896	0.276152	0.201545
9	96435783	96438139	-	BC043934	0.190504	0.471758	0.550171	0.515475	0.431977
2	165857684	165859035	+	BC046401	0.166109	0.329078	0.569668	1.02152	0.521594
10	121739937	121752879	+	BC048403	0.130049	0.0916056	0.0876355	0.187677	0.124242
13	67863326	67863926	+	BC048507	0.367061	1.10751	0.819652	0.117342	0.602891
6	136827626	136840663	+	BC049715	0.0249052	0.0194413	0.0246769	0.0307014	0.0249312
17	33908044	33909318	-	BC051226	0.704595	0.639774	0.89025	0.476632	0.677813
2	115581716	115778769	+	BC052040	0.00626366	0.00714453	0.00842799	0.00700354	0.00720993
1	163945993	163994797	-	BC055324	0.010344	0.00658033	0.00801207	0.00916133	0.00852443
7	34250252	34251356	-	BC060293	1.01636	0.939642	1.01226	1.2014	1.04242
X	136741824	136803365	+	BC065397	0.0209678	0.00969886	0.00930029	0.0199232	0.0149725
13	113293159	113379712	+	BC067074	0.0317616	0.0316755	0.0290157	0.0242361	0.0291722
1	183205071	183206558	-	BC085271	0.209086	0.0366315	0.0684789	0.0860624	0.100065
[truncated: 17,968 more rows]

## Sheet: 14-3-3
		Extact 14-3-3 isoforms
Chromosome	Start	Stop	Strand	Gene Symbol	GSM1531480	GSM1531481	GSM1531478	GSM1531479	averageTPM
2	163994960	164018589	+	Ywhab	1.95409	1.85957	1.82569	2.67498	2.07858
11	75732869	75765846	+	Ywhae	7.0518	6.44203	6.73484	7.80739	7.00901
5	135908409	135934617	-	Ywhag	7.07274	6.49999	7.1854	9.15212	7.47756
5	33018816	33027967	+	Ywhah	2.58924	2.55857	2.47139	2.51337	2.53314
12	21390071	21417638	-	Ywhaq	0.273722	0.233815	0.202118	0.27038	0.245009
15	36770770	36796930	-	Ywhaz	1.94397	1.9612	2.10698	2.17808	2.04756
