# Supplementary material for: Proteomic Landscape and Deduced Functions of the Cardiac 14-3-3 Protein Interactome
Source: Cells. 2022 Nov 4;11(21):3496. doi: 10.3390/cells11213496 (PMC9654263; doi:10.3390/cells11213496)
Supplement: Supplementary file 1 [file cells-11-03496-s001.zip › supplementary_TableS2-public_proteome_SILAC.xlsx]

## Sheet: extract_heart
Supplementary Table S2. Protein intensity of public proteome.
Protein IDs	Majority protein IDs	Protein names	Gene names	Intensity L Heart	Normalized Ratio
F6VME3;P04370-10;P04370-5;F6RT34;P04370-4;P04370-7;F6ZIA4;F7A0B0;P04370-9;P04370;F6RWW8;P04370-8;P04370-14;F6TYB7;P04370-11;P04370-6;Q542T4;P04370-13;P04370-2;Q5D096	F6VME3;P04370-10;P04370-5;F6RT34;P04370-4;P04370-7;F6ZIA4;F7A0B0;P04370-9;P04370;F6RWW8;P04370-8;P04370-14	Myelin basic protein	Mbp	46300000	0.0402528
Q9D8U3	Q9D8U3	Endoplasmic reticulum resident protein 27	Erp27	8036700	0.109748
P24622;Q546L9;P24622-2;Q569M7	P24622;Q546L9;P24622-2;Q569M7	Alpha-crystallin A chain;Alpha-crystallin A chain, short form	Cryaa	1710000000	1.06843
Q91WB5;G3UXN8	Q91WB5;G3UXN8		Abpa	27500000	0.0613271
P11404;Q5EBJ0	P11404;Q5EBJ0	Fatty acid-binding protein, heart	Fabp3	11100000000	20.1211
P62696	P62696	Beta-crystallin B2	Crybb2	5020000000	0.487805
P63040;D3YZ72	P63040;D3YZ72	Complexin-1	Cplx1	4805600	0.16297
P23927;Q52L78;F8WJ07	P23927;Q52L78;F8WJ07	Alpha-crystallin B chain	Cryab	12200000000	2.09938
P19246;F7A3A1	P19246;F7A3A1	Neurofilament heavy polypeptide	Nefh	2825400	0.176267
P46660	P46660	Alpha-internexin	Ina	21600000	0.0759936
P08551	P08551	Neurofilament light polypeptide	Nefl	167000000	0.0926269
P04247;Q3UVB1	P04247;Q3UVB1	Myoglobin	Mb	40600000000	19.3371
E9Q789;Q9WVJ5;E9PYP8;E9Q788	E9Q789;Q9WVJ5;E9PYP8;E9Q788	Beta-crystallin B1;Beta-crystallin B1B	Crybb1	28800000	0.706364
Q8JZX1	Q8JZX1		Abpg	0	NaN
O55042;O55042-2	O55042;O55042-2	Alpha-synuclein	Snca	45200000	0.103368
P60202;Q3UYM8;A2AEB1;P60202-2;F8WGE4	P60202;Q3UYM8;A2AEB1;P60202-2	Myelin proteolipid protein	Plp1	2994700	0.0608088
Q9JJU9;D3Z1U1;D3YYW5;D3Z2L5	Q9JJU9;D3Z1U1;D3YYW5;D3Z2L5	Beta-crystallin B3	Crybb3	255000000	1.12396
P07743;B7ZCG3	P07743;B7ZCG3	BPI fold-containing family A member 2	Bpifa2	3751400	0.160971
Q9QUK9;E9PXU6	Q9QUK9;E9PXU6		Try5	5832600	0.0353344
O09161;B9EHC7;E9PXG0;E9PZ67	O09161;B9EHC7;E9PXG0;E9PZ67	Calsequestrin-2;Calsequestrin	Casq2	2200000000	17.1488
Q6P3Z7;P50752;Q54AB6;P50752-4;P50752-3;P50752-2	Q6P3Z7;P50752;Q54AB6;P50752-4;P50752-3;P50752-2	Troponin T, cardiac muscle	Tnnt2	18100000000	42.7186
Q91XV3	Q91XV3	Brain acid soluble protein 1	Basp1	7341700	0.103911
Q62468;F6V2H5	Q62468	Villin-1	Vil1	109000000	0.0882535
Q7TQF7	Q7TQF7	Amphiphysin	Amph	7695900	0.157448
P48787;Q497F1;D3YXP5;D3Z160	P48787;Q497F1	Troponin I, cardiac muscle	Tnni3	10200000000	43.2302
Q9CR35	Q9CR35	Chymotrypsinogen B;Chymotrypsin B chain A;Chymotrypsin B chain B;Chymotrypsin B chain C	Ctrb1	26700000	0.125222
P00683;Q8C6G3	P00683;Q8C6G3	Ribonuclease pancreatic	Rnase1	11800000	0.104764
P00688;E9PZ01	P00688;E9PZ01	Pancreatic alpha-amylase	Amy2;Amy2a2	146000000	0.100776
P19123;E9Q8P0	P19123;E9Q8P0	Troponin C, slow skeletal and cardiac muscles	Tnnc1	6050000000	12.672
Q8VCK7	Q8VCK7	Syncollin	Sycn	2403500	0.156406
P51162	P51162	Gastrotropin	Fabp6	65500000	0.149107
Q059R7;Q08652	Q059R7;Q08652	Retinol-binding protein 2	Rbp2	293000000	0.122294
P58771;Q545Y3;Q8BSH3;E9Q454	P58771;Q545Y3;Q8BSH3;E9Q454	Tropomyosin alpha-1 chain	Tpm1	5760000000	21.8331
P07146;Q792Y6	P07146;Q792Y6	Anionic trypsin-2	Prss2	5910300	0.101008
E9QPB2;Q8CIT9;Q8CIT9-3	E9QPB2;Q8CIT9	Suprabasin	Sbsn	1243100	0.126557
P30275;Q545N7;A2ARP5;B0R0F0;B0R0E9	P30275;Q545N7	Creatine kinase U-type, mitochondrial	Ckmt1	27200000	0.13783
P32848;Q545M7	P32848;Q545M7	Parvalbumin alpha	Pvalb	101000000	0.118555
P51667;E9Q8Y0;F6RBQ5	P51667;E9Q8Y0;F6RBQ5	Myosin regulatory light chain 2, ventricular/cardiac muscle isoform	Myl2	38700000000	35.4233
P08074;Q542P5;F6YNX9	P08074;Q542P5;F6YNX9	Carbonyl reductase [NADPH] 2	Cbr2	59700000	0.109777
Q3USB7;F6Q993	Q3USB7;F6Q993	Inactive phospholipase C-like protein 1	Plcl1	18500000	0.0464684
Q9QXN5;F7CHR4	Q9QXN5	Inositol oxygenase	Miox	2474300	0.124066
Q3TLP5;Q3TLP5-2;E9QKF1;Q3TLP5-3;F6YTG0	Q3TLP5;Q3TLP5-2;E9QKF1;Q3TLP5-3;F6YTG0	Enoyl-CoA hydratase domain-containing protein 2, mitochondrial	Echdc2	2262500	NaN
Q91X79	Q91X79	Chymotrypsin-like elastase family member 1	Cela1	20500000	0.104746
Q3V2H7;Q64285	Q3V2H7;Q64285	Bile salt-activated lipase	Cel	8994400	0.14534
A2AS59;P12658	A2AS59;P12658	Calbindin	Calb1	14300000	0.0902039
Q08331;Q8CCS7	Q08331;Q8CCS7	Calretinin	Calb2	30100000	0.133264
O35486;Q3UPY3	O35486;Q3UPY3	Beta-crystallin S	Crygs	279000000	1.56021
P12242	P12242	Mitochondrial brown fat uncoupling protein 1	Ucp1	7383000	0.117314
Q9JJW5;D6RGM5	Q9JJW5	Myozenin-2	Myoz2	1280000000	47.4969
Q7TPZ8	Q7TPZ8	Carboxypeptidase A1	Cpa1	19500000	0.116728
O70456	O70456	14-3-3 protein sigma	Sfn	19000000	0.150218
E9Q0B5;E9Q9C6	E9Q0B5;E9Q9C6		Fcgbp	42500000	0.159094
A2AS95;P05208	A2AS95;P05208	Chymotrypsin-like elastase family member 2A	Cela2a	8864000	0.128066
P62761;Q4W4C9	P62761;Q4W4C9	Visinin-like protein 1	Vsnl1	4428300	0.148278
P36369;P36368;F7BJ25	P36369;P36368;F7BJ25	Kallikrein 1-related peptidase b26;Epidermal growth factor-binding protein type B	Klk1b26;Egfbp2	2103700	0.117727
A2RT14;Q64288	A2RT14;Q64288	Olfactory marker protein	Omp	5213800	0.121939
B2RSH3;Q08091;Q08091-2	B2RSH3;Q08091;Q08091-2	Calponin-1	Cnn1	47400000	0.240182
Q9QXC6;E9Q7J6;P02525	Q9QXC6;E9Q7J6;P02525	Beta-crystallin A1	Cryba1	351000000	2.29853
Q06318;Q3UKV9	Q06318;Q3UKV9	Uteroglobin	Scgb1a1	24000000	0.0967586
P15947	P15947	Kallikrein-1	Klk1	47100000	0.079321
P70695;Q3TKP4	P70695;Q3TKP4	Fructose-1,6-bisphosphatase isozyme 2	Fbp2	35100000	0.292577
P09542	P09542	Myosin light chain 3	Myl3	28100000000	24.2266
Q9R0T7;E9Q015	Q9R0T7;E9Q015		Try4	15700000	0.0957487
P35385;Q5FW72	P35385;Q5FW72	Heat shock protein beta-7	Hspb7	263000000	11.5602
Q9CQW5	Q9CQW5	Galectin-2	Lgals2	9883800	0.0564908
B2RXX9;Q91Z83;B8JJH1	B2RXX9;Q91Z83	Myosin-7	Myh7	85700000	0.502968
P58774	P58774	Tropomyosin beta chain	Tpm2	247000000	0.214367
P26339	P26339	Chromogranin-A;Pancreastatin;Beta-granin;WE-14	Chga	1778700	0.115084
E9Q5Z6;E9Q4Y1;Q3UQ40	E9Q5Z6;E9Q4Y1		Adh6a	44000000	0.135368
P37804	P37804	Transgelin	Tagln	955000000	0.450349
B2RS76	B2RS76		Cpb1	73500000	0.150478
P08553;D3YZ35;REV__Q8R344	P08553	Neurofilament medium polypeptide	Nefm	67000000	0.103608
B2RQQ1;Q02566;B8JJH5;Q1WNP4;B8JJH3	B2RQQ1;Q02566	Myosin-6	Myh6	27400000000	8.87469
P03995	P03995	Glial fibrillary acidic protein	Gfap	22500000	0.0810373
Q70IV5;Q70IV5-2;F6VN34;Q70IV5-3;Q05CE2	Q70IV5;Q70IV5-2;F6VN34	Synemin	Synm	8826300	0.281373
Q5BKQ4	Q5BKQ4	Pancreatic lipase-related protein 1	Pnliprp1	15800000	0.114124
Q60604;Q60604-2;F6UI38	Q60604;Q60604-2;F6UI38	Adseverin	Scin	42400000	0.177069
P05977;Q545T7;E0CZ30	P05977;Q545T7;E0CZ30	Myosin light chain 1/3, skeletal muscle isoform	Myl1	170000000	0.0934317
O88312	O88312	Anterior gradient protein 2 homolog	Agr2	25600000	0.100991
Q9R1Q8	Q9R1Q8	Transgelin-3	Tagln3	24700000	0.255604
O08691	O08691	Arginase-2, mitochondrial	Arg2	15900000	0.111782
P28825	P28825	Meprin A subunit alpha	Mep1a	6775500	0.155135
D3Z6P0;D3Z6P0-2;F6S5U2;F6Q519	D3Z6P0;D3Z6P0-2	Protein disulfide-isomerase A2	Pdia2	476000000	0.114009
Q9CQS6	Q9CQS6	Gastrokine-2	Gkn2	3023800	0.11584
P97457;Q545G1	P97457;Q545G1	Myosin regulatory light chain 2, skeletal muscle isoform	Mylpf	177000000	0.0980777
Q7TQ48;Q7TQ48-2	Q7TQ48;Q7TQ48-2	Sarcalumenin	Srl	3730000000	10.8674
Q9JJV2;Q9JJV2-3;D3YWS3	Q9JJV2;Q9JJV2-3;D3YWS3	Profilin-2;Profilin	Pfn2	16800000	0.783822
O70209	O70209	PDZ and LIM domain protein 3	Pdlim3	18900000	0.422779
F8WID5	F8WID5		Tpm1	31600000000	12.3516
P04117;Q542H7;P24526	P04117;Q542H7	Fatty acid-binding protein, adipocyte	Fabp4	2230000000	0.670826
Q6P8U6	Q6P8U6	Pancreatic triacylglycerol lipase	Pnlip	13200000	0.0959785
Q9JKA5	Q9JKA5	Cell surface A33 antigen	Gpa33	231680	0.0735294
Q69Z91;Q569W4;Q99NB1	Q69Z91;Q569W4;Q99NB1	Acetyl-coenzyme A synthetase 2-like, mitochondrial	Acss1	79700000	0.891266
P20443;Q3UPX6	P20443;Q3UPX6	S-arrestin	Sag	9607100	0.148602
Q5GQ64;Q9Z0F7	Q5GQ64;Q9Z0F7	Gamma-synuclein	Sncg	50200000	0.975991
Q9CZ19;A2A6Q8;P09541;D6RFU4	Q9CZ19;A2A6Q8;P09541	Myosin light chain 4	Myl4	2300000000	38.7672
Q3UW98;Q3UTT3	Q3UW98		AI747448	1501300	0.207159
P13412;A2A6J8;A2A6K0	P13412;A2A6J8;A2A6K0	Troponin I, fast skeletal muscle	Tnni2	31400000	0.0803277
Q9R0Y5-2;Q9R0Y5	Q9R0Y5-2;Q9R0Y5	Adenylate kinase isoenzyme 1	Ak1	4470000000	7.44879
Q99JW5	Q99JW5	Epithelial cell adhesion molecule	Epcam	4884300	0.193065
Q3UL35;Q8K419;E9PVE4;O54891	Q3UL35;Q8K419;E9PVE4;O54891	Galectin-4;Galectin-6	Lgals4;Lgals6	21100000	0.124966
Q9D0K2;Q3UJQ9	Q9D0K2;Q3UJQ9	Succinyl-CoA:3-ketoacid-coenzyme A transferase 1, mitochondrial	Oxct1	1270000000	2.25505
Q4G0D3;Q9JK88	Q4G0D3;Q9JK88	Serpin I2	Serpini2	14400000	0.133901
Q9CR36;Q53YU8	Q9CR36;Q53YU8	Gastrokine-1	Gkn1	33300000	0.260988
P63084;Q149U2	P63084;Q149U2	Protein S100-A5	S100a5	6707700	0.123369
Q3TS19;P13634;D3YYQ4	Q3TS19;P13634	Carbonic anhydrase 1	Car1;Ca1	667000000	0.58072
P97443;P97443-2;Q3UQT9;P97443-3;G5E8R7;G3UZ94	P97443;P97443-2;Q3UQT9;P97443-3;G5E8R7	SET and MYND domain-containing protein 1	Smyd1	157000000	5.87371
Q6P8J7	Q6P8J7	Creatine kinase S-type, mitochondrial	Ckmt2	1680000000	6.21195
Q8CGN5;Q8CGN5-2;Q8CGN5-3;Q8CGN5-4	Q8CGN5;Q8CGN5-2;Q8CGN5-3;Q8CGN5-4	Perilipin-1	Plin1	27300000	0.177223
P56392;Q792A4	P56392;Q792A4	Cytochrome c oxidase subunit 7A1, mitochondrial	Cox7a1	1470000000	14.2782
Q5SQ27	Q5SQ27		Sec14l3	6750400	0.138024
Q9Z110-2;H3BKK0	Q9Z110-2			4827800	0.105346
Q04447	Q04447	Creatine kinase B-type	Ckb	227000000	0.224462
O35855;Q3ULU3;D3Z7C8;O88374;D3Z3D7	O35855;Q3ULU3;D3Z7C8;O88374	Branched-chain-amino-acid aminotransferase, mitochondrial;Branched-chain-amino-acid aminotransferase	Bcat2	138000000	0.740686
B7ZNM7;Q9Z2Q6;Q52KH2	B7ZNM7;Q9Z2Q6;Q52KH2	Septin-5	2020-09-05	5901500	0.151646
P54227;Q545B6;D3Z5N2;D3Z1Z8	P54227;Q545B6;D3Z5N2;D3Z1Z8	Stathmin	Stmn1	13600000	0.39546
Q9CQ52	Q9CQ52	Chymotrypsin-like elastase family member 3B	Cela3b	381130	NaN
E9QPT3;P06281;P00796	E9QPT3;P06281;P00796	Renin-1;Renin-2;Renin-2 heavy chain;Renin-2 light chain	Ren1;Ren2	6144000	0.255885
P62737	P62737	Actin, aortic smooth muscle	Acta2	10400000000	3.7669
Q9JK37	Q9JK37	Myozenin-1	Myoz1	15200000	0.0940291
O54724;Q3TER0	O54724	Polymerase I and transcript release factor	Ptrf	2050000000	4.22547
O70423;O70423-2;A2A4I8;Q812C9;A2A4I9	O70423;O70423-2;A2A4I8	Membrane primary amine oxidase	Aoc3	1500900	0.210128
Q61753;F6ZSB7;E9QAP9	Q61753	D-3-phosphoglycerate dehydrogenase	Phgdh	13900000	0.132936
P20357;G3UZK9;G3UZE9;F7ALC8;Q3TLQ0;Q80ZL4;Q80X35;G3UZV6;E9Q8Y2;G3UXY3	P20357	Microtubule-associated protein 2	Map2	12600000	0.206403
G3UW84;Q9JI91;D3YY95	G3UW84;Q9JI91	Alpha-actinin-2	Actn2	1110000000	3.29348
P14069;Q545I9	P14069;Q545I9	Protein S100-A6	S100a6	107000000	0.586854
P58774-2;Q6PJ18	P58774-2;Q6PJ18		Tpm2	321000000	0.566027
Q9D7Z6	Q9D7Z6	Calcium-activated chloride channel regulator 1	Clca1	18000000	0.122437
A2A5Y6;P10637;P10637-6;B1AQW5;B1AQW6	A2A5Y6;P10637;P10637-6	Microtubule-associated protein;Microtubule-associated protein tau	Mapt	62300000	0.35524
P17183;Q545V3;D3Z6E4;D3Z2S4;D3YVD3	P17183;Q545V3;D3Z6E4	Gamma-enolase;Enolase	Eno2	74300000	0.160429
Q08642	Q08642	Protein-arginine deiminase type-2	Padi2	634360	0.146979
Q91WR5;D3YWM3	Q91WR5;D3YWM3	Aldo-keto reductase family 1 member C21	Akr1c21	4984000	0.111189
G3UW82;Q5SX41;E9PZ09	G3UW82;Q5SX41;E9PZ09		Myh2	113000000	0.114599
Q9R0P9	Q9R0P9	Ubiquitin carboxyl-terminal hydrolase isozyme L1	Uchl1	53900000	0.254214
O35400;O35400-2;E9QKC1	O35400;O35400-2;E9QKC1	Sulfotransferase family cytosolic 2B member 1	Sult2b1	318500	0.0989805
Q9CPN9	Q9CPN9		2210010C04Rik	7516500	0.154895
Q91WQ9;Q91WQ9-2;E9Q1L1;Q91WQ9-3	Q91WQ9;Q91WQ9-2;E9Q1L1;Q91WQ9-3	Calmodulin-like protein 4	Calml4	1719500	0.18557
A2APW8;P28663;D6RHL2	A2APW8;P28663	Beta-soluble NSF attachment protein	Napb	2932000	0.0964413
Q9JKS4-2;Q9JKS4-4;E9PYJ9	Q9JKS4-2;Q9JKS4-4;E9PYJ9		Ldb3	1300000000	9.04241
B8JJB5;Q3TJD7-2	B8JJB5;Q3TJD7-2		Pdlim7	0	NaN
A2A724;P39098;P39098-2;A2A723	A2A724;P39098;P39098-2	Mannosyl-oligosaccharide 1,2-alpha-mannosidase IB	Man1a2	0	NaN
P50608;Q543D2	P50608;Q543D2	Fibromodulin	Fmod	12700000	1.57881
P49817;P49817-2;D3Z148;H3BLK5;H3BKG0;D3Z0J2;P51637	P49817;P49817-2;D3Z148;H3BLK5;H3BKG0	Caveolin-1;Caveolin	Cav1	48100000	0.502513
A2AGQ1;Q3UIK0;E9Q9T8;O70468	A2AGQ1;Q3UIK0;E9Q9T8;O70468	Myosin-binding protein C, cardiac-type	Mybpc3	3060000000	14.865
Q9D8I3	Q9D8I3	Glyoxalase domain-containing protein 5	Glod5	3437700	0.087727
P31001;Q3V1K9	P31001;Q3V1K9	Desmin	Des	4440000000	7.67401
Q9JJV1	Q9JJV1	Beta-crystallin A2	Cryba2	91500000	4.70124
B8K282;Q91XA9;D3Z1S6	B8K282;Q91XA9;D3Z1S6	Acidic mammalian chitinase	Chia	967670	NaN
G5E884;O88643;G3XA44	G5E884;O88643	Serine/threonine-protein kinase PAK 1	Pak1	528160	0.13234
O09049;Q545I1	O09049;Q545I1	Regenerating islet-derived protein 3-gamma	Reg3g	1176400	0.330218
Q9QZ47-10	Q9QZ47-10			44000000	0.0884721
Q6PZE0;E0CXL6;F6YXH5	Q6PZE0;E0CXL6	Mucin-19	Muc19	4112100	0.157866
E9QPE7;O08638-2	E9QPE7;O08638-2		Myh11	384000000	0.16046
Q8BH64;Q8R2X0;D3Z7U7	Q8BH64;Q8R2X0	EH domain-containing protein 2	Ehd2	111000000	0.583022
P68134	P68134	Actin, alpha skeletal muscle	Acta1	1150000000	0.711946
O88935;O88935-3	O88935;O88935-3	Synapsin-1	Syn1	11900000	0.151623
P16125;D3Z7F0	P16125;D3Z7F0	L-lactate dehydrogenase B chain;L-lactate dehydrogenase	Ldhb	3750000000	1.55359
P46412;D3Z7Y0;D3Z2Y7	P46412;D3Z7Y0;D3Z2Y7	Glutathione peroxidase 3;Glutathione peroxidase	Gpx3	69600000	0.289411
P81117	P81117	Nucleobindin-2	Nucb2	22400000	0.270724
A2A4Z2;P20801	A2A4Z2;P20801	Troponin C, skeletal muscle	Tnnc2	12900000	0.0808277
Q91ZZ3	Q91ZZ3	Beta-synuclein	Sncb	37100000	0.212712
A2RTA0;P07310	A2RTA0;P07310	Creatine kinase M-type	Ckm	6610000000	3.6974
F8VQM5	F8VQM5		Sis	16800000	0.117032
Q8K0L3-2;Q8K0L3-3;Q8K0L3;F6V4U2;F6XLJ8;D3YXB1	Q8K0L3-2;Q8K0L3-3;Q8K0L3	Acyl-coenzyme A synthetase ACSM2, mitochondrial	Acsm2	18800000	0.162821
Q4FK56;Q60928;F6WUX1;D3Z266;D3YVY4;D3Z4Q6;D3YY79;D3YWW4;D3YWW2;F6V328	Q4FK56;Q60928;F6WUX1;D3Z266;D3YVY4;D3Z4Q6	Gamma-glutamyltranspeptidase 1;Gamma-glutamyltranspeptidase 1 heavy chain;Gamma-glutamyltranspeptidase 1 light chain	Ggt1	2965700	0.370892
Q8BG95;A6H644;F6UIT9;Q8BG95-2	Q8BG95;A6H644	Protein phosphatase 1 regulatory subunit 12B	Ppp1r12b	161000000	4.54256
P18894;Q91WH3	P18894;Q91WH3	D-amino-acid oxidase	Dao	2582400	0.160785
P18761	P18761	Carbonic anhydrase 6	Ca6	3911700	0.0987654
P63254	P63254	Cysteine-rich protein 1	Crip1	204000000	0.263491
P50114;Q3UY00	P50114;Q3UY00	Protein S100-B	S100b	6858700	0.100598
Q8K009;D3Z6B9	Q8K009;D3Z6B9	Mitochondrial 10-formyltetrahydrofolate dehydrogenase	Aldh1l2	16200000	0.291163
Q8BH04;Q3UGF0	Q8BH04;Q3UGF0	Phosphoenolpyruvate carboxykinase [GTP], mitochondrial	Pck2	4025600	0.154548
A2ALV3;Q62420;Q8BXU5;F6ZL13;A2ALV1	A2ALV3;Q62420;Q8BXU5;F6ZL13;A2ALV1	Endophilin-A1	Sh3gl2	9980100	0.118516
Q54AA2;Q9EPB4	Q54AA2;Q9EPB4	Apoptosis-associated speck-like protein containing a CARD	Pycard	21800000	0.362476
O08528;E9Q5B5;E9Q9M6	O08528;E9Q5B5	Hexokinase-2	Hk2	37900000	0.524274
Q9WV92-3;Q9WV92-2;Q9WV92;Q9WV92-6;Q9WV92-5;Q9WV92-4	Q9WV92-3;Q9WV92-2;Q9WV92;Q9WV92-6;Q9WV92-5;Q9WV92-4	Band 4.1-like protein 3	Epb41l3	18400000	0.144152
Q9QZ82	Q9QZ82	Cholesterol side-chain cleavage enzyme, mitochondrial	Cyp11a1	1033000	0.172244
Q3TWR9;Q9R062;D3Z5N4	Q3TWR9;Q9R062;D3Z5N4	Glycogenin-1	Gyg;Gyg1	138000000	4.31332
Q61024;D3Z0C2;D3YYR0;D3Z028	Q61024	Asparagine synthetase [glutamine-hydrolyzing]	Asns	5202700	0.135568
O08599	O08599	Syntaxin-binding protein 1	Stxbp1	26800000	0.127447
A2ARV4;A2ARV5	A2ARV4	Low-density lipoprotein receptor-related protein 2	Lrp2	50400000	0.162475
A2AKS8;Q9R100;A2AKS7	A2AKS8;Q9R100;A2AKS7	Cadherin-17	Cdh17	33600000	0.151646
Q9D964	Q9D964	Glycine amidinotransferase, mitochondrial	Gatm	8579100	0.113266
G3UW41;A2A9Y9;Q9CQH0	G3UW41;A2A9Y9;Q9CQH0	PDZK1-interacting protein 1	Pdzk1ip1	0	NaN
O70250;Q5NCI4	O70250;Q5NCI4	Phosphoglycerate mutase 2	Pgam2	1990000000	5.51177
P62631;B7ZBW3	P62631;B7ZBW3	Elongation factor 1-alpha 2;Elongation factor 1-alpha	Eef1a2	323000000	2.67709
P18872-2;D3Z2M7;F7BLT7	P18872-2			3458400	0.225058
P21550;Q5SX58;Q5SX59;Q5SX60;Q5SX61	P21550;Q5SX58	Beta-enolase	Eno3	5720000000	5.41947
A2AEX8;A2AEX6;A2AEY3;P97447;A2AEY2;A2AEY1;A2AEX7;P97447-2;A2AEY0;Q8CDC8;A2AEX9	A2AEX8;A2AEX6;A2AEY3;P97447;A2AEY2;A2AEY1;A2AEX7	Four and a half LIM domains protein 1	Fhl1	46800000	0.450369
P97315;Q4FJX4	P97315;Q4FJX4	Cysteine and glycine-rich protein 1	Csrp1	112000000	0.228608
P57016	P57016	Ladinin-1	Lad1	726880	0.121436
Q91VJ2	Q91VJ2	Protein kinase C delta-binding protein	Prkcdbp	49900000	2.21077
Q8K0C9	Q8K0C9	GDP-mannose 4,6 dehydratase	Gmds	18700000	0.120726
G3X981;P15331-2;G5E846;P15331;P15331-3	G3X981;P15331-2;G5E846;P15331;P15331-3	Peripherin	Prph	29800000	1.00908
Q63810;Q63810-2;Q497S1;Q63811	Q63810;Q63810-2	Calcineurin subunit B type 1	Ppp3r1	18000000	0.347778
Q8BXK9;F6PX93	Q8BXK9	Chloride intracellular channel protein 5	Clic5	45800000	0.392603
Q9WUA3;Q8C605;F6YL81;Q9WUA3-2;D3YUA3	Q9WUA3;Q8C605	6-phosphofructokinase type C;6-phosphofructokinase	Pfkp	20600000	0.158238
D3Z576;Q8VHX6;D3YW87;Q8VHX6-2	D3Z576;Q8VHX6;D3YW87;Q8VHX6-2	Filamin-C	Flnc	85600000	0.909918
Q99MZ6	Q99MZ6	Unconventional myosin-VIIb	Myo7b	1459300	0.174633
Q6NVD9;Q6NVD9-2	Q6NVD9	Phakinin	Bfsp2	129000000	0.898553
E9QN70;P02469;E9PYT5;E9PZF8;Q3TNZ8	E9QN70;P02469	Laminin subunit beta-1	Lamb1	101000000	0.475443
P49813	P49813	Tropomodulin-1	Tmod1	440000000	27.0088
Q9JKK7;Q9JKK7-3;Q9JKK7-2	Q9JKK7;Q9JKK7-3	Tropomodulin-2	Tmod2	18000000	0.317551
Q8R3G9	Q8R3G9	Tetraspanin-8	Tspan8	1766400	NaN
Q6P6L5;F6RQD1;F7D574;D3Z7T5	Q6P6L5;F6RQD1		Mybpc1	20400000	0.152875
Q543C5;Q62000	Q543C5;Q62000	Mimecan	Ogn	20000000	0.765287
P51807	P51807	Dynein light chain Tctex-type 1	Dynlt1	3842500	0.330502
Q3TTY0;Q3TTY0-3;Q3TTY0-2;Q3TTY0-4	Q3TTY0	Phospholipase B1, membrane-associated;Phospholipase A2;Lysophospholipase	Plb1	0	NaN
P10493	P10493	Nidogen-1	Nid1	146000000	1.30535
P14602;Q545F4;P14602-2;P14602-3;D3YZ06	P14602;Q545F4;P14602-2;P14602-3;D3YZ06	Heat shock protein beta-1	Hspb1	1190000000	4.54463
A6H6K1;Q99MQ4	A6H6K1;Q99MQ4	Asporin	Aspn	48000000	0.919879
P41731;Q549D0	P41731;Q549D0	CD63 antigen	Cd63	1372300	0.344614
Q9ES64-3;H3BLC4;E9QMN1;Q9ES64;E9PYX1;D6RIM8;Q9ES64-2;E9QKC9;H3BIZ2	Q9ES64-3;H3BLC4;E9QMN1;Q9ES64;E9PYX1;D6RIM8;Q9ES64-2;E9QKC9;H3BIZ2	Harmonin	Ush1c	1135600	0.332568
Q5SVJ0;P28652;Q5SVI2;Q5SVI0;Q5SVI1;Q68EG2;Q5SVI3;Q5SVJ1;Q5SVI9;Q3TY93	Q5SVJ0;P28652;Q5SVI2;Q5SVI0;Q5SVI1;Q68EG2;Q5SVI3;Q5SVJ1;Q5SVI9;Q3TY93	Calcium/calmodulin-dependent protein kinase type II subunit beta	Camk2b	1133400	0.234208
B8JJB6;Q3TJD7;Q8BVJ7;B8JJB3;Q3TJD7-3;B8JJB2;B8JJB1	B8JJB6;Q3TJD7;Q8BVJ7;B8JJB3;Q3TJD7-3;B8JJB2	PDZ and LIM domain protein 7	Pdlim7	8162700	0.194587
O09165;E9Q489	O09165	Calsequestrin-1	Casq1	14300000	0.205015
P52480;P52480-2	P52480;P52480-2	Pyruvate kinase isozymes M1/M2	Pkm2	1110000000	0.556576
Q9D279	Q9D279	Uncharacterized protein C19orf21 homolog		2672300	0.186515
P07091;Q545V2;D3YUT9	P07091;Q545V2;D3YUT9	Protein S100-A4	S100a4	30200000	0.824402
Q3V2C9;Q91Z98	Q3V2C9;Q91Z98	Chitinase-3-like protein 4	Chi3l4	16800000	0.116232
O70571;Q544J2	O70571;Q544J2	[Pyruvate dehydrogenase [lipoamide]] kinase isozyme 4, mitochondrial	Pdk4	12300000	0.729661
Q3V2T4;Q3V2T4-2	Q3V2T4;Q3V2T4-2	Keratinocyte differentiation-associated protein	Krtdap	1608300	0.239981
Q99JG3;F6ZSM3	Q99JG3;F6ZSM3	Annexin A13;Annexin	Anxa13	3231100	0.157218
B7ZWN4	B7ZWN4		Gm766	2737500	0.14209
O54983;Q3UPX0	O54983;Q3UPX0	Thiomorpholine-carboxylate dehydrogenase	Crym	1966900	0.18316
Q62234-2;Q62234	Q62234-2;Q62234	Myomesin-1	Myom1	985000000	5.91471
D3Z7P3;D3Z7P4;F7B327	D3Z7P3;D3Z7P4	Glutaminase kidney isoform, mitochondrial	Gls	23500000	0.288251
P16330;Q3TYV5;P16330-2	P16330;Q3TYV5;P16330-2	2,3-cyclic-nucleotide 3-phosphodiesterase	Cnp	8453800	0.116678
Q3UCF3;Q810Q5;A2AK37	Q3UCF3;Q810Q5;A2AK37	Normal mucosa of esophagus-specific gene 1 protein	AA467197;Nmes1	129740	NaN
P70202;Q14BZ3	P70202;Q14BZ3	Latexin	Lxn	6447200	0.307977
Q61781	Q61781	Keratin, type I cytoskeletal 14	Krt14	12900000	0.694493
F8VQJ3;P02468;F6SFQ3;Q9R0B6;A2ATM9;F6TLW1	F8VQJ3;P02468	Laminin subunit gamma-1	Lamc1	114000000	0.559034
P16110;Q8C253;F6TS28	P16110;Q8C253;F6TS28	Galectin-3	Lgals3	25700000	0.236284
B9EKR1;E9PVE3	B9EKR1		Ptprz1	919230	0.122369
Q5SPV7;P56375	Q5SPV7;P56375	Acylphosphatase;Acylphosphatase-2	Acyp2	723000000	3.86339
P50543;F6SJ35;G5E8Y7	P50543;F6SJ35;G5E8Y7	Protein S100-A11	S100a11;Gm5068;Gm7665	41900000	0.543124
P97927	P97927	Laminin subunit alpha-4	Lama4	13300000	0.452653
Q8BZF8	Q8BZF8	Phosphoglucomutase-like protein 5	Pgm5	9300400	0.508208
F8WIU1;Q9D1K7;H7BXB9	F8WIU1;Q9D1K7;H7BXB9	UPF0687 protein C20orf27 homolog	1700037H04Rik	9993400	0.579878
P35230	P35230	Regenerating islet-derived protein 3-beta	Reg3b	174500	NaN
Q91YE8;E9Q1U2;D3YVV9;Q91YE8-2;F6WWS1	Q91YE8;E9Q1U2;D3YVV9;Q91YE8-2	Synaptopodin-2	Synpo2	71500000	0.931967
P00920	P00920	Carbonic anhydrase 2	Ca2	3340000000	1.60028
Q9D1H9;Q9D1H9-2	Q9D1H9;Q9D1H9-2	Microfibril-associated glycoprotein 4	Mfap4	3797200	0.69633
P13542;Q8BGE8;Q1WNQ0	P13542	Myosin-8	Myh8	1143400	0.107634
Q5SX40;E9PXR2;F7AA34;Q1WNQ6	Q5SX40	Myosin-1	Myh1	6680000000	1.15156
Q9CRB6	Q9CRB6	Tubulin polymerization-promoting protein family member 3	Tppp3	86100000	0.556266
Q80TB8;D3Z434	Q80TB8	Synaptic vesicle membrane protein VAT-1 homolog-like	Vat1l	777590	0.210464
P05064;Q5FWB7;Q9CPQ9;D3YWI1;A6ZI47;D3Z510	P05064;Q5FWB7;Q9CPQ9;D3YWI1	Fructose-bisphosphate aldolase A;Fructose-bisphosphate aldolase	Aldoa;Aldoart1	2710000000	0.981451
Q91VR7	Q91VR7	Microtubule-associated proteins 1A/1B light chain 3A	Map1lc3a	6908100	NaN
Q543K5;Q99K85;Q3U6K9;E9Q6P1	Q543K5;Q99K85;Q3U6K9	Phosphoserine aminotransferase	Psat1	6044100	0.140274
P70663	P70663	SPARC-like protein 1	Sparcl1	2872100	0.429203
P51885;CON__Q05443	P51885	Lumican	Lum	407000000	1.37514
Q60780;Q3U432;B1ATI9;Q60780-2	Q60780;Q3U432;B1ATI9;Q60780-2	Growth arrest-specific protein 7	Gas7	0	NaN
Q8VDP3;Q8VDP3-2;Q8VDP3-3;E9PUI4	Q8VDP3;Q8VDP3-2;Q8VDP3-3;E9PUI4	Protein-methionine sulfoxide oxidase MICAL1	Mical1	241980	NaN
Q60994;Q6GTX4	Q60994;Q6GTX4	Adiponectin	Adipoq	237000000	3.36802
Q9WV35	Q9WV35	Probable C->U-editing enzyme APOBEC-2	Apobec2	60400000	6.25
Q99KE1	Q99KE1	NAD-dependent malic enzyme, mitochondrial	Me2	1135100	0.115103
Q99JP6-2;Q99JP6;Q501M9	Q99JP6-2;Q99JP6	Homer protein homolog 3	Homer3	2567400	0.367688
E9PWE8	E9PWE8		Dpysl3	55900000	0.560099
B5THE2;F6VM63	B5THE2		Mgam	25300000	0.193686
Q3UU35	Q3UU35	Ovostatin homolog	Ovos	19500000	0.183453
Q14BI5	Q14BI5		Myom2	923000000	7.5466
Q9Z0P4	Q9Z0P4	Paralemmin-1	Palm	15000000	0.568021
P28654;Q3UKR1	P28654;Q3UKR1	Decorin	Dcn	83400000	0.466135
Q543Y7;Q61644	Q543Y7;Q61644	Protein kinase C and casein kinase substrate in neurons protein 1	Pacsin1	39500000	0.15425
E9PV44	E9PV44		Atpif1	1060000000	1.83577
P26645	P26645	Myristoylated alanine-rich C-kinase substrate	Marcks	184000000	0.418043
Q3TMZ1;Q922Q4	Q3TMZ1;Q922Q4	Pyrroline-5-carboxylate reductase;Pyrroline-5-carboxylate reductase 2	Pycr2	29900000	0.172491
Q7TMG8;O55126	Q7TMG8;O55126	Protein NipSnap homolog 2	Gbas	1030000000	4.62086
A2AEP9;Q9NYQ2	A2AEP9;Q9NYQ2	Hydroxyacid oxidase 2	Hao2	11100000	0.130996
P16045	P16045	Galectin-1	Lgals1	541000000	0.867303
Q3URG1;Q7TQD2	Q3URG1;Q7TQD2	Tubulin polymerization-promoting protein	Tppp	31500000	0.251452
B1AQE0;P05063	B1AQE0;P05063	Fructose-bisphosphate aldolase;Fructose-bisphosphate aldolase C	Aldoc	21600000	0.121526
Q62393-3;E9PUA7;Q62393-2;D3Z7X7;D3Z125	Q62393-3;E9PUA7;Q62393-2;D3Z7X7;D3Z125		Tpd52	73500000	0.370604
Q6P1J1;E9Q756	Q6P1J1;E9Q756		Crmp1	49800000	0.217599
Q64332-2;Q8CE19	Q64332-2;Q8CE19		Syn2	8351700	0.19734
Q8CDI9;E9Q4M2;P54310	Q8CDI9;E9Q4M2;P54310	Hormone-sensitive lipase	Lipe	2004600	0.127696
P08207;Q3TC45	P08207;Q3TC45	Protein S100-A10	S100a10	179000000	0.814863
Q921W7;Q3ULB1;P47226;P47226-2;A2ALC6;D6RH72	Q921W7;Q3ULB1;P47226;P47226-2	Testin	Tes	20500000	0.261288
P35276;Q543Q4;D3YW33;D3YWL1	P35276;Q543Q4;D3YW33;D3YWL1	Ras-related protein Rab-3D	Rab3d	5070800	0.213056
Q8BMD8	Q8BMD8	Calcium-binding mitochondrial carrier protein SCaMC-1	Slc25a24	6955500	0.191388
Q545R3;Q62433;E9PVF3;E9Q3F9;E9Q5I8;E9Q514;E9Q147;E9Q7V2;E9Q7G8;E9PZC7;E9Q0J8;F6VLR8	Q545R3;Q62433;E9PVF3;E9Q3F9;E9Q5I8;E9Q514;E9Q147	Protein NDRG1	Ndrg1	30900000	0.111821
Q91VW3	Q91VW3	SH3 domain-binding glutamic acid-rich-like protein 3	Sh3bgrl3	50100000	0.521458
P11531;F6RQU9;A2A9Z2;A2A9Z1;E9PZX6	P11531	Dystrophin	Dmd	12500000	1.74657
O89053;Q3U1N0	O89053;Q3U1N0	Coronin-1A	Coro1a	77000000	0.163597
E9Q584;D3Z5U0;D3YUM5;D3YTZ0;E9PYC2;E9PYC3	E9Q584;D3Z5U0;D3YUM5;D3YTZ0;E9PYC2;E9PYC3		Dcpp1;Dcpp3;Dcpp2	3144700	0.111797
Q5F2D0;Q8R1X1;Q91WC3-2;Q5ICG4;Q5ICG5;Q91WC3;Q5F2C5;Q8BYJ0;E9Q7Y2;F6WYN6;Q8C028;B0QZJ6	Q5F2D0;Q8R1X1;Q91WC3-2;Q5ICG4;Q5ICG5;Q91WC3;Q5F2C5	Long-chain-fatty-acid--CoA ligase 6	Acsl6	202960	NaN
P47856-2;P47856;D3YYD9	P47856-2;P47856	Glucosamine--fructose-6-phosphate aminotransferase [isomerizing] 1	Gfpt1	20000000	0.173934
A2APX2;P21460;A2APX3	A2APX2;P21460;A2APX3	Cystatin-C	Cst3	23100000	1.00304
P19973;P19973-2;A2A6J7;A2A6J4	P19973;P19973-2;A2A6J7;A2A6J4	Lymphocyte-specific protein 1	Lsp1	5558000	0.349638
P21300;Q5M9J9	P21300;Q5M9J9	Aldose reductase-related protein 1	Akr1b7	76300000	0.389014
P17710-3;Q6GQU1;P17710;F8WIP2;P17710-4;G3UVV4;P17710-2;D3Z365;D3YYR4;D3Z105	P17710-3;Q6GQU1;P17710;F8WIP2;P17710-4;G3UVV4;P17710-2	Hexokinase-1	Hk1	49700000	0.548908
P20152;Q5FWJ3;E9PZV5	P20152;Q5FWJ3;E9PZV5	Vimentin	Vim	3640000000	1.67752
B1AVH5;B1AVH4;Q8C0P5	B1AVH5;B1AVH4;Q8C0P5	Coronin-2A	Coro2a	594130	0.056262
Q62048;Q62048-2;D3Z375	Q62048;Q62048-2;D3Z375	Astrocytic phosphoprotein PEA-15	Pea15;Pea15a	38500000	0.882768
Q8BG13;O89086;Q545K5;Q5RJV3	Q8BG13;O89086;Q545K5;Q5RJV3	Putative RNA-binding protein 3	Rbm3	25500000	0.795418
Q6URW6;D3Z5V8	Q6URW6	Myosin-14	Myh14	53000000	0.184301
Q7M758	Q7M758	N-acetylated-alpha-linked acidic dipeptidase-like protein	Naaladl1	168400	NaN
P10107;Q4FJV4	P10107;Q4FJV4	Annexin A1;Annexin	Anxa1	106000000	0.465831
P12023;Q3TWF3;P12023-2;Q6GR78;E9PWY4;E9QL91;P12023-3	P12023;Q3TWF3;P12023-2;Q6GR78;E9PWY4;E9QL91;P12023-3	Amyloid beta A4 protein;N-APP;Soluble APP-alpha;Soluble APP-beta;C99;Beta-amyloid protein 42;Beta-amyloid protein 40;C83;P3(42);P3(40);C80;Gamma-secretase C-terminal fragment 59;Gamma-secretase C-terminal fragment 57;Gamma-secretase C-terminal fragment 50;C31	App	1655400	0.286886
P07356;Q542G9;B0V2N5;B0V2N7;B0V2N8	P07356;Q542G9;B0V2N5	Annexin A2;Annexin	Anxa2	410000000	0.345913
Q00612;Q790Y8;A3KG36	Q00612;Q790Y8;A3KG36	Glucose-6-phosphate 1-dehydrogenase X;Glucose-6-phosphate 1-dehydrogenase	G6pdx	12400000	0.174347
O88322	O88322	Nidogen-2	Nid2	53000000	0.789702
E9Q616;F7BRM2;G5E8I9;Q8R2L7;G5E8K8	E9Q616;F7BRM2		Ahnak	914000000	0.531519
P29452	P29452	Caspase-1;Caspase-1 subunit p20;Caspase-1 subunit p10	Casp1	4641500	0.447227
Q9JL62;D3Z1H9;D3Z1H8	Q9JL62;D3Z1H9;D3Z1H8	Glycolipid transfer protein	Gltp	763600	0.12333
P08905	P08905	Lysozyme C-2	Lyz2	2584400	0.172141
E9PV16;Q68FL4;F8WGT1;E9PX77;E9Q0D6	E9PV16;Q68FL4;F8WGT1	Adenosylhomocysteinase;Putative adenosylhomocysteinase 3	Ahcyl2	4909400	0.139823
P06728	P06728	Apolipoprotein A-IV	Apoa4	997000000	3.72689
Q8K354	Q8K354	Carbonyl reductase [NADPH] 3	Cbr3	4512300	0.271857
A2AUK5;Q9Z2H5;E9QMK1	A2AUK5;Q9Z2H5	Band 4.1-like protein 1	Epb4.1l1;Epb41l1	4847400	0.327279
Q7TSJ2;Q7TSJ2-2;D3Z6W1;Q7TSJ2-3	Q7TSJ2	Microtubule-associated protein 6	Map6	23800000	0.368338
A2AHZ1;Q9QZA0	A2AHZ1;Q9QZA0	Carbonic anhydrase 5B, mitochondrial	Car5b;Ca5b	453190	0.14718
Q5SSL4-4;Q5SSL4-2;Q5SSL4;E9PUE7;Q5SSL4-3;H3BKV6;H3BKT3;H3BJY3	Q5SSL4-4;Q5SSL4-2;Q5SSL4;E9PUE7;Q5SSL4-3	Active breakpoint cluster region-related protein	Abr	5955500	0.262295
P19324	P19324	Serpin H1	Serpinh1	549000000	1.01212
B2RRE0;Q9WTQ5;Q9WTQ5-2;F8WI21	B2RRE0;Q9WTQ5;Q9WTQ5-2	A-kinase anchor protein 12	Akap12	43800000	0.559315
A2ALW3;Q91YR9	A2ALW3;Q91YR9	Prostaglandin reductase 1	Ptgr1	59700000	0.169506
Q5SRX1;Q5SRX1-2;Q5SXA4;Q5SXA5;Q5SRX1-4;Q5SRX1-3;Q5SRX1-5;F6ZDJ1;F6RBX1	Q5SRX1;Q5SRX1-2;Q5SXA4;Q5SXA5;Q5SRX1-4;Q5SRX1-3;Q5SRX1-5;F6ZDJ1;F6RBX1	TOM1-like protein 2	Tom1l2	7435300	1.09615
Q6R891;Q6R891-2	Q6R891;Q6R891-2	Neurabin-2	Ppp1r9b	1498800	0.179421
O08553	O08553	Dihydropyrimidinase-related protein 2	Dpysl2	131000000	0.336746
Q32MD7;Q9CQE5;D3Z1B6	Q32MD7;Q9CQE5	Regulator of G-protein signaling 10	Rgs10	14400000	0.832778
Q63918	Q63918	Serum deprivation-response protein	Sdpr	890000000	3.69727
Q9JMG7-2;Q9JMG7	Q9JMG7-2;Q9JMG7	Hepatoma-derived growth factor-related protein 3	Hdgfrp3	56200000	0.364711
A2AAJ9;H7BX05;F6TJX7;A2AAJ9-3	A2AAJ9;H7BX05	Obscurin	Obscn	29300000	1.5897
O88512;D6RFT7	O88512;D6RFT7	AP-1 complex subunit gamma-like 2	Ap1g2	275100	0.0675539
Q9Z2Y3;Q9Z2Y3-3;Q9Z2Y3-2;E9Q0J0;D3Z6A7;D3Z6A9;Q9Z2Y3-4;Q3UVL6;D3Z6A8;Q5D052;Q9Z2Y3-5;E9Q0J1	Q9Z2Y3;Q9Z2Y3-3;Q9Z2Y3-2;E9Q0J0;D3Z6A7	Homer protein homolog 1	Homer1	26400000	1.0289
Q61001;E9Q6Y5	Q61001;E9Q6Y5	Laminin subunit alpha-5	Lama5	1424300	0.157364
Q99LB4;P24452;D3YTL5;D3YU77;D3YZN3;D3Z4K5;D3Z014	Q99LB4;P24452;D3YTL5	Macrophage-capping protein	Capg	86500000	0.477897
Q9Z0H8;Q9Z0H8-2	Q9Z0H8;Q9Z0H8-2	CAP-Gly domain-containing linker protein 2	Clip2	2278400	0.185974
B2RQP1;Q05921;Q3T9T6	B2RQP1;Q05921	2-5A-dependent ribonuclease	Rnasel	39630	NaN
Q8BTM8;B7FAU9;B7FAV1;F6XC15;Q8BTM8-2;F6Z2C0;F7AVL7	Q8BTM8;B7FAU9;B7FAV1	Filamin-A	Flna	216000000	0.23581
Q9JLB4	Q9JLB4	Cubilin	Cubn	2929700	0.124093
Q9WVA4	Q9WVA4	Transgelin-2	Tagln2	375000000	0.709975
Q8BMF3;E9PZP7;E9PWR8	Q8BMF3	NADP-dependent malic enzyme, mitochondrial	Me3	39000000	2.33492
Q9DCZ1;F6VY18	Q9DCZ1;F6VY18	GMP reductase 1	Gmpr	51100000	1.73121
E9Q1F5	E9Q1F5		Myo5c	0	NaN
P48025;Q3UPF7;E9PWE9	P48025;Q3UPF7;E9PWE9	Tyrosine-protein kinase SYK	Syk	25800000	0.3151
B2KGB7;Q9DBG9;B1AUD9	B2KGB7;Q9DBG9	Tax1-binding protein 3	Tax1bp3	83900000	1.27324
Q3UKW2;P62204	Q3UKW2;P62204	Calmodulin	Calm1	264000000	0.650237
F7DEU6;P50096;E0CYE2;E0CXK0;F6XXH9	F7DEU6;P50096;E0CYE2	Inosine-5-monophosphate dehydrogenase;Inosine-5-monophosphate dehydrogenase 1	Impdh1	1626600	0.246828
Q3TJC2;Q61205;Q8CA83;D3Z2X5;D3Z7E6	Q3TJC2;Q61205;Q8CA83;D3Z2X5;D3Z7E6	Platelet-activating factor acetylhydrolase IB subunit gamma	Pafah1b3	784410	0.232943
Q9D154;Q5SV42	Q9D154	Leukocyte elastase inhibitor A	Serpinb1a	126000000	0.150959
O08804;F7B9A0	O08804;F7B9A0		Serpinb6b	40300000	0.702691
Q61292	Q61292	Laminin subunit beta-2	Lamb2	12000000	0.642591
Q3V0K9;D3Z6J7	Q3V0K9	Plastin-1	Pls1	53500000	0.141701
Q9Z0L8;F8WHZ6;Q9Z0L8-2	Q9Z0L8;F8WHZ6;Q9Z0L8-2	Gamma-glutamyl hydrolase	Ggh	5318300	0.460426
B1AVE8;Q8R550-3;Q3TA88;Q8R550-2;E9Q0C1;Q8R550-8;B1AZ85	B1AVE8;Q8R550-3;Q3TA88;Q8R550-2;E9Q0C1;Q8R550-8		Sh3kbp1	28700000	0.259666
E9Q4M4;Q91VN4;Q3TJS8	E9Q4M4;Q91VN4;Q3TJS8	Coiled-coil-helix-coiled-coil-helix domain-containing protein 6, mitochondrial	Chchd6	6941100	0.630398
Q9D1K2;F7B2B4	Q9D1K2	V-type proton ATPase subunit F	Atp6v1f	8269000	0.320893
P01872;P01873	P01872;P01873	Ig mu chain C region secreted form;Ig mu chain C region membrane-bound form	Igh-6	19800000	0.428908
Q8K221	Q8K221	Arfaptin-2	Arfip2	1127700	0.133536
G3XA41;Q9CQV6	G3XA41;Q9CQV6	Microtubule-associated proteins 1A/1B light chain 3B	Gm6055;Map1lc3b	8649600	0.561735
O08539	O08539	Myc box-dependent-interacting protein 1	Bin1	8251700	0.213767
P60824;D3YU80	P60824;D3YU80	Cold-inducible RNA-binding protein	Cirbp	7540000	0.703185
A2ASS6;A2ASS6-2;E9Q8M7;F6ZVZ7;F6Q6Z0	A2ASS6;A2ASS6-2;E9Q8M7;F6ZVZ7	Titin	Ttn	4150000000	5.1784
Q9D6R2;Q9D6R2-2	Q9D6R2;Q9D6R2-2	Isocitrate dehydrogenase [NAD] subunit alpha, mitochondrial	Idh3a	1530000000	2.29985
F6UVY2;O08739;D3Z4N3;F6XQD0;D3YU73	F6UVY2;O08739	AMP deaminase 3	Ampd3	2352500	0.261725
P30412;Q3UC73	P30412;Q3UC73	Peptidyl-prolyl cis-trans isomerase C;Peptidyl-prolyl cis-trans isomerase	Ppic	2566600	0.274672
G5E895;D3Z494	G5E895;D3Z494		Akr1b10	64800000	1.80093
Q61739-2;Q8CC06;Q61739;F8WI09;F6VSK8	Q61739-2;Q8CC06;Q61739;F8WI09;F6VSK8	Integrin alpha-6;Integrin alpha-6 heavy chain;Integrin alpha-6 light chain	Itga6	8933100	0.436662
Q0VBA4;Q9D7S7;Q9D7S7-2	Q0VBA4;Q9D7S7;Q9D7S7-2	60S ribosomal protein L22-like 1	Rpl22l1	1867800	0.100072
O88622;G3X8U8;O88622-2;A5YBK2;E9Q088	O88622;G3X8U8;O88622-2;A5YBK2;E9Q088	Poly(ADP-ribose) glycohydrolase	Parg	509210	NaN
A2AM79;P56389	A2AM79;P56389	Cytidine deaminase	Cda	1139100	0.127702
E9Q0H6;P51880	E9Q0H6;P51880	Fatty acid-binding protein, brain	Fabp7	1480700	0.155101
Q8BH61;Q3TQH1;Q3TC79;E9QA31	Q8BH61	Coagulation factor XIII A chain	F13a1	6063900	0.584317
A2AQR0;Q64521	A2AQR0;Q64521	Glycerol-3-phosphate dehydrogenase, mitochondrial	Gpd2	87900000	0.155456
P60840;P60840-2;P60840-3	P60840;P60840-2;P60840-3	Alpha-endosulfine	Ensa	25600000	0.837591
P16014;Q3TY66;E9Q957	P16014;Q3TY66;E9Q957	Secretogranin-1;CCB peptide	Chgb	4187100	0.318026
Q08093;Q543F3;D3Z7R6	Q08093;Q543F3;D3Z7R6	Calponin-2	Cnn2	19400000	0.571102
P14873;Q3UPV4	P14873	Microtubule-associated protein 1B;MAP1 light chain LC1	Map1b	10100000	0.194269
Q8R3B1	Q8R3B1	1-phosphatidylinositol 4,5-bisphosphate phosphodiesterase delta-1	Plcd1	2522600	0.436148
P56546-2;P56546;Q3UGL5;Q91YZ2;E9PWQ9;E9Q0T4	P56546-2;P56546;Q3UGL5;Q91YZ2;E9PWQ9;E9Q0T4	C-terminal-binding protein 2	Ctbp2	3359500	0.279916
Q9R1T4;Q9R1T4-3;Q9R1T4-2;A2A3W1	Q9R1T4;Q9R1T4-3;Q9R1T4-2	Septin-6	2020-09-06	1421100	0.139171
E9Q9G6;Q6TA13;G3UW47;P33173;E9QAN4;Q5DTN3;A2AH75;Q60575-3	E9Q9G6;Q6TA13;G3UW47;P33173;E9QAN4;Q5DTN3	Kinesin-like protein KIF1A	Kif1a	81900000	4.2061
P35802;Q542P2	P35802;Q542P2	Neuronal membrane glycoprotein M6-a	Gpm6a	460870	NaN
Q62009-2;Q62009-5;Q62009;Q62009-3;Q62009-4;CON__Q2KJC7;F7C9H0	Q62009-2;Q62009-5;Q62009;Q62009-3;Q62009-4	Periostin	Postn	10600000	0.45556
B2RUR8	B2RUR8		Otud7b	2360500	0.584898
P47968	P47968	Ribose-5-phosphate isomerase	Rpia	21100000	1.05679
F6TQW2;P01864	F6TQW2;P01864	Ig gamma-2A chain C region secreted form	Ighg2c	18600000	0.574977
P54923;Q3U5N4	P54923;Q3U5N4	[Protein ADP-ribosylarginine] hydrolase	Adprh	18700000	0.723746
Q9D8S3	Q9D8S3	ADP-ribosylation factor GTPase-activating protein 3	Arfgap3	1958200	0.089222
Q62219;Q62219-4;Q62219-2;E9Q1D5;Q62219-6;Q62219-3;Q62219-5;E9PYQ1;Q62219-9;E9QKN0;Q62219-10;Q62219-7;E9Q1V4;Q62219-8	Q62219;Q62219-4;Q62219-2;E9Q1D5;Q62219-6	Transforming growth factor beta-1-induced transcript 1 protein	Tgfb1i1	1633800	0.355872
Q9Z0P5;Q9Z0P5-2	Q9Z0P5;Q9Z0P5-2	Twinfilin-2	Twf2	45600000	0.919033
G3UW73;P45376;Q3UDY1;F8WJG5;D3YVJ7	G3UW73;P45376;Q3UDY1	Aldose reductase	Gm6736;Akr1b1;Akr1b3	1320000000	1.90527
H3BJ07;H3BJ82;Q8R088;H3BKI7;Q8R088-2;H3BJ12;Q8R088-3;H3BJI3;H3BJN5	H3BJ07;H3BJ82;Q8R088;H3BKI7;Q8R088-2;H3BJ12;Q8R088-3;H3BJI3	Golgi phosphoprotein 3-like	Golph3l	1272600	0.439715
Q9CQZ1	Q9CQZ1	Heat shock factor-binding protein 1	Hsbp1	13300000	0.51443
P52624;Q5SUC8;E9Q5K7;Q5SUC6;E9Q391;F6YBT6	P52624;Q5SUC8;E9Q5K7;Q5SUC6;E9Q391;F6YBT6	Uridine phosphorylase 1	Upp1	524660	NaN
P06837	P06837	Neuromodulin	Gap43	816170	NaN
P30681;E9PYZ6	P30681	High mobility group protein B2	Hmgb2	98600000	0.36519
Q9ERD7	Q9ERD7	Tubulin beta-3 chain	Tubb3	7337800	0.218909
Q9WUB3;E9PUM3	Q9WUB3;E9PUM3	Glycogen phosphorylase, muscle form;Phosphorylase	Pygm	260000000	1.74089
P97822;P97822-2;E9Q0X5;E9PZF5;E9Q5H2;E9Q5H9;E9Q2G1	P97822;P97822-2;E9Q0X5;E9PZF5;E9Q5H2	Acidic leucine-rich nuclear phosphoprotein 32 family member E	Anp32e	15900000	0.223169
Q542F1;Q9Z1Q5	Q542F1;Q9Z1Q5	Chloride intracellular channel protein 1	Clic1	44900000	0.229064
P55050;Q53YP5	P55050;Q53YP5	Fatty acid-binding protein, intestinal	Fabp2	6561000	0.0686012
B7ZCI2;B7ZCI3;Q0II04;Q8BWC6;F6RM14	B7ZCI2;B7ZCI3;Q0II04;Q8BWC6	Nebulette	Nebl	1750000000	37.896
Q544F6;Q9CQI6	Q544F6;Q9CQI6	Coactosin-like protein	Cotl1	43400000	0.196885
P70404;Q3TGZ3;Q3TKM5	P70404;Q3TGZ3;Q3TKM5	Isocitrate dehydrogenase [NAD] subunit gamma 1, mitochondrial	Idh3g	542000000	1.68948
Q8K0U4	Q8K0U4	Heat shock 70 kDa protein 12A	Hspa12a	56757	0.0900333
E9Q4B9;E9Q827;P56212;P56212-2;E9PXD7	E9Q4B9;E9Q827;P56212;P56212-2	cAMP-regulated phosphoprotein 19	Arpp19	22200000	0.969274
P03958;Q4FK28	P03958;Q4FK28	Adenosine deaminase	Ada	16100000	0.181287
P70460	P70460	Vasodilator-stimulated phosphoprotein	Vasp	7186600	0.390016
Q9DCL8;D3Z3A0	Q9DCL8;D3Z3A0	Protein phosphatase inhibitor 2	Ppp1r2	52500000	1.75985
F7AA26;A2API8;O54931;O54931-2;O54931-4;O54931-5;A2APJ2;O54931-3;F8WH21;A2API9;A2APJ1	F7AA26;A2API8;O54931;O54931-2;O54931-4;O54931-5;A2APJ2;O54931-3;F8WH21	A-kinase anchor protein 2	Gm20459;Akap2	38300000	0.447107
Q9DAM7	Q9DAM7	UPF0444 transmembrane protein C12orf23 homolog		5942400	0.642674
Q9WTR5;F6QTN3	Q9WTR5;F6QTN3	Cadherin-13	Cdh13	180000000	15.1761
Q3TM70;Q9EQP2	Q3TM70;Q9EQP2	EH domain-containing protein 4	Ehd4	127000000	1.27273
Q3V3R1	Q3V3R1	Monofunctional C1-tetrahydrofolate synthase, mitochondrial	Mthfd1l	284180	NaN
P97300-3	P97300-3			2417800	0.366461
Q3U3B7;Q91UZ5	Q3U3B7;Q91UZ5	Inositol monophosphatase 2	Impa2	5998100	0.732225
O09043;Q3U7H1	O09043;Q3U7H1	Napsin-A	Napsa	330730	0.103344
Q60605;Q60605-2;Q642K0;E9QLM0	Q60605;Q60605-2;Q642K0;E9QLM0	Myosin light polypeptide 6	Myl6;Gm8894	536000000	0.255122
Q8R001;Q8R001-2;E9Q6X0;D3YYK8;Q3TG90;E9Q1B7	Q8R001;Q8R001-2;E9Q6X0;D3YYK8;Q3TG90	Microtubule-associated protein RP/EB family member 2	Mapre2	76100000	1.40217
Q61599;D3YWL7	Q61599	Rho GDP-dissociation inhibitor 2	Arhgdib	68300000	0.443833
Q8R1F1;A2ARS6	Q8R1F1	Niban-like protein 1	Fam129b	1735000	NaN
P07214;Q5NCU5;Q5NCU4;Q5NCU3	P07214;Q5NCU5;Q5NCU4;Q5NCU3	SPARC	Sparc	2798800	0.485248
Q62507	Q62507	Cochlin	Coch	179000000	10.5061
B2RRX2;P63328;P63328-2;Q4V9X0;Q80XK0;P48455;Q3V074;G3X8V4	B2RRX2;P63328;P63328-2	Serine/threonine-protein phosphatase;Serine/threonine-protein phosphatase 2B catalytic subunit alpha isoform	Ppp3ca	4959300	0.210062
O35639	O35639	Annexin A3	Anxa3	160000000	0.758265
P63011;Q0PD63;D3YZP5	P63011;Q0PD63	Ras-related protein Rab-3A	Rab3a	5136900	0.202605
Q61553;F7BDR1;D3Z1X1;D3YWW3	Q61553;F7BDR1;D3Z1X1	Fascin	Fscn1	3281100	0.360321
Q91YS4;D3YXZ3;E9QL75;O88448;D3Z5Y7	Q91YS4;D3YXZ3;E9QL75;O88448	Kinesin light chain 2	Klc2	7046900	5.18888
Q91V77;P56565;D3YUT6	Q91V77;P56565	Protein S100-A1	S100a1	967000000	6.88326
Q9CRC9;Q9CRC9-2;D3YWR1;G3UXF5	Q9CRC9;Q9CRC9-2;D3YWR1;G3UXF5	Glucosamine-6-phosphate isomerase 2	Gnpda2	193870	NaN
P49710;E9Q4E5	P49710	Hematopoietic lineage cell-specific protein	Hcls1	87600000	0.461233
G3X8R0;Q60870	G3X8R0		Reep5	24400000	1.04038
Q3UFY7;Q3UFY7-2	Q3UFY7;Q3UFY7-2	Cytosolic 5-nucleotidase III-like protein	Nt5c3l	13200000	0.831947
P18524;P18526	P18524;P18526	Ig heavy chain V region RF;Ig heavy chain V region 345		104180	NaN
Q9DBX3;Q9DBX3-2;Q9DBX3-3	Q9DBX3;Q9DBX3-2;Q9DBX3-3	Sushi domain-containing protein 2	Susd2	1628100	0.304757
Q8BFT2	Q8BFT2	HAUS augmin-like complex subunit 4	Haus4	511000000	11.7607
P50518;Q9D593	P50518	V-type proton ATPase subunit E 1	Atp6v1e1	59700000	0.223259
P11152;E9Q0Z9	P11152;E9Q0Z9	Lipoprotein lipase	Lpl	25000000	3.21419
G3UWA6;P10852	G3UWA6;P10852	4F2 cell-surface antigen heavy chain	Slc3a2	2241900	0.123292
Q08509;Q3UGL1;D3Z5I5;D3Z7F4	Q08509;Q3UGL1	Epidermal growth factor receptor kinase substrate 8	Eps8	4119500	0.469263
A2AVY6;Q9CQ19	A2AVY6;Q9CQ19	Myosin regulatory light polypeptide 9	Myl9	230000000	0.611509
Q9QZM0	Q9QZM0	Ubiquilin-2	Ubqln2	25400000	0.694686
Q8R2R9	Q8R2R9	AP-3 complex subunit mu-2	Ap3m2	0	NaN
Q91VA7	Q91VA7		Idh3b	1870000000	2.70234
P04104	P04104	Keratin, type II cytoskeletal 1	Krt1	27600000	0.133177
P98078;E9QL31;P98078-2;P98078-3;Q3TRE6;E9PX84;F6TQN9;E0CXT5;Q9DCE6;E0CZ53;E0CYJ2	P98078;E9QL31;P98078-2;P98078-3;Q3TRE6;E9PX84;F6TQN9;E0CXT5;Q9DCE6	Disabled homolog 2	Dab2	14100000	0.236256
B1B1A8;Q6PDN3;Q6PDN3-3;Q6PDN3-2;Q8BJ10	B1B1A8;Q6PDN3;Q6PDN3-3;Q6PDN3-2	Myosin light chain kinase, smooth muscle;Myosin light chain kinase, smooth muscle, deglutamylated form	Mylk	51200000	0.158288
F8WGR0;F8WHZ9;Q9QYC0;Q9QYC0-2;E9Q1K3;F6RDR0;D3Z0T1;F6V4G5	F8WGR0;F8WHZ9;Q9QYC0;Q9QYC0-2;E9Q1K3	Alpha-adducin	Add1	10700000	0.412848
Q9JME5;E9Q1S6	Q9JME5	AP-3 complex subunit beta-2	Ap3b2	5971100	NaN
P26350;Q0VGU2	P26350;Q0VGU2	Prothymosin alpha;Thymosin alpha	Ptma	207000000	0.199896
F8WIV2;Q4FJQ6;Q60854;E9Q096;E9Q0P9;E9Q108;E9Q6X2;E9Q3Y1;E9PYY0;E9Q4R2;E9PZQ9;E9Q5Q5	F8WIV2;Q4FJQ6;Q60854;E9Q096	Serpin B6	Serpinb6a;Serpinb6	256000000	0.515278
O88329	O88329	Unconventional myosin-Ia	Myo1a	31600000	0.128181
P14733	P14733	Lamin-B1	Lmnb1	472000000	0.54939
E0CYV0;P23506-2;E9PWE0;F7D432;P23506;Q545L9;F6V9F1;F6TXE3	E0CYV0;P23506-2;E9PWE0;F7D432;P23506;Q545L9;F6V9F1	Protein-L-isoaspartate O-methyltransferase;Protein-L-isoaspartate(D-aspartate) O-methyltransferase	Pcmt1	474000000	1.93028
A2AF47;A2AF67	A2AF47;A2AF67	Dedicator of cytokinesis protein 11	Dock11	0	NaN
Q6IRU5;Q6IRU5-3	Q6IRU5	Clathrin light chain B	Cltb	178000000	0.970591
Q8BP71;Q8BP71-5;Q8BP71-2;G8JL50;Q8BP71-3;G8JL67;Q8BP71-8;Q8BP71-7;Q8BP71-6;G8JL79;Q8BP71-4;G8JL72;Q8BP71-9	Q8BP71;Q8BP71-5;Q8BP71-2;G8JL50;Q8BP71-3;G8JL67;Q8BP71-8;Q8BP71-7;Q8BP71-6;G8JL79;Q8BP71-4	RNA binding protein fox-1 homolog 2	Rbfox2	6477700	1.25224
F7AWB4;Q3TW96;Q3TW96-2	F7AWB4;Q3TW96;Q3TW96-2	UDP-N-acetylhexosamine pyrophosphorylase-like protein 1	Uap1l1	0	NaN
A8DUK4;E9Q223;P02089	A8DUK4;E9Q223		Hbb-b1	40300000000	7.5392
Q6IRU2	Q6IRU2	Tropomyosin alpha-4 chain	Tpm4	1020000000	2.92261
P50516;P50516-2;D3Z1B9;D3YWH3	P50516;P50516-2	V-type proton ATPase catalytic subunit A	Atp6v1a	33000000	0.17618
Q91VB8;F7CAE1;P01942	Q91VB8;F7CAE1;P01942	Hemoglobin subunit alpha	Hba-a1;Hba-a2;Hba	32500000000	9.9108
P47934;H7BX88;B7ZDD7;F7BF80;A2AWJ5	P47934;H7BX88	Carnitine O-acetyltransferase	Crat	270000000	1.32894
A2AQL0;Q9Z1W9	A2AQL0;Q9Z1W9	STE20/SPS1-related proline-alanine-rich protein kinase	Stk39	4679100	0.253962
Q91YH6	Q91YH6		Atp6v1b1	523370	NaN
Q9D8B3	Q9D8B3	Charged multivesicular body protein 4b	Chmp4b	43100000	1.33989
Q923T9;Q923T9-2	Q923T9;Q923T9-2	Calcium/calmodulin-dependent protein kinase type II subunit gamma	Camk2g	1628600	0.459664
Q8BP92	Q8BP92	Reticulocalbin-2	Rcn2	7405400	0.617627
Q9R0X4;Q32MW3	Q9R0X4	Acyl-coenzyme A thioesterase 9, mitochondrial	Acot9	64400000	0.966277
B1AQZ0;B1AQY9;B7ZC46;Q8CHH9-2;B1AQY8;Q8CHH9;F7C5C1	B1AQZ0;B1AQY9;B7ZC46;Q8CHH9-2;B1AQY8;Q8CHH9	Septin-8	2020-09-08	45800000	0.706265
Q8BHN1;Q8BHN1-3;Q3TT61;Q8BHN1-2;E9Q249;A2AFJ4	Q8BHN1;Q8BHN1-3	Gamma-taxilin	Txlng	23900000	6.73718
B1B1C8;P16054	B1B1C8;P16054	Protein kinase C epsilon type	Prkce	0	NaN
Q91Z31-2;Q91Z31	Q91Z31-2;Q91Z31	Polypyrimidine tract-binding protein 2	Ptbp2	7434700	0.805477
G5E8R1;E9Q455	G5E8R1;E9Q455		Tpm1	9906700	0.522057
Q05816;Q497I3;E9Q964	Q05816;Q497I3;E9Q964	Fatty acid-binding protein, epidermal	Fabp5	305000000	0.464468
Q78IS1	Q78IS1	Transmembrane emp24 domain-containing protein 3	Tmed3	0	NaN
P09803	P09803	Cadherin-1;E-Cad/CTF1;E-Cad/CTF2;E-Cad/CTF3	Cdh1	3730400	0.197402
Q4FJL2;Q8K0T0	Q4FJL2;Q8K0T0	Reticulon-1	Rtn1	571380	0.254033
Q3TPZ5;Q99KJ8	Q3TPZ5;Q99KJ8	Dynactin subunit 2	Dctn2	317000000	1.32245
P63260;Q4KL81;E9Q607;B1ATY1;G3UYG0	P63260;Q4KL81;E9Q607;B1ATY1;G3UYG0	Actin, cytoplasmic 2;Actin, cytoplasmic 2, N-terminally processed	Actg1	16200000	0.141581
Q9JHU9	Q9JHU9	Inositol-3-phosphate synthase 1	Isyna1	6543200	0.296895
Q0VF55;A2ALL9;Q8C048;Q0VF54	Q0VF55;A2ALL9;Q8C048;Q0VF54		Atp2b3	860000000	10.6113
A2AWQ5;Q8CI94	A2AWQ5;Q8CI94	Phosphorylase;Glycogen phosphorylase, brain form	Pygb	147000000	1.20328
Q921M7	Q921M7	Protein FAM49B	Fam49b	532900	0.110075
Q921K8	Q921K8	Protein FAM115C	Fam115c	0	NaN
A7VMV2;Q99KP3;Q9D221	A7VMV2;Q99KP3	Lambda-crystallin homolog	Cryl1	4166900	0.127457
P84075;E9PV73;A2A7R5;A2A7R6	P84075;E9PV73;A2A7R5	Neuron-specific calcium-binding protein hippocalcin	Hpca	1188500	NaN
Q8K212;Q3TP27	Q8K212;Q3TP27	Phosphofurin acidic cluster sorting protein 1	Pacs1	365300	0.286139
Q8BJD1	Q8BJD1	Inter-alpha-trypsin inhibitor heavy chain H5	Itih5	138280	0.125428
Q80UP5;F7B209	Q80UP5;F7B209	Ankyrin repeat domain-containing protein 13A	Ankrd13a	1001300	0.255167
P06800;P06800-2;P06800-3;F8WGC7;F8WHG6	P06800;P06800-2;P06800-3;F8WGC7;F8WHG6	Receptor-type tyrosine-protein phosphatase C	Ptprc	2936400	0.133912
P14434;P14438;E9Q665;G3UWR9;P01910;P04228;P23150;P14435;P14436;P14437;P04227	P14434;P14438;E9Q665;G3UWR9	H-2 class II histocompatibility antigen, A-B alpha chain;H-2 class II histocompatibility antigen, A-U alpha chain	H2-Aa	3787800	0.154919
P04441;Q3U4Q8;P04441-2;Q545Y5	P04441;Q3U4Q8;P04441-2;Q545Y5	H-2 class II histocompatibility antigen gamma chain	Cd74	2447100	0.191744
O54962	O54962	Barrier-to-autointegration factor	Banf1	111000000	0.428467
Q9Z0H4-6;Q9Z0H4-2;Q9Z0H4-9;Q9Z0H4-8;Q9Z0H4;F6V6I8;Q9Z0H4-4;Q9Z0H4-5;Q9Z0H4-7;E9QA47;Q9Z0H4-11;A3KGT2;A3KGT0;Q9Z0H4-3	Q9Z0H4-6;Q9Z0H4-2;Q9Z0H4-9;Q9Z0H4-8;Q9Z0H4;F6V6I8;Q9Z0H4-4;Q9Z0H4-5;Q9Z0H4-7;E9QA47;Q9Z0H4-11;A3KGT2;A3KGT0	CUGBP Elav-like family member 2	Celf2	10500000	0.436853
Q3U5C8;B1ASH7;B1ASH8	Q3U5C8	Rho guanine nucleotide exchange factor 16	Arhgef16	43900000	NaN
O55057;Q3TDQ8	O55057;Q3TDQ8	Retinal rod rhodopsin-sensitive cGMP 3,5-cyclic phosphodiesterase subunit delta	Pde6d	11600000	0.993049
Q9Z1E4;D3Z0Q6	Q9Z1E4;D3Z0Q6	Glycogen [starch] synthase, muscle	Gys1	5858300	0.651636
Q91YN9	Q91YN9	BAG family molecular chaperone regulator 2	Bag2	106000000	2.91852
Q5M8N4;Q5M8N4-2	Q5M8N4;Q5M8N4-2	Epimerase family protein SDR39U1	Sdr39u1	69900000	3.01305
P68369	P68369	Tubulin alpha-1A chain	Tuba1a	11100000	0.208947
Q8BHT6;Q8BHT6-2	Q8BHT6	Beta-1,3-glucosyltransferase	B3galtl	203680	NaN
G5E8F7;Q9CXL3	G5E8F7;Q9CXL3	Uncharacterized protein C7orf50 homolog	3110082I17Rik	113890	NaN
Q3V0T8;Q9WTN0;Q9CZZ6	Q3V0T8;Q9WTN0;Q9CZZ6	Geranylgeranyl pyrophosphate synthase	Ggps1	2019700	0.534217
P61957;D3Z794;H7BWX9	P61957;D3Z794;H7BWX9	Small ubiquitin-related modifier 2	Sumo2	53100000	0.670691
A2AVR9;P62627	A2AVR9;P62627	Dynein light chain roadblock-type 1	Dynlrb1	49800000	1.02484
Q60949;Q3U3T9;Q60949-2;F6QUA9;E9Q6L4;Q3TGE9;D6RGQ5	Q60949;Q3U3T9;Q60949-2;F6QUA9;E9Q6L4;Q3TGE9	TBC1 domain family member 1	Tbc1d1	1857300	0.4537
P39053-3;F6W8Z8;D6RH60	P39053-3			57500000	0.288642
Q99J77	Q99J77		Nans	83900000	0.214583
Q05BC3;E9Q6W7;Q05BC3-2;Q05BC3-3;D3Z4J9;D6RII3	Q05BC3;E9Q6W7;Q05BC3-2;Q05BC3-3;D3Z4J9;D6RII3	Echinoderm microtubule-associated protein-like 1	Eml1	240000000	0.659718
P00687;E9Q1A2;D3YYQ5;CON__Q3MHH8	P00687;E9Q1A2;D3YYQ5	Alpha-amylase 1	Amy1	0	NaN
P17156	P17156	Heat shock-related 70 kDa protein 2	Hspa2	20300000	0.557756
P70290;Q542P4;B7ZCL8;A2AN84;B7ZCL9;E9Q7B7;B7ZCM0;B7ZCM1;D6RFD5	P70290;Q542P4;B7ZCL8;A2AN84	55 kDa erythrocyte membrane protein	Mpp1	37500000	0.439464
P21107;D3YVR0	P21107	Tropomyosin alpha-3 chain	Tpm3	2990000000	0.424304
P62874;Q3TQ70;H3BKR2;H3BLF7	P62874;Q3TQ70;H3BKR2;H3BLF7	Guanine nucleotide-binding protein G(I)/G(S)/G(T) subunit beta-1	Gnb1	76900000	0.307465
P43404;P43404-2;P43404-3;E9QM15	P43404	Tyrosine-protein kinase ZAP-70	Zap70	3458400	NaN
Q60997;Q60997-3;E9QMD4;Q60997-4;E9QPG8;Q60997-2	Q60997;Q60997-3;E9QMD4;Q60997-4;E9QPG8;Q60997-2	Deleted in malignant brain tumors 1 protein	Dmbt1	0	NaN
Q8CD76;D3Z5T6;Q7TNF4;E9Q7C9;E9QKS0;E9QM07;Q5UE59;O88447;F6UYN4	Q8CD76;D3Z5T6;Q7TNF4;E9Q7C9;E9QKS0;E9QM07;Q5UE59;O88447	Kinesin light chain 1	Klc1	17600000	0.325425
A2A3Z8;Q05186	A2A3Z8;Q05186	Reticulocalbin-1	Rcn1	37900000	0.958313
B1AR88;Q8BGB5	B1AR88;Q8BGB5	LIM domain-containing protein 2	Limd2	279630	NaN
P97311;Q542I2;Q3ULG5	P97311;Q542I2;Q3ULG5	DNA replication licensing factor MCM6	Mcm6	1359800	0.119124
P62814	P62814	V-type proton ATPase subunit B, brain isoform	Atp6v1b2	51900000	0.152929
Q91ZP3;E9QKQ5;Q91ZP3-2	Q91ZP3;E9QKQ5;Q91ZP3-2	Phosphatidate phosphatase LPIN1	Lpin1	305320	NaN
E9QJS7;Q9Z0M6;E9QMJ5;Q9Z0M6-3;Q9Z0M6-2;Q9DC42	E9QJS7;Q9Z0M6;E9QMJ5;Q9Z0M6-3;Q9Z0M6-2;Q9DC42	CD97 antigen	Cd97	1994300	0.441443
Q62280;Q6P1I1;E9Q9S9;Q8BKL1	Q62280;Q6P1I1;E9Q9S9;Q8BKL1	Protein SSXT	Ss18	8731100	12.5389
E9QMV2;Q4KML4	E9QMV2;Q4KML4	Costars family protein ABRACL	3110003A17Rik;Abracl	66600000	1.17989
Q5UAK0-1;B1AY32;Q5UAK0-2;Q32P49;Q5UAK0;Q5UAK0-4;Q5UAK0-5	Q5UAK0-1;B1AY32;Q5UAK0-2;Q32P49;Q5UAK0;Q5UAK0-4;Q5UAK0-5	Mesoderm induction early response protein 1	Mier1	43300000	3.37826
P68404-2;P68404	P68404-2;P68404	Protein kinase C beta type	Prkcb	347600	0.113555
Q91X97;D3YVA2;D3Z2Z8;D3Z1M0	Q91X97;D3YVA2;D3Z2Z8	Neurocalcin-delta	Ncald	2478000	0.152877
Q91VR8	Q91VR8	Protein BRICK1	Brk1	3552800	0.345901
P14094;Q545P0	P14094;Q545P0	Sodium/potassium-transporting ATPase subunit beta-1	Atp1b1	113000000	0.343265
P68510;E9Q4V8	P68510	14-3-3 protein eta	Ywhah	171000000	0.528039
F8WHW6;O70161;O70161-3;O70161-2;E0CYP4;F7C0X9;F8WIX5;P70182;F8WI18;D3YUY3;F8WIX4;P70182-2;F6SMP3	F8WHW6;O70161;O70161-3;O70161-2	Phosphatidylinositol 4-phosphate 5-kinase type-1 gamma	Pip5k1c	789610	0.244936
B1ASF5;Q64519	B1ASF5;Q64519	Syndecan;Syndecan-3	Sdc3	0	NaN
Q3U4H0;Q61166	Q3U4H0;Q61166	Microtubule-associated protein RP/EB family member 1	Mapre1	118000000	0.644745
Q08857;Q3UAI3	Q08857;Q3UAI3	Platelet glycoprotein 4	Cd36	192000000	1.17483
Q9D0J4	Q9D0J4	ADP-ribosylation factor-like protein 2	Arl2	3204500	0.469461
P25799;P25799-3;P25799-2;P25799-4;P25799-5;F6Z9G5;P25799-6;P25799-7	P25799;P25799-3;P25799-2;P25799-4	Nuclear factor NF-kappa-B p105 subunit;Nuclear factor NF-kappa-B p50 subunit	Nfkb1	121000000	14.5321
D3YZD8;D3Z442;Q8R0P4;D3YWY5;D3Z1Q3;Q8R0P4-2;Q8CF11;D3YX09;D3YY39	D3YZD8;D3Z442;Q8R0P4;D3YWY5;D3Z1Q3;Q8R0P4-2	UPF0366 protein C11orf67 homolog	1810020D17Rik	22400000	2.12567
B1AW58;Q8BW96;Q8BW96-2;B1AW57;Q8BW96-3;Q3TDM2	B1AW58;Q8BW96;Q8BW96-2;B1AW57;Q8BW96-3;Q3TDM2	Calcium/calmodulin-dependent protein kinase type 1D	Camk1d	621030	0.134307
Q80TY0;A2AQ41;A2AQ45;A2AQ42;A2AQ44;A2AQ43;Q80TY0-3;Q80TY0-2;D3YYV4;Q80TY0-4;Q80TY0-5;F6VVN1;A2AQ39	Q80TY0;A2AQ41;A2AQ45;A2AQ42;A2AQ44;A2AQ43;Q80TY0-3;Q80TY0-2;D3YYV4;Q80TY0-4;Q80TY0-5;F6VVN1	Formin-binding protein 1	Fnbp1	1689600	0.273052
P35486;Q3UFJ3	P35486;Q3UFJ3	Pyruvate dehydrogenase E1 component subunit alpha, somatic form, mitochondrial	Pdha1	1250000000	2.08043
Q9D0A3	Q9D0A3	UPF0552 protein C15orf38 homolog		13000000	0.485154
O35954;D3YXW5	O35954	Membrane-associated phosphatidylinositol transfer protein 1	Pitpnm1	339060	NaN
P43276;Q5T003	P43276;Q5T003	Histone H1.5	Hist1h1b	980770	0.170219
Q64133	Q64133	Amine oxidase [flavin-containing] A	Maoa	28400000	0.176047
Q9DCJ9	Q9DCJ9	N-acetylneuraminate lyase	Npl	3944800	0.193461
Q9D051	Q9D051	Pyruvate dehydrogenase E1 component subunit beta, mitochondrial	Pdhb	2620000000	2.81706
G3UWD3;Q8JZV9;F6UPJ1	G3UWD3;Q8JZV9;F6UPJ1	3-hydroxybutyrate dehydrogenase type 2	Bdh2	440140	0.175886
Q544U7;Q9ERI2	Q544U7;Q9ERI2	Ras-related protein Rab-27A	Rab27a	295380	NaN
Q8BMK4	Q8BMK4	Cytoskeleton-associated protein 4	Ckap4	19100000	1.02028
Q9R0L6-2;Q9R0L6	Q9R0L6-2;Q9R0L6	Pericentriolar material 1 protein	Pcm1	7888400	0.617971
Q8CIH5	Q8CIH5	1-phosphatidylinositol 4,5-bisphosphate phosphodiesterase gamma-2	Plcg2	832830	0.192374
P03987;P03987-2	P03987;P03987-2	Ig gamma-3 chain C region		7700000	1.15616
P70429;E9PVP4;F8WJB9;P70429-2	P70429;E9PVP4;F8WJB9;P70429-2	Ena/VASP-like protein	Evl	1831300	0.243801
Q5NC05	Q5NC05	Transcription termination factor 2	Ttf2	0	NaN
Q06890;Q549A5;E9Q8Y5;E9PXG5;E9PUU2;E9Q2G2;E9Q9B8	Q06890;Q549A5;E9Q8Y5;E9PXG5;E9PUU2;E9Q2G2;E9Q9B8	Clusterin;Clusterin beta chain;Clusterin alpha chain;Clusterin	Clu	194000000	2.09565
O54824;O54824-2	O54824;O54824-2	Pro-interleukin-16;Interleukin-16	Il16	679050	0.16293
P57746;Q3U861;F6XGK5;E9Q0D9	P57746;Q3U861;F6XGK5;E9Q0D9	V-type proton ATPase subunit D	Atp6v1d	12800000	0.403991
Q8N9S3;F6S1R2;Q8N9S3-2;Q8N9S3-3;A2AF81	Q8N9S3;F6S1R2;Q8N9S3-2;Q8N9S3-3	Activator of 90 kDa heat shock protein ATPase homolog 2	Ahsa2	0	NaN
A2AH25;Q5FWK3	A2AH25;Q5FWK3	Rho GTPase-activating protein 1	Arhgap1	14100000	0.189555
Q5SVL6;Q5SUE5	Q5SVL6	Rap1 GTPase-activating protein 2	Rap1gap2	316950	NaN
Q5M8N0;F7C0H6;Q5F272;Q9CW19	Q5M8N0;F7C0H6;Q5F272;Q9CW19	CB1 cannabinoid receptor-interacting protein 1	Cnrip1	3326900	0.179019
D3Z3N4;D3YWT1	D3Z3N4;D3YWT1		Hnrnph3	4347400	1.16244
Q99LD8;O08972;G3UZR0	Q99LD8	N(G),N(G)-dimethylarginine dimethylaminohydrolase 2	Ddah2	6437800	NaN
B7ZN52;E9PYP5	B7ZN52;E9PYP5		Lmo7	120000000	1.11681
Q91V12-2	Q91V12-2			36800000	0.514589
Q9D6T9	Q9D6T9		Mrps36	216000000	5.001
P01867;P01867-2	P01867;P01867-2	Ig gamma-2B chain C region	Igh-3	39600000	0.630915
B2RUC1;O54818	B2RUC1;O54818	Tumor protein D53	Tpd52l1	600370	NaN
E9Q6Q4;E9Q912	E9Q6Q4;E9Q912		Rap1gds1	4784600	0.213006
P63101;D3YXN6;D3YXF4;D3YW45	P63101	14-3-3 protein zeta/delta	Ywhaz	301000000	0.250954
Q99LT0	Q99LT0	Protein dpy-30 homolog	Dpy30	6155900	0.306185
Q8R326;Q8R326-2	Q8R326;Q8R326-2	Paraspeckle component 1	Pspc1	12300000	0.497092
P51432	P51432	1-phosphatidylinositol 4,5-bisphosphate phosphodiesterase beta-3	Plcb3	5275500	0.187136
Q9EQI5	Q9EQI5		Ppbp	126000000	8.50123
E9Q9L6;Q6ZQA0-2;Q6ZQA0;B7ZWL5;F6VTL9;F6ZZB1	E9Q9L6;Q6ZQA0-2;Q6ZQA0;B7ZWL5;F6VTL9;F6ZZB1	Neurobeachin-like protein 2	Nbeal2	0	NaN
P31725;Q3UP42	P31725;Q3UP42	Protein S100-A9	S100a9	5495800	0.237812
E9Q7Q3	E9Q7Q3		Tpm3	13300000	NaN
Q80YQ1;P35441	Q80YQ1;P35441	Thrombospondin-1	Thbs1	21100000	1.18492
Q6WVG3	Q6WVG3	BTB/POZ domain-containing protein KCTD12	Kctd12	4094200	0.293919
Q6P069;Q6P069-2	Q6P069;Q6P069-2	Sorcin	Sri	35800000	0.615991
Q61686;D3Z0U2	Q61686	Chromobox protein homolog 5	Cbx5	3811800	0.263068
Q8C050;Q8C050-2	Q8C050;Q8C050-2	Ribosomal protein S6 kinase alpha-5	Rps6ka5	0	NaN
E9PVP1;F6Y889	E9PVP1;F6Y889		Aim1	0	NaN
Q8BK67;A2AWQ2	Q8BK67	Protein RCC2	Rcc2	1521000	0.138242
Q9CQX8;G3UWB2	Q9CQX8;G3UWB2	28S ribosomal protein S36, mitochondrial	Mrps36;Mrps36-ps1	319000000	3.04238
D3YUC9	D3YUC9		Msrb3	8383100	3.07465
O88712;O88712-2;O88712-3	O88712;O88712-2	C-terminal-binding protein 1	Ctbp1	13500000	0.586923
Q7TSV4	Q7TSV4	Phosphoglucomutase-2	Pgm2	10900000	0.174755
Q9DCC5;P23198;D3Z313;D3YV86;D3Z1A9	Q9DCC5;P23198	Chromobox protein homolog 3	Cbx3	33000000	0.13667
Q5F258;Q68FF6	Q5F258;Q68FF6	ARF GTPase-activating protein GIT1	Git1	1351800	0.223744
Q3UNK1;Q9QYB5-2;Q9QYB5	Q3UNK1;Q9QYB5-2;Q9QYB5	Gamma-adducin	Add3	29900000	0.418428
P47857	P47857	6-phosphofructokinase, muscle type	Pfkm	62400000	1.85991
Q69ZX8	Q69ZX8	Actin-binding LIM protein 3	Ablim3	12800000	3.53419
Q80Y98;E9QPZ7;Q80Y98-2;Q80Y98-3	Q80Y98;E9QPZ7;Q80Y98-2;Q80Y98-3	Phospholipase DDHD2	Ddhd2	129070	0.107144
Q3UKF5;Q6P1B1;Q3TL27	Q3UKF5;Q6P1B1;Q3TL27	Xaa-Pro aminopeptidase 1	Xpnpep1	9727400	0.180574
Q8R5J9	Q8R5J9	PRA1 family protein 3	Arl6ip5	3918300	NaN
A2A6C8;P83917;Q9CYJ8;Q7TPM0	A2A6C8;P83917;Q9CYJ8;Q7TPM0	Chromobox protein homolog 1	Cbx1	5230200	NaN
A2AT05;P26883;Q1JUQ6;Q1JUQ8	A2AT05;P26883	Peptidyl-prolyl cis-trans isomerase;Peptidyl-prolyl cis-trans isomerase FKBP1A	Fkbp1a	444000000	0.963577
A2AWI7;Q8R3V5;Q8R3V5-1;Q8R3V5-3;A2AWI9;F2Z4A8	A2AWI7;Q8R3V5;Q8R3V5-1;Q8R3V5-3;A2AWI9	Endophilin-B2	Sh3glb2	9762800	0.602192
F6Q8A4;F6RQA2;Q505N6;A3KGL7;P18653;E9PWV3;G3UZI3;Q8C0P0;Q8C0P0-2	F6Q8A4;F6RQA2;Q505N6;A3KGL7;P18653;E9PWV3;G3UZI3	Ribosomal protein S6 kinase;Ribosomal protein S6 kinase alpha-1	Rps6ka1	10800000	0.166669
P22682	P22682	E3 ubiquitin-protein ligase CBL	Cbl	174360	NaN
Q8R429;F6RQN3	Q8R429	Sarcoplasmic/endoplasmic reticulum calcium ATPase 1	Atp2a1	298900	0.105518
Q80Z19;E9QAR7;F6QGV1	Q80Z19;E9QAR7	Mucin-2	Muc2	2817600	0.118311
Q99M71	Q99M71	Mammalian ependymin-related protein 1	Epdr1	411390	0.385119
F8WIS9;Q80TN1;P11798;P11798-2;F8WHB5;D3Z7K9;F6WHR9	F8WIS9;Q80TN1;P11798	Calcium/calmodulin-dependent protein kinase type II subunit alpha	Camk2a	1763300	NaN
Q3UMU9-3;Q3UMU9;Q3UMU9-2	Q3UMU9-3;Q3UMU9;Q3UMU9-2	Hepatoma-derived growth factor-related protein 2	Hdgfrp2	3747200	0.445772
Q3U4T8;Q61881;D3Z6N3	Q3U4T8;Q61881	DNA replication licensing factor MCM7	Mcm7	1403700	0.405121
Q9Z0Y1;E9Q919	Q9Z0Y1;E9Q919	Dynactin subunit 3	Dctn3	22500000	0.897666
Q99KI0	Q99KI0	Aconitate hydratase, mitochondrial	Aco2	5540000000	0.961816
P25085;Q542C7;Q3TBV5;A2AIU1;P25085-2;Q542W1	P25085;Q542C7;Q3TBV5;A2AIU1;P25085-2;Q542W1	Interleukin-1 receptor antagonist protein	Il1rn	166380	NaN
B1ASG5;P99028	B1ASG5;P99028	Cytochrome b-c1 complex subunit 6, mitochondrial	Uqcrh	45000000	4.37828
Q8K3A0;F6UL52;F6WN43	Q8K3A0	Iron-sulfur cluster co-chaperone protein HscB, mitochondrial	Hscb	22300000	4.76122
Q60847;Q60847-5;Q60847-2;E9PX70;Q60847-3;Q60847-4;F6WIM8	Q60847;Q60847-5;Q60847-2;E9PX70;Q60847-3;Q60847-4	Collagen alpha-1(XII) chain	Col12a1	13200000	2.56292
Q8C1B7;Q8C1B7-2;Q8C1B7-3;F8VPR4;F6QE87;F6RM49	Q8C1B7;Q8C1B7-2;Q8C1B7-3;F8VPR4;F6QE87;F6RM49	Septin-11	2020-09-11	156000000	0.504846
P26041	P26041	Moesin	Msn	657000000	0.778877
Q8VCV2;Q544I1;Q9QYF9;Q8CBD0	Q8VCV2;Q544I1;Q9QYF9;Q8CBD0	Protein NDRG3	Ndrg3	0	NaN
Q02819;H3BK79;D3Z7D7;D3Z1N1	Q02819;H3BK79	Nucleobindin-1	Nucb1	57300000	0.990393
Q924L1;Q924L1-2;Q924L1-3	Q924L1;Q924L1-2;Q924L1-3	LETM1 domain-containing protein 1	Letmd1	1231000	0.214027
Q62523;Q7TQE2;E9Q625	Q62523;Q7TQE2;E9Q625	Zyxin	Zyx	2486900	0.454773
Q63844;D3Z3G6;D3Z6D8;Q61532	Q63844;D3Z3G6;D3Z6D8	Mitogen-activated protein kinase 3	Mapk3	715620	0.122075
E9QJT5;P56376;Q8BMV3	E9QJT5;P56376	Acylphosphatase;Acylphosphatase-1	Acyp1	93400000	2.18293
P46460;G3UX86	P46460	Vesicle-fusing ATPase	Nsf	23000000	0.194122
O08992;Q3TMX0;H3BLG5;A2AKJ6;A2AKJ9;A2AKJ5	O08992;Q3TMX0;H3BLG5	Syntenin-1	Sdcbp	4771200	0.815328
Q91V14-2;Q91V14;Q3TMR9;E9Q7M1;A2A5L1	Q91V14-2;Q91V14	Solute carrier family 12 member 5	Slc12a5	1080800	NaN
P15327;D3Z223;D3YUE8;D3YYH3	P15327;D3Z223;D3YUE8;D3YYH3	Bisphosphoglycerate mutase;Phosphoglycerate mutase	Bpgm	108000000	4.7576
Q99PT1	Q99PT1	Rho GDP-dissociation inhibitor 1	Arhgdia	462000000	0.422083
Q8C845;Q9D8Y0	Q8C845;Q9D8Y0	EF-hand domain-containing protein D2	Efhd2	41900000	0.537317
E9Q1T1;E9Q2E8;E9Q1V9;Q6PHZ2-5;Q6PHZ2;E9QM47;Q6PHZ2-4;E9Q1W0;E9PXV3;Q6PHZ2-2;Q8CCM0;F6ZIE1;D6RDQ8;E9QAJ4;E9PYZ8	E9Q1T1;E9Q2E8;E9Q1V9;Q6PHZ2-5;Q6PHZ2;E9QM47;Q6PHZ2-4;E9Q1W0;E9PXV3;Q6PHZ2-2;Q8CCM0	Calcium/calmodulin-dependent protein kinase type II subunit delta	Camk2d	770580	0.74184
P70445;Q3UFP6	P70445;Q3UFP6	Eukaryotic translation initiation factor 4E-binding protein 2	Eif4ebp2	1053600	NaN
P27005;Q53X15	P27005;Q53X15	Protein S100-A8	S100a8	4207000	0.230107
F6YSI1;G3X911;Q9ESY9	F6YSI1;G3X911;Q9ESY9	Gamma-interferon-inducible lysosomal thiol reductase	Ifi30	1914500	0.264452
Q8BFZ9	Q8BFZ9	Erlin-2	Erlin2	27800000	0.305213
P56959;Q564D0;Q8CFQ9;G3UXT7;Q91VQ2;G3UZD2	P56959;Q564D0;Q8CFQ9;G3UXT7	RNA-binding protein FUS	Fus	142000000	0.845881
Q8CFV9	Q8CFV9	Riboflavin kinase	Rfk	30300000	0.324897
A7VJA4;Q9ERL7;D3YY16;D3Z2F6;E9PUY5	A7VJA4;Q9ERL7;D3YY16;D3Z2F6	Glia maturation factor gamma	Gmfg	2439600	0.159673
B1AWD9;B1AWD8;E9QM56;O08585;B1AWE1	B1AWD9;B1AWD8;E9QM56;O08585;B1AWE1	Clathrin light chain A	Clta	46500000	0.446309
P13595;F7C5V8;E9QB01;P13595-2;F6RLF6;E9Q589;P13595-3;F7C5W6;P13595-4;F7CRA9;F8VQH8	P13595;F7C5V8;E9QB01;P13595-2;F6RLF6;E9Q589;P13595-3;F7C5W6;P13595-4;F7CRA9	Neural cell adhesion molecule 1	Ncam1	2628200	0.197613
E9PYB0	E9PYB0		Ahnak2	27900000	0.68055
Q5EBP8;P49312;P49312-2	Q5EBP8;P49312;P49312-2	Heterogeneous nuclear ribonucleoprotein A1	Hnrnpa1	93700000	0.325786
Q543S0;Q9JK53	Q543S0;Q9JK53	Prolargin	Prelp	215000000	0.753296
Q9EQU5-2;Q3T9S3;Q9EQU5;A2BE93;A2BE92;Q9EQU5-3	Q9EQU5-2;Q3T9S3;Q9EQU5;A2BE93;A2BE92	Protein SET	Set	77200000	0.545524
P28867-2;P28867;Q53YN4;Q1MX42;Q1MX43;Q1MX40;Q1MX41	P28867-2;P28867;Q53YN4;Q1MX42;Q1MX43;Q1MX40;Q1MX41	Protein kinase C delta type	Prkcd	619420	NaN
A2ARI2;O88952	A2ARI2;O88952	Protein lin-7 homolog C	Lin7c	74400000	0.694879
Q9DB60;B1AS14	Q9DB60	Prostamide/prostaglandin F synthase	Fam213b	24700000	1.22321
F6ZJB0;G3UW45;Q9JKF1;F8VQ29;Q3UQP1	F6ZJB0;G3UW45;Q9JKF1	Ras GTPase-activating-like protein IQGAP1	Iqgap1	15700000	0.199916
O08582	O08582	GTP-binding protein 1	Gtpbp1	0	NaN
P13745;Q6P8Q0;F6SC55	P13745;Q6P8Q0	Glutathione S-transferase A1;Glutathione S-transferase	Gsta1;Gm3776	25900000	0.0718184
Q3TE41;Q920Q6;Q2M2Q8;Q920Q6-2;Q920Q6-3;B1AT10;E9PY59;B1AT13;Q3UWR6	Q3TE41;Q920Q6;Q2M2Q8;Q920Q6-2;Q920Q6-3;B1AT10	RNA-binding protein Musashi homolog 2	Msi2	36600000	0.890869
D3Z6Q9	D3Z6Q9	Bridging integrator 2	Bin2	40100000	1.00762
Q9R1K9;B1AUQ7	Q9R1K9;B1AUQ7	Centrin-2	Cetn2	9051000	0.44617
Q62470-2;Q62470;Q62470-3;F6UD16	Q62470-2;Q62470;Q62470-3	Integrin alpha-3;Integrin alpha-3 heavy chain;Integrin alpha-3 light chain	Itga3	128920	0.114527
Q9JIF0;Q80WV6;Q3UIG8;Q9JIF0-2;Q9JIF0-3;D3Z0A2;F8WH01;Q3TPF5;D3Z3N0;Q9CX58	Q9JIF0;Q80WV6;Q3UIG8;Q9JIF0-2;Q9JIF0-3;D3Z0A2;F8WH01;Q3TPF5;D3Z3N0;Q9CX58	Protein arginine N-methyltransferase 1	Prmt1	12200000	0.267924
P12787	P12787	Cytochrome c oxidase subunit 5A, mitochondrial	Cox5a	2100000000	3.54246
P62746;Q4FJM5	P62746;Q4FJM5	Rho-related GTP-binding protein RhoB	Rhob	157000000	8.22707
Q91WN1	Q91WN1	DnaJ homolog subfamily C member 9	Dnajc9	1966100	0.367661
Q546K1;Q9CX80	Q546K1;Q9CX80	Cytoglobin	Cygb	33800000	0.975419
Q02357-6;E9QLM8;Q02357-4;Q0VGY9;D3Z5M4;D3YTV8;E9QPP1;G8JL84;Q02357-3;E9QNT8;Q02357;B7ZW98;G5E8J2;Q02357-2;Q02357-5;G3UY11;E9QPV4;F7D1P5;D6RJ51	Q02357-6;E9QLM8;Q02357-4;Q0VGY9;D3Z5M4;D3YTV8;E9QPP1;G8JL84;Q02357-3;E9QNT8;Q02357;B7ZW98;G5E8J2;Q02357-2;Q02357-5;G3UY11;E9QPV4;F7D1P5	Ankyrin-1	Ank1	9851300	0.95338
A2AUY9;Q8VC88	A2AUY9;Q8VC88	Grancalcin	Gca	675690	NaN
Q3U5I5;Q60631;B1AT92;B1AT94;Q60631-2;B1AT95	Q3U5I5;Q60631;B1AT92;B1AT94;Q60631-2;B1AT95	Growth factor receptor-bound protein 2	Grb2	52300000	0.433482
E9PUC5;Q8C0E9	E9PUC5;Q8C0E9		Psd3	1131800	0.326445
Q8BR90;Q8BR90-2	Q8BR90;Q8BR90-2	UPF0600 protein C5orf51 homolog		0	NaN
E9PUI5;F6Q0N9;Q8K012;E9PUK3;Q8K012-2	E9PUI5;F6Q0N9;Q8K012;E9PUK3;Q8K012-2	Formin-binding protein 1-like	Fnbp1l	4929200	0.243055
P52503;D3YW32	P52503;D3YW32	NADH dehydrogenase [ubiquinone] iron-sulfur protein 6, mitochondrial	Ndufs6	963000000	9.65624
Q3TWZ9;Q6IRU5-2	Q3TWZ9;Q6IRU5-2		Cltb	0	NaN
Q2UZW7;Q6PER3	Q2UZW7;Q6PER3	Microtubule-associated protein RP/EB family member 3	Mapre3	97000000	0.576502
P25206;Q3UI57	P25206;Q3UI57	DNA replication licensing factor MCM3	Mcm3	555940	0.270307
Q8BU85	Q8BU85	Methionine-R-sulfoxide reductase B3, mitochondrial	Msrb3	36700000	NaN
Q499X4;Q62465	Q499X4;Q62465	Synaptic vesicle membrane protein VAT-1 homolog	Vat1	14100000	0.159
P32921;P32921-2;Q3U6U7;E0CXQ4;E0CXX4	P32921;P32921-2;Q3U6U7	Tryptophan--tRNA ligase, cytoplasmic;T1-TrpRS;T2-TrpRS	Wars	18500000	0.267494
Q9Z2H7	Q9Z2H7	PDZ domain-containing protein GIPC2	Gipc2	3143700	0.236591
A5A4Y9;Q8K1L5;G3UZ30	A5A4Y9;Q8K1L5;G3UZ30	Protein phosphatase 1 regulatory subunit 11	Ppp1r11	25000000	NaN
Q8BHZ0;F7BT94	Q8BHZ0;F7BT94	Protein FAM49A	Fam49a	421050	NaN
E9PYV9;Q91Z50;P39749	E9PYV9;Q91Z50;P39749	Flap endonuclease 1	Fen1	27700000	0.206945
Q91YD3	Q91YD3	mRNA-decapping enzyme 1A	Dcp1a	1179800	0.485909
P97450;E9QAD6	P97450	ATP synthase-coupling factor 6, mitochondrial	Atp5j	1520000000	5.68828
B1AUP4;Q9D0B6;Q9D0B6-2	B1AUP4;Q9D0B6;Q9D0B6-2	UPF0368 protein Cxorf26 homolog	2610029G23Rik	1863900	0.656125
Q3UW53;E9PYV4;D3Z233;D3YYZ9	Q3UW53;E9PYV4;D3Z233	Protein Niban	Fam129a	2976300	0.271503
Q8BVE3	Q8BVE3	V-type proton ATPase subunit H	Atp6v1h	14400000	0.150435
E9PW66;P28656;Q8BSH9	E9PW66;P28656;Q8BSH9	Nucleosome assembly protein 1-like 1	Nap1l1	35800000	0.578603
E9Q8T1;E9Q9Z4;E9QL08;H7BX75;G8JL38;Q9JJG0-3;Q9JJG0;Q9JJG0-2;Q9JJG0-4	E9Q8T1;E9Q9Z4;E9QL08;H7BX75;G8JL38;Q9JJG0-3;Q9JJG0;Q9JJG0-2;Q9JJG0-4	Transforming acidic coiled-coil-containing protein 2	Tacc2	9305500	1.03077
E9Q5J9;Q8K0Z5	E9Q5J9;Q8K0Z5		Tpm3	28300000	0.493778
Q9DBR7	Q9DBR7	Protein phosphatase 1 regulatory subunit 12A	Ppp1r12a	53100000	0.637471
Q3UHJ0;Q3UHJ0-2	Q3UHJ0;Q3UHJ0-2	AP2-associated protein kinase 1	Aak1	918700	0.50355
Q62261;D3YWH8	Q62261	Spectrin beta chain, brain 1	Sptbn1	351000000	0.311614
P11031	P11031	Activated RNA polymerase II transcriptional coactivator p15	Sub1	26900000	0.312441
Q8BYW1;Q8BYW1-3;Q8BYW1-2	Q8BYW1;Q8BYW1-3;Q8BYW1-2	Rho GTPase-activating protein 25	Arhgap25	524660	0.224064
Q9D853	Q9D853	Methyltransferase-like protein 10	Mettl10	782870	NaN
P31324	P31324	cAMP-dependent protein kinase type II-beta regulatory subunit	Prkar2b	5364700	0.24793
F8WH23;Q61581;F8WII5;E9Q5D9	F8WH23;Q61581;F8WII5;E9Q5D9	Insulin-like growth factor-binding protein 7	Igfbp7	14600000	0.706914
Q8C0M9	Q8C0M9	L-asparaginase	Asrgl1	51600000	1.15227
E9Q6R0;B7ZNL2;A2RSB1;Q78ZA7	E9Q6R0;B7ZNL2;A2RSB1;Q78ZA7	Nucleosome assembly protein 1-like 4	Nap1l4	278000000	0.958313
P01631	P01631	Ig kappa chain V-II region 26-10		15600000	2.47133
A2AVR6;Q543P6;Q8VHQ9;Q8CAL6;Q3TBG4	A2AVR6;Q543P6;Q8VHQ9;Q8CAL6;Q3TBG4	Acyl-coenzyme A thioesterase 11	Acot11	531260	NaN
E9Q2M9;E9PV60;F6X8K3	E9Q2M9;E9PV60		Wdfy4	0	NaN
P08032	P08032	Spectrin alpha chain, erythrocyte	Spta1	59400000	1.65544
D3YTQ3;F6VQH5;Q9Z130	D3YTQ3;F6VQH5;Q9Z130	Heterogeneous nuclear ribonucleoprotein D-like	Hnrpdl	12900000	0.403959
E9QKC6;Q3UHH4;Q9ESN6;D3YZJ0;D3YY69;D3YTN5	E9QKC6;Q3UHH4;Q9ESN6	Tripartite motif-containing protein 2	Trim2	418150	0.168367
Q8VE70;E0CY82;F8WI55	Q8VE70	Programmed cell death protein 10	Pdcd10	22400000	1.14495
A2ALF2;Q6NZB0;A2ALF3;A2ALF0;F6TQL3;F7CXJ2;D3Z4I5	A2ALF2;Q6NZB0;A2ALF3;A2ALF0;F6TQL3	DnaJ homolog subfamily C member 8	Dnajc8	134000000	1.3737
Q8C163;E9PZS5	Q8C163;E9PZS5	Nuclease EXOG, mitochondrial	Exog	1490300	0.711946
F6SJE0;P53810;Q5ND42;F8WGG5	F6SJE0;P53810;Q5ND42	Phosphatidylinositol transfer protein alpha isoform	Pitpna	79800000	0.420133
A2ATS2;P62073	A2ATS2;P62073	Mitochondrial import inner membrane translocase subunit Tim10	Timm10	203000000	1.88023
Q7TMM9	Q7TMM9	Tubulin beta-2A chain	Tubb2a	10800000	0.337029
B1AYC9;Q8R5A3	B1AYC9;Q8R5A3	Amyloid beta A4 precursor protein-binding family B member 1-interacting protein	Apbb1ip	0	NaN
F8VQ43;E9QNV4;E9Q965;F7D9C4	F8VQ43;E9QNV4;E9Q965;F7D9C4		Lama2	46000000	1.12568
A2A5N2;Q9CQV8;Q9CQV8-2;A2A5N1	A2A5N2;Q9CQV8;Q9CQV8-2;A2A5N1	14-3-3 protein beta/alpha;14-3-3 protein beta/alpha, N-terminally processed	Ywhab	235000000	0.369495
Q8VD00	Q8VD00	Transmembrane protein 97	Tmem97	0	NaN
Q9JHQ5;F6VG18;F6VTH5;E9Q9P1	Q9JHQ5;F6VG18;F6VTH5	Leucine zipper transcription factor-like protein 1	Lztfl1	20800000	0.91954
P13707;E0CXN5	P13707;E0CXN5	Glycerol-3-phosphate dehydrogenase [NAD(+)], cytoplasmic	Gpd1	201000000	0.120107
E9QNQ2;B2RXR6	E9QNQ2;B2RXR6	Serine/threonine-protein phosphatase 6 regulatory ankyrin repeat subunit B	Ankrd44	481240	0.150852
E9PWZ5;Q5RKN9;P47753	E9PWZ5;Q5RKN9;P47753	F-actin-capping protein subunit alpha-1	Capza1	40400000	0.619694
A2ANB5;Q9CZ15	A2ANB5;Q9CZ15	DNA replication complex GINS protein PSF1	Gins1	0	NaN
Q3TU85;Q61696	Q3TU85;Q61696	Heat shock 70 kDa protein 1A	Hspa1a	64000000	0.41176
Q4VA93;P20444;Q3TQ39	Q4VA93;P20444	Protein kinase C;Protein kinase C alpha type	Prkca	1361100	0.269956
O55028;Q3UCB5;D3Z7R0	O55028;Q3UCB5;D3Z7R0	[3-methyl-2-oxobutanoate dehydrogenase [lipoamide]] kinase, mitochondrial	Bckdk	13600000	1.0554
O88343;A7E1Z5;E9Q8N8;E1AWU4;O88343-2;D3Z7G8;D3Z7I7;O88343-3	O88343;A7E1Z5;E9Q8N8;E1AWU4;O88343-2	Electrogenic sodium bicarbonate cotransporter 1	Slc4a4	23400000	0.217969
Q9QYR9	Q9QYR9	Acyl-coenzyme A thioesterase 2, mitochondrial	Acot2	284000000	3.70137
B7ZMR0;Q76LS9;Q76LS9-2;Q76LS9-3	B7ZMR0;Q76LS9;Q76LS9-2;Q76LS9-3	Protein FAM63A	Fam63a	255900	NaN
P02463	P02463	Collagen alpha-1(IV) chain;Arresten	Col4a1	989120	0.528933
E9Q1W3;A2AQA9;E9PYN5	E9Q1W3;A2AQA9		Neb	46900000	0.316516
F6VW30;F6YY69;A3KML3;P68254;P68254-2	F6VW30;F6YY69;A3KML3;P68254;P68254-2	14-3-3 protein theta	Ywhaq	71300000	0.251231
P31361	P31361	POU domain, class 3, transcription factor 3	Pou3f3	2413600	0.52304
P26040;Q4KML7	P26040;Q4KML7	Ezrin	Ezr	452000000	0.360737
Q60597-3;Q60597-4	Q60597-3;Q60597-4			672000000	0.82203
E9Q7K1	E9Q7K1		Guk1	43800000	1.07212
Q8C1A5	Q8C1A5	Thimet oligopeptidase	Thop1	8500300	0.257407
Q544G5;Q62165	Q544G5;Q62165	Dystroglycan;Alpha-dystroglycan;Beta-dystroglycan	Dag1	257000000	3.03481
A8IP69;P61982	A8IP69;P61982	14-3-3 protein gamma;14-3-3 protein gamma, N-terminally processed	Ywhag	790000000	0.790202
D3Z024;Q6EDY6;Q6EDY6-3;D3Z030;E9PU95;F7AI27;Q6EDY6-2;E9Q3Z9	D3Z024;Q6EDY6;Q6EDY6-3;D3Z030;E9PU95;F7AI27	Leucine-rich repeat-containing protein 16A	Lrrc16a	0	NaN
Q8R3P0;B0QZP3;D6RJ20	Q8R3P0	Aspartoacylase	Aspa	786480	0.127702
F8WGL3;P18760;E9Q1T2	F8WGL3;P18760;E9Q1T2	Cofilin-1	Cfl1;Gm6180	285000000	0.286558
Q3U335;Q99KH8	Q3U335;Q99KH8	Serine/threonine-protein kinase 24;Serine/threonine-protein kinase 24 35 kDa subunit;Serine/threonine-protein kinase 24 12 kDa subunit	Stk24	10800000	0.26111
P07724;Q546G4	P07724;Q546G4	Serum albumin	Alb	6040000000	0.976086
O35295	O35295	Transcriptional activator protein Pur-beta	Purb	20500000	0.699692
Q9CQF7;Q9CWM4	Q9CQF7;Q9CWM4	Prefoldin subunit 1	Pfdn1	91300000	1.41816
Q9JI46;I1E4X7;H3BLR8;B2KF67	Q9JI46;I1E4X7;H3BLR8;B2KF67	Diphosphoinositol polyphosphate phosphohydrolase 1	Nudt3	2094200	0.633072
Q3TWG5;Q8R1Q8	Q3TWG5;Q8R1Q8	Cytoplasmic dynein 1 light intermediate chain 1	Dync1li1	79700000	0.705965
Q99K01-4;Q99K01-2;Q99K01;E9Q8P7;Q99K01-5;D3YZA7;E9PZ98	Q99K01-4;Q99K01-2;Q99K01;E9Q8P7;Q99K01-5;D3YZA7	Pyridoxal-dependent decarboxylase domain-containing protein 1	Pdxdc1	16400000	0.1695
P17918;Q542J9;E9Q7Z3	P17918;Q542J9;E9Q7Z3	Proliferating cell nuclear antigen	Pcna	2295200	0.208181
Q9JK48-2;Q9JK48;Q3TYR7	Q9JK48-2;Q9JK48;Q3TYR7	Endophilin-B1	Sh3glb1	18600000	1.08066
Q9DBL9;Q9DBL9-2;D3Z7K3	Q9DBL9;Q9DBL9-2	1-acylglycerol-3-phosphate O-acyltransferase ABHD5	Abhd5	94364	NaN
Q8CHU3;Q5NCM7;Q8CHU3-2;Q5NCM5;Q5NCM6;F7CUV7;A8Y5D4	Q8CHU3;Q5NCM7;Q8CHU3-2;Q5NCM5;Q5NCM6	Epsin-2	Epn2	3564800	0.398073
Q9DBG5	Q9DBG5	Perilipin-3	Plin3	329000000	3.29175
Q91XU3	Q91XU3	Phosphatidylinositol 5-phosphate 4-kinase type-2 gamma	Pip4k2c	1290900	0.216015
P63085;E9QAJ2	P63085;E9QAJ2	Mitogen-activated protein kinase 1	Mapk1	3512100	0.150333
Q80SW1;D3Z2Q0;F7ATQ6	Q80SW1	Putative adenosylhomocysteinase 2	Ahcyl1	18500000	0.144917
A1BN54	A1BN54		Actn1	64400000	0.213461
E9Q397	E9Q397		Spnb1	42200000	0.764818
Q9QUR7	Q9QUR7	Peptidyl-prolyl cis-trans isomerase NIMA-interacting 1	Pin1	12400000	1.21325
B1AT70;Q91W69;E9Q1Q2;D3Z550	B1AT70;Q91W69;E9Q1Q2	Epsin-3	Epn3	947760	0.407249
E9PZ00;Q8BFQ1;Q3UFE8;Q61207	E9PZ00;Q8BFQ1;Q3UFE8;Q61207	Sulfated glycoprotein 1	Psap	261000000	0.85492
Q9D708;D3Z2Y6	Q9D708;D3Z2Y6		S100a16	1376700	0.353344
B7ZCT9;Q8CBW3;B7ZCU0;Q3TJ64;Q8CBW3-3;Q3TJR5;Q8CBW3-4;B7ZCU3;B7ZCU4;Q3TPY5;Q8CBW3-2;B7ZCU5;B7ZCU2;B7ZCU1;Q8CBW3-5	B7ZCT9;Q8CBW3;B7ZCU0;Q3TJ64;Q8CBW3-3;Q3TJR5;Q8CBW3-4;B7ZCU3;B7ZCU4;Q3TPY5;Q8CBW3-2;B7ZCU5;B7ZCU2;B7ZCU1;Q8CBW3-5	Abl interactor 1	Abi1	8623100	0.287944
A2RS23;Q11136;G3UXC5	A2RS23;Q11136;G3UXC5	Xaa-Pro dipeptidase	Pepd	4773500	0.199342
Q8CGB3-3;Q8CGB3;Q8CIA8;Q8CGB3-2	Q8CGB3-3;Q8CGB3;Q8CIA8;Q8CGB3-2	Uveal autoantigen with coiled-coil domains and ankyrin repeats	Uaca	670880	0.1982
Q923D4	Q923D4	Splicing factor 3B subunit 5	Sf3b5	10500000	0.740412
Q3TX25;Q80VQ0	Q3TX25;Q80VQ0	Aldehyde dehydrogenase;Aldehyde dehydrogenase family 3 member B1	Aldh3b1	29727	NaN
Q3UHP6;B2KF16;P59672-2;B2KF14;P59672	Q3UHP6;B2KF16;P59672-2;B2KF14;P59672	Ankyrin repeat and SAM domain-containing protein 1A	Anks1;Anks1a	648650	NaN
Q9ESJ0;G3UX04;G3UXM9	Q9ESJ0	Exportin-4	Xpo4	7038800	NaN
Q9JHL1;Q6NS54;Q9JHL1-2	Q9JHL1;Q6NS54;Q9JHL1-2	Na(+)/H(+) exchange regulatory cofactor NHE-RF2	Slc9a3r2	24800000	1.87755
G3X9B8;O70318;Q811B2;G3X991	G3X9B8;O70318;Q811B2;G3X991	Band 4.1-like protein 2	Epb4.1l2;Epb41l2	30500000	0.41278
P29533;Q3UPN1;P29533-2;Q544V4	P29533;Q3UPN1	Vascular cell adhesion protein 1	Vcam1	723830	0.24351
B7ZNU9;Q542S9;Q61235	B7ZNU9;Q542S9;Q61235	Beta-2-syntrophin	Sntb2	3353100	0.565131
Q62418;Q62418-2;Q62418-3	Q62418;Q62418-2;Q62418-3	Drebrin-like protein	Dbnl	15300000	0.374308
A2AB79;Q8BFU2;B2RVF0;P22752;Q8CGP5;Q8CGP7;Q8R1M2;A3KPD0;Q8CGP6;Q8CGP4	A2AB79;Q8BFU2;B2RVF0;P22752;Q8CGP5;Q8CGP7;Q8R1M2;A3KPD0;Q8CGP6	Histone H2A;Histone H2A type 3;Histone H2A type 1;Histone H2A type 1-F;Histone H2A type 1-K;Histone H2A.J;Histone H2A type 1-H	Hist3h2a;Hist1h2ad;Hist1h2ab;Hist1h2af;Hist1h2ak;H2afj;Hist1h2ah	0	NaN
Q3UH59;Q61879;Q5SV64;Q8BXF2	Q3UH59;Q61879;Q5SV64	Myosin-10	Myh10	29500000	0.249445
P61164	P61164	Alpha-centractin	Actr1a	66400000	0.511902
Q8VDQ8-2;E9PXF5	Q8VDQ8-2;E9PXF5		Sirt2	12800000	0.275771
Q03958;Q792E4;G3UYF9	Q03958;Q792E4;G3UYF9	Prefoldin subunit 6	Pfdn6;H2-Ke2	71700000	1.95492
Q811S7;Q811S7-2	Q811S7;Q811S7-2	Upstream-binding protein 1	Ubp1	668040	NaN
E9QA15;D3Z6I7	E9QA15;D3Z6I7		Cald1	459000000	0.553312
O88456;D3YW48;Q9D7J7	O88456;D3YW48	Calpain small subunit 1	Capns1	65000000	0.751146
Q64727	Q64727	Vinculin	Vcl	771000000	0.917347
O70591;F8WJ30	O70591	Prefoldin subunit 2	Pfdn2	87500000	1.38497
P62141	P62141	Serine/threonine-protein phosphatase PP1-beta catalytic subunit	Ppp1cb	6069000	0.453042
P61028;Q0PD49;E9Q445	P61028;Q0PD49;E9Q445	Ras-related protein Rab-8B	Rab8b	0	NaN
Q921C5-2;Q921C5;D3Z390;Q921C5-3	Q921C5-2;Q921C5;D3Z390	Protein bicaudal D homolog 2	Bicd2	7194800	NaN
P62748	P62748	Hippocalcin-like protein 1	Hpcal1	5865600	0.271253
Q3TUE1;Q91WJ8;Q91WJ8-2	Q3TUE1;Q91WJ8;Q91WJ8-2	Far upstream element-binding protein 1	Fubp1	168000000	0.514933
B3RH24;P48678-2;B3RH23;P48678;P48678-3;D3YUF7	B3RH24;P48678-2;B3RH23;P48678;P48678-3	Prelamin-A/C;Lamin-A/C	Lmna	1990000000	1.28393
Q9CZU6	Q9CZU6	Citrate synthase, mitochondrial	Cs	727000000	1.11044
Q8VCE6	Q8VCE6	5(3)-deoxyribonucleotidase, mitochondrial	Nt5m	503680	NaN
A2A4L8;O54941;C0IMW9	A2A4L8;O54941	SWI/SNF-related matrix-associated actin-dependent regulator of chromatin subfamily E member 1	Smarce1	5775900	0.487092
P60521	P60521	Gamma-aminobutyric acid receptor-associated protein-like 2	Gabarapl2	16800000	0.330568
Q9CX86	Q9CX86	Heterogeneous nuclear ribonucleoprotein A0	Hnrnpa0	148000000	0.384098
O35704;F6XPH5	O35704	Serine palmitoyltransferase 1	Sptlc1	707060	0.292834
Q9Z1G3	Q9Z1G3	V-type proton ATPase subunit C 1	Atp6v1c1	4726300	0.220182
Q91VZ6;D3YVX4	Q91VZ6	Stromal membrane-associated protein 1	Smap1	4744800	0.285494
P0C605-2	P0C605-2			1137400	0.25393
A2A5L8;Q9JI11;A2A5M9;Q8CDG4;F7BYZ4	A2A5L8;Q9JI11	Serine/threonine-protein kinase 4;Serine/threonine-protein kinase 4 37kDa subunit;Serine/threonine-protein kinase 4 18kDa subunit	Stk4	5171800	0.254207
P97496;Q3UNN4;P97496-2;D3Z1X8;Q3UZD0	P97496;Q3UNN4;P97496-2;D3Z1X8;Q3UZD0	SWI/SNF complex subunit SMARCC1	Smarcc1	755590	0.18137
G5E8V9;E9Q3G5;A2RSX9;E9QAY5	G5E8V9;E9Q3G5;A2RSX9;E9QAY5		Arfip1	20200000	0.35877
Q9Z2W1;D3Z359	Q9Z2W1;D3Z359	Serine/threonine-protein kinase 25	Stk25	0	NaN
Q9DBX6;D3Z7F1	Q9DBX6;D3Z7F1	Cytochrome P450 2S1	Cyp2s1	118430	0.132221
Q9DBS2;B1AX95	Q9DBS2;B1AX95	Tumor protein p63-regulated gene 1-like protein	Tprg1l;Tprgl	483980	NaN
Q8CIN4	Q8CIN4	Serine/threonine-protein kinase PAK 2;PAK-2p27;PAK-2p34	Pak2	24500000	0.303619
Q9D967	Q9D967	Magnesium-dependent phosphatase 1	Mdp1	65300000	4.62107
Q9JMC3;D3Z1U5	Q9JMC3	DnaJ homolog subfamily A member 4	Dnaja4	51000000	3.78301
Q3TGF2;H3BLE6	Q3TGF2	Protein FAM107B	Fam107b	36300000	0.366771
Q3U7R1;Q3U7R1-2	Q3U7R1;Q3U7R1-2	Extended synaptotagmin-1	Esyt1	3263300	0.260064
D3YZP9	D3YZP9	Coiled-coil domain-containing protein 6	Ccdc6	162630	NaN
A2A4B1;Q149B0;Q99PI4;A2A4B3	A2A4B1;Q149B0;Q99PI4;A2A4B3	Phosphatidate phosphatase LPIN3	Lpin3	59113	NaN
G3X9Y9;P21271-3;G5E8G6;P21271;F8VQM3;H3BLK6;D3Z135	G3X9Y9;P21271-3;G5E8G6;P21271	Unconventional myosin-Vb	Myo5b	1970800	0.172631
P34022;H7BX22	P34022;H7BX22	Ran-specific GTPase-activating protein	Ranbp1	53200000	0.638162
B0V2P5;Q8BPN8;Q8BPN8-2;F6RYL8;B0V2P6;Q8BPN8-3	B0V2P5;Q8BPN8;Q8BPN8-2;F6RYL8	DmX-like protein 2	Dmxl2	132540	0.230792
B2KF41;P84104;P84104-2;Q3U781;A2A4X6	B2KF41;P84104;P84104-2;Q3U781;A2A4X6	Serine/arginine-rich splicing factor 3	Srsf3;Gm12355	23900000	0.206088
Q9EQG7	Q9EQG7	Ectonucleotide pyrophosphatase/phosphodiesterase family member 5	Enpp5	375210	0.288184
P18654;B1AXN9;E9QAP2;B1AXP0;E9QK39;A2CEE7;E9PUP0;Q7TPS0;A2CEE5;Q7TPS0-3;A2CEE6;E9QLX6;Q7TPS0-2;F6UG16	P18654;B1AXN9;E9QAP2	Ribosomal protein S6 kinase alpha-3	Rps6ka3	1087100	0.183928
Q5HZY7;Q9CR51	Q5HZY7;Q9CR51	V-type proton ATPase subunit G 1	Atp6v1g1	14500000	0.470389
Q542V8;Q9JIQ3	Q542V8;Q9JIQ3	Diablo homolog, mitochondrial	Diablo	7859000	NaN
Q791G4;Q9R0M4;Q8VIQ4	Q791G4;Q9R0M4;Q8VIQ4	Podocalyxin	Podxl	3882900	0.43518
Q91UZ1;A2AT91;A2AT93	Q91UZ1;A2AT91		Plcb4	2145500	0.225311
E9Q4K0;Q8BL65-4;Q8BL65;E9Q0W6;Q8BL65-3;Q8BL65-2;Q8BL65-5;D3Z0Y4;F6VVW4;F7A5C5;D3YYR9;F6UI99;F6W6N3	E9Q4K0;Q8BL65-4;Q8BL65;E9Q0W6;Q8BL65-3;Q8BL65-2;Q8BL65-5	Actin-binding LIM protein 2	Ablim2	1060700	0.718856
Q9CQM5	Q9CQM5	Thioredoxin domain-containing protein 17	Txndc17	37500000	0.429277
Q9EPJ9;Q3TGS9;Q9EPJ9-2	Q9EPJ9;Q3TGS9;Q9EPJ9-2	ADP-ribosylation factor GTPase-activating protein 1	Arfgap1	7925800	0.419094
Q9ES89;Q3TSR0	Q9ES89;Q3TSR0	Exostosin-like 2	Extl2	797300	0.820614
Q01730;Q9D031;A2AUR7;B1AYQ0;E0CXG5;E0CXH9	Q01730;Q9D031;A2AUR7;B1AYQ0	Ras suppressor protein 1	Rsu1	459000000	2.1631
P68372;G3UZR1	P68372	Tubulin beta-4B chain	Tubb4b	460000000	0.269993
O88990	O88990	Alpha-actinin-3	Actn3	7547200	0.297159
Q8C854;Q8C854-3;A2ATP6;A2ATP5;G8JL68;Q8C854-2;F6XJA1;Q8C854-1	Q8C854;Q8C854-3;A2ATP6;A2ATP5;G8JL68;Q8C854-2;F6XJA1;Q8C854-1	Myelin expression factor 2	Myef2	4135800	0.208498
P99024	P99024	Tubulin beta-5 chain	Tubb5	2997100	0.492514
B1AS02;Q8K3C3;B1AS04	B1AS02;Q8K3C3	Protein LZIC	Lzic	47800000	2.70285
Q8K0F1;Q8K0F1-2	Q8K0F1;Q8K0F1-2	TBC1 domain family member 23	Tbc1d23	282640	0.194833
Q9DBE8;F6RBY3	Q9DBE8;F6RBY3	Alpha-1,3/1,6-mannosyltransferase ALG2	Alg2	1515000	0.845738
Q8CAA7;E0CX81	Q8CAA7	Glucose 1,6-bisphosphate synthase	Pgm2l1	774850	0.229295
Q8BJF9	Q8BJF9	Charged multivesicular body protein 2b	Chmp2b	7851700	1.25785
Q6PDL0	Q6PDL0	Cytoplasmic dynein 1 light intermediate chain 2	Dync1li2	12300000	0.490461
O70400	O70400	PDZ and LIM domain protein 1	Pdlim1	214000000	1.31574
E9QPX3;Q9CXZ1	E9QPX3;Q9CXZ1	NADH dehydrogenase [ubiquinone] iron-sulfur protein 4, mitochondrial	Ndufs4	1570000000	8.61326
A2AQ13;P61022;B0R091;B0R092	A2AQ13;P61022;B0R091	Calcium-binding protein p22	1500003O03Rik;Chp	0	NaN
Q9CWZ7;D3Z4B2	Q9CWZ7;D3Z4B2	Gamma-soluble NSF attachment protein	Napg	31500000	0.363399
Q9CQB4;Q9D855	Q9CQB4;Q9D855	Cytochrome b-c1 complex subunit 7	Uqcrb	4420000000	6.8956
P97449;Q3TB69	P97449;Q3TB69	Aminopeptidase N	Anpep	29000000	0.17935
E9Q0S6;Q9DBT6;Q8C6V6	E9Q0S6		Tns1	43100000	0.454195
Q9QZE7	Q9QZE7	Translin-associated protein X	Tsnax	12400000	0.445375
Q9D939	Q9D939	Sulfotransferase 1C2	Sult1c2	9706000	0.101819
Q9WV98	Q9WV98	Mitochondrial import inner membrane translocase subunit Tim9	Timm9	30200000	1.73463
B1AU75;Q99MD9;B1AU76;B1AU77;Q99MD9-2	B1AU75;Q99MD9;B1AU76	Nuclear autoantigenic sperm protein	Nasp	10400000	0.440878
P28653;Q3TNY9	P28653;Q3TNY9	Biglycan	Bgn	19500000	0.541096
P29595;Q3UI46	P29595;Q3UI46	NEDD8	Nedd8	41000000	1.93656
Q78J03	Q78J03	Methionine-R-sulfoxide reductase B2, mitochondrial	Msrb2	102000000	4.25152
Q9D6F9	Q9D6F9	Tubulin beta-4A chain	Tubb4a	209000000	0.2248
E9PUS6	E9PUS6		Agrn	642400	NaN
P61327;Q9CQL1;G3UZW7;G3UYI5	P61327;Q9CQL1;G3UZW7;G3UYI5	Protein mago nashi homolog;Protein mago nashi homolog 1-related	Magoh;Magoh-rs1;Magohb	16200000	0.634759
Q8BMF4	Q8BMF4	Dihydrolipoyllysine-residue acetyltransferase component of pyruvate dehydrogenase complex, mitochondrial	Dlat	790000000	1.70462
A3KGU7	A3KGU7		Spna2	1030000000	0.481047
E9PYD1;D3Z100;D3YXS7;F6ZXW2	E9PYD1;D3Z100;D3YXS7;F6ZXW2		Fam98c	232610	NaN
O88342;Q3TJY2	O88342;Q3TJY2	WD repeat-containing protein 1	Wdr1	250000000	0.551694
Q8BPG6;F8WIM0;F6R8U9	Q8BPG6;F8WIM0;F6R8U9	Sulfatase-modifying factor 2	Sumf2	0	NaN
Q6PIC6;Q8VCE0	Q6PIC6;Q8VCE0	Sodium/potassium-transporting ATPase subunit alpha-3	Atp1a3	62000000	0.289637
Q01147;Q547S9;Q01147-2;Q543W0;Q62347;G5E865;P27699-5;D3Z2U7;F6QKL8;D3Z7M6;P27699-6;E9PWV9;F6W4F5;P27699-7;F6Q346;P27699-8;E9QLF2;P81269;P27699-2;P27699-10;F6U9F5;Q99JF1;D3Z6A5;Q78Z98;D3Z326;D3Z7P7	Q01147;Q547S9;Q01147-2;Q543W0;Q62347;G5E865;P27699-5;D3Z2U7;F6QKL8;D3Z7M6;P27699-6;E9PWV9;F6W4F5;P27699-7;F6Q346;P27699-8;E9QLF2;P81269;P27699-2;P27699-10;F6U9F5;Q99JF1;D3Z6A5;Q78Z98;D3Z326;D3Z7P7	Cyclic AMP-responsive element-binding protein 1;Cyclic AMP-dependent transcription factor ATF-1	Creb1;Crem;Atf1	1423900	NaN
Q4FK36;Q9R0P5	Q4FK36;Q9R0P5	Destrin	Dstn	261000000	0.349101
Q9D6J6;Q9D6J6-2	Q9D6J6;Q9D6J6-2	NADH dehydrogenase [ubiquinone] flavoprotein 2, mitochondrial	Ndufv2	1660000000	5.59597
Q548F2;Q9R111;D3YU09	Q548F2;Q9R111;D3YU09	Guanine deaminase	Gda	48100000	0.525624
P56812;Q564F6;D3Z7Q5	P56812;Q564F6	Programmed cell death protein 5	Pdcd5	94800000	1.77161
G3UW85;P84089;Q4FZH7;Q9D9P6	G3UW85;P84089;Q4FZH7	Enhancer of rudimentary homolog	Erh	21900000	0.50355
Q8CJ40;A2AA80;Q8CJ40-2;Q8CJ40-3	Q8CJ40;A2AA80;Q8CJ40-2;Q8CJ40-3	Rootletin	Crocc	243550	NaN
Q6PE15;Q6PE15-2;F6X5P5	Q6PE15;Q6PE15-2	Abhydrolase domain-containing protein 10, mitochondrial	Abhd10	7635700	1.22772
F6TCF9;Q60739;Q60739-2	F6TCF9;Q60739;Q60739-2	BAG family molecular chaperone regulator 1	Bag1	18100000	0.59004
P63280;G3UYP0;Q8CFZ0;G3UZL6	P63280;G3UYP0;Q8CFZ0	SUMO-conjugating enzyme UBC9	Ube2i	18200000	0.33095
Q61206;F8WIW7	Q61206;F8WIW7	Platelet-activating factor acetylhydrolase IB subunit beta	Pafah1b2	6791300	0.385163
Q8C3X2;Q8C3X2-2	Q8C3X2;Q8C3X2-2	Coiled-coil domain-containing protein 90B, mitochondrial	Ccdc90b	83000000	3.23541
Q8CCK0;E9Q4Z0;E9PZH7	Q8CCK0;E9Q4Z0;E9PZH7	Core histone macro-H2A.2;Histone H2A	H2afy2	5920900	0.440665
Q9CW46;Q9CW46-2	Q9CW46	Ribonucleoprotein PTB-binding 1	Raver1	1432500	0.332292
P21447	P21447	Multidrug resistance protein 1A	Abcb1a	154600	NaN
Q9CQQ8	Q9CQQ8	U6 snRNA-associated Sm-like protein LSm7	Lsm7	30100000	1.55456
Q9CQI3;D3YY93	Q9CQI3;D3YY93	Glia maturation factor beta	Gmfb	14300000	0.37287
Q9R1T2;Q9R1T2-2	Q9R1T2;Q9R1T2-2	SUMO-activating enzyme subunit 1	Sae1	3895300	0.253981
Q9EST5-2;E9QKP8;Q9EST5	Q9EST5-2;E9QKP8;Q9EST5	Acidic leucine-rich nuclear phosphoprotein 32 family member B	Anp32b	0	NaN
A2BFF7;O88487;A2BFF8;Q3TPJ8;A2BFF9;A2BFF5;E9PWC9;D3Z258	A2BFF7;O88487;A2BFF8;Q3TPJ8;A2BFF9;A2BFF5;E9PWC9	Cytoplasmic dynein 1 intermediate chain 2	Dync1i2	128000000	1.04372
Q3TVI6;Q8K3G9;D3Z340;H3BL43;D6RFR7;H3BJX0	Q3TVI6;Q8K3G9	DCC-interacting protein 13-beta	Appl2	1673000	0.203853
Q8BWG8;E0CY53;E0CYB1	Q8BWG8	Beta-arrestin-1	Arrb1	8304300	0.267881
P11679	P11679	Keratin, type II cytoskeletal 8	Krt8	815000000	0.100104
Q8CJ53;Q8CJ53-2;Q8CJ53-3;Q8CJ53-4	Q8CJ53;Q8CJ53-2;Q8CJ53-3;Q8CJ53-4	Cdc42-interacting protein 4	Trip10	8738900	1.53893
A2A765;P70353;Q3U114;A2A763;A2A762	A2A765;P70353;Q3U114;A2A763	Nuclear transcription factor Y subunit gamma	Nfyc	1922300	0.558847
Q9D2P4	Q9D2P4	Ubiquitin-related modifier 1 homolog	Urm1	1738100	NaN
Q921W0	Q921W0	Charged multivesicular body protein 1a	Chmp1a	8915000	0.978378
Q8R5C5	Q8R5C5	Beta-centractin	Actr1b	8286500	0.557631
F6YBI4;Q80ZZ0;Q9WVK4;F6Y7R7	F6YBI4;Q80ZZ0;Q9WVK4;F6Y7R7	EH domain-containing protein 1	Ehd1	206000000	0.761673
Q6NZD2;Q9WV80;D3YWH1	Q6NZD2;Q9WV80	Sorting nexin-1	Snx1	82400000	0.277948
Q7TNC4;E9QNA0;Q05CX5;Q7TNC4-3;E9PXU4;E9PZ93;Q7TNC4-2;E9PX54;E9Q715	Q7TNC4;E9QNA0;Q05CX5;Q7TNC4-3;E9PXU4;E9PZ93;Q7TNC4-2;E9PX54;E9Q715	Putative RNA-binding protein Luc7-like 2	Luc7l2	22900000	0.707514
Q3UBX0;D3Z0I8;D3YX08;D3Z3Z2;D3Z7P2	Q3UBX0;D3Z0I8;D3YX08;D3Z3Z2;D3Z7P2	Transmembrane protein 109	Tmem109	1309000	0.235427
A2AR41;Q9ESL4;Q3TRG2;Q9ESL4-2;Q9ESL4-3;A2ASW6	A2AR41;Q9ESL4;Q3TRG2;Q9ESL4-2;Q9ESL4-3	Mitogen-activated protein kinase kinase kinase MLT	B230120H23Rik;Mltk	9248600	0.967773
Q920D3;D3YWT4	Q920D3;D3YWT4	Mediator of RNA polymerase II transcription subunit 28	Med28	0	NaN
P04444;Q5EBL1;P04443	P04444;Q5EBL1	Hemoglobin subunit beta-H1	Hbb-bh1	76400000	1.49187
Q6PFA2;B1AWE0	Q6PFA2;B1AWE0		Clta	14400000	0.591576
Q91WG2;Q91WG2-2;Q91WG2-1;D6RCU7	Q91WG2;Q91WG2-2;Q91WG2-1	Rab GTPase-binding effector protein 2	Rabep2	1178400	0.37379
Q8BJU0;Q8BJU0-2	Q8BJU0;Q8BJU0-2	Small glutamine-rich tetratricopeptide repeat-containing protein alpha	Sgta	33800000	1.15276
A2AWH6;Q8BKZ9;A2AWH8;A2AWH7	A2AWH6;Q8BKZ9	Pyruvate dehydrogenase protein X component, mitochondrial	Pdhx	379000000	3.19898
O88848-2;O88848;Q3TUM2;E9PZG3;D3Z067	O88848-2;O88848;Q3TUM2;E9PZG3;D3Z067	ADP-ribosylation factor-like protein 6	Arl6	583690	NaN
A2ADL9;Q63ZW7;A2ADS6;A2ADM0;Q63ZW7-2;A2ADM3;Q63ZW7-3;A2ADM2;Q63ZW7-4;Q63ZW7-6;A2ADS8;Q63ZW7-5;Q3UWX0	A2ADL9;Q63ZW7;A2ADS6;A2ADM0;Q63ZW7-2;A2ADM3;Q63ZW7-3;A2ADM2;Q63ZW7-4	InaD-like protein	Inadl	0	NaN
F6XUF0;E9QNA7;Q62417-7;Q62417-2;E9Q6A3;F6PZD9;Q62417-4;Q62417-6;Q62417-5	F6XUF0;E9QNA7;Q62417-7;Q62417-2;E9Q6A3;F6PZD9;Q62417-4;Q62417-6;Q62417-5		Sorbs1	12700000	2.17231
Q8R1N0	Q8R1N0	Zinc finger protein 830	Znf830	0	NaN
P84096;Q3UDZ1	P84096;Q3UDZ1	Rho-related GTP-binding protein RhoG	Rhog	921980	0.186365
Q8K2K6;Q8K2K6-1;Q8K2K6-3;Q8K2K6-2	Q8K2K6;Q8K2K6-1;Q8K2K6-3;Q8K2K6-2	Arf-GAP domain and FG repeat-containing protein 1	Agfg1	8098200	0.62054
Q62426	Q62426	Cystatin-B	Cstb	11200000	0.390564
Q60597;Q60597-2;E9Q1C6	Q60597;Q60597-2	2-oxoglutarate dehydrogenase, mitochondrial	Ogdh	36800000	0.694589
Q8BH40;O70439	Q8BH40;O70439	Syntaxin-7	Stx7	620200	0.21019
Q9CWY8;F6RP29;Q05C51	Q9CWY8;F6RP29;Q05C51	Ribonuclease H2 subunit A;Ribonuclease	Rnaseh2a	0	NaN
Q3U422	Q3U422		Ndufv3	119000000	1.00099
O08788;E9Q3M3;O08788-2;E9Q586;D3YX34;D3YYG9;D3Z2M9	O08788;E9Q3M3;O08788-2;E9Q586;D3YX34	Dynactin subunit 1	Dctn1	34700000	0.455063
H7BXB7;P61979-2;Q5FWJ5;P61979;D3YWG1;H3BK96;H3BLL4	H7BXB7;P61979-2;Q5FWJ5;P61979;D3YWG1;H3BK96;H3BLL4	Heterogeneous nuclear ribonucleoprotein K	Hnrnpk;Gm7964	10700000	0.866476
Q8K0G5	Q8K0G5	Protein TSSC1	Tssc1	926660	NaN
Q3UY68;Q91YS8;D3Z368	Q3UY68;Q91YS8	Calcium/calmodulin-dependent protein kinase type 1	Camk1	10700000	0.382438
O55023;Q924B0;Q80ZJ2;D3Z703	O55023;Q924B0;Q80ZJ2	Inositol monophosphatase 1	Impa1	39700000	0.522603
Q9JHS3;D3YTS4	Q9JHS3;D3YTS4	Ragulator complex protein LAMTOR2	Lamtor2	4708200	1.11813
Q8K3D3-2;E3WH32;Q8K3D3;A2AN40	Q8K3D3-2;E3WH32;Q8K3D3;A2AN40	DNA repair protein SWI5 homolog	Swi5	9276900	0.935016
Q3UM45;F6TGJ2	Q3UM45	Protein phosphatase 1 regulatory subunit 7	Ppp1r7	185000000	1.35615
Q8C147;Q8C147-2	Q8C147	Dedicator of cytokinesis protein 8	Dock8	2565200	NaN
Q3TM10;Q6PGH2;Q6UY53	Q3TM10;Q6PGH2	Hematological and neurological expressed 1-like protein	Hn1l	2292400	0.298107
A2AAV4;Q8BYA0	A2AAV4;Q8BYA0	Tubulin-specific chaperone D	Tbcd	37650	NaN
Q8C2Q7;O35737;Q811L7	Q8C2Q7;O35737;Q811L7	Heterogeneous nuclear ribonucleoprotein H;Heterogeneous nuclear ribonucleoprotein H, N-terminally processed	Hnrnph1	86900000	0.581193
Q3UYX6;Q9R0U0;Q9R0U0-2;Q3UA07;Q9R0U0-3;Q3TFP0	Q3UYX6;Q9R0U0;Q9R0U0-2;Q3UA07;Q9R0U0-3;Q3TFP0	Serine/arginine-rich splicing factor 10	Srsf10	0	NaN
Q8C181-4;Q8C181	Q8C181-4;Q8C181	Muscleblind-like protein 2	Mbnl2	1737200	0.295718
Q505L1;Q9Z2N8;D3YVN1	Q505L1;Q9Z2N8;D3YVN1	Actin-like protein 6A	Actl6a	3754800	0.389241
Q9CYA0	Q9CYA0	Cysteine-rich with EGF-like domain protein 2	Creld2	1396500	0.219887
P08752;Q8JZT4	P08752;Q8JZT4	Guanine nucleotide-binding protein G(i) subunit alpha-2	Gnai2	19300000	0.202032
Q3U6P5;Q9Z204;Q9Z204-2;Q9Z204-5;Q9Z204-3;Q9Z204-4	Q3U6P5;Q9Z204;Q9Z204-2;Q9Z204-5;Q9Z204-3;Q9Z204-4	Heterogeneous nuclear ribonucleoproteins C1/C2	Hnrnpc	69500000	0.577501
Q9D287;D6RGA5	Q9D287	Pre-mRNA-splicing factor SPF27	Bcas2	5150500	0.435711
Q9CY50;E9Q9A7	Q9CY50;E9Q9A7	Translocon-associated protein subunit alpha	Ssr1	7537800	0.425641
Q08024;Q08024-2;Q08024-3;Q08024-4	Q08024;Q08024-2;Q08024-3;Q08024-4	Core-binding factor subunit beta	Cbfb	2284000	0.340425
Q9D1A2;F6XEL6	Q9D1A2;F6XEL6	Cytosolic non-specific dipeptidase	Cndp2	126000000	0.265083
F8WH86;P62869	F8WH86;P62869	Transcription elongation factor B polypeptide 2	Tceb2	122000000	2.06988
Q80YX1;Q80YX1-2;E9QKW5;Q80YX1-3;E9QM59;Q80YX1-4;E9QM60;Q80YX1-5;Q80YX0	Q80YX1;Q80YX1-2;E9QKW5;Q80YX1-3;E9QM59;Q80YX1-4;E9QM60;Q80YX1-5	Tenascin	Tnc	1995800	0.299688
Q9ES52;Q9ES52-2;Q9ES52-3;Q9ES52-4;Q9ES52-5;Q9ES52-6;F7BZA7	Q9ES52;Q9ES52-2;Q9ES52-3;Q9ES52-4;Q9ES52-5;Q9ES52-6	Phosphatidylinositol 3,4,5-trisphosphate 5-phosphatase 1	Inpp5d	215580	NaN
Q8BGB7;Q8BGB7-2	Q8BGB7;Q8BGB7-2	Enolase-phosphatase E1	Enoph1	4060000	0.419886
B1AY07;Q9D7S9	B1AY07;Q9D7S9	Charged multivesicular body protein 5	Chmp5	18700000	0.975134
Q3UVN5;Q9CZ44-3;Q9CZ44;A2AT02;Q9CZ44-2	Q3UVN5;Q9CZ44-3;Q9CZ44;A2AT02	NSFL1 cofactor p47	Nsfl1c	100000000	1.34494
Q9D9Z5;D3Z6F8	Q9D9Z5;D3Z6F8	DET1- and DDB1-associated protein 1	Dda1	894350	0.468604
Q8CGU1;E9Q7U2	Q8CGU1;E9Q7U2	Calcium-binding and coiled-coil domain-containing protein 1	Calcoco1	0	NaN
Q99J45;D3YUV1;F7AZ06;F7C5I8;F7C033	Q99J45;D3YUV1	Nuclear receptor-binding protein	Nrbp1	102000000	1.32286
O09106;Q58E49;D3YYI8	O09106;Q58E49;D3YYI8	Histone deacetylase 1;Histone deacetylase	Hdac1;Gm10093	4160700	0.187769
B1AS53;P70698	B1AS53;P70698	CTP synthase 1	Ctps	11300000	0.304146
Q3UFK8	Q3UFK8	FERM domain-containing protein 8	Frmd8	848390	0.432545
P40142;E0CY51	P40142	Transketolase	Tkt	332000000	0.129287
Q3UMT1;F6XWD4;F7AEB9	Q3UMT1;F6XWD4	Protein phosphatase 1 regulatory subunit 12C	Ppp1r12c	2226800	0.518941
Q9ERG2;B2RQS1;B3STQ1;E9Q9D7	Q9ERG2;B2RQS1	Striatin-3	Strn3	22800000	1.05117
E9QKR0;P62880;Q3U9V4;D3YZX3;D3Z1M1;D3Z1T4	E9QKR0;P62880;Q3U9V4;D3YZX3;D3Z1M1;D3Z1T4	Guanine nucleotide-binding protein G(I)/G(S)/G(T) subunit beta-2	Gnb2	34800000	0.532652
Q93092	Q93092	Transaldolase	Taldo1	404000000	0.305839
Q9ES97;Q9ES97-2;Q9ES97-5;Q9ES97-4	Q9ES97;Q9ES97-2;Q9ES97-5	Reticulon-3	Rtn3	7513200	0.218727
P62259;Q5SS40;D6REF3;F6WA09	P62259;Q5SS40;D6REF3;F6WA09	14-3-3 protein epsilon	Ywhae	2000000000	0.59891
Q543J4;Q62264	Q543J4;Q62264	Thyroid hormone-inducible hepatic protein	Thrsp	2969300	0.151375
Q60973;A2AFJ1;A2AFI9;F6ZLC6;F6U539	Q60973;A2AFJ1;A2AFI9	Histone-binding protein RBBP7	Rbbp7	62800000	0.616029
Q60930;G3UX26;D3YZT5;D3YUN8	Q60930;G3UX26;D3YZT5	Voltage-dependent anion-selective channel protein 2	Vdac2	831000000	1.13551
Q6A028	Q6A028	Switch-associated protein 70	Swap70	5742100	0.169382
Q3THE2	Q3THE2	Myosin regulatory light chain 12B	Myl12b	19300000	0.574515
O35350;Q3TI07	O35350;Q3TI07	Calpain-1 catalytic subunit	Capn1	10200000	0.192108
P97310	P97310	DNA replication licensing factor MCM2	Mcm2	804560	0.218924
P42208;E9Q3V6;D3Z3C0;D3YYB1;F6WYM0;D3Z1S1;D3YZU7;F6UKN5;D3YV76;G3UYQ0	P42208;E9Q3V6;D3Z3C0;D3YYB1;F6WYM0	Septin-2	2020-09-02	165000000	0.967118
F6PZC9;Q62417	F6PZC9;Q62417	Sorbin and SH3 domain-containing protein 1	Sorbs1	120000000	2.72829
Q4KMM3;Q4KMM3-4;Q4KMM3-2;Q4KMM3-3;F8WGG8;B1H3M0	Q4KMM3;Q4KMM3-4;Q4KMM3-2;Q4KMM3-3	Oxidation resistance protein 1	Oxr1	16200000	0.44619
A2A9X6;Q9JM14;A2A9X5	A2A9X6;Q9JM14;A2A9X5	5(3)-deoxyribonucleotidase, cytosolic type	Nt5c	16000000	0.593648
A2AH73;Q9DCD0	A2AH73;Q9DCD0	6-phosphogluconate dehydrogenase, decarboxylating	Pgd	42300000	0.161642
Q9D881;E9PWM0;P19536	Q9D881;E9PWM0;P19536	Cytochrome c oxidase subunit 5B, mitochondrial	Cox5b	1170000000	6.46621
P58389;Q543N6;A2AWE9;A2AWF0;B7ZDE0;D6RFC2;F6Z6I0	P58389;Q543N6;A2AWE9;A2AWF0	Serine/threonine-protein phosphatase 2A activator	Ppp2r4	15000000	0.400818
Q8K3X4	Q8K3X4	Interferon regulatory factor 2-binding protein-like	Irf2bpl	435740	0.299177
P40124;B1ARS0	P40124	Adenylyl cyclase-associated protein 1	Cap1	181000000	0.380575
O88653;Q542I7	O88653;Q542I7	Ragulator complex protein LAMTOR3	Lamtor3;Mapksp1	30100000	0.940645
H7BX95;Q6PDM2;Q6PDM2-2;Q6PDM2-3	H7BX95;Q6PDM2;Q6PDM2-2;Q6PDM2-3	Serine/arginine-rich splicing factor 1	Srsf1	65400000	0.336496
D3Z656;Q8CHC4;F7BQW7;E9Q7S0;D3Z1M7;F7CD11;F6VSS8;F6XIX0	D3Z656;Q8CHC4;F7BQW7;E9Q7S0	Synaptojanin-1	Synj1	11200000	0.313499
Q9JHJ0	Q9JHJ0	Tropomodulin-3	Tmod3	107000000	1.03215
Q9CPP6;D3YTQ8	Q9CPP6;D3YTQ8	NADH dehydrogenase [ubiquinone] 1 alpha subcomplex subunit 5	Ndufa5	1930000000	3.53107
A6PWS1;Q9QZ06;A9JEI5;Q8C5G6	A6PWS1;Q9QZ06;A9JEI5	Toll-interacting protein	Tollip	7144300	2.27775
Q9ES28;Q9ES28-7;Q9ES28-2;Q9ES28-4;Q9ES28-3;Q9ES28-5;Q9ES28-6	Q9ES28;Q9ES28-7;Q9ES28-2;Q9ES28-4;Q9ES28-3;Q9ES28-5;Q9ES28-6	Rho guanine nucleotide exchange factor 7	Arhgef7	3923200	0.256069
Q8R1A4;A2A9M5;Q8R1A4-2;E9PX48;A2A9M4;F6ZJ55;A2AW79	Q8R1A4;A2A9M5;Q8R1A4-2;E9PX48	Dedicator of cytokinesis protein 7	Dock7	0	NaN
Q8CGP2-2;Q921L4;Q8CBB6;B2RVD5;P10853;Q64475;Q8CGP1;Q8CGP2;P70696;G3X9D5	Q8CGP2-2;Q921L4;Q8CBB6;B2RVD5;P10853;Q64475;Q8CGP1;Q8CGP2;P70696;G3X9D5	Histone H2B;Histone H2B type 1-F/J/L;Histone H2B type 1-B;Histone H2B type 1-K;Histone H2B type 1-P;Histone H2B type 1-A	Gm13646;Hist1h2bk;Hist1h2bf;Hist1h2bb;Hist1h2bp;Hist1h2ba;Hist2h2bb	0	NaN
Q5EBP9;Q62318;Q62318-2	Q5EBP9;Q62318;Q62318-2	Transcription intermediary factor 1-beta	Trim28	40600000	0.246336
Q5U3K5	Q5U3K5	Rab-like protein 1	Parf	417790	0.182842
P63087-2;P63087;Q6ZWM8	P63087-2;P63087;Q6ZWM8	Serine/threonine-protein phosphatase PP1-gamma catalytic subunit;Serine/threonine-protein phosphatase	Ppp1cc	19300000	0.435711
Q8C3J5;Q5SRI3;D6RGU3;Q3TMS1	Q8C3J5;Q5SRI3;D6RGU3	Dedicator of cytokinesis protein 2	Dock2	7894200	0.401429
Q9CR26;E9Q194;F6W5Q8;F8WJC2	Q9CR26;E9Q194;F6W5Q8	Vacuolar protein sorting-associated protein VTA1 homolog	Vta1	16900000	0.383921
P62322	P62322	U6 snRNA-associated Sm-like protein LSm5	Lsm5	3211400	NaN
P21619;P21619-2;Q3V159	P21619;P21619-2;Q3V159	Lamin-B2	Lmnb2	165000000	0.961816
Q3V100;Q924M7;F6Q3K8	Q3V100;Q924M7	Mannose-6-phosphate isomerase	Mpi	57300000	0.763942
B2KGQ2;Q9D0M5;D6RIN4	B2KGQ2;Q9D0M5;D6RIN4	Dynein light chain 2, cytoplasmic	Dynll2	41900000	0.671366
Q9D6L8;Q9D6L8-2	Q9D6L8	Peptidyl-prolyl cis-trans isomerase-like 3	Ppil3	1281600	NaN
Q8BH59	Q8BH59	Calcium-binding mitochondrial carrier protein Aralar1	Slc25a12	104000000	1.34642
Q542Y0;Q64669	Q542Y0;Q64669	NAD(P)H dehydrogenase [quinone] 1	Nqo1	77100000	1.15397
A2CFD0;Q7TNE3;Q5SX56	A2CFD0;Q7TNE3	Sperm-associated antigen 7	Spag7	57300000	4.67377
P61971	P61971	Nuclear transport factor 2	Nutf2	90400000	1.79733
O08797	O08797		Serpinb9	14100000	0.496648
Q9WTS5;B9EJ72	Q9WTS5;B9EJ72	Teneurin-2	Odz2	192000000	7.74293
P50396;B7FAU8	P50396	Rab GDP dissociation inhibitor alpha	Gdi1	79900000	0.39185
E9Q975;A2AA29;Q62093	E9Q975;A2AA29;Q62093	Serine/arginine-rich splicing factor 2	Srsf2	30700000	0.387777
P51125-6;Q8CE80;P51125;P51125-2;P51125-3;P51125-7;Q921U7;Q8CE04;P51125-4;P51125-5	P51125-6;Q8CE80;P51125;P51125-2;P51125-3;P51125-7;Q921U7;Q8CE04;P51125-4;P51125-5	Calpastatin	Cast	180000000	0.919794
Q5SUS9;Q61545;Q5SUT0	Q5SUS9;Q61545;Q5SUT0	RNA-binding protein EWS	Ewsr1	17700000	0.630358
E0CZ72;P28740-1;P28740;P28740-2;F8VQ42;Q9D481;F6SUU5	E0CZ72;P28740-1;P28740;P28740-2;F8VQ42	Kinesin-like protein KIF2A	Kif2a	517440	0.161543
A2RTH5	A2RTH5		Lcmt1	8168300	0.424665
Q3UNZ8;Q3UNZ8-2	Q3UNZ8	Quinone oxidoreductase-like protein 2		3623100	0.110426
Q9JHS9	Q9JHS9	Protein CWC15 homolog	Cwc15	3821600	0.672404
Q91WV0	Q91WV0	Protein Dr1	Dr1	8222900	0.722595
F8VQ95;Q6Y685;Q6Y685-2	F8VQ95;Q6Y685;Q6Y685-2	Transforming acidic coiled-coil-containing protein 1	Tacc1	5256700	0.42461
Q8BL97;F8WH59;Q3THA6;Q8BL97-2;Q8BL97-4;Q8BL97-3	Q8BL97;F8WH59;Q3THA6;Q8BL97-2;Q8BL97-4;Q8BL97-3	Serine/arginine-rich splicing factor 7	Srsf7	4959100	0.394602
P56391	P56391	Cytochrome c oxidase subunit 6B1	Cox6b1	2190000000	4.7735
Q99JF8;Q99JF8-2;A2BI13;F6RB63	Q99JF8;Q99JF8-2;A2BI13;F6RB63	PC4 and SFRS1-interacting protein	Psip1	10200000	0.316426
H7BWY8;Q8C8T8	H7BWY8;Q8C8T8	Pre-rRNA-processing protein TSR2 homolog	Tsr2	3984300	0.753125
A3KGQ6;Q9D898	A3KGQ6;Q9D898	Actin-related protein 2/3 complex subunit 5;Actin-related protein 2/3 complex subunit 5-like protein	Arpc5l	35600000	1.29492
Q8R2E9	Q8R2E9	ERO1-like protein beta	Ero1lb	2083700	0.119881
Q5ND51;Q64010;Q5ND50;F7D232;Q64010-2;Q8JZR2	Q5ND51;Q64010;Q5ND50;F7D232;Q64010-2;Q8JZR2	Adapter molecule crk	Crk	40800000	1.35035
P61082;F7CDT0;F6WMC0;F6YXS3	P61082;F7CDT0;F6WMC0;F6YXS3	NEDD8-conjugating enzyme Ubc12	Ube2m	16200000	1.33577
Q9D394-3;Q9D394	Q9D394-3;Q9D394	Protein RUFY3	Rufy3	7669300	0.194114
Q60598;Q921L6	Q60598;Q921L6	Src substrate cortactin	Cttn	103000000	0.437445
Q9R1R2;Q3TDT0	Q9R1R2;Q3TDT0	Tripartite motif-containing protein 3	Trim3	71643	NaN
Q571J7;Q6P1F6;Q9CWU3;Q6ZWR4-2;Q6ZWR4;Q6ZWR4-3	Q571J7;Q6P1F6;Q9CWU3	Serine/threonine-protein phosphatase 2A 55 kDa regulatory subunit B alpha isoform	Ppp2r2a	24900000	0.640246
Q4VBX4;Q9D2M8;A6X925;Q9D2M8-2;B2KF55	Q4VBX4;Q9D2M8;A6X925;Q9D2M8-2	Ubiquitin-conjugating enzyme E2 variant 2	Ube2v2	51000000	1.19546
P70158;D3Z1B4	P70158	Acid sphingomyelinase-like phosphodiesterase 3a	Smpdl3a	6832900	0.385134
Q8BFW7;Q8BFW7-5;Q8BFW7-4;Q8BFW7-2;Q8BFW7-3	Q8BFW7;Q8BFW7-5;Q8BFW7-4;Q8BFW7-2;Q8BFW7-3	Lipoma-preferred partner homolog	Lpp	13300000	0.234814
Q9JJU8	Q9JJU8	SH3 domain-binding glutamic acid-rich-like protein	Sh3bgrl	0	NaN
Q9DBB5;H3BJN7	Q9DBB5	Eukaryotic translation initiation factor 4E type 3	Eif4e3	30500000	1.15136
E9QMF9;Q8BFV2;E9Q1N1;E9Q1H5	E9QMF9;Q8BFV2;E9Q1N1	PCI domain-containing protein 2	Pcid2	0	NaN
Q8BRN9;F6XC25;H3BKI0	Q8BRN9;F6XC25	Coiled-coil and C2 domain-containing protein 1B	Cc2d1b	258830	NaN
Q9Z331;Q3UV11	Q9Z331;Q3UV11	Keratin, type II cytoskeletal 6B	Krt6b	1358100	NaN
O35900;Q3U9X2;O35901;Q9EP83;G3UZ96	O35900;Q3U9X2;O35901;Q9EP83	U6 snRNA-associated Sm-like protein LSm2	Lsm2	52400000	1.03002
Q61029;Q3TNH0;Q61029-3;Q61029-2;Q61033-2;F6QXX3;Q3TXQ1	Q61029;Q3TNH0;Q61029-3;Q61029-2	Lamina-associated polypeptide 2, isoforms beta/delta/epsilon/gamma	Tmpo	15400000	0.365444
P61148;Q6ZWS1	P61148;Q6ZWS1	Fibroblast growth factor 1	Fgf1	5224300	3.56901
Q8CI51	Q8CI51	PDZ and LIM domain protein 5	Pdlim5	946000000	7.99552
G5E8S8;Q8BVD5;Q8BVD5-2;Q8BVD5-3;F8WGQ7;Q8BVD5-4;Q8BVD5-5	G5E8S8;Q8BVD5	MAGUK p55 subfamily member 7	Mpp7	5371700	0.463092
P51863	P51863	V-type proton ATPase subunit d 1	Atp6v0d1	5234100	0.214055
O55106;F8WH41;F6Z700	O55106;F8WH41	Striatin	Strn	3308900	2.29022
F6XLC7;Q4FK11;Q99K48;Q99K48-2;B1AXT0	F6XLC7;Q4FK11;Q99K48;Q99K48-2	Non-POU domain-containing octamer-binding protein	Nono	113000000	0.58572
Q5J9A9;Q9CQP2;A2AFP1	Q5J9A9;Q9CQP2	Trafficking protein particle complex subunit 2	Trappc2	198690	NaN
E9Q4T6;Q62189;D3Z0S6;D6RI83	E9Q4T6;Q62189;D3Z0S6	U1 small nuclear ribonucleoprotein A	Snrpa	6552500	0.610985
P28661;P28661-2;P28661-3;P28661-4;P28661-5;Q5ND13;Q5ND09;Q5ND18;P28661-6	P28661;P28661-2;P28661-3;P28661-4;P28661-5;Q5ND13;Q5ND09	Septin-4	2020-09-04	6769300	0.83167
Q9CXU9	Q9CXU9	Eukaryotic translation initiation factor 1b	Eif1b	3146700	0.694879
O35744;Q3U462;F6RU51	O35744;Q3U462	Chitinase-3-like protein 3	Chi3l3	1176100	0.164466
F8WGM5;Q548T0;Q64324	F8WGM5;Q548T0;Q64324	Syntaxin-binding protein 2	Stxbp2	4978900	0.47288
Q9CWZ3;Q9CWZ3-2	Q9CWZ3;Q9CWZ3-2	RNA-binding protein 8A	Rbm8a	11700000	0.721709
Q6ZWQ9;D3Z249	Q6ZWQ9		Myl12a	29700000	0.721605
P49717;Q542F4;F6Z957	P49717;Q542F4;F6Z957	DNA replication licensing factor MCM4	Mcm4	1060700	0.103905
P53702;Q6P5G5;G3UXK7	P53702;Q6P5G5	Cytochrome c-type heme lyase	Hccs	18200000	1.39353
Q8BGN3;D3YU63	Q8BGN3;D3YU63	Ectonucleotide pyrophosphatase/phosphodiesterase family member 6;Ectonucleotide pyrophosphatase/phosphodiesterase family member 6 soluble form	Enpp6	0	NaN
P48774;E9PVM7;E9PV63;E9Q024	P48774;E9PVM7;E9PV63	Glutathione S-transferase Mu 5	Gstm5	17200000	0.247782
Q8K3H0	Q8K3H0	DCC-interacting protein 13-alpha	Appl1	5496100	0.481951
P06745;F6SAC3	P06745;F6SAC3	Glucose-6-phosphate isomerase	Gpi;Gm1840	608000000	0.331719
P43277;Q149Z9;P15864;Q5SZA3;Q07133	P43277;Q149Z9;P15864;Q5SZA3	Histone H1.3;Histone H1.2	Hist1h1d;Hist1h1c	237000000	1.00901
Q569X3;Q62241	Q569X3;Q62241	U1 small nuclear ribonucleoprotein C	Snrpc	5745600	0.42983
Q3V214;Q80UW8	Q3V214;Q80UW8	DNA-directed RNA polymerases I, II, and III subunit RPABC1	Polr2e	3148500	0.507305
Q9CQ71	Q9CQ71	Replication protein A 14 kDa subunit	Rpa3	2611200	1.42037
P52431;D6RFB8	P52431;D6RFB8	DNA polymerase delta catalytic subunit;DNA polymerase	Pold1	0	NaN
P63005;Q5SW18;P63005-2;Q5SW16	P63005;Q5SW18;P63005-2	Platelet-activating factor acetylhydrolase IB subunit alpha	Pafah1b1	71600000	0.448049
Q541Z2;Q61239	Q541Z2;Q61239	Protein farnesyltransferase/geranylgeranyltransferase type-1 subunit alpha	Fnta	4077100	0.718546
P43247;Q3TZI5;G3UXD8	P43247;Q3TZI5	DNA mismatch repair protein Msh2	Msh2	2115300	0.155628
E9Q6E5;Q3UIX4;D3Z4B0;Q8BV04;B7ZNC5;D6RE22;F7B0U9;F6TN80	E9Q6E5;Q3UIX4;D3Z4B0		Srsf11	0	NaN
Q9Z2L7;Q9Z2L7-2	Q9Z2L7;Q9Z2L7-2	Cytokine receptor-like factor 3	Crlf3	743280	0.24867
Q5M9P5;Q8K3J1	Q5M9P5;Q8K3J1	NADH dehydrogenase [ubiquinone] iron-sulfur protein 8, mitochondrial	Ndufs8	90200000	9.74279
Q544R8;Q9ES56;Q3V493	Q544R8;Q9ES56;Q3V493	Trafficking protein particle complex subunit 4	Trappc4	7394200	0.423908
Q7TMY4;Q7TMY4-2	Q7TMY4;Q7TMY4-2	THO complex subunit 7 homolog	Thoc7	9557500	0.416649
Q3UID0;Q6PDG5;Q6PDG5-2	Q3UID0;Q6PDG5;Q6PDG5-2	SWI/SNF complex subunit SMARCC2	Smarcc2	9217900	0.330295
Q06770;D3Z548	Q06770;D3Z548	Corticosteroid-binding globulin	Serpina6	109000000	12.013
B1AT62;Q8R3E3;B1AT63;Q8R3E3-2	B1AT62;Q8R3E3;B1AT63;Q8R3E3-2	WD repeat domain phosphoinositide-interacting protein 1	Wipi1	420060	0.512637
Q4U2R1;Q4U2R1-2;F8WJE1	Q4U2R1;Q4U2R1-2;F8WJE1	E3 ubiquitin-protein ligase HERC2	Herc2	12500000	0.26302
Q9CPU5;Q78HG1;E9Q4D9;Q9WVB0	Q9CPU5;Q78HG1;E9Q4D9;Q9WVB0	RNA-binding protein with multiple splicing	Rbpms	34800000	5.1975
Q8VCX5-2;Q8VCX5-3;Q8VCX5;E9Q9E0;F6Z1Z9	Q8VCX5-2;Q8VCX5-3;Q8VCX5	Calcium uptake protein 1, mitochondrial	Micu1	602110	0.146821
E9Q9F5;O55131;E9Q1G8;E9Q7K8	E9Q9F5;O55131;E9Q1G8	Septin-7	2020-09-07	79900000	0.328332
Q6PEB6;E0CXA9;E0CYJ0;G8JL35	Q6PEB6;E0CXA9;E0CYJ0;G8JL35	MOB-like protein phocein	Mob4	953560	NaN
Q9JLQ0	Q9JLQ0	CD2-associated protein	Cd2ap	19100000	0.266468
G3UVU2;G5E834;Q62203;D3YW09;D3Z5A6	G3UVU2;G5E834;Q62203;D3YW09	Splicing factor 3A subunit 2	Sf3a2	8383000	0.708115
G3UW94;Q14C24;Q9D883;Q8BGJ9;E9Q5J3;E9Q1I7;E9PXR5;E9PUZ3;E9Q5Y2;F8WH71;E9Q809;E9PWM2;E9PWX6;F7D8X7	G3UW94;Q14C24;Q9D883;Q8BGJ9;E9Q5J3;E9Q1I7;E9PXR5;E9PUZ3;E9Q5Y2;F8WH71;E9Q809	Splicing factor U2AF 35 kDa subunit;Splicing factor U2AF 26 kDa subunit	U2af1;U2af1l4	2386000	0.330578
Q11011;E9Q039;F6QYF8;E9Q6F4;F6V7K3;F7ANF4	Q11011;E9Q039;F6QYF8;E9Q6F4	Puromycin-sensitive aminopeptidase	Npepps	31900000	0.288243
Q3U8S0;Q9DCR2;G3XA56	Q3U8S0;Q9DCR2;G3XA56	AP-3 complex subunit sigma-1	Ap3s1;Ap3s1-ps2	1568500	0.220051
P70441;Q3TG37;P70441-2	P70441;Q3TG37	Na(+)/H(+) exchange regulatory cofactor NHE-RF1	Slc9a3r1	54500000	0.13283
Q9Z0U1	Q9Z0U1	Tight junction protein ZO-2	Tjp2	32200000	0.508001
P01869;P01868	P01869;P01868	Ig gamma-1 chain C region, membrane-bound form;Ig gamma-1 chain C region secreted form	Ighg1	6652200	0.551816
E9PYH8;Q60972	E9PYH8;Q60972	Histone-binding protein RBBP4	Rbbp4	45000000	0.35246
Q60715;Q60715-2;E9Q7B0	Q60715;Q60715-2;E9Q7B0	Prolyl 4-hydroxylase subunit alpha-1	P4ha1	3248300	0.562461
B2RUK2;Q80TH2-2;B7ZNX6;Q80TH2;Q80TH2-1;B2RUJ2	B2RUK2;Q80TH2-2;B7ZNX6;Q80TH2;Q80TH2-1;B2RUJ2	Protein LAP2	Erbb2ip	4533200	1.11713
P62962;Q5SX50;Q5SX49	P62962;Q5SX50;Q5SX49	Profilin-1;Profilin	Pfn1	532000000	0.363359
Q8K199;D3YZZ0;F8WHQ0;D6RD08;D6RJ47	Q8K199;D3YZZ0;F8WHQ0;D6RD08;D6RJ47	COX assembly mitochondrial protein 2 homolog	Cmc2;2310061C15Rik	68900000	4.58001
Q60749	Q60749	KH domain-containing, RNA-binding, signal transduction-associated protein 1	Khdrbs1	10900000	0.421941
Q99LY9;B1ARW4	Q99LY9;B1ARW4	NADH dehydrogenase [ubiquinone] iron-sulfur protein 5	Ndufs5	1160000000	4.7918
F8WIB9;Q3UDP0;B2RQV3;Q3UDP0-2;E9QK95	F8WIB9;Q3UDP0	WD repeat-containing protein 41	Wdr41	0	NaN
Q9QWG7-2;Q9QWG7	Q9QWG7-2;Q9QWG7	Sulfotransferase family cytosolic 1B member 1	Sult1b1	16200000	0.13708
Q61823	Q61823	Programmed cell death protein 4	Pdcd4	2743100	0.132636
A3KML5;P63082;E9Q9C5;D3Z3B2	A3KML5;P63082;E9Q9C5;D3Z3B2	V-type proton ATPase 16 kDa proteolipid subunit	Atp6v0c	2068300	0.170891
Q9WU28;H7BWX1;E9PVG3;E9Q093	Q9WU28;H7BWX1	Prefoldin subunit 5	Pfdn5	32800000	0.952018
P47754;Q5DQJ3;D6RCW7	P47754;Q5DQJ3;D6RCW7	F-actin-capping protein subunit alpha-2	Capza2	311000000	1.09909
Q3URD3;H7BX64;Q3URD3-2;D3Z7V3;F8WIH0;F6WY34	Q3URD3;H7BX64;Q3URD3-2;D3Z7V3;F8WIH0	Sarcolemmal membrane-associated protein	Slmap	61400000	3.62358
Q8K4Z5	Q8K4Z5	Splicing factor 3A subunit 1	Sf3a1	52400000	0.526565
Q9CPW4;Q3UA72;E9Q2K4	Q9CPW4;Q3UA72	Actin-related protein 2/3 complex subunit 5	Arpc5	31700000	0.429627
Q8C460;E9PZV1;Q8C460-2;Q8C460-3	Q8C460;E9PZV1;Q8C460-2	ERI1 exoribonuclease 3	Eri3	4024900	0.595699
Q3TDA7;Q9WVE8	Q3TDA7;Q9WVE8	Protein kinase C and casein kinase substrate in neurons protein 2	Pacsin2	128000000	1.07374
B2RRY4;Q9JLB2	B2RRY4;Q9JLB2	MAGUK p55 subfamily member 5	Mpp5	302700	0.0811622
Q8R4U7;E9Q9L3	Q8R4U7	Leucine zipper protein 1	Luzp1	1528000	0.250916
Q9R0P4;D3YVR9;D6RI64;D3YVS0	Q9R0P4;D3YVR9;D6RI64	Small acidic protein	Smap;1110004F10Rik	4219000	0.550539
Q9CYN2	Q9CYN2	Signal peptidase complex subunit 2	Spcs2	829810	NaN
Q8VHE6	Q8VHE6	Dynein heavy chain 5, axonemal	Dnah5	0	NaN
Q3THK3;E9Q7N7	Q3THK3;E9Q7N7	General transcription factor IIF subunit 1	Gtf2f1	317270	0.253646
Q5SYD0;Q5SYD0-2	Q5SYD0;Q5SYD0-2	Unconventional myosin-Id	Myo1d	5259900	0.121396
E9Q1P8	E9Q1P8		Irf2bp2	1536800	NaN
Q9WV03;Q05AF0;Q9WTJ8	Q9WV03;Q05AF0;Q9WTJ8	Protein FAM50A;Protein FAM50B	Fam50a;Fam50b	6238500	0.753182
P01837	P01837	Ig kappa chain C region		298000000	1.38883
Q80U27;Q3UHC4;Q61771;Q6P1D3;E9Q7A2	Q80U27;Q3UHC4;Q61771	Kinesin-like protein KIF3B	Kif3b	1069400	0.495221
Q0VG47;Q8BG05-2;Q5FB19;Q8BG05;B2RXM2;A2AL12;E9Q7H5;F8VPW0;A2AL13	Q0VG47;Q8BG05-2;Q5FB19;Q8BG05;B2RXM2;A2AL12;E9Q7H5;F8VPW0	Heterogeneous nuclear ribonucleoprotein A3	Hnrnpa3;Gm6793;Gm8991;Gm7551	309000000	0.262261
Q06138;D3YV52;D3Z704	Q06138	Calcium-binding protein 39	Cab39	31000000	0.346332
E9PVM4;E9Q8D6;B2M1R6;P61979-3;D3Z5X4;H3BKD0;H3BKI8;Q8BT23;H3BJ43;H3BJS9;H3BLP7	E9PVM4;E9Q8D6;B2M1R6;P61979-3;D3Z5X4;H3BKD0;H3BKI8		Hnrnpk;Gm7964	274000000	0.495368
E0CZB3;E0CXL7;E9QJZ1;Q9EPV8;E0CY38;E0CYW1;E0CY91;E9Q068	E0CZB3;E0CXL7;E9QJZ1;Q9EPV8;E0CY38;E0CYW1;E0CY91;E9Q068	Ubiquitin-like protein 5	Ubl5;Gm2001;Gm6803	6258100	0.713572
P67871;G3UXG7;G3UZJ5	P67871;G3UXG7;G3UZJ5	Casein kinase II subunit beta	Csnk2b	4178900	0.517598
P27870;Q3U9E2;E9PXI0;Q8VDU4;Q3V0U7	P27870;Q3U9E2;E9PXI0;Q8VDU4	Proto-oncogene vav	Vav1	472970	0.336236
Q8BTZ4;Q8BTZ4-2	Q8BTZ4;Q8BTZ4-2	Anaphase-promoting complex subunit 5	Anapc5	780640	0.200674
Q60932;Q60932-2;F2Z471	Q60932;Q60932-2;F2Z471	Voltage-dependent anion-selective channel protein 1	Vdac1	3920000000	2.55174
E0CYB9;Q6PCP5;E0CYI3;Q6PCP5-3;Q6PCP5-4;F7CTF8	E0CYB9;Q6PCP5;E0CYI3;Q6PCP5-3;Q6PCP5-4;F7CTF8	Mitochondrial fission factor	Mff	22900000	1.40932
Q8K2Y9;Q8K2Y9-2;F7AVU1;F8WJD3;E0CXR5;E0CZ84	Q8K2Y9;Q8K2Y9-2;F7AVU1;F8WJD3	Malcavernin	Ccm2	153760	0.138053
Q64435;Q8R0P3	Q64435;Q8R0P3	UDP-glucuronosyltransferase 1-6	Ugt1a6;Ugt1a6a	154170	NaN
F6WMJ3;Q8K4I3	F6WMJ3;Q8K4I3	Rho guanine nucleotide exchange factor 6	Arhgef6	0	NaN
Q9ERR1;Q9ERR1-2	Q9ERR1;Q9ERR1-2	Nuclear distribution protein nudE-like 1	Ndel1	756930	NaN
Q8BVQ5	Q8BVQ5	Protein phosphatase methylesterase 1	Ppme1	3803900	0.270475
A2RTT4;P61089;G5E8Z0	A2RTT4;P61089	Ubiquitin-conjugating enzyme E2 N	Ube2n	311000000	0.859771
P12382	P12382	6-phosphofructokinase, liver type	Pfkl	7999100	0.200144
Q5SQB7;Q61937;Q5SQB5;Q5SQB0;Q9DAY9;E9Q5T3	Q5SQB7;Q61937;Q5SQB5;Q5SQB0;Q9DAY9;E9Q5T3	Nucleophosmin	Npm1;Gm5611	93700000	0.344483
Q5HZH8;Q9Z1B5	Q5HZH8;Q9Z1B5	Mitotic spindle assembly checkpoint protein MAD2A	Mad2l1	276890	NaN
Q9D7L8;E9PYC7	Q9D7L8;E9PYC7	Transmembrane and immunoglobulin domain-containing protein 1	Tmigd1	346000000	0.372453
O88271	O88271	Craniofacial development protein 1	Cfdp1	9092600	0.468867
Q8VEJ9	Q8VEJ9	Vacuolar protein sorting-associated protein 4A	Vps4a	3525000	0.528681
Q99M46;E9Q898;P97760	Q99M46;E9Q898;P97760	DNA-directed RNA polymerase II subunit RPB3	Polr2c	1486300	1.50157
A3KGB1;P61759;Q3TIR6	A3KGB1;P61759;Q3TIR6	Prefoldin subunit 3	Vbp1	15500000	1.08527
Q61768;E9QAK5	Q61768;E9QAK5	Kinesin-1 heavy chain	Kif5b	46800000	0.342454
O35887;Q3TUF3;G3UWR0;G3UWV3;G3UY49	O35887;Q3TUF3;G3UWR0;G3UWV3;G3UY49	Calumenin	Calu	489000000	2.07572
E9QAU4;A2AQ25;A2AQ25-2;A2AQ25-3;D3Z781;A2AQ25-4;A2AQ25-8;A2AQ25-5;F8WHU1;A2AQ25-6;A2AQ25-9;Q8BHR1;A2AQ25-7;B1AY49	E9QAU4;A2AQ25;A2AQ25-2;A2AQ25-3;D3Z781;A2AQ25-4;A2AQ25-8;A2AQ25-5;F8WHU1;A2AQ25-6;A2AQ25-9	Sickle tail protein	Etl4;Skt	827970	NaN
G5E881;Q3TUH1;G3UYJ1;Q3TUH1-2;G3UWL8;D6RGT1	G5E881;Q3TUH1;G3UYJ1	Mitochondrial translocator assembly and maintenance protein 41 homolog	1500001M20Rik;Tamm41	279660	NaN
Q08122-4;Q08122;Q08122-2;E0CXS9;F8WIE2;E0CXS2;E0CY14;E0CXU1;Q3TY99;F6TS96;F7D0C4;E0CY76;E0CYM5;F6YM15	Q08122-4;Q08122;Q08122-2;E0CXS9;F8WIE2;E0CXS2;E0CY14;E0CXU1;Q3TY99;F6TS96	Transducin-like enhancer protein 3	Tle3	212230	0.130991
Q9CT10	Q9CT10	Ran-binding protein 3	Ranbp3	6217200	0.388606
Q9JIL4;D3YZS9;D3YW13;D3Z114	Q9JIL4	Na(+)/H(+) exchange regulatory cofactor NHE-RF3	Pdzk1	46800000	0.0926784
P01635	P01635	Ig kappa chain V-V region K2		1649100	1.00777
Q20BD0;Q80XR6;Q544Z3;Q99020;Q9D6G1	Q20BD0;Q80XR6;Q544Z3;Q99020;Q9D6G1	Heterogeneous nuclear ribonucleoprotein A/B	Hnrnpab	75500000	0.323447
D3Z5F7;G3UY42;Q8CCS6;Q8CCS6-2;D3YUB9;G3UWS5;D3Z055	D3Z5F7;G3UY42;Q8CCS6;Q8CCS6-2;D3YUB9;G3UWS5;D3Z055	Polyadenylate-binding protein 2	Gm20521;Pabpn1	25900000	1.12997
P70268-2;P70268;D6RH37	P70268-2;P70268;D6RH37	Serine/threonine-protein kinase N1	Pkn1	207690	NaN
Q64522	Q64522	Histone H2A type 2-B	Hist2h2ab	21200000	0.976849
Q9EPC1;Q3UF75	Q9EPC1;Q3UF75	Alpha-parvin	Parva	11500000	0.382731
B1AV55;Q8R059	B1AV55;Q8R059	UDP-glucose 4-epimerase	Gale	8088400	0.436758
Q9CRB9;E9Q4H4;Q9D9P1;E9Q1D3;F6QFL0	Q9CRB9;E9Q4H4;Q9D9P1	Coiled-coil-helix-coiled-coil-helix domain-containing protein 3, mitochondrial	Chchd3	2010000000	7.57805
Q8BMP6	Q8BMP6	Golgi resident protein GCP60	Acbd3	6574200	0.227283
O70200;Q4FJL9;G3UYJ2;Q9EQW9	O70200;Q4FJL9;G3UYJ2;Q9EQW9	Allograft inflammatory factor 1	Aif1	0	NaN
Q04857;E9Q7R6;E9Q3C7	Q04857;E9Q7R6	Collagen alpha-1(VI) chain	Col6a1	39100000	0.888494
Q9CYA6	Q9CYA6	Zinc finger CCHC domain-containing protein 8	Zcchc8	0	NaN
Q02614	Q02614	SAP30-binding protein	Sap30bp	404290	NaN
E9QLZ1;P62500;D3Z0V7;P62500-3;P62500-2;Q3UXU0;D3YW86;H3BLI9;Q9EQN3;E9Q1N9;F6VXN4	E9QLZ1;P62500;D3Z0V7;P62500-3;P62500-2;Q3UXU0;D3YW86	TSC22 domain family protein 1	Tsc22d1	17600000	1.18739
Q6PIU9	Q6PIU9	Uncharacterized protein FLJ45252 homolog		337640	NaN
E9PWQ3;F6XLB2;F6R0L1	E9PWQ3		Col6a3	142000000	0.772798
A2A895;P63024;B0QZN5;P63044;Q8CHR4;F6Q6A5	A2A895;P63024;B0QZN5;P63044;Q8CHR4;F6Q6A5	Vesicle-associated membrane protein 3;Vesicle-associated membrane protein 2	Vamp3;Vamp2	13400000	0.373455
B2RTB0;Q3UHX2	B2RTB0;Q3UHX2	28 kDa heat- and acid-stable phosphoprotein	Pdap1	118000000	0.919625
Q8BG73;E9Q5U7;G5E8J5	Q8BG73;E9Q5U7	SH3 domain-binding glutamic acid-rich-like protein 2	Sh3bgrl2	5516000	0.222896
Q3UMM1;Q922F4	Q3UMM1;Q922F4	Tubulin beta-6 chain	Tubb6	5015800	0.334997
B9EJX8;Q9D0W5	B9EJX8;Q9D0W5	Peptidyl-prolyl cis-trans isomerase;Peptidyl-prolyl cis-trans isomerase-like 1	Ppil1	31300000	0.728014
A2AJA8;Q9DAK9	A2AJA8;Q9DAK9	14 kDa phosphohistidine phosphatase	Phpt1	332000000	2.23254
Q8BVF2	Q8BVF2	Phosducin-like protein 3	Pdcl3	8743500	0.726322
Q8BGZ4;G3X8W7;Q8BGZ4-2	Q8BGZ4;G3X8W7;Q8BGZ4-2	Cell division cycle protein 23 homolog	Cdc23	2025200	0.132966
Q9DCS9;D3YUK4	Q9DCS9;D3YUK4	NADH dehydrogenase [ubiquinone] 1 beta subcomplex subunit 10	Ndufb10	1900000000	5.0035
Q9JHH9;F2Z4A2	Q9JHH9	Coatomer subunit zeta-2	Copz2	1767200	NaN
Q9D0T1;E9PZS4	Q9D0T1;E9PZS4	NHP2-like protein 1	Nhp2l1	6123300	0.318563
P56677;Q543E3	P56677;Q543E3	Suppressor of tumorigenicity 14 protein homolog	St14	0	NaN
A2A9F5;O35685	A2A9F5;O35685	Nuclear migration protein nudC	Nudc	140000000	0.969462
Q5SUR0;G3UY86	Q5SUR0	Phosphoribosylformylglycinamidine synthase	Pfas	1822500	0.264501
Q62192	Q62192	CD180 antigen	Cd180	220390	0.12113
B1AXB8;Q6NVE8;Q6NVE8-2	B1AXB8;Q6NVE8;Q6NVE8-2	WD repeat-containing protein 44	Wdr44	6814200	0.310039
Q564E5;Q9WUK2;Q80U88;Q9WUK2-2	Q564E5;Q9WUK2;Q80U88;Q9WUK2-2	Eukaryotic translation initiation factor 4H	Eif4h	51600000	0.860067
Q8WTY4;E0CYY1;F7BWP1;F8WIK0	Q8WTY4;E0CYY1	Anamorsin	Ciapin1	15800000	0.983671
Q7TQI3;D3YWF6;D3Z7K0	Q7TQI3;D3YWF6	Ubiquitin thioesterase OTUB1	Otub1	63600000	0.612783
O35452;E9Q2T3;E9Q1J9	O35452;E9Q2T3;E9Q1J9		Tnxb	35100000	0.87558
B9EIE8;Q9DA03	B9EIE8;Q9DA03	LYR motif-containing protein 7	Lyrm7	5149100	5.27398
Q9DCT2	Q9DCT2	NADH dehydrogenase [ubiquinone] iron-sulfur protein 3, mitochondrial	Ndufs3	516000000	3.38021
P60766;Q3UL78;Q8R527;Q9ER71;Q9ER71-2;D3YX61;F2Z463;D3Z3L1;G3UZM2	P60766;Q3UL78	Cell division control protein 42 homolog	Cdc42	14100000	0.323311
Q4G0C5;Q9D868-2;A2BGI8;A2BGJ0;Q9D868;A2BGI9	Q4G0C5;Q9D868-2;A2BGI8;A2BGJ0;Q9D868;A2BGI9	Peptidyl-prolyl cis-trans isomerase;Peptidyl-prolyl cis-trans isomerase H	Ppih	6493500	0.378086
A2BH28;Q9Z1F9;H3BJQ2	A2BH28;Q9Z1F9	SUMO-activating enzyme subunit 2	Uba2	20400000	0.318674
P45377	P45377	Aldose reductase-related protein 2	Akr1b8	23300000	0.316136
O55222;F6Q5Z1;D3YZA5	O55222;F6Q5Z1	Integrin-linked protein kinase	Ilk	11000000	0.354673
Q922Q8;Q3TF84	Q922Q8;Q3TF84	Leucine-rich repeat-containing protein 59	Lrrc59	4036700	0.284917
Q9QZH3	Q9QZH3	Peptidyl-prolyl cis-trans isomerase E	Ppie	0	NaN
Q8K019;Q8K019-2;H7BX81;Q8K019-3;E9Q5V0	Q8K019;Q8K019-2;H7BX81;Q8K019-3	Bcl-2-associated transcription factor 1	Bclaf1	7651300	0.336101
G3X8U4;Q91XA2	G3X8U4;Q91XA2	Golgi membrane protein 1	Golm1	4494100	0.258779
Q61391;Q8BNU9	Q61391	Neprilysin	Mme	124960	NaN
H3BJW3;H3BJ30;Q6NVF9;H3BKW0;H3BLM9	H3BJW3;H3BJ30;Q6NVF9	Cleavage and polyadenylation specificity factor subunit 6	Cpsf6	2120400	0.257792
P46638;Q78ZJ8;P62492;Q0PD45;G3UZD3;E9Q3P9;F8WGS1;G3UY29;G3UZL4;F6R2Z5;E9Q6B3;E9PZB2	P46638;Q78ZJ8;P62492;Q0PD45;G3UZD3;E9Q3P9;F8WGS1;G3UY29;G3UZL4	Ras-related protein Rab-11B;Ras-related protein Rab-11A	Rab11b;Rab11a	166000000	0.732279
Q3TLI0;F8VQF9	Q3TLI0;F8VQF9	Trafficking protein particle complex subunit 10	Trappc10	116620	NaN
Q3UMJ4;Q8R0A0	Q3UMJ4;Q8R0A0	General transcription factor IIF subunit 2	Gtf2f2	1891700	0.321947
E9PVX3;Q99M28;Q99M28-2	E9PVX3;Q99M28;Q99M28-2	RNA-binding protein with serine-rich domain 1	Rnps1	8854000	0.429756
Q3TAI4;A2AUD5;A2AUD6;Q9CYZ2	Q3TAI4;A2AUD5;A2AUD6;Q9CYZ2	Tumor protein D54	Tpd52l2	144000000	1.53137
O88569;F6U106;O88569-2;O88569-3	O88569;F6U106;O88569-2;O88569-3	Heterogeneous nuclear ribonucleoproteins A2/B1	Hnrnpa2b1	935000000	0.451121
Q8CAQ8-2;E9QAY3;E9Q800;E9QAY6;Q8CAQ8-4;E9Q0J9	Q8CAQ8-2;E9QAY3;E9Q800;E9QAY6		Immt	2890000000	2.70783
P62307;Q497K3	P62307;Q497K3	Small nuclear ribonucleoprotein F	Snrpf	1358600	0.353232
Q3TRJ7;Q62419	Q3TRJ7;Q62419	Endophilin-A2	Sh3gl1	2962800	0.261015
E9QQ10;F6V1W5;H3BLL7	E9QQ10		Akap9	1527900	NaN
Q8BTS4	Q8BTS4	Nuclear pore complex protein Nup54	Nup54	7638300	0.593437
P62774	P62774	Myotrophin	Mtpn	32100000	0.407166
Q8BWR8	Q8BWR8	Rhophilin-2	Rhpn2	391010	NaN
Q61107	Q61107	Guanylate-binding protein 4	Gbp4	98372	NaN
Q9JIH2	Q9JIH2	Nuclear pore complex protein Nup50	Nup50	557480	NaN
P09405	P09405	Nucleolin	Ncl	174000000	0.400593
Q8C0E2;Q8C0E2-2	Q8C0E2;Q8C0E2-2	Vacuolar protein sorting-associated protein 26B	Vps26b	3817300	0.546956
Q8K2A7;E9Q361;E9Q360;E9Q315	Q8K2A7;E9Q361;E9Q360;E9Q315	Integrator complex subunit 10	Ints10	54414	NaN
Q6P5D8	Q6P5D8	Structural maintenance of chromosomes flexible hinge domain-containing protein 1	Smchd1	0	NaN
Q9CPR1	Q9CPR1	RWD domain-containing protein 4	Rwdd4	6992000	1.53884
Q9D8W7	Q9D8W7	OCIA domain-containing protein 2	Ociad2	1476300	0.264438
Q02788;D3Z7D5	Q02788;D3Z7D5	Collagen alpha-2(VI) chain	Col6a2	39900000	0.799936
Q14A95;Q9CQT2	Q14A95;Q9CQT2	RNA-binding protein 7	Rbm7	0	NaN
Q3V2H3;Q3TGS7;Q6ZWQ5;O70493	Q3V2H3;Q3TGS7;Q6ZWQ5;O70493	Sorting nexin-12	Snx12	14700000	0.526537
A2ARQ8;Q9CQU1	A2ARQ8;Q9CQU1	Microfibrillar-associated protein 1	Mfap1b;Mfap1	4478200	0.480008
Q8VHR5;Q8VHR5-2	Q8VHR5;Q8VHR5-2	Transcriptional repressor p66-beta	Gatad2b	318780	NaN
Q9CQY9	Q9CQY9	NADH dehydrogenase [ubiquinone] 1 subunit C1, mitochondrial	Ndufc1	101000000	5.66958
A2ADR9;Q8R3G1;A2ADR8	A2ADR9;Q8R3G1;A2ADR8	Nuclear inhibitor of protein phosphatase 1	Ppp1r8	2661500	0.421799
P63330	P63330	Serine/threonine-protein phosphatase 2A catalytic subunit alpha isoform	Ppp2ca	2174700	NaN
Q8BYN3	Q8BYN3	Inositol-tetrakisphosphate 1-kinase	Itpk1	187330	NaN
P57759;D6RG87;F8WIM7;F8WJI4	P57759	Endoplasmic reticulum resident protein 29	Erp29	69200000	0.650533
P21279;Q3UHH5	P21279;Q3UHH5	Guanine nucleotide-binding protein G(q) subunit alpha	Gnaq	4569300	0.201984
Q99KG3;Q99KG3-3;F8WGU1;Q99KG3-2	Q99KG3;Q99KG3-3;F8WGU1;Q99KG3-2	RNA-binding protein 10	Rbm10	3407800	0.710379
Q3TYA4;Q8R3T5;B8JJ84;D6RJ81	Q3TYA4;Q8R3T5	Syntaxin-binding protein 6	Stxbp6	216360	NaN
Q9QXD8	Q9QXD8	LIM domain-containing protein 1	Limd1	3341500	0.33911
Q6PE01;Q3UFK4	Q6PE01	U5 small nuclear ribonucleoprotein 40 kDa protein	Snrnp40	4818500	0.171647
Q3UG25;Q9WTK5;E9Q1H6	Q3UG25;Q9WTK5;E9Q1H6	Nuclear factor NF-kappa-B p100 subunit;Nuclear factor NF-kappa-B p52 subunit	Nfkb2	157090	NaN
P50462;Q545C7	P50462;Q545C7	Cysteine and glycine-rich protein 3	Csrp3	2610000000	26.0268
Q923D5;H7BWZ5	Q923D5;H7BWZ5	WW domain-binding protein 11	Wbp11	5561200	0.618506
Q4VAA2;Q4VAA2-2;F8WGL9	Q4VAA2;Q4VAA2-2	Protein CDV3	Cdv3	23700000	1.2102
Q61233;D3Z311;D3Z7D9;D3YVW8;D3YZ25	Q61233	Plastin-2	Lcp1	42100000	0.107481
Q9D0B0;F6RTE1	Q9D0B0	Serine/arginine-rich splicing factor 9	Srsf9	1311800	0.327407
P11835;Q542I8;D3YYP8	P11835;Q542I8	Integrin beta-2;Integrin beta	Itgb2	387280	0.102455
O54890	O54890	Integrin beta-3	Itgb3	0	NaN
Q60668;Q60668-3;G3X9W0;Q60668-2;G5E8G0;Q60668-4;F6ZV59;F6SHF3;E9Q5B6;F7A465	Q60668;Q60668-3;G3X9W0;Q60668-2;G5E8G0;Q60668-4;F6ZV59;F6SHF3;E9Q5B6	Heterogeneous nuclear ribonucleoprotein D0	Hnrnpd	99800000	0.541565
Q3TXT7;Q9WTM5;D3YXQ8	Q3TXT7;Q9WTM5	RuvB-like 2	Ruvbl2	23300000	0.596516
P97429;D3Z0S1;E9Q073	P97429;D3Z0S1	Annexin A4;Annexin	Anxa4	79200000	0.301332
O08529;E9PWN1	O08529;E9PWN1	Calpain-2 catalytic subunit	Capn2	36100000	0.334784
Q9EPK2-2;B1B076;Q9EPK2;Q9EPK2-3;B1B077;Q9EPK2-4	Q9EPK2-2;B1B076;Q9EPK2;Q9EPK2-3;B1B077;Q9EPK2-4	Protein XRP2	Rp2h;Rp2	399120	0.159003
F8WI94;O55143	F8WI94;O55143	Sarcoplasmic/endoplasmic reticulum calcium ATPase 2	Atp2a2	829000000	8.64603
P63166	P63166	Small ubiquitin-related modifier 1	Sumo1	594270	NaN
Q8R048;A2A7K5;Q9EQS3	Q8R048;A2A7K5;Q9EQS3	C-Myc-binding protein	Mycbp	27400000	1.17982
E9Q3Y4;E9QK10;Q9ESE1;Q9ESE1-2;Q9ESE1-3;Q8BSM6	E9Q3Y4;E9QK10;Q9ESE1;Q9ESE1-2;Q9ESE1-3	Lipopolysaccharide-responsive and beige-like anchor protein	Lrba	3512900	0.320996
Q9CQF4;D3Z316	Q9CQF4;D3Z316	Uncharacterized protein C6orf203 homolog	1700021F05Rik	74600000	7.9384
Q9ERB0	Q9ERB0	Synaptosomal-associated protein 29	Snap29	21900000	0.811162
Q8VDN2;E9QAV3	Q8VDN2;E9QAV3	Sodium/potassium-transporting ATPase subunit alpha-1	Atp1a1	175000000	0.443656
Q3TI84;Q8R349	Q3TI84;Q8R349	Cell division cycle protein 16 homolog	Cdc16	1056100	0.146005
E9PUF2;F6YMR0;H3BJW9;H3BKJ0;H3BL90	E9PUF2;F6YMR0		Dlgap4	16300000	0.417659
Q9CQ92;G3X9U9;D3YZ32	Q9CQ92;G3X9U9	Mitochondrial fission 1 protein	Fis1	197000000	2.09166
A3KFW2;Q99JR5;H3BJ97;Q4FJX7	A3KFW2;Q99JR5;H3BJ97;Q4FJX7	Tubulointerstitial nephritis antigen-like	Tinagl1	10000000	0.654965
Q5FWJ9;Q63850;E9PUX9;G3UZB1	Q5FWJ9;Q63850;E9PUX9	Nuclear pore glycoprotein p62	Nup62	15500000	0.698178
A2ABW5;Q8BX94	A2ABW5;Q8BX94	Oxysterol-binding protein;Oxysterol-binding protein-related protein 2	Osbpl2	0	NaN
Q543N3;Q61792;A2A6H0;A2A6G9;A2A6G8;A2A6G7;A2A6G6;A2A6G5;A2A6G4;A2A6G0	Q543N3;Q61792;A2A6H0;A2A6G9;A2A6G8;A2A6G7;A2A6G6	LIM and SH3 domain protein 1	Lasp1	84500000	0.350668
G5E924;E9Q8W8;Q8R081;G3UY38;G3UY56;G3UYY3	G5E924;E9Q8W8;Q8R081;G3UY38	Heterogeneous nuclear ribonucleoprotein L	Hnrnpl	67900000	0.238129
Q91W67	Q91W67	Ubiquitin-like protein 7	Ubl7	0	NaN
Q91WE1;D3Z479;D3YVT2	Q91WE1;D3Z479;D3YVT2	Sorting nexin-15	Snx15	1852600	0.635042
P82343;P82343-2;D6RHA2;G3XA46	P82343;P82343-2;D6RHA2;G3XA46	N-acylglucosamine 2-epimerase	Renbp	831430	NaN
F8VPM4;Q00PI9	F8VPM4;Q00PI9	Heterogeneous nuclear ribonucleoprotein U-like protein 2	Hnrnpul2	16700000	0.255376
Q61112;Q61112-2	Q61112;Q61112-2	45 kDa calcium-binding protein	Sdf4	17700000	0.548336
B1AUX2;Q61191;F6SJS2	B1AUX2;Q61191	Host cell factor 1;HCF N-terminal chain 1;HCF N-terminal chain 2;HCF N-terminal chain 3;HCF N-terminal chain 4;HCF N-terminal chain 5;HCF N-terminal chain 6;HCF C-terminal chain 1;HCF C-terminal chain 2;HCF C-terminal chain 3;HCF C-terminal chain 4;HCF C-terminal chain 5;HCF C-terminal chain 6	Hcfc1	57600000	0.702445
Q8C0T5;Q8C0T5-2;Q4VBF8;Q3TAF4	Q8C0T5;Q8C0T5-2;Q4VBF8	Signal-induced proliferation-associated 1-like protein 1	Sipa1l1	0	NaN
Q8BTX9	Q8BTX9	Inactive hydroxysteroid dehydrogenase-like protein 1	Hsdl1	281940	0.216591
Q9CPQ3	Q9CPQ3	Mitochondrial import receptor subunit TOM22 homolog	Tomm22	20900000	1.56669
Q8BKC5;Q8BKC5-2;E9PVZ5	Q8BKC5;Q8BKC5-2;E9PVZ5	Importin-5	Ipo5	60400000	0.338375
Q9CXY6	Q9CXY6	Interleukin enhancer-binding factor 2	Ilf2	4142100	0.182612
G3UWG1;P62897;Q56A15;G3UW49	G3UWG1;P62897;Q56A15;G3UW49	Cytochrome c, somatic	Gm10108;Cycs;Gm10121	3550000000	3.26893
Q91X20;E9PU93;D3YYA0;D6RI55;D6RET1	Q91X20;E9PU93;D3YYA0	Set1/Ash2 histone methyltransferase complex subunit ASH2	Ash2l	218000	NaN
B2RTE3;Q4FK66	B2RTE3;Q4FK66	Pre-mRNA-splicing factor 38A	Prpf38a	0	NaN
B1AUN1;Q8BH43;E9PWN7;B1AUN0	B1AUN1;Q8BH43;E9PWN7	Wiskott-Aldrich syndrome protein family member 2	Wasf2	3882000	0.299724
Q9CRC6	Q9CRC6	UPF0693 protein C10orf32 homolog		3272300	1.28627
Q8R332;Q8R332-2;Q8R332-3;Q8R332-4	Q8R332;Q8R332-2;Q8R332-3;Q8R332-4	Nucleoporin p58/p45	Nupl1	1662600	0.460872
Q61160	Q61160	Protein FADD	Fadd	16600000	2.14234
H3BLL2;Q811I0;H3BL30;H3BJP9;H3BK16;H3BLD0;H3BKR0	H3BLL2;Q811I0;H3BL30;H3BJP9;H3BK16;H3BLD0	ATP synthase mitochondrial F1 complex assembly factor 1	Atpaf1	28700000	2.67008
Q3TCX3;Q3TCX3-2;Q3TCX3-3	Q3TCX3;Q3TCX3-2;Q3TCX3-3	UPF0469 protein KIAA0907	Kiaa0907	327740	0.194689
Q9CQ75	Q9CQ75	NADH dehydrogenase [ubiquinone] 1 alpha subcomplex subunit 2	Ndufa2	547000000	3.09972
O88845;O88845-3;O88845-2;Q3TR91	O88845;O88845-3;O88845-2	A-kinase anchor protein 10, mitochondrial	Akap10	32386	NaN
Q9DB82;A8Y5L1;P61600;E9PXA4;E9Q023	Q9DB82;A8Y5L1;P61600;E9PXA4	N-alpha-acetyltransferase 20	Naa20	1125600	NaN
Q9Z1N5;G3UXI6	Q9Z1N5	Spliceosome RNA helicase Ddx39b	Ddx39b	29000000	0.235682
A2AHI4;Q9CS42	A2AHI4;Q9CS42	Ribose-phosphate pyrophosphokinase;Ribose-phosphate pyrophosphokinase 2	Prps2	141060	NaN
Q9DBP5;D6RIL5;F6TY56	Q9DBP5	UMP-CMP kinase	Cmpk1	184000000	0.3353
Q9Z2X1;Q9Z2X1-2	Q9Z2X1;Q9Z2X1-2	Heterogeneous nuclear ribonucleoprotein F;Heterogeneous nuclear ribonucleoprotein F, N-terminally processed	Hnrnpf	136000000	0.339282
G5E814;Q9D8B4	G5E814;Q9D8B4	NADH dehydrogenase [ubiquinone] 1 alpha subcomplex subunit 11	Ndufa11	429000000	2.05292
Q569N0;Q9CR21;F8WJ64;F6ZFT1	Q569N0;Q9CR21;F8WJ64;F6ZFT1	Acyl carrier protein;Acyl carrier protein, mitochondrial	Ndufab1	997000000	3.24181
Q9CQZ5	Q9CQZ5	NADH dehydrogenase [ubiquinone] 1 alpha subcomplex subunit 6	Ndufa6	1470000000	5.69573
B2RXM7;Q9D1J3	B2RXM7;Q9D1J3	SAP domain-containing ribonucleoprotein	Sarnp	32100000	0.923276
P10711;Q3UWX7;E9PYD5;P10711-2	P10711;Q3UWX7;E9PYD5;P10711-2	Transcription elongation factor A protein 1	Tcea1	14700000	0.465853
G3X924;Q91VC4	G3X924;Q91VC4	Plasmalemma vesicle-associated protein	Plvap	1890600	0.22144
P21278;Q3UPA1;P30677	P21278;Q3UPA1	Guanine nucleotide-binding protein subunit alpha-11	Gna11	3329500	0.146739
Q9ESP1	Q9ESP1	Stromal cell-derived factor 2-like protein 1	Sdf2l1	6282500	0.33389
F6XUP5;P61961;D3YW97;H7BWZ1	F6XUP5;P61961;D3YW97;H7BWZ1	Ubiquitin-fold modifier 1	Ufm1	41100000	0.543803
F6SY09;P55302;Q52KI7;F6WMD1	F6SY09;P55302;Q52KI7	Alpha-2-macroglobulin receptor-associated protein	Lrpap1	158000000	1.34481
F8VQ05;F6SDM9	F8VQ05		Fryl	1562200	NaN
Q059U9;Q9DBR0	Q059U9;Q9DBR0	A-kinase anchor protein 8	Akap8	915990	0.295281
Q8BH79-4;Q8BH79;Q8BH79-2;Q8BH79-3	Q8BH79-4;Q8BH79;Q8BH79-2;Q8BH79-3	Anoctamin-10	Ano10	0	NaN
Q9CQ91;D3Z670	Q9CQ91;D3Z670	NADH dehydrogenase [ubiquinone] 1 alpha subcomplex subunit 3	Ndufa3	359000000	6.01649
P62715	P62715	Serine/threonine-protein phosphatase 2A catalytic subunit beta isoform	Ppp2cb	1092400	NaN
P17742;Q5SVY2;E9Q1E3;F8VPN3	P17742;Q5SVY2;E9Q1E3	Peptidyl-prolyl cis-trans isomerase A;Peptidyl-prolyl cis-trans isomerase	Ppia;Gm9234	734000000	0.355682
Q9CQF3	Q9CQF3	Cleavage and polyadenylation specificity factor subunit 5	Nudt21	13400000	0.49186
G3X920;Q9DBR3;Q9DBR3-2;Q9DBR3-3	G3X920;Q9DBR3;Q9DBR3-2;Q9DBR3-3	Armadillo repeat-containing protein 8	Armc8	386090	0.151561
Q8VIJ6	Q8VIJ6	Splicing factor, proline- and glutamine-rich	Sfpq	51200000	0.535217
Q3UI84;Q99J62;D6RGM1	Q3UI84;Q99J62	Replication factor C subunit 4	Rfc4	514920	0.181363
Q91VK1	Q91VK1	Basic leucine zipper and W2 domain-containing protein 2	Bzw2	34600000	0.333879
Q9Z1B3;Q9Z1B3-3;A2AW58;Q9Z1B3-2;Q6ZQ92;F6X322	Q9Z1B3;Q9Z1B3-3;A2AW58;Q9Z1B3-2;Q6ZQ92	1-phosphatidylinositol 4,5-bisphosphate phosphodiesterase beta-1	Plcb1	146290	0.166951
H3BJQ7;P99029;E9Q9H9;P99029-2;G3UZJ4	H3BJQ7;P99029;E9Q9H9;P99029-2;G3UZJ4	Peroxiredoxin-5, mitochondrial	Prdx5	1990000000	1.37823
Q8VEH3;F6QKK2	Q8VEH3;F6QKK2	ADP-ribosylation factor-like protein 8A	Arl8a	2649200	0.176022
Q99LC3	Q99LC3	NADH dehydrogenase [ubiquinone] 1 alpha subcomplex subunit 10, mitochondrial	Ndufa10	1560000000	2.84957
A2A9P5;P24788;A2A9P6;P24788-2	A2A9P5;P24788;A2A9P6;P24788-2	Cyclin-dependent kinase 11B	Cdk11b	2141900	0.188576
Q9Z1A1;Q9D828;Q8C2C6;B8JJG6;B8JJG8;B8JJG7;F6QJV5;B8JJG9;B8JJG3	Q9Z1A1;Q9D828;Q8C2C6;B8JJG6;B8JJG8;B8JJG7;F6QJV5;B8JJG9		Tfg	49500000	0.698959
G5E8K5;G5E8K3;G5E8K2;G5E8C5;G3X971;G3X9A5	G5E8K5;G5E8K3;G5E8K2;G5E8C5;G3X971		Ank3	31800000	0.366865
Q543P7;Q9WUL7	Q543P7;Q9WUL7	ADP-ribosylation factor-like protein 3	Arl3	12900000	0.613987
P08249	P08249	Malate dehydrogenase, mitochondrial	Mdh2	5290000000	1.9978
E9QAQ5;Q5KU03;Q9WV60	E9QAQ5;Q5KU03;Q9WV60	Glycogen synthase kinase-3 beta	Gsk3b	1497900	0.286936
Q52KC3;P49718	Q52KC3;P49718	DNA replication licensing factor MCM5	Mcm5	1634000	NaN
Q9Z0S1;D3Z0E6;D3Z5X0	Q9Z0S1;D3Z0E6	3(2),5-bisphosphate nucleotidase 1	Bpnt1	64000000	0.287348
F8WGL8;Q08943-2;A2AW06;Q08943;A2AW05	F8WGL8;Q08943-2;A2AW06;Q08943;A2AW05	FACT complex subunit SSRP1	Ssrp1	9743100	0.169756
Q9D7H3;D3Z263	Q9D7H3;D3Z263	RNA 3-terminal phosphate cyclase	Rtcd1	1452700	0.443439
P54726;Q8CAP3;Q3TN85;Q8BRA9	P54726;Q8CAP3;Q3TN85;Q8BRA9	UV excision repair protein RAD23 homolog A	Rad23a	137000000	1.20256
Q62159;H3BL56	Q62159;H3BL56	Rho-related GTP-binding protein RhoC	Rhoc	13300000	0.321906
B8JJA8;E9Q463;P17665	B8JJA8;E9Q463;P17665	Cytochrome c oxidase subunit 7C, mitochondrial	Cox7c;Gm3386	401000000	3.51531
Q3UDC3;O88746;Q561M4	Q3UDC3;O88746;Q561M4	Target of Myb protein 1	Tom1	9082400	2.18498
Q76MZ3;G3UWL2;G3UXQ1	Q76MZ3	Serine/threonine-protein phosphatase 2A 65 kDa regulatory subunit A alpha isoform	Ppp2r1a	263000000	0.395898
Q3UEB3;Q3UEB3-2;Q3UEB3-3	Q3UEB3;Q3UEB3-2;Q3UEB3-3	Poly(U)-binding-splicing factor PUF60	Puf60	13400000	0.285258
Q60953;Q60953-2;D3YXR5;D3Z3A6;F7BTZ2;D3Z2V0;D6RII9	Q60953;Q60953-2;D3YXR5;D3Z3A6;F7BTZ2	Protein PML	Pml	3640400	0.270636
A2AEQ7;P70303;A2AEQ8;P70303-2;A2AEQ6;P70303-3;A2AEQ5	A2AEQ7;P70303;A2AEQ8;P70303-2;A2AEQ6;P70303-3	CTP synthase 2	Ctps2	560020	0.134829
Q8BY89;Q8BY89-2	Q8BY89;Q8BY89-2	Choline transporter-like protein 2	Slc44a2	48584	0.151
P14901;Q3U5U6;E9Q8W7;H3BKP1	P14901;Q3U5U6;E9Q8W7	Heme oxygenase 1	Hmox1	201340	0.206003
Q8K2I3;D3YVR1	Q8K2I3	Dimethylaniline monooxygenase [N-oxide-forming] 2	Fmo2	1459700	0.170471
O09164;Q542X9	O09164;Q542X9	Extracellular superoxide dismutase [Cu-Zn];Superoxide dismutase [Cu-Zn]	Sod3	17800000	1.30252
P99027;G3UW69	P99027;G3UW69	60S acidic ribosomal protein P2	Rplp2;Rplp2-ps1	402000000	0.539229
Q9JME7	Q9JME7	Trafficking protein particle complex subunit 2-like protein	Trappc2l	5167600	0.44833
Q9CX34	Q9CX34	Suppressor of G2 allele of SKP1 homolog	Sugt1	51700000	0.81057
P05132;P05132-2	P05132;P05132-2	cAMP-dependent protein kinase catalytic subunit alpha	Prkaca	13300000	0.293798
A2ACD3;Q9CWL8	A2ACD3;Q9CWL8	Beta-catenin-like protein 1	Ctnnbl1	784480	0.120626
Q543N5;Q9QYB1	Q543N5;Q9QYB1	Chloride intracellular channel protein 4	Clic4	77100000	0.410914
Q91VW5;E9Q5J7;F6V6W2	Q91VW5	Golgin subfamily A member 4	Golga4	7464400	0.304257
A2RSV8;P19783	A2RSV8;P19783	Cytochrome c oxidase subunit 4 isoform 1, mitochondrial	Cox4i1	3950000000	4.5498
Q5SX39;Q3UUB1	Q5SX39	Myosin-4	Myh4	779000000	0.457624
O54916;E9Q632;D3Z2E3;F6R6F1;O54916-4;O54916-3;F7AB82;F6YT69;O54916-2;D6RIN6	O54916;E9Q632;D3Z2E3;F6R6F1;O54916-4;O54916-3;F7AB82;F6YT69;O54916-2	RalBP1-associated Eps domain-containing protein 1	Reps1	1618200	0.320883
P42669	P42669	Transcriptional activator protein Pur-alpha	Pura	116000000	0.979912
Q9EQQ9-3;Q9EQQ9;Q9EQQ9-2	Q9EQQ9-3;Q9EQQ9	Bifunctional protein NCOAT;Protein O-GlcNAcase;Histone acetyltransferase	Mgea5	200490	0.275976
E9QLL2;Q8BZ98;Q8BZ98-2;E9PWS1;E0CXZ8;F2Z460	E9QLL2;Q8BZ98;Q8BZ98-2;E9PWS1	Dynamin-3	Dnm3	1302800	0.23499
Q61171;D3Z4A4	Q61171;D3Z4A4	Peroxiredoxin-2	Prdx2	891000000	2.09187
Q9CXD6;Q9CXD6-3;Q9CXD6-2	Q9CXD6;Q9CXD6-3;Q9CXD6-2	Coiled-coil domain-containing protein 90A, mitochondrial	Ccdc90a	3989300	0.621041
O88811;Q3TGH8;O88811-2;B0R0N7	O88811;Q3TGH8;O88811-2	Signal transducing adapter molecule 2	Stam2	2610900	0.38133
Q99P72;Q99P72-3;Q8BHF5;Q8BH78	Q99P72;Q99P72-3	Reticulon-4	Rtn4	5059000	0.174307
Q8VDP4	Q8VDP4	DBIRD complex subunit KIAA1967 homolog		675030	0.142438
Q62422	Q62422	Osteoclast-stimulating factor 1	Ostf1	35600000	0.399808
Q3UCC5;Q6P8I4;F8WI88;Q3TM89;D3YWA4	Q3UCC5;Q6P8I4;F8WI88;Q3TM89;D3YWA4	PEST proteolytic signal-containing nuclear protein	Pcnp	18100000	0.71772
Q5SV85-2;Q5SV85;F6YUG5	Q5SV85-2;Q5SV85	Synergin gamma	Synrg	0	NaN
Q8R127;D3YZ22;Q3ULN6;F6S0R8;F6SP57	Q8R127;D3YZ22;Q3ULN6;F6S0R8	Saccharopine dehydrogenase-like oxidoreductase	Sccpdh	16800000	0.886289
D3Z4V2;D3Z3F1;Q9D824;Q9D824-2;Q9D824-3;D3Z619;Q9D824-4	D3Z4V2;D3Z3F1;Q9D824;Q9D824-2;Q9D824-3;D3Z619;Q9D824-4	Pre-mRNA 3-end-processing factor FIP1	Fip1l1	1294000	0.383362
O35127	O35127	Protein C10	Grcc10	5037300	1.01037
G5E8R8;Q6P5G6	G5E8R8;Q6P5G6	UBX domain-containing protein 7	Ubxn7	131020	NaN
Q9CSU0;Q9CSU0-2;Q9CSU0-3;F6YB25;F7DAY5	Q9CSU0;Q9CSU0-2;Q9CSU0-3	Regulation of nuclear pre-mRNA domain-containing protein 1B	Rprd1b	3764400	0.318745
Q8BTV2;Q8BTV2-2;Q8BTV2-3	Q8BTV2;Q8BTV2-2;Q8BTV2-3	Cleavage and polyadenylation specificity factor subunit 7	Cpsf7	0	NaN
B1AQZ2;P28741;Q3UI47;E9PYA1;Q3TET1;E9QA32;B1AQZ5	B1AQZ2;P28741;Q3UI47;E9PYA1;Q3TET1	Kinesin-like protein KIF3A	Kif3a	199810	NaN
Q542V3;Q8VE97;A2A837;E9Q4U8	Q542V3;Q8VE97;A2A837;E9Q4U8	Serine/arginine-rich splicing factor 4	Srsf4	5443000	0.337075
Q9D662;Q3U2Q0;A2ANA0;A2AN99;A2AN98	Q9D662	Protein transport protein Sec23B	Sec23b	6146800	0.147621
Q8QZY9;E9Q057	Q8QZY9;E9Q057	Splicing factor 3B subunit 4	Sf3b4;Gm7935	5519600	0.776036
Q9ET54;Q9ET54-6;Q9ET54-4;Q9ET54-5;Q9ET54-3;Q9ET54-2	Q9ET54;Q9ET54-6;Q9ET54-4;Q9ET54-5;Q9ET54-3;Q9ET54-2	Palladin	Palld	13500000	0.348894
Q3U647;Q60967	Q3U647;Q60967	Bifunctional 3-phosphoadenosine 5-phosphosulfate synthase 1;Sulfate adenylyltransferase;Adenylyl-sulfate kinase	Papss1	974930	0.121942
P83940	P83940	Transcription elongation factor B polypeptide 1	Tceb1	84500000	1.14532
Q8CFE2;D6RIJ8	Q8CFE2	UPF0609 protein C4orf27 homolog		103100	NaN
Q8BUR4;Q8BUR4-2	Q8BUR4;Q8BUR4-2	Dedicator of cytokinesis protein 1	Dock1	216640	0.20552
Q8C167;Q8C167-2;Q8C167-3;Q8C167-4	Q8C167;Q8C167-2;Q8C167-3	Prolyl endopeptidase-like	Prepl	845800	0.20092
Q8BHJ9;B0QZT9	Q8BHJ9	Pre-mRNA-splicing factor SLU7	Slu7	556520	NaN
A2BDV9;P35991;A2BDW0	A2BDV9;P35991;A2BDW0	Tyrosine-protein kinase BTK	Btk	0	NaN
Q8BX10;Q8BX10-2;F6YJC6	Q8BX10;Q8BX10-2	Serine/threonine-protein phosphatase PGAM5, mitochondrial	Pgam5	2764800	0.543537
A2A6Q1;Q9JM96;A2A6Q2;A2A6Q3	A2A6Q1;Q9JM96;A2A6Q2	Cdc42 effector protein 4	Cdc42ep4	0	NaN
Q3TZ63;Q8R3D1	Q3TZ63;Q8R3D1	TBC1 domain family member 13	Tbc1d13	107000000	1.52441
E9Q7G0;E9QAZ0	E9Q7G0		Numa1	32700000	0.212499
Q8BLF1;Q8BYQ0	Q8BLF1	Neutral cholesterol ester hydrolase 1	Nceh1	685340	NaN
Q8CIG8;F6QQQ6	Q8CIG8	Protein arginine N-methyltransferase 5	Prmt5	1587200	0.217822
Q8VEA4	Q8VEA4	Mitochondrial intermembrane space import and assembly protein 40	Chchd4	36400000	1.49309
Q499X7;Q9WUM4	Q499X7;Q9WUM4	Coronin-1C	Coro1c	6405700	0.199844
E9PVS5	E9PVS5		Immt	1405400	NaN
Q9Z1G4;A2A5A0;Q9Z1G4-2;A2A5A2;Q9Z1G4-3;Q3TY98;E9Q4L3;A2A599	Q9Z1G4;A2A5A0;Q9Z1G4-2;A2A5A2;Q9Z1G4-3;Q3TY98	V-type proton ATPase 116 kDa subunit a isoform 1	Atp6v0a1	0	NaN
P27546;P27546-2;E9QPW8;P27546-3;Q78TF3;F6V4Z1;F6XPV7	P27546;P27546-2;E9QPW8;P27546-3	Microtubule-associated protein 4;Microtubule-associated protein	Map4;Mtap4	94700000	0.852515
Q9QYS9-7;F8WHX7;Q9QYS9;Q9QYS9-2;Q9QYS9-6;Q9QYS9-3;Q9QYS9-4;Q9QYS9-8;Q9QYS9-5	Q9QYS9-7;F8WHX7;Q9QYS9;Q9QYS9-2;Q9QYS9-6;Q9QYS9-3;Q9QYS9-4;Q9QYS9-8;Q9QYS9-5	Protein quaking	Qk;Qki	34600000	1.89326
Q5DTM8;Q5DTM8-2;A2AIR2;A2AIR0;A2AIR1	Q5DTM8;Q5DTM8-2;A2AIR2	E3 ubiquitin-protein ligase BRE1A	Rnf20	5905500	0.32635
D3YXK2;E9PZM6	D3YXK2;E9PZM6	Scaffold attachment factor B1	Safb	409360	NaN
Q9JM76;H7BWZ3	Q9JM76;H7BWZ3	Actin-related protein 2/3 complex subunit 3	Arpc3	43900000	0.361664
Q9R1Z8	Q9R1Z8	Vinexin	Sorbs3	4923600	0.560224
Q8BTS3	Q8BTS3		Gbp9	67100000	0.556824
Q61704;E9PVS1;CON__Q0V8M9;F6ZXJ7	Q61704;E9PVS1	Inter-alpha-trypsin inhibitor heavy chain H3	Itih3	7297300	2.0452
B2RTK3;P10854;Q64478;Q64525;Q6ZWY9	B2RTK3;P10854;Q64478;Q64525;Q6ZWY9	Histone H2B;Histone H2B type 1-M;Histone H2B type 1-H;Histone H2B type 2-B;Histone H2B type 1-C/E/G	Hist1h2bm;Hist1h2bh;Hist2h2bb;Hist1h2bc	211000000	0.78456
Q8BWM0	Q8BWM0	Prostaglandin E synthase 2;Prostaglandin E synthase 2 truncated form	Ptges2	43900000	1.35753
H7BX08;E9Q4Q5;Q8C1B1-2;Q8C1B1	H7BX08;E9Q4Q5;Q8C1B1-2;Q8C1B1	Calmodulin-regulated spectrin-associated protein 2	Camsap2	24661	NaN
Q8C129	Q8C129	Leucyl-cystinyl aminopeptidase	Lnpep	24300000	0.257665
P97471	P97471	Mothers against decapentaplegic homolog 4	Smad4	0	NaN
P63002-2;E9QJV9;P63002;Q3TYD9	P63002-2;E9QJV9;P63002;Q3TYD9	Amino-terminal enhancer of split	Aes	678870	NaN
D3Z687;A2CF78;Q9DCT6;A2CF81;Q9DCT6-2;F6XN97;F6SYB8;F8WH46;H3BJI0	D3Z687;A2CF78;Q9DCT6;A2CF81;Q9DCT6-2;F6XN97;F6SYB8;F8WH46	Chromatin complexes subunit BAP18	0610010K14Rik;Bap18	3124700	0.372717
Q9WVA3	Q9WVA3	Mitotic checkpoint protein BUB3	Bub3	4937400	0.283913
Q5SUH6;Q5SUH7;Q99KN9;Q99KN9-2	Q5SUH6;Q5SUH7;Q99KN9;Q99KN9-2	Clathrin interactor 1	Clint1	50300000	0.49456
Q3U3G8;Q80XK9;Q9EPB5;F6TMN2	Q3U3G8;Q80XK9;Q9EPB5	Serine hydrolase-like protein	Serhl	32100000	0.833125
Q9CVB6;D3YXG6	Q9CVB6;D3YXG6	Actin-related protein 2/3 complex subunit 2	Arpc2	123000000	0.394742
E9PYF2;O35598;E9Q162;D3Z1E6	E9PYF2;O35598;E9Q162	Disintegrin and metalloproteinase domain-containing protein 10	Adam10	809990	0.347138
B8JK30;Q9D0E1;Q3THB3;Q9D0E1-2;B8JK32;B8JK33;F6W322;F7C9U3	B8JK30;Q9D0E1;Q3THB3;Q9D0E1-2;B8JK32;B8JK33	Heterogeneous nuclear ribonucleoprotein M	Hnrnpm	21800000	0.292065
Q9Z247	Q9Z247	Peptidyl-prolyl cis-trans isomerase FKBP9	Fkbp9	0	NaN
Q4ADG5;Q99KP6-2;Q99KP6;Q99KP6-3	Q4ADG5;Q99KP6-2;Q99KP6;Q99KP6-3	Pre-mRNA-processing factor 19	Prpf19	7275800	0.343666
O54984	O54984	ATPase Asna1	Asna1	44700000	0.791202
Q91VC3;A2AFK7;D3YU49	Q91VC3;A2AFK7;D3YU49	Eukaryotic initiation factor 4A-III	Eif4a3;Gm8994	20800000	0.363438
Q60596	Q60596	DNA repair protein XRCC1	Xrcc1	0	NaN
Q3UHB1;F7CQV9	Q3UHB1;F7CQV9	5-nucleotidase domain-containing protein 3	Nt5dc3	4798000	0.763592
D3Z1V4;P70296;Q5EBQ2;D6RHS6	D3Z1V4;P70296;Q5EBQ2;D6RHS6	Phosphatidylethanolamine-binding protein 1;Hippocampal cholinergic neurostimulating peptide	Pebp1	724000000	1.1093
A2AMV7;P47757-2;Q923G3;A2AMW0	A2AMV7;P47757-2;Q923G3;A2AMW0		Capzb	126000000	0.509658
Q8CFE3;E9QK09	Q8CFE3;E9QK09	REST corepressor 1	Rcor1	1082200	0.248244
O88492;O88492-2	O88492;O88492-2	Perilipin-4	Plin4	32100000	0.772857
Q8BND5;Q8BND5-2;Q8BND5-3	Q8BND5;Q8BND5-2;Q8BND5-3	Sulfhydryl oxidase 1	Qsox1	162380	NaN
Q91VX2;A2AMY5	Q91VX2;A2AMY5	Ubiquitin-associated protein 2	Ubap2	876780	0.27619
P97864;Q4FJQ4	P97864;Q4FJQ4	Caspase-7;Caspase-7 subunit p20;Caspase-7 subunit p11	Casp7	69371	NaN
Q08619	Q08619	Interferon-activable protein 205-B	Ifi205b	1984700	0.29366
E9PVA6;F7BIK4;F6WV69;D3Z409	E9PVA6;F7BIK4		Git2	128460	NaN
E9PW46;Q8C8R3-2	E9PW46;Q8C8R3-2		Ank2	13000000	0.6054
Q91YJ2	Q91YJ2	Sorting nexin-4	Snx4	3306500	0.237085
Q80UE5;Q80UE4;E9Q4H2	Q80UE5;Q80UE4;E9Q4H2		Epb4.1l2	0	NaN
O08911	O08911	Mitogen-activated protein kinase 12	Mapk12	844320	NaN
A3KGQ8;Q9CW79;Q9CW79-2	A3KGQ8;Q9CW79;Q9CW79-2	Golgin subfamily A member 1	Golga1	444480	0.194894
E9QAQ7;A2BH40;A2BH40-3;A2BH40-2;A2BH40-4	E9QAQ7;A2BH40;A2BH40-3;A2BH40-2;A2BH40-4	AT-rich interactive domain-containing protein 1A	Arid1a	0	NaN
P62827;Q14AA6;A6H622;Q61820	P62827;Q14AA6	GTP-binding nuclear protein Ran	Ran;1700009N14Rik	259000000	0.755458
Q8VHN8;Q8VHN8-2	Q8VHN8;Q8VHN8-2	Protein syndesmos	Nudt16l1	115980	NaN
Q3UND0;Q3UND0-2	Q3UND0;Q3UND0-2	Src kinase-associated phosphoprotein 2	Skap2	285040	NaN
Q6P8X1	Q6P8X1	Sorting nexin-6	Snx6	31700000	0.407067
Q61550	Q61550	Double-strand-break repair protein rad21 homolog	Rad21	933750	0.366905
Q64213;Q3UI45;Q64213-3;D3YZD0;D3YZC9;E9Q4Q2;Q64213-2;D3YVH4;F8WHF9	Q64213;Q3UI45;Q64213-3;D3YZD0;D3YZC9;E9Q4Q2;Q64213-2;D3YVH4	Splicing factor 1	Sf1	12800000	0.481255
Q810V0;E9Q4C9	Q810V0;E9Q4C9	U3 small nucleolar ribonucleoprotein protein MPP10	Mphosph10	1196000	1.31686
P16546	P16546	Spectrin alpha chain, brain	Sptan1	713980	NaN
Q3ULF7;Q99JY9	Q3ULF7;Q99JY9	Actin-related protein 3	Actr3	28300000	0.154238
F8WGT0;P26039;A2AIM2;F6SX70;F6S1V7	F8WGT0;P26039	Talin-1	Tln1	222000000	0.35312
Q6XLQ8;G3V004;G3UXA8;G3UYI3;G3UXA3	Q6XLQ8;G3V004		Calu	32600000	3.61925
Q9JIY5;D3YX27;D3YX28;F6TCV0	Q9JIY5;D3YX27;D3YX28;F6TCV0	Serine protease HTRA2, mitochondrial	Htra2	30800000	4.42556
Q9DCJ5	Q9DCJ5	NADH dehydrogenase [ubiquinone] 1 alpha subcomplex subunit 8	Ndufa8	1120000000	2.24507
Q3U5Q7	Q3U5Q7	UMP-CMP kinase 2, mitochondrial	Cmpk2	9136000	0.652146
E9PXY8;Q6A4J8-2;E9QLK0;F8VPX1;Q6A4J8;Q6A4J8-3;G3UWR8	E9PXY8;Q6A4J8-2;E9QLK0;F8VPX1;Q6A4J8;Q6A4J8-3	Ubiquitin carboxyl-terminal hydrolase;Ubiquitin carboxyl-terminal hydrolase 7	Usp7	1691100	0.164422
Q91WE2	Q91WE2	Protein FAM192A	Fam192a	0	NaN
Q9Z0J0	Q9Z0J0	Epididymal secretory protein E1	Npc2	4002900	0.262274
G3X8V1;Q9QVP9;Q3UDE9;E9Q2A6;F7CCX1	G3X8V1;Q9QVP9;Q3UDE9;E9Q2A6	Protein-tyrosine kinase 2-beta	Ptk2b	1175000	0.815195
P97930;D3Z3R3;P97930-2;Q6GRA7	P97930;D3Z3R3	Thymidylate kinase	Dtymk	2445800	0.749008
O54865	O54865	Guanylate cyclase soluble subunit beta-1	Gucy1b3	833240	0.125705
Q543H0;Q64674	Q543H0;Q64674	Spermidine synthase	Srm	11000000	0.226393
Q545E6;Q62348	Q545E6;Q62348	Translin	Tsn	1022800	0.207018
Q9CRA5;Q05BZ0;Q9CRA5-2	Q9CRA5	Golgi phosphoprotein 3	Golph3	6355700	0.194882
P31938;Q3TMJ8	P31938;Q3TMJ8	Dual specificity mitogen-activated protein kinase kinase 1	Map2k1	36400000	0.32257
P63028;D3YU75	P63028;D3YU75	Translationally-controlled tumor protein	Tpt1	225000000	0.721657
A2AUE2;P60904;G5E8T0;A2AUE1	A2AUE2;P60904;G5E8T0;A2AUE1	DnaJ homolog subfamily C member 5	Dnajc5	1391700	NaN
Q924H7;Q924H7-2;E9Q5D5;Q924H7-3;E9PZH6;E9Q020;E9Q4Y9;F6Z247;F7A7S5;E9PXS5;F6R357;F7CLA8;E9PVK9;E9Q6U6	Q924H7;Q924H7-2;E9Q5D5;Q924H7-3;E9PZH6	WW domain-containing adapter protein with coiled-coil	Wac	358450	NaN
E9QK41;Q8K4G5;E9Q9C2;E9Q9C1;E9Q9C9;E9Q9C0;E9Q9C8;Q8K4G5-2;E9Q1E8;E9Q9C7;E9Q9C4;Q8K4G5-4;E9Q030;Q8K4G5-3;E9Q9D2;E9Q9D1;E9Q9Q7;F6YHE5;Q8K4G5-5	E9QK41;Q8K4G5;E9Q9C2;E9Q9C1;E9Q9C9;E9Q9C0;E9Q9C8;Q8K4G5-2;E9Q1E8;E9Q9C7;E9Q9C4;Q8K4G5-4	Actin-binding LIM protein 1	Ablim1	106000000	6.84885
P97360;Q80WR3;E9QAJ7;E9Q8J8	P97360;Q80WR3;E9QAJ7;E9Q8J8	Transcription factor ETV6	Etv6	101230	NaN
A2AMH4;Q6X893-2;A2AMH5;F8WH94;Q6X893;A2AMH3;A2AMH8	A2AMH4;Q6X893-2;A2AMH5;F8WH94;Q6X893;A2AMH3	Choline transporter-like protein 1	Slc44a1	0	NaN
Q4VBE8	Q4VBE8	WD repeat-containing protein 18	Wdr18	57817	NaN
Q8C243;P18242;Q3UCD9;F6Y6L6;Q05BF3	Q8C243;P18242;Q3UCD9;F6Y6L6	Cathepsin D	Ctsd	639000000	1.3356
Q91WG5;Q8BIQ9;Q3TMN8;Q91WG5-2;D3YYW4	Q91WG5;Q8BIQ9;Q3TMN8;Q91WG5-2;D3YYW4	5-AMP-activated protein kinase subunit gamma-2	Prkag2	738480	0.362739
E9PUF7;Q61210;Q61210-4;Q61210-3;Q61210-5;Q61210-2;F6ZN61	E9PUF7;Q61210;Q61210-4;Q61210-3;Q61210-5;Q61210-2;F6ZN61	Rho guanine nucleotide exchange factor 1	Arhgef1	401510	NaN
P84078;A2A6T7;P61205;Q3U344;Q8BSL7;D3YV25	P84078;A2A6T7;P61205;Q3U344;Q8BSL7	ADP-ribosylation factor 1;ADP-ribosylation factor 3;ADP-ribosylation factor 2	Arf1;Arf2;Arf3	14900000	0.358218
Q60790;D6RFE0	Q60790	Ras GTPase-activating protein 3	Rasa3	922270	0.894215
B1AQF4;B1AQF3;Q9D7X3;H3BKL8;Q3V2Y9;H3BKD1	B1AQF4;B1AQF3;Q9D7X3;H3BKL8;Q3V2Y9	Dual specificity protein phosphatase 3	Dusp3	8204900	1.7431
Q8BL95;D3YZC4;D6REH7	Q8BL95;D3YZC4;D6REH7		1110004E09Rik	740760	NaN
E9QK48;Q7TNG5-2;Q7TNG5;D3YWS2;D6RGM3	E9QK48;Q7TNG5-2;Q7TNG5;D3YWS2;D6RGM3	Echinoderm microtubule-associated protein-like 2	Eml2	10100000	0.557072
P84084	P84084	ADP-ribosylation factor 5	Arf5	7886600	0.271003
Q3TKY6	Q3TKY6	Peptidyl-prolyl cis-trans isomerase CWC27 homolog	Cwc27	0	NaN
Q9CQJ8	Q9CQJ8	NADH dehydrogenase [ubiquinone] 1 beta subcomplex subunit 9	Ndufb9	254000000	2.61835
B2RQ80;E9PUL9;E0CY98;E0CZD7;B9EKN8;P83510;E0CXD6;E9Q617;P83510-2;E0CZF8;E0CYV5	B2RQ80;E9PUL9;E0CY98;E0CZD7;B9EKN8;P83510;E0CXD6;E9Q617;P83510-2;E0CZF8	Traf2 and NCK-interacting protein kinase	Tnik	0	NaN
Q8CI71;Q8CI71-3;Q8CI71-2;E9Q6W3	Q8CI71;Q8CI71-3;Q8CI71-2;E9Q6W3	Coiled-coil domain-containing protein 132	Ccdc132	1309900	NaN
Q9JMD0;E9PW12;Q99LA2;Q8CCB2;B1AQG7	Q9JMD0;E9PW12;Q99LA2;Q8CCB2;B1AQG7		Zfp207	5992600	0.280473
Q8BTZ7	Q8BTZ7	Mannose-1-phosphate guanyltransferase beta	Gmppb	2355100	0.126868
Q9CPZ8	Q9CPZ8	COX assembly mitochondrial protein homolog	Cmc1	22700000	2.07486
B1AXY3;Q3UKJ7;Q3UKJ7-2	B1AXY3;Q3UKJ7	WD40 repeat-containing protein SMU1	Smu1	15300000	0.296428
Q58E59;Q9D554	Q58E59;Q9D554	Splicing factor 3A subunit 3	Sf3a3	5624600	0.394337
Q5NCR9	Q5NCR9	Nuclear speckle splicing regulatory protein 1	Nsrp1	0	NaN
Q8VDW0;Q3UAF1;D6RHT5;Q8VDW0-2	Q8VDW0;Q3UAF1	ATP-dependent RNA helicase DDX39A	Ddx39a;Ddx39	3503800	0.176351
O08583;Q9JJW6;Q9JJW6-2;O08583-2;G3X9I4	O08583;Q9JJW6;Q9JJW6-2;O08583-2;G3X9I4	THO complex subunit 4;RNA and export factor-binding protein 2	Alyref;Refbp2;Alyref2	7811800	0.75959
Q544R5;Q921F2;Q6VYI4;Q6VYI5;Q8BLD4;Q8R0B4;E9Q830;F8WIJ9	Q544R5;Q921F2;Q6VYI4;Q6VYI5;Q8BLD4;Q8R0B4;E9Q830;F8WIJ9	TAR DNA-binding protein 43	Tardbp	28500000	0.270197
Q9D1C8;G3UW95	Q9D1C8;G3UW95	Vacuolar protein sorting-associated protein 28 homolog	Vps28	9723700	0.877193
D3Z7X0;D3Z2B3	D3Z7X0;D3Z2B3		Acad12	146000000	9.46074
Q6ZWP4;Q9Z0H3	Q6ZWP4;Q9Z0H3	SWI/SNF-related matrix-associated actin-dependent regulator of chromatin subfamily B member 1	Smarcb1	2331800	0.257712
Q60902;F8WJ42;Q60902-3;F6ZE93	Q60902;F8WJ42;Q60902-3;F6ZE93	Epidermal growth factor receptor substrate 15-like 1	Eps15l1	42000000	0.68899
Q99J27	Q99J27	Acetyl-coenzyme A transporter 1	Slc33a1	91400000	1.29715
Q9CYG7;Q9CYG7-2	Q9CYG7;Q9CYG7-2	Mitochondrial import receptor subunit TOM34	Tomm34	1003000	NaN
Q9DB05	Q9DB05	Alpha-soluble NSF attachment protein	Napa	40300000	0.369331
Q3UL36;Q3UL36-2	Q3UL36;Q3UL36-2	Arginine and glutamate-rich protein 1	Arglu1	7288400	0.350201
Q6ZQI3;D3Z1M3	Q6ZQI3;D3Z1M3	Malectin	Mlec	6057400	0.228943
P56480	P56480	ATP synthase subunit beta, mitochondrial	Atp5b	21400000000	6.99252
Q4FK74;Q9D3D9;D3Z7S4	Q4FK74;Q9D3D9	ATP synthase subunit delta, mitochondrial	Atp5d	650000000	11.1438
Q5SQX6;E9Q245;E9Q594;F6QD74	Q5SQX6;E9Q245;E9Q594;F6QD74	Cytoplasmic FMR1-interacting protein 2	Cyfip2	1615800	0.149622
Q04736;Q3TJI7	Q04736;Q3TJI7	Tyrosine-protein kinase Yes	Yes1	1483300	0.229232
P62960;Q3UBT1;A2BGG7	P62960;Q3UBT1	Nuclease-sensitive element-binding protein 1	Ybx1	124000000	0.947867
E9QMZ5;Q9QXS1-3	E9QMZ5;Q9QXS1-3		Plec	172000000	0.370686
Q3V384;F6VT60;E9Q4K2;F6RBS7	Q3V384;F6VT60;E9Q4K2	Lactation elevated protein 1	Lace1	9912100	1.0443
Q8R4X3;F6YJB6;F7C9M1;B7ZCP9;B7ZCQ0;B7ZCQ1	Q8R4X3;F6YJB6;F7C9M1	RNA-binding protein 12	Rbm12;Cpne1	1943800	0.384882
P70288;Q8BQ10;E9PXS3	P70288;Q8BQ10	Histone deacetylase 2	Hdac2	931800	0.230436
Q9DD18;Q9DD18-2	Q9DD18;Q9DD18-2	D-tyrosyl-tRNA(Tyr) deacylase 1	Dtd1	18800000	0.828363
Q8C483;P26638;A2AFS0;A2AFS1	Q8C483;P26638;A2AFS0	Serine--tRNA ligase, cytoplasmic	Sars	43900000	0.269484
Q91Z38;A2AJK8	Q91Z38;A2AJK8	Tetratricopeptide repeat protein 1	Ttc1	2615400	0.781739
D4AFX6;Q6ZQK5;Q6ZQK5-2;H7BX80	D4AFX6;Q6ZQK5;Q6ZQK5-2;H7BX80	Arf-GAP with coiled-coil, ANK repeat and PH domain-containing protein 2	Acap2	726320	0.2145
Q9WV02;A2AFI3;Q9WV02-2;A2AFI4	Q9WV02;A2AFI3;Q9WV02-2;A2AFI4	RNA-binding motif protein, X chromosome;RNA-binding motif protein, X chromosome, N-terminally processed	Rbmx	45100000	1.00324
Q4V9X1;Q9JJA4;D3Z369	Q4V9X1;Q9JJA4	Ribosome biogenesis protein WDR12	Wdr12	3189900	0.316026
Q07235;Q543R5	Q07235;Q543R5	Glia-derived nexin	Serpine2	1459000	1.54538
Q60737;A2ANR6	Q60737	Casein kinase II subunit alpha	Csnk2a1	49100000	0.654622
Q9D020-1	Q9D020-1			173000000	4.40373
P70372	P70372	ELAV-like protein 1	Elavl1	23700000	0.453803
Q61548;Q61548-2;Q61548-3;E9QLK9;E9QQ05;E9Q9A3;Q3TWS4;Q8BQA2	Q61548;Q61548-2;Q61548-3;E9QLK9;E9QQ05;E9Q9A3;Q3TWS4	Clathrin coat assembly protein AP180	Snap91	4628800	0.229142
E9PXU2;Q9Z0F8;Q9Z0F8-2	E9PXU2;Q9Z0F8;Q9Z0F8-2	Disintegrin and metalloproteinase domain-containing protein 17	Adam17	86140	NaN
Q9CQK7;E9PXV5	Q9CQK7	RWD domain-containing protein 1	Rwdd1	7717000	0.893895
E9PZZ3;F6ZDS4;Q7M739;F6RX08	E9PZZ3;F6ZDS4;Q7M739		Tpr	51000000	0.36929
Q3UKC1;D3Z213;D3Z715;D3Z152	Q3UKC1	Tax1-binding protein 1 homolog	Tax1bp1	731930	0.186857
Q3TYK4;A2AI68;Q9DBC7;E9Q276;A2AI69	Q3TYK4;A2AI68;Q9DBC7;E9Q276;A2AI69	cAMP-dependent protein kinase type I-alpha regulatory subunit	Prkar1a	69800000	1.64363
E9QAE3	E9QAE3		Btaf1	48100000	NaN
F6SJ65;O35343;Q4FJX1	F6SJ65;O35343;Q4FJX1	Importin subunit alpha-4;Importin subunit alpha	Kpna4	9890700	0.583805
O35326;Q9D8S5;Q640L9;E9QKW3	O35326;Q9D8S5;Q640L9;E9QKW3	Serine/arginine-rich splicing factor 5	Srsf5	13700000	0.203107
A2AS98;A2AS97;P28660;E9QQ62;P28660-2	A2AS98;A2AS97;P28660;E9QQ62;P28660-2	Nck-associated protein 1	Nckap1	3800600	0.222534
Q6PFD9;E9PYP6;E9PZU1	Q6PFD9;E9PYP6;E9PZU1		Nup98	2260400	0.504974
E9QAC6	E9QAC6		Pick1	659640	NaN
Q3U0V1	Q3U0V1	Far upstream element-binding protein 2	Khsrp	11300000	0.200168
F8VQ28;Q8VI36;Q8VI36-2	F8VQ28;Q8VI36;Q8VI36-2	Paxillin	Pxn	7926300	0.357756
Q9JKX6;A2ATT5	Q9JKX6	ADP-sugar pyrophosphatase	Nudt5	15700000	0.399409
E9PZ16;B1B0C7;E9QL02;Q05793;Q3UHH3	E9PZ16;B1B0C7;E9QL02;Q05793	Basement membrane-specific heparan sulfate proteoglycan core protein;Endorepellin;LG3 peptide	Hspg2	16200000	0.376719
Q3UJB0	Q3UJB0		Sf3b2	32600000	0.310058
O35250;Q3USE0;A2AAN0;O35250-2;Q542L0;A2AAN3;A2AAN4	O35250;Q3USE0;A2AAN0;O35250-2;Q542L0	Exocyst complex component 7	Exoc7	2888700	0.264124
Q99KV1	Q99KV1	DnaJ homolog subfamily B member 11	Dnajb11	63000000	0.314347
Q9DB77	Q9DB77	Cytochrome b-c1 complex subunit 2, mitochondrial	Uqcrc2	4100000000	3.79708
Q8BG07;Q8BG07-2	Q8BG07;Q8BG07-2	Phospholipase D4	Pld4	361760	0.140542
Q922E6;F6QIH7	Q922E6;F6QIH7	FAST kinase domain-containing protein 2	Fastkd2	0	NaN
E9PVU0;E9Q174;E9Q175;E9Q3L1;E9QQ82;Q64331;E9Q178	E9PVU0;E9Q174;E9Q175;E9Q3L1;E9QQ82;Q64331	Unconventional myosin-VI	Myo6	10100000	0.127281
Q9D2G2	Q9D2G2	Dihydrolipoyllysine-residue succinyltransferase component of 2-oxoglutarate dehydrogenase complex, mitochondrial	Dlst	685000000	3.04655
Q540E6;Q921J2	Q540E6;Q921J2	GTP-binding protein Rheb	Rheb	50200000	0.712403
O08663;Q58E65	O08663;Q58E65	Methionine aminopeptidase 2;Methionine aminopeptidase	Metap2	305000000	0.580518
A2AMX4;Q9D5V6	A2AMX4;Q9D5V6	Synapse-associated protein 1	Syap1	15200000	0.580215
F7BS72;B2RUE8;E9PVG7;F8VPL5;P97820;B7ZNR9	F7BS72;B2RUE8;E9PVG7;F8VPL5;P97820;B7ZNR9	Mitogen-activated protein kinase kinase kinase kinase 4	Map4k4	38372	NaN
Q8BH74;E9Q4V9	Q8BH74;E9Q4V9	Nuclear pore complex protein Nup107	Nup107	0	NaN
Q3UGB5;Q9JII5;Q9JII5-2;D3Z4J1	Q3UGB5;Q9JII5;Q9JII5-2;D3Z4J1	DAZ-associated protein 1	Dazap1	1574700	NaN
A6H5Z3;A6H5Z3-2;F6Q3Q9;Q8C1X1;E0CXR2;E9Q1K9;Q9D4R7	A6H5Z3;A6H5Z3-2;F6Q3Q9	Exocyst complex component 6B	Exoc6b	75520	NaN
A2AT31;O88441	A2AT31;O88441	Metaxin-2	Mtx2	41100000	1.62483
A2AJ50;Q9D7M1	A2AJ50;Q9D7M1	Protein C20orf11 homolog	2310003C23Rik	2341700	1.02
P62317;Q14AF6;D3Z426;D3Z5N9;E9Q2T1	P62317;Q14AF6;D3Z426;D3Z5N9;E9Q2T1	Small nuclear ribonucleoprotein Sm D2	Snrpd2;Gm10120;Gm5449;Gm5848	22100000	0.454483
O09131;Q8K2Q2;E9Q299;D3Z1Q9	O09131	Glutathione S-transferase omega-1	Gsto1	282000000	0.377972
Q8CHF5;G3X9Q0;Q9JKP5;Q3U581;Q3U570	Q8CHF5;G3X9Q0;Q9JKP5	Muscleblind-like protein 1	Mbnl1	47000000	0.825764
Q91VD9	Q91VD9	NADH-ubiquinone oxidoreductase 75 kDa subunit, mitochondrial	Ndufs1	1710000000	1.86171
O08915;D3YW40	O08915;D3YW40	AH receptor-interacting protein	Aip	6548300	0.472903
Q8JZV7;F6UP77	Q8JZV7;F6UP77	Putative N-acetylglucosamine-6-phosphate deacetylase	Amdhd2	240070	NaN
Q00422;E9Q6K9	Q00422;E9Q6K9	GA-binding protein alpha chain	Gabpa	586040	0.121621
Q6P5E6;Q6P5E6-2	Q6P5E6	ADP-ribosylation factor-binding protein GGA2	Gga2	427290	0.208612
Q8C078-5;E9QQ88;Q8C078;Q8C078-2;Q8C078-3;H7BXA1;Q8C078-4	Q8C078-5;E9QQ88;Q8C078;Q8C078-2;Q8C078-3;H7BXA1;Q8C078-4	Calcium/calmodulin-dependent protein kinase kinase 2	Camkk2	0	NaN
Q9CQ89;D5MCW4;Q9CQ89-3	Q9CQ89;D5MCW4;Q9CQ89-3	Protein CutA	Cuta	17500000	2.29195
Q9D1E6	Q9D1E6	Tubulin-folding cofactor B	Tbcb	3038800	NaN
A2CG14;P63321	A2CG14;P63321	Ras-related protein Ral-A	Rala	7655700	0.650745
A2AJI4;Q569Z6;Q8BZN7;F6YH92;F6YSQ2;F7AB07	A2AJI4;Q569Z6;Q8BZN7	Thyroid hormone receptor-associated protein 3	Thrap3	12200000	0.461489
P49615;Q543F6	P49615;Q543F6	Cyclin-dependent kinase 5	Cdk5	4610100	0.208659
P48771	P48771	Cytochrome c oxidase subunit 7A2, mitochondrial	Cox7a2	309000000	2.17273
Q546F8;Q9D753;D3YYN3	Q546F8;Q9D753;D3YYN3	Exosome complex component RRP43	Exosc8	555120	0.309837
P35821;Q3TZW9	P35821;Q3TZW9	Tyrosine-protein phosphatase non-receptor type 1	Ptpn1	3641300	0.652273
P63158;Q58EV5;D3Z351;D3YZ18;D3YVC6	P63158;Q58EV5;D3Z351;D3YZ18;D3YVC6	High mobility group protein B1	Hmgb1;Hmg1l1	247000000	0.341146
Q8K124	Q8K124	Pleckstrin homology domain-containing family O member 2	Plekho2	200450	NaN
B1AXP1;Q8BMJ3;D3Z367;Q3UT53	B1AXP1;Q8BMJ3	Eukaryotic translation initiation factor 1A, X-chromosomal	Eif1ax	40800000	1.6948
Q7TMF3	Q7TMF3	NADH dehydrogenase [ubiquinone] 1 alpha subcomplex subunit 12	Ndufa12	480000000	4.39001
Q059T9;Q9DAW6	Q059T9;Q9DAW6	U4/U6 small nuclear ribonucleoprotein Prp4	Prpf4	563430	NaN
P62313;Q542U7	P62313;Q542U7	U6 snRNA-associated Sm-like protein LSm6	Lsm6	5687600	1.12667
Q9JIX8-4;Q9JIX8;F6RJ39;B8JJ89	Q9JIX8-4;Q9JIX8;F6RJ39	Apoptotic chromatin condensation inducer in the nucleus	Acin1	26300000	0.303269
Q80X50-5;Q80X50;Q80X50-4;E9Q9Q3;Q80X50-3;E9PZA1	Q80X50-5;Q80X50;Q80X50-4;E9Q9Q3;Q80X50-3	Ubiquitin-associated protein 2-like	Ubap2l	24900000	0.887942
P70670;Q60817	P70670	Nascent polypeptide-associated complex subunit alpha, muscle-specific form	Naca	101000000	0.512847
Q9Z1P6;G3UXZ4	Q9Z1P6	NADH dehydrogenase [ubiquinone] 1 alpha subcomplex subunit 7	Ndufa7	961000000	5.72541
G3X956;Q920B9	G3X956;Q920B9	FACT complex subunit SPT16	Supt16h	3047000	0.211448
Q9DAR7;Q3TBW9;D6RFQ0	Q9DAR7;Q3TBW9	m7GpppX diphosphatase	Dcps	24400000	0.709975
Q8BX02;Q8BX02-2	Q8BX02;Q8BX02-2	KN motif and ankyrin repeat domain-containing protein 2	Kank2	6953100	0.330164
P97352;Q545H7	P97352;Q545H7	Protein S100-A13	S100a13	71100000	1.33595
O09117;O09117-2;Q3TVX7;D6RFU9	O09117;O09117-2;Q3TVX7;D6RFU9	Synaptophysin-like protein 1	Sypl1;Sypl	1903500	0.153381
P31750;F8WJD0;D3Z783;D3YXX3;D3YYP9	P31750;F8WJD0;D3Z783;D3YXX3;D3YYP9	RAC-alpha serine/threonine-protein kinase	Akt1	2876100	0.573263
Q9Z2A0;F2Z3X6;Q3TRL2;F2Z400;F2Z3Z9;F2Z4A5;F2Z3V6	Q9Z2A0;F2Z3X6;Q3TRL2;F2Z400;F2Z3Z9	3-phosphoinositide-dependent protein kinase 1	Pdpk1	0	NaN
Q9CQ10	Q9CQ10	Charged multivesicular body protein 3	Chmp3	1718700	0.429941
P61161;Q5SW83	P61161;Q5SW83	Actin-related protein 2	Actr2	40000000	0.186571
Q5SUR3;Q9WTX5;E9PUV4;E9Q3Q7	Q5SUR3;Q9WTX5;E9PUV4	S-phase kinase-associated protein 1	Skp1a;Skp1	62300000	0.910747
A2AL50;Q8C0I1;H3BKN2;A2AL49;H3BIY5	A2AL50;Q8C0I1;H3BKN2;A2AL49	Alkyldihydroxyacetonephosphate synthase, peroxisomal	Agps	954000	0.17381
E9Q972;P61750;Q14BR4;E9Q798;F6UFB9;E9Q2C2	E9Q972;P61750;Q14BR4;E9Q798	ADP-ribosylation factor 4	Arf4	2338400	0.285233
O55102;D3YVM8;D3Z4L7	O55102;D3YVM8;D3Z4L7	Biogenesis of lysosome-related organelles complex 1 subunit 1	Bloc1s1	1045900	1.48595
Q5SUF2-2;Q5SUF2-3;Q5SUF2;F7A7G1;F7CR21;F8WGA8	Q5SUF2-2;Q5SUF2-3;Q5SUF2	Luc7-like protein 3	Luc7l3	962710	NaN
Q8VE47;F6VRI6	Q8VE47;F6VRI6	Ubiquitin-like modifier-activating enzyme 5	Uba5	1585400	0.168189
Q9QZ23	Q9QZ23	NFU1 iron-sulfur cluster scaffold homolog, mitochondrial	Nfu1	65200000	3.67931
E9Q4S2	E9Q4S2		Nup98	918700	0.20762
Q9WV32;F6THG2;F6VVE6;D3Z6S0	Q9WV32	Actin-related protein 2/3 complex subunit 1B	Arpc1b	20600000	0.129393
Q6A0C2	Q6A0C2		Morc3	0	NaN
P83877;F8WGE7	P83877	Thioredoxin-like protein 4A	Txnl4a	3666400	0.493998
P59708	P59708	Pre-mRNA branch site protein p14	Sf3b14	8224500	0.640656
P60122;Q3U1C2;D3YW60	P60122;Q3U1C2	RuvB-like 1	Ruvbl1	7601800	0.408347
Q9CZD3	Q9CZD3	Glycine--tRNA ligase	Gars	14500000	0.352983
Q4VA29;Q9CQE8	Q4VA29;Q9CQE8	UPF0568 protein C14orf166 homolog	2700060E02Rik	78600000	0.646998
Q8R3W2	Q8R3W2		0610009B22Rik	737430	NaN
F8WGD1;P46061;E9Q757;E9Q2J7	F8WGD1;P46061;E9Q757;E9Q2J7	Ran GTPase-activating protein 1	Rangap1	1045600	0.156377
P59016	P59016	Vacuolar protein sorting-associated protein 33B	Vps33b	318480	0.169702
F8WI30;Q5M8N3;Q9CY18;F6RSR4;Q3TC10;F7D3B8	F8WI30;Q5M8N3;Q9CY18;F6RSR4;Q3TC10;F7D3B8	Sorting nexin-7	Snx7	97341	NaN
F6SL65	F6SL65		Lrrfip2	40700000	1.45966
Q9CR68	Q9CR68	Cytochrome b-c1 complex subunit Rieske, mitochondrial;Cytochrome b-c1 complex subunit 11	Uqcrfs1	2590000000	4.03323
Q9WV27	Q9WV27	Sodium/potassium-transporting ATPase subunit alpha-4	Atp1a4	103830	0.188626
Q9JK42	Q9JK42	[Pyruvate dehydrogenase [lipoamide]] kinase isozyme 2, mitochondrial	Pdk2	34400000	1.27296
P48024;Q4V9T8;G3UW42;D3YXK8	P48024;Q4V9T8;G3UW42;D3YXK8	Eukaryotic translation initiation factor 1	Eif1;Gm6900;Gm16378	112000000	1.32464
Q61990-2;Q61990;Q61990-3;G3UYM5	Q61990-2;Q61990;Q61990-3	Poly(rC)-binding protein 2	Pcbp2	62800000	0.418445
P26369;Q3KQM4	P26369;Q3KQM4	Splicing factor U2AF 65 kDa subunit	U2af2	13400000	0.349345
Q9CQH3;D3Z568;D3Z6W9;D3YX99;F6Y6V5	Q9CQH3;D3Z568;D3Z6W9;D3YX99;F6Y6V5	NADH dehydrogenase [ubiquinone] 1 beta subcomplex subunit 5, mitochondrial	Ndufb5	206000000	6.85589
A2ASC7;Q8C570;Q8CBU3;A2ASC6	A2ASC7;Q8C570;Q8CBU3;A2ASC6	mRNA export factor	Rae1	1962600	NaN
Q02248;E9Q6A9;D3YUH4;E9PW26;D3Z5Q1;F6QZ47;D3Z7S6;F7BAC9	Q02248;E9Q6A9	Catenin beta-1	Ctnnb1	10900000	0.273179
A2AEW8;Q8VD04;A2AEW9;A2AEW5;A2AEW6	A2AEW8;Q8VD04;A2AEW9;A2AEW5;A2AEW6	GRIP1-associated protein 1	Gripap1	14300000	0.520752
E9Q512;H3BJG4;Q8BVJ9;H3BJU5	E9Q512;H3BJG4		Trip11	2714400	0.382482
A2BGM2;Q9CQI7;A2CES4	A2BGM2;Q9CQI7;A2CES4	U2 small nuclear ribonucleoprotein B	Snrpb2	19400000	0.72406
P23591;Q5HZI6	P23591;Q5HZI6	GDP-L-fucose synthase	Tsta3	9773800	0.230595
P55284	P55284	Cadherin-5	Cdh5	236070	NaN
Q99J36	Q99J36	THUMP domain-containing protein 1	Thumpd1	13100000	0.564334
Q3U7Z6;Q9DBJ1	Q3U7Z6;Q9DBJ1	Phosphoglycerate mutase 1	Pgam1	265000000	0.39703
H9KV00;Q9QX47;Q9QX47-3;H9KV15;H9KV01;Q9QX47-4;Q9QX47-2;H9KUX7;H9KV02;F7CU80;Q8BM30	H9KV00;Q9QX47;Q9QX47-3;H9KV15;H9KV01;Q9QX47-4;Q9QX47-2;H9KUX7	Protein SON	Son	46400000	0.287365
E9PW44;E9Q5K9;E9Q7Z8;D6RG95	E9PW44;E9Q5K9;E9Q7Z8;D6RG95		Ythdc1	0	NaN
Q99K30;Q99K30-2	Q99K30	Epidermal growth factor receptor kinase substrate 8-like protein 2	Eps8l2	6969300	0.213748
Q8BYH7	Q8BYH7	TBC1 domain family member 17	Tbc1d17	237270	NaN
Q9D1D4;Q9D1D4-2	Q9D1D4	Transmembrane emp24 domain-containing protein 10	Tmed10	36400000	0.34195
P51859;E0CXA0;E0CYW7	P51859;E0CXA0	Hepatoma-derived growth factor	Hdgf	192000000	0.662778
B1AV56;Q9WTL7	B1AV56;Q9WTL7	Acyl-protein thioesterase 2	Lypla2	35100000	0.553465
D3YU44;Q3UKC8;Q80SZ7;D3Z7Q3	D3YU44;Q3UKC8;Q80SZ7;D3Z7Q3	Guanine nucleotide-binding protein subunit gamma;Guanine nucleotide-binding protein G(I)/G(S)/G(O) subunit gamma-5	Gm3150;Gng5	966890	NaN
F8WJE0;Q60710;E9Q0K6;F6TVP2;E9PYG9;E0CXZ5	F8WJE0;Q60710;E9Q0K6;F6TVP2;E9PYG9	SAM domain and HD domain-containing protein 1	Samhd1	13500000	0.197531
P24527	P24527	Leukotriene A-4 hydrolase	Lta4h	52900000	0.203579
B2RQE8;Q9D333	B2RQE8	Rho GTPase-activating protein 42	Arhgap42	0	NaN
Q9CQJ2	Q9CQJ2	PIH1 domain-containing protein 1	Pih1d1	352670	NaN
Q8K1J6;Q8K1J6-2	Q8K1J6	CCA tRNA nucleotidyltransferase 1, mitochondrial	Trnt1	18800000	0.691372
Q8CCF0;Q8CCF0-3;Q8CCF0-2;Q8CCF0-5;Q8CCF0-4	Q8CCF0;Q8CCF0-3;Q8CCF0-2	U4/U6 small nuclear ribonucleoprotein Prp31	Prpf31	3056800	0.230808
D3Z7Q2	D3Z7Q2		1810013D10Rik	21400000	NaN
Q3TJ22	Q3TJ22		Aamp	0	NaN
Q6ZPZ3;E9Q8K8;Q6ZPZ3-2	Q6ZPZ3;E9Q8K8;Q6ZPZ3-2	Zinc finger CCCH domain-containing protein 4	Zc3h4	75011	NaN
Q9CWU9	Q9CWU9	Nucleoporin Nup37	Nup37	1035500	NaN
Q923U0;Q8BZR6;A6PWP3;Q923U0-3	Q923U0;Q8BZR6;A6PWP3;Q923U0-3	TOM1-like protein 1	Tom1l1	3900500	0.577334
F8WIA1;D3Z2Z1;Q922J3;D3Z3M7;Q922J3-2;F6RCU2;Q8C0S5;E9Q4F5;F6RAY2	F8WIA1;D3Z2Z1;Q922J3;D3Z3M7;Q922J3-2;F6RCU2;Q8C0S5	CAP-Gly domain-containing linker protein 1	Clip1	108000000	1.52437
Q3USV9;Q8R5L3;Q5KU38;Q8R5L3-2	Q3USV9;Q8R5L3;Q5KU38;Q8R5L3-2	Vam6/Vps39-like protein	Vps39	27079	NaN
Q8BIK4-2;E9Q1J1;E9QMR3;F8VPN7;E9QMR2;Q8BIK4;Q6PF84;Q8BIK4-3;A2AF65	Q8BIK4-2;E9Q1J1;E9QMR3;F8VPN7;E9QMR2;Q8BIK4;Q6PF84	Dedicator of cytokinesis protein 9	Dock9	5065700	NaN
Q6ZWQ0;E9QP46;Q6DFZ2;Q6ZWQ0-3;F6W8R9;Q6ZWN0;Q6ZWQ0-2;F7BX34;D3Z2J8;D3YVK9;D3Z2P5	Q6ZWQ0;E9QP46	Nesprin-2	Syne2	0	NaN
Q9JIX0	Q9JIX0	Enhancer of yellow 2 transcription factor homolog	Eny2	8004200	0.363135
Q9CPW7	Q9CPW7	Zinc finger matrin-type protein 2	Zmat2	2143900	NaN
Q3TWW8	Q3TWW8		Srsf6	7885400	0.222608
Q9Z1K5;H9KV21;H7BWY7	Q9Z1K5;H9KV21;H7BWY7	E3 ubiquitin-protein ligase ARIH1	Arih1	467460	0.184993
P29387	P29387	Guanine nucleotide-binding protein subunit beta-4	Gnb4	144000000	2.39607
F8VPY9;Q3V1D3;H3BIY4	F8VPY9;Q3V1D3	AMP deaminase 1	Ampd1	0	NaN
B2RUR0;O35601;O35601-2	B2RUR0;O35601;O35601-2	FYN-binding protein	Fyb	1008200	0.718442
E9Q3X0;Q9EQK5;D3Z2N7	E9Q3X0;Q9EQK5	Major vault protein	Mvp	131000000	0.429461
Q5U4D9;D3Z132;D3Z131;D3YUL7;F6S2T7	Q5U4D9;D3Z132;D3Z131;D3YUL7;F6S2T7	THO complex subunit 6 homolog	Thoc6	154080	0.18442
E9QB05;B9EJA4;Q08EB5;Q08EB6;E9Q8N5;Q8BRT1;E9QQ37;Q8BRT1-5;Q8BSE7;Q8BRT1-6	E9QB05;B9EJA4;Q08EB5;Q08EB6;E9Q8N5;Q8BRT1;E9QQ37;Q8BRT1-5	CLIP-associating protein 2	Clasp2	0	NaN
P70388;Q5SV02;E9QPC6;P70388-2;A8Y5I3;E9PUJ2;P70388-4;P70388-3	P70388;Q5SV02;E9QPC6;P70388-2;A8Y5I3	DNA repair protein RAD50	Rad50	0	NaN
Q3TMX5;Q9CXI5;Q80ZP8;E0CXA8;F6T4L3;F6USD5;F7C1S6	Q3TMX5;Q9CXI5;Q80ZP8;E0CXA8;F6T4L3;F6USD5	Mesencephalic astrocyte-derived neurotrophic factor	Manf	179000000	0.23667
P29699;Q3UEK9	P29699;Q3UEK9	Alpha-2-HS-glycoprotein	Ahsg	321000000	5.1709
Q9JI10;Q9JI10-2;D6RHQ9	Q9JI10;Q9JI10-2	Serine/threonine-protein kinase 3;Serine/threonine-protein kinase 3 36kDa subunit;Serine/threonine-protein kinase 3 20kDa subunit	Stk3	1335200	0.225989
P43025;Q8CFZ6	P43025;Q8CFZ6	Tetranectin	Clec3b	6607200	0.918189
Q3TLP8;P63001;P60764;Q14A12;A2AC13	Q3TLP8;P63001;P60764;Q14A12	Ras-related C3 botulinum toxin substrate 1;Ras-related C3 botulinum toxin substrate 3	Rac1;Rac3	2601100	0.215787
Q0VGB7;E9PZV4	Q0VGB7	Serine/threonine-protein phosphatase 4 regulatory subunit 2	Ppp4r2	0	NaN
E9PVY4;O88531;Q3U6J9;B1B0P9;B1B0P8	E9PVY4;O88531;Q3U6J9	Palmitoyl-protein thioesterase 1	Ppt1	10300000	0.287241
A2ARQ7;Q9CR41;Q9CR41-2	A2ARQ7;Q9CR41;Q9CR41-2	Huntingtin-interacting protein K	2310003F16Rik;Hypk	22800000	2.57447
Q80YR5;F6TC77;F6X6Q7;D6RHP9;F6WIZ2;D6RJ78;F6Z0Y5;F6XJ79	Q80YR5;F6TC77;F6X6Q7	Scaffold attachment factor B2	Safb2	1181900	0.296577
Q8K0C8	Q8K0C8	Cytochrome c oxidase assembly protein COX19	Cox19	7996200	1.34282
Q8K400;D3Z079;D3Z6W8;D3Z2Q2;Q8K400-2;F6WXQ4	Q8K400;D3Z079;D3Z6W8;D3Z2Q2;Q8K400-2;F6WXQ4	Syntaxin-binding protein 5	Stxbp5	0	NaN
P57780;Q3ULT2;D3Z761	P57780;Q3ULT2	Alpha-actinin-4	Actn4	258000000	0.15262
P53995;A2ATQ5	P53995;A2ATQ5	Anaphase-promoting complex subunit 1	Anapc1	0	NaN
Q3TR20;Q3UM29	Q3TR20;Q3UM29	Conserved oligomeric Golgi complex subunit 7	Cog7	668580	0.329272
Q3UHZ7;Q91YN5;Q91YN5-3;Q91YN5-2	Q3UHZ7;Q91YN5;Q91YN5-3;Q91YN5-2	UDP-N-acetylhexosamine pyrophosphorylase;UDP-N-acetylgalactosamine pyrophosphorylase;UDP-N-acetylglucosamine pyrophosphorylase	Uap1	9563700	0.264985
Q59J78	Q59J78	Mimitin, mitochondrial	Ndufaf2	137000000	3.39628
P47955;Q58E35;E9Q3T0	P47955;Q58E35	60S acidic ribosomal protein P1	Rplp1	137000000	0.530391
A2ABW8;Q9CQR2	A2ABW8;Q9CQR2	40S ribosomal protein S21	Rps21	143000000	0.457603
P43275;Q5SZ98	P43275;Q5SZ98	Histone H1.1	Hist1h1a	5840200	0.204914
Q91YR1;D3Z2H0	Q91YR1	Twinfilin-1	Twf1	37000000	0.359066
A2AV97;P10639	A2AV97;P10639	Thioredoxin	Txn1;Txn	205000000	0.388863
P21126;Q3UK94;F8WHM4	P21126;Q3UK94	Ubiquitin-like protein 4A	Ubl4a;Ubl4	487960	NaN
E9Q317;O55128;Q4FZH3;D3Z2N9;D3YY73;D3YY55	E9Q317;O55128;Q4FZH3;D3Z2N9;D3YY73	Histone deacetylase complex subunit SAP18	Gm10094;Sap18	5998500	0.459369
Q9D0L7;Q9D0L7-2;D3Z5T2	Q9D0L7;Q9D0L7-2;D3Z5T2	Armadillo repeat-containing protein 10	Armc10	2053700	NaN
Q9D1H7;Q9D1H7-2;D3Z4J5;D3Z7S0	Q9D1H7;Q9D1H7-2;D3Z4J5;D3Z7S0	Golgi to ER traffic protein 4 homolog	Get4	810470	0.243902
Q8BVU5;A2AH27;A2AH28	Q8BVU5	ADP-ribose pyrophosphatase, mitochondrial	Nudt9	16300000	1.24832
Q8R0A7;Q3TA40;Q8BQB5;D3YUS2	Q8R0A7;Q3TA40;Q8BQB5	Uncharacterized protein KIAA0513	Kiaa0513;6430548M08Rik	526210	NaN
Q8K0V4;F6YBV1;F6UAW9	Q8K0V4	CCR4-NOT transcription complex subunit 3	Cnot3	672720	0.154304
Q9DBS5;Q99JQ9	Q9DBS5	Kinesin light chain 4	Klc4	7357300	0.234968
P29351;P29351-3;G3UYY5;G3UXM2	P29351;P29351-3	Tyrosine-protein phosphatase non-receptor type 6	Ptpn6	2051300	0.166606
Q61081	Q61081	Hsp90 co-chaperone Cdc37	Cdc37	56200000	0.421745
A2AU35;Q8BHL8	A2AU35;Q8BHL8	Proteasome inhibitor PI31 subunit	Psmf1	9601200	1.73986
Q8R404	Q8R404	Protein QIL1	Qil1	182000000	2.94924
Q9DC51;A2AE31	Q9DC51	Guanine nucleotide-binding protein G(k) subunit alpha	Gnai3	261300	NaN
Q8K1M6-3;Q8K1M6-5	Q8K1M6-3			132000000	0.923361
P07742	P07742	Ribonucleoside-diphosphate reductase large subunit	Rrm1	191320	NaN
Q8C788;Q91ZR2	Q8C788;Q91ZR2	Sorting nexin-18	Snx18	466900	0.256141
A1L353;P82198;Q3UXJ2	A1L353;P82198;Q3UXJ2	Transforming growth factor-beta-induced protein ig-h3	Tgfbi	8666100	0.385609
P97431;E9Q377	P97431	Interferon regulatory factor 6	Irf6	0	NaN
B7ZNH7;Q80X19;Q80X19-2;F7D5Y4	B7ZNH7;Q80X19;Q80X19-2	Collagen alpha-1(XIV) chain	Col14a1	5658500	0.167406
Q8C878;Q3TL72;F6ZKU4;Q8C878-2	Q8C878;Q3TL72;F6ZKU4;Q8C878-2	NEDD8-activating enzyme E1 catalytic subunit	Uba3	11000000	0.489261
Q8C5L3;E9Q027;E9Q8D5;F8WGI0;Q8C5L3-2;Q8C5L3-3;H7BWX6;E9Q8R6;E9Q7M5	Q8C5L3;E9Q027;E9Q8D5;F8WGI0;Q8C5L3-2;Q8C5L3-3	CCR4-NOT transcription complex subunit 2	Cnot2	0	NaN
Q3TUQ5	Q3TUQ5		Pnn	4445900	0.293058
Q8BXZ1	Q8BXZ1	Protein disulfide-isomerase TMX3	Tmx3	2523500	0.311061
B1B0W8;P00493	B1B0W8;P00493	Hypoxanthine-guanine phosphoribosyltransferase	Hprt;Hprt1	14600000	0.264229
O89110;Q3U607	O89110;Q3U607	Caspase-8;Caspase-8 subunit p18;Caspase-8 subunit p10	Casp8	1933100	0.16692
P61294;Q0PD53	P61294;Q0PD53	Ras-related protein Rab-6B	Rab6b	9723000	0.5003
Q9D8S4	Q9D8S4	Oligoribonuclease, mitochondrial	Rexo2	35300000	0.747217
Q8BZ36;Q8BZ36-2	Q8BZ36;Q8BZ36-2	RAD50-interacting protein 1	Rint1	0	NaN
A7TU71;A2ALU4	A7TU71;A2ALU4	Protein Shroom2	Shroom2	53644	NaN
G5E897	G5E897		Kdelc2	2298400	0.326968
P62983;Q642L7	P62983;Q642L7	Ubiquitin-40S ribosomal protein S27a;Ubiquitin;40S ribosomal protein S27a	Rps27a	1370000000	1.32296
A2APY7;A2APY7-2	A2APY7	Probable methyltransferase C20orf7 homolog, mitochondrial		17000000	3.00725
A1L361;Q9WUN2	A1L361;Q9WUN2	Serine/threonine-protein kinase TBK1	Tbk1	1115400	0.418498
O55135;Q545K4;B1AZQ4;D6RJJ3;D6RG53	O55135;Q545K4	Eukaryotic translation initiation factor 6	Eif6	2345400	0.249339
Q80T06;Q91VK2;D3YY68;P57776;P57776-2;E9QN08;D3YUQ9;D3YZT9;D3Z7N2	Q80T06;Q91VK2;D3YY68;P57776;P57776-2;E9QN08;D3YUQ9	Elongation factor 1-delta	Eef1d	606000000	0.856091
P51174	P51174	Long-chain specific acyl-CoA dehydrogenase, mitochondrial	Acadl	4830000000	2.14018
Q8VCT3;E9PYF1	Q8VCT3;E9PYF1	Aminopeptidase B	Rnpep	2092400	0.15077
E9QKH0;Q80TV8;E9QNY9;Q80TV8-2;E9Q6L0	E9QKH0;Q80TV8;E9QNY9;Q80TV8-2;E9Q6L0	CLIP-associating protein 1	Clasp1	148490	NaN
G3X9V8;E9Q5D1;Q6UKZ0	G3X9V8		Serpinb3a	85101	NaN
B1AWM8;Q8BIL5;Q8BIL5-2;Q8BJ23	B1AWM8;Q8BIL5;Q8BIL5-2	Protein Hook homolog 1	Hook1	0	NaN
P97384;D3Z7U0	P97384;D3Z7U0	Annexin A11;Annexin	Anxa11	22700000	0.592207
E9QAS8;P35922;Q6AXB7;P35922-2;E9QAT0;P35922-3;P35922-6;P35922-4;P35922-5;E9QNF5;P35922-7;E9QAS9;P35922-8;P35922-9;P35922-12;P35922-10;P35922-11;D3Z6U8	E9QAS8;P35922;Q6AXB7;P35922-2;E9QAT0;P35922-3;P35922-6;P35922-4;P35922-5;E9QNF5;P35922-7;E9QAS9;P35922-8;P35922-9;P35922-12;P35922-10;P35922-11;D3Z6U8	Fragile X mental retardation protein 1 homolog	Fmr1	829910	0.480446
Q8JZX4;A2AP40	Q8JZX4	Splicing factor 45	Rbm17	5543400	0.477806
Q6ZPJ3	Q6ZPJ3	Ubiquitin-conjugating enzyme E2 O	Ube2o	580540	0.332237
A2AJX5;A6H8H2;E9Q449;F6WXD7	A2AJX5;A6H8H2;E9Q449		Dennd4c	86200000	4.33294
A2ASB2;Q9CY64;A2ASB1;A2ASB7;A2ASB8	A2ASB2;Q9CY64	Biliverdin reductase A	Blvra	19300000	0.456663
Q9D2N9	Q9D2N9	Vacuolar protein sorting-associated protein 33A	Vps33a	289710	NaN
Q3V307;Q6PD26;E9Q761	Q3V307;Q6PD26;E9Q761	GPI transamidase component PIG-S	Pigs	688780	0.1705
P17182;Q5FW97;Q6PHC1;B1ARR7;B1ARR6	P17182;Q5FW97;Q6PHC1	Alpha-enolase;Enolase	Eno1	1370000000	0.352846
Q7TPR4	Q7TPR4	Alpha-actinin-1	Actn1	3732700	0.190531
P32883-2;Q5J7N1;P32883;Q0VDV7	P32883-2;Q5J7N1;P32883;Q0VDV7	GTPase KRas;GTPase KRas, N-terminally processed	Kras	3810100	0.520318
A3KFW0;Q8BFY6	A3KFW0;Q8BFY6	Peflin	Pef1	2677400	0.219717
P62077	P62077	Mitochondrial import inner membrane translocase subunit Tim8 B	Timm8b	7966400	1.69251
Q6PGF7	Q6PGF7	Exocyst complex component 8	Exoc8	461500	0.165862
Q3U0B3	Q3U0B3	Dehydrogenase/reductase SDR family member 11	Dhrs11	7958800	1.36797
Q5SSZ5;Q5SSZ5-2	Q5SSZ5	Tensin-3	Tns3	998620	0.173723
Q9CY97;Q9CY97-2	Q9CY97;Q9CY97-2	RNA polymerase II subunit A C-terminal domain phosphatase SSU72	Ssu72	280630	NaN
P59999;E9PWA7	P59999;E9PWA7	Actin-related protein 2/3 complex subunit 4	Arpc4	30800000	0.310154
O35435;F6RI88;E9Q1V3;F6TCT7;D3YZY5;F6ZQJ5	O35435;F6RI88;E9Q1V3	Dihydroorotate dehydrogenase (quinone), mitochondrial	Dhodh	23400000	4.23747
Q9QZ88;D3Z645;Q9QZ88-2;D3YW98	Q9QZ88;D3Z645;Q9QZ88-2;D3YW98	Vacuolar protein sorting-associated protein 29	Vps29	92800000	1.16244
P14206;D3YTT7	P14206;D3YTT7	40S ribosomal protein SA	Rpsa;Rpsa-ps10	138000000	0.536625
P57784;G5E883	P57784	U2 small nuclear ribonucleoprotein A	Snrpa1	17800000	1.40548
P68368	P68368	Tubulin alpha-4A chain	Tuba4a	111000000	0.572377
E9QN52;Q91WK0;Q91WK0-2	E9QN52;Q91WK0;Q91WK0-2	Leucine-rich repeat flightless-interacting protein 2	Lrrfip2	2428100	NaN
O54946-2;O54946;G3X8S5;F6YRQ2	O54946-2;O54946;G3X8S5	DnaJ homolog subfamily B member 6	Dnajb6	16700000	0.829394
Q9DB15	Q9DB15	39S ribosomal protein L12, mitochondrial	Mrpl12	230000000	2.62041
G3X8X7;Q920Q4;E9Q2I5;A2BI90	G3X8X7;Q920Q4;E9Q2I5;A2BI90	Vacuolar protein sorting-associated protein 16 homolog	Vps16	0	NaN
Q52KI8;Q52KI8-2;E9PUK6;A2A8V9;A2A8V8;E9QKA4;A2A983;F6T4M4;F7BWM1	Q52KI8;Q52KI8-2;E9PUK6;A2A8V9;A2A8V8;E9QKA4;A2A983	Serine/arginine repetitive matrix protein 1	Srrm1	6107500	0.24561
P48428;Q5I0U7	P48428;Q5I0U7	Tubulin-specific chaperone A	Tbca	57700000	1.07629
O54692	O54692	Centromere/kinetochore protein zw10 homolog	Zw10	2849100	NaN
Q99KR7	Q99KR7	Peptidyl-prolyl cis-trans isomerase F, mitochondrial	Ppif	584000000	6.15839
Q9Z2I9	Q9Z2I9	Succinyl-CoA ligase [ADP-forming] subunit beta, mitochondrial	Sucla2	3980000000	2.24638
Q8C547;Q8C547-2;E9PYG1;Q8C547-3;Q8C547-4	Q8C547;Q8C547-2;E9PYG1;Q8C547-3	HEAT repeat-containing protein 5B	Heatr5b	128330	NaN
B1ATZ9;Q64444;F6ST32	B1ATZ9;Q64444;F6ST32	Carbonic anhydrase 4	Car4;Ca4	2164600	0.261213
Q99PL6;Q99PL6-2;B8JJA4	Q99PL6;Q99PL6-2;B8JJA4	UBX domain-containing protein 6	Ubxn6	27900000	1.72816
O88544;Q14AI7;F6QTS1;D3YV99;D3Z1R9;D6RG47	O88544;Q14AI7;F6QTS1;D3YV99	COP9 signalosome complex subunit 4	Cops4	103000000	0.93835
E9Q411;Q9D3Z9	E9Q411		Nbas	153800	0.211345
Q3URS9;Q3URS9-2	Q3URS9;Q3URS9-2	Coiled-coil domain-containing protein 51	Ccdc51	9719100	1.53751
B1AV40;O09111	B1AV40;O09111	NADH dehydrogenase [ubiquinone] 1 beta subcomplex subunit 11, mitochondrial	Ndufb11	128000000	2.36995
Q7TSS3;E9Q2Y3;O88522;Q8VC91;A3KG44;A3KG38;A3KG41;A3KG40;A3KG37;A3KG39	Q7TSS3;E9Q2Y3;O88522;Q8VC91;A3KG44;A3KG38;A3KG41	NF-kappa-B essential modulator	Ikbkg	1301200	0.558067
Q8BV13;D3Z6T8;D6RI85;D6RH36	Q8BV13;D3Z6T8;D6RI85;D6RH36	COP9 signalosome complex subunit 7b	Cops7b	1697700	0.302106
G3X8U3	G3X8U3		2210016F16Rik	16100000	0.459538
O70252;Q544R7;D3YX62;D3YXN4;D3Z4A2	O70252;Q544R7;D3YX62	Heme oxygenase 2	Hmox2	8554300	0.413428
P97379;Q3U541;P97379-2;Q542W3	P97379;Q3U541;P97379-2;Q542W3	Ras GTPase-activating protein-binding protein 2	G3bp2	10700000	0.584385
Q9WTI7;Q9WTI7-3;Q9WTI7-2;Q9WTI7-4;F8WIE8	Q9WTI7;Q9WTI7-3;Q9WTI7-2;Q9WTI7-4;F8WIE8	Unconventional myosin-Ic	Myo1c	16300000	0.190346
Q3U2G9;Q9QZ08;Q9D997;D3YXG2	Q3U2G9;Q9QZ08;Q9D997;D3YXG2	N-acetyl-D-glucosamine kinase	Nagk	8534900	0.501656
O89079;D3Z315;F6YFR7;F6XIG5;E9Q6I5	O89079;D3Z315;F6YFR7;F6XIG5	Coatomer subunit epsilon	Cope	11300000	0.275133
Q3UVL4;Q3UVL4-2;F6TKZ2;Q3UVL4-3;E0CX85	Q3UVL4;Q3UVL4-2	Protein fat-free homolog	Ffr	4194200	NaN
O88413	O88413	Tubby-related protein 3	Tulp3	2732600	NaN
Q3UIA2;Q3UIA2-2;E9QAJ9;Q3UIA2-3;Q3UIA2-4;F8WII2	Q3UIA2;Q3UIA2-2;E9QAJ9;Q3UIA2-3;Q3UIA2-4;F8WII2	Rho GTPase-activating protein 17	Arhgap17	1689000	0.226465
Q3U1V3;Q99MK8;Q7TS64;E9PW16;E9Q419;Q3UYH7;F6QY34;F7AEX1	Q3U1V3;Q99MK8;Q7TS64;E9PW16;E9Q419	Beta-adrenergic receptor kinase 1	Adrbk1	229030	0.125222
Q9CXI0	Q9CXI0	2-methoxy-6-polyprenyl-1,4-benzoquinol methylase, mitochondrial	Coq5	70200000	5.29101
G5E898;Q9R269	G5E898;Q9R269	Periplakin	Ppl	2457400	0.292031
G5E896;Q3UJB9;Q3UJB9-2;D6RE33	G5E896;Q3UJB9;Q3UJB9-2;D6RE33	Enhancer of mRNA-decapping protein 4	Edc4	0	NaN
A0MNP4;Q9ERF3;Q8BVQ0;F6U7Z8	A0MNP4;Q9ERF3;Q8BVQ0;F6U7Z8	WD repeat-containing protein 61	Wdr61	8305000	0.455332
P53994;Q0PD65	P53994;Q0PD65	Ras-related protein Rab-2A	Rab2a	14600000	0.248004
Q8R0H9	Q8R0H9	ADP-ribosylation factor-binding protein GGA1	Gga1	5208800	0.485272
Q8K2Q7;Q8K2Q7-2	Q8K2Q7	BRO1 domain-containing protein BROX	Brox	1125600	0.195641
O70251;G3UZ47;G3UX43	O70251	Elongation factor 1-beta	Eef1b	440000000	0.423424
Q5SWU9-2;E9PUB1;Q5SWU9	Q5SWU9-2;E9PUB1;Q5SWU9	Acetyl-CoA carboxylase 1;Biotin carboxylase	Acaca	40500000	0.136681
Q6A0C7;P35282;Q0PD35	Q6A0C7;P35282;Q0PD35	Ras-related protein Rab-21	Rab21	7846700	0.582581
E9PUQ5;Q921M4;Q921M4-2;A2AN46;A2AN44	E9PUQ5;Q921M4;Q921M4-2	Golgin subfamily A member 2	Golga2	16100000	0.293936
Q8C6I2;Q8C6I2-2;Q8C6I2-3	Q8C6I2;Q8C6I2-2;Q8C6I2-3	Succinate dehydrogenase assembly factor 2, mitochondrial	Sdhaf2	32600000	3.14693
A2RS53;Q9R0Q3;F6V6T4;E9PVS9;Q8BPI2	A2RS53;Q9R0Q3;F6V6T4	Transmembrane emp24 domain-containing protein 2	Tmed2	11700000	0.204453
G3X9G4;Q3TCR7;F8WIV5;G3UXX2	G3X9G4;Q3TCR7;F8WIV5		Dnm2	18400000	0.295229
Q9D8L3;Q3TVJ8;Q62186	Q9D8L3;Q3TVJ8;Q62186	Translocon-associated protein subunit delta	Ssr4	4746100	0.238686
F8WH69;Q09014	F8WH69;Q09014	Neutrophil cytosol factor 1	Ncf1	271490	NaN
Q80W47;D3YWK1	Q80W47;D3YWK1	WD repeat domain phosphoinositide-interacting protein 2	Wipi2	13300000	0.225882
E9PV58;Q99LG2	E9PV58;Q99LG2	Transportin-2	Tnpo2	352510	0.152226
Q7TNV0;D3YVJ6;E9Q8P4;E9Q8Y1	Q7TNV0	Protein DEK	Dek	3641900	0.288035
P47791;P47791-2;F6ZDD7	P47791;P47791-2;F6ZDD7	Glutathione reductase, mitochondrial	Gsr	34600000	0.210615
Q542D9;Q62351;Q8C872	Q542D9;Q62351;Q8C872	Transferrin receptor protein 1	Tfrc	215840	NaN
Q3UH60;D3Z5G8;Q3UH60-2;B2RQC7	Q3UH60;D3Z5G8;Q3UH60-2;B2RQC7	Disco-interacting protein 2 homolog B	Dip2b	0	NaN
Q9WTX8;Q9WTX8-2;Q3TDV6	Q9WTX8;Q9WTX8-2	Mitotic spindle assembly checkpoint protein MAD1	Mad1l1	14000000	0.814001
Q9CZ13;Q8K2S8	Q9CZ13;Q8K2S8	Cytochrome b-c1 complex subunit 1, mitochondrial	Uqcrc1	1560000000	2.55395
Q60I30;Q9D892	Q60I30;Q9D892	Inosine triphosphate pyrophosphatase	Itpa	20200000	0.495688
Q9CXW3	Q9CXW3	Calcyclin-binding protein	Cacybp	69500000	0.565131
F7DBH4;P98197;E9Q3G7;F6Z4J2;D6RII8	F7DBH4;P98197;E9Q3G7;F6Z4J2	Probable phospholipid-transporting ATPase IH	Atp11a	85400000	3.91497
Q9CYR6;Q8BWW3	Q9CYR6;Q8BWW3	Phosphoacetylglucosamine mutase	Pgm3	3054500	0.2602
Q9QXK7	Q9QXK7	Cleavage and polyadenylation specificity factor subunit 3	Cpsf3	290450	0.168725
E9QJY4;F8VQC7;Q61595-5;Q61595;E9QQ66;Q61595-6;Q61595-15;Q61595-9	E9QJY4;F8VQC7;Q61595-5;Q61595;E9QQ66;Q61595-6;Q61595-15;Q61595-9	Kinectin	Ktn1	4508600	0.803794
Q9R1Z7	Q9R1Z7	6-pyruvoyl tetrahydrobiopterin synthase	Pts	24200000	1.68965
Q9CR27;G3UWG7	Q9CR27;G3UWG7	WASH complex subunit CCDC53	Ccdc53	242380	NaN
O35864	O35864	COP9 signalosome complex subunit 5	Cops5	35900000	0.863707
Q9JLZ3;F6RT60;F6R307;Q9JLZ3-3;E9QMT1;Q9JLZ3-2;E9Q6L3	Q9JLZ3;F6RT60;F6R307	Methylglutaconyl-CoA hydratase, mitochondrial	Auh	340000000	2.18031
Q3UHD6;Q3UHD6-2;E9PW30	Q3UHD6;Q3UHD6-2;E9PW30	Sorting nexin-27	Snx27	3140200	0.15556
Q5QNT9;Q8CEC0;Q5QNU1;Q8CEC0-2;Q5QNU0;Q8CEC0-3	Q5QNT9;Q8CEC0;Q5QNU1;Q8CEC0-2;Q5QNU0;Q8CEC0-3	Nuclear pore complex protein Nup88	Nup88	54885	NaN
Q61033	Q61033	Lamina-associated polypeptide 2, isoforms alpha/zeta	Tmpo	397310	0.158305
Q5XKE0;F8WI34	Q5XKE0;F8WI34	Myosin-binding protein C, fast-type	Mybpc2	0	NaN
B2RXQ8;Q8BFQ4	B2RXQ8;Q8BFQ4	WD repeat-containing protein 82	Wdr82	2927600	0.239941
A3KGK6;Q8C166;B7ZCP4;E9Q806;A3KGK7;B7ZCP5;B7ZCP6;B7ZCP7;B7ZCP8	A3KGK6;Q8C166;B7ZCP4;E9Q806;A3KGK7;B7ZCP5;B7ZCP6;B7ZCP7	Copine-1	Cpne1	5649300	0.218136
Q9CQJ4;O35730;O35730-2;O35730-3	Q9CQJ4	E3 ubiquitin-protein ligase RING2	Rnf2	235410	NaN
O08740;Q6PI63;D3YZ20;D3YZ19	O08740;Q6PI63;D3YZ20;D3YZ19	DNA-directed RNA polymerase II subunit RPB11	Polr2j	212960	NaN
P54728;Q3TJ52	P54728;Q3TJ52	UV excision repair protein RAD23 homolog B	Rad23b	93300000	1.07819
O35218	O35218	Cleavage and polyadenylation specificity factor subunit 2	Cpsf2	781860	0.16619
Q8BH58	Q8BH58	TIP41-like protein	Tiprl	7294300	0.374111
Q3TEE8;Q91W90;E9PXX7	Q3TEE8;Q91W90;E9PXX7	Thioredoxin domain-containing protein 5	Txndc5	39800000	0.211064
Q8BQ46;E9Q6D4;F6QCI0	Q8BQ46;E9Q6D4;F6QCI0		Taf15	215000000	1.76757
G5E920;O54879;Q544R9;A2AP78	G5E920;O54879;Q544R9;A2AP78	High mobility group protein B3	Gm6104;Hmgb3	13300000	0.704821
P39054;P39054-2;Q3T9X3;G3UZZ3;G3UY64	P39054;P39054-2;Q3T9X3;G3UZZ3	Dynamin-2	Dnm2	1127000	0.261124
Q3TB24;Q9QYI5;Q9QYI5-2	Q3TB24;Q9QYI5;Q9QYI5-2	DnaJ homolog subfamily B member 2	Dnajb2	11600000	2.21951
O88545;Q3UIT2;D3Z0F5;F6QK86	O88545;Q3UIT2;D3Z0F5	COP9 signalosome complex subunit 6	Cops6	30100000	1.21874
P70297;Q3TQ49;Q3UGN9	P70297;Q3TQ49;Q3UGN9	Signal transducing adapter molecule 1	Stam	14000000	0.40517
Q8CHS8;Q8CHS8-3;Q8CHS8-2;E9Q256;E9Q7V5	Q8CHS8;Q8CHS8-3;Q8CHS8-2;E9Q256;E9Q7V5	Vacuolar protein sorting-associated protein 37A	Vps37a	414370	NaN
A2RT57;Q9CQC8;Q9CQC8-2	A2RT57;Q9CQC8;Q9CQC8-2	Maspardin	Spg21	99694	NaN
A2AE04;Q9QZD9;A2AE03	A2AE04;Q9QZD9;A2AE03	Eukaryotic translation initiation factor 3 subunit I	Eif3i	82800000	0.600312
Q4FK22;Q9DC16;F6SLP4	Q4FK22;Q9DC16	Endoplasmic reticulum-Golgi intermediate compartment protein 1	Ergic1	0	NaN
Q8CHP8	Q8CHP8	Phosphoglycolate phosphatase	Pgp	5190700	0.745768
P63242	P63242	Eukaryotic translation initiation factor 5A-1	Eif5a	353000000	0.54404
P45591;Q3UHW9	P45591;Q3UHW9	Cofilin-2	Cfl2	849000000	4.33971
Q64152;Q3UJR8;Q64152-2	Q64152;Q3UJR8;Q64152-2	Transcription factor BTF3	Btf3	89300000	1.12532
Q8VE88-2;Q8VE88	Q8VE88-2;Q8VE88	Protein FAM114A2	Fam114a2	6972800	0.558378
Q4FJY3;Q62313	Q4FJY3;Q62313	Trans-Golgi network integral membrane protein 1	Tgoln1	2058500	0.608606
B7ZNP2;Q3V4B5;B7ZNP3	B7ZNP2;Q3V4B5;B7ZNP3	COMM domain-containing protein 6	Commd6	8527200	0.859623
P61087;Q6ZWQ6;E9Q6W9;D3Z4U3;F8WIC2	P61087;Q6ZWQ6;E9Q6W9;D3Z4U3	Ubiquitin-conjugating enzyme E2 K	Ube2k	8138900	0.815594
O08738;Q3TPJ9	O08738;Q3TPJ9	Caspase-6;Caspase-6 subunit p18;Caspase-6 subunit p11	Casp6	4314400	0.163556
Q8CG72;Q8CG72-2	Q8CG72;Q8CG72-2	Poly(ADP-ribose) glycohydrolase ARH3	Adprhl2	8090400	0.453844
Q3TVN6;Q9Z126	Q3TVN6;Q9Z126	Platelet factor 4	Pf4	136000000	8.84486
Q3TPE9;Q3TPE9-2	Q3TPE9;Q3TPE9-2	Ankyrin repeat and MYND domain-containing protein 2	Ankmy2	702460	0.221249
Q8R035;A2A6T4;Q8R035-2	Q8R035;A2A6T4;Q8R035-2	Peptidyl-tRNA hydrolase ICT1, mitochondrial	Ict1	759800	NaN
P61079;P62838;Q3UT95;Q4QQL2	P61079;P62838;Q3UT95;Q4QQL2	Ubiquitin-conjugating enzyme E2 D3;Ubiquitin-conjugating enzyme E2 D2	Ube2d3;Ube2d2	0	NaN
Q9CQZ6	Q9CQZ6	NADH dehydrogenase [ubiquinone] 1 beta subcomplex subunit 3	Ndufb3	391000000	4.07864
Q6PHQ9;A3KFU8;A3KFU5;D3Z5M2;Q91YZ8;E9PW32;E9PVY5	Q6PHQ9;A3KFU8;A3KFU5;D3Z5M2;Q91YZ8;E9PW32		Pabpc4;Gm10110	40500000	0.750976
Q9Z2D0	Q9Z2D0	Myotubularin-related protein 9	Mtmr9	226910	0.14616
B1AVT9;Q9QXE7	B1AVT9;Q9QXE7	F-box-like/WD repeat-containing protein TBL1X	Tbl1x	9242000	0.445991
Q3U3H5;Q68FH4;Q8BUU7;Q3U728;B7ZCT3;B7ZCT4;B7ZCT5	Q3U3H5;Q68FH4;Q8BUU7;Q3U728	N-acetylgalactosamine kinase	Galk2	5193100	0.198997
Q8R5A6;Q8R5A6-2;E9QMS2	Q8R5A6;Q8R5A6-2	TBC1 domain family member 22A	Tbc1d22a	148030	NaN
Q3TVP5;Q3TVP5-2	Q3TVP5;Q3TVP5-2	Protein FAM105A	Fam105a	482010	NaN
Q3TIE8;O08749	Q3TIE8;O08749	Dihydrolipoyl dehydrogenase;Dihydrolipoyl dehydrogenase, mitochondrial	Dld	2430000000	1.70608
Q9DCZ4;B1ASQ2;Q9D186	Q9DCZ4;B1ASQ2;Q9D186	Apolipoprotein O	Apoo	102000000	NaN
P12815	P12815	Programmed cell death protein 6	Pdcd6	12200000	0.452386
E9QP99;P55937;P55937-1	E9QP99;P55937;P55937-1	Golgin subfamily A member 3	Golga3	6838600	0.480146
Q91WG0;D3YWM6	Q91WG0;D3YWM6		Ces2c;Ces2d-ps	7752400	0.131923
P48962;B2RTC8;Q3V132	P48962	ADP/ATP translocase 1	Slc25a4	3640000000	2.98891
Q3UMR5;Q3UMR5-2	Q3UMR5;Q3UMR5-2	Calcium uniporter protein, mitochondrial	Mcu	8344100	0.704374
Q9D706	Q9D706	RNA polymerase II-associated protein 3	Rpap3	438710	0.284835
Q6NXN1;A2AA85;Q6NXN1-2;A2AA86	Q6NXN1;A2AA85;Q6NXN1-2;A2AA86	UPF0485 protein C1orf144 homolog	D4Ertd22e	4895900	0.921744
O70172;Q544E3;F6RJE8	O70172;Q544E3	Phosphatidylinositol 5-phosphate 4-kinase type-2 alpha	Pip4k2a	467890	NaN
Q9CZR8;Q9CX33;D3Z4M7	Q9CZR8;Q9CX33	Elongation factor Ts, mitochondrial;Elongation factor Ts	Tsfm	54700000	1.67842
Q80UJ7	Q80UJ7	Rab3 GTPase-activating protein catalytic subunit	Rab3gap1	371430	0.121852
P68037;Q561N4;D3YZS3	P68037;Q561N4;D3YZS3	Ubiquitin-conjugating enzyme E2 L3	Ube2l3	161000000	0.848464
Q8VH51;Q3U313;Q8VH51-2;E9Q8F0;Q0VGU9;Q8VH51-3;F7AA45;B7ZD61;B7ZD63;D6RJ85;E9Q999;D6RCZ8;E9PZF9;B7ZD64	Q8VH51;Q3U313;Q8VH51-2;E9Q8F0;Q0VGU9;Q8VH51-3	RNA-binding protein 39	Rbm39	2326800	0.186863
P61620;A2ATT8;Q9JLR1;Q9CYJ6;A2ATT9	P61620;A2ATT8;Q9JLR1;Q9CYJ6	Protein transport protein Sec61 subunit alpha isoform 1;Protein transport protein Sec61 subunit alpha isoform 2	Sec61a1;Sec61a2	722790	NaN
Q8K274	Q8K274	Ketosamine-3-kinase	Fn3krp	11700000	0.608347
E9QP62;E9Q4A6;Q99JW4;Q9D7B2	E9QP62;E9Q4A6;Q99JW4;Q9D7B2	LIM and senescent cell antigen-like-containing domain protein 1	Lims1	15600000	0.667601
E9Q762;Q1HL32;Q9CW03	E9Q762;Q1HL32;Q9CW03	Structural maintenance of chromosomes protein 3	Smc3	22600000	0.285984
Q91VM5;Q9DAE2	Q91VM5	RNA binding motif protein, X-linked-like-1;RNA binding motif protein, X-linked-like-1, N-terminally processed	Rbmxl1	4936700	0.60868
P48036	P48036	Annexin A5	Anxa5	602000000	0.805153
Q91W86	Q91W86	Vacuolar protein sorting-associated protein 11 homolog	Vps11	252340	0.199692
Q3U0T9;Q6PHN9	Q3U0T9;Q6PHN9	Ras-related protein Rab-35	Rab35	3043700	0.32112
Q3U9G9	Q3U9G9	Lamin-B receptor	Lbr	0	NaN
Q8R0G9	Q8R0G9	Nuclear pore complex protein Nup133	Nup133	725220	0.486855
Q6ZQ61;Q5BL18;Q8K310	Q6ZQ61;Q5BL18;Q8K310	Matrin-3	Matr3	45800000	0.479088
P62858;Q059I1;D3YVD9;G3UYV7	P62858;Q059I1;D3YVD9;G3UYV7	40S ribosomal protein S28	Rps28;Gm3511	56600000	0.65505
Q9DC48;Q6P8J8	Q9DC48	Pre-mRNA-processing factor 17	Cdc40	0	NaN
Q9DC23	Q9DC23	DnaJ homolog subfamily C member 10	Dnajc10	671870	NaN
Q80X90	Q80X90	Filamin-B	Flnb	135000000	0.196082
Q3UDE2	Q3UDE2	Tubulin--tyrosine ligase-like protein 12	Ttll12	2734300	0.19775
Q99K70;Q99K70-2	Q99K70	Ras-related GTP-binding protein C	Rragc	2281400	0.208598
Q99JR8;Q99JR8-2;G3UXC0	Q99JR8;Q99JR8-2	SWI/SNF-related matrix-associated actin-dependent regulator of chromatin subfamily D member 2	Smarcd2	1282600	0.188062
E9QAS7;Q7TNC9;Q3TZT4	E9QAS7;Q7TNC9;Q3TZT4		Inpp5a	2682200	0.442929
A2A846;Q9DCS3;A2A845	A2A846;Q9DCS3	Trans-2-enoyl-CoA reductase, mitochondrial	Mecr	28800000	0.415265
D3Z285	D3Z285		Nfu1	25400000	5.18538
Q8R2U0;Q8R2U0-2	Q8R2U0;Q8R2U0-2	Nucleoporin SEH1	Seh1l	380920	NaN
Q923F1	Q923F1		Clns1a	539510	0.464619
O88792;Q8VC39	O88792;Q8VC39	Junctional adhesion molecule A	F11r	2036800	NaN
Q9ERG0;Q8CD09;Q9ERG0-2	Q9ERG0;Q8CD09;Q9ERG0-2	LIM domain and actin-binding protein 1	Lima1	10400000	0.225999
A4FUJ3;O35367;E9PVH7	A4FUJ3;O35367;E9PVH7	Keratocan	Kera	7414300	0.170885
Q69ZK0	Q69ZK0	Phosphatidylinositol 3,4,5-trisphosphate-dependent Rac exchanger 1 protein	Prex1	18147	NaN
Q9CQ40;Q8BTB8	Q9CQ40;Q8BTB8	39S ribosomal protein L49, mitochondrial	Mrpl49	43600000	3.24034
Q3UI43	Q3UI43	BRISC and BRCA1-A complex member 1	Babam1	0	NaN
Q922I7;Q8BGJ5;Q8CB58;E9Q4L8;P17225;E9QMW9;Q8C2R5;F7AXP1;F7DCW4;E9Q279;E9PZ39;E9Q0W3	Q922I7;Q8BGJ5;Q8CB58;E9Q4L8;P17225;E9QMW9;Q8C2R5	Polypyrimidine tract-binding protein 1	Ptbp1	38700000	0.261643
Q8JZS0;Q3TUM0	Q8JZS0;Q3TUM0	Protein lin-7 homolog A	Lin7a	5608400	0.396354
A2AH85;O08810;Q543F1;G3UZ34;G3UZ25;G3UXK8	A2AH85;O08810;Q543F1;G3UZ34	116 kDa U5 small nuclear ribonucleoprotein component	Eftud2	3852100	0.117754
D3YUP1;Q9WVG6;Q9WVG6-2	D3YUP1;Q9WVG6;Q9WVG6-2	Histone-arginine methyltransferase CARM1	Carm1	1182500	0.271179
B9EIE9;P46664	B9EIE9;P46664	Adenylosuccinate synthetase;Adenylosuccinate synthetase isozyme 2	Adss	12000000	0.199064
A2AA49;P27601;Q9D034	A2AA49;P27601	Guanine nucleotide-binding protein subunit alpha-13	Gna13	785450	0.128258
P24815;Q3UI20;A2AEP8;A2AEP7	P24815;Q3UI20;A2AEP8	3 beta-hydroxysteroid dehydrogenase/Delta 5-->4-isomerase type 1;3-beta-hydroxy-Delta(5)-steroid dehydrogenase;Steroid Delta-isomerase	Hsd3b1	2697800	0.20088
Q99NB8	Q99NB8	Ubiquilin-4	Ubqln4	6480500	0.840619
B2RSV4;Q921M3;F8WHW1;Q921M3-2	B2RSV4;Q921M3;F8WHW1;Q921M3-2	Splicing factor 3B subunit 3	Sf3b3	11300000	0.233449
Q80VP1-2;Q80VP1;D3Z4V3	Q80VP1-2;Q80VP1	Epsin-1	Epn1	32500000	0.539113
Q3TPX4;E9PZ92;E0CYX2	Q3TPX4;E9PZ92	Exocyst complex component 5	Exoc5	0	NaN
P60335;P57724	P60335	Poly(rC)-binding protein 1	Pcbp1	42200000	0.296182
P54822;E9Q242;E9Q3T7;E9Q0A0	P54822;E9Q242;E9Q3T7	Adenylosuccinate lyase	Adsl	13100000	0.421692
B9EI85;P84228;F8WI35;E9PZA5	B9EI85;P84228;F8WI35	Histone H3;Histone H3.2	Hist2h3b;Hist1h3b;H3f3a	0	NaN
A2RS22;Q9WUM3;D3YUG6	A2RS22;Q9WUM3	Coronin-1B	Coro1b	5378900	0.227361
D3YX87;E9PUB7;Q2YDW2;Q2YDW2-2	D3YX87;E9PUB7;Q2YDW2;Q2YDW2-2	Protein misato homolog 1	Msto1	29723	NaN
Q8R2K3;Q9CYR0	Q8R2K3;Q9CYR0	Single-stranded DNA-binding protein, mitochondrial	Ssbp1	62700000	2.24659
Q9CQX6	Q9CQX6		Gm16286	1451300	0.489932
E9PYM9;P70336-2;F8VPK5;P70336;E9Q9W8	E9PYM9;P70336-2;F8VPK5;P70336;E9Q9W8	Rho-associated protein kinase 2	Rock2	29600000	1.41098
Q78ZM0;D3Z6Z0;O70492;D3Z789	Q78ZM0;D3Z6Z0;O70492;D3Z789	Sorting nexin-3	Snx3	72200000	0.796052
Q8BFQ8	Q8BFQ8	Parkinson disease 7 domain-containing protein 1	Pddc1	395290	0.238983
Q9D7N9	Q9D7N9	Adipocyte plasma membrane-associated protein	Apmap	13800000	0.271879
O08997	O08997	Copper transport protein ATOX1	Atox1	122000000	0.814531
G3UWS4;H3BKU1;Q3TTF6;H3BLE7;Q7TNP2;H3BIV7;H3BLQ0	G3UWS4;H3BKU1;Q3TTF6;H3BLE7;Q7TNP2;H3BIV7;H3BLQ0	Serine/threonine-protein phosphatase 2A 65 kDa regulatory subunit A beta isoform	Ppp2r1b	27000000	1.32927
Q9ERR7	Q9ERR7	15 kDa selenoprotein	2020-09-15	11900000	0.545583
Q91WJ4;O88958;D3Z0R5	Q91WJ4;O88958	Glucosamine-6-phosphate isomerase 1	Gnpda1	14500000	0.32532
Q80ZX0	Q80ZX0		Sec24b	635520	0.169334
P83741-3;P83741-2;P83741;P83741-5;F8WHP4;P83741-4;P83741-6;F7CZC4;F7CC62;F6U2S8	P83741-3;P83741-2;P83741;P83741-5;F8WHP4;P83741-4;P83741-6	Serine/threonine-protein kinase WNK1	Wnk1	343940	NaN
Q5SXR6;Q68FD5	Q5SXR6;Q68FD5	Clathrin heavy chain 1	Cltc	146000000	0.140027
Q3U706;Q91XC8	Q3U706;Q91XC8	Death-associated protein 1	Dap	6477600	0.269259
Q8CIV8;E0CZ81	Q8CIV8;E0CZ81	Tubulin-specific chaperone E	Tbce	469260	0.214257
E9Q0K1;P58021;Q542E4;E9PZ69	E9Q0K1;P58021;Q542E4	Transmembrane 9 superfamily member 2	Tm9sf2	192430	NaN
Q497N0;Q61390;B1AT05	Q497N0;Q61390;B1AT05	T-complex protein 1 subunit zeta-2	Cct6b	2153100	NaN
P34884;Q545F0	P34884;Q545F0	Macrophage migration inhibitory factor	Mif	43200000	0.723694
Q4LDD4;Q4LDD4-2;Q4LDD4-3;F6XBJ8;D3YWW7	Q4LDD4;Q4LDD4-2;Q4LDD4-3;F6XBJ8	Arf-GAP with Rho-GAP domain, ANK repeat and PH domain-containing protein 1	Arap1	966170	0.543537
E9Q8Z8;E9Q8Z6;P30999;G3X9V2;E9Q904;E9Q901;D3Z2H2;E9Q8Z9;E9Q8Z4;E9Q905;E9Q907;D3Z7H6;E9Q986;D3Z2H7	E9Q8Z8;E9Q8Z6;P30999;G3X9V2;E9Q904;E9Q901;D3Z2H2;E9Q8Z9;E9Q8Z4;E9Q905;E9Q907;D3Z7H6;E9Q986;D3Z2H7	Catenin delta-1	Ctnnd1	9135800	0.312969
Q91X78	Q91X78	Erlin-1	Erlin1	257660	NaN
Q5F1Z8;Q60648	Q5F1Z8;Q60648	Ganglioside GM2 activator	Gm2a	5168300	0.197867
Q99MR6;Q99MR6-2;Q99MR6-4;Q99MR6-3	Q99MR6;Q99MR6-2;Q99MR6-4;Q99MR6-3	Serrate RNA effector molecule homolog	Srrt	4651400	0.316857
B8QI33;B2RXW8	B8QI33;B2RXW8		Ppfia1	0	NaN
A2ADS0;Q9ER00	A2ADS0;Q9ER00	Syntaxin-12	Stx12	11700000	0.371955
Q8VE11	Q8VE11	Myotubularin-related protein 6	Mtmr6	75866	NaN
Q569Z5;F8WHR6;Q569Z5-2;F8WIZ2	Q569Z5;F8WHR6;Q569Z5-2	Probable ATP-dependent RNA helicase DDX46	Ddx46	799380	0.193986
Q91YT0;D3YUM1;D6RG60	Q91YT0;D3YUM1	NADH dehydrogenase [ubiquinone] flavoprotein 1, mitochondrial	Ndufv1	475000000	1.1415
Q8C0L8	Q8C0L8	Conserved oligomeric Golgi complex subunit 5	Cog5	830590	0.366771
Q3TIX6;A2AJ72;A2AJ71	Q3TIX6;A2AJ72		Fubp3	5884400	0.284868
P43274	P43274	Histone H1.4	Hist1h1e	1292100	0.321937
Q3UJ95;Q80XI4	Q3UJ95;Q80XI4	Phosphatidylinositol 5-phosphate 4-kinase type-2 beta	Pip4k2b	2782900	0.273755
P08030;Q6PK77	P08030;Q6PK77	Adenine phosphoribosyltransferase	Aprt	9184400	0.466788
P62137;Q3TYF5	P62137;Q3TYF5	Serine/threonine-protein phosphatase PP1-alpha catalytic subunit;Serine/threonine-protein phosphatase	Ppp1ca	6131100	0.182849
Q80Y14	Q80Y14	Glutaredoxin-related protein 5, mitochondrial	Glrx5	142000000	3.72703
Q9CX00;Q8BHC2	Q9CX00;Q8BHC2	IST1 homolog	Ist1;2400003C14Rik	6164100	0.366072
Q3UD32;O70370	Q3UD32;O70370	Cathepsin S	Ctss	0	NaN
Q8C0J6	Q8C0J6	Ankyrin repeat domain-containing protein SOWAHC	Sowahc	0	NaN
A2RS68;Q62376;Q62376-2;Q6ZWP0	A2RS68;Q62376;Q62376-2;Q6ZWP0	U1 small nuclear ribonucleoprotein 70 kDa	Snrnp70	52700000	0.658805
P97376;Q78P92	P97376;Q78P92	Protein FRG1	Frg1	481420	NaN
P24472	P24472	Glutathione S-transferase A4	Gsta4	159000000	1.00123
Q9JJF9	Q9JJF9	Signal peptide peptidase-like 2A	Sppl2a	0	NaN
E9Q6J5;Q80TF0	E9Q6J5		Bod1l	94637	NaN
Q8JZN7;F8WJL2;H3BKJ1;H3BL14	Q8JZN7;F8WJL2;H3BKJ1	Mitochondrial Rho GTPase 2	Rhot2	796190	0.549692
E9QNX3;A2AMI2;A2AMI7	E9QNX3;A2AMI2;A2AMI7		Eif4g3	815000000	0.624805
Q3U489;Q9WUR9;F8WH88;A2ARF6;F6TEU8;A2ARF5	Q3U489;Q9WUR9;F8WH88;A2ARF6	Adenylate kinase isoenzyme 4, mitochondrial	Ak4	57200000	1.17845
Q921T2;E9PZE1;Q921T2-2;Q921T2-3;F6YC07;E9PWW2	Q921T2;E9PZE1;Q921T2-2;Q921T2-3;F6YC07;E9PWW2	Torsin-1A-interacting protein 1	Tor1aip1	0	NaN
P62821;Q0PD67;H7BX41;D3YX72;D3Z5G6	P62821;Q0PD67;H7BX41;D3YX72;D3Z5G6	Ras-related protein Rab-1A	Rab1A;Rab1	69600000	0.291511
G3X9J4;Q148V7;E9QM90;Q148V7-2;Q148V7-3	G3X9J4;Q148V7;E9QM90;Q148V7-2;Q148V7-3	LisH domain and HEAT repeat-containing protein KIAA1468	2310035C23Rik;Kiaa1468	399030	0.185505
Q8C1D8;Q8C1D8-2	Q8C1D8	Protein IWS1 homolog	Iws1	185230	NaN
Q62425	Q62425	NADH dehydrogenase [ubiquinone] 1 alpha subcomplex subunit 4	Ndufa4	1880000000	9.02364
Q91VH2;E9QNH3	Q91VH2;E9QNH3	Sorting nexin-9	Snx9	9528900	0.170407
P51163;Q3UG55;Q3TPL3	P51163;Q3UG55;Q3TPL3	Uroporphyrinogen-III synthase	Uros	4270700	NaN
Q68EF0	Q68EF0	Rab-3A-interacting protein	Rab3ip	1965100	0.463607
E9QMQ3;Q99KW3-1;Q99KW3-2;Q99KW3;Q99KW3-4;G5E8W1	E9QMQ3;Q99KW3-1;Q99KW3-2;Q99KW3;Q99KW3-4	TRIO and F-actin-binding protein	Triobp	3357500	0.471743
Q3UE37	Q3UE37	Ubiquitin-conjugating enzyme E2 Z	Ube2z	1945100	0.34229
Q52L50;Q99JI6	Q52L50;Q99JI6	Ras-related protein Rap-1b	Rap1b	27000000	0.379233
P48722;P48722-2;E0CY23;F6SMW7;F6TFH3	P48722;P48722-2;E0CY23	Heat shock 70 kDa protein 4L	Hspa4l	17400000	0.381417
Q8C2Q3;E9Q205;Q8C2Q3-2;E9QL13;E9PXP4;B0LM42	Q8C2Q3;E9Q205;Q8C2Q3-2;E9QL13;E9PXP4	RNA-binding protein 14	Rbm14	2310200	0.504414
Q91VI7	Q91VI7	Ribonuclease inhibitor	Rnh1	33300000	0.554754
A2AKB1;P61965;F6Q3W0	A2AKB1;P61965;F6Q3W0	WD repeat-containing protein 5	Wdr5	0	NaN
O35381;D3Z7M9;D3YYE1;F6UFG6;Q64G17	O35381;D3Z7M9;D3YYE1;F6UFG6	Acidic leucine-rich nuclear phosphoprotein 32 family member A	Anp32a	129000000	0.418813
P41241;E9QJV6;P41242-2;P41242;D3Z4T5;P41242-3;D6RGA0;D3YVQ8	P41241	Tyrosine-protein kinase CSK	Csk	609920	0.164403
A2AN96;O88851	A2AN96;O88851	Putative hydrolase RBBP9	Rbbp9	38800000	0.39557
Q8BU14	Q8BU14	Translocation protein SEC62	Sec62	308970	0.317844
Q99LR1;D6RFU2	Q99LR1	Monoacylglycerol lipase ABHD12	Abhd12	0	NaN
F8WJ93;Q3UMY5;Q3UMY5-3;Q3UMY5-2;Q3UMY5-4	F8WJ93;Q3UMY5;Q3UMY5-3;Q3UMY5-2;Q3UMY5-4	Echinoderm microtubule-associated protein-like 4	Eml4	246260	0.116955
Q3THS6;Q99J57;F8WJ09;E9Q0D0;Q6PE05	Q3THS6;Q99J57;F8WJ09;E9Q0D0	S-adenosylmethionine synthase isoform type-2;S-adenosylmethionine synthase	Mat2a	6104900	0.282358
Q5SQA3;Q5SQA2;Q62440;E9QM63;Q62440-2;E9QM64;Q62440-3;Q5SQA4;E9QKN2;Q62440-4;Q62441;Q62440-5;Q80TG4;E9QM62;Q62440-6;Q62440-7;Q62440-8;E9Q2Q6;Q5SQA7	Q5SQA3;Q5SQA2;Q62440;E9QM63;Q62440-2;E9QM64;Q62440-3;Q5SQA4;E9QKN2;Q62440-4;Q62441;Q62440-5;Q80TG4;E9QM62;Q62440-6	Transducin-like enhancer protein 1;Transducin-like enhancer protein 4	Tle1;Tle4	0	NaN
P42337;D3YY41	P42337;D3YY41	Phosphatidylinositol 4,5-bisphosphate 3-kinase catalytic subunit alpha isoform	Pik3ca	7586500	NaN
Q3UMA3;Q99LI8;E9PYT7;B1ATZ1;B1ATZ0;B1ATY9;F6VV02	Q3UMA3;Q99LI8;E9PYT7;B1ATZ1;B1ATZ0;B1ATY9	Hepatocyte growth factor-regulated tyrosine kinase substrate	Hgs	7740600	0.447607
Q8VD75;E9Q4E3	Q8VD75	Huntingtin-interacting protein 1	Hip1	75127	NaN
Q9D2R6;E9Q6W2	Q9D2R6;E9Q6W2	Coiled-coil domain-containing protein 56	Ccdc56	8935900	1.07594
P54841	P54841	Transcription factor MafB	Mafb	7859000	1.26537
P97855;Q5NCU1;Q3UR88	P97855;Q5NCU1;Q3UR88	Ras GTPase-activating protein-binding protein 1	G3bp1	48000000	0.68334
D2KHZ9;P16858;E9PX72;E9Q1S8;E9Q9E5;E9Q0E3;E9Q5U3;F8WJL5;D3YUV0;E9PXL6;E9PZL2;F6ZQM8;D3YV03;D3YYI5;D3YU05;E9Q1F8;F6UT49	D2KHZ9;P16858;E9PX72;E9Q1S8;E9Q9E5;E9Q0E3;E9Q5U3;F8WJL5;D3YUV0;E9PXL6;E9PZL2;F6ZQM8;D3YV03;D3YYI5	Glyceraldehyde-3-phosphate dehydrogenase	Gapdh;Gm5559;Gm4609;Gm10481;Gm10293;Gm10358;Gm10291;Gm3200;Gm10327;Gm3222;Gm10290;Gm7293	4800000000	0.976849
Q4VAA9;Q8BP48	Q4VAA9;Q8BP48	Methionine aminopeptidase;Methionine aminopeptidase 1	Metap1	2377400	0.491739
Q8R409	Q8R409	Protein HEXIM1	Hexim1	1410300	0.34528
Q99LL5;E9QAL6	Q99LL5	Periodic tryptophan protein 1 homolog	Pwp1	436930	NaN
O08796;Q3UWZ1;F6ZEU2	O08796;Q3UWZ1	Eukaryotic elongation factor 2 kinase	Eef2k	0	NaN
Q8BGR9;Q8BGR9-2	Q8BGR9;Q8BGR9-2	Ubiquitin-like domain-containing CTD phosphatase 1	Ublcp1	1564700	0.301196
E9Q3B5;P62876	E9Q3B5;P62876	DNA-directed RNA polymerases I, II, and III subunit RPABC5	Gm10774;Polr2l	412910	NaN
P39447;B9EHJ3	P39447;B9EHJ3	Tight junction protein ZO-1	Tjp1	26700000	0.520752
Q91WD5;D3YXT0;F6RJ83	Q91WD5;D3YXT0	NADH dehydrogenase [ubiquinone] iron-sulfur protein 2, mitochondrial	Ndufs2	128000000	0.955201
Q78JW9;E9QB07	Q78JW9;E9QB07	Ubiquitin domain-containing protein UBFD1	Ubfd1	9557300	0.597015
Q8R3I3;Q8BRB0	Q8R3I3;Q8BRB0	Conserved oligomeric Golgi complex subunit 6	Cog6	11300000	1.45052
C7G3P2;Q61136	C7G3P2;Q61136	Serine/threonine-protein kinase PRP4 homolog	Prpf4b	0	NaN
B1ASW6;Q14BF8;Q5NCF2;B1ASW5	B1ASW6;Q14BF8;Q5NCF2;B1ASW5	Trafficking protein particle complex subunit 1	Trappc1	914290	0.251731
Q921F4;F6SB69;Q921F4-4;Q921F4-5	Q921F4;F6SB69	Heterogeneous nuclear ribonucleoprotein L-like	Hnrpll	3852600	0.16905
Q3U125;Q9CYH2;D3Z398;D3YYG8;D3Z0A8;D3YWL4;D3Z143	Q3U125;Q9CYH2;D3Z398;D3YYG8	Redox-regulatory protein FAM213A	5730469M10Rik;Fam213a	16500000	0.386429
Q7TPD0;Q7TPD0-2	Q7TPD0	Integrator complex subunit 3	Ints3	1954900	0.137694
A2AN37;P52623;F7CBX2	A2AN37;P52623	Uridine kinase;Uridine-cytidine kinase 1	Uck1	204620	NaN
Q3UGC7	Q3UGC7		Eif3j	160000000	1.14945
Q8K2T1;D3YU12;G5E8S7;Q8K2T1-2;Q8K2T1-3	Q8K2T1;D3YU12;G5E8S7;Q8K2T1-2	NmrA-like family domain-containing protein 1	Nmral1	5869700	1.17608
G5E8I8;Q8CGZ0	G5E8I8;Q8CGZ0	Calcium homeostasis endoplasmic reticulum protein	Cherp	1542800	0.188469
Q8CGY8;Q8CGY8-2	Q8CGY8;Q8CGY8-2	UDP-N-acetylglucosamine--peptide N-acetylglucosaminyltransferase 110 kDa subunit	Ogt	16900000	0.199426
P97765;Q544A1;A2A860;E9Q1S7	P97765;Q544A1;A2A860;E9Q1S7	WW domain-binding protein 2	Wbp2	9117900	0.521921
Q6P2B1-2;Q6P2B1;Q6P2B1-3;E9PWA5;E9Q0H8;F6TDZ2	Q6P2B1-2;Q6P2B1	Transportin-3	Tnpo3	216440	NaN
Q6PGL7;E9PY74;Q6PGL7-2	Q6PGL7;E9PY74;Q6PGL7-2	WASH complex subunit FAM21	Fam21;D6Wsu116e	185290	0.242454
H7BXA7;D3YYS6;E9Q3B9;O35678;Q3UFN1;O35678-2	H7BXA7;D3YYS6;E9Q3B9;O35678;Q3UFN1	Monoglyceride lipase	Mgll	14600000	0.592171
Q3U741;Q501J6;Q501J6-2	Q3U741;Q501J6;Q501J6-2	Probable ATP-dependent RNA helicase DDX17	Ddx17	4149900	0.296806
B2RSU7;Q8CHG3;E9PWI6;E0CYI9;F6UT01;E0CY89;E0CX24	B2RSU7;Q8CHG3;E9PWI6;E0CYI9	GRIP and coiled-coil domain-containing protein 2	Gcc2	1442200	0.138284
Q4KL82;Q9WUK4	Q4KL82;Q9WUK4	Replication factor C subunit 2	Rfc2	81561	NaN
Q9JHU4;F6ZX84	Q9JHU4	Cytoplasmic dynein 1 heavy chain 1	Dync1h1	56900000	0.248188
A2AH38;Q9Z0W3;Q9Z0W3-2	A2AH38;Q9Z0W3;Q9Z0W3-2	Nuclear pore complex protein Nup160	Nup160	259780	NaN
A2AWN9;P59326;A2AWN8;A2AWN7	A2AWN9;P59326;A2AWN8	YTH domain family protein 1	Ythdf1	4037400	0.448813
Q5XJY5	Q5XJY5	Coatomer subunit delta	Arcn1	31500000	0.241885
P61290;Q4FK54;A2A4J1;A2A4J3	P61290;Q4FK54;A2A4J1;A2A4J3	Proteasome activator complex subunit 3	Psme3	3820700	0.334795
Q545N8;Q9Z2M7	Q545N8;Q9Z2M7	Phosphomannomutase 2	Pmm2	34400000	0.368487
P62071	P62071	Ras-related protein R-Ras2	Rras2	5516300	0.883392
Q64012;A2AU62;Q3U3F6;Q64012-2;A2AU61;A2AU60	Q64012;A2AU62;Q3U3F6;Q64012-2;A2AU61;A2AU60	RNA-binding protein Raly	Raly;C130057N11Rik	3341300	NaN
Q9CQV1	Q9CQV1	Mitochondrial import inner membrane translocase subunit TIM16	Pam16	12700000	12.0385
Q925E7;F6RV17;G3UXS9	Q925E7;F6RV17	Serine/threonine-protein phosphatase 2A 55 kDa regulatory subunit B delta isoform	Ppp2r2d	1960300	0.759417
A2AWP8;A2AWP8-4;A2AWP8-2;A2AWP8-3;A2AWP6;A2AWP8-5;F6S3V7;A2AWP4;F6ZH54	A2AWP8;A2AWP8-4;A2AWP8-2;A2AWP8-3;A2AWP6;A2AWP8-5;F6S3V7;A2AWP4	Rho guanine nucleotide exchange factor 10-like protein	Arhgef10l	0	NaN
Q810A7;Q810A7-2	Q810A7;Q810A7-2	ATP-dependent RNA helicase DDX42	Ddx42	2745500	0.270132
Q9R0Q6;D3YVI5	Q9R0Q6	Actin-related protein 2/3 complex subunit 1A	Arpc1a	44800000	0.529914
P17426;P17426-2;F6TPX8	P17426;P17426-2	AP-2 complex subunit alpha-1	Ap2a1	5577100	0.195423
A2A4H7;Q02257	A2A4H7;Q02257	Junction plakoglobin	Jup	36700000	0.624259
Q8BJY1;F7BA91	Q8BJY1	26S proteasome non-ATPase regulatory subunit 5	Psmd5	10800000	0.750864
Q5M9P7;Q9CR86	Q5M9P7;Q9CR86	Calcium-regulated heat stable protein 1	Carhsp1	23200000	0.593754
P63073;Q3TK95	P63073;Q3TK95	Eukaryotic translation initiation factor 4E	Eif4e	38900000	0.471631
Q3UCW0;Q61187;D3Z0S9;D3Z2V5	Q3UCW0;Q61187	Tumor susceptibility gene 101 protein	Tsg101	2544700	0.453227
Q8R1U1;G3UWH9;Q7TSQ9;G3UWX2;G3XA67;G3UYW8	Q8R1U1;G3UWH9;Q7TSQ9	Conserved oligomeric Golgi complex subunit 4	Cog4	540000	NaN
Q99LX0;A2A813;A2A815;A2A816;A2A817	Q99LX0;A2A813;A2A815	Protein DJ-1	Park7	1350000000	1.37314
P15532;Q5NC81;Q5NC80	P15532;Q5NC81;Q5NC80	Nucleoside diphosphate kinase A;Nucleoside diphosphate kinase	Nme1	12400000	0.332193
A2AHZ8;Q8C4Y3;F6SWS9	A2AHZ8;Q8C4Y3	Negative elongation factor B	Cobra1	613370	0.131994
E9QNE9;Q99JP0	E9QNE9;Q99JP0	Mitogen-activated protein kinase kinase kinase kinase 3	Map4k3	0	NaN
Q9DC69	Q9DC69	NADH dehydrogenase [ubiquinone] 1 alpha subcomplex subunit 9, mitochondrial	Ndufa9	115000000	1.45087
Q91ZE0	Q91ZE0	Trimethyllysine dioxygenase, mitochondrial	Tmlhe	472810	NaN
E9Q5C9	E9Q5C9		Nolc1	1032100	0.532481
P49962;Q5EAT0;D3YZX8	P49962;Q5EAT0;D3YZX8	Signal recognition particle 9 kDa protein	Srp9	6284300	0.545078
Q8BGW1;Q8BGW1-2;Q8BGW1-3;Q8BGW1-4;E9Q1E4;D3Z127	Q8BGW1;Q8BGW1-2;Q8BGW1-3;Q8BGW1-4;E9Q1E4;D3Z127	Alpha-ketoglutarate-dependent dioxygenase FTO	Fto	44702	NaN
F8WHC5;A2RTL5	F8WHC5;A2RTL5	Arginine/serine-rich coiled-coil protein 2	Rsrc2	0	NaN
G3X928;Q6NZC7	G3X928;Q6NZC7	SEC23-interacting protein	Sec23ip	5012800	0.17567
A2AKT7;Q6P5F9;F6YA11;A2AKT6	A2AKT7;Q6P5F9	Exportin-1	Xpo1	4986000	0.124662
[truncated: 5,351 more rows]

## Sheet: 14-3-3
Extact 14-3-3 isoforms
Protein IDs	Majority protein IDs	Protein names	Gene names	Intensity L Heart	Normalized Ratio	Protein name
A2A5N2;Q9CQV8;Q9CQV8-2;A2A5N1	A2A5N2;Q9CQV8;Q9CQV8-2;A2A5N1	14-3-3 protein beta/alpha;14-3-3 protein beta/alpha, N-terminally processed	Ywhab	235000000	0.369495	14-3-3β
P62259;Q5SS40;D6REF3;F6WA09	P62259;Q5SS40;D6REF3;F6WA09	14-3-3 protein epsilon	Ywhae	2000000000	0.59891	14-3-3ε
A8IP69;P61982	A8IP69;P61982	14-3-3 protein gamma;14-3-3 protein gamma, N-terminally processed	Ywhag	790000000	0.790202	14-3-3γ
P68510;E9Q4V8	P68510	14-3-3 protein eta	Ywhah	171000000	0.528039	14-3-3η
F6VW30;F6YY69;A3KML3;P68254;P68254-2	F6VW30;F6YY69;A3KML3;P68254;P68254-2	14-3-3 protein theta	Ywhaq	71300000	0.251231	14-3-3θ
P63101;D3YXN6;D3YXF4;D3YW45	P63101	14-3-3 protein zeta/delta	Ywhaz	301000000	0.250954	14-3-3ζ
