# Supplementary material for: Proteomic Landscape and Deduced Functions of the Cardiac 14-3-3 Protein Interactome
Source: Cells. 2022 Nov 4;11(21):3496. doi: 10.3390/cells11213496 (PMC9654263; doi:10.3390/cells11213496)
Supplement: Supplementary file 1 [file cells-11-03496-s001.zip › Supplementary_TableS3-protein_pools.xlsx]

## Sheet: Sheet1
Supplementary Table S3. Protein pools and concentration.
MSB #	Tissue Mass (mg)	Lysis Buffer (mL)	Protein (mg/mL)	Total Protein (mg)	Vol for pool	Pool #
A	70.8	2.8	2.9	8.2	2.4	2
B	62.6	2.5	2.8	7	2.5	2
C	65.6	2.6	3	8	2.5	3
D	56	2.2	2.9	6.5	2.2	4
E	49	2	3.2	6.3	2	1
F	60.8	2.4	3.1	7.4	2.3	2
G	66	2.6	3	7.9	2.4	3
H	61.2	2.4	3.2	7.8	2.4	4
I	54.3	2.2	2.6	5.6	2.2	1
J	112.6	4.5	3.2	14.5	2.8	1
K	65.1	2.6	3.2	8.2	2.2	4
L	58.6	2.3	2.8	6.7	2.3	3
Pool	Protein (mg)
1	21.1
2	21
3	21.1
4	20.9
