# Supplementary material for: Proteomic Landscape and Deduced Functions of the Cardiac 14-3-3 Protein Interactome
Source: Cells. 2022 Nov 4;11(21):3496. doi: 10.3390/cells11213496 (PMC9654263; doi:10.3390/cells11213496)
Supplement: Supplementary file 1 [file cells-11-03496-s001.zip › supplementary_TableS4-brief_overview_of_protein_and_peptide_totals.xlsx]

## Sheet: Sheet1
Supplementary Table S4. A brief overview of protein and peptide totals in each sample.
Sample	Control 1	Control 2	Control 3	Control 4
MSB Identifier	51753	52754	52755	52756
Total No. of Proteins	504	588	571	561
Total No. of Spectra Matching	9975	14370	14278	13070
Sample	14-3-3 1	14-3-3 2	14-3-3 3	14-3-3 4
MSB Identifier	52757	52758	52759	52760
Total No. of Proteins	614	633	683	744
Total No. of Spectra Matching	14813	15672	16957	18345
