# Supplementary material for: Proteomic Landscape and Deduced Functions of the Cardiac 14-3-3 Protein Interactome
Source: Cells. 2022 Nov 4;11(21):3496. doi: 10.3390/cells11213496 (PMC9654263; doi:10.3390/cells11213496)
Supplement: Supplementary file 1 [file cells-11-03496-s001.zip › supplementary_TableS6-statistics.xlsx]

## Sheet: TTEST
				Supplementary Table S6. 14-3-3 interacting proteins obtained from three statistical methods.
ProteinName	GeneName	Accession	52753 SAF	52754 SAF	52755 SAF	52756 SAF	52757 SAF	52758 SAF	52759 SAF	52760 SAF	52753 lgNSAF	52754 lgNSAF	52755 lgNSAF	52756 lgNSAF	52757 lgNSAF	52758 lgNSAF	52759 lgNSAF	52760 lgNSAF	Paired TTEST_lgNSAF	nonzero_IgG	nonzero_IP	nonzero	FoldChange	Log2FoldChange	FDR	BH
Protein SGT1 homolog	Sugt1	Q9CX34	0	0	0	0	0.00293865	0.00303651	0.00278309	0.00298308	-26.5754	-26.5754	-26.5754	-26.5754	-8.41063	-8.36337	-8.48909	-8.38898	7.35451e-09	0	4	4	Inf	Inf	6.70731e-06	6.70731e-06
Coagulation factor XIII A chain	F13a1	Q8BH61	0	0	0	0	0.000131259	0.000133674	0.000122518	0.000143763	-26.5754	-26.5754	-26.5754	-26.5754	-12.8952	-12.8689	-12.9946	-12.7639	9.14314e-08	0	4	4	Inf	Inf	4.16927e-05	4.16927e-05
Ras-related protein Rab-1B	Rab1b	Q9D1G1	0	0	0	0	0.000495204	0.000605178	0.000647117	0.000542377	-26.5754	-26.5754	-26.5754	-26.5754	-10.9797	-10.6903	-10.5937	-10.8484	3.46994e-07	0	4	4	Inf	Inf	0.000105486	0.000105486
14-3-3 protein beta/alpha	Ywhab	Q9CQV8	0.00181411	0.000827844	0.00077365	0.00116929	0.0157581	0.0204464	0.0201201	0.0205974	-9.10651	-10.2383	-10.336	-9.74014	-5.98776	-5.61201	-5.63522	-5.60139	0.00145701	4	4	8	19.2517	4.26691	0.0511075	0.0511075
Chloride intracellular channel protein 4	Clic4	Q9QYB1	0	0	0	0	0.000187836	0.000153033	0.000140262	0.000137153	-26.5754	-26.5754	-26.5754	-26.5754	-12.3782	-12.6738	-12.7995	-12.8318	9.04974e-07	0	4	4	Inf	Inf	0.000188899	0.000188899
cAMP-dependent protein kinase catalytic subunit alpha	Prkaca	P05132	0	0	0	0	0.00013286	0.000162365	0.000148814	0.000194021	-26.5754	-26.5754	-26.5754	-26.5754	-12.8777	-12.5884	-12.7141	-12.3314	1.24275e-06	0	4	4	Inf	Inf	0.000188899	0.000188899
ATP-dependent 6-phosphofructokinase, liver type	Pfkl	P12382	0	0	0	0	0.000256341	0.00018274	0.000191416	0.000187173	-26.5754	-26.5754	-26.5754	-26.5754	-11.9296	-12.4178	-12.3509	-12.3833	1.12835e-06	0	4	4	Inf	Inf	0.000188899	0.000188899
Peroxisomal acyl-coenzyme A oxidase 1	Acox1	Q9R0H0	0	0	0	0	7.263e-05	5.91729e-05	8.13519e-05	5.30325e-05	-26.5754	-26.5754	-26.5754	-26.5754	-13.7489	-14.0445	-13.5853	-14.2025	2.94724e-06	0	4	4	Inf	Inf	0.000338022	0.000338022
5'-AMP-activated protein kinase subunit gamma-1	Prkag1	O54950	0	0	0	0	0.000286697	0.000175183	0.000267605	0.000261673	-26.5754	-26.5754	-26.5754	-26.5754	-11.7681	-12.4788	-11.8676	-11.8999	2.96511e-06	0	4	4	Inf	Inf	0.000338022	0.000338022
Glycogen phosphorylase, muscle form	Pygm	Q9WUB3	0.00213205	0.0024162	0.00240691	0.00270021	0.00384677	0.00400332	0.00436113	0.00438748	-8.87354	-8.69304	-8.6986	-8.53271	-8.02213	-7.96458	-7.84108	-7.83239	0.000308672	4	4	8	1.72448	0.78616	0.0127959	0.0127959
Vimentin	Vim	P20152	0.00147817	0.00224165	0.000579442	0.00161679	0.00615337	0.00698569	0.00508449	0.00644492	-9.40197	-8.80122	-10.753	-9.27264	-7.3444	-7.16138	-7.61968	-7.27762	0.00638329	4	4	8	5.01005	2.32483	0.129368	0.129368
von Willebrand factor A domain-containing protein 8	Vwa8	Q8CC88	0.000255509	0.000278107	0.000474602	0.000448318	0.00159837	0.00262528	0.0023298	0.00206341	-11.9343	-11.812	-11.041	-11.1232	-9.28917	-8.57331	-8.74557	-8.92075	0.00158314	4	4	8	6.30174	2.65575	0.0534751	0.0534751
MICOS complex subunit Mic26	Apoo	Q9DCZ4	0	0	0	0	0.000236837	0.000289433	0.000176852	0.000172932	-26.5754	-26.5754	-26.5754	-26.5754	-12.0438	-11.7544	-12.4651	-12.4974	4.1936e-06	0	4	4	Inf	Inf	0.000424952	0.000424952
Valine--tRNA ligase	Vars1	Q9Z1Q9	0	0	0	0	5.83634e-05	4.75497e-05	5.81085e-05	8.52307e-05	-26.5754	-26.5754	-26.5754	-26.5754	-14.0643	-14.3599	-14.0706	-13.5181	6.02492e-06	0	4	4	Inf	Inf	0.000499521	0.000499521
NADH dehydrogenase [ubiquinone] 1 beta subcomplex subunit 11, mitochondrial	Ndufb11	O09111	0	0	0	0	0.000480639	0.000391586	0.00023927	0.00035095	-26.5754	-26.5754	-26.5754	-26.5754	-11.0227	-11.3183	-12.029	-11.4764	6.01416e-06	0	4	4	Inf	Inf	0.000499521	0.000499521
Catenin alpha-1	Ctnna1	P26231	0	0	0	0	8.17087e-05	6.65696e-05	4.06759e-05	7.95487e-05	-26.5754	-26.5754	-26.5754	-26.5754	-13.579	-13.8746	-14.5851	-13.6176	1.37444e-05	0	4	4	Inf	Inf	0.000873897	0.000873897
Kinesin-1 heavy chain	Kif5b	Q61768	0	0	0	0	9.90409e-05	0.000121036	0.000166402	9.03962e-05	-26.5754	-26.5754	-26.5754	-26.5754	-13.3015	-13.0122	-12.553	-13.4332	6.63587e-06	0	4	4	Inf	Inf	0.000504326	0.000504326
Dihydrolipoyllysine-residue succinyltransferase component of 2-oxoglutarate dehydrogenase complex, mitochondrial	Dlst	Q9D2G2	0.00111068	0.00105123	0.00103153	0.00122497	0.00183428	0.0015397	0.00195078	0.00194813	-9.81433	-9.89369	-9.92098	-9.67303	-9.09056	-9.34312	-9.00172	-9.00369	0.00262317	4	4	8	1.64942	0.721955	0.0703626	0.0703626
NADH dehydrogenase [ubiquinone] iron-sulfur protein 2, mitochondrial	Ndufs2	Q91WD5	0.000821485	0.000583135	0.000908268	0.000823648	0.00123334	0.00121416	0.0013047	0.0013133	-10.2495	-10.7439	-10.1046	-10.2457	-9.6632	-9.68581	-9.58206	-9.57257	0.0096578	4	4	8	1.65361	0.72562	0.16311	0.16311
NADH dehydrogenase [ubiquinone] 1 alpha subcomplex subunit 12	Ndufa12	Q7TMF3	0.00469535	0.00424202	0.00481382	0.00465422	0.00544725	0.00613484	0.00574249	0.00573218	-7.73455	-7.88103	-7.6986	-7.74724	-7.52025	-7.34876	-7.44411	-7.4467	0.0196332	4	4	8	1.25772	0.330808	0.263316	0.263316
X-ray repair cross-complementing protein 6	Xrcc6	P23475	0	0	0	0	0.000197364	0.000160796	8.84259e-05	0.000115288	-26.5754	-26.5754	-26.5754	-26.5754	-12.3068	-12.6024	-13.465	-13.0823	1.43733e-05	0	4	4	Inf	Inf	0.000873897	0.000873897
Sarcalumenin	Srl	Q7TQ48	0.0012766	0.00128776	0.00147089	0.00146522	0.00196706	0.00189025	0.00225977	0.0018414	-9.61347	-9.60091	-9.40909	-9.41466	-8.98973	-9.0472	-8.7896	-9.08497	0.00458226	4	4	8	1.45045	0.5365	0.109974	0.109974
Endoplasmic reticulum chaperone BiP	Hspa5	P20029	0.0069541	0.00718998	0.00835733	0.00704819	0.00571204	0.00477698	0.00545171	0.00488893	-7.16792	-7.1198	-6.90274	-7.14853	-7.45177	-7.70968	-7.51907	-7.67626	0.00692557	4	4	8	0.707939	-0.498303	0.137307	0.137307
General transcription factor II-I	Gtf2i	Q9ESZ8	0.00223525	0.00241454	0.00257883	0.00238729	0.00199408	0.00170386	0.001943	0.00172237	-8.80534	-8.69403	-8.59906	-8.7104	-8.97005	-9.19697	-9.00749	-9.18138	0.0149721	4	4	8	0.768173	-0.380497	0.216554	0.216554
Histone-lysine N-methyltransferase Smyd1	Smyd1	P97443	0	0	0	0	0.000291817	0.000356623	0.000581085	0.000284102	-26.5754	-26.5754	-26.5754	-26.5754	-11.7426	-11.4533	-10.7489	-11.7813	8.66125e-06	0	4	4	Inf	Inf	0.00060762	0.00060762
Inosine-5'-monophosphate dehydrogenase 2	Impdh2	P24547	0	0	0	0	9.72723e-05	0.000237748	0.000145271	0.000213077	-26.5754	-26.5754	-26.5754	-26.5754	-13.3275	-12.0382	-12.7489	-12.1963	2.01287e-05	0	4	4	Inf	Inf	0.00107985	0.00107985
Voltage-dependent anion-selective channel protein 3	Vdac3	Q60931	0	0	0.000155285	0.000176022	0.000351435	0.000429481	0.000590457	0.000449065	-26.5754	-26.5754	-12.6527	-12.4719	-11.4744	-11.1851	-10.7259	-11.1208	0.120923	2	4	6	Inf	Inf	0.542371	0.542371
Alpha-actinin-4	Actn4	P57780	0.000172773	0.000392459	0.000320921	0.000207873	0.000648482	0.00103553	0.000949105	0.00121217	-12.4988	-11.3151	-11.6054	-12.2319	-10.5906	-9.91541	-10.0411	-9.68818	0.00525832	4	4	8	3.79517	1.92416	0.11989	0.11989
Elongation factor 1-delta	Eef1d	P57776	0	0.000166162	0	0	0.000351435	0.000214741	0.000328032	0.000320761	-26.5754	-12.555	-26.5754	-26.5754	-11.4744	-12.1851	-11.5738	-11.6062	0.0532581	1	4	5	Inf	Inf	0.368458	0.368458
Monocarboxylate transporter 1	Slc16a1	P53986	0	9.71892e-05	9.08268e-05	0.000102956	0.000205556	0.000251206	0.000345362	0.000262661	-26.5754	-13.3287	-13.4264	-13.2455	-12.2481	-11.9588	-11.4996	-11.8945	0.234538	3	4	7	Inf	Inf	0.54268	0.54268
ATP-dependent RNA helicase DDX1	Ddx1	Q91VR5	0	0	0	0	6.56295e-05	5.34695e-05	0.000122518	0.000119802	-26.5754	-26.5754	-26.5754	-26.5754	-13.8951	-14.1907	-12.9946	-13.0269	2.78488e-05	0	4	4	Inf	Inf	0.001411	0.001411
Mitofusin-1	Mfn1	Q811U4	0	0	0	0	0.00016212	5.2833e-05	0.000121059	0.000118376	-26.5754	-26.5754	-26.5754	-26.5754	-12.5906	-14.2079	-13.0119	-13.0442	3.8585e-05	0	4	4	Inf	Inf	0.00175948	0.00175948
Gap junction alpha-1 protein	Gja1	P23242	0	0.000119791	0.000111949	0	0.00025336	0.000206417	0.000283786	0.000231246	-26.5754	-13.0271	-13.1247	-26.5754	-11.9465	-12.2421	-11.7829	-12.0782	0.138782	2	4	6	Inf	Inf	0.542371	0.542371
Cysteine and glycine-rich protein 3	Csrp3	P50462	0.00984804	0.00956619	0.0100861	0.00987397	0.00894905	0.00940427	0.00910366	0.00899658	-6.66595	-6.70784	-6.63149	-6.66215	-6.80405	-6.73247	-6.77934	-6.79641	0.0312631	4	4	8	0.926381	-0.110323	0.367611	0.367611
Major vault protein	Mvp	Q9EQK5	0.00018897	0.00016097	0.00012536	0.000113681	0.000340453	0.000300488	0.000233039	0.000269305	-12.3695	-12.6008	-12.9615	-13.1026	-11.5202	-11.7004	-12.0671	-11.8584	0.00177721	4	4	8	1.97407	0.981174	0.0558901	0.0558901
Calsequestrin-2	Casq2	O09161	0.000680292	0.000697535	0.000651872	0.000966285	0.00136181	0.00106326	0.00118638	0.00124295	-10.5215	-10.4854	-10.5831	-10.0152	-9.52025	-9.87727	-9.7192	-9.65201	0.0151968	4	4	8	1.6581	0.729531	0.216554	0.216554
Isobutyryl-CoA dehydrogenase, mitochondrial	Acad8	Q9D7B6	0.000241882	0.000228935	0.000160461	0.000242519	0.000302625	0.000345175	0.000361564	0.000397743	-12.0134	-12.0927	-12.6054	-12.0096	-11.6901	-11.5003	-11.4334	-11.2958	0.0288736	4	4	8	1.66305	0.733835	0.351103	0.351103
Ig lambda-2 chain C region	Iglc2	P01844	0.00197903	0.00280965	0.00262572	0.00272833	0.000990409	0.00161381	0.00129423	0.00162713	-8.98098	-8.47539	-8.57307	-8.51776	-9.97967	-9.27531	-9.59367	-9.26344	0.00101933	4	4	8	0.54103	-0.886219	0.0371852	0.0371852
Long-chain specific acyl-CoA dehydrogenase, mitochondrial	Acadl	P51174	0.00219205	0.00187798	0.00210605	0.00164837	0.00306408	0.00254259	0.00271173	0.00265162	-8.8335	-9.0566	-8.89124	-9.24474	-8.35033	-8.61948	-8.52657	-8.5589	0.00561814	4	4	8	1.41198	0.497723	0.124969	0.124969
Cytochrome b-c1 complex subunit 1, mitochondrial	Uqcrc1	Q9CZ13	0.00198526	0.00184659	0.00213443	0.00185321	0.00241529	0.00221899	0.00234079	0.00232642	-8.97645	-9.08091	-8.87193	-9.07575	-8.69358	-8.81588	-8.73879	-8.74766	0.00916452	4	4	8	1.19258	0.254082	0.160499	0.160499
14-3-3 protein theta	Ywhaq	P68254	0	0	0	0.000584643	0.00291817	0.00808345	0.00900681	0.00987256	-26.5754	-26.5754	-26.5754	-10.7401	-8.42072	-6.95081	-6.79477	-6.66236	0.0269269	1	4	5	Inf	Inf	0.337538	0.337538
14-3-3 protein epsilon	Ywhae	P62259	0.001126	0.000355243	0.000580978	0.000564483	0.00140877	0.0022955	0.00231432	0.00288021	-9.79456	-11.4589	-10.7492	-10.7908	-9.47134	-8.76697	-8.75519	-8.4396	0.0393994	4	4	8	4.19969	2.07028	0.368458	0.368458
Protein-L-isoaspartate(D-aspartate) O-methyltransferase	Pcmt1	P23506	0.000580516	0.000309062	0.000770211	0.0003274	0	0	0	0	-10.7504	-11.6598	-10.3424	-11.5766	-26.5754	-26.5754	-26.5754	-26.5754	1.9558e-05	4	0	4	0	#NAME?	0.00107985	0.00107985
NADH dehydrogenase [ubiquinone] 1 beta subcomplex subunit 10	Ndufb10	Q9DCS9	0	0.000367931	0	0	0.000778178	0.000633996	0.00106532	0.00142051	-26.5754	-11.4082	-26.5754	-26.5754	-10.3276	-10.6232	-9.87448	-9.45936	0.0495485	1	4	5	Inf	Inf	0.368458	0.368458
Acyl-coenzyme A thioesterase 2, mitochondrial	Acot2	Q9QYR9	0	0	0.000192553	0	0.000326835	0.000266278	0.000366083	0.000238646	-26.5754	-26.5754	-12.3424	-26.5754	-11.5791	-11.8747	-11.4155	-12.0328	0.0468806	1	4	5	Inf	Inf	0.368458	0.368458
NADH dehydrogenase [ubiquinone] 1 alpha subcomplex subunit 6	Ndufa6	Q9CQZ5	0.00290258	0.00257551	0.00208599	0.00236456	0.00381307	0.00369831	0.00366083	0.00304937	-8.42844	-8.60092	-8.90505	-8.72421	-8.03483	-8.07891	-8.09361	-8.35727	0.0142386	4	4	8	1.44855	0.534612	0.212878	0.212878
NADH dehydrogenase [ubiquinone] 1 beta subcomplex subunit 7	Ndufb7	Q9CR61	0	0	0.000300864	0	0.000510679	0.00041606	0.000381337	0.000621474	-26.5754	-26.5754	-11.6986	-26.5754	-10.9353	-11.2309	-11.3566	-10.652	0.0537996	1	4	5	Inf	Inf	0.368458	0.368458
Ig kappa chain V-VI region NQ6-8.3.1	NA	P04943	0.00151176	0.00171701	0.00200576	0.00181889	0.00113484	0.00110949	0.00135586	0.00132581	-9.36955	-9.18588	-8.96163	-9.10272	-9.78328	-9.81587	-9.52656	-9.5589	0.00188411	4	4	8	0.700438	-0.513671	0.0572768	0.0572768
Ras-related protein Rab-21	Rab21	P35282	0.000302352	0.000321939	0.000200576	0.000227361	0	0	0	0.000165726	-11.6914	-11.6009	-12.2835	-12.1027	-26.5754	-26.5754	-26.5754	-12.5588	0.0522626	4	1	5	0.182228	-2.45618	0.368458	0.368458
Methylcrotonoyl-CoA carboxylase beta chain, mitochondrial	Mccc2	Q3ULD5	0	0.000168886	0.000276203	0.000313087	0.000759043	0.000509275	0.000633478	0.000489029	-26.5754	-12.5316	-11.8219	-11.6411	-10.3635	-10.9392	-10.6244	-10.9978	0.283846	3	4	7	Inf	Inf	0.54268	0.54268
Dihydrolipoyl dehydrogenase, mitochondrial	Dld	O08749	0.000873462	0.000858505	0.00111431	0.000808395	0.00146269	0.00123277	0.00158184	0.00125216	-10.161	-10.1859	-9.80962	-10.2726	-9.41715	-9.66387	-9.30417	-9.64136	0.00166876	4	4	8	1.51976	0.603845	0.0543539	0.0543539
60 kDa heat shock protein, mitochondrial	Hspd1	P63038	0.000773228	0.00139331	0.0013021	0.000939262	0.00191993	0.00163696	0.00173373	0.00192351	-10.3368	-9.48726	-9.58493	-10.0562	-9.02472	-9.25476	-9.1719	-9.02203	0.0606365	4	4	8	1.75931	0.815014	0.36867	0.36867
Elongation factor Tu, mitochondrial	Tufm	Q8BFR5	0.00232206	0.00190588	0.00269574	0.0022918	0.00397649	0.00319534	0.00378286	0.00302285	-8.75037	-9.03532	-8.5351	-8.7693	-7.97429	-8.28981	-8.0463	-8.36987	0.00756456	4	4	8	1.52783	0.611481	0.146785	0.146785
Short-chain specific acyl-CoA dehydrogenase, mitochondrial	Acads	Q07417	0.000241882	0.000228935	0.000267435	0.000242519	0.000302625	0.000295865	0.000361564	0.000309356	-12.0134	-12.0927	-11.8685	-12.0096	-11.6901	-11.7227	-11.4334	-11.6584	0.000576192	4	4	8	1.29276	0.370458	0.0228472	0.0228472
3-hydroxyisobutyryl-CoA hydrolase, mitochondrial	Hibch	Q8QZS1	0	0	0.000111949	0	0.00019002	0.000154813	0.000141893	0.000138748	-26.5754	-26.5754	-13.1247	-26.5754	-12.3615	-12.6571	-12.7828	-12.8151	0.0533279	1	4	5	Inf	Inf	0.368458	0.368458
ATP synthase subunit beta, mitochondrial	Atp5f1b	P56480	0.00855224	0.00763456	0.00769352	0.00740548	0.00958132	0.00907406	0.00969685	0.00870064	-6.86948	-7.03324	-7.02214	-7.07719	-6.70556	-6.78403	-6.68827	-6.84466	0.00596269	4	4	8	1.18604	0.246154	0.127905	0.127905
Succinate--CoA ligase [GDP-forming] subunit beta, mitochondrial	Suclg2	Q9Z2I8	0.000231589	0.000219193	0.000204843	0.000406348	0.000521545	0.000519337	0.000475995	0.000423131	-12.0761	-12.1554	-12.2531	-11.265	-10.9049	-10.911	-11.0367	-11.2066	0.0493957	4	4	8	1.99659	0.997537	0.368458	0.368458
NADH dehydrogenase [ubiquinone] 1 beta subcomplex subunit 6	Ndufb6	Q3UIU2	0	0.000321939	0.000601728	0	0.000851132	0.000832119	0.00139824	0.00111865	-26.5754	-11.6009	-10.6986	-26.5754	-10.1983	-10.2309	-9.48217	-9.80401	0.136022	2	4	6	Inf	Inf	0.542371	0.542371
Protein phosphatase 1 regulatory subunit 3A	Ppp1r3a	Q99MR9	0	0	0	0	0.000112546	0.000495145	0.000521055	0.000427328	-26.5754	-26.5754	-26.5754	-26.5754	-13.1171	-10.9798	-10.9062	-11.1923	9.43029e-05	0	4	4	Inf	Inf	0.00409544	0.00409544
Heat shock cognate 71 kDa protein	Hspa8	P63017	0.00536569	0.00467945	0.00532232	0.00511082	0.00429642	0.00346912	0.00335147	0.00434157	-7.54202	-7.73944	-7.55373	-7.61223	-7.86265	-8.17121	-8.22099	-7.84757	0.0214854	4	4	8	0.755314	-0.404851	0.275982	0.275982
Microtubule-associated protein 4	Map4	P27546	0	0	0.000123431	4.66382e-05	0.000186231	0.00013276	0.000225977	0.000186973	-26.5754	-26.5754	-12.9839	-14.3878	-12.3905	-12.8788	-12.1115	-12.3848	0.123567	2	4	6	Inf	Inf	0.542371	0.542371
NADH dehydrogenase [ubiquinone] flavoprotein 2, mitochondrial	Ndufv2	Q9D6J6	0.000671894	0.000667726	0.000980593	0.000505247	0.00141225	0.0010684	0.00135586	0.00110484	-10.5395	-10.5484	-9.99404	-10.9507	-9.46778	-9.87032	-9.52656	-9.82193	0.0132958	4	4	8	1.81785	0.862231	0.202096	0.202096
Isocitrate dehydrogenase [NADP], mitochondrial	Idh2	P54071	0.00412622	0.00404002	0.00542735	0.00417275	0.00624831	0.00543869	0.00634066	0.00592716	-7.92096	-7.95142	-7.52553	-7.90478	-7.32232	-7.52252	-7.30115	-7.39844	0.0117294	4	4	8	1.36231	0.446051	0.181309	0.181309
ADP/ATP translocase 2	Slc25a5	P51881	0.00505753	0.00468275	0.00554319	0.00305904	0.00718046	0.00638799	0.00893638	0.00825619	-7.62735	-7.73842	-7.49507	-8.3527	-7.12171	-7.29042	-6.80609	-6.92031	0.0429297	4	4	8	1.77375	0.826802	0.368458	0.368458
Glycogen phosphorylase, brain form	Pygb	Q8CI94	0.00175801	0.00146034	0.00166251	0.00174388	0.00207782	0.0019216	0.00220153	0.00241926	-9.15184	-9.41947	-9.23242	-9.16347	-8.91071	-9.02347	-8.82727	-8.69121	0.00447631	4	4	8	1.30232	0.381084	0.109974	0.109974
3-hydroxyacyl-CoA dehydrogenase type-2	Hsd17b10	O08756	0.000806272	0.000476947	0.000624014	0.000606296	0.00181575	0.000986216	0.00195847	0.00139947	-10.2764	-11.0339	-10.6461	-10.6877	-9.10521	-9.98579	-8.99605	-9.4809	0.00236128	4	4	8	2.44163	1.28785	0.0672964	0.0672964
Stress-70 protein, mitochondrial	Hspa9	P38647	0.0127236	0.0107607	0.0136172	0.0119224	0.0104468	0.00887594	0.00961178	0.0091263	-6.29634	-6.53808	-6.19843	-6.39018	-6.5808	-6.81588	-6.70098	-6.77575	0.0063115	4	4	8	0.779307	-0.359736	0.129368	0.129368
Cysteine-rich protein 2	Crip2	Q9DCT8	0.00252398	0.0021276	0.00219761	0.00272833	0.00201311	0.00144716	0.00159167	0.00164285	-8.63008	-8.87655	-8.82984	-8.51776	-8.95635	-9.43255	-9.29524	-9.24957	0.00878122	4	4	8	0.701049	-0.512413	0.160223	0.160223
Sodium/potassium-transporting ATPase subunit alpha-1	Atp1a1	Q8VDN2	0.000642164	0.000820518	0.0010011	0.000748481	0.00115694	0.00104076	0.00109789	0.00119675	-10.6047	-10.2512	-9.96418	-10.3837	-9.75546	-9.90813	-9.83104	-9.70665	0.0532162	4	4	8	1.44141	0.527478	0.368458	0.368458
Isovaleryl-CoA dehydrogenase, mitochondrial	Ivd	Q9JHI5	0.000236623	0.000279947	0.000261621	0.000415181	0.000473674	0.000482388	0.000574769	0.00043233	-12.0451	-11.8025	-11.9002	-11.2339	-11.0438	-11.0175	-10.7647	-11.1755	0.0531141	4	4	8	1.7408	0.799751	0.368458	0.368458
Myoglobin	Mb	P04247	0.0125921	0.0116656	0.0124593	0.0128392	0.0139385	0.0151413	0.0139973	0.0133361	-6.31134	-6.4216	-6.32663	-6.2833	-6.16478	-6.04537	-6.15871	-6.22852	0.0709949	4	4	8	1.14176	0.191254	0.412404	0.412404
Collagen alpha-1(IV) chain	Col4a1	P02463	4.50711e-05	6.39879e-05	4.48493e-05	5.08385e-05	3.38338e-05	0	0	2.47046e-05	-14.4371	-13.9316	-14.4442	-14.2634	-14.8507	-26.5754	-26.5754	-15.3043	0.146882	4	2	6	0.309155	-1.6936	0.542371	0.542371
Succinate dehydrogenase [ubiquinone] flavoprotein subunit, mitochondrial	Sdha	Q8K2B3	0.00347912	0.00416316	0.00441817	0.00485868	0.00611883	0.00510671	0.00562777	0.0054213	-8.16706	-7.9081	-7.82233	-7.68522	-7.35253	-7.61339	-7.47322	-7.52714	0.0659648	4	4	8	1.34374	0.42625	0.38564	0.38564
Voltage-dependent anion-selective channel protein 2	Vdac2	Q60930	0.000453528	0.000563394	0.000451296	0.000596823	0.000936246	0.000693433	0.000699118	0.000745769	-11.1065	-10.7935	-11.1136	-10.7104	-10.0608	-10.4939	-10.4822	-10.389	0.0459086	4	4	8	1.52347	0.607359	0.368458	0.368458
Guanine nucleotide-binding protein G(i) subunit alpha-2	Gnai2	P08752	0	0	0	0.000136417	0.000136181	0.000166424	0.00020338	0.00024859	-26.5754	-26.5754	-26.5754	-12.8396	-12.8421	-12.5528	-12.2635	-11.9739	0.0470928	1	4	5	Inf	Inf	0.368458	0.368458
Succinate--CoA ligase [ADP-forming] subunit beta, mitochondrial	Sucla2	Q9Z2I9	0.00203181	0.00164833	0.00192553	0.00223723	0.00256021	0.00244088	0.00264394	0.00230691	-8.94301	-9.24477	-9.02052	-8.80406	-8.60952	-8.67837	-8.56309	-8.75982	0.0527979	4	4	8	1.28628	0.363207	0.368458	0.368458
Ig gamma-1 chain C region secreted form	Ighg1	P01868	0.066719	0.0828457	0.0869162	0.0970074	0.0496305	0.0636109	0.0606749	0.0592748	-3.90576	-3.59343	-3.52423	-3.36576	-4.33263	-3.97458	-4.04276	-4.07644	0.0060306	4	4	8	0.705204	-0.503888	0.127905	0.127905
Cell division control protein 42 homolog	Cdc42	P60766	0	0	0	0	0.000259393	0.000422664	0.000484237	0.000947008	-26.5754	-26.5754	-26.5754	-26.5754	-11.9125	-11.2082	-11.012	-10.0443	3.36017e-05	0	4	4	Inf	Inf	0.00161288	0.00161288
ATP synthase F(0) complex subunit B1, mitochondrial	Atp5pb	Q9CQQ7	0.00487934	0.00373005	0.00439884	0.00357506	0.00544725	0.00512662	0.0056806	0.00507466	-7.6791	-8.06658	-7.82866	-8.12781	-7.52025	-7.60777	-7.45974	-7.62247	0.0166616	4	4	8	1.30041	0.378969	0.230233	0.230233
2-oxoglutarate dehydrogenase, mitochondrial	Ogdh	Q60597	0.0014075	0.00168741	0.00255216	0.00190513	0.00255927	0.0027546	0.00327862	0.00330881	-9.47264	-9.21097	-8.61406	-9.03589	-8.61005	-8.50393	-8.25269	-8.23947	0.00878416	4	4	8	1.61805	0.694255	0.160223	0.160223
Profilin-1	Pfn1	P62962	0	0.000343402	0.000320921	0	0.000544725	0.000443797	0.000813519	0.000928068	-26.5754	-11.5078	-11.6054	-26.5754	-10.8422	-11.1378	-10.2635	-10.0735	0.150169	2	4	6	Inf	Inf	0.542371	0.542371
Mitochondrial 2-oxoglutarate/malate carrier protein	Slc25a11	Q9CR62	0.00106713	0.000833255	0.00141583	0.000802451	0.00160213	0.00287163	0.0023927	0.00175475	-9.87204	-10.2289	-9.46413	-10.2833	-9.28578	-8.44391	-8.70714	-9.15451	0.0278825	4	4	8	2.20608	1.14149	0.343632	0.343632
Cytochrome b-c1 complex subunit Rieske, mitochondrial	Uqcrfs1	Q9CR68	0.00437889	0.00435173	0.00406685	0.00319874	0.00488374	0.00512662	0.00525982	0.00480035	-7.83521	-7.84419	-7.94187	-8.28828	-7.6778	-7.60777	-7.57077	-7.70264	0.0366685	4	4	8	1.27185	0.346928	0.368458	0.368458
Hemoglobin subunit beta-1	Hbb-b1	P02088	0.00476205	0.00450715	0.00601728	0.00511563	0.00595793	0.00637958	0.00711829	0.00745769	-7.7142	-7.79357	-7.37667	-7.61087	-7.39097	-7.29232	-7.13425	-7.06705	0.0111454	4	4	8	1.32684	0.407996	0.178326	0.178326
Phosphate carrier protein, mitochondrial	Slc25a3	Q8VEM8	0.00380964	0.00321939	0.00415192	0.00313758	0.00442589	0.0043825	0.00483027	0.00432546	-8.03613	-8.27899	-7.912	-8.31613	-7.81981	-7.83403	-7.69368	-7.85293	0.0162283	4	4	8	1.26625	0.340568	0.227696	0.227696
Methylcrotonoyl-CoA carboxylase subunit alpha, mitochondrial	Mccc1	Q99MR8	0.000137781	0.000619427	0.000517943	0.000552574	0.000930859	0.000758387	0.000875305	0.000805556	-12.8252	-10.6568	-10.9149	-10.8215	-10.0691	-10.3648	-10.1579	-10.2777	0.149679	4	4	8	2.78205	1.47615	0.542371	0.542371
Medium-chain specific acyl-CoA dehydrogenase, mitochondrial	Acadm	P45952	0.00283948	0.00246354	0.00251156	0.00231315	0.00301967	0.00274961	0.00318333	0.00315601	-8.46015	-8.66505	-8.6372	-8.75592	-8.37139	-8.50655	-8.29524	-8.30768	0.0515873	4	4	8	1.20286	0.266466	0.368458	0.368458
Fermitin family homolog 2	Fermt2	Q8CIB5	0	0	9.25735e-05	6.99573e-05	0.000139673	0.000113794	0.000156446	0.000101985	-26.5754	-26.5754	-13.3989	-13.803	-12.8056	-13.1012	-12.642	-13.2592	0.152824	2	4	6	Inf	Inf	0.542371	0.542371
Four and a half LIM domains protein 1	Fhl1	P97447	0.000793674	0.000965818	0.000676944	0.00110839	0.000680906	0.00041606	0.000444893	0.000559327	-10.2991	-10.0159	-10.5287	-9.81731	-10.5202	-11.2309	-11.1342	-10.804	0.0404698	4	4	8	0.612635	-0.7069	0.368458	0.368458
Ig kappa chain V-III region PC 3741/TEPC 111	NA	P01660	0.000907056	0.00128776	0.00160461	0.00227361	0	0	0.000847415	0.000662906	-10.1065	-9.60091	-9.28356	-8.78079	-26.5754	-26.5754	-10.2046	-10.5589	0.134817	4	2	6	0.20492	-2.28687	0.542371	0.542371
10 kDa heat shock protein, mitochondrial	Hspe1	Q64433	0	0.000468275	0	0	0.000495204	0.000403452	0.000554672	0.000542377	-26.5754	-11.0603	-26.5754	-26.5754	-10.9797	-11.2753	-10.8161	-10.8484	0.0602262	1	4	5	Inf	Inf	0.36867	0.36867
Isocitrate dehydrogenase [NAD] subunit gamma 1, mitochondrial	Idh3g	P70404	0.00101253	0.000778644	0.00117547	0.000888295	0.00139348	0.00113529	0.00137163	0.00124873	-9.94781	-10.3267	-9.73254	-10.1367	-9.48708	-9.7827	-9.50988	-9.64531	0.0090944	4	4	8	1.35173	0.434808	0.160499	0.160499
Carnitine O-palmitoyltransferase 1, muscle isoform	Cpt1b	Q924X2	0.00136058	0.0016097	0.00196929	0.00155019	0.00201177	0.0019164	0.00228802	0.00212431	-9.52155	-9.27899	-8.9881	-9.33333	-8.95731	-9.02738	-8.77168	-8.87878	0.0206897	4	4	8	1.30034	0.378885	0.269557	0.269557
Beta-centractin	Actr1b	Q8R5C5	0	0.000122644	0	0	0.000194545	0.000158499	9.68475e-05	0.000284102	-26.5754	-12.9931	-26.5754	-26.5754	-12.3275	-12.6231	-13.3338	-11.7813	0.0535345	1	4	5	Inf	Inf	0.368458	0.368458
Atypical kinase COQ8A, mitochondrial	Coq8a	Q60936	0.000151176	0.000107313	0.000133717	7.5787e-05	0.000302625	0.000184915	0.000282472	0.000165726	-12.6914	-13.1858	-12.8684	-13.6875	-11.6901	-12.4008	-11.7896	-12.5588	0.000946388	4	4	8	2.00603	1.00435	0.0359627	0.0359627
Heat shock 70 kDa protein 4	Hspa4	Q61316	0.000501776	0.000657578	0.000665741	0.000638546	0.00049257	0.000306881	0.000497631	0.000444288	-10.9606	-10.5705	-10.5527	-10.6129	-10.9874	-11.67	-10.9726	-11.1362	0.101695	4	4	8	0.722901	-0.468131	0.509594	0.509594
Heat shock 70 kDa protein 1B	Hspa1b	P17879	0.000829309	0.000735861	0.000859611	0.000779524	0.000622543	0.000538896	0.000581085	0.000767077	-10.2358	-10.4083	-10.184	-10.3251	-10.6495	-10.8577	-10.7489	-10.3483	0.0540348	4	4	8	0.785757	-0.347845	0.368458	0.368458
Heat shock 70 kDa protein 4L	Hspa4l	P48722	0.000385981	0.000410986	0.000716952	0.000435372	0.000202823	0.000259668	0.000302906	0.000190409	-11.3391	-11.2486	-10.4458	-11.1654	-12.2674	-11.911	-11.6888	-12.3585	0.00488064	4	4	8	0.504283	-0.987696	0.114132	0.114132
40S ribosomal protein S29	Rps29	P62274	0.0057015	0.00441517	0.00378229	0.00428738	0.00389089	0.00285298	0.00174325	0.00227282	-7.45444	-7.82331	-8.04652	-7.86568	-8.00568	-8.45331	-9.16399	-8.78129	0.00864995	4	4	8	0.579907	-0.786106	0.160223	0.160223
Mitochondrial import inner membrane translocase subunit TIM44	Timm44	O35857	0	0	0.000141583	0.00016049	0.000160213	0.000261057	0.00023927	0.00035095	-26.5754	-26.5754	-12.786	-12.6051	-12.6076	-11.9033	-12.029	-11.4764	0.142826	2	4	6	Inf	Inf	0.542371	0.542371
[Pyruvate dehydrogenase (acetyl-transferring)] kinase isozyme 2, mitochondrial	Pdk2	Q9JK42	0	0	0	0.000177935	0.000236837	0.000192955	0.000132639	0.000216165	-26.5754	-26.5754	-26.5754	-12.4563	-12.0438	-12.3394	-12.8801	-12.1755	0.0542584	1	4	5	Inf	Inf	0.368458	0.368458
60S ribosomal protein L27a	Rpl27a	P14115	0	0	0	0	0	0.000261057	0.00023927	0.000233967	-26.5754	-26.5754	-26.5754	-26.5754	-26.5754	-11.9033	-12.029	-12.0613	0.0576749	0	3	3	NA	NA	0.368458	0.368458
SWI/SNF complex subunit SMARCC2	Smarcc2	Q6PDG5	0	0	0	0	0	3.33682e-05	3.05834e-05	2.99055e-05	-26.5754	-26.5754	-26.5754	-26.5754	-26.5754	-14.8707	-14.9964	-15.0287	0.0576784	0	3	3	NA	NA	0.368458	0.368458
X-ray repair cross-complementing protein 5	Xrcc5	P27641	0	0	0	0	0.000196888	0.000187143	0	0.000167723	-26.5754	-26.5754	-26.5754	-26.5754	-12.3103	-12.3835	-26.5754	-12.5415	0.0576817	0	3	3	NA	NA	0.368458	0.368458
14-3-3 protein gamma	Ywhag	P61982	0.00259159	0.00110379	0.000945572	0.00116929	0.00233453	0.00340773	0.00254225	0.00284102	-8.59194	-9.8233	-10.0465	-9.74014	-8.74264	-8.19697	-8.61967	-8.45937	0.0816547	4	4	8	2.2766	1.18688	0.45408	0.45408
Nucleoside diphosphate-linked moiety X motif 8	Nudt8	Q9CR24	0	0	0	0	0.000355255	0	0.00044213	0.000345864	-26.5754	-26.5754	-26.5754	-26.5754	-11.4588	-26.5754	-11.1432	-11.4975	0.0576989	0	3	3	NA	NA	0.368458	0.368458
Mitochondrial fission process protein 1	Mtfp1	Q9CRB8	0	0.000429252	0	0	0.000302625	0.000493108	0.000790921	0.000552421	-26.5754	-11.1859	-26.5754	-26.5754	-11.6901	-10.9858	-10.3042	-10.8219	0.0557129	1	4	5	Inf	Inf	0.368458	0.368458
ATP-dependent 6-phosphofructokinase, platelet type	Pfkp	Q9WUA3	0	0	0	0	0.000128171	0	0.000119635	9.35867e-05	-26.5754	-26.5754	-26.5754	-26.5754	-12.9295	-26.5754	-13.029	-13.3832	0.0577265	0	3	3	NA	NA	0.368458	0.368458
Prostaglandin reductase-3	Zadh2	Q8BGC4	0.00026548	0.00025127	0	0	0.000332149	0.000378851	0.000297629	0.000436548	-11.8791	-11.9584	-26.5754	-26.5754	-11.5558	-11.366	-11.7141	-11.1615	0.163156	2	4	6	Inf	Inf	0.542371	0.542371
Cytochrome b-c1 complex subunit 2, mitochondrial	Uqcrc2	Q9DB77	0.00559351	0.00482909	0.00521497	0.00420618	0.00635512	0.00540878	0.00660984	0.00600758	-7.48203	-7.69403	-7.58312	-7.89327	-7.29786	-7.53048	-7.24117	-7.379	0.034442	4	4	8	1.23799	0.307996	0.368458	0.368458
Isocitrate dehydrogenase [NAD] subunit alpha, mitochondrial	Idh3a	Q9D6R2	0.001542	0.00135214	0.00138397	0.00150058	0.00170226	0.00155329	0.00183042	0.00208815	-9.34098	-9.53052	-9.49696	-9.38025	-9.19832	-9.33045	-9.0936	-8.90355	0.0313975	4	4	8	1.24171	0.312327	0.367611	0.367611
Electron transfer flavoprotein subunit alpha, mitochondrial	Etfa	Q99LC5	0.00207327	0.00176607	0.00240691	0.00194881	0.00311271	0.00240918	0.00249866	0.00255692	-8.91387	-9.14524	-8.6986	-9.00318	-8.32761	-8.69723	-8.64462	-8.61137	0.0466103	4	4	8	1.30392	0.382852	0.368458	0.368458
Protein FAM210A	Fam210a	Q8BGY7	0	0.000241454	0	0	0.000170226	0.000485403	0.000444893	0.00024859	-26.5754	-12.0159	-26.5754	-26.5754	-12.5202	-11.0085	-11.1342	-11.9739	0.0463231	1	4	5	Inf	Inf	0.368458	0.368458
39S ribosomal protein L37, mitochondrial	Mrpl37	Q921S7	0	0	0	0	0	0.000184915	0.000169483	0.00024859	-26.5754	-26.5754	-26.5754	-26.5754	-26.5754	-12.4008	-12.5265	-11.9739	0.0577446	0	3	3	NA	NA	0.368458	0.368458
Ras-related C3 botulinum toxin substrate 1	Rac1	P63001	0	0.000245287	0	0	0.000389089	0.000316998	0.00038739	0.000947008	-26.5754	-11.9932	-26.5754	-26.5754	-11.3276	-11.6232	-11.3339	-10.0443	0.0538388	1	4	5	Inf	Inf	0.368458	0.368458
Calcium/calmodulin-dependent protein kinase type II subunit delta	Camk2d	Q6PHZ2	0	0.000137974	0.000128942	0.000146161	0.000243181	0.000158499	0.000217907	0.00024859	-26.5754	-12.8232	-12.9209	-12.7401	-12.0056	-12.6231	-12.1639	-11.9739	0.328813	3	4	7	Inf	Inf	0.54268	0.54268
Apolipoprotein A-I	Apoa1	Q00623	0	0.000166162	0.000232927	0.000264032	0	0	0	0	-26.5754	-12.555	-12.0678	-11.8869	-26.5754	-26.5754	-26.5754	-26.5754	0.0577746	3	0	3	NA	NA	0.368458	0.368458
Sarcoplasmic/endoplasmic reticulum calcium ATPase 2	Atp2a2	O55143	0.00384907	0.00436718	0.0051487	0.00469748	0.00556567	0.00526768	0.00530556	0.00515337	-8.02127	-7.83908	-7.60157	-7.73389	-7.48923	-7.56861	-7.55828	-7.60027	0.105089	4	4	8	1.19492	0.256917	0.51806	0.51806
Histone H1.3	H1-3	P43277	0	0	0.00021881	0.00024803	0.000247602	0.000403452	0.000554672	0.000813566	-26.5754	-26.5754	-12.158	-11.9771	-11.9796	-11.2753	-10.8161	-10.2634	0.123648	2	4	6	Inf	Inf	0.542371	0.542371
Vacuolar protein sorting-associated protein 29	Vps29	Q9QZ88	0	0	0	0	0	0.000443797	0.00030507	0.000298308	-26.5754	-26.5754	-26.5754	-26.5754	-26.5754	-11.1378	-11.6785	-11.7109	0.0577528	0	3	3	NA	NA	0.368458	0.368458
Enoyl-CoA delta isomerase 2	Eci2	Q9WUR2	0.000253132	0.000119791	0	0.000253798	0.0003167	0.000309626	0.000378381	0.000323745	-11.9478	-13.0271	-26.5754	-11.944	-11.6245	-11.6571	-11.3678	-11.5928	0.321343	3	4	7	Inf	Inf	0.54268	0.54268
Nicotinamide phosphoribosyltransferase	Nampt	Q99KQ4	0	0	0	0	9.90409e-05	0.000121036	0	7.2317e-05	-26.5754	-26.5754	-26.5754	-26.5754	-13.3015	-13.0122	-26.5754	-13.7551	0.0578164	0	3	3	NA	NA	0.368458	0.368458
Clathrin heavy chain 1	Cltc	Q68FD5	0	0.000147555	5.0144e-05	0.000156311	0.000184412	0.00020803	0.000190668	0.0001968	-26.5754	-12.7264	-14.2833	-12.6432	-12.4047	-12.2309	-12.3566	-12.3109	0.293725	3	4	7	Inf	Inf	0.54268	0.54268
Myomesin-1	Myom1	Q62234	5.88361e-05	0.000153139	0.000169134	0.000221216	0.000279723	0.000203907	0.000274837	0.000365494	-14.0527	-12.6728	-12.5295	-12.1422	-11.8037	-12.2597	-11.8291	-11.4178	0.0907957	4	4	8	2.34074	1.22697	0.478645	0.478645
Ig gamma-2A chain C region, membrane-bound form	Igh-1a	P01865	0	0	0	0	0	0.00035302	0.000462227	0.000271189	-26.5754	-26.5754	-26.5754	-26.5754	-26.5754	-11.4679	-11.0791	-11.8484	0.057788	0	3	3	NA	NA	0.368458	0.368458
Rho guanine nucleotide exchange factor 5	Arhgef5	E9Q7D5	0	0	0	0	0	0.000100293	5.74519e-05	7.86498e-05	-26.5754	-26.5754	-26.5754	-26.5754	-26.5754	-13.2833	-14.087	-13.634	0.057848	0	3	3	NA	NA	0.368458	0.368458
Bifunctional glutamate/proline--tRNA ligase	Eprs1	Q8CGC7	0	9.09005e-05	5.66332e-05	9.62941e-05	0.000112149	0.000130529	0.000119635	0.000128682	-26.5754	-13.4252	-14.1077	-13.342	-13.1222	-12.9032	-13.029	-12.9238	0.313126	3	4	7	Inf	Inf	0.54268	0.54268
Transforming protein RhoA	Rhoa	Q9QUI0	0.000329839	0.000351206	0	0	0.000371403	0.000403452	0.000554672	0.000542377	-11.5659	-11.4754	-26.5754	-26.5754	-11.3947	-11.2753	-10.8161	-10.8484	0.174272	2	4	6	Inf	Inf	0.542371	0.542371
Elongation factor G, mitochondrial	Gfm1	Q8K0D5	0	0	8.59611e-05	6.49603e-05	9.72723e-05	0.000105666	0.000242119	0.000142051	-26.5754	-26.5754	-13.5058	-13.9099	-13.3275	-13.2081	-12.0119	-12.7812	0.125349	2	4	6	Inf	Inf	0.542371	0.542371
Galectin-1	Lgals1	P16045	0	0	0.000802304	0	0.0007263	0.000739662	0.000677932	0.000928068	-26.5754	-26.5754	-10.2835	-26.5754	-10.4271	-10.4008	-10.5265	-10.0735	0.0604811	1	4	5	Inf	Inf	0.36867	0.36867
Trifunctional enzyme subunit beta, mitochondrial	Hadhb	Q99JY0	0.00469535	0.00459552	0.00509699	0.00524268	0.0060347	0.00526465	0.00574249	0.00526425	-7.73455	-7.76555	-7.61614	-7.57548	-7.3725	-7.56944	-7.44411	-7.56955	0.0857404	4	4	8	1.1404	0.189543	0.465448	0.465448
NADH dehydrogenase [ubiquinone] iron-sulfur protein 5	Ndufs5	Q99LY9	0.0133965	0.00970771	0.00870191	0.00881462	0.00858989	0.0058035	0.00594494	0.00642509	-6.222	-6.68665	-6.84445	-6.82588	-6.86314	-7.42886	-7.39412	-7.28207	0.00229724	4	4	8	0.662779	-0.5934	0.0672964	0.0672964
NADH dehydrogenase [ubiquinone] 1 beta subcomplex subunit 1	Ndufb1	P0DN34	0	0	0	0	0	0.000633996	0.00116217	0.000852307	-26.5754	-26.5754	-26.5754	-26.5754	-26.5754	-10.6232	-9.74895	-10.1963	0.0577997	0	3	3	NA	NA	0.368458	0.368458
Microtubule-associated proteins 1A/1B light chain 3A	Map1lc3a	Q91VR7	0	0	0	0	0	0.000475497	0.000290542	0.000284102	-26.5754	-26.5754	-26.5754	-26.5754	-26.5754	-11.0382	-11.7489	-11.7813	0.0578119	0	3	3	NA	NA	0.368458	0.368458
CAP-Gly domain-containing linker protein 1	Clip1	Q922J3	0	0	0	0	0	4.26728e-05	2.60743e-05	2.54964e-05	-26.5754	-26.5754	-26.5754	-26.5754	-26.5754	-14.516	-15.2265	-15.2588	0.0579107	0	3	3	NA	NA	0.368458	0.368458
28S ribosomal protein S29, mitochondrial	Dap3	Q9ER88	0	0	0	0	0.00012105	0	0.000225977	0.000220969	-26.5754	-26.5754	-26.5754	-26.5754	-13.012	-26.5754	-12.1115	-12.1438	0.0579083	0	3	3	NA	NA	0.368458	0.368458
Insulin-degrading enzyme	Ide	Q9JHR7	0.000368972	0.000218264	0.000183578	6.93644e-05	0	7.52198e-05	6.89423e-05	0	-11.4042	-12.1616	-12.4112	-13.8152	-26.5754	-13.6983	-13.824	-26.5754	0.124026	4	2	6	0.180044	-2.47358	0.542371	0.542371
Single-stranded DNA-binding protein, mitochondrial	Ssbp1	Q9CYR0	0.0130189	0.0146956	0.0128841	0.0128392	0.0115353	0.0126613	0.0107672	0.00900772	-6.26324	-6.08847	-6.27827	-6.2833	-6.43779	-6.30343	-6.53722	-6.79462	0.0314404	4	4	8	0.821222	-0.284155	0.367611	0.367611
Superoxide dismutase [Mn], mitochondrial	Sod2	P09671	0.000870774	0.00113323	0.00125159	0.00109133	0.00163417	0.00133139	0.00154569	0.00119323	-10.1654	-9.78534	-9.64201	-9.83968	-9.25721	-9.55284	-9.33753	-9.7109	0.110505	4	4	8	1.34498	0.42758	0.527647	0.527647
Ig kappa chain V-V region MOPC 21	NA	P01634	0.000725645	0.000515103	0.000481382	0.000545667	0	0.000443797	0.000406759	0	-10.4284	-10.9228	-11.0205	-10.8397	-26.5754	-11.1378	-11.2635	-26.5754	0.172731	4	2	6	0.426638	-1.22892	0.542371	0.542371
60S ribosomal protein L32	Rpl32	P62911	0	0	0	0	0	0.00041606	0.000508449	0.00024859	-26.5754	-26.5754	-26.5754	-26.5754	-26.5754	-11.2309	-10.9416	-11.9739	0.0578946	0	3	3	NA	NA	0.368458	0.368458
Ig kappa chain V-V region L6 (Fragment)	NA	P01638	0.00251185	0.00178305	0.00166632	0.00209872	0.00167608	0.00119484	0.00140801	0.00152978	-8.63703	-9.13143	-9.22911	-8.89627	-9.22069	-9.70896	-9.47211	-9.35245	0.010003	4	4	8	0.727818	-0.45835	0.165868	0.165868
NADH dehydrogenase [ubiquinone] 1 subunit C2	Ndufc2	Q9CQ54	0.00129579	0.00110379	0.000859611	0.000779524	0.00136181	0.00126799	0.00159798	0.00127846	-9.59194	-9.8233	-10.184	-10.3251	-9.52025	-9.62323	-9.28952	-9.61137	0.0983206	4	4	8	1.42468	0.510638	0.498158	0.498158
Long-chain-fatty-acid--CoA ligase 1	Acsl1	P41216	0.000697736	0.00132078	0.00163547	0.00139915	0.0019205	0.00170691	0.00177305	0.00178475	-10.485	-9.56439	-9.25607	-9.48123	-9.02429	-9.19439	-9.13954	-9.13006	0.152225	4	4	8	1.60114	0.6791	0.542371	0.542371
Protein-glutamine gamma-glutamyltransferase K	Tgm1	Q9JLF6	0.000846586	0.000715421	0.000722073	0.000515352	0.000574987	0.000517763	0.000135586	0.000110484	-10.206	-10.4489	-10.4355	-10.9221	-10.7642	-10.9154	-12.8484	-13.1437	0.0734141	4	4	8	0.451266	-1.14795	0.421092	0.421092
Ig heavy chain V region 36-65	NA	P01747	0.00195366	0.0011887	0.000740588	0.000839487	0.000628528	0	0.000469338	0.000458935	-8.9996	-9.71639	-10.399	-10.2182	-10.6357	-26.5754	-11.0571	-11.0894	0.295118	4	3	7	0.375535	-1.41298	0.54268	0.54268
Immunoglobulin kappa constant	Igkc	P01837	0.116103	0.152599	0.17771	0.179615	0.0896526	0.12038	0.119825	0.122969	-3.10652	-2.71218	-2.4924	-2.47702	-3.47951	-3.05433	-3.061	-3.02363	0.00429931	4	4	8	0.729984	-0.454063	0.108916	0.108916
Mitochondrial proton/calcium exchanger protein	Letm1	Q9Z2I0	0	0	0	0	0	5.34695e-05	0.000122518	9.58418e-05	-26.5754	-26.5754	-26.5754	-26.5754	-26.5754	-14.1907	-12.9946	-13.3488	0.0580753	0	3	3	NA	NA	0.368458	0.368458
Ras-related protein Rab-10	Rab10	P61027	0	0.000335937	0.000313945	0.000237246	0.000592092	0.00038591	0.000618982	0.000345864	-26.5754	-11.5395	-11.6372	-12.0413	-10.7219	-11.3394	-10.6578	-11.4975	0.333722	3	4	7	Inf	Inf	0.54268	0.54268
Protein FAM162A	Fam162a	Q9D6U8	0	0	0	0	0	0.000246554	0.000225977	0.000441937	-26.5754	-26.5754	-26.5754	-26.5754	-26.5754	-11.9858	-12.1115	-11.1438	0.0579003	0	3	3	NA	NA	0.368458	0.368458
Microsomal glutathione S-transferase 3	Mgst3	Q9CPU4	0.00042685	0.000454502	0.000707915	0.00032098	0.000640853	0.000652643	0.000717811	0.000818883	-11.1939	-11.1034	-10.4641	-11.6052	-10.6077	-10.5814	-10.4441	-10.254	0.109251	4	4	8	1.62562	0.700989	0.527181	0.527181
Progranulin	Grn	P28798	0.000979045	0.00277992	0.00355306	0.00350786	0.00082141	0.00126799	0.00112989	0.00142051	-9.99632	-8.49074	-8.13672	-8.15519	-10.2496	-9.62323	-9.78959	-9.45936	0.0356123	4	4	8	0.504518	-0.987022	0.368458	0.368458
60S ribosomal protein L8	Rpl8	P62918	0.00142537	0.00101181	0.000859611	0.00107185	0.00087545	0.000633996	0.00065372	0.000852307	-9.45443	-9.94883	-10.184	-9.86567	-10.1577	-10.6232	-10.579	-10.1963	0.0116907	4	4	8	0.699112	-0.516405	0.181309	0.181309
Cytochrome c oxidase subunit 7A2, mitochondrial	Cox7a2	P48771	0	0	0.000802304	0.000606296	0.00151312	0.00123277	0.00135586	0.000441937	-26.5754	-26.5754	-10.2835	-10.6877	-9.36824	-9.66387	-9.52656	-11.1438	0.176553	2	4	6	Inf	Inf	0.542371	0.542371
Reticulon-2	Rtn2	O70622	0	0	0	0	0	0.000174038	0.000199392	7.79889e-05	-26.5754	-26.5754	-26.5754	-26.5754	-26.5754	-12.4882	-12.292	-13.6462	0.0581882	0	3	3	NA	NA	0.368458	0.368458
T-complex protein 1 subunit alpha	Tcp1	P11983	0	0	0	0	0	7.39662e-05	0.000169483	0.000198872	-26.5754	-26.5754	-26.5754	-26.5754	-26.5754	-13.7226	-12.5265	-12.2958	0.058241	0	3	3	NA	NA	0.368458	0.368458
Fructose-bisphosphate aldolase A	Aldoa	P05064	0.00241882	0.00191513	0.00166632	0.00153906	0.00216493	0.00233278	0.00260743	0.00295758	-8.69148	-9.02834	-9.22911	-9.34373	-8.85146	-8.74373	-8.58315	-8.40136	0.169487	4	4	8	1.39989	0.485319	0.542371	0.542371
Dynactin subunit 3	Dctn3	Q9Z0Y1	0	0.000367931	0	0	0.000389089	0.000422664	0.000193695	0.000378803	-26.5754	-11.4082	-26.5754	-26.5754	-11.3276	-11.2082	-12.3339	-11.3662	0.0555009	1	4	5	Inf	Inf	0.368458	0.368458
NADH dehydrogenase [ubiquinone] 1 alpha subcomplex subunit 5	Ndufa5	Q9CPP6	0.00195366	0.00138682	0.00296235	0.00104936	0.00314264	0.00324313	0.00265958	0.00260063	-8.9996	-9.494	-8.39904	-9.89626	-8.3138	-8.26839	-8.55458	-8.58692	0.107482	4	4	8	1.83081	0.872481	0.524188	0.524188
Ryanodine receptor 2	Ryr2	E9Q401	0	0	0	0	0	7.85481e-06	2.15978e-05	1.40794e-05	-26.5754	-26.5754	-26.5754	-26.5754	-26.5754	-16.9562	-15.4981	-16.115	0.0585816	0	3	3	NA	NA	0.368458	0.368458
14-3-3 protein zeta/delta	Ywhaz	P63101	0.00285075	0.00101181	0.000945572	0.00165649	0.00262635	0.00253598	0.00254225	0.00326718	-8.45444	-9.94883	-10.0465	-9.23765	-8.57272	-8.62323	-8.61967	-8.25773	0.083658	4	4	8	2.02215	1.01589	0.459615	0.459615
Collagen alpha-2(I) chain	Col1a2	Q01149	0	0	0	0	8.38038e-05	0	3.12892e-05	9.17869e-05	-26.5754	-26.5754	-26.5754	-26.5754	-13.5425	-26.5754	-14.9635	-13.4112	0.0585263	0	3	3	NA	NA	0.368458	0.368458
Guanine nucleotide-binding protein G(I)/G(S)/G(T) subunit beta-2	Gnb2	P62880	0.00029418	0.000208825	0.000260207	0.000294955	0.000294446	0.000359835	0.000384772	0.000537491	-11.731	-12.2253	-11.908	-11.7272	-11.7297	-11.4403	-11.3437	-10.8614	0.0655358	4	4	8	1.50626	0.590971	0.385604	0.385604
28S ribosomal protein S36, mitochondrial	Mrps36	Q9CQX8	0	0	0.00087524	0.000496061	0.000742806	0.00100863	0.00147912	0.00072317	-26.5754	-26.5754	-10.158	-10.9772	-10.3947	-9.95337	-9.40103	-10.4334	0.157528	2	4	6	Inf	Inf	0.542371	0.542371
Acyl-coenzyme A thioesterase 13	Acot13	Q9CQR4	0.0106428	0.00892845	0.00930672	0.0100039	0.00853402	0.00946767	0.00650815	0.00623131	-6.55398	-6.80737	-6.74751	-6.64329	-6.87256	-6.72277	-7.26353	-7.32625	0.118814	4	4	8	0.796109	-0.328962	0.542371	0.542371
Cullin-1	Cul1	Q9WTX6	0.000524077	0.000915738	0.00109648	0.000727556	0.0004842	0.000493108	0.000632737	0.000441937	-10.8979	-10.0928	-9.83289	-10.4246	-11.0121	-10.9858	-10.6261	-11.1438	0.0370759	4	4	8	0.66172	-0.595708	0.368458	0.368458
60S ribosomal protein L26	Rpl26	P61255	0.0008537	0.00136351	0.001699	0.00128392	0.00144192	0.0018274	0.00191416	0.00222268	-10.194	-9.51845	-9.20109	-9.60522	-9.43778	-9.09598	-9.02906	-8.81348	0.0356418	4	4	8	1.47176	0.557546	0.368458	0.368458
Beta-enolase	Eno3	P21550	0.00223869	0.00175354	0.00276539	0.00203174	0.00295542	0.00269111	0.00272615	0.00253879	-8.80312	-9.1555	-8.4983	-8.94306	-8.40242	-8.53758	-8.51891	-8.62164	0.0886285	4	4	8	1.27255	0.347723	0.47472	0.47472
MICOS complex subunit Mic60	Immt	Q8CAQ8	0.00185731	0.0028208	0.00312325	0.00237105	0.00314514	0.0030379	0.0034623	0.00319615	-9.07257	-8.46967	-8.32273	-8.72025	-8.31266	-8.36271	-8.17405	-8.28944	0.096338	4	4	8	1.30672	0.385954	0.493597	0.493597
Heat shock protein HSP 90-beta	Hsp90ab1	P11499	0.00074313	0.000961939	0.000985964	0.000690301	0.00101726	0.00112286	0.00129869	0.00191684	-10.3941	-10.0218	-9.98616	-10.5005	-9.94109	-9.79859	-9.58872	-9.02705	0.11006	4	4	8	1.65754	0.729043	0.527647	0.527647
Very long-chain specific acyl-CoA dehydrogenase, mitochondrial	Acadvl	P50544	0.003015	0.00293826	0.00349172	0.00449599	0.00494856	0.00431296	0.00421082	0.00414549	-8.37362	-8.41082	-8.16184	-7.79714	-7.65877	-7.8571	-7.89168	-7.91424	0.14642	4	4	8	1.30929	0.388784	0.542371	0.542371
Protein S100-A14	S100a14	Q9D2Q8	0.00120941	0.000643878	0.000401152	0.000682083	0.000453937	0.000369831	0.000338966	0	-9.69147	-10.6009	-11.2835	-10.5177	-11.1052	-11.4008	-11.5265	-26.5754	0.312076	4	3	7	0.448675	-1.15626	0.54268	0.54268
Murinoglobulin-1	Mug1	P28665	0	0	5.83494e-05	8.26768e-05	4.95204e-05	9.41388e-05	0.000110934	0.000144634	-26.5754	-26.5754	-14.0647	-13.562	-14.3013	-13.3747	-13.1379	-12.7552	0.141791	2	4	6	Inf	Inf	0.542371	0.542371
Serine/threonine-protein phosphatase PP1-beta catalytic subunit	Ppp1cb	P62141	0.00019612	0.000139217	0	0	0.000368057	0.00023989	0.000274837	0.000107498	-12.3159	-12.8103	-26.5754	-26.5754	-11.4077	-12.0253	-11.8291	-13.1833	0.146461	2	4	6	Inf	Inf	0.542371	0.542371
Carnitine O-palmitoyltransferase 2, mitochondrial	Cpt2	P52825	0	6.96085e-05	9.75775e-05	0	0.000147223	0.000119945	8.24512e-05	8.06237e-05	-26.5754	-13.8102	-13.3229	-26.5754	-12.7296	-13.0252	-13.5659	-13.5983	0.169888	2	4	6	Inf	Inf	0.542371	0.542371
Hemoglobin subunit alpha	Hba	P01942	0.00653081	0.00738314	0.00834396	0.00727556	0.00817087	0.00784041	0.010169	0.00901552	-7.25852	-7.08155	-6.90505	-7.10272	-6.93529	-6.99485	-6.61968	-6.79337	0.0200619	4	4	8	1.19273	0.254273	0.265166	0.265166
Desmoplakin	Dsp	E9Q557	0.00403136	0.00184849	0.00256593	0.00262182	0.00232285	0.0017392	0.0012215	0.000537491	-7.95451	-9.07943	-8.6063	-8.57521	-8.74988	-9.16735	-9.67712	-10.8614	0.103663	4	4	8	0.549531	-0.863726	0.513806	0.513806
Citrate synthase, mitochondrial	Cs	Q9CZU6	0.000488415	0.000396233	0.000786875	0.000682083	0.000942793	0.000810783	0.000821341	0.000688402	-10.9996	-11.3013	-10.3116	-10.5177	-10.0508	-10.2684	-10.2497	-10.5044	0.159235	4	4	8	1.5074	0.592063	0.542371	0.542371
Cytochrome c1, heme protein, mitochondrial	Cyc1	Q9D0M3	0.00300624	0.00228117	0.00192553	0.00249448	0.00256799	0.00304318	0.00337029	0.00392061	-8.37782	-8.776	-9.02052	-8.64704	-8.60514	-8.3602	-8.21291	-7.9947	0.16822	4	4	8	1.37758	0.462131	0.542371	0.542371
LIM domain-binding protein 3	Ldb3	Q9JKS4	0.000811577	0.00128776	0.00133013	0.00114877	0.00172018	0.00122628	0.00149859	0.00149154	-10.267	-9.60091	-9.5542	-9.76568	-9.18321	-9.67148	-9.38217	-9.38897	0.214158	4	4	8	1.37421	0.458602	0.54268	0.54268
Fatty acid-binding protein 5	Fabp5	Q05816	0.000483763	0.000343402	0.000320921	0.000363778	0.00036315	0	0.000271173	0	-11.0134	-11.5078	-11.6054	-11.4246	-11.4271	-26.5754	-11.8484	-26.5754	0.16817	4	2	6	0.398915	-1.32585	0.542371	0.542371
Prohibitin	Phb	P67778	0.000483763	0.000515103	0.000320921	0.000454722	0.000453937	0.000221899	0.000271173	0.000198872	-11.0134	-10.9228	-11.6054	-11.1027	-11.1052	-12.1377	-11.8484	-12.2958	0.107021	4	4	8	0.662865	-0.593213	0.524188	0.524188
Acetyl-coenzyme A synthetase 2-like, mitochondrial	Acss1	Q99NB1	0.000193505	0.000446422	0.000577659	0.000509289	0.00065367	0.000562143	0.000650815	0.000609873	-12.3353	-11.1293	-10.7575	-10.9392	-10.5791	-10.7967	-10.5854	-10.6792	0.192988	4	4	8	1.74035	0.799378	0.54268	0.54268
39S ribosomal protein L22, mitochondrial	Mrpl22	Q8BU88	0.000302352	0.000429252	0.000300864	0	0.000453937	0.000462289	0.000508449	0.000414316	-11.6914	-11.1859	-11.6986	-26.5754	-11.1052	-11.0789	-10.9416	-11.2369	0.340881	3	4	7	Inf	Inf	0.54268	0.54268
Ferritin light chain 1	Ftl1	P29391	0	0.000367931	0.000343844	0	0.000259393	0.000633996	0.000677932	0.000378803	-26.5754	-11.4082	-11.5059	-26.5754	-11.9125	-10.6232	-10.5265	-11.3662	0.146464	2	4	6	Inf	Inf	0.542371	0.542371
AFG3-like protein 2	Afg3l2	Q8JZQ2	0	8.58505e-05	0.000294178	0.000151574	0.000272362	0.000295865	0.000225977	0.000287259	-26.5754	-13.5076	-11.731	-12.6876	-11.8421	-11.7227	-12.1115	-11.7653	0.312115	3	4	7	Inf	Inf	0.54268	0.54268
Propionyl-CoA carboxylase beta chain, mitochondrial	Pccb	Q99MN9	0	0.000133216	0.000124495	0	0.000234795	7.65167e-05	0.000210393	0.000171441	-26.5754	-12.8738	-12.9715	-26.5754	-12.0562	-13.6737	-12.2146	-12.5099	0.18367	2	4	6	Inf	Inf	0.542371	0.542371
Calcium-binding mitochondrial carrier protein Aralar1	Slc25a12	Q8BH59	0.000628892	0.00120191	0.00141205	0.00116409	0.00156154	0.00142015	0.00162704	0.00132581	-10.6349	-9.70045	-9.46798	-9.74657	-9.3228	-9.45973	-9.26353	-9.5589	0.175772	4	4	8	1.48894	0.574286	0.542371	0.542371
Mitochondrial pyruvate carrier 2	Mpc2	Q9D023	0.00259159	0.00183965	0.00292268	0.00194881	0.00291817	0.00253598	0.00348651	0.00312513	-8.59194	-9.08634	-8.41849	-9.00318	-8.42072	-8.62323	-8.164	-8.32187	0.0412887	4	4	8	1.32526	0.406278	0.368458	0.368458
Arginase-1	Arg1	Q61176	0.000621981	0.000294344	0.00061892	0.000233857	0.000233453	0.000316998	0.000174325	0	-10.6508	-11.7302	-10.6579	-12.062	-12.0645	-11.6232	-12.4858	-26.5754	0.284337	4	3	7	0.43349	-1.20593	0.54268	0.54268
Propionyl-CoA carboxylase alpha chain, mitochondrial	Pcca	Q91ZA3	0	0.000289745	0.000481382	0.000477458	0.00057877	0.000499272	0.000635562	0.000522038	-26.5754	-11.7529	-11.0205	-11.0323	-10.7547	-10.9679	-10.6197	-10.9035	0.346764	3	4	7	Inf	Inf	0.54268	0.54268
Mitochondrial import receptor subunit TOM22 homolog	Tomm22	Q9CPQ3	0.000453528	0.000321939	0	0.000341042	0.000340453	0.000693433	0.000635562	0.000497179	-11.1065	-11.6009	-26.5754	-11.5177	-11.5202	-10.4939	-10.6197	-10.9739	0.350743	3	4	7	Inf	Inf	0.54268	0.54268
Cytochrome c oxidase subunit 5B, mitochondrial	Cox5b	P19536	0.00155495	0.00128776	0.00275076	0.00272833	0.00233453	0.00301148	0.00334124	0.00355128	-9.3289	-9.60091	-8.50595	-8.51776	-8.74264	-8.37531	-8.2254	-8.13744	0.0618633	4	4	8	1.58905	0.668163	0.37118	0.37118
NADH dehydrogenase [ubiquinone] 1 beta subcomplex subunit 9	Ndufb9	Q9CQJ8	0	0	0	0	0.000371403	0.000201726	0.000739562	0	-26.5754	-26.5754	-26.5754	-26.5754	-11.3947	-12.2752	-10.401	-26.5754	0.0583666	0	3	3	NA	NA	0.368458	0.368458
Ig gamma-2B chain C region	Igh-3	P01867	0.00247379	0.00427301	0.00361037	0.00403049	0.00142371	0.00302589	0.0028658	0.00257629	-8.65906	-7.87053	-8.11364	-7.95482	-9.45612	-8.36842	-8.44684	-8.60048	0.0106068	4	4	8	0.679157	-0.558182	0.172739	0.172739
Adenylate kinase isoenzyme 1	Ak1	Q9R0Y5	0.00115444	0.00105362	0.00120346	0.000496061	0.00148561	0.00121036	0.00138668	0.00126555	-9.75858	-9.89042	-9.69859	-10.9772	-9.39472	-9.69034	-9.49414	-9.62601	0.151062	4	4	8	1.53477	0.618022	0.542371	0.542371
ADP/ATP translocase 1	Slc25a4	P48962	0.0155024	0.0131898	0.0152438	0.0133936	0.0160116	0.0158019	0.0180577	0.0148852	-6.01136	-6.24444	-6.03564	-6.22231	-5.96474	-5.98376	-5.79125	-6.06997	0.0375155	4	4	8	1.13171	0.178506	0.368458	0.368458
Dynamin-1-like protein	Dnm1l	Q8K1M6	0	6.20606e-05	0	0	9.84442e-05	0	9.80143e-05	0.000119802	-26.5754	-13.9757	-26.5754	-26.5754	-13.3102	-26.5754	-13.3165	-13.0269	0.367577	1	3	4	Inf	Inf	0.54268	0.54268
14-3-3 protein sigma	Sfn	O70456	0.00220285	0.000551896	0	0.00107185	0	0	0	0	-8.82641	-10.8233	-26.5754	-9.86567	-26.5754	-26.5754	-26.5754	-26.5754	0.0583233	3	0	3	NA	NA	0.368458	0.368458
Aldo-keto reductase family 1 member B1	Akr1b1	P45376	0.000302352	0.00035771	0.000267435	0	0.000453937	0.000308192	0.000508449	0.000386695	-11.6914	-11.4489	-11.8685	-26.5754	-11.1052	-11.6638	-10.9416	-11.3365	0.346283	3	4	7	Inf	Inf	0.54268	0.54268
Golgin subfamily A member 4	Golga4	Q91VW5	2.81258e-05	0.000898435	0.000998215	0.00108922	0	0.000335428	0.000354732	0.000246663	-15.1172	-10.1203	-9.96835	-9.84248	-26.5754	-11.5417	-11.4609	-11.9851	0.190346	4	3	7	0.238793	-2.06617	0.54268	0.54268
Calcium-binding mitochondrial carrier protein Aralar2	Slc25a13	Q9QXX4	0.00029418	0.000870106	0.000650516	0.000774257	0.00110417	0.000839616	0.00107187	0.000779362	-11.731	-10.1665	-10.5861	-10.3349	-9.82281	-10.218	-9.86565	-10.3254	0.250808	4	4	8	1.84316	0.882183	0.54268	0.54268
Translationally-controlled tumor protein	Tpt1	P63028	0	0.000542213	0	0	0.000430046	0.000233577	0.000642252	0.000523347	-26.5754	-10.8488	-26.5754	-26.5754	-11.1832	-12.0637	-10.6046	-10.8999	0.0730848	1	4	5	Inf	Inf	0.421092	0.421092
Keratin, type II cytoskeletal 2 oral	Krt76	Q3UV17	0.00524077	0.00327049	0.00355306	0.00181889	0.00324241	0.00211332	0.000225977	0	-7.576	-8.25627	-8.13672	-9.10272	-8.26871	-8.88627	-12.1115	-26.5754	0.250207	4	3	7	0.332117	-1.59024	0.54268	0.54268
Vigilin	Hdlbp	Q8VDJ3	0	0	3.39002e-05	0	0	4.688e-05	5.72901e-05	5.60202e-05	-26.5754	-26.5754	-14.8479	-26.5754	-26.5754	-14.3804	-14.0911	-14.1234	0.163081	1	3	4	NA	NA	0.542371	0.542371
Cytochrome c oxidase subunit 2	Mtco2	P00405	0.000837283	0.000891524	0.000833161	0.000734551	0.00167608	0.000853456	0.00148624	0.000917869	-10.222	-10.1314	-10.2291	-10.4108	-9.22069	-10.1944	-9.39411	-10.0894	0.120387	4	4	8	1.49813	0.583163	0.542371	0.542371
Dynein light chain 2, cytoplasmic	Dynll2	Q9D0M5	0.00108847	0.00103021	0.000962764	0.00136417	0.00108945	0.000887594	0.000813519	0.000596615	-9.84347	-9.92284	-10.0205	-9.51775	-9.84217	-10.1378	-10.2635	-10.7109	0.218647	4	4	8	0.7862	-0.347031	0.54268	0.54268
60S ribosomal protein L13a	Rpl13a	P19253	0	0	0.000209297	0	0.000236837	0	0.000530556	0.000518796	-26.5754	-26.5754	-12.2221	-26.5754	-12.0438	-26.5754	-10.8802	-10.9125	0.155738	1	3	4	NA	NA	0.542371	0.542371
Caveolin-1	Cav1	P49817	0.000345545	0.000367931	0.000343844	0	0.000389089	0.000633996	0.000484237	0.000378803	-11.4988	-11.4082	-11.5059	-26.5754	-11.3276	-10.6232	-11.012	-11.3662	0.340424	3	4	7	Inf	Inf	0.54268	0.54268
Plakophilin-1	Pkp1	P97350	0.000716686	0.000413354	0.00023772	0.000505247	0.000302625	0.000410923	5.02172e-05	7.36562e-05	-10.4464	-11.2403	-12.0384	-10.9507	-11.6901	-11.2488	-14.2812	-13.7286	0.0822468	4	4	8	0.443351	-1.17348	0.454601	0.454601
ATP-dependent RNA helicase DDX3Y	Ddx3y	Q62095	9.94034e-05	0.000105843	6.59428e-05	0.000186872	0.000223859	0.000121588	0.000167161	0.000217942	-13.2962	-13.2056	-13.8882	-12.3856	-12.1251	-13.0056	-12.5464	-12.1637	0.0946123	4	4	8	1.7755	0.828225	0.491895	0.491895
Junction plakoglobin	Jup	Q02257	0.00623878	0.00389468	0.00493123	0.00568957	0.00528117	0.00392382	0.00257945	0.00152792	-7.32452	-8.00428	-7.66383	-7.45746	-7.56492	-7.99352	-8.59872	-9.35421	0.170903	4	4	8	0.661405	-0.596394	0.542371	0.542371
60S ribosomal protein L11	Rpl11	Q9CXW4	0.00108847	0.00103021	0.00108311	0.000682083	0.00122563	0.00122044	0.0010169	0.00129267	-9.84347	-9.92284	-9.85059	-10.5177	-9.67225	-9.67837	-9.94159	-9.59542	0.244448	4	4	8	1.28618	0.363091	0.54268	0.54268
Prostamide/prostaglandin F synthase	Prxl2b	Q9DB60	0.000494758	0.000468275	0.000328215	0	0.000742806	0.000605178	0.000647117	0.000361585	-10.981	-11.0603	-11.573	-26.5754	-10.3947	-10.6903	-10.5937	-11.4333	0.32397	3	4	7	Inf	Inf	0.54268	0.54268
40S ribosomal protein S19	Rps19	Q9CZX8	0.00385499	0.00354133	0.0033095	0.0040925	0.00374498	0.00263504	0.00330492	0.00223731	-8.01905	-8.14149	-8.23917	-7.9328	-8.06082	-8.56795	-8.24116	-8.80401	0.196511	4	4	8	0.815212	-0.294753	0.54268	0.54268
Cytochrome c oxidase subunit 4 isoform 1, mitochondrial	Cox4i1	P19783	0.00290258	0.00321939	0.00276795	0.00190983	0.00313217	0.00377227	0.00325407	0.00308251	-8.42844	-8.27899	-8.49696	-9.03233	-8.31862	-8.05035	-8.26353	-8.34167	0.0907501	4	4	8	1.26012	0.333561	0.478645	0.478645
PDZ and LIM domain protein 5	Pdlim5	Q8CI51	0.001267	0.00118555	0.00114615	0.00134251	0.00103757	0.0011271	0.00122673	0.00110484	-9.62436	-9.72021	-9.76898	-9.54084	-9.91256	-9.79315	-9.67095	-9.82193	0.238216	4	4	8	0.915724	-0.127016	0.54268	0.54268
40S ribosomal protein S5	Rps5	P97461	0	0.000223958	0	0	0.000355255	0.00038591	0.000265278	0	-26.5754	-12.1244	-26.5754	-26.5754	-11.4588	-11.3394	-11.8802	-26.5754	0.165655	1	3	4	NA	NA	0.542371	0.542371
NADH-ubiquinone oxidoreductase 75 kDa subunit, mitochondrial	Ndufs1	Q91VD9	0.00176876	0.00238235	0.002437	0.00221677	0.00279171	0.00274599	0.00251682	0.00223731	-9.14304	-8.71339	-8.68067	-8.81732	-8.48463	-8.50845	-8.63417	-8.80401	0.218093	4	4	8	1.19325	0.254898	0.54268	0.54268
Sorting and assembly machinery component 50 homolog	Samm50	Q8BGH2	0.000348868	0.000198116	0.000185147	0.000157404	0.000366642	0.00029871	0.00027378	0.000305956	-11.485	-12.3013	-12.399	-12.6331	-11.4133	-11.7089	-11.8346	-11.6743	0.0575336	4	4	8	1.4953	0.58043	0.368458	0.368458
NADH dehydrogenase [ubiquinone] iron-sulfur protein 6, mitochondrial	Ndufs6	P52503	0.00111638	0.000594349	0.00203662	0.00209872	0.00272362	0.0018776	0.00265958	0.00183574	-9.80695	-10.7164	-8.9396	-8.89627	-8.52025	-9.05688	-8.55458	-9.08942	0.159718	4	4	8	1.94484	0.959652	0.542371	0.542371
ADP-ribosylation factor 3	Arf3	P61205	0.00103664	0.000735861	0.000458459	0.000259841	0.000907874	0.00105666	0.00116217	0.000757606	-9.91386	-10.4083	-11.0909	-11.91	-10.1052	-9.88626	-9.74895	-10.3662	0.137035	4	4	8	1.94058	0.956491	0.542371	0.542371
Acyl-CoA dehydrogenase family member 10	Acad10	Q8K370	0.000121957	0.000108215	0	6.87815e-05	0.000205988	0.000111882	0.000119635	0.000116983	-13.0012	-13.1737	-26.5754	-13.8274	-12.2451	-13.1256	-13.029	-13.0613	0.330249	3	4	7	Inf	Inf	0.54268	0.54268
Methylmalonate-semialdehyde dehydrogenase [acylating], mitochondrial	Aldh6a1	Q9EQ20	0.000500445	0.000222027	0.000331988	0.000282241	0.000328713	0.000191292	0.000140262	0.000137153	-10.9645	-12.1369	-11.5565	-11.7907	-11.5708	-12.3519	-12.7995	-12.8318	0.0429893	4	4	8	0.606711	-0.720918	0.368458	0.368458
Cytochrome c oxidase subunit 7A1, mitochondrial	Cox7a1	P56392	0.00201568	0.00143084	0.00133717	0.00181889	0.00181575	0.000986216	0	0.000883874	-8.95451	-9.44891	-9.54659	-9.10272	-9.10521	-9.98579	-26.5754	-10.1439	0.337427	4	3	7	0.519002	-0.946187	0.54268	0.54268
Cytochrome b-c1 complex subunit 7	Uqcrb	Q9D855	0.00103664	0.000919826	0.00137538	0.000779524	0.000972723	0.00142649	0.00174325	0.00142051	-9.91386	-10.0863	-9.50595	-10.3251	-10.0057	-9.4533	-9.16399	-9.45936	0.124304	4	4	8	1.39473	0.479988	0.542371	0.542371
Tubulin beta-4B chain	Tubb4b	P68372	0.00195924	0.000721144	0.00052952	0.000873067	0.00174312	0.00155329	0.00126095	0.00226714	-8.99548	-10.4374	-10.883	-10.1616	-9.1641	-9.33045	-9.63126	-8.78491	0.0882667	4	4	8	2.00542	1.0039	0.47472	0.47472
Ras-related protein R-Ras2	Rras2	P62071	0	0.000223958	0.000209297	0.00035587	0	0	0.000176852	0	-26.5754	-12.1244	-12.2221	-11.4563	-26.5754	-26.5754	-12.4651	-26.5754	0.176686	3	1	4	NA	NA	0.542371	0.542371
Immunoglobulin heavy constant mu	Ighm	P01872	0.00246719	0.0029876	0.00332154	0.00349227	0.00228784	0.00252964	0.00301002	0.00250578	-8.66291	-8.38679	-8.23393	-8.16162	-8.77179	-8.62684	-8.37601	-8.64052	0.0624461	4	4	8	0.849439	-0.235417	0.372228	0.372228
Ig kappa chain V-V region L7 (Fragment)	Gm10881	P01642	0.000837283	0.000396233	0.000740588	0.00125923	0.000628528	0.000341382	0.000625784	0	-10.222	-11.3013	-10.399	-9.63323	-10.6357	-11.5163	-10.642	-26.5754	0.363159	4	3	7	0.614307	-0.702968	0.54268	0.54268
Coatomer subunit alpha	Copa	Q8CIE6	0	3.73263e-05	6.97655e-05	7.90821e-05	5.92092e-05	9.64776e-05	7.36883e-05	0.000100877	-26.5754	-14.7091	-13.8069	-13.6261	-14.0436	-13.3393	-13.728	-13.275	0.317626	3	4	7	Inf	Inf	0.54268	0.54268
Ig kappa chain V-II region 26-10	NA	P01631	0.00211646	0.00214626	0.00160461	0.00250097	0.00136181	0.00203407	0.00169483	0.00165726	-8.88412	-8.86395	-9.28356	-8.64329	-9.52025	-8.94141	-9.20463	-9.23697	0.187927	4	4	8	0.82751	-0.273152	0.542371	0.542371
Alpha-1-antitrypsin 1-5	Serpina1e	Q00898	0.000157749	0	0.000156972	0.000118623	0.000236837	0.000192955	0.000132639	0.000172932	-12.63	-26.5754	-12.6371	-13.0412	-12.0438	-12.3394	-12.8801	-12.4974	0.358002	3	4	7	Inf	Inf	0.54268	0.54268
Thioredoxin-dependent peroxide reductase, mitochondrial	Prdx3	P20108	0.000777477	0.000643878	0.000601728	0.000389762	0.000972723	0.000554746	0.000871627	0.000852307	-10.3289	-10.6009	-10.6986	-11.3251	-10.0057	-10.8159	-10.164	-10.1963	0.209091	4	4	8	1.43699	0.523054	0.54268	0.54268
Succinate dehydrogenase cytochrome b560 subunit, mitochondrial	Sdhc	Q9CZB0	0.000403136	0.000429252	0.000802304	0.000454722	0.00060525	0.000739662	0.00112989	0.000662906	-11.2764	-11.1859	-10.2835	-11.1027	-10.6902	-10.4008	-9.78959	-10.5589	0.00251655	4	4	8	1.52266	0.60659	0.0695483	0.0695483
Heterogeneous nuclear ribonucleoprotein H	Hnrnph1	O35737	0	0	0	0	0	0	8.30121e-05	8.11721e-05	-26.5754	-26.5754	-26.5754	-26.5754	-26.5754	-26.5754	-13.5561	-13.5885	0.181691	0	2	2	NA	NA	0.542371	0.542371
LIM and SH3 domain protein 1	Lasp1	Q61792	0	0	0	0	0	0	0.00020338	0.000198872	-26.5754	-26.5754	-26.5754	-26.5754	-26.5754	-26.5754	-12.2635	-12.2958	0.181691	0	2	2	NA	NA	0.542371	0.542371
Band 3 anion transport protein	Slc4a1	P04919	0	0	0	0	0	0	3.94912e-05	3.86159e-05	-26.5754	-26.5754	-26.5754	-26.5754	-26.5754	-26.5754	-14.6277	-14.6601	0.181691	0	2	2	NA	NA	0.542371	0.542371
Amine oxidase [flavin-containing] B	Maob	Q8BW75	0	0	0	0	0	0	0.000103413	0.000101121	-26.5754	-26.5754	-26.5754	-26.5754	-26.5754	-26.5754	-13.2391	-13.2715	0.181691	0	2	2	NA	NA	0.542371	0.542371
Acyl-coenzyme A thioesterase 9, mitochondrial	Acot9	Q9R0X4	0	0	0	0	0	0	7.97567e-05	7.79889e-05	-26.5754	-26.5754	-26.5754	-26.5754	-26.5754	-26.5754	-13.6139	-13.6462	0.181691	0	2	2	NA	NA	0.542371	0.542371
Ras-related protein Rap-1b	Rap1b	Q99JI6	0	0	0	0	0	0	0.000193695	0.000189402	-26.5754	-26.5754	-26.5754	-26.5754	-26.5754	-26.5754	-12.3339	-12.3662	0.181691	0	2	2	NA	NA	0.542371	0.542371
14-3-3 protein eta	Ywhah	P68510	0	0	0	0	0	0.00118874	0	0.00113641	-26.5754	-26.5754	-26.5754	-26.5754	-26.5754	-9.71634	-26.5754	-9.78129	0.181691	0	2	2	NA	NA	0.542371	0.542371
Ubiquitin-conjugating enzyme E2 N	Ube2n	P61089	0	0.000303002	0	0.00032098	0	0	0	0	-26.5754	-11.6883	-26.5754	-11.6052	-26.5754	-26.5754	-26.5754	-26.5754	0.181693	2	0	2	NA	NA	0.542371	0.542371
Alpha-actinin-1	Actn1	Q7TPR4	0	0	0	0	0	0	0.000414658	0.000444082	-26.5754	-26.5754	-26.5754	-26.5754	-26.5754	-26.5754	-11.2358	-11.1369	0.181693	0	2	2	NA	NA	0.542371	0.542371
Gamma-enolase	Eno2	P17183	0	0	0	0	0	0.000236062	0	0.000253879	-26.5754	-26.5754	-26.5754	-26.5754	-26.5754	-12.0485	-26.5754	-11.9435	0.181694	0	2	2	NA	NA	0.542371	0.542371
ADP-ribosylation factor 5	Arf5	P84084	0	0	0	0	0	0.000422664	0.00038739	0	-26.5754	-26.5754	-26.5754	-26.5754	-26.5754	-11.2082	-11.3339	-26.5754	0.181695	0	2	2	NA	NA	0.542371	0.542371
NADH dehydrogenase [ubiquinone] 1 beta subcomplex subunit 8, mitochondrial	Ndufb8	Q9D6J5	0	0	0	0	0	0.000403452	0.000369781	0	-26.5754	-26.5754	-26.5754	-26.5754	-26.5754	-11.2753	-11.401	-26.5754	0.181696	0	2	2	NA	NA	0.542371	0.542371
Guanine nucleotide-binding protein G(I)/G(S)/G(O) subunit gamma-12	Gng12	Q9DAS9	0	0	0	0	0	0.000554746	0.000508449	0	-26.5754	-26.5754	-26.5754	-26.5754	-26.5754	-10.8159	-10.9416	-26.5754	0.181695	0	2	2	NA	NA	0.542371	0.542371
Methylglutaconyl-CoA hydratase, mitochondrial	Auh	Q9JLZ3	0	0	0	0	0	0.000134484	0.00012326	0	-26.5754	-26.5754	-26.5754	-26.5754	-26.5754	-12.8602	-12.9859	-26.5754	0.181697	0	2	2	NA	NA	0.542371	0.542371
Mitochondrial import inner membrane translocase subunit TIM16	Pam16	Q9CQV1	0	0	0	0	0	0.000316998	0.000290542	0	-26.5754	-26.5754	-26.5754	-26.5754	-26.5754	-11.6232	-11.7489	-26.5754	0.181696	0	2	2	NA	NA	0.542371	0.542371
Transmembrane protein 70, mitochondrial	Tmem70	Q921N7	0	0	0	0	0	0.000237748	0	0.000213077	-26.5754	-26.5754	-26.5754	-26.5754	-26.5754	-12.0382	-26.5754	-12.1963	0.1817	0	2	2	NA	NA	0.542371	0.542371
Histidine-rich glycoprotein	Hrg	Q9ESB3	0	0	0	0	0	7.52198e-05	0	6.74141e-05	-26.5754	-26.5754	-26.5754	-26.5754	-26.5754	-13.6983	-26.5754	-13.8564	0.181702	0	2	2	NA	NA	0.542371	0.542371
Ras-related protein Rab-1A	Rab1A	P62821	0	0	0	0	0.000473674	0	0.000530556	0	-26.5754	-26.5754	-26.5754	-26.5754	-11.0438	-26.5754	-10.8802	-26.5754	0.181699	0	2	2	NA	NA	0.542371	0.542371
Heat shock-related 70 kDa protein 2	Hspa2	P17156	0.00145129	0	0	0.00128621	0	0	0	0	-9.42844	-26.5754	-26.5754	-9.60264	-26.5754	-26.5754	-26.5754	-26.5754	0.181698	2	0	2	NA	NA	0.542371	0.542371
Poly(rC)-binding protein 1	Pcbp1	P60335	0.00019612	0.000208825	0.000195155	0.000221216	0.000294446	0.00023989	0.00021987	0.000483742	-12.3159	-12.2253	-12.323	-12.1422	-11.7297	-12.0253	-12.151	-11.0134	0.10154	4	4	8	1.49087	0.576158	0.509594	0.509594
Hexokinase-2	Hk2	O08528	0.000563608	0.000575115	0.00072441	0.000503285	0.000872617	0.000624763	0.000710842	0.00065647	-10.793	-10.7638	-10.4309	-10.9563	-10.1623	-10.6444	-10.4582	-10.573	0.153386	4	4	8	1.23006	0.298728	0.542371	0.542371
Protein-cysteine N-palmitoyltransferase HHAT-like protein	Hhatl	Q9D1G3	0.000194369	9.19826e-05	0	0.000146161	0.000243181	0.000158499	0.000145271	0.000213077	-12.3288	-13.4081	-26.5754	-12.7401	-12.0056	-12.6231	-12.7489	-12.1963	0.328079	3	4	7	Inf	Inf	0.54268	0.54268
Nebulin-related-anchoring protein	Nrap	Q80XB4	0	0	0	0	0	0	4.15061e-05	5.07326e-05	-26.5754	-26.5754	-26.5754	-26.5754	-26.5754	-26.5754	-14.556	-14.2664	0.181735	0	2	2	NA	NA	0.542371	0.542371
NADH dehydrogenase [ubiquinone] 1 alpha subcomplex subunit 13	Ndufa13	Q9ERS2	0.0025611	0.00166651	0.00127425	0.00176539	0.00256341	0.00300216	0.00251234	0.00175475	-8.60902	-9.22895	-9.61613	-9.14579	-8.60771	-8.37978	-8.63675	-9.15451	0.185904	4	4	8	1.44199	0.528062	0.542371	0.542371
2-oxoisovalerate dehydrogenase subunit alpha, mitochondrial	Bckdha	P50136	0.000217694	0.000206041	0.000192553	0.000272833	0.00021789	0.000266278	0.000284732	0.00027842	-12.1653	-12.2447	-12.3424	-11.8396	-12.164	-11.8747	-11.7781	-11.8104	0.175291	4	4	8	1.19811	0.260764	0.542371	0.542371
Alcohol dehydrogenase class-3	Adh5	P28474	0	0	0	0	0	0	0.000152535	0.000198872	-26.5754	-26.5754	-26.5754	-26.5754	-26.5754	-26.5754	-12.6785	-12.2958	0.181749	0	2	2	NA	NA	0.542371	0.542371
Ig gamma-3 chain C region	NA	P03987	0.0042879	0.00643878	0.00738484	0.00905311	0.00346643	0.00443797	0.00536183	0.00610175	-7.86551	-7.27899	-7.08122	-6.78737	-8.17233	-7.81588	-7.54306	-7.35656	0.00404976	4	4	8	0.724433	-0.465077	0.105525	0.105525
Actin-related protein 3	Actr3	Q99JY9	0.000154393	0	0	0.000116099	0	0	0	0	-12.661	-26.5754	-26.5754	-13.0722	-26.5754	-26.5754	-26.5754	-26.5754	0.181762	2	0	2	NA	NA	0.542371	0.542371
Adenylosuccinate lyase	Adsl	P54822	0	0	0	0	9.90409e-05	0	7.39562e-05	0	-26.5754	-26.5754	-26.5754	-26.5754	-13.3015	-26.5754	-13.7228	-26.5754	0.181773	0	2	2	NA	NA	0.542371	0.542371
MICOS complex subunit MIC13	Micos13	Q8R404	0	0	0.000555441	0.000629615	0.000628528	0.000682765	0.000625784	0.000458935	-26.5754	-26.5754	-10.8141	-10.6332	-10.6357	-10.5163	-10.642	-11.0894	0.18752	2	4	6	Inf	Inf	0.542371	0.542371
Cysteine and glycine-rich protein 1	Csrp1	P97315	0	0	0	0	0	0.000211332	0	0.000284102	-26.5754	-26.5754	-26.5754	-26.5754	-26.5754	-12.2081	-26.5754	-11.7813	0.181758	0	2	2	NA	NA	0.542371	0.542371
Cardiac phospholamban	Pln	P61014	0	0	0	0	0	0.00184915	0.00135586	0	-26.5754	-26.5754	-26.5754	-26.5754	-26.5754	-9.07891	-9.52656	-26.5754	0.181744	0	2	2	NA	NA	0.542371	0.542371
3-ketoacyl-CoA thiolase A, peroxisomal	Acaa1a	Q921H8	0	0	0	0	0.000185702	0	0	0.000135594	-26.5754	-26.5754	-26.5754	-26.5754	-12.3946	-26.5754	-26.5754	-12.8483	0.181774	0	2	2	NA	NA	0.542371	0.542371
A-kinase anchor protein 1, mitochondrial	Akap1	O08715	0	0	0	0	5.92092e-05	0	0	4.3233e-05	-26.5754	-26.5754	-26.5754	-26.5754	-14.0436	-26.5754	-26.5754	-14.4972	0.181798	0	2	2	NA	NA	0.542371	0.542371
Ras-related protein Rab-8A	Rab8a	P55258	0	0	0	0	0	0.000184915	0.000254225	0	-26.5754	-26.5754	-26.5754	-26.5754	-26.5754	-12.4008	-11.9416	-26.5754	0.181771	0	2	2	NA	NA	0.542371	0.542371
Ig kappa chain V-III region PC 6684	NA	P01670	0.00120941	0.00429252	0.00220634	0.00363778	0	0.00221899	0.00135586	0.00198872	-9.69147	-7.86395	-8.82413	-8.10272	-26.5754	-8.81588	-9.52656	-8.97394	0.312987	4	3	7	0.41954	-1.25312	0.54268	0.54268
Nesprin-1	Syne1	Q6ZWR6	0	5.10003e-06	7.14924e-06	0	0	0	0	0	-26.5754	-17.5782	-17.0918	-26.5754	-26.5754	-26.5754	-26.5754	-26.5754	0.181911	2	0	2	NA	NA	0.542371	0.542371
NADH dehydrogenase [ubiquinone] iron-sulfur protein 8, mitochondrial	Ndufs8	Q8K3J1	0.00151176	0.00107313	0.000802304	0.000795764	0.00158878	0.00110949	0.00177957	0.00124295	-9.36955	-9.86394	-10.2835	-10.2954	-9.29786	-9.81587	-9.13425	-9.65201	0.166286	4	4	8	1.46622	0.552098	0.542371	0.542371
40S ribosomal protein S3a	Rps3a	P97351	0.00205599	0.00171701	0.00136392	0.00136417	0.00181575	0.000887594	0.00108469	0.000795487	-8.92594	-9.18588	-9.51802	-9.51775	-9.10521	-10.1378	-9.84849	-10.2959	0.0544984	4	4	8	0.694625	-0.525695	0.368458	0.368458
Lon protease homolog, mitochondrial	Lonp1	Q8CGK3	0.000308057	0.000315865	0.000249774	0.00025739	0.00028264	0.000314007	0.000345362	0.000337707	-11.6645	-11.6284	-11.967	-11.9237	-11.7887	-11.6369	-11.4996	-11.5319	0.301653	4	4	8	1.15159	0.203625	0.54268	0.54268
Receptor of activated protein C kinase 1	Rack1	P68040	0.000310991	0.000294344	0	0.000155905	0.000466907	0.000316998	0.000174325	0.000511384	-11.6508	-11.7302	-26.5754	-12.647	-11.0645	-11.6232	-12.4858	-10.9333	0.304674	3	4	7	Inf	Inf	0.54268	0.54268
Glutamine amidotransferase-like class 1 domain-containing protein 3A, mitochondrial	Gatd3a	Q9D172	0.000518318	0.000367931	0.000171922	0	0.000486361	0.000475497	0.000435814	0.000426154	-10.9138	-11.4082	-12.5059	-26.5754	-11.0057	-11.0382	-11.164	-11.1963	0.336392	3	4	7	Inf	Inf	0.54268	0.54268
Annexin A2	Anxa2	P07356	0.00409338	0.00211324	0.0019749	0.00223863	0.00279346	0.00136553	0.00104297	0.000611913	-7.93249	-8.88632	-8.984	-8.80316	-8.48373	-9.51631	-9.90507	-10.6744	0.0465642	4	4	8	0.532517	-0.909101	0.368458	0.368458
Beta-parvin	Parvb	Q9ES46	0	0	0	0	0	0	9.68475e-05	0.000142051	-26.5754	-26.5754	-26.5754	-26.5754	-26.5754	-26.5754	-13.3338	-12.7812	0.181823	0	2	2	NA	NA	0.542371	0.542371
Heat shock protein 75 kDa, mitochondrial	Trap1	Q9CQN1	0	0.00016097	0.000210605	0.000204625	0.000238317	0.000221899	0.00020338	0.00024859	-26.5754	-12.6008	-12.2131	-12.2547	-12.0348	-12.1377	-12.2635	-11.9739	0.365318	3	4	7	Inf	Inf	0.54268	0.54268
Ig lambda-1 chain V region	NA	P01723	0	0	0	0	0	0.000739662	0	0.000497179	-26.5754	-26.5754	-26.5754	-26.5754	-26.5754	-10.4008	-26.5754	-10.9739	0.181794	0	2	2	NA	NA	0.542371	0.542371
Arf-GAP with SH3 domain, ANK repeat and PH domain-containing protein 1	Asap1	Q9QWY8	0	0	0	0	0	6.98893e-05	0	4.69776e-05	-26.5754	-26.5754	-26.5754	-26.5754	-26.5754	-13.8044	-26.5754	-14.3774	0.181858	0	2	2	NA	NA	0.542371	0.542371
Pyruvate carboxylase, mitochondrial	Pc	Q05920	0	7.92466e-05	9.25735e-05	0	4.19019e-05	0.000102415	0.000109512	0.000122383	-26.5754	-13.6231	-13.3989	-26.5754	-14.5423	-13.2531	-13.1565	-12.9962	0.168	2	4	6	Inf	Inf	0.542371	0.542371
60S ribosomal protein L35	Rpl35	Q6ZWV7	0	0	0.000320921	0	0.00036315	0	0.000406759	0.000928068	-26.5754	-26.5754	-11.6054	-26.5754	-11.4271	-26.5754	-11.2635	-10.0735	0.175505	1	3	4	NA	NA	0.542371	0.542371
RNA-binding protein FUS	Fus	P56959	0	0	0	0	0	0	0.000115121	7.50459e-05	-26.5754	-26.5754	-26.5754	-26.5754	-26.5754	-26.5754	-13.0844	-13.7017	0.181865	0	2	2	NA	NA	0.542371	0.542371
DNA damage-binding protein 1	Ddb1	Q3U1J4	0	0	0	0	0	0	4.80424e-05	3.13184e-05	-26.5754	-26.5754	-26.5754	-26.5754	-26.5754	-26.5754	-14.345	-14.9622	0.181903	0	2	2	NA	NA	0.542371	0.542371
Inorganic pyrophosphatase 2, mitochondrial	Ppa2	Q91VM9	0	0	0	0	0	0	0.000160563	0.000104669	-26.5754	-26.5754	-26.5754	-26.5754	-26.5754	-26.5754	-12.6045	-13.2217	0.181853	0	2	2	NA	NA	0.542371	0.542371
Cysteine and histidine-rich domain-containing protein 1	Chordc1	Q9D1P4	0	0	0	0	0	0	0.000164902	0.000107498	-26.5754	-26.5754	-26.5754	-26.5754	-26.5754	-26.5754	-12.566	-13.1833	0.181852	0	2	2	NA	NA	0.542371	0.542371
T-complex protein 1 subunit epsilon	Cct5	P80316	0	0	0	0	0	0	0.00010169	6.62906e-05	-26.5754	-26.5754	-26.5754	-26.5754	-26.5754	-26.5754	-13.2634	-13.8806	0.181869	0	2	2	NA	NA	0.542371	0.542371
Glutamine synthetase	Glul	P15105	0	0	0	0.000194881	0.000129696	0.000105666	0.000145271	0.000142051	-26.5754	-26.5754	-26.5754	-12.325	-12.9125	-13.2081	-12.7489	-12.7812	0.064086	1	4	5	Inf	Inf	0.379522	0.379522
Triosephosphate isomerase	Tpi1	P17751	0.00349385	0.00209857	0.00294178	0.00222309	0.00262275	0.00189025	0.00188315	0.00191506	-8.16096	-8.89637	-8.40909	-8.81321	-8.5747	-9.0472	-9.05263	-9.02839	0.0491579	4	4	8	0.788247	-0.34328	0.368458	0.368458
26S proteasome non-ATPase regulatory subunit 2	Psmd2	Q8VDM4	7.25645e-05	0.000103021	0.000240691	0.000109133	0.000163417	0.000155329	0.000284732	0.000238646	-13.7502	-13.2446	-12.0205	-13.1615	-12.5791	-12.6523	-11.7781	-12.0328	0.0392464	4	4	8	1.78237	0.833799	0.368458	0.368458
Lipoamide acyltransferase component of branched-chain alpha-keto acid dehydrogenase complex, mitochondrial	Dbt	P53395	0.000342285	0.000340162	0.000499548	0.00025739	0.000411113	0.000460544	0.000537229	0.000412753	-11.5125	-11.5214	-10.9671	-11.9237	-11.2481	-11.0843	-10.8621	-11.2424	0.0570743	4	4	8	1.3085	0.387919	0.368458	0.368458
NADH dehydrogenase [ubiquinone] iron-sulfur protein 3, mitochondrial	Ndufs3	Q9DCT2	0.000967527	0.000515103	0.000561613	0.00100039	0.00154339	0.00096156	0.00108469	0.000795487	-10.0134	-10.9228	-10.7981	-9.96521	-9.33968	-10.0223	-9.84849	-10.2959	0.164131	4	4	8	1.54712	0.629587	0.542371	0.542371
Desmoglein-4	Dsg4	Q7TMD7	0.000127306	0	0	7.17982e-05	0	0	0	0	-12.9393	-26.5754	-26.5754	-13.7655	-26.5754	-26.5754	-26.5754	-26.5754	0.182001	2	0	2	NA	NA	0.542371	0.542371
Eukaryotic translation initiation factor 5A-1	Eif5a	P63242	0	0	0	0	0	0.000391586	0	0.0007019	-26.5754	-26.5754	-26.5754	-26.5754	-26.5754	-11.3183	-26.5754	-10.4764	0.18192	0	2	2	NA	NA	0.542371	0.542371
Electron transfer flavoprotein-ubiquinone oxidoreductase, mitochondrial	Etfdh	Q921G7	0	0.000265126	0.00024777	0	0.000200266	0.000228425	0.000328997	0.000263213	-26.5754	-11.881	-11.9787	-26.5754	-12.2857	-12.0959	-11.5696	-11.8914	0.17766	2	4	6	Inf	Inf	0.542371	0.542371
Ubiquinone biosynthesis O-methyltransferase, mitochondrial	Coq3	Q8BMS4	0	0	0	0	0	0.000108243	0.000198419	0	-26.5754	-26.5754	-26.5754	-26.5754	-26.5754	-13.1733	-12.2991	-26.5754	0.182007	0	2	2	NA	NA	0.542371	0.542371
Lysozyme C-1	Lyz1	P17897	0	0.000606003	0.000707915	0.000641961	0.000320426	0.000261057	0	0.000233967	-26.5754	-10.6884	-10.4641	-10.6052	-11.6077	-11.9033	-26.5754	-12.0613	0.890116	3	3	6	Inf	Inf	0.957294	0.957294
28S ribosomal protein S6, mitochondrial	Mrps6	P58064	0	0.000551896	0.000343844	0.000389762	0.000583634	0.000475497	0.000581085	0.000426154	-26.5754	-10.8233	-11.5059	-11.3251	-10.7426	-11.0382	-10.7489	-11.1963	0.368529	3	4	7	Inf	Inf	0.54268	0.54268
Triadin	Trdn	E9Q9K5	0	6.60388e-05	0	0	6.98365e-05	0	7.8223e-05	7.64891e-05	-26.5754	-13.8861	-26.5754	-26.5754	-13.8055	-26.5754	-13.6419	-13.6742	0.385259	1	3	4	Inf	Inf	0.54268	0.54268
Aspartate aminotransferase, cytoplasmic	Got1	P05201	0.000236623	0.000335937	0.000470917	0.000415181	0.000532883	0.00038591	0.000486343	0.00043233	-12.0451	-11.5395	-11.0522	-11.2339	-10.8739	-11.3394	-11.0057	-11.1755	0.264608	4	4	8	1.36871	0.452819	0.54268	0.54268
Eukaryotic translation initiation factor 2 subunit 1	Eif2s1	Q6ZWX6	0	0	0.000200576	0	0.000226969	0	0.000225977	0.000220969	-26.5754	-26.5754	-12.2835	-26.5754	-12.1052	-26.5754	-12.1115	-12.1438	0.177935	1	3	4	NA	NA	0.542371	0.542371
ATP synthase subunit alpha, mitochondrial	Atp5f1a	Q03265	0.0134849	0.0107742	0.0106706	0.0105496	0.0133911	0.0121674	0.0128468	0.0119654	-6.21251	-6.53627	-6.55021	-6.56667	-6.22258	-6.36083	-6.28244	-6.38498	0.0785357	4	4	8	1.11513	0.157209	0.439415	0.439415
Cytochrome b-c1 complex subunit 6, mitochondrial	Uqcrh	P99028	0.00108847	0.00103021	0.00120346	0.00136417	0.00136181	0.00199709	0.00183042	0.000994358	-9.84347	-9.92284	-9.69859	-9.51775	-9.52025	-8.96788	-9.0936	-9.97393	0.320192	4	4	8	1.35989	0.443485	0.54268	0.54268
60S ribosomal protein L37a	Rpl37a	P61514	0.000725645	0.000772654	0.00144415	0.000545667	0.000544725	0.000665696	0.000406759	0.000596615	-10.4284	-10.3379	-9.43556	-10.8397	-10.8422	-10.5528	-11.2635	-10.7109	0.26903	4	4	8	0.746819	-0.421169	0.54268	0.54268
Annexin A6	Anxa6	P14824	0	0.00020333	0.000380039	0.000358991	0.000430046	0.000379563	0.000294365	0.000418677	-26.5754	-12.2638	-11.3615	-11.4437	-11.1832	-11.3633	-11.7301	-11.2218	0.365418	3	4	7	Inf	Inf	0.54268	0.54268
Pentatricopeptide repeat domain-containing protein 3, mitochondrial	Ptcd3	Q14C51	0	0	0	0	0.000104755	0	0	5.09927e-05	-26.5754	-26.5754	-26.5754	-26.5754	-13.2206	-26.5754	-26.5754	-14.2591	0.182211	0	2	2	NA	NA	0.542371	0.542371
Basigin	Bsg	P18572	0.000172773	0.000122644	0.000114615	0	0.000129696	0.000105666	0.000242119	0.000284102	-12.4988	-12.9931	-13.0908	-26.5754	-12.9125	-13.2081	-12.0119	-11.7813	0.376078	3	4	7	Inf	Inf	0.54268	0.54268
60S acidic ribosomal protein P0	Rplp0	P14869	0.000320138	0.000378752	0.000212374	0	0.00024032	0.000326321	0.00047854	0.000526425	-11.609	-11.3664	-12.201	-26.5754	-12.0227	-11.5814	-11.029	-10.8915	0.37383	3	4	7	Inf	Inf	0.54268	0.54268
Cytochrome c oxidase subunit 6C	Cox6c	Q9CPQ1	0.00544234	0.00547297	0.00601728	0.00545667	0.00748996	0.00665696	0.00610139	0.00522038	-7.52156	-7.51346	-7.37667	-7.51776	-7.06082	-7.23092	-7.35664	-7.58163	0.242693	4	4	8	1.14081	0.190062	0.54268	0.54268
Adhesion G-protein coupled receptor V1	Adgrv1	Q8VHN7	1.58438e-05	7.49786e-06	0	0	0	0	0	0	-15.9448	-17.0232	-26.5754	-26.5754	-26.5754	-26.5754	-26.5754	-26.5754	0.182597	2	0	2	NA	NA	0.542371	0.542371
Obscurin	Obscn	A2AAJ9	0	0	0	0	1.40829e-05	0	0	6.16975e-06	-26.5754	-26.5754	-26.5754	-26.5754	-16.1147	-26.5754	-26.5754	-17.304	0.182844	0	2	2	NA	NA	0.542371	0.542371
Ferrochelatase, mitochondrial	Fech	P22315	0.000540374	0.000383587	0.000409687	0.000464397	0.000869242	0.000424912	0.00056254	0.000550071	-10.8537	-11.3481	-11.2532	-11.0723	-10.1679	-11.2005	-10.7957	-10.8281	0.0490826	4	4	8	1.31848	0.398871	0.368458	0.368458
Ig heavy chain V region 102	NA	P01750	0	0.00138682	0	0.000839487	0.000838038	0.00119484	0.00125157	0.00107085	-26.5754	-9.494	-26.5754	-10.2182	-10.2207	-9.70896	-9.64204	-9.86702	0.179284	2	4	6	Inf	Inf	0.542371	0.542371
Creatine kinase M-type	Ckm	P07310	0.00109691	0.00113802	0.00106352	0.000951744	0.00133014	0.0012385	0.00113514	0.00101748	-9.83233	-9.77925	-9.87693	-10.0371	-9.55419	-9.65717	-9.7829	-9.94077	0.0437701	4	4	8	1.10934	0.149698	0.368458	0.368458
Endoplasmin	Hsp90b1	P08113	0.000197186	8.39842e-05	0.000156972	8.89674e-05	0.000177628	0.000144716	0.000198958	0.00043233	-12.3081	-13.5394	-12.6371	-13.4562	-12.4588	-12.7544	-12.2952	-11.1755	0.218606	4	4	8	2.18771	1.12942	0.54268	0.54268
Cofilin-1	Cfl1	P18760	0.000954796	0.000677767	0.000886757	0.000287193	0.00100344	0.000583943	0.00117746	0.00146537	-10.0325	-10.5269	-10.1392	-11.7656	-9.96082	-10.7419	-9.73009	-9.41451	0.341268	4	4	8	2.08568	1.06052	0.54268	0.54268
DnaJ homolog subfamily A member 2	Dnaja2	Q9QYJ0	0.000473247	0.000335937	0.000261621	0.00035587	0.000355255	0.000144716	0.000132639	0.000345864	-11.0451	-11.5395	-11.9002	-11.4563	-11.4588	-12.7544	-12.8801	-11.4975	0.08901	4	4	8	0.665084	-0.588392	0.47472	0.47472
E3 ubiquitin-protein ligase NEDD4	Nedd4	P46935	0	7.5015e-05	4.67361e-05	0	7.93288e-05	6.46306e-05	5.92368e-05	3.86159e-05	-26.5754	-13.7023	-14.3848	-26.5754	-13.6216	-13.9172	-14.0429	-14.6601	0.17917	2	4	6	Inf	Inf	0.542371	0.542371
Myosin-binding protein C, cardiac-type	Mybpc3	O70468	0.00131234	0.00131516	0.00148512	0.00135449	0.00160327	0.00132195	0.00144241	0.00152327	-9.57364	-9.57054	-9.3952	-9.52802	-9.28476	-9.56311	-9.43729	-9.3586	0.25721	4	4	8	1.08068	0.111935	0.54268	0.54268
GrpE protein homolog 1, mitochondrial	Grpel1	Q99LP6	0.00151176	0.000858505	0.0017049	0.00170521	0.0014753	0.000739662	0.0010169	0.00107722	-9.36955	-10.1859	-9.19609	-9.19583	-9.40477	-10.4008	-9.94159	-9.85846	0.094927	4	4	8	0.766408	-0.383816	0.491895	0.491895
Caveolin-3	Cav3	P51637	0	0	0.000424749	0	0	0.000522114	0.000358905	0.000467933	-26.5754	-26.5754	-11.2011	-26.5754	-26.5754	-10.9033	-11.4441	-11.0614	0.186717	1	3	4	NA	NA	0.542371	0.542371
NADH dehydrogenase [ubiquinone] 1 alpha subcomplex assembly factor 4	Ndufaf4	Q9D1H6	0	0	0	0	0.000544725	0	0.00020338	0	-26.5754	-26.5754	-26.5754	-26.5754	-10.8422	-26.5754	-12.2635	-26.5754	0.182402	0	2	2	NA	NA	0.542371	0.542371
Transitional endoplasmic reticulum ATPase	Vcp	Q01853	0.0001223	0.000405137	0.000486791	0.000153277	0.000397833	0.000349054	0.000434181	0.000603319	-12.9972	-11.2693	-11.0044	-12.6715	-11.2955	-11.4842	-11.1694	-10.6948	0.255713	4	4	8	2.23564	1.16069	0.54268	0.54268
Lamin-B1	Lmnb1	P14733	0	0	0	0	0.000243907	0	0	8.9047e-05	-26.5754	-26.5754	-26.5754	-26.5754	-12.0013	-26.5754	-26.5754	-13.4549	0.182566	0	2	2	NA	NA	0.542371	0.542371
Protein NDRG2	Ndrg2	Q9QYG0	0	0	0	0.000133089	0.00013286	0.000108243	0.000198419	0	-26.5754	-26.5754	-26.5754	-12.8752	-12.8777	-13.1733	-12.2991	-26.5754	0.388393	1	3	4	Inf	Inf	0.54268	0.54268
Puromycin-sensitive aminopeptidase	Npepps	Q11011	0.000211353	0.00015003	0.000186945	0.000185421	0.000185101	0.000107718	0.00017771	0.000135156	-12.208	-12.7024	-12.385	-12.3968	-12.3993	-13.1803	-12.4581	-12.853	0.0574667	4	4	8	0.81832	-0.289262	0.368458	0.368458
Kinesin-like protein KIF27	Kif27	Q7M6Z4	0.000273828	0.000145784	0.000105965	0.000188753	0.000239816	5.58235e-05	5.11647e-05	0	-11.8344	-12.7438	-13.204	-12.3711	-12.0257	-14.1285	-14.2542	-26.5754	0.297039	4	3	7	0.435389	-1.19962	0.54268	0.54268
Malate dehydrogenase, mitochondrial	Mdh2	P08249	0.00131019	0.00128776	0.00167147	0.00197046	0.00249665	0.0016026	0.00169483	0.00193347	-9.57599	-9.60091	-9.22466	-8.98724	-8.64578	-9.28536	-9.20463	-9.01458	0.254616	4	4	8	1.28632	0.363244	0.54268	0.54268
Gasdermin-A	Gsdma	Q9EST1	0.000580516	0.000257551	0.000240691	0.000109133	0.000326835	0.000133139	0	0	-10.7504	-11.9228	-12.0205	-13.1615	-11.5791	-12.8747	-26.5754	-26.5754	0.144314	4	2	6	0.269987	-1.88904	0.542371	0.542371
Heterogeneous nuclear ribonucleoprotein U	Hnrnpu	Q8VEK3	0.000164919	0.000263405	0.000300864	0.000217027	0.000185702	0.000126079	0.000161779	0.00024859	-12.5659	-11.8904	-11.6986	-12.1698	-12.3946	-12.9533	-12.5936	-11.9739	0.323445	4	4	8	0.821954	-0.282871	0.54268	0.54268
Carbonyl reductase [NADPH] 1	Cbr1	P48758	0.000234079	0.000166162	0.000388211	0.000176022	0.000175718	0	0.000196819	0.000192456	-12.0607	-12.555	-11.3308	-12.4719	-12.4744	-26.5754	-12.3108	-12.3431	0.343734	4	3	7	0.587759	-0.766704	0.54268	0.54268
Mitochondrial carrier homolog 2	Mtch2	Q791V5	0	0	0.00021881	0	0.000247602	0	0.000184891	0.000241057	-26.5754	-26.5754	-12.158	-26.5754	-11.9796	-26.5754	-12.401	-12.0183	0.187063	1	3	4	NA	NA	0.542371	0.542371
Ig kappa chain V19-17	Igk-V19-17	P01633	0.00204088	0.0016097	0.00135389	0.00238729	0.00119159	0.00166424	0.00127112	0.00174013	-8.93659	-9.27899	-9.52867	-8.7104	-9.71289	-9.23091	-9.61967	-9.16658	0.184806	4	4	8	0.821381	-0.283876	0.542371	0.542371
Cytochrome c-type heme lyase	Hccs	P53702	0.000468158	0.000415405	0	0	0	0	0.000131213	0	-11.0607	-11.2332	-26.5754	-26.5754	-26.5754	-26.5754	-12.8957	-26.5754	0.583385	2	1	3	NA	NA	0.708452	0.708452
Acidic leucine-rich nuclear phosphoprotein 32 family member B	Anp32b	Q9EST5	0.00128743	0.000913892	0.00100935	0.000704086	0.00105431	0.000787382	0.000524851	0.000577369	-9.60127	-10.0957	-9.95234	-10.4719	-9.88948	-10.3106	-10.8958	-10.7582	0.0850874	4	4	8	0.755126	-0.40521	0.464669	0.464669
ATP-dependent 6-phosphofructokinase, muscle type	Pfkm	P47857	0.00106713	0.00121201	0.0018689	0.00150861	0.0017303	0.00154024	0.0017706	0.00166116	-9.87204	-9.68837	-9.06359	-9.37256	-9.17475	-9.34262	-9.14154	-9.23358	0.192805	4	4	8	1.2352	0.304746	0.54268	0.54268
Trifunctional enzyme subunit alpha, mitochondrial	Hadha	Q8BMS1	0.00397793	0.00387879	0.00437884	0.00410894	0.00456125	0.00398348	0.00448415	0.00426496	-7.97376	-8.01018	-7.83523	-7.92702	-7.77635	-7.97175	-7.80095	-7.87325	0.129721	4	4	8	1.05891	0.0825841	0.542371	0.542371
CD5 antigen-like	Cd5l	Q9QWK4	0.000279094	0.000792466	0.000493725	0.000909444	0.000558692	0.000284485	0.00036504	0.000407942	-11.8069	-10.3013	-10.984	-10.1027	-10.8056	-11.7793	-11.4196	-11.2593	0.417189	4	4	8	0.887178	-0.172704	0.552216	0.552216
Protein-L-isoaspartate O-methyltransferase domain-containing protein 1	Pcmtd1	P59913	0.00053096	0.000314087	0.000352231	0.000465813	0.000398579	0.00032473	0.000297629	0.000339537	-10.8791	-11.6365	-11.4712	-11.0679	-11.2928	-11.5884	-11.7141	-11.5241	0.102506	4	4	8	0.839614	-0.252202	0.51085	0.51085
Eukaryotic initiation factor 4A-I	Eif4a1	P60843	0.000157749	0	0	0.000177935	0	0.000241194	0.000221065	0.000475563	-12.63	-26.5754	-26.5754	-12.4563	-26.5754	-12.0175	-12.1432	-11.038	0.585825	2	3	5	Inf	Inf	0.710469	0.710469
Mitochondrial import inner membrane translocase subunit TIM50	Timm50	Q9D880	0.000272117	0	0	0.000136417	0.000204272	0.000166424	0.00020338	0.000198872	-11.8434	-26.5754	-26.5754	-12.8396	-12.2572	-12.5528	-12.2635	-12.2958	0.179178	2	4	6	Inf	Inf	0.542371	0.542371
39S ribosomal protein L12, mitochondrial	Mrpl12	Q9DB15	0.000659677	0.000351206	0.00043762	0.00024803	0.000742806	0.000605178	0.000647117	0.000361585	-10.5659	-11.4754	-11.158	-11.9771	-10.3947	-10.6903	-10.5937	-11.4333	0.0270178	4	4	8	1.44642	0.532491	0.337538	0.337538
28S ribosomal protein S9, mitochondrial	Mrps9	Q9D7N3	0	0.000228935	0.000160461	0.000121259	0.000181575	0.000197243	0.000180782	0.000220969	-26.5754	-12.0927	-12.6054	-13.0095	-12.4271	-12.3077	-12.4334	-12.1438	0.360435	3	4	7	Inf	Inf	0.54268	0.54268
Fibrinogen gamma chain	Fgg	Q8VCM7	0.000148091	0.000210246	0	0	0.000333505	0.000135856	0.000124518	0.000162344	-12.7211	-12.2156	-26.5754	-26.5754	-11.55	-12.8455	-12.9712	-12.5886	0.170862	2	4	6	Inf	Inf	0.542371	0.542371
Fumarate hydratase, mitochondrial	Fh	P97807	0.000335947	0.000381558	0.000312007	0.000555772	0.000706125	0.000493108	0.000451955	0.000405109	-11.5394	-11.3558	-11.6461	-10.8132	-10.4678	-10.9858	-11.1115	-11.2694	0.31595	4	4	8	1.39293	0.478118	0.54268	0.54268
Keratin, type II cuticular Hb2	Krt82	Q99M74	0.00133671	0.000587398	0.000464492	0.000670117	0.000764526	0.000583943	0.000107042	0.000279118	-9.54708	-10.7333	-11.072	-10.5433	-10.3531	-10.7419	-13.1894	-11.8068	0.097551	4	4	8	0.553259	-0.853974	0.49702	0.49702
NADH dehydrogenase [ubiquinone] 1 alpha subcomplex subunit 3	Ndufa3	Q9CQ91	0.000806272	0.000572336	0.000534869	0.000606296	0	0.000739662	0.000451955	0.000441937	-10.2764	-10.7708	-10.8685	-10.6877	-26.5754	-10.4008	-11.1115	-11.1438	0.38033	4	3	7	0.716562	-0.480836	0.54268	0.54268
S-phase kinase-associated protein 1	Skp1	Q9WTX5	0.00114576	0.00121998	0.00164683	0.000574386	0.000860092	0.00093431	0.000856336	0.000732685	-9.76947	-9.67891	-9.24608	-10.7657	-10.1832	-10.0638	-10.1895	-10.4145	0.282302	4	4	8	0.828026	-0.272253	0.54268	0.54268
Catalase	Cat	P24270	0.000120941	0.000300477	0.000441267	0.00040925	0.000680906	0.000258882	0.000440656	0.000497179	-13.0133	-11.7004	-11.146	-11.2547	-10.5202	-11.9154	-11.148	-10.9739	0.382513	4	4	8	2.17628	1.12186	0.54268	0.54268
Histone H2A type 2-C	H2ac20	Q64523	0.00259159	0.00128776	0.000859611	0.000779524	0.000389089	0.000792495	0.000290542	0.00142051	-8.59194	-9.60091	-10.184	-10.3251	-11.3276	-10.3013	-11.7489	-9.45936	0.266013	4	4	8	0.731454	-0.45116	0.54268	0.54268
Heat shock protein beta-1	Hspb1	P14602	0.00205074	0.000783852	0.000418593	0.000830362	0.00071051	0.00038591	0.000618982	0.00043233	-8.92964	-10.3171	-11.2221	-10.234	-10.4588	-11.3394	-10.6578	-11.1755	0.203183	4	4	8	0.709541	-0.495043	0.54268	0.54268
39S ribosomal protein L11, mitochondrial	Mrpl11	Q9CQF0	0.000345545	0.000490574	0.00022923	0.000259841	0.000648482	0.00052833	0.000581085	0.000189402	-11.4988	-10.9932	-12.0909	-11.91	-10.5906	-10.8862	-10.7489	-12.3662	0.322566	4	4	8	1.55438	0.636338	0.54268	0.54268
Malate dehydrogenase, cytoplasmic	Mdh1	P14152	0.000588361	0.000765693	0.00078062	0.00103234	0.000809726	0.000539753	0.000604642	0.000644989	-10.731	-10.3509	-10.3231	-9.91985	-10.2703	-10.8554	-10.6916	-10.5984	0.359339	4	4	8	0.870128	-0.200701	0.54268	0.54268
Ig kappa chain V-V region MOPC 41	Gm5571	P01639	0.000518318	0.000735861	0.000515767	0.00116929	0	0.000633996	0.000435814	0.000710256	-10.9138	-10.4083	-10.921	-9.74014	-26.5754	-10.6232	-11.164	-10.4594	0.350831	4	3	7	0.578495	-0.789624	0.54268	0.54268
60S ribosomal protein L17	Rpl17	Q9CPR4	0	0.000490574	0.000458459	0	0	0	0	0.000189402	-26.5754	-10.9932	-11.0909	-26.5754	-26.5754	-26.5754	-26.5754	-12.3662	0.597013	2	1	3	NA	NA	0.72116	0.72116
F-box/WD repeat-containing protein 5	Fbxw5	Q9QXW2	0.000334913	0.00110945	0.000814647	0.000923436	0.00067043	0.000512074	0.000594494	0.000520126	-11.5439	-9.81592	-10.2615	-10.0807	-10.5426	-10.9313	-10.716	-10.9088	0.511433	4	4	8	0.939092	-0.0906618	0.636462	0.636462
Apoptosis-inducing factor 1, mitochondrial	Aifm1	Q9Z0X1	0.000324916	0.000615048	0.000790329	0.000651542	0.000772371	0.00079486	0.000667814	0.000682694	-11.5876	-10.667	-10.3052	-10.5838	-10.3384	-10.297	-10.5482	-10.5165	0.343317	4	4	8	1.39057	0.475679	0.54268	0.54268
Elongation factor 1-alpha 2	Eef1a2	P62631	0.00420874	0.00314213	0.00284015	0.00305573	0.00332282	0.00266278	0.00280664	0.00266488	-7.89239	-8.31404	-8.45981	-8.35426	-8.23337	-8.55284	-8.47694	-8.55171	0.0606029	4	4	8	0.87431	-0.193782	0.36867	0.36867
Ig lambda-1 chain C region	NA	P01843	0.00181411	0.00171701	0.00320921	0.00363778	0.00113484	0.00110949	0.00271173	0.00215444	-9.10651	-9.18588	-8.28356	-8.10272	-9.78328	-9.81587	-8.52657	-8.85846	0.0149702	4	4	8	0.677241	-0.562258	0.216554	0.216554
NADH dehydrogenase [ubiquinone] 1 beta subcomplex subunit 5, mitochondrial	Ndufb5	Q9CQH3	0.000659677	0.000351206	0.00043762	0	0.000495204	0.000605178	0.000647117	0.000451981	-10.5659	-11.4754	-11.158	-26.5754	-10.9797	-10.6903	-10.5937	-11.1114	0.35931	3	4	7	Inf	Inf	0.54268	0.54268
NADH dehydrogenase [ubiquinone] flavoprotein 1, mitochondrial	Ndufv1	Q91YT0	0.00142283	0.000757504	0.00113266	0.00139092	0.00133511	0.00160985	0.00135586	0.00128682	-9.45701	-10.3664	-9.78605	-9.48974	-9.54882	-9.27885	-9.52656	-9.60197	0.383408	4	4	8	1.29644	0.374558	0.54268	0.54268
EH domain-containing protein 1	Ehd1	Q9WVK4	0	0	0	0.00013418	0.000133949	0.00010913	0	0.000130408	-26.5754	-26.5754	-26.5754	-12.8634	-12.8659	-13.1615	-26.5754	-12.9046	0.182696	1	3	4	NA	NA	0.542371	0.542371
Myosin-4	Myh4	Q5SX39	0.000748423	0.000646766	0.000518079	0.000293632	0.000916017	0	0	0	-10.3838	-10.5944	-10.9145	-11.7337	-10.0923	-26.5754	-26.5754	-26.5754	0.0614591	4	1	5	0.305982	-1.70848	0.37118	0.37118
40S ribosomal protein S9	Rps9	Q6ZWN5	0	0.000447915	0.000941835	0.00035587	0.000592092	0.000482388	0.00114954	0.000778194	-26.5754	-11.1245	-10.0522	-11.4563	-10.7219	-11.0175	-9.76472	-10.3276	0.340498	3	4	7	Inf	Inf	0.54268	0.54268
Nebulette	Nebl	Q0II04	0	9.90582e-05	0	0.000157404	0.000314264	0	0.000117334	0.000229467	-26.5754	-13.3012	-26.5754	-12.6331	-11.6357	-26.5754	-13.057	-12.0894	0.592585	2	3	5	Inf	Inf	0.717274	0.717274
60S ribosomal protein L34	Rpl34	Q9D1R9	0.00139547	0.0011887	0.000925735	0.000629615	0.000628528	0.000853456	0.00109512	0.000458935	-9.48502	-9.71639	-10.0771	-10.6332	-10.6357	-10.1944	-9.83468	-11.0894	0.203792	4	4	8	0.770067	-0.376944	0.54268	0.54268
Ig kappa chain V-V region MOPC 149	NA	P01636	0	0.000429252	0	0	0	0.000554746	0.000338966	0.000331453	-26.5754	-11.1859	-26.5754	-26.5754	-26.5754	-10.8159	-11.5265	-11.5589	0.174001	1	3	4	NA	NA	0.542371	0.542371
Dihydropyrimidinase-related protein 2	Dpysl2	O08553	0.000234079	8.30811e-05	7.76423e-05	0	0	0	6.56063e-05	6.41522e-05	-12.0607	-13.5549	-13.6526	-26.5754	-26.5754	-26.5754	-13.8956	-13.9279	0.59301	3	2	5	Inf	Inf	0.717274	0.717274
Sodium/potassium-transporting ATPase subunit alpha-2	Atp1a2	Q6PIE5	0	0	0.000322354	0	0	0.000277373	0.000290542	0.000301859	-26.5754	-26.5754	-11.599	-26.5754	-26.5754	-11.8158	-11.7489	-11.6938	0.184939	1	3	4	NA	NA	0.542371	0.542371
MICOS complex subunit Mic19	Chchd3	Q9CRB9	0.00195366	0.00128776	0.00148118	0.0014691	0.00188559	0.000938801	0.00109512	0.000917869	-8.9996	-9.60091	-9.39903	-9.41084	-9.05076	-10.0569	-9.83468	-10.0894	0.0527975	4	4	8	0.764579	-0.387262	0.368458	0.368458
Glutaryl-CoA dehydrogenase, mitochondrial	Gcdh	Q60759	0.000148091	0	0.000147362	0.000111361	0.000166752	0.000135856	0.000166024	0.000121758	-12.7211	-26.5754	-12.7283	-13.1323	-12.5499	-12.8455	-12.5562	-13.0036	0.372272	3	4	7	Inf	Inf	0.54268	0.54268
MAP/microtubule affinity-regulating kinase 3	Mark3	Q03141	0	0.000153304	5.73074e-05	6.49603e-05	0	5.2833e-05	4.84237e-05	0	-26.5754	-12.6712	-14.0907	-13.9099	-26.5754	-14.2079	-14.3336	-26.5754	0.319923	3	2	5	NA	NA	0.54268	0.54268
5-oxoprolinase	Oplah	Q8K010	0	7.46526e-05	0.000104648	0.000118623	7.89456e-05	0.000128637	0.000117901	0.000115288	-26.5754	-13.7093	-13.222	-13.0412	-13.6286	-12.9243	-13.05	-13.0823	0.353586	3	4	7	Inf	Inf	0.54268	0.54268
Annexin A1	Anxa1	P10107	0.000465157	0.000858505	0	0.000139915	0.000279346	0.000170691	0	0	-11.07	-10.1859	-26.5754	-12.8031	-11.8056	-12.5162	-26.5754	-26.5754	0.282815	3	2	5	NA	NA	0.54268	0.54268
Acidic leucine-rich nuclear phosphoprotein 32 family member A	Anp32a	O35381	0.00162645	0.000710487	0.000497982	0.000564483	0.000939181	0.000535617	0.000280524	0	-9.26405	-10.4589	-10.9716	-10.7908	-10.0563	-10.8665	-11.7995	-26.5754	0.323536	4	3	7	0.47366	-1.07808	0.54268	0.54268
Glutathione peroxidase 3	Gpx3	P46412	0.00116103	0.000721144	0.000577659	0.000436533	0.00065367	0.000532556	0.000488111	0.000397743	-9.75036	-10.4374	-10.7575	-11.1616	-10.5791	-10.8748	-11.0005	-11.2958	0.0744508	4	4	8	0.764405	-0.387591	0.421734	0.421734
Succinate dehydrogenase [ubiquinone] iron-sulfur subunit, mitochondrial	Sdhb	Q9CQA3	0.00362823	0.00321939	0.00315907	0.00358094	0.00400032	0.00360585	0.00374981	0.00323166	-8.10652	-8.27899	-8.30628	-8.12544	-7.96566	-8.11544	-8.05896	-8.2735	0.325736	4	4	8	1.07801	0.108377	0.54268	0.54268
Dihydrolipoyllysine-residue acetyltransferase component of pyruvate dehydrogenase complex, mitochondrial	Dlat	Q8BMF4	0.00128055	0.000984755	0.00134504	0.00132404	0.00164218	0.00140318	0.00146553	0.00111134	-9.60901	-9.98793	-9.53813	-9.56082	-9.25016	-9.47707	-9.41435	-9.81347	0.346494	4	4	8	1.15906	0.212957	0.54268	0.54268
Cytochrome c, somatic	Cycs	P62897	0.000604704	0.00193164	0.00240691	0.00113681	0.00204272	0.00332848	0.00254225	0.00116008	-10.6915	-9.01595	-8.6986	-9.78079	-8.93529	-8.23092	-8.61967	-9.75154	0.199144	4	4	8	1.79447	0.84356	0.54268	0.54268
Short/branched chain specific acyl-CoA dehydrogenase, mitochondrial	Acadsb	Q9DBL1	0.00037794	0.000268283	0.000150432	0.000227361	0.000283711	0.000323602	0.000296595	0.000372884	-11.3695	-11.8639	-12.6985	-12.1027	-11.7832	-11.5934	-11.7192	-11.3889	0.292843	4	4	8	1.39214	0.477302	0.54268	0.54268
Cytochrome c oxidase subunit NDUFA4	Ndufa4	Q62425	0.00806272	0.00515103	0.00561613	0.00485037	0.007263	0.00788973	0.0070053	0.00574518	-6.95452	-7.60092	-7.47621	-7.68769	-7.10522	-6.98581	-7.15734	-7.44343	0.201826	4	4	8	1.21608	0.282241	0.54268	0.54268
Ig kappa chain V-III region PC 2880/PC 1229	NA	P01654	0.000907056	0.000858505	0.00160461	0.000682083	0	0	0.00152535	0.000497179	-10.1065	-10.1859	-9.28356	-10.5177	-26.5754	-26.5754	-9.35664	-10.9739	0.171647	4	2	6	0.419879	-1.25195	0.542371	0.542371
Elongation factor 1-alpha 1	Eef1a1	P10126	0.00108847	0.000824164	0	0.000436533	0.000272362	0	0	0.000676164	-9.84347	-10.2448	-26.5754	-11.1616	-11.8421	-26.5754	-26.5754	-10.5303	0.350233	3	2	5	NA	NA	0.54268	0.54268
Bifunctional epoxide hydrolase 2	Ephx2	P34914	0.000230364	0.000245287	0.000267435	0.000173228	0.000259393	0.00017611	0.000193695	9.47008e-05	-12.0837	-11.9932	-11.8685	-12.495	-11.9125	-12.4712	-12.3339	-13.3661	0.152897	4	4	8	0.778736	-0.360793	0.542371	0.542371
Cysteine desulfurase, mitochondrial	Nfs1	Q9Z1J3	0	0	0.000283166	0.000427974	0.000373831	0.000304567	0.000199392	0.000389944	-26.5754	-26.5754	-11.786	-11.1902	-11.3853	-11.6809	-12.292	-11.3244	0.195604	2	4	6	Inf	Inf	0.54268	0.54268
40S ribosomal protein S27	Rps27	Q6ZWU9	0	0	0	0.000606296	0	0.000493108	0.000677932	0.000441937	-26.5754	-26.5754	-26.5754	-10.6877	-26.5754	-10.9858	-10.5265	-11.1438	0.191134	1	3	4	NA	NA	0.54268	0.54268
Leucine-rich PPR motif-containing protein, mitochondrial	Lrpprc	Q6PB66	0.000300426	0.00054135	0.000398597	0.000538716	0.00050309	0.000480545	0.00059589	0.000506679	-11.7007	-10.8511	-11.2927	-10.8582	-10.9569	-11.023	-10.7126	-10.9466	0.334401	4	4	8	1.24944	0.321283	0.54268	0.54268
Methylmalonic aciduria type A homolog, mitochondrial	Mmaa	Q8C7H1	0.000236623	0.000279947	0.000156972	0.000118623	0.000414464	0.000241194	0.000265278	0.000172932	-12.0451	-11.8025	-12.6371	-13.0412	-11.2364	-12.0175	-11.8802	-12.4974	0.139058	4	4	8	1.44023	0.526304	0.542371	0.542371
Decorin	Dcn	P28654	0.000181411	0.000450715	0.000300864	0.000204625	0.000544725	0.000332848	0.000355914	0.000298308	-12.4284	-11.1155	-11.6986	-12.2547	-10.8422	-11.5528	-11.4561	-11.7109	0.333706	4	4	8	1.5955	0.674007	0.54268	0.54268
39S ribosomal protein L41, mitochondrial	Mrpl41	Q9CQN7	0.000483763	0	0	0	0	0.000443797	0.000406759	0.000397743	-11.0134	-26.5754	-26.5754	-26.5754	-26.5754	-11.1378	-11.2635	-11.2958	0.396908	1	3	4	Inf	Inf	0.54268	0.54268
Glutamate dehydrogenase 1, mitochondrial	Glud1	P26443	0	0	0.000118373	8.94536e-05	0.000133949	7.27536e-05	0.000100023	6.52038e-05	-26.5754	-26.5754	-13.0443	-13.4483	-12.8659	-13.7464	-13.2872	-13.9045	0.199268	2	4	6	Inf	Inf	0.54268	0.54268
CDGSH iron-sulfur domain-containing protein 3, mitochondrial	Cisd3	B1AR13	0.000907056	0.00177067	0.00195562	0.00170521	0.00136181	0.00138687	0.00139824	0.000994358	-10.1065	-9.14148	-8.99815	-9.19583	-9.52025	-9.49395	-9.48217	-9.97393	0.447436	4	4	8	0.895678	-0.158947	0.578811	0.578811
Coiled-coil-helix-coiled-coil-helix domain-containing protein 1	Chchd1	Q9CQA6	0.00129579	0.000367931	0.000687689	0.000779524	0.000583634	0.000475497	0.000581085	0.000568205	-9.59194	-11.4082	-10.5059	-10.3251	-10.7426	-11.0382	-10.7489	-10.7813	0.323216	4	4	8	0.829164	-0.270271	0.54268	0.54268
ATP synthase subunit f, mitochondrial	Atp5mf	P56135	0.00145129	0.00154531	0.00168484	0.00109133	0.00108945	0.00177519	0.0010169	0.000596615	-9.42844	-9.33788	-9.21317	-9.83968	-9.84217	-9.1378	-9.94159	-10.7109	0.152725	4	4	8	0.76242	-0.391342	0.542371	0.542371
Dysferlin	Dysf	Q9ESD7	0	0	2.02261e-05	0	0	0	5.12722e-05	3.34238e-05	-26.5754	-26.5754	-15.5927	-26.5754	-26.5754	-26.5754	-14.2512	-14.8683	0.332931	1	2	3	NA	NA	0.54268	0.54268
60S ribosomal protein L30	Rpl30	P62889	0.00251185	0.00178305	0.0027772	0.00167897	0.00272362	0.00256037	0.00250313	0.00229467	-8.63703	-9.13143	-8.49215	-9.2182	-8.52025	-8.60943	-8.64204	-8.76749	0.228586	4	4	8	1.19707	0.259509	0.54268	0.54268
Caveolae-associated protein 2	Cavin2	Q63918	0	0.000383587	0.000409687	0.000232199	0.000289747	0.0003777	0.000432723	0.000380818	-26.5754	-11.3481	-11.2532	-12.0723	-11.7529	-11.3704	-11.1742	-11.3586	0.363272	3	4	7	Inf	Inf	0.54268	0.54268
Enoyl-CoA delta isomerase 1, mitochondrial	Eci1	P42125	0.00226764	0.00233406	0.00172997	0.00221677	0.00204272	0.0015949	0.00209735	0.00198872	-8.78459	-8.74294	-9.17503	-8.81732	-8.93529	-9.29231	-8.89721	-8.97394	0.454612	4	4	8	0.923404	-0.114967	0.583423	0.583423
Actin, cytoplasmic 1	Actb	P60710	0.0129579	0.00907562	0.00332383	0.00669091	0.00797633	0.00533613	0.00208222	0.00577675	-6.27002	-6.78379	-8.23293	-7.22358	-6.97006	-7.54999	-8.90765	-7.43552	0.0189174	4	4	8	0.673336	-0.570602	0.257503	0.257503
Peroxiredoxin-5, mitochondrial	Prdx5	P99029	0.00181411	0.00163896	0.00131286	0.000992121	0.00123801	0.00110949	0.00129423	0.00126555	-9.10651	-9.25299	-9.57306	-9.97718	-9.65775	-9.81587	-9.59367	-9.62601	0.442386	4	4	8	0.905198	-0.143695	0.574723	0.574723
40S ribosomal protein S3	Rps3	P62908	0.00161254	0.00124006	0.000713159	0.00151574	0.00141225	0.000821846	0.000753258	0.00095753	-9.27644	-9.65536	-10.4535	-9.36575	-9.46778	-10.2488	-10.3745	-10.0284	0.144955	4	4	8	0.806622	-0.310036	0.542371	0.542371
Calpain-2 catalytic subunit	Capn2	O08529	0.000136058	0	0	0	0	0.000138687	0.00010169	9.94358e-05	-12.8434	-26.5754	-26.5754	-26.5754	-26.5754	-12.8158	-13.2634	-13.2957	0.399712	1	3	4	Inf	Inf	0.54268	0.54268
SRA stem-loop-interacting RNA-binding protein, mitochondrial	Slirp	Q9D8T7	0.00362823	0.00277363	0.0027772	0.00209872	0.00272362	0.00256037	0.00219024	0.00229467	-8.10652	-8.494	-8.49215	-8.89627	-8.52025	-8.60943	-8.83469	-8.76749	0.227097	4	4	8	0.888952	-0.169823	0.54268	0.54268
Complement C3	C3	P01027	9.75329e-05	0.000193856	0.000375271	0.000264032	0.000219647	4.77201e-05	0.000131213	0.000213841	-13.3236	-12.3327	-11.3797	-11.8869	-12.1525	-14.3547	-12.8957	-12.1911	0.416957	4	4	8	0.914436	-0.129046	0.552216	0.552216
Myosin regulatory light chain 12B	Myl12b	Q3THE2	0.00145129	0.00103021	0.000601728	0.00136417	0.00108945	0.000887594	0.000610139	0.000894923	-9.42844	-9.92284	-10.6986	-9.51775	-9.84217	-10.1378	-10.6786	-10.1259	0.108958	4	4	8	0.820562	-0.285316	0.527181	0.527181
L-lactate dehydrogenase B chain	Ldhb	P16125	0.00117672	0.000765693	0.00130103	0.00103234	0.00139862	0.00101953	0.00115432	0.00134373	-9.731	-10.3509	-9.58612	-9.91985	-9.48177	-9.93786	-9.75873	-9.53953	0.204963	4	4	8	1.17724	0.235405	0.54268	0.54268
N-acetylneuraminate 9-O-acetyltransferase	Casd1	Q7TN73	0	8.39842e-05	7.84862e-05	5.93116e-05	0	0	6.63195e-05	4.3233e-05	-26.5754	-13.5394	-13.637	-14.0411	-26.5754	-26.5754	-13.88	-14.4972	0.362155	3	2	5	NA	NA	0.54268	0.54268
NADH dehydrogenase [ubiquinone] flavoprotein 3, mitochondrial	Ndufv3	Q8BK30	0	0	0.00120346	0.000682083	0.000907874	0.000554746	0.00118638	0.000662906	-26.5754	-26.5754	-9.69859	-10.5177	-10.1052	-10.8159	-9.7192	-10.5589	0.183067	2	4	6	Inf	Inf	0.542371	0.542371
Perilipin-4	Plin4	O88492	0	0	5.19477e-05	3.92566e-05	0	6.38557e-05	5.85265e-05	5.72293e-05	-26.5754	-26.5754	-14.2323	-14.6363	-26.5754	-13.9346	-14.0603	-14.0926	0.360669	2	3	5	NA	NA	0.54268	0.54268
Ig kappa chain V-V region HP R16.7	NA	P01644	0.00272117	0.00472178	0.00361037	0.00477458	0.00272362	0.00406814	0.0030507	0.00348025	-8.52155	-7.72645	-8.11364	-7.71041	-8.52025	-7.94141	-8.35664	-8.16659	0.0925651	4	4	8	0.859092	-0.219116	0.485169	0.485169
60S ribosomal protein L10a	Rpl10a	P53026	0.000290258	0.000309062	0.000481382	0.000218267	0.000326835	0	0.000244056	0.000318195	-11.7503	-11.6598	-11.0205	-12.1616	-11.5791	-26.5754	-12.0004	-11.6178	0.382844	4	3	7	0.772707	-0.372006	0.54268	0.54268
Glutaredoxin-3	Glrx3	Q9CQM9	0.000286439	0.000338883	0.000316699	0.000430789	0.000358372	0.000291972	0.000321126	0.000209339	-11.7694	-11.5269	-11.6246	-11.1807	-11.4462	-11.7418	-11.6045	-12.2218	0.492179	4	4	8	0.903154	-0.146955	0.61573	0.61573
Ig gamma-2A chain C region secreted form	NA	P01864	0.0029418	0.00549907	0.00429341	0.00398189	0.00287085	0.00425805	0.00373779	0.00322495	-8.40908	-7.50659	-7.86366	-7.97233	-8.4443	-7.87559	-8.0636	-8.2765	0.0525314	4	4	8	0.857673	-0.2215	0.368458	0.368458
Sulfide:quinone oxidoreductase, mitochondrial	Sqor	Q9R112	0	0	9.62764e-05	0.000109133	0	8.87594e-05	0.000284732	0.000119323	-26.5754	-26.5754	-13.3423	-13.1615	-26.5754	-13.4596	-11.7781	-13.0327	0.325668	2	3	5	NA	NA	0.54268	0.54268
Heterogeneous nuclear ribonucleoprotein M	Hnrnpm	Q9D0E1	0	0.000198116	0.000185147	0.000174893	0.000384101	0.000113794	0.000156446	0.000229467	-26.5754	-12.3013	-12.399	-12.4812	-11.3462	-13.1012	-12.642	-12.0894	0.415718	3	4	7	Inf	Inf	0.552216	0.552216
Tyrosine-protein phosphatase non-receptor type 11	Ptpn11	P35235	0	0	7.07915e-05	8.02451e-05	0.00012016	0.000130529	5.98176e-05	0	-26.5754	-26.5754	-13.7859	-13.605	-13.0226	-12.9032	-14.0288	-26.5754	0.621663	2	3	5	Inf	Inf	0.740385	0.740385
60S ribosomal protein L3	Rpl3	P27659	0	0.000111979	0.000366269	0.00035587	0.000236837	0.000192955	0.000353704	0.000605262	-26.5754	-13.1244	-11.4148	-11.4563	-12.0438	-12.3394	-11.4651	-10.6901	0.336754	3	4	7	Inf	Inf	0.54268	0.54268
60S ribosomal protein L23a	Rpl23a	P62751	0.00141098	0.00114467	0.000936021	0.00075787	0.00105919	0.00123277	0.00112989	0.00165726	-9.46908	-9.77084	-10.0612	-10.3657	-9.88281	-9.66387	-9.78959	-9.23697	0.456156	4	4	8	1.30537	0.384463	0.584289	0.584289
UPF0598 protein C8orf82 homolog	NA	Q8VE95	0.000302352	0	0.000300864	0.000341042	0.000340453	0.000277373	0.000338966	0.000331453	-11.6914	-26.5754	-11.6986	-11.5177	-11.5202	-11.8158	-11.5265	-11.5589	0.379834	3	4	7	Inf	Inf	0.54268	0.54268
60S ribosomal protein L19	Rpl19	P84099	0	0.000223958	0.000209297	0.000237246	0	0	0.000176852	0.000172932	-26.5754	-12.1244	-12.2221	-12.0413	-26.5754	-26.5754	-12.4651	-12.4974	0.364911	3	2	5	NA	NA	0.54268	0.54268
Clustered mitochondria protein homolog	Cluh	Q5SW19	0	0	4.87887e-05	3.68694e-05	0	5.99726e-05	4.12256e-05	6.71864e-05	-26.5754	-26.5754	-14.3228	-14.7268	-26.5754	-14.0251	-14.5657	-13.8613	0.365337	2	3	5	NA	NA	0.54268	0.54268
Mitochondrial fission 1 protein	Fis1	Q9CQ92	0	0	0.000424749	0.00032098	0.000320426	0.000783171	0	0.000467933	-26.5754	-26.5754	-11.2011	-11.6052	-11.6077	-10.3184	-26.5754	-11.0614	0.618454	2	3	5	Inf	Inf	0.739689	0.739689
60S ribosomal protein L5	Rpl5	P47962	0.00042685	0.000833255	0.000637123	0.000481471	0.000400533	0.000261057	0.000358905	0.000760392	-11.1939	-10.2289	-10.6161	-11.0202	-11.2858	-11.9033	-11.4441	-10.361	0.404432	4	4	8	0.848569	-0.236896	0.546433	0.546433
Tropomyosin alpha-1 chain	Tpm1	P58771	0.00516747	0.00382425	0.0013858	0.00272833	0.0033839	0.00188278	0.00110934	0.00277215	-7.59632	-8.0306	-9.49506	-8.51776	-8.20709	-9.05292	-9.81606	-8.49477	0.117538	4	4	8	0.740935	-0.432581	0.542371	0.542371
Proteasome subunit alpha type-1	Psma1	Q9R1P4	0	0.000171701	0	0	0.000272362	0	0	0.000265162	-26.5754	-12.5077	-26.5754	-26.5754	-11.8421	-26.5754	-26.5754	-11.8808	0.616843	1	2	3	NA	NA	0.739239	0.739239
Glutathione S-transferase kappa 1	Gstk1	Q9DCM2	0	0	0	0.000209872	0	0.000256037	0	0.000458935	-26.5754	-26.5754	-26.5754	-12.2181	-26.5754	-11.9313	-26.5754	-11.0894	0.350781	1	2	3	NA	NA	0.54268	0.54268
Delta(3,5)-Delta(2,4)-dienoyl-CoA isomerase, mitochondrial	Ech1	O35459	0	0.000500794	0.00046801	0.000454722	0.000529593	0.000431469	0.000508449	0.000441937	-26.5754	-10.9635	-11.0611	-11.1027	-10.8828	-11.1784	-10.9416	-11.1438	0.395875	3	4	7	Inf	Inf	0.54268	0.54268
Keratin, type II cytoskeletal 74	Krt74	Q6IFZ9	0	0	0.000481382	0	0	0	0	0	-26.5754	-26.5754	-11.0205	-26.5754	-26.5754	-26.5754	-26.5754	-26.5754	0.391002	1	0	1	NA	NA	0.54268	0.54268
Tubulin beta-2A chain	Tubb2a	Q7TMM9	0.000725645	0	0	0	0	0	0	0	-10.4284	-26.5754	-26.5754	-26.5754	-26.5754	-26.5754	-26.5754	-26.5754	0.391002	1	0	1	NA	NA	0.54268	0.54268
Serine/arginine repetitive matrix protein 2	Srrm2	Q8BTI8	0	0	4.07951e-05	0	0	0	0	0	-26.5754	-26.5754	-14.5809	-26.5754	-26.5754	-26.5754	-26.5754	-26.5754	0.391002	1	0	1	NA	NA	0.54268	0.54268
Ig kappa chain V-V region MOPC 173	NA	P01643	0	0.00214626	0	0	0	0	0	0	-26.5754	-8.86395	-26.5754	-26.5754	-26.5754	-26.5754	-26.5754	-26.5754	0.391002	1	0	1	NA	NA	0.54268	0.54268
Histone H2B type 3-B	H2bu1	Q8CGP0	0	0	0	0	0	0	0	0.00142051	-26.5754	-26.5754	-26.5754	-26.5754	-26.5754	-26.5754	-26.5754	-9.45936	0.391002	0	1	1	NA	NA	0.54268	0.54268
Filamin-B	Flnb	Q80X90	2.61023e-05	0	0	0	0	0	0	0	-15.2249	-26.5754	-26.5754	-26.5754	-26.5754	-26.5754	-26.5754	-26.5754	0.391002	1	0	1	NA	NA	0.54268	0.54268
Ig heavy chain V region 3	Ighv1-61	P01749	0	0.000594349	0	0	0	0	0	0	-26.5754	-10.7164	-26.5754	-26.5754	-26.5754	-26.5754	-26.5754	-26.5754	0.391002	1	0	1	NA	NA	0.54268	0.54268
HIV Tat-specific factor 1 homolog	Htatsf1	Q8BGC0	0	0	0	6.34496e-05	0	0	0	0	-26.5754	-26.5754	-26.5754	-13.9438	-26.5754	-26.5754	-26.5754	-26.5754	0.391002	1	0	1	NA	NA	0.54268	0.54268
Laminin subunit beta-1	Lamb1	P02469	0	0	0	0	5.5302e-05	0	0	0	-26.5754	-26.5754	-26.5754	-26.5754	-14.142	-26.5754	-26.5754	-26.5754	0.391002	0	1	1	NA	NA	0.54268	0.54268
Protein phosphatase 1 regulatory subunit 12B	Ppp1r12b	Q8BG95	0	0	0	0	0	0	0	3.64902e-05	-26.5754	-26.5754	-26.5754	-26.5754	-26.5754	-26.5754	-26.5754	-14.7417	0.391002	0	1	1	NA	NA	0.54268	0.54268
Epiplakin	Eppk1	Q8R0W0	3.50311e-05	0	0	0	0	0	0	0	-14.8006	-26.5754	-26.5754	-26.5754	-26.5754	-26.5754	-26.5754	-26.5754	0.391002	1	0	1	NA	NA	0.54268	0.54268
Plectin	Plec	Q9QXS1	5.43554e-05	0	0	0	0	0	0	0	-14.167	-26.5754	-26.5754	-26.5754	-26.5754	-26.5754	-26.5754	-26.5754	0.391002	1	0	1	NA	NA	0.54268	0.54268
Heterogeneous nuclear ribonucleoprotein A1	Hnrnpa1	P49312	0	0	0	0	0	0	0	0.000935867	-26.5754	-26.5754	-26.5754	-26.5754	-26.5754	-26.5754	-26.5754	-10.0614	0.391002	0	1	1	NA	NA	0.54268	0.54268
Hexokinase HKDC1	Hkdc1	Q91W97	0	0	0	0	0	0	7.97567e-05	0	-26.5754	-26.5754	-26.5754	-26.5754	-26.5754	-26.5754	-13.6139	-26.5754	0.391002	0	1	1	NA	NA	0.54268	0.54268
Ryanodine receptor 1	Ryr1	E9PZQ0	0	9.11686e-06	0	0	0	0	0	0	-26.5754	-16.7414	-26.5754	-26.5754	-26.5754	-26.5754	-26.5754	-26.5754	0.391002	1	0	1	NA	NA	0.54268	0.54268
Cytochrome c oxidase subunit 6A2, mitochondrial	Cox6a2	P43023	0	0	0	0.000496061	0	0	0	0	-26.5754	-26.5754	-26.5754	-10.9772	-26.5754	-26.5754	-26.5754	-26.5754	0.391002	1	0	1	NA	NA	0.54268	0.54268
ATP synthase subunit a	Mtatp6	P00848	0	0	0	0	0	0.000355038	0	0	-26.5754	-26.5754	-26.5754	-26.5754	-26.5754	-11.4597	-26.5754	-26.5754	0.391002	0	1	1	NA	NA	0.54268	0.54268
Protein transport protein Sec31B	Sec31b	Q3TZ89	8.63863e-05	0	0	0	0	0	0	0	-13.4987	-26.5754	-26.5754	-26.5754	-26.5754	-26.5754	-26.5754	-26.5754	0.391002	1	0	1	NA	NA	0.54268	0.54268
[Pyruvate dehydrogenase (acetyl-transferring)] kinase isozyme 1, mitochondrial	Pdk1	Q8BFP9	0	0	0	0	0	0	0	0.000121758	-26.5754	-26.5754	-26.5754	-26.5754	-26.5754	-26.5754	-26.5754	-13.0036	0.391002	0	1	1	NA	NA	0.54268	0.54268
Fructose-bisphosphate aldolase C	Aldoc	P05063	0	0	0	0	0	0	0	0.000203971	-26.5754	-26.5754	-26.5754	-26.5754	-26.5754	-26.5754	-26.5754	-12.2593	0.391002	0	1	1	NA	NA	0.54268	0.54268
Moesin	Msn	P26041	0	0	0	0	0	0	0	0.00035095	-26.5754	-26.5754	-26.5754	-26.5754	-26.5754	-26.5754	-26.5754	-11.4764	0.391002	0	1	1	NA	NA	0.54268	0.54268
Envoplakin	Evpl	Q9D952	4.69167e-05	0	0	0	0	0	0	0	-14.3792	-26.5754	-26.5754	-26.5754	-26.5754	-26.5754	-26.5754	-26.5754	0.391002	1	0	1	NA	NA	0.54268	0.54268
Polyadenylate-binding protein 1	Pabpc1	P29341	0	0	0	7.68545e-05	0	0	0	0	-26.5754	-26.5754	-26.5754	-13.6673	-26.5754	-26.5754	-26.5754	-26.5754	0.391002	1	0	1	NA	NA	0.54268	0.54268
Obg-like ATPase 1	Ola1	Q9CZ30	0	0	0	0	0	0	9.0391e-05	0	-26.5754	-26.5754	-26.5754	-26.5754	-26.5754	-26.5754	-13.4333	-26.5754	0.391002	0	1	1	NA	NA	0.54268	0.54268
Acetyl-CoA carboxylase 2	Acacb	E9Q4Z2	0	0	0	0	0	0	0	4.3233e-05	-26.5754	-26.5754	-26.5754	-26.5754	-26.5754	-26.5754	-26.5754	-14.4972	0.391002	0	1	1	NA	NA	0.54268	0.54268
Collagen alpha-1(I) chain	Col1a1	P11087	0	0	0	0	7.89456e-05	0	0	0	-26.5754	-26.5754	-26.5754	-26.5754	-13.6286	-26.5754	-26.5754	-26.5754	0.391002	0	1	1	NA	NA	0.54268	0.54268
Protein disulfide-isomerase	P4hb	P09103	0	0	0	0	0	0	0	0.000174449	-26.5754	-26.5754	-26.5754	-26.5754	-26.5754	-26.5754	-26.5754	-12.4848	0.391002	0	1	1	NA	NA	0.54268	0.54268
Actin-related protein 2/3 complex subunit 4	Arpc4	P59999	0	0	0	0	0.000408544	0	0	0	-26.5754	-26.5754	-26.5754	-26.5754	-11.2572	-26.5754	-26.5754	-26.5754	0.391002	0	1	1	NA	NA	0.54268	0.54268
Mitochondrial import inner membrane translocase subunit Tim21	Timm21	Q8CCM6	0	0	0	0	0	0	0	0.000142051	-26.5754	-26.5754	-26.5754	-26.5754	-26.5754	-26.5754	-26.5754	-12.7812	0.391002	0	1	1	NA	NA	0.54268	0.54268
Polyribonucleotide nucleotidyltransferase 1, mitochondrial	Pnpt1	Q8K1R3	0	0	0	0	0	0	9.45952e-05	0	-26.5754	-26.5754	-26.5754	-26.5754	-26.5754	-26.5754	-13.3677	-26.5754	0.391002	0	1	1	NA	NA	0.54268	0.54268
Malonyl-CoA decarboxylase, mitochondrial	Mlycd	Q99J39	0	0	0	0	0	0	0.000110934	0	-26.5754	-26.5754	-26.5754	-26.5754	-26.5754	-26.5754	-13.1379	-26.5754	0.391002	0	1	1	NA	NA	0.54268	0.54268
Probable ATP-dependent RNA helicase DDX5	Ddx5	Q61656	0	0	0	0	0	0	0	5.7644e-05	-26.5754	-26.5754	-26.5754	-26.5754	-26.5754	-26.5754	-26.5754	-14.0822	0.391002	0	1	1	NA	NA	0.54268	0.54268
Maleylacetoacetate isomerase	Gstz1	Q9WVL0	0	0	0	0	0	0	0	0.000414316	-26.5754	-26.5754	-26.5754	-26.5754	-26.5754	-26.5754	-26.5754	-11.2369	0.391002	0	1	1	NA	NA	0.54268	0.54268
28S ribosomal protein S18a, mitochondrial	Mrps18a	Q99N85	0	0	0	0	0.000371403	0	0	0	-26.5754	-26.5754	-26.5754	-26.5754	-11.3947	-26.5754	-26.5754	-26.5754	0.391002	0	1	1	NA	NA	0.54268	0.54268
Plasminogen activator inhibitor 1 RNA-binding protein	Serbp1	Q9CY58	0	0	0	0	0	0	0	8.83874e-05	-26.5754	-26.5754	-26.5754	-26.5754	-26.5754	-26.5754	-26.5754	-13.4656	0.391002	0	1	1	NA	NA	0.54268	0.54268
T-complex protein 1 subunit theta	Cct8	P42932	0	0	0	0	0	0	0	6.62906e-05	-26.5754	-26.5754	-26.5754	-26.5754	-26.5754	-26.5754	-26.5754	-13.8806	0.391002	0	1	1	NA	NA	0.54268	0.54268
Collagen alpha-6(VI) chain	Col6a6	Q8C6K9	0	0	0	0	5.53582e-05	0	0	0	-26.5754	-26.5754	-26.5754	-26.5754	-14.1406	-26.5754	-26.5754	-26.5754	0.391002	0	1	1	NA	NA	0.54268	0.54268
Ras-interacting protein 1	Rasip1	Q3U0S6	0	0	9.25735e-05	0	0	0	0	0	-26.5754	-26.5754	-13.3989	-26.5754	-26.5754	-26.5754	-26.5754	-26.5754	0.391002	1	0	1	NA	NA	0.54268	0.54268
Heterogeneous nuclear ribonucleoproteins A2/B1	Hnrnpa2b1	O88569	0	0	0	0	0	0	0	0.000806237	-26.5754	-26.5754	-26.5754	-26.5754	-26.5754	-26.5754	-26.5754	-10.2765	0.391002	0	1	1	NA	NA	0.54268	0.54268
Proteasome subunit alpha type-6	Psma6	Q9QUM9	0	0	0	0	0	0	0	0.000147312	-26.5754	-26.5754	-26.5754	-26.5754	-26.5754	-26.5754	-26.5754	-12.7287	0.391002	0	1	1	NA	NA	0.54268	0.54268
Ig kappa chain V-II region 17S29.1	NA	P03976	0	0.000429252	0	0	0	0	0	0	-26.5754	-11.1859	-26.5754	-26.5754	-26.5754	-26.5754	-26.5754	-26.5754	0.391002	1	0	1	NA	NA	0.54268	0.54268
Four and a half LIM domains protein 2	Fhl2	O70433	0	0	0.000225648	0	0	0	0	0	-26.5754	-26.5754	-12.1136	-26.5754	-26.5754	-26.5754	-26.5754	-26.5754	0.391002	1	0	1	NA	NA	0.54268	0.54268
ATP-dependent RNA helicase A	Dhx9	O70133	0	0	0	0	0	0	0	2.66942e-05	-26.5754	-26.5754	-26.5754	-26.5754	-26.5754	-26.5754	-26.5754	-15.1926	0.391002	0	1	1	NA	NA	0.54268	0.54268
Peptidyl-prolyl cis-trans isomerase A	Ppia	P17742	0	0	0	0	0	0	0	0.000441937	-26.5754	-26.5754	-26.5754	-26.5754	-26.5754	-26.5754	-26.5754	-11.1438	0.391002	0	1	1	NA	NA	0.54268	0.54268
Aspartyl/asparaginyl beta-hydroxylase	Asph	Q8BSY0	0	0	0	0	0	0	0	7.18813e-05	-26.5754	-26.5754	-26.5754	-26.5754	-26.5754	-26.5754	-26.5754	-13.7638	0.391002	0	1	1	NA	NA	0.54268	0.54268
40S ribosomal protein S30	Fau	P62862	0	0	0	0	0	0.000633996	0	0	-26.5754	-26.5754	-26.5754	-26.5754	-26.5754	-10.6232	-26.5754	-26.5754	0.391002	0	1	1	NA	NA	0.54268	0.54268
Ras-related protein Rab-35	Rab35	Q6PHN9	0	0	0	0	0	0	0	0.000172932	-26.5754	-26.5754	-26.5754	-26.5754	-26.5754	-26.5754	-26.5754	-12.4974	0.391002	0	1	1	NA	NA	0.54268	0.54268
Laminin subunit alpha-5	Lama5	Q61001	0	0	0	0	2.02249e-05	0	0	0	-26.5754	-26.5754	-26.5754	-26.5754	-15.5928	-26.5754	-26.5754	-26.5754	0.391002	0	1	1	NA	NA	0.54268	0.54268
39S ribosomal protein L33, mitochondrial	Mrpl33	Q9CQP0	0	0	0	0.00116929	0	0	0	0	-26.5754	-26.5754	-26.5754	-9.74014	-26.5754	-26.5754	-26.5754	-26.5754	0.391002	1	0	1	NA	NA	0.54268	0.54268
T-complex protein 1 subunit zeta	Cct6a	P80317	0	0	0	0	0	0	0	0.000171441	-26.5754	-26.5754	-26.5754	-26.5754	-26.5754	-26.5754	-26.5754	-12.5099	0.391002	0	1	1	NA	NA	0.54268	0.54268
39S ribosomal protein L43, mitochondrial	Mrpl43	Q99N89	0	0.000386327	0	0	0	0	0	0	-26.5754	-11.3379	-26.5754	-26.5754	-26.5754	-26.5754	-26.5754	-26.5754	0.391002	1	0	1	NA	NA	0.54268	0.54268
Heterogeneous nuclear ribonucleoprotein A3	Hnrnpa3	Q8BG05	0	0	0	0	0	0	0	0.000198872	-26.5754	-26.5754	-26.5754	-26.5754	-26.5754	-26.5754	-26.5754	-12.2958	0.391002	0	1	1	NA	NA	0.54268	0.54268
Plastin-2	Lcp1	Q61233	0	0	0	0	0	0	0	0.000312513	-26.5754	-26.5754	-26.5754	-26.5754	-26.5754	-26.5754	-26.5754	-11.6438	0.391002	0	1	1	NA	NA	0.54268	0.54268
Dual specificity protein phosphatase 3	Dusp3	Q9D7X3	0	0	0	0	0	0	0	0.000198872	-26.5754	-26.5754	-26.5754	-26.5754	-26.5754	-26.5754	-26.5754	-12.2958	0.391002	0	1	1	NA	NA	0.54268	0.54268
Fragile X mental retardation syndrome-related protein 1	Fxr1	Q61584	0	0	0	0	7.16743e-05	0	0	0	-26.5754	-26.5754	-26.5754	-26.5754	-13.768	-26.5754	-26.5754	-26.5754	0.391002	0	1	1	NA	NA	0.54268	0.54268
Superoxide dismutase [Cu-Zn]	Sod1	P08228	0	0.000321939	0	0	0	0	0	0	-26.5754	-11.6009	-26.5754	-26.5754	-26.5754	-26.5754	-26.5754	-26.5754	0.391002	1	0	1	NA	NA	0.54268	0.54268
Transmembrane protein 143	Tmem143	Q8VD26	0	0	0	0	0	0	7.8223e-05	0	-26.5754	-26.5754	-26.5754	-26.5754	-26.5754	-26.5754	-13.6419	-26.5754	0.391002	0	1	1	NA	NA	0.54268	0.54268
28S ribosomal protein S35, mitochondrial	Mrps35	Q8BJZ4	0	0	0	0	0	0	0.000112989	0	-26.5754	-26.5754	-26.5754	-26.5754	-26.5754	-26.5754	-13.1114	-26.5754	0.391002	0	1	1	NA	NA	0.54268	0.54268
Protein flightless-1 homolog	Flii	Q9JJ28	0	0	0	0	0	0	0	4.11459e-05	-26.5754	-26.5754	-26.5754	-26.5754	-26.5754	-26.5754	-26.5754	-14.5685	0.391002	0	1	1	NA	NA	0.54268	0.54268
Actin-related protein 2/3 complex subunit 3	Arpc3	Q9JM76	0	0	0	0	0	0	0	0.000189402	-26.5754	-26.5754	-26.5754	-26.5754	-26.5754	-26.5754	-26.5754	-12.3662	0.391002	0	1	1	NA	NA	0.54268	0.54268
Complement C1q subcomponent subunit A	C1qa	P98086	0	0.000297175	0	0	0	0	0	0	-26.5754	-11.7164	-26.5754	-26.5754	-26.5754	-26.5754	-26.5754	-26.5754	0.391002	1	0	1	NA	NA	0.54268	0.54268
40S ribosomal protein S12	Rps12	P63323	0	0	0	0	0	0	0.000271173	0	-26.5754	-26.5754	-26.5754	-26.5754	-26.5754	-26.5754	-11.8484	-26.5754	0.391002	0	1	1	NA	NA	0.54268	0.54268
Signal recognition particle 9 kDa protein	Srp9	P49962	0	0	0	0	0.000544725	0	0	0	-26.5754	-26.5754	-26.5754	-26.5754	-10.8422	-26.5754	-26.5754	-26.5754	0.391002	0	1	1	NA	NA	0.54268	0.54268
39S ribosomal protein L2, mitochondrial	Mrpl2	Q9D773	0	0	0	0.000165354	0	0	0	0	-26.5754	-26.5754	-26.5754	-12.5621	-26.5754	-26.5754	-26.5754	-26.5754	0.391002	1	0	1	NA	NA	0.54268	0.54268
MICOS complex subunit Mic27	Apool	Q78IK4	0	0	0	0	0	0	0	0.000205729	-26.5754	-26.5754	-26.5754	-26.5754	-26.5754	-26.5754	-26.5754	-12.2469	0.391002	0	1	1	NA	NA	0.54268	0.54268
Nuclear mitotic apparatus protein 1	Numa1	E9Q7G0	0	0	0	0	2.30816e-05	0	0	0	-26.5754	-26.5754	-26.5754	-26.5754	-15.4023	-26.5754	-26.5754	-26.5754	0.391002	0	1	1	NA	NA	0.54268	0.54268
Serine/arginine-rich splicing factor 1	Srsf1	Q6PDM2	0	0	0	0	0	0	0	0.000355128	-26.5754	-26.5754	-26.5754	-26.5754	-26.5754	-26.5754	-26.5754	-11.4593	0.391002	0	1	1	NA	NA	0.54268	0.54268
39S ribosomal protein L46, mitochondrial	Mrpl46	Q9EQI8	0	0	0	0.000170521	0	0	0	0	-26.5754	-26.5754	-26.5754	-12.5177	-26.5754	-26.5754	-26.5754	-26.5754	0.391002	1	0	1	NA	NA	0.54268	0.54268
Probable leucine--tRNA ligase, mitochondrial	Lars2	Q8VDC0	0	0	0	0	0	0	0	5.90708e-05	-26.5754	-26.5754	-26.5754	-26.5754	-26.5754	-26.5754	-26.5754	-14.047	0.391002	0	1	1	NA	NA	0.54268	0.54268
39S ribosomal protein L16, mitochondrial	Mrpl16	Q99N93	0	0.000266432	0	0	0	0	0	0	-26.5754	-11.8739	-26.5754	-26.5754	-26.5754	-26.5754	-26.5754	-26.5754	0.391002	1	0	1	NA	NA	0.54268	0.54268
39S ribosomal protein L27, mitochondrial	Mrpl27	Q99N92	0	0.000482909	0	0	0	0	0	0	-26.5754	-11.0159	-26.5754	-26.5754	-26.5754	-26.5754	-26.5754	-26.5754	0.391002	1	0	1	NA	NA	0.54268	0.54268
40S ribosomal protein S6	Rps6	P62754	0	0	0	0	0.000281754	0	0	0	-26.5754	-26.5754	-26.5754	-26.5754	-11.7932	-26.5754	-26.5754	-26.5754	0.391002	0	1	1	NA	NA	0.54268	0.54268
Rho GTPase-activating protein 24	Arhgap24	Q8C4V1	0.000215966	0	0	0	0	0	0	0	-12.1768	-26.5754	-26.5754	-26.5754	-26.5754	-26.5754	-26.5754	-26.5754	0.391002	1	0	1	NA	NA	0.54268	0.54268
Phosphoglucomutase-like protein 5	Pgm5	Q8BZF8	0	0	0	0	0.000175718	0	0	0	-26.5754	-26.5754	-26.5754	-26.5754	-12.4744	-26.5754	-26.5754	-26.5754	0.391002	0	1	1	NA	NA	0.54268	0.54268
Chloride intracellular channel protein 1	Clic1	Q9Z1Q5	0	0	0	0	0	0	0	0.000147312	-26.5754	-26.5754	-26.5754	-26.5754	-26.5754	-26.5754	-26.5754	-12.7287	0.391002	0	1	1	NA	NA	0.54268	0.54268
Protein disulfide-isomerase A3	Pdia3	P27773	0	0	0	0	0	0	0	0.000139559	-26.5754	-26.5754	-26.5754	-26.5754	-26.5754	-26.5754	-26.5754	-12.8067	0.391002	0	1	1	NA	NA	0.54268	0.54268
Rho GDP-dissociation inhibitor 1	Arhgdia	Q99PT1	0	0	0	0	0	0	0	0.000172932	-26.5754	-26.5754	-26.5754	-26.5754	-26.5754	-26.5754	-26.5754	-12.4974	0.391002	0	1	1	NA	NA	0.54268	0.54268
Heat shock protein beta-7	Hspb7	P35385	0	0	0	0	0	0.000350366	0	0	-26.5754	-26.5754	-26.5754	-26.5754	-26.5754	-11.4788	-26.5754	-26.5754	0.391002	0	1	1	NA	NA	0.54268	0.54268
Peptidyl-prolyl cis-trans isomerase F, mitochondrial	Ppif	Q99KR7	0	0	0	0	0	0	0.000184891	0	-26.5754	-26.5754	-26.5754	-26.5754	-26.5754	-26.5754	-12.401	-26.5754	0.391002	0	1	1	NA	NA	0.54268	0.54268
Mitochondrial amidoxime reducing component 2	Mtarc2	Q922Q1	0	0	0	0	0	0	0.000214084	0	-26.5754	-26.5754	-26.5754	-26.5754	-26.5754	-26.5754	-12.1895	-26.5754	0.391002	0	1	1	NA	NA	0.54268	0.54268
Complex I intermediate-associated protein 30, mitochondrial	Ndufaf1	Q9CWX2	0	0	0	0	0	0	0.000214084	0	-26.5754	-26.5754	-26.5754	-26.5754	-26.5754	-26.5754	-12.1895	-26.5754	0.391002	0	1	1	NA	NA	0.54268	0.54268
Protein transport protein Sec23A	Sec23a	Q01405	0	0	0	0	0	0	7.09464e-05	0	-26.5754	-26.5754	-26.5754	-26.5754	-26.5754	-26.5754	-13.7827	-26.5754	0.391002	0	1	1	NA	NA	0.54268	0.54268
Proteasome subunit alpha type-3	Psma3	O70435	0	0	0	0	0.000291817	0	0	0	-26.5754	-26.5754	-26.5754	-26.5754	-11.7426	-26.5754	-26.5754	-26.5754	0.391002	0	1	1	NA	NA	0.54268	0.54268
Sorbin and SH3 domain-containing protein 1	Sorbs1	Q62417	0	0	0	3.81585e-05	0	0	0	0	-26.5754	-26.5754	-26.5754	-14.6773	-26.5754	-26.5754	-26.5754	-26.5754	0.391002	1	0	1	NA	NA	0.54268	0.54268
Nucleophosmin	Npm1	Q61937	0	0	0	0	0	0	0	0.000241057	-26.5754	-26.5754	-26.5754	-26.5754	-26.5754	-26.5754	-26.5754	-12.0183	0.391002	0	1	1	NA	NA	0.54268	0.54268
Leucine-rich repeat-containing protein 15	Lrrc15	Q80X72	0	0	0	0.000213151	0	0	0	0	-26.5754	-26.5754	-26.5754	-12.1958	-26.5754	-26.5754	-26.5754	-26.5754	0.391002	1	0	1	NA	NA	0.54268	0.54268
Xin actin-binding repeat-containing protein 1	Xirp1	O70373	0	8.37566e-05	0	0	0	0	0	0	-26.5754	-13.5433	-26.5754	-26.5754	-26.5754	-26.5754	-26.5754	-26.5754	0.391002	1	0	1	NA	NA	0.54268	0.54268
Serpin B5	Serpinb5	P70124	0.000604704	0	0	0	0	0	0	0	-10.6915	-26.5754	-26.5754	-26.5754	-26.5754	-26.5754	-26.5754	-26.5754	0.391002	1	0	1	NA	NA	0.54268	0.54268
Methylmalonyl-CoA mutase, mitochondrial	Mmut	P16332	0	0	0	0	6.56295e-05	0	0	0	-26.5754	-26.5754	-26.5754	-26.5754	-13.8951	-26.5754	-26.5754	-26.5754	0.391002	0	1	1	NA	NA	0.54268	0.54268
Ubiquitin carboxyl-terminal hydrolase 5	Usp5	P56399	0	0	0	5.68403e-05	0	0	0	0	-26.5754	-26.5754	-26.5754	-14.1025	-26.5754	-26.5754	-26.5754	-26.5754	0.391002	1	0	1	NA	NA	0.54268	0.54268
Centrosomal protein of 112 kDa	Cep112	Q5PR68	6.42164e-05	0	0	0	0	0	0	0	-13.9265	-26.5754	-26.5754	-26.5754	-26.5754	-26.5754	-26.5754	-26.5754	0.391002	1	0	1	NA	NA	0.54268	0.54268
28S ribosomal protein S28, mitochondrial	Mrps28	Q9CY16	0	0.000367931	0	0	0	0	0	0	-26.5754	-11.4082	-26.5754	-26.5754	-26.5754	-26.5754	-26.5754	-26.5754	0.391002	1	0	1	NA	NA	0.54268	0.54268
Chromodomain-helicase-DNA-binding protein 6	Chd6	A3KFM7	0	0	0	0	0	0	1.33364e-05	0	-26.5754	-26.5754	-26.5754	-26.5754	-26.5754	-26.5754	-16.1932	-26.5754	0.391002	0	1	1	NA	NA	0.54268	0.54268
LIM zinc-binding domain-containing Nebulette	Nebl	Q9DC07	0	0	0	0	0	0	0	0.000128304	-26.5754	-26.5754	-26.5754	-26.5754	-26.5754	-26.5754	-26.5754	-12.928	0.391002	0	1	1	NA	NA	0.54268	0.54268
Protein SEC13 homolog	Sec13	Q9D1M0	0	0	0	0	0	0	0	0.000110484	-26.5754	-26.5754	-26.5754	-26.5754	-26.5754	-26.5754	-26.5754	-13.1437	0.391002	0	1	1	NA	NA	0.54268	0.54268
Arginine--tRNA ligase, cytoplasmic	Rars1	Q9D0I9	0	0	0	0	0	0	5.3521e-05	0	-26.5754	-26.5754	-26.5754	-26.5754	-26.5754	-26.5754	-14.1893	-26.5754	0.391002	0	1	1	NA	NA	0.54268	0.54268
Cytosol aminopeptidase	Lap3	Q9CPY7	0	0	0	0	0	0	7.26356e-05	0	-26.5754	-26.5754	-26.5754	-26.5754	-26.5754	-26.5754	-13.7488	-26.5754	0.391002	0	1	1	NA	NA	0.54268	0.54268
Long-chain fatty acid transport protein 1	Slc27a1	Q60714	0	7.25497e-05	0	0	0	0	0	0	-26.5754	-13.7505	-26.5754	-26.5754	-26.5754	-26.5754	-26.5754	-26.5754	0.391002	1	0	1	NA	NA	0.54268	0.54268
Eukaryotic translation initiation factor 2 subunit 2	Eif2s2	Q99L45	0	0	0	0	0	0.000116789	0	0	-26.5754	-26.5754	-26.5754	-26.5754	-26.5754	-13.0637	-26.5754	-26.5754	0.391002	0	1	1	NA	NA	0.54268	0.54268
Delta-sarcoglycan	Sgcd	P82347	0	0	0	0	0	0.000138687	0	0	-26.5754	-26.5754	-26.5754	-26.5754	-26.5754	-12.8158	-26.5754	-26.5754	0.391002	0	1	1	NA	NA	0.54268	0.54268
Band 4.1-like protein 2	Epb41l2	O70318	0	7.02413e-05	0	0	0	0	0	0	-26.5754	-13.7971	-26.5754	-26.5754	-26.5754	-26.5754	-26.5754	-26.5754	0.391002	1	0	1	NA	NA	0.54268	0.54268
Growth factor receptor-bound protein 2	Grb2	Q60631	0	0	0	0	0	0	0	0.000159097	-26.5754	-26.5754	-26.5754	-26.5754	-26.5754	-26.5754	-26.5754	-12.6177	0.391002	0	1	1	NA	NA	0.54268	0.54268
T-complex protein 1 subunit delta	Cct4	P80315	0	0	0	0	0	0	0	0.000102865	-26.5754	-26.5754	-26.5754	-26.5754	-26.5754	-26.5754	-26.5754	-13.2468	0.391002	0	1	1	NA	NA	0.54268	0.54268
Protein POF1B	Pof1b	Q8K4L4	0.000160069	0	0	0	0	0	0	0	-12.6089	-26.5754	-26.5754	-26.5754	-26.5754	-26.5754	-26.5754	-26.5754	0.391002	1	0	1	NA	NA	0.54268	0.54268
Gephyrin	Gphn	Q8BUV3	0	0	0	0	0	0	4.90072e-05	0	-26.5754	-26.5754	-26.5754	-26.5754	-26.5754	-26.5754	-14.3164	-26.5754	0.391002	0	1	1	NA	NA	0.54268	0.54268
NADH dehydrogenase [ubiquinone] 1 alpha subcomplex assembly factor 3	Ndufaf3	Q9JKL4	0	0	0	0	0	0	0	0.000284102	-26.5754	-26.5754	-26.5754	-26.5754	-26.5754	-26.5754	-26.5754	-11.7813	0.391002	0	1	1	NA	NA	0.54268	0.54268
Galectin-3	Lgals3	P16110	0.000259159	0	0	0	0	0	0	0	-11.9138	-26.5754	-26.5754	-26.5754	-26.5754	-26.5754	-26.5754	-26.5754	0.391002	1	0	1	NA	NA	0.54268	0.54268
Matrix metalloproteinase-9	Mmp9	P41245	0	0.000127186	0	0	0	0	0	0	-26.5754	-12.9407	-26.5754	-26.5754	-26.5754	-26.5754	-26.5754	-26.5754	0.391002	1	0	1	NA	NA	0.54268	0.54268
High mobility group protein B1	Hmgb1	P63158	0	0	0	0	0	0	0	0.000477292	-26.5754	-26.5754	-26.5754	-26.5754	-26.5754	-26.5754	-26.5754	-11.0328	0.391002	0	1	1	NA	NA	0.54268	0.54268
Heterogeneous nuclear ribonucleoproteins C1/C2	Hnrnpc	Q9Z204	0	0	0	0	0	0	0	0.000233967	-26.5754	-26.5754	-26.5754	-26.5754	-26.5754	-26.5754	-26.5754	-12.0613	0.391002	0	1	1	NA	NA	0.54268	0.54268
Heat shock 70 kDa protein 12B	Hspa12b	Q9CZJ2	0	0	9.50096e-05	0	0	0	0	0	-26.5754	-26.5754	-13.3614	-26.5754	-26.5754	-26.5754	-26.5754	-26.5754	0.391002	1	0	1	NA	NA	0.54268	0.54268
T-complex protein 1 subunit eta	Cct7	P80313	0	0	0	0	0	0	0	9.94358e-05	-26.5754	-26.5754	-26.5754	-26.5754	-26.5754	-26.5754	-26.5754	-13.2957	0.391002	0	1	1	NA	NA	0.54268	0.54268
Thymosin beta-4	Tmsb4x	P20065	0	0	0	0	0	0	0	0.00198872	-26.5754	-26.5754	-26.5754	-26.5754	-26.5754	-26.5754	-26.5754	-8.97394	0.391002	0	1	1	NA	NA	0.54268	0.54268
Complement C1q subcomponent subunit B	C1qb	P14106	0	0.000190779	0	0	0	0	0	0	-26.5754	-12.3557	-26.5754	-26.5754	-26.5754	-26.5754	-26.5754	-26.5754	0.391002	1	0	1	NA	NA	0.54268	0.54268
Heterogeneous nuclear ribonucleoprotein L	Hnrnpl	Q8R081	0	0	0	0	0	0	0	6.21474e-05	-26.5754	-26.5754	-26.5754	-26.5754	-26.5754	-26.5754	-26.5754	-13.9737	0.391002	0	1	1	NA	NA	0.54268	0.54268
Peptidyl-tRNA hydrolase ICT1, mitochondrial	Mrpl58	Q8R035	0	0	0	0.000237246	0	0	0	0	-26.5754	-26.5754	-26.5754	-12.0413	-26.5754	-26.5754	-26.5754	-26.5754	0.391002	1	0	1	NA	NA	0.54268	0.54268
AP-2 complex subunit mu	Ap2m1	P84091	0	0.000103021	0	0	0	0	0	0	-26.5754	-13.2446	-26.5754	-26.5754	-26.5754	-26.5754	-26.5754	-26.5754	0.391002	1	0	1	NA	NA	0.54268	0.54268
Filamin-A-interacting protein 1	Filip1	Q9CS72	5.2583e-05	0	0	0	0	0	0	0	-14.2148	-26.5754	-26.5754	-26.5754	-26.5754	-26.5754	-26.5754	-26.5754	0.391002	1	0	1	NA	NA	0.54268	0.54268
LIM and cysteine-rich domains protein 1	Lmcd1	Q8VEE1	0	0	0	0	0	0	0	9.70106e-05	-26.5754	-26.5754	-26.5754	-26.5754	-26.5754	-26.5754	-26.5754	-13.3313	0.391002	0	1	1	NA	NA	0.54268	0.54268
60S acidic ribosomal protein P2	Rplp2	P99027	0	0	0	0	0	0	0	0.000662906	-26.5754	-26.5754	-26.5754	-26.5754	-26.5754	-26.5754	-26.5754	-10.5589	0.391002	0	1	1	NA	NA	0.54268	0.54268
AP-2 complex subunit beta	Ap2b1	Q9DBG3	0	4.90574e-05	0	0	0	0	0	0	-26.5754	-14.3149	-26.5754	-26.5754	-26.5754	-26.5754	-26.5754	-26.5754	0.391002	1	0	1	NA	NA	0.54268	0.54268
Myelin basic protein	Mbp	P04370	0	0	0	0	0	0	0	0.000220969	-26.5754	-26.5754	-26.5754	-26.5754	-26.5754	-26.5754	-26.5754	-12.1438	0.391002	0	1	1	NA	NA	0.54268	0.54268
Calreticulin	Calr	P14211	0	0	0	0	0	0	0	0.000207158	-26.5754	-26.5754	-26.5754	-26.5754	-26.5754	-26.5754	-26.5754	-12.2369	0.391002	0	1	1	NA	NA	0.54268	0.54268
V-set and immunoglobulin domain-containing protein 8	Vsig8	Q6P3A4	0	0	0	0.000310038	0	0	0	0	-26.5754	-26.5754	-26.5754	-11.6552	-26.5754	-26.5754	-26.5754	-26.5754	0.391002	1	0	1	NA	NA	0.54268	0.54268
Keratin-associated protein 9-3	Krtap9-3	Q3V2C1	0	0	0	0.000779524	0	0	0	0	-26.5754	-26.5754	-26.5754	-10.3251	-26.5754	-26.5754	-26.5754	-26.5754	0.391002	1	0	1	NA	NA	0.54268	0.54268
Fibrinogen alpha chain	Fga	E9PV24	0	5.92072e-05	0	0	0	0	0	0	-26.5754	-14.0436	-26.5754	-26.5754	-26.5754	-26.5754	-26.5754	-26.5754	0.391002	1	0	1	NA	NA	0.54268	0.54268
NEDD8-conjugating enzyme Ubc12	Ube2m	P61082	0	0	0	0	0	0	0.000193695	0	-26.5754	-26.5754	-26.5754	-26.5754	-26.5754	-26.5754	-12.3339	-26.5754	0.391002	0	1	1	NA	NA	0.54268	0.54268
28S ribosomal protein S23, mitochondrial	Mrps23	Q8VE22	0	0	0	0	0	0	0	0.000198872	-26.5754	-26.5754	-26.5754	-26.5754	-26.5754	-26.5754	-26.5754	-12.2958	0.391002	0	1	1	NA	NA	0.54268	0.54268
Hypoxia up-regulated protein 1	Hyou1	Q9JKR6	0	0	0	0	0	0	3.6645e-05	0	-26.5754	-26.5754	-26.5754	-26.5754	-26.5754	-26.5754	-14.7356	-26.5754	0.391002	0	1	1	NA	NA	0.54268	0.54268
Transmembrane emp24 domain-containing protein 10	Tmed10	Q9D1D4	0	0	0	0	0	0	0.000162704	0	-26.5754	-26.5754	-26.5754	-26.5754	-26.5754	-26.5754	-12.5854	-26.5754	0.391002	0	1	1	NA	NA	0.54268	0.54268
Flotillin-1	Flot1	O08917	0	0	0	0	0	0	0	8.28632e-05	-26.5754	-26.5754	-26.5754	-26.5754	-26.5754	-26.5754	-26.5754	-13.5587	0.391002	0	1	1	NA	NA	0.54268	0.54268
[3-methyl-2-oxobutanoate dehydrogenase [lipoamide]] kinase, mitochondrial	Bckdk	O55028	0	0	0	0	0	0	8.65445e-05	0	-26.5754	-26.5754	-26.5754	-26.5754	-26.5754	-26.5754	-13.496	-26.5754	0.391002	0	1	1	NA	NA	0.54268	0.54268
Eukaryotic translation initiation factor 4 gamma 1	Eif4g1	Q6NZJ6	0	0	0	0	0	0	0	3.38986e-05	-26.5754	-26.5754	-26.5754	-26.5754	-26.5754	-26.5754	-26.5754	-14.848	0.391002	0	1	1	NA	NA	0.54268	0.54268
Proliferation-associated protein 2G4	Pa2g4	P50580	0	0	0	0	0	0	0	0.000180792	-26.5754	-26.5754	-26.5754	-26.5754	-26.5754	-26.5754	-26.5754	-12.4333	0.391002	0	1	1	NA	NA	0.54268	0.54268
Coatomer subunit beta	Copb1	Q9JIF7	0	0	0	0	0	0	3.80149e-05	0	-26.5754	-26.5754	-26.5754	-26.5754	-26.5754	-26.5754	-14.6827	-26.5754	0.391002	0	1	1	NA	NA	0.54268	0.54268
Glycerophosphocholine phosphodiesterase GPCPD1	Gpcpd1	Q8C0L9	0	0	0	0	0	0	5.28259e-05	0	-26.5754	-26.5754	-26.5754	-26.5754	-26.5754	-26.5754	-14.2081	-26.5754	0.391002	0	1	1	NA	NA	0.54268	0.54268
Chromobox protein homolog 3	Cbx3	P23198	0	0	0	0	0	0	0	0.000189402	-26.5754	-26.5754	-26.5754	-26.5754	-26.5754	-26.5754	-26.5754	-12.3662	0.391002	0	1	1	NA	NA	0.54268	0.54268
WD repeat-containing protein 1	Wdr1	O88342	0	0	0	0	0	0	0	6.02641e-05	-26.5754	-26.5754	-26.5754	-26.5754	-26.5754	-26.5754	-26.5754	-14.0181	0.391002	0	1	1	NA	NA	0.54268	0.54268
Coronin-1A	Coro1a	O89053	0	0	0	0	0	0	0	0.000155978	-26.5754	-26.5754	-26.5754	-26.5754	-26.5754	-26.5754	-26.5754	-12.6463	0.391002	0	1	1	NA	NA	0.54268	0.54268
Adenylyl cyclase-associated protein 1	Cap1	P40124	0	0	0	0	0	0	0	0.000114734	-26.5754	-26.5754	-26.5754	-26.5754	-26.5754	-26.5754	-26.5754	-13.0893	0.391002	0	1	1	NA	NA	0.54268	0.54268
Prothymosin alpha	Ptma	P26350	0	0	0	0	0	0	0	0.000662906	-26.5754	-26.5754	-26.5754	-26.5754	-26.5754	-26.5754	-26.5754	-10.5589	0.391002	0	1	1	NA	NA	0.54268	0.54268
Serine hydroxymethyltransferase, mitochondrial	Shmt2	Q9CZN7	0	0	0	0	0	0	0	0.000142051	-26.5754	-26.5754	-26.5754	-26.5754	-26.5754	-26.5754	-26.5754	-12.7812	0.391002	0	1	1	NA	NA	0.54268	0.54268
Dual specificity protein phosphatase 14	Dusp14	Q9JLY7	0	0	0	0.000372045	0	0	0	0	-26.5754	-26.5754	-26.5754	-11.3922	-26.5754	-26.5754	-26.5754	-26.5754	0.391002	1	0	1	NA	NA	0.54268	0.54268
Heterogeneous nuclear ribonucleoprotein D-like	Hnrnpdl	Q9Z130	0	0	0	0	0	0	0	0.000116983	-26.5754	-26.5754	-26.5754	-26.5754	-26.5754	-26.5754	-26.5754	-13.0613	0.391002	0	1	1	NA	NA	0.54268	0.54268
Bis(5'-nucleosyl)-tetraphosphatase [asymmetrical]	Nudt2	P56380	0	0	0	0	0	0	0.00023927	0	-26.5754	-26.5754	-26.5754	-26.5754	-26.5754	-26.5754	-12.029	-26.5754	0.391002	0	1	1	NA	NA	0.54268	0.54268
Transgelin-2	Tagln2	Q9WVA4	0	0	0	0	0	0	0	0.000271189	-26.5754	-26.5754	-26.5754	-26.5754	-26.5754	-26.5754	-26.5754	-11.8484	0.391002	0	1	1	NA	NA	0.54268	0.54268
Heterogeneous nuclear ribonucleoprotein D0	Hnrnpd	Q60668	0	0	0	0	0	0	0	0.000157004	-26.5754	-26.5754	-26.5754	-26.5754	-26.5754	-26.5754	-26.5754	-12.6368	0.391002	0	1	1	NA	NA	0.54268	0.54268
Thymosin beta-10	Tmsb10	Q6ZWY8	0	0	0	0	0	0	0	0.00119323	-26.5754	-26.5754	-26.5754	-26.5754	-26.5754	-26.5754	-26.5754	-9.7109	0.391002	0	1	1	NA	NA	0.54268	0.54268
Proteasome activator complex subunit 1	Psme1	P97371	0	0	0	0	0	0	0	0.000205729	-26.5754	-26.5754	-26.5754	-26.5754	-26.5754	-26.5754	-26.5754	-12.2469	0.391002	0	1	1	NA	NA	0.54268	0.54268
Proliferating cell nuclear antigen	Pcna	P17918	0	0	0	0	0	0	0	0.000137153	-26.5754	-26.5754	-26.5754	-26.5754	-26.5754	-26.5754	-26.5754	-12.8318	0.391002	0	1	1	NA	NA	0.54268	0.54268
Proteasome activator complex subunit 2	Psme2	P97372	0	0	0	0	0	0	0	0.000147312	-26.5754	-26.5754	-26.5754	-26.5754	-26.5754	-26.5754	-26.5754	-12.7287	0.391002	0	1	1	NA	NA	0.54268	0.54268
COP9 signalosome complex subunit 4	Cops4	O88544	0	0	0	0	0	0	0	8.6466e-05	-26.5754	-26.5754	-26.5754	-26.5754	-26.5754	-26.5754	-26.5754	-13.4973	0.391002	0	1	1	NA	NA	0.54268	0.54268
Coactosin-like protein	Cotl1	Q9CQI6	0	0	0	0	0	0	0	0.00024859	-26.5754	-26.5754	-26.5754	-26.5754	-26.5754	-26.5754	-26.5754	-11.9739	0.391002	0	1	1	NA	NA	0.54268	0.54268
Enhancer of rudimentary homolog	Erh	P84089	0	0	0	0	0	0	0	0.000331453	-26.5754	-26.5754	-26.5754	-26.5754	-26.5754	-26.5754	-26.5754	-11.5589	0.391002	0	1	1	NA	NA	0.54268	0.54268
Histone H1.5	H1-5	P43276	0	0	0	0	0	0	0	0.000172932	-26.5754	-26.5754	-26.5754	-26.5754	-26.5754	-26.5754	-26.5754	-12.4974	0.391002	0	1	1	NA	NA	0.54268	0.54268
Tripartite motif-containing protein 29	Trim29	Q8R2Q0	0.000109946	0	0	0	0	0	0	0	-13.1508	-26.5754	-26.5754	-26.5754	-26.5754	-26.5754	-26.5754	-26.5754	0.391002	1	0	1	NA	NA	0.54268	0.54268
NADH dehydrogenase [ubiquinone] 1 beta subcomplex subunit 4	Ndufb4	Q9CQC7	0.00145129	0.00223211	0.00144415	0.00181889	0.0021789	0.00221899	0.00162704	0.00185614	-9.42844	-8.80737	-9.43556	-9.10272	-8.84218	-8.81588	-9.26353	-9.07347	0.248008	4	4	8	1.16065	0.214931	0.54268	0.54268
Heterogeneous nuclear ribonucleoprotein K	Hnrnpk	P61979	0.000142283	0.000353502	0.000235972	0.000267484	0.000320426	0.000217548	0.00023927	0.000740895	-12.7788	-11.466	-12.049	-11.8682	-11.6077	-12.1663	-12.029	-10.3984	0.403439	4	4	8	1.66282	0.733633	0.5459	0.5459
NADH dehydrogenase [ubiquinone] 1 beta subcomplex subunit 3	Ndufb3	Q9CQZ6	0	0.000643878	0	0.000454722	0.000680906	0.000924577	0.000508449	0	-26.5754	-10.6009	-26.5754	-11.1027	-10.5202	-10.0789	-10.9416	-26.5754	0.615019	2	3	5	Inf	Inf	0.738023	0.738023
NADH dehydrogenase [ubiquinone] 1 alpha subcomplex subunit 9, mitochondrial	Ndufa9	Q9DC69	0.00194068	0.0013177	0.00156729	0.00196694	0.00228024	0.00165134	0.00175001	0.00194247	-9.00922	-9.56775	-9.3175	-8.98983	-8.77659	-9.24214	-9.15841	-9.00789	0.0956484	4	4	8	1.13308	0.180246	0.492832	0.492832
60S ribosomal protein L28	Rpl28	P41105	0.000453528	0.00112679	0.00150432	0	0.000680906	0.000970806	0.00165246	0.00136724	-11.1065	-9.79356	-9.37666	-26.5754	-10.5202	-10.0085	-9.24116	-9.5145	0.375101	3	4	7	Inf	Inf	0.54268	0.54268
Filamin-A	Flna	Q8BTM8	0	6.41587e-05	5.13931e-05	5.82562e-05	0.000155082	6.3174e-05	4.34263e-05	3.53864e-05	-26.5754	-13.9278	-14.2478	-14.067	-12.6546	-13.9501	-14.4907	-14.786	0.431209	3	4	7	Inf	Inf	0.564648	0.564648
60S ribosomal protein L31	Rpl31	P62900	0.00181411	0.00202362	0.00120346	0.00116929	0.00136181	0.00174349	0.0010169	0.000994358	-9.10651	-8.94884	-9.69859	-9.74014	-9.52025	-9.1638	-9.94159	-9.97393	0.00932723	4	4	8	0.826907	-0.274204	0.160499	0.160499
Hydroxyacyl-coenzyme A dehydrogenase, mitochondrial	Hadh	Q61425	0.0017074	0.00143926	0.00155741	0.00168515	0.00224298	0.00156634	0.00167489	0.00157928	-9.19397	-9.44045	-9.32662	-9.2129	-8.80036	-9.31838	-9.22171	-9.30651	0.279543	4	4	8	1.10365	0.142279	0.54268	0.54268
Gelsolin	Gsn	P13020	0.000210943	0.000299478	5.59747e-05	0.000190349	0.00025336	0	0	0.000184997	-12.2108	-11.7052	-14.1246	-12.359	-11.9465	-26.5754	-26.5754	-12.4001	0.189458	4	2	6	0.543242	-0.880334	0.54268	0.54268
40S ribosomal protein S10	Rps10	P63325	0.000381918	0.000271107	0	0	0.000573394	0.000350366	0.000321126	0	-11.3544	-11.8488	-26.5754	-26.5754	-10.7682	-11.4788	-11.6045	-26.5754	0.356787	2	3	5	NA	NA	0.54268	0.54268
Aspartate--tRNA ligase, cytoplasmic	Dars1	Q922B2	0	0	8.4453e-05	0	0	0	0.000107042	0.000139559	-26.5754	-26.5754	-13.5313	-26.5754	-26.5754	-26.5754	-13.1894	-12.8067	0.377541	1	2	3	NA	NA	0.54268	0.54268
Protein-glutamine gamma-glutamyltransferase 2	Tgm2	P21981	0.000282719	0.000668965	0.00043762	0.000566926	0.000884293	0.00057636	0.000422607	0.000568205	-11.7883	-10.5458	-11.158	-10.7845	-10.1432	-10.7607	-11.2084	-10.7813	0.485322	4	4	8	1.48933	0.574668	0.608822	0.608822
Isoleucine--tRNA ligase, mitochondrial	Iars2	Q8BIJ6	0.000160541	4.55843e-05	0.000319501	0.000144867	0.000289234	0.000176733	0.000251975	0.000193592	-12.6047	-14.4208	-11.6118	-12.7529	-11.7554	-12.4661	-11.9544	-12.3346	0.23039	4	4	8	1.95092	0.964154	0.54268	0.54268
Alpha-enolase	Eno1	P17182	0.00162112	0.000931569	0.00107543	0.00116099	0.00150669	0.00103867	0.00129817	0.00177715	-9.26878	-10.068	-9.86086	-9.75041	-9.3744	-9.91103	-9.5893	-9.13621	0.214436	4	4	8	1.19555	0.257679	0.54268	0.54268
Desmoglein-1-beta	Dsg1b	Q7TSF1	0.000668357	0.00020333	0.000485605	0.000574386	0.000692852	0.000389296	0.000107042	6.97795e-05	-10.5471	-12.2638	-11.0079	-10.7657	-10.4951	-11.3268	-13.1894	-13.8066	0.338304	4	4	8	0.823291	-0.280526	0.54268	0.54268
40S ribosomal protein S4, X isoform	Rps4x	P62702	0.00181411	0.00137361	0.00152438	0.00127322	0.00163417	0.00118346	0.0010169	0.00145839	-9.10651	-9.5078	-9.35756	-9.61729	-9.25721	-9.72276	-9.94159	-9.4214	0.323226	4	4	8	0.893727	-0.162094	0.54268	0.54268
Palladin	Palld	Q9ET54	0	0	0.000110845	7.17982e-05	8.95929e-05	4.37958e-05	8.02815e-05	7.8502e-05	-26.5754	-26.5754	-13.139	-13.7655	-13.4461	-14.4785	-13.6044	-13.6367	0.191006	2	4	6	Inf	Inf	0.54268	0.54268
Serpin B6	Serpinb6	Q60854	0.000253132	0.000179687	0.000279873	0.000253798	0.0003167	0.000206417	0.000283786	0.000277495	-11.9478	-12.4421	-11.8029	-11.944	-11.6245	-12.2421	-11.7829	-11.8152	0.0775618	4	4	8	1.12681	0.172243	0.436644	0.436644
[Protein ADP-ribosylarginine] hydrolase-like protein 1	Adprhl1	Q8BGK2	0.000362823	0.000321939	0.000421209	0.00040925	0.000408544	0.000388322	0.000406759	0.000397743	-11.4284	-11.6009	-11.2131	-11.2547	-11.2572	-11.3304	-11.2635	-11.2958	0.351769	4	4	8	1.06745	0.0941652	0.54268	0.54268
60S ribosomal protein L18a	Rpl18a	P62717	0.000518318	0.000858505	0.000458459	0.000649603	0.000778178	0.000739662	0.00077478	0.000568205	-10.9138	-10.1859	-11.0909	-10.5881	-10.3276	-10.4008	-10.3339	-10.7813	0.4272	4	4	8	1.2319	0.30088	0.560585	0.560585
ATPase family AAA domain-containing protein 3	Atad3	Q925I1	0	0.000153762	0.000143696	8.14428e-05	0	0.000165596	0.000242841	0.000207776	-26.5754	-12.6669	-12.7646	-13.5837	-26.5754	-12.56	-12.0076	-12.2326	0.176026	3	3	6	NA	NA	0.542371	0.542371
Cytochrome c oxidase assembly protein COX20, mitochondrial	Cox20	Q9D7J4	0	0.000396233	0	0	0	0	0.000625784	0.000458935	-26.5754	-11.3013	-26.5754	-26.5754	-26.5754	-26.5754	-10.642	-11.0894	0.624565	1	2	3	NA	NA	0.740385	0.740385
Ig heavy chain V region 441	NA	P01806	0.00167457	0.00158493	0.0027772	0.00230859	0.00188559	0.00102415	0.00250313	0.0013768	-9.22199	-9.30135	-8.49215	-8.75877	-9.05076	-9.93135	-8.64204	-9.50445	0.210688	4	4	8	0.817472	-0.290758	0.54268	0.54268
40S ribosomal protein S8	Rps8	P62242	0.000604704	0.000643878	0.000200576	0.000454722	0.000453937	0.000184915	0.000169483	0.000580042	-10.6915	-10.6009	-12.2835	-11.1027	-11.1052	-12.4008	-12.5265	-10.7515	0.331139	4	4	8	0.789611	-0.340785	0.54268	0.54268
Bleomycin hydrolase	Blmh	Q8R016	0.000205371	0	0.000227067	0	0.000102778	8.37353e-05	0	0	-12.2494	-26.5754	-12.1045	-26.5754	-13.248	-13.5436	-26.5754	-26.5754	0.920465	2	2	4	NA	NA	0.974486	0.974486
Transcriptional activator protein Pur-beta	Purb	O35295	0.00042685	0.000303002	0.000212374	0.00032098	0.000400533	0.000391586	0.000299088	0.00035095	-11.1939	-11.6883	-12.201	-11.6052	-11.2858	-11.3183	-11.7071	-11.4764	0.181745	4	4	8	1.18309	0.242564	0.542371	0.542371
3-ketoacyl-CoA thiolase, mitochondrial	Acaa2	Q8BWT1	0.00932972	0.00925959	0.00796573	0.00824996	0.00946783	0.00903444	0.00968475	0.00828632	-6.74395	-6.75484	-6.97198	-6.9214	-6.72275	-6.79035	-6.69007	-6.91505	0.412527	4	4	8	1.05267	0.0740592	0.551648	0.551648
Myosin light chain kinase 3	Mylk3	Q3UIZ8	0	0.000119791	0.000139937	0	0	0.000154813	0.00018919	0.000115623	-26.5754	-13.0271	-12.8028	-26.5754	-26.5754	-12.6571	-12.3678	-13.0782	0.358967	2	3	5	NA	NA	0.54268	0.54268
NADH dehydrogenase [ubiquinone] iron-sulfur protein 7, mitochondrial	Ndufs7	Q9DC70	0.00159642	0.00144229	0.00134787	0.00185527	0.00174312	0.00115387	0.00146433	0.00127278	-9.29094	-9.43742	-9.53509	-9.07415	-9.1641	-9.75929	-9.41553	-9.61779	0.421783	4	4	8	0.916091	-0.126437	0.556246	0.556246
Elongation factor 1-gamma	Eef1g	Q9D8N0	0.000145129	0	0.000192553	0	0.00021789	0	0.000122028	0.00027842	-12.7503	-26.5754	-12.3424	-26.5754	-12.164	-26.5754	-13.0004	-11.8104	0.394661	2	3	5	NA	NA	0.54268	0.54268
Myosin-6	Myh6	Q02566	0.00434091	0.00617433	0.00232095	0.00411686	0.00460827	0.00334829	0.00140731	0.00386202	-7.84778	-7.3395	-8.75106	-7.92424	-7.76155	-8.22236	-9.47283	-8.01643	0.186398	4	4	8	0.787083	-0.345412	0.542371	0.542371
40S ribosomal protein SA	Rpsa	P14206	0.000219892	0.000156092	0	0.000165354	0.000165068	0.000134484	0.00012326	0.000421849	-12.1508	-12.6452	-26.5754	-12.5621	-12.5646	-12.8602	-12.9859	-11.211	0.365088	3	4	7	Inf	Inf	0.54268	0.54268
Spectrin alpha chain, non-erythrocytic 1	Sptan1	P16546	0.000814759	0.000975984	0.000481382	0.00080414	0.0011659	0.000474941	0.000235492	0.000383787	-10.2613	-10.0008	-11.0205	-10.2802	-9.74433	-11.0399	-12.052	-11.3474	0.192233	4	4	8	0.721017	-0.471894	0.54268	0.54268
Spectrin alpha chain, erythrocytic 1	Spta1	P08032	0.00146425	0.00132455	0.000670497	0.00107185	0.00180926	0.000578521	0.000283279	0.000497179	-9.41561	-9.56027	-10.5425	-9.86567	-9.11037	-10.7553	-11.7854	-10.9739	0.118124	4	4	8	0.639685	-0.644567	0.542371	0.542371
Alpha-1-antitrypsin 1-1	Serpina1a	P07758	0	0	0.000156972	0.000177935	0	0	0	0.000129699	-26.5754	-26.5754	-12.6371	-12.4563	-26.5754	-26.5754	-26.5754	-12.9124	0.37336	2	1	3	NA	NA	0.54268	0.54268
Endonuclease G, mitochondrial	Endog	O08600	0	0	0.000225648	0	0.000425566	0.00020803	0	0	-26.5754	-26.5754	-12.1136	-26.5754	-11.1983	-12.2309	-26.5754	-26.5754	0.625106	1	2	3	NA	NA	0.740385	0.740385
Isocitrate dehydrogenase [NADP] cytoplasmic	Idh1	O88844	0.000308785	0	0	0.000232199	0.000405646	0.00018885	0.000173089	0.000126939	-11.6611	-26.5754	-26.5754	-12.0723	-11.2675	-12.3704	-12.4961	-12.9435	0.193261	2	4	6	Inf	Inf	0.54268	0.54268
Bcl-2-like protein 13	Bcl2l13	P59017	0	0.000109596	0	0	0.000115899	0	0.000173089	0	-26.5754	-13.1554	-26.5754	-26.5754	-13.0747	-26.5754	-12.4961	-26.5754	0.625021	1	2	3	NA	NA	0.740385	0.740385
Caveolae-associated protein 4	Cavin4	A2AMM0	0.00079644	0.000628174	0.000587051	0.000798537	0.000797158	0.000595337	0.000496048	0.000630569	-10.2941	-10.6365	-10.7342	-10.2903	-10.2928	-10.714	-10.9772	-10.631	0.123522	4	4	8	0.895817	-0.158725	0.542371	0.542371
60S ribosomal protein L18	Rpl18	P35980	0	0	0.00021881	0	0	0	0.000462227	0.000180792	-26.5754	-26.5754	-12.158	-26.5754	-26.5754	-26.5754	-11.0791	-12.4333	0.35117	1	2	3	NA	NA	0.54268	0.54268
Ferritin heavy chain	Fth1	P09528	0.00138218	0.00134908	0.00126076	0.00129921	0.00155636	0.00147932	0.00145271	0.00113641	-9.49883	-9.5338	-9.63148	-9.58814	-9.3276	-9.40084	-9.42703	-9.78129	0.4536	4	4	8	1.06238	0.0872938	0.583423	0.583423
Troponin I, cardiac muscle	Tnni3	P48787	0.00151176	0.00214626	0.00110317	0.00136417	0.00204272	0.000739662	0.000677932	0.00132581	-9.36955	-8.86395	-9.82412	-9.51775	-8.93529	-10.4008	-10.5265	-9.5589	0.359408	4	4	8	0.820565	-0.28531	0.54268	0.54268
Aldehyde dehydrogenase, mitochondrial	Aldh2	P47738	0.000318265	0.000180738	0.000253359	0.000191462	0.000286697	0.000233577	0.000392487	0.000209339	-11.6174	-12.4337	-11.9465	-12.3506	-11.7681	-12.0637	-11.315	-12.2218	0.23903	4	4	8	1.20892	0.273716	0.54268	0.54268
Succinate--CoA ligase [ADP/GDP-forming] subunit alpha, mitochondrial	Suclg1	Q9WUM5	0.00463607	0.00372019	0.0050144	0.00363778	0.00499331	0.00425305	0.00485851	0.00425364	-7.75288	-8.07041	-7.6397	-8.10272	-7.64578	-7.87728	-7.68527	-7.87708	0.141909	4	4	8	1.08963	0.123833	0.542371	0.542371
Pregnancy zone protein	Pzp	Q61838	6.55703e-05	0	0.000130495	0.000312279	0.000180481	0.000106939	0.000196029	0.000287525	-13.8964	-26.5754	-12.9036	-11.6448	-12.4358	-13.1908	-12.3166	-11.764	0.31772	3	4	7	Inf	Inf	0.54268	0.54268
28S ribosomal protein S26, mitochondrial	Mrps26	Q80ZS3	0	0	0.000313945	0	0	0	0.00044213	0.000345864	-26.5754	-26.5754	-11.6372	-26.5754	-26.5754	-26.5754	-11.1432	-11.4975	0.373343	1	2	3	NA	NA	0.54268	0.54268
Branched-chain-amino-acid aminotransferase, mitochondrial	Bcat2	O35855	0.000164919	0.000234138	0.000109405	0.000186023	0.000185702	0.000100863	0.000323559	0.000271189	-12.5659	-12.0603	-13.1579	-12.3922	-12.3946	-13.2752	-11.5936	-11.8484	0.674918	4	4	8	1.49302	0.578229	0.772303	0.772303
28S ribosomal protein S27, mitochondrial	Mrps27	Q8BK72	0	0	0.000100288	0.000170521	0	0.000138687	0.000211854	0.000124295	-26.5754	-26.5754	-13.2834	-12.5177	-26.5754	-12.8158	-12.2046	-12.9738	0.36829	2	3	5	NA	NA	0.54268	0.54268
Histone H4	H4c1	P62806	0.010225	0.00257551	0.00284453	0.00297636	0.00297123	0.00403452	0.00147912	0.00361585	-6.61175	-8.60092	-8.45759	-8.39223	-8.39472	-7.95338	-9.40103	-8.11145	0.480614	4	4	8	0.89798	-0.155245	0.60458	0.60458
Ig heavy chain V-III region J606	NA	P01801	0.000837283	0.0035661	0.00462867	0.00209872	0.00188559	0.00221899	0.00281603	0.00122383	-10.222	-8.13143	-7.75518	-8.89627	-9.05076	-8.81588	-8.47212	-9.67437	0.632302	4	4	8	1.01645	0.0235364	0.743118	0.743118
Dehydrogenase/reductase SDR family member 4	Dhrs4	Q99LB2	0.000846586	0.000600953	0.000561613	0.00127322	0.0007263	0.000665696	0.000610139	0.000729196	-10.206	-10.7004	-10.7981	-9.61729	-10.4271	-10.5528	-10.6786	-10.4214	0.45484	4	4	8	0.906193	-0.14211	0.583423	0.583423
High mobility group protein HMG-I/HMG-Y	Hmga1	P17095	0.00151176	0.000643878	0.00100288	0.000682083	0.00113484	0.000739662	0.000508449	0.000662906	-9.36955	-10.6009	-9.96162	-10.5177	-9.78328	-10.4008	-10.9416	-10.5589	0.315748	4	4	8	0.844577	-0.243699	0.54268	0.54268
Junctophilin-2	Jph2	Q9ET78	0.000435387	0.000549443	0.000641843	0.000509289	0.000544725	0.000414211	0.000433877	0.000556841	-11.1654	-10.8297	-10.6055	-10.9392	-10.8422	-11.2373	-11.1704	-10.8104	0.582499	4	4	8	0.943589	-0.0837695	0.708319	0.708319
39S ribosomal protein L21, mitochondrial	Mrpl21	Q9D1N9	0	0.000223958	0.000209297	0	0	0.000289433	0.000265278	0.000172932	-26.5754	-12.1244	-12.2221	-26.5754	-26.5754	-11.7544	-11.8802	-12.4974	0.363726	2	3	5	NA	NA	0.54268	0.54268
HIG1 domain family member 1A, mitochondrial	Higd1a	Q9JLR9	0	0.000772654	0.000722073	0.000545667	0.000817087	0.000887594	0.000406759	0.000596615	-26.5754	-10.3379	-10.4355	-10.8397	-10.2572	-10.1378	-11.2635	-10.7109	0.4087	3	4	7	Inf	Inf	0.548168	0.548168
Troponin C, slow skeletal and cardiac muscles	Tnnc1	P19123	0.000604704	0.000858505	0	0	0	0.000369831	0	0.000331453	-10.6915	-10.1859	-26.5754	-26.5754	-26.5754	-11.4008	-26.5754	-11.5589	0.939469	2	2	4	NA	NA	0.984823	0.984823
Hydroxysteroid dehydrogenase-like protein 2	Hsdl2	Q2TPA8	0	0.000381558	0.000534869	0.000303148	0.00060525	0.000287646	0.000414292	0.000331453	-26.5754	-11.3558	-10.8685	-11.6876	-10.6902	-11.7634	-11.237	-11.5589	0.413957	3	4	7	Inf	Inf	0.552147	0.552147
28S ribosomal protein S34, mitochondrial	Mrps34	Q9JIK9	0	0.000198116	0	0	0	0.000170691	0.000312892	0	-26.5754	-12.3013	-26.5754	-26.5754	-26.5754	-12.5162	-11.642	-26.5754	0.399013	1	2	3	NA	NA	0.54268	0.54268
Aconitate hydratase, mitochondrial	Aco2	Q99KI0	0.00431119	0.00421172	0.00458729	0.00420484	0.00474231	0.00446408	0.00466577	0.00402423	-7.8577	-7.89137	-7.76814	-7.89373	-7.72019	-7.80742	-7.74367	-7.95707	0.366726	4	4	8	1.03352	0.0475635	0.54268	0.54268
Asporin	Aspn	Q99MQ4	0.000506264	0.000718748	0.000335848	0.000571047	0.000760081	0.000206417	0.000141893	0.000508742	-10.9478	-10.4422	-11.5399	-10.7741	-10.3615	-12.2421	-12.7828	-10.9408	0.307771	4	4	8	0.775482	-0.366835	0.54268	0.54268
ATP synthase subunit e, mitochondrial	Atp5me	Q06185	0.00725645	0.00611685	0.00782246	0.00682083	0.00680906	0.00804382	0.00483027	0.00596615	-7.10652	-7.35299	-6.99816	-7.19583	-7.19833	-6.9579	-7.69368	-7.38898	0.559477	4	4	8	0.936389	-0.0948203	0.683972	0.683972
NADH dehydrogenase [ubiquinone] 1 alpha subcomplex subunit 7	Ndufa7	Q9Z1P6	0.00614007	0.00495291	0.00536926	0.00503692	0.00628528	0.00648626	0.00594494	0.00443637	-7.34753	-7.6575	-7.54106	-7.63324	-7.3138	-7.26839	-7.39412	-7.8164	0.476593	4	4	8	1.08031	0.11144	0.602012	0.602012
F-box only protein 50	Nccrp1	G3X9C2	0.000483763	0.000343402	0.000722073	0.000272833	0.000453937	0.000517763	0.000271173	0.000198872	-11.0134	-11.5078	-10.4355	-11.8396	-11.1052	-10.9154	-11.8484	-12.2958	0.472938	4	4	8	0.887638	-0.171956	0.598223	0.598223
Estradiol 17-beta-dehydrogenase 8	Hsd17b8	P50171	0.000940651	0.000572336	0.000624014	0.000707346	0.000907874	0.000575292	0.000451955	0.000515593	-10.054	-10.7708	-10.6461	-10.4653	-10.1052	-10.7634	-11.1115	-10.9215	0.154239	4	4	8	0.855876	-0.224527	0.542371	0.542371
Tubulin alpha-4A chain	Tuba4a	P68368	0.00203181	0	0	0.000545667	0	0.000576936	0	0.000477292	-8.94301	-26.5754	-26.5754	-10.8397	-26.5754	-10.7593	-26.5754	-11.0328	0.946012	2	2	4	NA	NA	0.989407	0.989407
Transcription factor A, mitochondrial	Tfam	P40630	0.00168453	0.00147172	0.00077365	0.000682083	0.00145908	0.000792495	0.00065372	0.000781282	-9.21343	-9.40827	-10.336	-10.5177	-9.42071	-10.3013	-10.579	-10.3219	0.292521	4	4	8	0.848766	-0.236562	0.54268	0.54268
Cytochrome c oxidase subunit 5A, mitochondrial	Cox5a	P12787	0.00226764	0.00177067	0.00135389	0.00136417	0.00170226	0.00152555	0.00165246	0.00111865	-8.78459	-9.14148	-9.52867	-9.51775	-9.19832	-9.35644	-9.24116	-9.80401	0.382644	4	4	8	0.913201	-0.130996	0.54268	0.54268
40S ribosomal protein S28	Rps28	P62858	0	0	0	0.000682083	0	0	0.000762674	0.000745769	-26.5754	-26.5754	-26.5754	-10.5177	-26.5754	-26.5754	-10.3566	-10.389	0.386648	1	2	3	NA	NA	0.54268	0.54268
Collagen alpha-1(XV) chain	Col15a1	O35206	7.77477e-05	0.000110379	3.43844e-05	5.84643e-05	0.000155636	0	0	0	-13.6507	-13.1451	-14.8275	-14.0618	-12.6494	-26.5754	-26.5754	-26.5754	0.0743528	4	1	5	0.500451	-0.998699	0.421734	0.421734
40S ribosomal protein S15	Rps15	P62843	0	0.000454502	0	0	0.000480639	0.000522114	0	0	-26.5754	-11.1034	-26.5754	-26.5754	-11.0227	-10.9033	-26.5754	-26.5754	0.383971	1	2	3	NA	NA	0.54268	0.54268
ATP synthase subunit delta, mitochondrial	Atp5f1d	Q9D3D9	0.000403136	0.000286168	0.000267435	0.000303148	0.000302625	0.000493108	0.000451955	0.000220969	-11.2764	-11.7708	-11.8685	-11.6876	-11.6901	-10.9858	-11.1115	-12.1438	0.662504	4	4	8	1.22317	0.290629	0.763848	0.763848
Metaxin-2	Mtx2	O88441	0.000483763	0.000171701	0.000240691	0.000272833	0.000272362	0.000221899	0.000271173	0.000198872	-11.0134	-12.5077	-12.0205	-11.8396	-11.8421	-12.1377	-11.8484	-12.2958	0.551082	4	4	8	0.927729	-0.108224	0.677341	0.677341
Histidine ammonia-lyase	Hal	P35492	0.00025196	0	0	0	0	6.16385e-05	0	0	-11.9545	-26.5754	-26.5754	-26.5754	-26.5754	-13.9856	-26.5754	-26.5754	0.933014	1	1	2	NA	NA	0.982773	0.982773
Myosin light chain 3	Myl3	P09542	0.00379314	0.00362913	0.00142227	0.00347242	0.00371403	0.00292503	0.0010169	0.0023503	-8.04239	-8.10616	-9.45758	-8.16984	-8.07279	-8.41733	-9.94159	-8.73293	0.060361	4	4	8	0.79424	-0.332353	0.36867	0.36867
ATP synthase subunit g, mitochondrial	Atp5mg	Q9CPQ8	0.00263871	0.00257551	0.00196929	0.00223227	0.00247602	0.00322761	0.00258847	0.00198872	-8.56595	-8.60092	-8.9881	-8.80726	-8.65775	-8.27531	-8.59368	-8.97394	0.478073	4	4	8	1.09921	0.13647	0.603046	0.603046
ATP synthase protein 8	Mtatp8	P03930	0.00226764	0.0016097	0.00120346	0.00136417	0.00136181	0.00110949	0.0020338	0.000994358	-8.78459	-9.27899	-9.69859	-9.51775	-9.52025	-9.81587	-8.9416	-9.97393	0.524726	4	4	8	0.927169	-0.109096	0.649321	0.649321
F-actin-capping protein subunit beta	Capzb	P47757	0.000351119	0.00074773	0	0.000440054	0.000702871	0	0	0.000192456	-11.4757	-10.3852	-26.5754	-11.15	-10.4744	-26.5754	-26.5754	-12.3431	0.387039	3	2	5	NA	NA	0.54268	0.54268
NADH dehydrogenase [ubiquinone] 1 alpha subcomplex subunit 11	Ndufa11	Q9D8B4	0.000483763	0.000343402	0.000481382	0.000363778	0	0.000443797	0.000949105	0.000928068	-11.0134	-11.5078	-11.0205	-11.4246	-26.5754	-11.1378	-10.0411	-10.0735	0.492103	4	3	7	1.45379	0.539822	0.61573	0.61573
Prelamin-A/C	Lmna	P48678	0.00151993	0.000417651	9.75775e-05	0.000147477	0.000588892	0.000119945	0	0.000456867	-9.36177	-11.2254	-13.3229	-12.7271	-10.7297	-13.0252	-26.5754	-11.0959	0.341067	4	3	7	0.943129	-0.0844734	0.54268	0.54268
EH domain-containing protein 2	Ehd2	Q8BH64	0.000237916	0.000379994	0.000236745	0	0.000267897	0.000181884	0.000400091	0.000260815	-12.0372	-11.3617	-12.0443	-26.5754	-11.866	-12.4246	-11.2873	-11.9046	0.398266	3	4	7	Inf	Inf	0.54268	0.54268
Heat shock protein HSP 90-alpha	Hsp90aa1	P07901	8.537e-05	0.000333302	0.000311483	0.000256784	0	0.000313268	0.000334978	0.000865677	-13.5157	-11.5508	-11.6485	-11.9271	-26.5754	-11.6403	-11.5436	-10.1739	0.471702	4	3	7	1.34664	0.429361	0.598223	0.598223
Integrin-linked protein kinase	Ilk	O55222	0	0.000202001	9.43887e-05	0	0.000160213	0	0.000199392	0.000116983	-26.5754	-12.2733	-13.3709	-26.5754	-12.6076	-26.5754	-12.292	-13.0613	0.629729	2	3	5	Inf	Inf	0.741049	0.741049
Collagen alpha-2(IV) chain	Col4a2	P08122	0	4.62667e-05	0	0	4.89274e-05	0	0	4.76339e-05	-26.5754	-14.3994	-26.5754	-26.5754	-14.3187	-26.5754	-26.5754	-14.3573	0.635265	1	2	3	NA	NA	0.74468	0.74468
Platelet glycoprotein 4	Cd36	Q08857	0	0.000145784	9.08268e-05	0.000102956	0	0	0	0.000187615	-26.5754	-12.7438	-13.4264	-13.2455	-26.5754	-26.5754	-26.5754	-12.3799	0.203293	3	1	4	NA	NA	0.54268	0.54268
39S ribosomal protein L34, mitochondrial	Mrpl34	Q99N91	0.000989516	0.000468275	0.00043762	0.000496061	0.000495204	0.000605178	0.000369781	0.000542377	-9.98097	-11.0603	-11.158	-10.9772	-10.9797	-10.6903	-11.401	-10.8484	0.578344	4	4	8	0.932789	-0.100377	0.704205	0.704205
Talin-1	Tln1	P26039	0	0	0	5.05247e-05	0	0	1.50652e-05	0	-26.5754	-26.5754	-26.5754	-14.2724	-26.5754	-26.5754	-16.0175	-26.5754	0.931507	1	1	2	NA	NA	0.982773	0.982773
F-box only protein 40	Fbxo40	P62932	0	0.000128776	0	0	0.000170226	0	0	9.94358e-05	-26.5754	-12.9227	-26.5754	-26.5754	-12.5202	-26.5754	-26.5754	-13.2957	0.637205	1	2	3	NA	NA	0.745996	0.745996
Phosphatidylethanolamine-binding protein 1	Pebp1	P70296	0.000345545	0.000245287	0.000343844	0	0.000389089	0.000422664	0.000484237	0	-11.4988	-11.9932	-11.5059	-26.5754	-11.3276	-11.2082	-11.012	-26.5754	0.128729	3	3	6	NA	NA	0.542371	0.542371
Cullin-associated NEDD8-dissociated protein 2	Cand2	Q6ZQ73	0	5.68128e-05	8.84894e-05	0	6.00799e-05	0	8.97263e-05	7.31146e-05	-26.5754	-14.1032	-13.464	-26.5754	-14.0225	-26.5754	-13.4439	-13.7393	0.628834	2	3	5	Inf	Inf	0.740952	0.740952
Myosin-11	Myh11	O08638	0.00209382	0.00293858	0.000986091	0.00179084	0.00255565	0.00138809	0.000546527	0.00178722	-8.89964	-8.41066	-9.98598	-9.12514	-8.61209	-9.49268	-10.8374	-9.12806	0.298984	4	4	8	0.811286	-0.301718	0.54268	0.54268
Tropomodulin-3	Tmod3	Q9JHJ0	0	0.000193164	0	0	0.000340453	0	0	9.94358e-05	-26.5754	-12.3378	-26.5754	-26.5754	-11.5202	-26.5754	-26.5754	-13.2957	0.640395	1	2	3	NA	NA	0.746854	0.746854
ATP synthase subunit d, mitochondrial	Atp5pd	Q9DCX2	0.00611069	0.00515103	0.00570058	0.00588746	0.0055906	0.00595622	0.00685068	0.0054428	-7.35445	-7.60092	-7.45467	-7.40814	-7.48278	-7.39138	-7.18953	-7.52143	0.614629	4	4	8	1.04936	0.0695068	0.738023	0.738023
60S ribosomal protein L10-like	Rpl10l	P86048	0.000725645	0.00103021	0.000770211	0.000545667	0.00087156	0.000798835	0.000650815	0.00111368	-10.4284	-9.92284	-10.3424	-10.8397	-10.1641	-10.2898	-10.5854	-9.81043	0.627273	4	4	8	1.21561	0.281678	0.740439	0.740439
Tubulin alpha-1B chain	Tuba1b	P05213	0.00246719	0.000669634	0.000770211	0.0004911	0.00136181	0.00115387	0.00130163	0.00182962	-8.66291	-10.5443	-10.3424	-10.9917	-9.52025	-9.75929	-9.58545	-9.09423	0.337594	4	4	8	1.92266	0.943101	0.54268	0.54268
40S ribosomal protein S7	Rps7	P62082	0.000824597	0.00128776	0.00109405	0.00148818	0.000990409	0.00121036	0.00110934	0.000994358	-10.244	-9.60091	-9.83609	-9.39222	-9.97967	-9.69034	-9.81606	-9.97393	0.624322	4	4	8	0.955781	-0.0652475	0.740385	0.740385
Myosin regulatory light chain 2, ventricular/cardiac muscle isoform	Myl2	P51667	0.00362823	0.00271107	0.00228023	0.00244114	0.00286697	0.00303651	0.00214084	0.00198872	-8.10652	-8.52692	-8.7766	-8.67822	-8.44625	-8.36337	-8.8676	-8.97394	0.308387	4	4	8	0.915941	-0.126674	0.54268	0.54268
Plasminogen	Plg	P20918	7.97412e-05	0.000254721	0	0	0.00011972	0	0	4.37081e-05	-13.6141	-11.9387	-26.5754	-26.5754	-13.0279	-26.5754	-26.5754	-14.4814	0.93446	2	2	4	NA	NA	0.982773	0.982773
Kinectin	Ktn1	Q61595	7.11417e-05	0.000151501	9.43887e-05	0.000106993	0.00012461	5.80127e-05	0.000106342	7.79889e-05	-13.7787	-12.6883	-13.3709	-13.1901	-12.9702	-14.073	-13.1989	-13.6462	0.676846	4	4	8	0.997514	-0.00359168	0.773539	0.773539
ATP synthase subunit ATP5MPL, mitochondrial	Atp5mpl	P56379	0	0.00110379	0	0.00116929	0	0	0.00116217	0	-26.5754	-9.8233	-26.5754	-9.74014	-26.5754	-26.5754	-9.74895	-26.5754	0.638534	2	1	3	NA	NA	0.746594	0.746594
GTP-binding nuclear protein Ran	Ran	P62827	0.000604704	0.000536565	0.000401152	0.000341042	0.000567422	0.000277373	0.000423708	0.00107722	-10.6915	-10.8639	-11.2835	-11.5177	-10.7833	-11.8158	-11.2046	-9.85846	0.770608	4	4	8	1.41753	0.503384	0.859162	0.859162
Fatty acid-binding protein, heart	Fabp3	P11404	0.00120941	0.00188871	0.00320921	0.001637	0.00181575	0.00236692	0.00162704	0.000795487	-9.69147	-9.04838	-8.28356	-9.25472	-9.10521	-8.72277	-9.26353	-10.2959	0.562218	4	4	8	0.936869	-0.0940805	0.686403	0.686403
Fibrinogen beta chain	Fgb	Q8K0E8	0	0.000140483	0.000131286	0	0.000247602	0	0	0.000216951	-26.5754	-12.7972	-12.8949	-26.5754	-11.9796	-26.5754	-26.5754	-12.1703	0.965239	2	2	4	Inf	Inf	0.99904	0.99904
LIM and calponin homology domains-containing protein 1	Limch1	Q3UH68	9.2243e-05	0.000174611	0	6.93644e-05	0.000161571	9.40248e-05	5.17067e-05	0.000134828	-13.404	-12.4835	-26.5754	-13.8152	-12.5955	-13.3764	-14.239	-12.8565	0.356841	3	4	7	Inf	Inf	0.54268	0.54268
Myosin light polypeptide 6	Myl6	Q60605	0.0042685	0.00348452	0.00127425	0.00192588	0.00272362	0.0018274	0.00107672	0.00327553	-7.87205	-8.16482	-9.61613	-9.02026	-8.52025	-9.09598	-9.85913	-8.25405	0.528326	4	4	8	0.927072	-0.109247	0.652007	0.652007
E3 ubiquitin-protein ligase TRIM21	Trim21	Q62191	0.000134379	0.000381558	0.000267435	0.000151574	0.000151312	0.000287646	0.000188315	0.000147312	-12.8613	-11.3558	-11.8685	-12.6876	-12.6901	-11.7634	-12.3745	-12.7287	0.303291	4	4	8	0.888981	-0.169776	0.54268	0.54268
Glutathione S-transferase P 1	Gstp1	P19157	0.00105823	0.000536565	0.000601728	0.000454722	0.00102136	0.000554746	0.000932157	0.000580042	-9.88411	-10.8639	-10.6986	-11.1027	-9.93528	-10.8159	-10.0671	-10.7515	0.211547	4	4	8	1.20594	0.270161	0.54268	0.54268
Aspartate aminotransferase, mitochondrial	Got2	P05202	0.000849159	0.000986367	0.000921796	0.000812695	0.000927191	0.000755399	0.000908718	0.000846263	-10.2017	-9.98557	-10.0832	-10.265	-10.0748	-10.3705	-10.1039	-10.2066	0.662086	4	4	8	0.971212	-0.0421413	0.763848	0.763848
Serotransferrin	Tf	Q921I1	0	0.000133793	0.000187551	7.08658e-05	0.000141487	0.000115272	0.000132065	0.00010331	-26.5754	-12.8676	-12.3803	-13.7843	-12.7869	-13.0825	-12.8864	-13.2406	0.39896	3	4	7	Inf	Inf	0.54268	0.54268
2,4-dienoyl-CoA reductase, mitochondrial	Decr1	Q9CQ62	0.000302352	0.000286168	0.000534869	0.000378935	0.000302625	0.000678023	0.000508449	0.000276211	-11.6914	-11.7708	-10.8685	-11.3657	-11.6901	-10.5264	-10.9416	-11.8219	0.660596	4	4	8	1.26243	0.336208	0.763848	0.763848
CDGSH iron-sulfur domain-containing protein 1	Cisd1	Q91WS0	0.00332587	0.00257551	0.00200576	0.00227361	0.00317756	0.00332848	0.00288121	0.00182299	-8.23205	-8.60092	-8.96163	-8.78079	-8.29786	-8.23092	-8.4391	-9.09947	0.559249	4	4	8	1.12151	0.165441	0.683972	0.683972
ATP synthase subunit gamma, mitochondrial	Atp5f1c	Q91VR2	0.0073664	0.00593149	0.00539732	0.00529131	0.00602499	0.00558108	0.00603976	0.00512245	-7.08482	-7.39739	-7.53354	-7.56216	-7.37482	-7.48524	-7.37129	-7.60895	0.530193	4	4	8	0.961486	-0.0566623	0.653427	0.653427
Protein SET	Set	Q9EQU5	0.000549731	0.000390229	0.000291747	0.000413384	0.00041267	0.00033621	0.000246521	0.000482113	-10.829	-11.3234	-11.7429	-11.2402	-11.2427	-11.5383	-11.9859	-11.0183	0.316431	4	4	8	0.905872	-0.142621	0.54268	0.54268
Glyceraldehyde-3-phosphate dehydrogenase	Gapdh	P16858	0.00987684	0.00751192	0.0077556	0.00833657	0.00900309	0.00764317	0.0080222	0.0073472	-6.66173	-7.0566	-7.01054	-6.90633	-6.79536	-7.03161	-6.96178	-7.08859	0.368416	4	4	8	0.961176	-0.057127	0.54268	0.54268
NADH dehydrogenase [ubiquinone] 1 alpha subcomplex subunit 10, mitochondrial	Ndufa10	Q99LC3	0.00230083	0.00188452	0.0022895	0.00226252	0.00225861	0.00194838	0.00228182	0.00194021	-8.76363	-9.05158	-8.77075	-8.78785	-8.79034	-9.0035	-8.77559	-9.00956	0.448097	4	4	8	0.967432	-0.0477679	0.578845	0.578845
Translational activator of cytochrome c oxidase 1	Taco1	Q8K0Z7	0.000340146	0.000241454	0	0.000255781	0.00025534	0	0.000190668	0.000186442	-11.5215	-12.0159	-26.5754	-11.9327	-11.9352	-26.5754	-12.3566	-12.3889	0.962154	3	3	6	Inf	Inf	0.997141	0.997141
Peroxiredoxin-2	Prdx2	Q61171	0.00197903	0.00117069	0.00087524	0.00111614	0.00148561	0.00121036	0.000924453	0.000903962	-8.98098	-9.73842	-10.158	-9.80726	-9.39472	-9.69034	-10.0791	-10.1114	0.319645	4	4	8	0.912673	-0.13183	0.54268	0.54268
Actin-binding LIM protein 1	Ablim1	Q8K4G5	0	7.96551e-05	0	8.43814e-05	0.00019655	0	0	8.20089e-05	-26.5754	-13.6157	-26.5754	-13.5325	-12.3127	-26.5754	-26.5754	-13.5737	0.958324	2	2	4	NA	NA	0.996084	0.996084
Resistin-like gamma	Retnlg	Q8K426	0.000837283	0.000792466	0.000555441	0.000419744	0.000838038	0.000682765	0.000625784	0	-10.222	-10.3013	-10.8141	-11.2182	-10.2207	-10.5163	-10.642	-26.5754	0.389597	4	3	7	0.747279	-0.420282	0.54268	0.54268
Elongin-B	Elob	P62869	0.00223275	0.00217928	0.00203662	0.00104936	0.00188559	0.0018776	0.00156446	0.00152978	-8.80695	-8.84193	-8.9396	-9.89626	-9.05076	-9.05688	-9.32011	-9.35245	0.747186	4	4	8	0.983018	-0.0247103	0.838171	0.838171
60S ribosomal protein L22	Rpl22	P67984	0.000725645	0.000858505	0.000481382	0	0.000544725	0.000739662	0.000542346	0.000662906	-10.4284	-10.1859	-11.0205	-26.5754	-10.8422	-10.4008	-10.8485	-10.5589	0.407055	3	4	7	Inf	Inf	0.548168	0.548168
60S ribosomal protein L23	Rpl23	P62830	0.000967527	0.00137361	0.00112323	0.000909444	0.0007263	0.00147932	0.000813519	0.000928068	-10.0134	-9.5078	-9.79812	-10.1027	-10.4271	-9.40084	-10.2635	-10.0735	0.297791	4	4	8	0.893097	-0.163112	0.54268	0.54268
28S ribosomal protein S5, mitochondrial	Mrps5	Q99N87	0	0.00016097	0	0.000170521	0	0	8.47415e-05	0.000124295	-26.5754	-12.6008	-26.5754	-12.5177	-26.5754	-26.5754	-13.5264	-12.9738	0.954017	2	2	4	NA	NA	0.994358	0.994358
Dystrophin	Dmd	P11531	0	2.41832e-05	2.26001e-05	2.56182e-05	2.55739e-05	1.56267e-05	0	1.4005e-05	-26.5754	-15.335	-15.4327	-15.2519	-15.2544	-15.9647	-26.5754	-16.1227	0.947148	3	3	6	Inf	Inf	0.98946	0.98946
Enoyl-CoA hydratase, mitochondrial	Echs1	Q8BH95	0.0011704	0.000830811	0.000854065	0.00114414	0.00123002	0.000715802	0.000852883	0.00089813	-9.73878	-10.2332	-10.1933	-9.77151	-9.66709	-10.4481	-10.1953	-10.1208	0.290979	4	4	8	0.924029	-0.11399	0.54268	0.54268
Ig heavy chain V region AC38 205.12	NA	P06330	0.00362823	0.00950959	0.00610985	0.00419744	0.00209509	0.00785179	0.00500627	0.00474232	-8.10652	-6.7164	-7.35464	-7.89627	-8.89876	-6.99276	-7.64205	-7.72019	0.232713	4	4	8	0.838076	-0.254846	0.54268	0.54268
Dynactin subunit 1	Dctn1	O08788	7.66526e-05	0.000108825	0.0001017	0.000134495	9.59022e-05	9.37599e-05	7.16126e-05	0.000126045	-13.6711	-13.1656	-13.2632	-12.86	-13.3479	-13.3805	-13.7692	-12.9537	0.526723	4	4	8	0.938506	-0.0915626	0.65091	0.65091
40S ribosomal protein S11	Rps11	P62281	0.00201568	0.00200318	0.00213948	0.00121259	0.00181575	0.00147932	0.00158184	0.00198872	-8.95451	-8.96349	-8.86852	-9.68768	-9.10521	-9.40084	-9.30417	-8.97394	0.794415	4	4	8	1.00468	0.00673365	0.88159	0.88159
Creatine kinase S-type, mitochondrial	Ckmt2	Q6P8J7	0.00478617	0.00345228	0.00348234	0.00359908	0.0052734	0.00344651	0.00419741	0.00351199	-7.70691	-8.17823	-8.16572	-8.11815	-7.56705	-8.18064	-7.89628	-8.15349	0.276817	4	4	8	1.07032	0.0980392	0.54268	0.54268
Nidogen-1	Nid1	P10493	7.94502e-05	0.000244392	8.78435e-05	5.97445e-05	0.000337968	0.000113379	5.93809e-05	0.000116129	-13.6194	-11.9985	-13.4745	-14.0306	-11.5308	-13.1064	-14.0394	-13.0719	0.669028	4	4	8	1.83438	0.87529	0.768456	0.768456
ATPase family AAA domain-containing protein 1	Atad1	Q9D5T0	0	0.000188452	0.000176115	0.000266179	0.00019929	0.000162365	0.000248024	0.000145516	-26.5754	-12.3734	-12.4711	-11.8753	-12.2928	-12.5884	-11.9772	-12.7464	0.415389	3	4	7	Inf	Inf	0.552216	0.552216
Immunoglobulin J chain	Jchain	P01592	0	0	0.000267435	0.000303148	0	0	0	0.000331453	-26.5754	-26.5754	-11.8685	-11.6876	-26.5754	-26.5754	-26.5754	-11.5589	0.395858	2	1	3	NA	NA	0.54268	0.54268
Striated muscle-specific serine/threonine-protein kinase	Speg	Q62407	0	0	0	2.31215e-05	0	0	2.29808e-05	1.68535e-05	-26.5754	-26.5754	-26.5754	-15.3998	-26.5754	-26.5754	-15.4086	-15.8557	0.41411	1	2	3	NA	NA	0.552147	0.552147
60S ribosomal protein L21	Rpl21	O09167	0	0.00040666	0.000253359	0.000430789	0.000430046	0.000350366	0.000321126	0.000209339	-26.5754	-11.2639	-11.9465	-11.1807	-11.1832	-11.4788	-11.6045	-12.2218	0.425446	3	4	7	Inf	Inf	0.559088	0.559088
40S ribosomal protein S23	Rps23	P62267	0.000680292	0.0016097	0.00075216	0.00102313	0.00102136	0.00110949	0.0010169	0.00136724	-10.5215	-9.27899	-10.3767	-9.93279	-9.93528	-9.81587	-9.94159	-9.5145	0.444489	4	4	8	1.21973	0.286562	0.576634	0.576634
Succinyl-CoA:3-ketoacid coenzyme A transferase 1, mitochondrial	Oxct1	Q9D0K2	0.000129579	0.000413922	0.000171922	0.000194881	0.000194545	0.000277373	0.00032686	0.00024859	-12.9138	-11.2383	-12.5059	-12.325	-12.3275	-11.8158	-11.579	-11.9739	0.391647	4	4	8	1.33707	0.419072	0.54268	0.54268
Spectrin beta chain, non-erythrocytic 1	Sptbn1	Q62261	0.000794502	0.00109036	0.00040408	0.000806551	0.00122265	0.000421121	0.000319172	0.00064597	-10.2976	-9.84096	-11.273	-10.2759	-9.67576	-11.2134	-11.6133	-10.5962	0.450135	4	4	8	0.878972	-0.186111	0.580655	0.580655
Actin, alpha cardiac muscle 1	Actc1	P68033	0.0127852	0.0119577	0.00630381	0.00889956	0.0116727	0.00850611	0.00697302	0.00932803	-6.28938	-6.38591	-7.30956	-6.81205	-6.42072	-6.87728	-7.164	-6.74421	0.52372	4	4	8	0.944659	-0.0821347	0.648958	0.648958
Myosin-14	Myh14	Q6URW6	3.16876e-05	0.000269923	0.000178679	0	0.000249765	0.000193798	0	0.00019974	-14.9453	-11.8551	-12.4503	-26.5754	-11.9671	-12.3331	-26.5754	-12.2895	0.916673	3	3	6	Inf	Inf	0.972943	0.972943
Polyadenylate-binding protein 2	Pabpn1	Q8CCS6	0.00056691	0.000321939	0.000300864	0.000511563	0.000595793	0.00020803	0.000381337	0.000310737	-10.7846	-11.6009	-11.6986	-10.9328	-10.7129	-12.2309	-11.3566	-11.652	0.436207	4	4	8	0.893006	-0.163258	0.569129	0.569129
Laminin subunit beta-2	Lamb2	Q61292	0.000147339	0.000183031	2.44356e-05	6.9247e-05	0.000235033	0	0	6.05701e-05	-12.7285	-12.4155	-15.3201	-13.8177	-12.0548	-26.5754	-26.5754	-14.0108	0.198443	4	2	6	0.617471	-0.695557	0.54268	0.54268
60S ribosomal protein L4	Rpl4	Q9D8E6	0	0	0.000153633	0	0	0	0.000129817	0.000126939	-26.5754	-26.5754	-12.6681	-26.5754	-26.5754	-26.5754	-12.9111	-12.9435	0.400945	1	2	3	NA	NA	0.543331	0.543331
GMP reductase 1	Gmpr	Q9DCZ1	0.000686421	0.000417651	0.000325258	0.000516171	0.000662503	0.000479781	0.000549675	0.000429993	-10.5086	-11.2254	-11.5861	-10.9198	-10.5598	-11.0253	-10.8291	-11.1834	0.518642	4	4	8	1.15923	0.213168	0.644071	0.644071
Ig heavy chain V region 1-72	Ighv1-72	P06328	0.000837283	0.00217928	0.000740588	0.000839487	0.000838038	0.00119484	0.000625784	0.00122383	-10.222	-8.84193	-10.399	-10.2182	-10.2207	-9.70896	-10.642	-9.67437	0.662264	4	4	8	0.962995	-0.0543993	0.763848	0.763848
Ubiquitin-like modifier-activating enzyme 1	Uba1	Q02053	6.14953e-05	0.000196438	0.000285566	0.000208093	0.000253897	0.000131635	0.000189591	0.00028651	-13.9889	-12.3136	-11.7738	-12.2304	-11.9434	-12.8911	-12.3647	-11.7691	0.627566	4	4	8	1.7099	0.773908	0.740439	0.740439
Ig kappa chain V-IV region S107B	NA	P01680	0	0.000551896	0	0	0	0.000475497	0.000435814	0	-26.5754	-10.8233	-26.5754	-26.5754	-26.5754	-11.0382	-11.164	-26.5754	0.398763	1	2	3	NA	NA	0.54268	0.54268
Low molecular weight phosphotyrosine protein phosphatase	Acp1	Q9D358	0	0.000286168	0	0	0	0.000246554	0.000225977	0	-26.5754	-11.7708	-26.5754	-26.5754	-26.5754	-11.9858	-12.1115	-26.5754	0.399276	1	2	3	NA	NA	0.54268	0.54268
Proteasome subunit beta type-5	Psmb5	O55234	0	0.000177622	0	0	0	0.000153033	0.000140262	0	-26.5754	-12.4588	-26.5754	-26.5754	-26.5754	-12.6738	-12.7995	-26.5754	0.399693	1	2	3	NA	NA	0.54268	0.54268
Peroxiredoxin-1	Prdx1	P35700	0.00247379	0.00128776	0.00175048	0.00124015	0.00210462	0.00151294	0.00110934	0.00135594	-8.65906	-9.60091	-9.15802	-9.65526	-8.89222	-9.36842	-9.81606	-9.52648	0.558039	4	4	8	0.938185	-0.0920555	0.683972	0.683972
Tropomyosin alpha-3 chain	Tpm3	P21107	0.00087957	0	0	0	0	0	0	0.000421849	-10.1509	-26.5754	-26.5754	-26.5754	-26.5754	-26.5754	-26.5754	-11.211	0.969997	1	1	2	NA	NA	0.99904	0.99904
2-oxoisovalerate dehydrogenase subunit beta, mitochondrial	Bckdhb	Q6P3A8	0.000168755	0.000179687	0	0.000190349	0.00019002	0.000154813	0.000141893	0.000138748	-12.5327	-12.4421	-26.5754	-12.359	-12.3615	-12.6571	-12.7828	-12.8151	0.411503	3	4	7	Inf	Inf	0.551088	0.551088
Fibronectin	Fn1	P11276	0.000225933	0.000566047	0.000220413	0.000379768	0.000548715	0.000203204	0.000134096	0.000284102	-12.1118	-10.7868	-12.1474	-11.3626	-10.8316	-12.2647	-12.8643	-11.7813	0.607041	4	4	8	1.03603	0.0510688	0.730371	0.730371
von Willebrand factor	Vwf	Q8CIZ8	0	3.334e-05	0	0	3.52573e-05	0	0	1.93079e-05	-26.5754	-14.872	-26.5754	-26.5754	-14.7913	-26.5754	-26.5754	-15.6597	0.652308	1	2	3	NA	NA	0.75784	0.75784
UTP--glucose-1-phosphate uridylyltransferase	Ugp2	Q91ZJ5	0.000381918	0	0.000253359	0.000191462	0.000477829	0.000155718	0.000178403	0.000209339	-11.3544	-26.5754	-11.9465	-12.3506	-11.0312	-12.6487	-12.4525	-12.2218	0.393676	3	4	7	Inf	Inf	0.54268	0.54268
Peroxiredoxin-6	Prdx6	O08709	0.00217694	0.000824164	0.00192553	0.001637	0.00261468	0.000887594	0.00130163	0.000875035	-8.84348	-10.2448	-9.02052	-9.25472	-8.57915	-10.1378	-9.58545	-10.1584	0.393963	4	4	8	0.872142	-0.197366	0.54268	0.54268
Barrier-to-autointegration factor	Banf1	O54962	0.00181411	0.00206041	0.000962764	0.00136417	0.00245126	0.00133139	0.000610139	0.000994358	-9.10651	-8.92285	-10.0205	-9.51775	-8.67225	-9.55284	-10.6786	-9.97393	0.293559	4	4	8	0.840011	-0.25152	0.54268	0.54268
60S ribosomal protein L7a	Rpl7a	P12970	0	0.00103021	0.000962764	0.000909444	0.000453937	0.000443797	0.000881312	0.000662906	-26.5754	-9.92284	-10.0205	-10.1027	-11.1052	-11.1378	-10.148	-10.5589	0.458066	3	4	7	Inf	Inf	0.585914	0.585914
Thioredoxin	Txn	P10639	0.000907056	0.000858505	0.00100288	0.000454722	0.00158878	0.000924577	0.000677932	0.000497179	-10.1065	-10.1859	-9.96162	-11.1027	-9.29786	-10.0789	-10.5265	-10.9739	0.697873	4	4	8	1.14947	0.200974	0.790634	0.790634
Electron transfer flavoprotein subunit beta	Etfb	Q9DCW4	0.00323949	0.00248353	0.00249287	0.0031181	0.00262635	0.00324923	0.00341387	0.00255692	-8.27001	-8.65339	-8.64797	-8.32511	-8.57272	-8.26568	-8.19437	-8.61137	0.780372	4	4	8	1.07713	0.107193	0.868985	0.868985
Acyl-protein thioesterase 1	Lypla1	P97823	0.000290258	0.000206041	0	0	0.000326835	0.000177519	0.000162704	0	-11.7503	-12.2447	-26.5754	-26.5754	-11.5791	-12.4597	-12.5854	-26.5754	0.392833	2	3	5	NA	NA	0.54268	0.54268
Carbonyl reductase family member 4	Cbr4	Q91VT4	0.00145129	0.000515103	0.000866488	0.00109133	0.00119839	0.000887594	0.000813519	0.000636389	-9.42844	-10.9228	-10.1725	-9.83968	-9.70467	-10.1378	-10.2635	-10.6178	0.800141	4	4	8	1.01772	0.0253418	0.886578	0.886578
Myosin-9	Myh9	Q8VDD5	0.00285763	0.00385187	0.00140581	0.00277662	0.00384441	0.00193425	0.0010259	0.00276308	-8.45096	-8.02022	-9.47438	-8.49245	-8.02302	-9.014	-9.92888	-8.4995	0.461037	4	4	8	0.893088	-0.163125	0.587243	0.587243
L-lactate dehydrogenase A chain	Ldha	P06151	0.00110862	0.000786963	0.000334293	0.000606296	0.000756562	0.000554746	0.000734427	0.000497179	-9.817	-10.3114	-11.5466	-10.6877	-10.3682	-10.8159	-10.4111	-10.9739	0.905465	4	4	8	1.10108	0.138924	0.965066	0.965066
Ubiquitin-conjugating enzyme E2 variant 2	Ube2v2	Q9D2M8	0	0.000321939	0	0	0	0	0.000254225	0.00024859	-26.5754	-11.6009	-26.5754	-26.5754	-26.5754	-26.5754	-11.9416	-11.9739	0.649019	1	2	3	NA	NA	0.754981	0.754981
ATP synthase subunit O, mitochondrial	Atp5po	Q9DB20	0.00899169	0.00828644	0.00795327	0.0115064	0.00971031	0.0090689	0.00981528	0.00951125	-6.79719	-6.91503	-6.97423	-6.44141	-6.68627	-6.78486	-6.67075	-6.71615	0.618841	4	4	8	1.05877	0.0823851	0.739689	0.739689
Transcriptional activator protein Pur-alpha	Pura	P42669	0.000310991	0.000294344	0.000275076	0.000389762	0.000311271	0.000380397	0.000290542	0.000340923	-11.6508	-11.7302	-11.8278	-11.3251	-11.6495	-11.3602	-11.7489	-11.5182	0.620683	4	4	8	1.05604	0.0786712	0.740385	0.740385
Heat shock protein beta-6	Hspb6	Q5EBG6	0.00100784	0.000715421	0.000802304	0.00075787	0.0012105	0.000862939	0.000564944	0.000883874	-9.9545	-10.4489	-10.2835	-10.3657	-9.69017	-10.1784	-10.7896	-10.1439	0.763085	4	4	8	1.06942	0.0968327	0.85286	0.85286
60S ribosomal protein L36	Rpl36	P47964	0	0	0	0.000454722	0	0.000369831	0	0.000331453	-26.5754	-26.5754	-26.5754	-11.1027	-26.5754	-11.4008	-26.5754	-11.5589	0.407902	1	2	3	NA	NA	0.548168	0.548168
F-actin-capping protein subunit alpha-2	Capza2	P47754	0.000219892	0.000390229	0.000145873	0	0.000330136	0.000134484	0	0.000120528	-12.1508	-11.3234	-12.7429	-26.5754	-11.5646	-12.8602	-26.5754	-13.0182	0.959857	3	3	6	Inf	Inf	0.996084	0.996084
40S ribosomal protein S16	Rps16	P14131	0.00181411	0.00241454	0.00165475	0.00102313	0.00170226	0.00166424	0.0020338	0.00198872	-9.10651	-8.69403	-9.23916	-9.93279	-9.19832	-9.23091	-8.9416	-8.97394	0.654588	4	4	8	1.20011	0.263165	0.759522	0.759522
Destrin	Dstn	Q9R0P5	0.000954796	0.000677767	0.00101344	0.000574386	0.000860092	0.000583943	0.000963377	0.00104669	-10.0325	-10.5269	-9.94651	-10.7657	-10.1832	-10.7419	-10.0196	-9.89993	0.70328	4	4	8	1.13382	0.181188	0.795771	0.795771
Nucleoside diphosphate kinase B	Nme2	Q01768	0.00298795	0.00257551	0.001699	0.0016049	0.00208277	0.00208846	0.00227307	0.00187173	-8.38662	-8.60092	-9.20109	-9.28329	-8.90727	-8.90334	-8.78114	-9.0614	0.84991	4	4	8	1.00302	0.00435571	0.923859	0.923859
Isoaspartyl peptidase/L-asparaginase	Asrgl1	Q8C0M9	0	0	0.000212374	0	0	0	0	0.000116983	-26.5754	-26.5754	-12.201	-26.5754	-26.5754	-26.5754	-26.5754	-13.0613	0.972244	1	1	2	NA	NA	0.99904	0.99904
Spectrin beta chain, erythrocytic	Sptb	P15508	0.00119954	0.00138762	0.000530503	0.00111361	0.00170088	0.00049814	0.000423362	0.00106335	-9.7033	-9.49316	-10.8803	-9.81053	-9.1995	-10.9711	-11.2058	-9.87715	0.472285	4	4	8	0.882462	-0.180395	0.598223	0.598223
Collagen alpha-2(VI) chain	Col6a2	Q02788	0.000296855	0.00037462	0.000131286	0.000223227	0.000420924	0.000181553	0.000147912	0.000144634	-11.7179	-11.3822	-12.8949	-12.1291	-11.2141	-12.4272	-12.7229	-12.7552	0.534777	4	4	8	0.919286	-0.121415	0.658187	0.658187
39S ribosomal protein L14, mitochondrial	Mrpl14	Q9D1I6	0.000680292	0.000643878	0.00075216	0.000852604	0.000851132	0.000970806	0.000635562	0.000621474	-10.5215	-10.6009	-10.3767	-10.1958	-10.1983	-10.0085	-10.6197	-10.652	0.838344	4	4	8	1.08319	0.11529	0.916478	0.916478
Tripartite motif-containing protein 72	Trim72	Q1XH17	0.00116377	0.000534541	0.000499548	0.000566258	0.00102778	0.000544279	0.000767471	0.000712936	-9.74697	-10.8694	-10.9671	-10.7862	-9.92624	-10.8433	-10.3476	-10.4539	0.336813	4	4	8	1.17418	0.231657	0.54268	0.54268
Filamin-C	Flnc	Q8VHX6	0.000149618	0.000141609	0.000148881	0.00019689	0.000308865	0.000205885	0.000111824	8.8843e-05	-12.7063	-12.7857	-12.7135	-12.3102	-11.6607	-12.2458	-13.1264	-13.4582	0.990735	4	4	8	1.18015	0.238966	0.999825	0.999825
Cytoplasmic aconitate hydratase	Aco1	P28271	0	0	0.000147362	0	8.33762e-05	0	0	0	-26.5754	-26.5754	-12.7283	-26.5754	-13.5498	-26.5754	-26.5754	-26.5754	0.97249	1	1	2	NA	NA	0.99904	0.99904
Cytochrome c oxidase subunit 6B1	Cox6b1	P56391	0.00181411	0.00206041	0.00216622	0.00109133	0.00190654	0.00288468	0.0020338	0.000994358	-9.10651	-8.92285	-8.8506	-9.83968	-9.03482	-8.43737	-8.9416	-9.97393	0.598313	4	4	8	1.07525	0.104675	0.721774	0.721774
Fibrillin-1	Fbn1	Q61554	0.000127918	0.00030543	3.85723e-05	0.000201127	0.000279346	8.53456e-05	0	0.000184849	-12.9324	-11.6768	-14.6617	-12.2795	-11.8056	-13.5162	-26.5754	-12.4013	0.362123	4	3	7	0.84557	-0.242005	0.54268	0.54268
Ig heavy chain V region 345	NA	P18526	0	0.000792466	0.000925735	0.000839487	0.000838038	0.000512074	0.00078223	0	-26.5754	-10.3013	-10.0771	-10.2182	-10.2207	-10.9313	-10.3201	-26.5754	0.975916	3	3	6	Inf	Inf	0.999761	0.999761
Ig kappa chain V-II region 7S34.1	NA	P01630	0.000604704	0.000643878	0.000401152	0.000682083	0.000453937	0.000739662	0.000508449	0.000497179	-10.6915	-10.6009	-11.2835	-10.5177	-11.1052	-10.4008	-10.9416	-10.9739	0.717348	4	4	8	0.973956	-0.0380721	0.810683	0.810683
Macrophage migration inhibitory factor	Mif	P34884	0	0	0	0.000419744	0	0	0.000312892	0.000305956	-26.5754	-26.5754	-26.5754	-11.2182	-26.5754	-26.5754	-11.642	-11.6743	0.40818	1	2	3	NA	NA	0.548168	0.548168
Serine/threonine-protein phosphatase 2A catalytic subunit alpha isoform	Ppp2ca	P63330	0.000403136	0.000214626	0	0	0.000302625	0.000184915	0.000169483	0.000110484	-11.2764	-12.1858	-26.5754	-26.5754	-11.6901	-12.4008	-12.5265	-13.1437	0.196761	2	4	6	Inf	Inf	0.54268	0.54268
Transthyretin	Ttr	P07309	0.000680292	0.000643878	0.000451296	0.000511563	0.000510679	0.000554746	0.000635562	0.000497179	-10.5215	-10.6009	-11.1136	-10.9328	-10.9353	-10.8159	-10.6197	-10.9739	0.835915	4	4	8	0.998108	-0.00273157	0.916292	0.916292
C-1-tetrahydrofolate synthase, cytoplasmic	Mthfd1	Q922D8	0	0	4.76616e-05	0	8.08997e-05	0	0	0	-26.5754	-26.5754	-14.3565	-26.5754	-13.5933	-26.5754	-26.5754	-26.5754	0.97275	1	1	2	NA	NA	0.99904	0.99904
40S ribosomal protein S20	Rps20	P60867	0.00279094	0.00217928	0.00129603	0.00125923	0.00167608	0.00238968	0.0020338	0.00198872	-8.48503	-8.84193	-9.59168	-9.63323	-9.22069	-8.70896	-8.9416	-8.97394	0.627587	4	4	8	1.21141	0.27669	0.740439	0.740439
Histone H2B type 1-H	H2bc9	Q64478	0.00336907	0.00165569	0.00137538	0.00155905	0.00136181	0.00285298	0.000871627	0.00198872	-8.21343	-9.23835	-9.50595	-9.32511	-9.52025	-8.45331	-10.164	-8.97394	0.692285	4	4	8	1.00917	0.0131707	0.786256	0.786256
Phosphoglycerate kinase 1	Pgk1	P09411	0.000967527	0	0	0	0	0.000246554	0.000135586	0.00106065	-10.0134	-26.5754	-26.5754	-26.5754	-26.5754	-11.9858	-12.8484	-9.88082	0.435148	1	3	4	Inf	Inf	0.56856	0.56856
Aflatoxin B1 aldehyde reductase member 2	Akr7a2	Q8CG76	0.000619453	0.000439722	0.000352231	0.000332724	0.000597869	0.000487094	0.000496048	0.000291032	-10.6567	-11.1511	-11.4712	-11.5533	-10.7079	-11.0035	-10.9772	-11.7465	0.552637	4	4	8	1.08897	0.122967	0.678338	0.678338
NADH dehydrogenase [ubiquinone] 1 alpha subcomplex subunit 8	Ndufa8	Q9DCJ5	0.00235835	0.00321939	0.00276795	0.00204625	0.0021789	0.00277373	0.00223718	0.0027842	-8.728	-8.27899	-8.49696	-8.93279	-8.84218	-8.49395	-8.8041	-8.48851	0.794591	4	4	8	0.98859	-0.0165557	0.88159	0.88159
Ig kappa chain V-III region PC 7043	NA	P01665	0	0.00171701	0.00100288	0.00250097	0	0.00129441	0.0010169	0.00198872	-26.5754	-9.18588	-9.96162	-8.64329	-26.5754	-9.59348	-9.94159	-8.97394	0.203086	3	3	6	NA	NA	0.54268	0.54268
Prohibitin-2	Phb2	O35129	0.000659677	0.000780459	0.000364683	0.000578737	0.00082534	0.000403452	0.000554672	0.000421849	-10.5659	-10.3234	-11.421	-10.7548	-10.2427	-11.2753	-10.8161	-11.211	0.758794	4	4	8	1.00449	0.00645965	0.850147	0.850147
40S ribosomal protein S25	Rps25	P62852	0.00129579	0.000735861	0.00103153	0.000974405	0.00116727	0.000792495	0.000726356	0.00113641	-9.59194	-10.4083	-9.92098	-10.0032	-9.74264	-10.3013	-10.427	-9.78129	0.64652	4	4	8	0.962047	-0.0558214	0.753035	0.753035
Transcription elongation factor, mitochondrial	Tefm	Q5SSK3	0.000172773	0	0	0	0	0.000105666	0	0	-12.4988	-26.5754	-26.5754	-26.5754	-26.5754	-13.2081	-26.5754	-26.5754	0.97674	1	1	2	NA	NA	0.999761	0.999761
Titin	Ttn	A2ASS6	6.5022e-06	9.89061e-06	4.31346e-06	7.68348e-06	1.74323e-05	4.54477e-06	4.68617e-06	6.10973e-06	-17.2284	-16.6241	-17.8194	-16.9879	-15.807	-17.7442	-17.7001	-17.3181	0.968796	4	4	8	1.25552	0.328283	0.99904	0.99904
Carnitine O-acetyltransferase	Crat	P47934	0.000153305	0.000435298	0.000542402	0.000345845	0.000345248	0.00028128	0.00040103	0.000336121	-12.6712	-11.1657	-10.8483	-11.4975	-11.5	-11.7957	-11.284	-11.5387	0.970715	4	4	8	1.15236	0.204595	0.99904	0.99904
Parkinson disease protein 7 homolog	Park7	Q99LX0	0.000907056	0.00115898	0.000962764	0.00109133	0.00136181	0.000998543	0.000915209	0.000994358	-10.1065	-9.75291	-10.0205	-9.83968	-9.52025	-9.96787	-10.0936	-9.97393	0.838067	4	4	8	1.05617	0.0788382	0.916478	0.916478
Complex I assembly factor ACAD9, mitochondrial	Acad9	Q8JZN5	0	7.46526e-05	0.000104648	7.90821e-05	7.89456e-05	6.43184e-05	5.89506e-05	8.6466e-05	-26.5754	-13.7093	-13.222	-13.6261	-13.6286	-13.9242	-14.0499	-13.4973	0.431535	3	4	7	Inf	Inf	0.564648	0.564648
Collagen alpha-1(VI) chain	Col6a1	Q04857	0.000403136	0.000500794	0.000245148	0.000404198	0.000706125	0.000226008	0.00013182	0.000313039	-11.2764	-10.9635	-11.994	-11.2726	-10.4678	-12.1113	-12.889	-11.6413	0.424459	4	4	8	0.878766	-0.18645	0.558595	0.558595
Citramalyl-CoA lyase, mitochondrial	Clybl	Q8R4N0	0.000477398	0.000271107	0.000253359	0.000287193	0.000286697	0.000291972	0.000374647	0.000261673	-11.0325	-11.8488	-11.9465	-11.7656	-11.7681	-11.7418	-11.3821	-11.8999	0.866162	4	4	8	1.01684	0.0240938	0.938171	0.938171
60S ribosomal protein L13	Rpl13	P47963	0.000302352	0.000214626	0.00050144	0.000454722	0.000453937	0.000277373	0.000423708	0.000414316	-11.6914	-12.1858	-10.9616	-11.1027	-11.1052	-11.8158	-11.2046	-11.2369	0.51907	4	4	8	1.13746	0.185813	0.644071	0.644071
Hexokinase-1	Hk1	P17710	0.000470325	0.000214626	0.000423438	0.000277886	0.0004035	0.0002671	0.000414292	0.000386695	-11.054	-12.1858	-11.2055	-11.8132	-11.2751	-11.8703	-11.237	-11.3365	0.458831	4	4	8	1.11809	0.161039	0.58607	0.58607
Sorbin and SH3 domain-containing protein 2	Sorbs2	Q3UTJ2	0	0.00013658	7.29367e-05	8.26768e-05	0.000165068	8.40525e-05	4.62227e-05	4.51981e-05	-26.5754	-12.8379	-13.7428	-13.562	-12.5646	-13.5382	-14.4007	-14.4331	0.482963	3	4	7	Inf	Inf	0.606697	0.606697
60S ribosomal protein L24	Rpl24	Q8BP67	0.000403136	0.000286168	0.000534869	0.000303148	0.000302625	0.000493108	0.000564944	0	-11.2764	-11.7708	-10.8685	-11.6876	-11.6901	-10.9858	-10.7896	-26.5754	0.408722	4	3	7	0.882511	-0.180314	0.548168	0.548168
40S ribosomal protein S26	Rps26	P62855	0.000837283	0.000792466	0.000740588	0.000629615	0.000838038	0.000853456	0.000625784	0.000764891	-10.222	-10.3013	-10.399	-10.6332	-10.2207	-10.1944	-10.642	-10.3524	0.760845	4	4	8	1.03443	0.0488294	0.8514	0.8514
40S ribosomal protein S17	Rps17	P63276	0	0.000643878	0.00075216	0.000852604	0	0.000832119	0.000889786	0.000870064	-26.5754	-10.6009	-10.3767	-10.1958	-26.5754	-10.2309	-10.1342	-10.1666	0.16691	3	3	6	NA	NA	0.542371	0.542371
UDP-glucose:glycoprotein glucosyltransferase 1	Uggt1	Q6P5E4	0	0	2.73513e-05	4.65057e-05	0	3.78236e-05	5.77783e-05	0	-26.5754	-26.5754	-15.1575	-14.3919	-26.5754	-14.69	-14.0789	-26.5754	0.970865	2	2	4	NA	NA	0.99904	0.99904
ATP-binding cassette sub-family F member 1	Abcf1	Q6P542	0	0	7.60077e-05	8.61579e-05	0	4.67155e-05	4.28168e-05	4.18677e-05	-26.5754	-26.5754	-13.6833	-13.5025	-26.5754	-14.3854	-14.5111	-14.5435	0.480424	2	3	5	NA	NA	0.60458	0.60458
Fumarylacetoacetate hydrolase domain-containing protein 2A	Fahd2	Q3TC72	0	0.000220758	0	0	0	0.000190199	0.000116217	0	-26.5754	-12.1452	-26.5754	-26.5754	-26.5754	-12.3601	-13.0708	-26.5754	0.39987	1	2	3	NA	NA	0.54268	0.54268
Basement membrane-specific heparan sulfate proteoglycan core protein	Hspg2	Q05793	0.000109394	0.000187663	0.000108855	0.000157668	0.000246358	8.36301e-05	8.68707e-05	9.49387e-05	-13.1581	-12.3795	-13.1652	-12.6307	-11.9869	-13.5454	-13.4906	-13.3625	0.640361	4	4	8	1.02446	0.0348683	0.746854	0.746854
Histone H3.3C	H3-5	P02301	0.0026607	0.00103021	0.000481382	0.00109133	0.00127102	0.00103553	0.00108469	0.00132581	-8.55397	-9.92284	-11.0205	-9.83968	-9.61978	-9.91541	-9.84849	-9.5589	0.844322	4	4	8	1.23775	0.307722	0.91888	0.91888
Pyruvate dehydrogenase protein X component, mitochondrial	Pdhx	Q8BKZ9	0.000470325	0.000238474	0.000445724	0.000454722	0.000353062	0.000328739	0.000451955	0.000405109	-11.054	-12.0338	-11.1315	-11.1027	-11.4677	-11.5707	-11.1115	-11.2694	0.903822	4	4	8	1.00852	0.0122326	0.965066	0.965066
60S ribosomal protein L27	Rpl27	P61358	0.00158735	0.00177067	0.00105302	0.00102313	0.00119159	0.00110949	0.00152535	0.00136724	-9.29916	-9.14148	-9.89123	-9.93279	-9.71289	-9.81587	-9.35664	-9.5145	0.917468	4	4	8	1.04054	0.0573302	0.972943	0.972943
60S ribosomal protein L9	Rpl9	P51410	0.000329839	0	0.00021881	0.000496061	0.000247602	0.000201726	0.000277336	0.000451981	-11.5659	-26.5754	-12.158	-10.9772	-11.9796	-12.2752	-11.816	-11.1114	0.399373	3	4	7	Inf	Inf	0.54268	0.54268
Ubiquitin-40S ribosomal protein S27a	Rps27a	P62983	0.00423293	0.00257551	0.00320921	0.00227361	0.00438806	0.00209571	0.00282472	0.00220969	-7.88412	-8.60092	-8.28356	-8.78079	-7.8322	-8.89834	-8.46767	-8.82194	0.224363	4	4	8	0.925607	-0.111529	0.54268	0.54268
Ig heavy chain V region MOPC 47A	NA	P01786	0	0.000594349	0	0.000419744	0.000419019	0.000341382	0	0.000458935	-26.5754	-10.7164	-26.5754	-11.2182	-11.2207	-11.5163	-26.5754	-11.0894	0.416015	2	3	5	NA	NA	0.552216	0.552216
Nucleolin	Ncl	P09405	9.42396e-05	0.000100345	0.000281327	0.000141732	0.000282974	0	0.000211304	0.00020662	-13.3732	-13.2826	-11.7954	-12.7844	-11.787	-26.5754	-12.2083	-12.2407	0.467828	4	3	7	1.30291	0.381734	0.595062	0.595062
Heterogeneous nuclear ribonucleoprotein Q	Syncrip	Q7TMK9	0	0	0.000103153	7.79524e-05	0	0	8.71627e-05	0.000142051	-26.5754	-26.5754	-13.2428	-13.6469	-26.5754	-26.5754	-13.4858	-12.7812	0.568087	2	2	4	NA	NA	0.692641	0.692641
Complement C4-B	C4b	P01029	0	9.34124e-05	0.000112239	0.000113092	2.82241e-05	8.04813e-05	0.000105378	0.000144259	-26.5754	-13.3859	-13.121	-13.1101	-15.1122	-13.6008	-13.212	-12.7589	0.389203	3	4	7	Inf	Inf	0.54268	0.54268
Ig kappa chain V-V region K2 (Fragment)	NA	P01635	0.000837283	0.00277363	0.00203662	0.0014691	0.00125706	0.00238968	0.00156446	0.0013768	-10.222	-8.494	-8.9396	-9.41084	-9.63572	-8.70896	-9.32011	-9.50445	0.911278	4	4	8	1.01707	0.0244126	0.968631	0.968631
Laminin subunit gamma-1	Lamc1	P02468	0.000184486	0.000189162	4.07951e-05	0.0001079	0.000338529	0	0	8.98855e-05	-12.4041	-12.368	-14.5809	-13.1779	-11.5284	-26.5754	-26.5754	-13.4414	0.199764	4	2	6	0.667008	-0.584225	0.54268	0.54268
Selenium-binding protein 2	Selenbp2	Q63836	0.0004792	0.000194378	0.00013624	0.000154434	0.000256946	0.000125603	0.000230241	0.000262661	-11.0271	-12.3288	-12.8415	-12.6606	-11.9262	-12.9587	-12.0845	-11.8945	0.997527	4	4	8	1.14328	0.193184	0.999825	0.999825
Ig kappa chain V-VI region TEPC 601/TEPC 191	NA	P01677	0.00241882	0.00107313	0.00180518	0.00136417	0.00181575	0.00147932	0.00186431	0.00116008	-8.69148	-9.86394	-9.11363	-9.51775	-9.10521	-9.40084	-9.06713	-9.75154	0.868243	4	4	8	1.00309	0.00444475	0.939309	0.939309
Cytochrome b-c1 complex subunit 8	Uqcrq	Q9CQ69	0.00725645	0.00540858	0.0055359	0.00600233	0.00708142	0.00665696	0.00589801	0.00517066	-7.10652	-7.53053	-7.49697	-7.38026	-7.14174	-7.23092	-7.40555	-7.59543	0.766766	4	4	8	1.03339	0.0473807	0.855925	0.855925
Elongin-C	Eloc	P83940	0.00120941	0.00128776	0.00140403	0.00113681	0.00113484	0.00166424	0.00135586	0.000662906	-9.69147	-9.60091	-9.4762	-9.78079	-9.78328	-9.23091	-9.52656	-10.5589	0.603247	4	4	8	0.944881	-0.0817952	0.726765	0.726765
Myosin-10	Myh10	Q61879	0.000950627	0.00137211	0.000462463	0.00081016	0.00149859	0.000542634	0.000373011	0.000868435	-10.0388	-9.50938	-11.0783	-10.2695	-9.38217	-10.8477	-11.3885	-10.1693	0.633396	4	4	8	0.9626	-0.0549918	0.743445	0.743445
D-beta-hydroxybutyrate dehydrogenase, mitochondrial	Bdh1	Q80XN0	0.000859316	0.000271107	0.000190019	0.000358991	0.000716743	0.000291972	0.000481689	0.000366343	-10.1845	-11.8488	-12.3615	-11.4437	-10.4462	-11.7418	-11.0196	-11.4145	0.454542	4	4	8	1.36662	0.45061	0.583423	0.583423
Acyl carrier protein, mitochondrial	Ndufab1	Q9CR21	0.0008537	0.000606003	0.000707915	0.000481471	0.000801066	0.000783171	0.00047854	0.000467933	-10.194	-10.6884	-10.4641	-11.0202	-10.2858	-10.3184	-11.029	-11.0614	0.697241	4	4	8	0.969642	-0.0444752	0.790634	0.790634
Protein S100-A6	S100a6	P14069	0.00108847	0	0	0	0	0	0.000406759	0.000397743	-9.84347	-26.5754	-26.5754	-26.5754	-26.5754	-26.5754	-11.2635	-11.2958	0.68085	1	2	3	NA	NA	0.777141	0.777141
Serine beta-lactamase-like protein LACTB, mitochondrial	Lactb	Q9EP89	0	0.000211108	0	0	0.000178598	0	0	9.78057e-05	-26.5754	-12.2097	-26.5754	-26.5754	-12.4509	-26.5754	-26.5754	-13.3196	0.660657	1	2	3	NA	NA	0.763848	0.763848
Ig heavy chain V regions TEPC 15/S107/HPCM1/HPCM2/HPCM3	NA	P01787	0.000518318	0.000735861	0	0	0.000389089	0.000316998	0.000290542	0.000426154	-10.9138	-10.4083	-26.5754	-26.5754	-11.3276	-11.6232	-11.7489	-11.1963	0.218156	2	4	6	Inf	Inf	0.54268	0.54268
Calmodulin-1	Calm1	P0DP26	0.00042685	0	0	0	0	0	0	0.000584917	-11.1939	-26.5754	-26.5754	-26.5754	-26.5754	-26.5754	-26.5754	-10.7395	0.986894	1	1	2	NA	NA	0.999825	0.999825
High affinity immunoglobulin gamma Fc receptor I	Fcgr1	P26151	0	0.000343402	0.000160461	0.000242519	0.00012105	0.000246554	0.000271173	0.000176775	-26.5754	-11.5078	-12.6054	-12.0096	-13.012	-11.9858	-11.8484	-12.4657	0.399714	3	4	7	Inf	Inf	0.54268	0.54268
Unconventional myosin-XVIIIa	Myo18a	Q9JMH9	0.00026472	0.000519524	0.000144621	0.000468383	0.000502643	0.000209518	0.000174575	0.000409693	-11.8832	-10.9105	-12.7553	-11.06	-10.9581	-12.2206	-12.4838	-11.2531	0.881	4	4	8	1.09597	0.132205	0.950854	0.950854
40S ribosomal protein S14	Rps14	P62264	0.000907056	0.00112679	0.00105302	0.00102313	0.000851132	0.00110949	0.000889786	0.00136724	-10.1065	-9.79356	-9.89123	-9.93279	-10.1983	-9.81587	-10.1342	-9.5145	0.921061	4	4	8	1.02608	0.0371429	0.974486	0.974486
Troponin T, cardiac muscle	Tnnt2	P50752	0.000705488	0.00100159	0.000267435	0.000682083	0.000832218	0.000493108	0.000338966	0.000828632	-10.4691	-9.96348	-11.8685	-10.5177	-10.2307	-10.9858	-11.5265	-10.237	0.909966	4	4	8	1.03857	0.0546012	0.968365	0.968365
Ig lambda-1 chain V region S178	NA	P01725	0	0.000429252	0.000802304	0.000682083	0	0.000369831	0.000508449	0.000828632	-26.5754	-11.1859	-10.2835	-10.5177	-26.5754	-11.4008	-10.9416	-10.237	0.508864	3	3	6	NA	NA	0.634861	0.634861
Mitochondrial carnitine/acylcarnitine carrier protein	Slc25a20	Q9Z2Z6	0.00153925	0.00109264	0.00109405	0.00140551	0.00148561	0.00100863	0.00141749	0.00108475	-9.34355	-9.83795	-9.83609	-9.47469	-9.39472	-9.95337	-9.46243	-9.8484	0.805516	4	4	8	0.988924	-0.0160687	0.890461	0.890461
39S ribosomal protein L9, mitochondrial	Mrpl9	Q99N94	0.000241882	0	0	0	0.000181575	0	0	0	-12.0134	-26.5754	-26.5754	-26.5754	-12.4271	-26.5754	-26.5754	-26.5754	0.391002	1	1	2	NA	NA	0.54268	0.54268
Alpha-crystallin B chain	Cryab	P23927	0.00507952	0.00386327	0.00300864	0.00422892	0.00449398	0.00399417	0.0039659	0.00407687	-7.62109	-8.01596	-8.37667	-7.88549	-7.79779	-7.96788	-7.97813	-7.93832	0.690334	4	4	8	1.05021	0.0706736	0.785019	0.785019
ATP-binding cassette sub-family E member 1	Abce1	P61222	0	0.000115322	0	0	8.13022e-05	0	6.07104e-05	0	-26.5754	-13.0819	-26.5754	-26.5754	-13.5862	-26.5754	-14.0075	-26.5754	0.663609	1	2	3	NA	NA	0.764156	0.764156
NADH dehydrogenase [ubiquinone] iron-sulfur protein 4, mitochondrial	Ndufs4	Q9CXZ1	0.000907056	0.00090143	0.00144415	0.000954917	0.000953268	0.000887594	0.0010169	0.00149154	-10.1065	-10.1155	-9.43556	-10.0323	-10.0348	-10.1378	-9.94159	-9.38897	0.85572	4	4	8	1.07543	0.104909	0.927963	0.927963
Myosin regulatory light polypeptide 9	Myl9	Q9CQ19	0	0.00115898	0	0	0	0.000887594	0	0	-26.5754	-9.75291	-26.5754	-26.5754	-26.5754	-10.1378	-26.5754	-26.5754	0.391002	1	1	2	NA	NA	0.54268	0.54268
40S ribosomal protein S13	Rps13	P62301	0.000640275	0.00181801	0.00184058	0.000802451	0.00208277	0.00143581	0.00119635	0.0007019	-10.609	-9.10342	-9.08562	-10.2833	-8.90727	-9.44391	-9.70713	-10.4764	0.812948	4	4	8	1.39185	0.477	0.896504	0.896504
BAG family molecular chaperone regulator 3	Bag3	Q9JLV1	0	0	0.000271748	0.000176022	0.000131788	7.15802e-05	6.56063e-05	0.000128304	-26.5754	-26.5754	-11.8454	-12.4719	-12.8894	-13.7699	-13.8956	-12.928	0.24885	2	4	6	Inf	Inf	0.54268	0.54268
Alpha-mannosidase 2C1	Man2c1	Q91W89	0	6.66081e-05	8.29969e-05	0.000141121	0.000117398	5.73875e-05	8.76637e-05	5.14323e-05	-26.5754	-13.8737	-13.5564	-12.7907	-13.0562	-14.0887	-13.4775	-14.2467	0.460107	3	4	7	Inf	Inf	0.586878	0.586878
Pyruvate dehydrogenase E1 component subunit beta, mitochondrial	Pdhb	Q9D051	0.00241882	0.00191513	0.00166632	0.00258842	0.00216493	0.00176381	0.00229454	0.00219269	-8.69148	-9.02834	-9.22911	-8.59371	-8.85146	-9.14708	-8.76757	-8.83308	0.935359	4	4	8	1.01004	0.0144084	0.982773	0.982773
3-hydroxyisobutyrate dehydrogenase, mitochondrial	Hibadh	Q99L13	0	0.000294344	0.000137538	0.000155905	0	0.000190199	0.000348651	0.000113641	-26.5754	-11.7302	-12.8278	-12.647	-26.5754	-12.3601	-11.4859	-13.1031	0.895135	3	3	6	NA	NA	0.961559	0.961559
60S ribosomal protein L6	Rpl6	P47911	0.000533563	0.000984755	0.000920289	0.000882696	0.00104139	0.000522114	0.000897263	0.000760392	-10.872	-9.98793	-10.0856	-10.1458	-9.90727	-10.9033	-10.1222	-10.361	0.904505	4	4	8	1.07959	0.110489	0.965066	0.965066
Phospholipid hydroperoxide glutathione peroxidase	Gpx4	O70325	0.00131935	0.00105362	0.00131286	0.00024803	0.00111421	0.000806904	0.00110934	0.00072317	-9.56594	-9.89042	-9.57306	-11.9771	-9.80975	-10.2753	-9.81606	-10.4334	0.73904	4	4	8	1.34275	0.425186	0.830055	0.830055
60S ribosomal protein L14	Rpl14	Q9CR57	0.000453528	0.000321939	0.00050144	0.000454722	0.000567422	0.000369831	0.000338966	0.000414316	-11.1065	-11.6009	-10.9616	-11.1027	-10.7833	-11.4008	-11.5265	-11.2369	0.8391	4	4	8	0.996753	-0.00469133	0.916478	0.916478
Myosin-7	Myh7	Q91Z83	0	0.00206734	0	0	0.00164883	0	0	0	-26.5754	-8.918	-26.5754	-26.5754	-9.24433	-26.5754	-26.5754	-26.5754	0.991603	1	1	2	NA	NA	0.999825	0.999825
Oxidoreductase NAD-binding domain-containing protein 1	Oxnad1	Q8VE38	0	0	0.000137538	0	0	0	0	0.000170461	-26.5754	-26.5754	-12.8278	-26.5754	-26.5754	-26.5754	-26.5754	-12.5182	0.989976	1	1	2	NA	NA	0.999825	0.999825
ADP-ribose glycohydrolase MACROD1	Macrod1	Q922B1	0.000414654	0.000367931	0.000412613	0.000389762	0.000544725	0.000316998	0.000290542	0.000397743	-11.2358	-11.4082	-11.2429	-11.3251	-10.8422	-11.6232	-11.7489	-11.2958	0.721854	4	4	8	0.974971	-0.036569	0.814761	0.814761
Dynamin-like 120 kDa protein, mitochondrial	Opa1	P58281	0.000130747	0.00016242	0.000216839	0.000172057	0.000122686	0.000179918	0.000256515	0.000143331	-12.9008	-12.5879	-12.171	-12.5047	-12.9926	-12.4403	-11.9286	-12.7683	0.944534	4	4	8	1.01552	0.0222245	0.988995	0.988995
Phosphoglycerate mutase 2	Pgam2	O70250	0.000875778	0.000444054	0.000580978	0.000752644	0.0010331	0.000535617	0.000490916	0.000685764	-10.1571	-11.1369	-10.7492	-10.3757	-9.91879	-10.8665	-10.9922	-10.51	0.816593	4	4	8	1.03549	0.050312	0.899051	0.899051
ATP synthase membrane subunit DAPIT, mitochondrial	Atp5md	Q78IK2	0.00362823	0.00214626	0.00160461	0.00272833	0.00272362	0.00332848	0.00237276	0.00132581	-8.10652	-8.86395	-9.28356	-8.51776	-8.52025	-8.23092	-8.71921	-9.5589	0.8835	4	4	8	1.06654	0.0929391	0.952425	0.952425
Pyruvate kinase PKM	Pkm	P52480	0.00106345	0.000444054	0.000331988	0.000282241	0.000328713	0.000306067	0.00038572	0.00096007	-9.87702	-11.1369	-11.5565	-11.7907	-11.5708	-11.6738	-11.3401	-10.0246	0.937216	4	4	8	1.39045	0.475552	0.983592	0.983592
Ig kappa chain V-II region VKappa167	Gm5153	P01627	0.000558188	0.000594349	0.000555441	0	0	0.000512074	0.000469338	0.000611913	-10.8069	-10.7164	-10.8141	-26.5754	-26.5754	-10.9313	-11.0571	-10.6744	0.990751	3	3	6	Inf	Inf	0.999825	0.999825
60S ribosomal protein L36a	Rpl36a	P83882	0	0	0	0.000454722	0	0.000369831	0	0	-26.5754	-26.5754	-26.5754	-11.1027	-26.5754	-11.4008	-26.5754	-26.5754	0.991243	1	1	2	NA	NA	0.999825	0.999825
E3 ubiquitin-protein ligase RBX1	Rbx1	P62878	0	0.00107313	0.000802304	0.000909444	0	0.000924577	0.000847415	0.000828632	-26.5754	-9.86394	-10.2835	-10.1027	-26.5754	-10.0789	-10.2046	-10.237	0.380961	3	3	6	NA	NA	0.54268	0.54268
Hydroxymethylglutaryl-CoA lyase, mitochondrial	Hmgcl	P38060	0	0	0	0.00016049	0	0.000195793	0	0	-26.5754	-26.5754	-26.5754	-12.6051	-26.5754	-12.3183	-26.5754	-26.5754	0.990852	1	1	2	NA	NA	0.999825	0.999825
Multifunctional protein ADE2	Paics	Q9DCL9	0	0	0	0.000174149	0	0	0	0.000211566	-26.5754	-26.5754	-26.5754	-12.4873	-26.5754	-26.5754	-26.5754	-12.2065	0.391002	1	1	2	NA	NA	0.54268	0.54268
Serine protease HTRA2, mitochondrial	Htra2	Q9JIY5	0	0	9.82413e-05	0	0	0	0	8.11721e-05	-26.5754	-26.5754	-13.3132	-26.5754	-26.5754	-26.5754	-26.5754	-13.5885	0.990558	1	1	2	NA	NA	0.999825	0.999825
Laminin subunit alpha-2	Lama2	Q60675	3.16415e-05	0.000127278	0	3.17248e-05	0.00019002	0	0	2.89058e-05	-14.9474	-12.9396	-26.5754	-14.9436	-12.3615	-26.5754	-26.5754	-15.0778	0.501248	3	2	5	NA	NA	0.626216	0.626216
Carbonic anhydrase 2	Ca2	P00920	0	0	0.000248991	0.000188161	0	0	0.000210393	0.000274306	-26.5754	-26.5754	-11.9716	-12.3757	-26.5754	-26.5754	-12.2146	-11.8319	0.681945	2	2	4	NA	NA	0.777418	0.777418
60S ribosomal protein L7	Rpl7	P14148	0	0	0.000388211	0.000176022	0	0	0.000656063	0	-26.5754	-26.5754	-11.3308	-12.4719	-26.5754	-26.5754	-10.5739	-26.5754	0.421615	2	1	3	NA	NA	0.556246	0.556246
DnaJ homolog subfamily A member 3, mitochondrial	Dnaja3	Q99M87	0	0	0.00013886	0.00026234	0	0.000170691	0	0.000191223	-26.5754	-26.5754	-12.814	-11.8962	-26.5754	-12.5162	-26.5754	-12.3524	0.994875	2	2	4	NA	NA	0.999825	0.999825
Splicing factor, proline- and glutamine-rich	Sfpq	Q8VIJ6	0	0	6.41843e-05	0	0	0	5.42346e-05	0	-26.5754	-26.5754	-13.9272	-26.5754	-26.5754	-26.5754	-14.1702	-26.5754	0.391002	1	1	2	NA	NA	0.54268	0.54268
Sodium/calcium exchanger 1	Slc8a1	P70414	0	0	4.45724e-05	0	0	0	3.76629e-05	0	-26.5754	-26.5754	-14.4532	-26.5754	-26.5754	-26.5754	-14.6961	-26.5754	0.391002	1	1	2	NA	NA	0.54268	0.54268
60S ribosomal protein L38	Rpl38	Q9JJI8	0	0	0.000601728	0	0	0	0.000508449	0	-26.5754	-26.5754	-10.6986	-26.5754	-26.5754	-26.5754	-10.9416	-26.5754	0.391002	1	1	2	NA	NA	0.54268	0.54268
ATPase inhibitor, mitochondrial	Atp5if1	O35143	0	0	0.000401152	0	0	0	0.000338966	0	-26.5754	-26.5754	-11.2835	-26.5754	-26.5754	-26.5754	-11.5265	-26.5754	0.391002	1	1	2	NA	NA	0.54268	0.54268
39S ribosomal protein L13, mitochondrial	Mrpl13	Q9D1P0	0.000518318	0.000490574	0	0	0.000389089	0.000211332	0.000290542	0.000189402	-10.9138	-10.9932	-26.5754	-26.5754	-11.3276	-12.2081	-11.7489	-12.3662	0.21974	2	4	6	Inf	Inf	0.54268	0.54268
Lipoprotein lipase	Lpl	P11152	0.000205371	0.000291568	0.00027248	0.000102956	0.000256946	0.000251206	0.000153494	0.000187615	-12.2494	-11.7438	-11.8415	-13.2455	-11.9262	-11.9588	-12.6694	-12.3799	0.926218	4	4	8	1.12458	0.16938	0.978808	0.978808
Acetyl-CoA acetyltransferase, mitochondrial	Acat1	Q8QZT1	0.00419262	0.00268998	0.00267435	0.00206141	0.00357097	0.00251485	0.00320888	0.00256324	-7.89793	-8.53818	-8.54659	-8.92215	-8.12946	-8.63531	-8.28371	-8.60781	0.674439	4	4	8	1.05748	0.0806366	0.772303	0.772303
28S ribosomal protein S22, mitochondrial	Mrps22	Q9CXW2	0.00026548	0.000188452	0.00011741	0.000199634	0	0.000216486	0.000248024	0.000339537	-11.8791	-12.3734	-13.056	-12.2903	-26.5754	-12.1734	-11.9772	-11.5241	0.471436	4	3	7	1.2405	0.310925	0.598223	0.598223
Protein 4.1	Epb41	P48193	0.000529116	0.000804848	0.000325936	0.000511563	0.000992988	0.000300488	0.000169483	0.000621474	-10.8841	-10.279	-11.5831	-10.9328	-9.97592	-11.7004	-12.5265	-10.652	0.622573	4	4	8	0.99622	-0.00546306	0.740385	0.740385
Talin-2	Tln2	Q71LX4	0	2.02796e-05	0	0	0	0	0	2.34888e-05	-26.5754	-15.5889	-26.5754	-26.5754	-26.5754	-26.5754	-26.5754	-15.3771	0.991403	1	1	2	NA	NA	0.999825	0.999825
ATP synthase-coupling factor 6, mitochondrial	Atp5pf	P97450	0.00302352	0.00128776	0.00100288	0.00113681	0.00158878	0.00147932	0.00169483	0.00149154	-8.36955	-9.60091	-9.96162	-9.78079	-9.29786	-9.40084	-9.20463	-9.38897	0.791134	4	4	8	1.16906	0.225349	0.879895	0.879895
Sodium/potassium-transporting ATPase subunit beta-1	Atp1b1	P14094	0.000207327	0.000220758	0.000137538	0.000155905	0	0.000126799	0.000232434	0.000397743	-12.2357	-12.1452	-12.8278	-12.647	-26.5754	-12.9451	-12.0708	-11.2958	0.445803	4	3	7	1.20388	0.267697	0.577518	0.577518
Protein S100-A11	S100a11	P50543	0.00197903	0.000702413	0	0	0.000990409	0.000605178	0.000554672	0.00072317	-8.98098	-10.4754	-26.5754	-26.5754	-9.97967	-10.6903	-10.8161	-10.4334	0.207055	2	4	6	Inf	Inf	0.54268	0.54268
Alpha-actinin-2	Actn2	Q9JI91	0.0013257	0.00136205	0.000925735	0.000996891	0.00172845	0.000874792	0.000684451	0.00122383	-9.55902	-9.51999	-10.0771	-9.97026	-9.17629	-10.1588	-10.5127	-9.67437	0.725915	4	4	8	0.978267	-0.0316992	0.817327	0.817327
Peroxiredoxin-4	Prdx4	O08807	0	0	0.000232927	0.000264032	0.000263576	0	0.000196819	0	-26.5754	-26.5754	-12.0678	-11.8869	-11.8894	-26.5754	-12.3108	-26.5754	0.992476	2	2	4	NA	NA	0.999825	0.999825
Elongation factor 2	Eef2	P58252	0.000687453	0.000596435	0.00055739	0.000201035	0.000458716	0.000397082	0.000449576	0.000690817	-10.5064	-10.7113	-10.809	-12.2802	-11.0901	-11.2982	-11.1191	-10.4994	0.903988	4	4	8	1.39398	0.479206	0.965066	0.965066
Presequence protease, mitochondrial	Pitrm1	Q8K411	9.30314e-05	6.60388e-05	0.000123431	0	9.31153e-05	7.58627e-05	5.21486e-05	5.09927e-05	-13.3918	-13.8861	-12.9839	-26.5754	-13.3905	-13.6861	-14.2267	-14.2591	0.440944	3	4	7	Inf	Inf	0.573794	0.573794
NLR family member X1	Nlrx1	Q3TL44	0	0	4.45724e-05	0	5.04375e-05	0	0	0	-26.5754	-26.5754	-14.4532	-26.5754	-14.2749	-26.5754	-26.5754	-26.5754	0.993427	1	1	2	NA	NA	0.999825	0.999825
Protein NipSnap homolog 2	Nipsnap2	O55126	0.00164919	0.00124873	0.00167754	0.00190157	0.00222842	0.00134484	0.00147912	0.0015066	-9.24402	-9.64531	-9.21943	-9.03859	-8.80976	-9.53834	-9.40103	-9.37447	0.974309	4	4	8	1.02555	0.0363968	0.999516	0.999516
60S ribosomal protein L35a	Rpl35a	O55142	0.00139547	0.00178305	0.00111088	0.00125923	0.00146657	0.00119484	0.00140801	0.00152978	-9.48502	-9.13143	-9.81407	-9.63323	-9.41333	-9.70896	-9.47211	-9.35245	0.898312	4	4	8	1.05085	0.0715515	0.962703	0.962703
60S ribosomal protein L12	Rpl12	P35979	0.00141098	0.00114467	0.00173832	0.000909444	0.00136181	0.00110949	0.00135586	0.0014363	-9.46908	-9.77084	-9.16808	-10.1027	-9.52025	-9.81587	-9.52656	-9.44342	0.827673	4	4	8	1.07343	0.102227	0.908348	0.908348
40S ribosomal protein S24	Rps24	P62849	0	0.000515103	0	0	0	0.000295865	0	0.000265162	-26.5754	-10.9228	-26.5754	-26.5754	-26.5754	-11.7227	-26.5754	-11.8808	0.422064	1	2	3	NA	NA	0.556246	0.556246
Voltage-dependent anion-selective channel protein 1	Vdac1	Q60932	0.000226764	0.000724363	0.000300864	0.000426302	0.000425566	0.000277373	0.000381337	0.000559327	-12.1065	-10.431	-11.6986	-11.1958	-11.1983	-11.8158	-11.3566	-10.804	0.905807	4	4	8	1.20978	0.274747	0.965066	0.965066
Cytochrome b-c1 complex subunit 9	Uqcr10	Q8R1I1	0.00259159	0.00220758	0.00137538	0.00155905	0.00194545	0.00158499	0.00174325	0.00255692	-8.59194	-8.82331	-9.50595	-9.32511	-9.00568	-9.3013	-9.16399	-8.61137	0.897061	4	4	8	1.09404	0.129672	0.962493	0.962493
Phosphoglycerate mutase 1	Pgam1	Q9DBJ1	0.000625556	0	0	0	0	0	0	0.000685764	-10.6426	-26.5754	-26.5754	-26.5754	-26.5754	-26.5754	-26.5754	-10.51	0.99627	1	1	2	NA	NA	0.999825	0.999825
Glucose-6-phosphate isomerase	Gpi	P06745	0.000172773	0	0	0	0	0	0	0.000157835	-12.4988	-26.5754	-26.5754	-26.5754	-26.5754	-26.5754	-26.5754	-12.6292	0.995809	1	1	2	NA	NA	0.999825	0.999825
Fatty acid-binding protein, adipocyte	Fabp4	P04117	0.00193505	0.00154531	0.00224645	0.00200078	0.00181575	0.00236692	0.00189821	0.00159097	-9.0134	-9.33788	-8.79813	-8.96522	-9.10521	-8.72277	-9.04114	-9.29587	0.956987	4	4	8	1.02755	0.0392034	0.996084	0.996084
Methyl-CpG-binding protein 2	Mecp2	Q9Z2D6	0	0	0	0.000104936	0	0	0	0.000114734	-26.5754	-26.5754	-26.5754	-13.2181	-26.5754	-26.5754	-26.5754	-13.0893	0.391002	1	1	2	NA	NA	0.54268	0.54268
Pyruvate dehydrogenase E1 component subunit alpha, somatic form, mitochondrial	Pdha1	P35486	0.00362823	0.00305468	0.00268678	0.00247453	0.00342036	0.00273503	0.00293245	0.00268246	-8.10652	-8.35476	-8.5399	-8.65862	-8.19163	-8.51422	-8.41367	-8.54222	0.995006	4	4	8	1.00338	0.00487036	0.999825	0.999825
ATP synthase subunit epsilon, mitochondrial	Atp5f1e	P56382	0.00604704	0.00429252	0.00401152	0.00363778	0.00453937	0.00517763	0.00542346	0.00265162	-7.36955	-7.86395	-7.96163	-8.10272	-7.78329	-7.59349	-7.52657	-8.5589	0.869589	4	4	8	1.00944	0.0135546	0.939651	0.939651
RNA-splicing ligase RtcB homolog	Rtcb	Q99LF4	0	0	8.7524e-05	0	0	8.06904e-05	0	0	-26.5754	-26.5754	-13.4798	-26.5754	-26.5754	-13.5971	-26.5754	-26.5754	0.995951	1	1	2	NA	NA	0.999825	0.999825
Vinculin	Vcl	Q64727	0.000217073	0.000506298	0.000144003	0.000139915	0.000419019	0.000189657	5.21486e-05	0.000322954	-12.1695	-10.9477	-12.7615	-12.8031	-11.2207	-12.3642	-14.2267	-11.5963	0.819406	4	4	8	1.24382	0.314774	0.90036	0.90036
S-formylglutathione hydrolase	Esd	Q9R0P3	0	0.000166162	0.000310569	0.000440054	0.000439294	0	0.000131213	0.000320761	-26.5754	-12.555	-11.6528	-11.15	-11.1525	-26.5754	-12.8957	-11.6062	0.99096	3	3	6	Inf	Inf	0.999825	0.999825
Caveolae-associated protein 1	Cavin1	O54724	0.00156673	0.00134629	0.00114875	0.00111614	0.00154751	0.000706041	0.00157157	0.00131075	-9.31802	-9.53678	-9.7657	-9.80726	-9.33582	-10.4679	-9.31357	-9.57539	0.841423	4	4	8	1.01365	0.0195567	0.917916	0.917916
Protein-glutamine gamma-glutamyltransferase E	Tgm3	Q08189	0.000141359	0.000100345	0.000281327	0	0.000424461	0	7.92388e-05	0	-12.7882	-13.2826	-11.7954	-26.5754	-11.202	-26.5754	-13.6233	-26.5754	0.390059	3	2	5	NA	NA	0.54268	0.54268
Protein FAM136A	Fam136a	Q9CR98	0.000453528	0.000965818	0.00075216	0.000852604	0.000510679	0.000970806	0.0010169	0.000497179	-11.1065	-10.0159	-10.3767	-10.1958	-10.9353	-10.0085	-9.94159	-10.9739	0.884878	4	4	8	1.01657	0.02371	0.952785	0.952785
Biglycan	Bgn	P28653	0.000345545	0.000551896	0.000458459	0.000389762	0.000583634	0.000264165	0.000484237	0.000426154	-11.4988	-10.8233	-11.0909	-11.3251	-10.7426	-11.8862	-11.012	-11.1963	0.951987	4	4	8	1.07932	0.110119	0.993378	0.993378
40S ribosomal protein S18	Rps18	P62270	0.00463607	0.00386327	0.00280806	0.00318306	0.00438806	0.00369831	0.0030507	0.00342501	-7.75288	-8.01596	-8.4762	-8.29537	-7.8322	-8.07891	-8.35664	-8.18967	0.722743	4	4	8	1.01656	0.0236899	0.814761	0.814761
Y-box-binding protein 1	Ybx1	P62960	0.00131019	0.000786963	0.00187204	0.00136417	0.00128616	0.00117113	0.00152535	0.00138105	-9.57599	-10.3114	-9.06116	-9.51775	-9.60271	-9.73787	-9.35664	-9.5	0.73673	4	4	8	1.07425	0.103331	0.828481	0.828481
Signal recognition particle 14 kDa protein	Srp14	P16254	0.000837283	0	0.000740588	0	0.000419019	0.000512074	0.000312892	0.000305956	-10.222	-26.5754	-10.399	-26.5754	-11.2207	-10.9313	-11.642	-11.6743	0.231943	2	4	6	Inf	Inf	0.54268	0.54268
NADH dehydrogenase [ubiquinone] 1 alpha subcomplex subunit 2	Ndufa2	Q9CQ75	0.00263871	0.00280965	0.00306334	0.0024803	0.00222842	0.00322761	0.00332803	0.00216951	-8.56595	-8.47539	-8.35067	-8.65526	-8.80976	-8.27531	-8.23111	-8.84841	0.808578	4	4	8	0.988593	-0.0165515	0.892764	0.892764
60S ribosomal protein L15	Rpl15	Q9CZM2	0.000302352	0.000536565	0.00140403	0.000454722	0.000453937	0.000369831	0.000847415	0.000994358	-11.6914	-10.8639	-9.4762	-11.1027	-11.1052	-11.4008	-10.2046	-9.97393	0.81723	4	4	8	1.24523	0.316408	0.899051	0.899051
Nexilin	Nexn	Q7TPW1	0.000151176	0.000429252	0.000133717	0.000189468	0.000340453	0	0	0.000580042	-12.6914	-11.1859	-12.8684	-12.3657	-11.5202	-26.5754	-26.5754	-10.7515	0.249333	4	2	6	1.32837	0.409652	0.54268	0.54268
Tubulin beta-5 chain	Tubb5	P99024	0.000725645	0	0.000433244	0.000545667	0	0.000843214	0	0.000835261	-10.4284	-26.5754	-11.1725	-10.8397	-26.5754	-10.2118	-26.5754	-10.2255	0.668751	3	2	5	Inf	Inf	0.768456	0.768456
Ankyrin-1	Ank1	Q02357	0	3.78752e-05	0	0	0	0	0	3.89944e-05	-26.5754	-14.688	-26.5754	-26.5754	-26.5754	-26.5754	-26.5754	-14.646	0.998412	1	1	2	NA	NA	0.999825	0.999825
Complement C1q subcomponent subunit C	C1qc	Q02105	0	0.000297175	0	0	0	0	0	0.000305956	-26.5754	-11.7164	-26.5754	-26.5754	-26.5754	-26.5754	-26.5754	-11.6743	0.998729	1	1	2	NA	NA	0.999825	0.999825
Desmin	Des	P31001	0.00109531	0.000874703	0.000363307	0.000566258	0.00138751	0.000586147	0.000383735	0.000562844	-9.83443	-10.1589	-11.4265	-10.7862	-9.49328	-10.7364	-11.3476	-10.795	0.843768	4	4	8	0.996769	-0.00466884	0.91888	0.91888
40S ribosomal protein S15a	Rps15a	P62245	0.00145129	0.00120191	0.00144415	0.00109133	0.0014526	0.00118346	0.000949105	0.00159097	-9.42844	-9.70045	-9.43556	-9.83968	-9.42714	-9.72276	-10.0411	-9.29587	0.93531	4	4	8	1.02515	0.0358305	0.982773	0.982773
Unconventional myosin-Ic	Myo1c	Q9WTI7	0.000118958	0.000253329	5.91863e-05	4.47268e-05	0.000334872	0	0	0.000146709	-13.0371	-11.9466	-14.0441	-14.4482	-11.5441	-26.5754	-26.5754	-12.7347	0.267091	4	2	6	1.52379	0.60766	0.54268	0.54268
ADP-ribosylation factor-like protein 8B	Arl8b	Q9CQW2	0.000329839	0.000234138	0	0	0	0.000201726	0.000184891	0.000180792	-11.5659	-12.0603	-26.5754	-26.5754	-26.5754	-12.2752	-12.401	-12.4333	0.670782	2	3	5	Inf	Inf	0.769501	0.769501
Prostaglandin E synthase 2	Ptges2	Q8BWM0	0.000168755	0.000299478	0	0.000253798	0.00019002	0.000206417	0.00018919	0.000138748	-12.5327	-11.7052	-26.5754	-11.944	-12.3615	-12.2421	-12.3678	-12.8151	0.441041	3	4	7	Inf	Inf	0.573794	0.573794
40S ribosomal protein S2	Rps2	P25444	0.000702237	0.000913892	0.00108699	0.000792097	0.000615012	0.00100212	0.000984095	0.00089813	-10.4757	-10.0957	-9.84543	-10.302	-10.6671	-9.96271	-9.9889	-10.1208	0.960042	4	4	8	1.00288	0.00415439	0.996084	0.996084
Nascent polypeptide-associated complex subunit alpha, muscle-specific form	Naca	P70670	0.000544234	0.000725827	0.000459501	0.000768894	0.000953268	0.000373193	0.000443737	0.00072317	-10.8435	-10.4281	-11.0876	-10.3449	-10.0348	-11.3878	-11.138	-10.4334	0.853768	4	4	8	1.04299	0.060728	0.926948	0.926948
Delta-1-pyrroline-5-carboxylate dehydrogenase, mitochondrial	Aldh4a1	Q8CHT0	0	0.000332324	0.000271748	0.000132016	0.000395365	0.00014316	9.84095e-05	9.62282e-05	-26.5754	-11.5551	-11.8454	-12.8869	-11.3045	-12.77	-13.3107	-13.343	0.511543	3	4	7	Inf	Inf	0.636462	0.636462
Mitochondrial pyruvate carrier 1	Mpc1	P63030	0.00181411	0.00150238	0.00160461	0.000682083	0.00158878	0.00166424	0.00118638	0.00116008	-9.10651	-9.37852	-9.28356	-10.5177	-9.29786	-9.23091	-9.7192	-9.75154	0.801031	4	4	8	1.10592	0.145246	0.886578	0.886578
Glutathione S-transferase Mu 1	Gstm1	P10649	0.000279094	0.000396233	0.000462867	0.000419744	0.000209509	0.000341382	0.000625784	0.000382446	-11.8069	-11.3013	-11.0771	-11.2182	-12.2206	-11.5163	-10.642	-11.3524	0.683113	4	4	8	0.96884	-0.0456701	0.777776	0.777776
Ig kappa chain V region Mem5 (Fragment)	NA	P84750	0	0	0.00111088	0	0	0.000341382	0.000312892	0.000458935	-26.5754	-26.5754	-9.81407	-26.5754	-26.5754	-11.5163	-11.642	-11.0894	0.223201	1	3	4	NA	NA	0.54268	0.54268
Adenosylhomocysteinase	Ahcy	P50247	0	0	0	0.000170521	0.000170226	0	0	0	-26.5754	-26.5754	-26.5754	-12.5177	-12.5202	-26.5754	-26.5754	-26.5754	0.99992	1	1	2	NA	NA	0.99992	0.99992

## Sheet: QSPEC
ProteinName	GeneName	Protein	Len	52753 SpC	52757 SpC	52754 SpC	52758 SpC	52755 SpC	52759 SpC	52756 SpC	52760 SpC	LogFoldChange	Zstatistic	fdr	FDRup	FDRdown	FDR	nonzero_IgG	nonzero_IP	nonzero	FoldChange	Log2FoldChange
Ig gamma-1 chain C region secreted form	Ighg1	P01868	36	662	656	1158	1032	1300	1074	1280	1073	-0.361	-16.0906	0	0.626192	0	0	4	4	8	0.696979	-0.520813
Immunoglobulin kappa constant	Igkc	P01837	12	384	395	711	651	886	707	790	742	-0.332	-12.0918	0	0.627569	0	0	4	4	8	0.717487	-0.478975
Myosin-6	Myh6	Q02566	224	268	379	537	338	216	155	338	435	-0.274	-6.6067	0	0.633298	0	0	4	4	8	0.760332	-0.395298
Stress-70 protein, mitochondrial	Hspa9	P38647	73	256	280	305	292	413	345	319	335	-0.256	-7.0159	0	0.632023	0	0	4	4	8	0.774142	-0.36933
ATP synthase subunit alpha, mitochondrial	Atp5f1a	Q03265	60	223	295	251	329	266	379	232	361	0.112	2.8715	0.001524	0.000217	0.658488	0.000217	4	4	8	1.11851	0.161582
Desmoplakin	Dsp	E9Q557	333	370	284	239	261	355	200	320	90	-0.66	-14.6444	0	0.62688	0	0	4	4	8	0.516851	-0.952179
Sarcoplasmic/endoplasmic reticulum calcium ATPase 2	Atp2a2	O55143	115	122	235	195	273	246	300	198	298	0.142	3.2394	0.000211	2.4e-05	0.649079	2.4e-05	4	4	8	1.15258	0.204863
Myosin-9	Myh9	Q8VDD5	226	178	319	338	197	132	114	230	314	-0.167	-3.7469	4e-06	0.643971	0	0	4	4	8	0.8462	-0.24093
Myosin-7	Myh7	Q91Z83	223	0	135	179	0	0	0	0	0	-0.48	-4.0441	0	0.641957	0	0	1	1	2	0.618783	-0.692494
ADP/ATP translocase 1	Slc25a4	P48962	33	141	194	169	235	209	293	162	247	0.131	2.7411	0.003049	0.000439	0.662757	0.000439	4	4	8	1.13997	0.188993
ATP synthase subunit beta, mitochondrial	Atp5f1b	P56480	56	132	197	166	229	179	267	152	245	0.173	3.0867	0.000482	6.3e-05	0.652467	6.3e-05	4	4	8	1.18887	0.249586
Endoplasmic reticulum chaperone BiP	Hspa5	P20029	72	138	151	201	155	250	193	186	177	-0.36	-6.9515	0	0.632224	0	0	4	4	8	0.697676	-0.51937
Myosin-11	Myh11	O08638	227	131	213	259	142	93	61	149	204	-0.255	-4.5886	0	0.638271	0	0	4	4	8	0.774916	-0.367887
Actin, alpha cardiac muscle 1	Actc1	P68033	42	148	180	195	161	110	144	137	197	-0.085	-1.5015	0.258205	0.695602	0.058814	0.058814	4	4	8	0.918512	-0.122629
Aconitate hydratase, mitochondrial	Aco2	Q99KI0	85	101	148	139	171	162	195	131	172	0.035	0.5917	0.958714	0.389134	0.754986	0.389134	4	4	8	1.03562	0.0504943
3-ketoacyl-CoA thiolase, mitochondrial	Acaa2	Q8BWT1	42	108	146	151	171	139	200	127	175	0.051	0.8906	0.802014	0.252094	0.769759	0.252094	4	4	8	1.05232	0.0735774
Actin, cytoplasmic 1	Actb	P60710	42	150	123	148	101	58	43	103	122	-0.402	-5.8148	0	0.634868	0	0	4	4	8	0.668981	-0.579963
Succinate dehydrogenase [ubiquinone] flavoprotein subunit, mitochondrial	Sdha	Q8K2B3	73	70	164	118	168	134	202	130	199	0.258	4.4183	0	0	0.63561	0	4	4	8	1.29434	0.372215
Trifunctional enzyme subunit alpha, mitochondrial	Hadha	Q8BMS1	83	91	139	125	149	151	183	125	178	0.043	0.6973	0.922003	0.340052	0.762925	0.340052	4	4	8	1.04394	0.0620359
Glycogen phosphorylase, muscle form	Pygm	Q9WUB3	97	57	137	91	175	97	208	96	214	0.536	7.3743	0	0	0.630026	0	4	4	8	1.70916	0.773285
Heat shock cognate 71 kDa protein	Hspa8	P63017	71	105	112	129	111	157	117	133	155	-0.287	-4.5288	0	0.638682	0	0	4	4	8	0.750512	-0.414053
Junction plakoglobin	Jup	Q02257	82	141	159	124	145	168	104	171	63	-0.473	-7.4669	0	0.630738	0	0	4	4	8	0.62313	-0.682395
Isocitrate dehydrogenase [NADP], mitochondrial	Idh2	P54071	51	58	117	80	125	115	159	78	152	0.28	4.2612	0	0	0.636496	0	4	4	8	1.32313	0.403955
Glyceraldehyde-3-phosphate dehydrogenase	Gapdh	P16858	36	98	119	105	124	116	142	110	133	-0.04	-0.5829	0.956738	0.705696	0.40231	0.40231	4	4	8	0.960789	-0.0577078
14-3-3 protein beta/alpha	Ywhab	Q9CQV8	28	14	162	9	258	9	277	12	290	2.833	17.297	0	0	0.626355	0	4	4	8	16.9964	4.08716
ADP/ATP translocase 2	Slc25a5	P51881	33	46	87	60	95	76	145	37	137	0.535	6.5332	0	0	0.631269	0	4	4	8	1.70745	0.771842
Keratin, type II cytoskeletal 2 oral	Krt76	Q3UV17	63	91	75	80	60	93	7	42	0	-0.974	-9.4976	0	0.628951	0	0	4	3	7	0.37757	-1.40518
2-oxoglutarate dehydrogenase, mitochondrial	Ogdh	Q60597	116	45	109	76	144	123	187	81	193	0.437	6.553	0	0	0.631218	0	4	4	8	1.54806	0.630458
von Willebrand factor A domain-containing protein 8	Vwa8	Q8CC88	213	15	125	23	252	42	244	35	221	1.752	17.3299	0	0	0.626288	0	4	4	8	5.76612	2.5276
Very long-chain specific acyl-CoA dehydrogenase, mitochondrial	Acadvl	P50544	71	59	129	81	138	103	147	117	148	0.212	3.066	0.000538	7.1e-05	0.652984	7.1e-05	4	4	8	1.23615	0.305851
Trifunctional enzyme subunit beta, mitochondrial	Hadhb	Q99JY0	51	66	113	91	121	108	144	98	135	0.112	1.5532	0.222766	0.055991	0.732232	0.055991	4	4	8	1.11851	0.161582
Cytochrome b-c1 complex subunit 2, mitochondrial	Uqcrc2	Q9DB77	48	74	112	90	117	104	156	74	145	0.211	2.8758	0.001489	0.000212	0.658355	0.000212	4	4	8	1.23491	0.304409
Spectrin alpha chain, erythrocytic 1	Spta1	P08032	280	113	186	144	73	78	39	110	70	-0.426	-5.7912	0	0.634918	0	0	4	4	8	0.653116	-0.614588
MICOS complex subunit Mic60	Immt	Q8CAQ8	84	43	97	92	115	109	143	73	135	0.218	3.0625	0.000548	7.3e-05	0.653072	7.3e-05	4	4	8	1.24359	0.314508
Ig gamma-3 chain C region	NA	P03987	44	52	56	110	88	135	116	146	135	-0.345	-4.9483	0	0.636347	0	0	4	4	8	0.70822	-0.49773
General transcription factor II-I	Gtf2i	Q9ESZ8	112	69	82	105	86	120	107	98	97	-0.273	-4.1146	0	0.641491	0	0	4	4	8	0.761093	-0.393856
Spectrin beta chain, erythrocytic	Sptb	P15508	245	81	153	132	55	54	51	100	131	-0.2	-2.9274	0.000929	0.651877	7.7e-05	7.7e-05	4	4	8	0.818731	-0.288539
Myoglobin	Mb	P04247	17	59	87	77	116	88	117	80	114	0.146	1.8314	0.109659	0.023677	0.708757	0.023677	4	4	8	1.1572	0.210633
Myosin-10	Myh10	Q61879	229	60	126	122	56	44	42	68	100	-0.139	-1.6965	0.165744	0.686708	0.031106	0.031106	4	4	8	0.870228	-0.200535
Vimentin	Vim	P20152	54	22	122	47	170	13	135	32	175	1.429	14.6716	0	0	0.627354	0	4	4	8	4.17452	2.06161
Single-stranded DNA-binding protein, mitochondrial	Ssbp1	Q9CYR0	17	61	72	97	97	91	90	80	77	-0.186	-2.536	0.006586	0.65931	0.000747	0.000747	4	4	8	0.830274	-0.268341
Creatine kinase S-type, mitochondrial	Ckmt2	Q6P8J7	47	62	91	63	73	68	97	62	83	0.074	0.9692	0.731834	0.218946	0.769726	0.218946	4	4	8	1.07681	0.106759
ATP synthase subunit O, mitochondrial	Atp5po	Q9DB20	23	57	82	74	94	76	111	97	110	0.039	0.5116	0.97755	0.425517	0.746905	0.425517	4	4	8	1.03977	0.0562651
Myosin-binding protein C, cardiac-type	Mybpc3	O70468	141	51	83	72	84	87	100	70	108	0.06	0.7915	0.873155	0.296423	0.76749	0.296423	4	4	8	1.06184	0.0865617
Spectrin beta chain, non-erythrocytic 1	Sptbn1	Q62261	274	60	123	116	52	46	43	81	89	-0.232	-2.9723	0.000725	0.651215	5.8e-05	5.8e-05	4	4	8	0.792946	-0.334705
Glycogen phosphorylase, brain form	Pygb	Q8CI94	97	47	74	55	84	67	105	62	118	0.265	3.0828	0.000492	6.4e-05	0.652563	6.4e-05	4	4	8	1.30343	0.382314
ATP synthase subunit gamma, mitochondrial	Atp5f1c	Q91VR2	33	67	73	76	83	74	98	64	85	-0.036	-0.4324	1	0.689929	0.478312	0.478312	4	4	8	0.96464	-0.051937
NADH-ubiquinone oxidoreductase 75 kDa subunit, mitochondrial	Ndufs1	Q91VD9	80	39	82	74	99	81	99	65	90	0.147	1.7583	0.133209	0.030149	0.714525	0.030149	4	4	8	1.15835	0.212076
Cysteine and glycine-rich protein 3	Csrp3	P50462	21	57	69	78	89	88	94	76	95	-0.074	-0.9515	0.659662	0.717162	0.224425	0.224425	4	4	8	0.928672	-0.106759
Spectrin alpha chain, non-erythrocytic 1	Sptan1	P16546	285	64	122	108	61	57	33	84	55	-0.369	-4.3806	0	0.639714	0	0	4	4	8	0.691425	-0.532354
Myosin-4	Myh4	Q5SX39	223	46	75	56	0	48	0	24	0	-1.021	-7.4639	0	0.630745	0	0	4	1	5	0.360235	-1.47299
Carnitine O-palmitoyltransferase 1, muscle isoform	Cpt1b	Q924X2	88	33	65	55	76	72	99	50	94	0.233	2.6596	0.004655	0.000672	0.665626	0.000672	4	4	8	1.26238	0.336148
Phosphate carrier protein, mitochondrial	Slc25a3	Q8VEM8	40	42	65	50	79	69	95	46	87	0.225	2.4904	0.01067	0.001563	0.672071	0.001563	4	4	8	1.25232	0.324606
14-3-3 protein theta	Ywhaq	P68254	28	0	30	0	102	0	124	6	139	3.47	11.966	0	0	0.628044	0	1	4	5	32.1367	5.00615
Acyl-coenzyme A thioesterase 13	Acot13	Q9CQR4	15	44	47	52	64	58	48	55	47	-0.234	-2.5233	0.006984	0.659612	0.000799	0.000799	4	4	8	0.791362	-0.337591
Succinate--CoA ligase [ADP/GDP-forming] subunit alpha, mitochondrial	Suclg1	Q9WUM5	36	46	66	52	69	75	86	48	77	0.074	0.8491	0.834381	0.270375	0.769124	0.270375	4	4	8	1.07681	0.106759
Immunoglobulin heavy constant mu	Ighm	P01872	50	34	42	58	57	69	74	64	63	-0.178	-1.8958	0.094511	0.678771	0.014749	0.014749	4	4	8	0.836942	-0.2568
ATP-dependent 6-phosphofructokinase, muscle type	Pfkm	P47857	85	25	54	40	59	66	74	47	71	0.151	1.5504	0.224277	0.056434	0.732483	0.056434	4	4	8	1.163	0.217847
Elongation factor 1-alpha 2	Eef1a2	P62631	50	58	61	61	60	59	69	56	67	-0.125	-1.3554	0.344936	0.702658	0.089357	0.089357	4	4	8	0.882497	-0.180337
Beta-enolase	Eno3	P21550	47	29	51	32	57	54	63	35	60	0.196	1.9288	0.083517	0.016848	0.70164	0.016848	4	4	8	1.21653	0.282768
Ig gamma-2A chain C region secreted form	NA	P01864	37	30	39	79	71	66	68	54	60	-0.179	-1.9558	0.077496	0.676599	0.01157	0.01157	4	4	8	0.836106	-0.258242
Keratin, type II cytoskeletal 74	Krt74	Q6IFZ9	55	0	0	0	0	11	0	0	0	-1.282	-2.3733	0.01387	0.66348	0.00173	0.00173	1	0	1	0.277482	-1.84954
Elongation factor Tu, mitochondrial	Tufm	Q8BFR5	50	32	73	37	72	56	93	42	76	0.403	4.2393	0	0	0.636635	0	4	4	8	1.49631	0.581406
Ig gamma-2B chain C region	Igh-3	P01867	44	30	23	73	60	66	62	65	57	-0.363	-4.0081	0	0.642197	0	0	4	4	8	0.695586	-0.523698
Acetyl-CoA acetyltransferase, mitochondrial	Acat1	Q8QZT1	45	52	59	47	51	50	71	34	58	0.041	0.4471	0.98881	0.453826	0.739039	0.453826	4	4	8	1.04185	0.0591505
ATP synthase F(0) complex subunit B1, mitochondrial	Atp5pb	Q9CQQ7	29	39	58	42	67	53	81	38	74	0.261	2.7793	0.002493	0.000359	0.661464	0.000359	4	4	8	1.29823	0.376543
Cytochrome b-c1 complex subunit Rieske, mitochondrial	Uqcrfs1	Q9CR68	29	35	52	49	67	49	75	34	70	0.229	2.4372	0.013594	0.002015	0.674252	0.002015	4	4	8	1.25734	0.330377
Nascent polypeptide-associated complex subunit alpha, muscle-specific form	Naca	P70670	220	33	77	62	37	42	48	62	80	-0.045	-0.5102	0.988337	0.698883	0.439525	0.439525	4	4	8	0.955997	-0.0649213
Medium-chain specific acyl-CoA dehydrogenase, mitochondrial	Acadm	P45952	46	36	51	44	57	48	72	39	73	0.192	1.9923	0.069279	0.013342	0.697363	0.013342	4	4	8	1.21167	0.276997
14-3-3 protein zeta/delta	Ywhaz	P63101	28	22	27	11	32	11	35	17	46	0.565	3.6173	1.8e-05	2e-06	0.642957	2e-06	4	4	8	1.75945	0.815123
Golgin subfamily A member 4	Golga4	Q91VW5	258	2	0	90	39	107	45	103	32	-1.156	-10.6753	0	0.628259	0	0	4	3	7	0.314743	-1.66776
Pyruvate dehydrogenase E1 component subunit alpha, somatic form, mitochondrial	Pdha1	P35486	43	43	54	51	53	48	62	39	58	-0.006	-0.0629	0.998446	0.624837	0.627813	0.627813	4	4	8	0.994018	-0.00865617
Heat shock-related 70 kDa protein 2	Hspa2	P17156	70	28	0	0	0	0	0	33	0	-2.765	-6.5356	0	0.633494	0	0	2	0	2	0.0629761	-3.98905
Succinate dehydrogenase [ubiquinone] iron-sulfur subunit, mitochondrial	Sdhb	Q9CQA3	32	32	47	40	52	42	59	42	52	0.068	0.6445	0.942345	0.364669	0.759333	0.364669	4	4	8	1.07037	0.0981033
Progranulin	Grn	P28798	63	17	19	68	36	93	35	81	45	-0.868	-8.268	0	0.629647	0	0	4	4	8	0.41979	-1.25226
Hemoglobin subunit alpha	Hba	P01942	15	27	45	43	53	52	75	40	68	0.18	1.8071	0.11708	0.025689	0.710635	0.025689	4	4	8	1.19722	0.259685
Long-chain-fatty-acid--CoA ligase 1	Acsl1	P41216	78	15	55	40	60	53	68	40	70	0.3	2.9557	0.00097	0.000135	0.655967	0.000135	4	4	8	1.34986	0.432809
Succinate--CoA ligase [ADP-forming] subunit beta, mitochondrial	Sucla2	Q9Z2I9	50	28	47	32	55	40	65	41	58	0.237	2.0908	0.050944	0.009123	0.691278	0.009123	4	4	8	1.26744	0.341919
Long-chain specific acyl-CoA dehydrogenase, mitochondrial	Acadl	P51174	48	29	54	35	55	42	64	29	64	0.328	3.1118	0.000421	5.4e-05	0.651859	5.4e-05	4	4	8	1.38819	0.473204
Sodium/potassium-transporting ATPase subunit alpha-1	Atp1a1	Q8VDN2	113	20	48	36	53	47	61	31	68	0.306	2.9073	0.001258	0.000178	0.657392	0.000178	4	4	8	1.35798	0.441465
Alpha-actinin-2	Actn2	Q9JI91	104	38	66	55	41	40	35	38	64	-0.052	-0.5143	0.986982	0.699309	0.437442	0.437442	4	4	8	0.949329	-0.0750201
Cytochrome b-c1 complex subunit 1, mitochondrial	Uqcrc1	Q9CZ13	53	29	47	38	53	47	61	36	62	0.171	1.6062	0.195728	0.048094	0.727505	0.048094	4	4	8	1.18649	0.246701
Elongation factor 1-alpha 1	Eef1a1	P10126	50	15	5	16	0	0	0	8	17	-0.768	-3.1219	0.000314	0.649248	2.2e-05	2.2e-05	3	2	5	0.46394	-1.10799
ATP synthase subunit d, mitochondrial	Atp5pd	Q9DCX2	19	32	39	38	51	45	64	41	52	0.054	0.512	0.977474	0.425339	0.74695	0.425339	4	4	8	1.05548	0.0779055
14-3-3 protein gamma	Ywhag	P61982	28	20	24	12	43	11	35	12	40	0.721	4.7599	0	0	0.634279	0	4	4	8	2.05649	1.04018
NADH dehydrogenase [ubiquinone] 1 alpha subcomplex subunit 10, mitochondrial	Ndufa10	Q99LC3	41	26	34	30	36	39	46	34	40	-0.034	-0.2984	1	0.670942	0.539787	0.539787	4	4	8	0.966572	-0.0490516
Cytochrome c1, heme protein, mitochondrial	Cyc1	Q9D0M3	35	29	33	31	48	28	58	32	69	0.323	2.7315	0.003207	0.000462	0.663087	0.000462	4	4	8	1.38127	0.46599
NADH dehydrogenase [ubiquinone] iron-sulfur protein 5	Ndufs5	Q99LY9	13	48	41	49	34	47	38	42	42	-0.404	-3.5701	1.8e-05	0.645211	1e-06	1e-06	4	4	8	0.667644	-0.582849
Sarcalumenin	Srl	Q7TQ48	54	19	39	27	46	33	60	29	50	0.36	3.1668	0.000313	3.9e-05	0.650598	3.9e-05	4	4	8	1.43333	0.51937
Calcium-binding mitochondrial carrier protein Aralar1	Slc25a12	Q8BH59	75	13	43	35	48	44	60	32	50	0.26	2.3863	0.016977	0.002557	0.676422	0.002557	4	4	8	1.29693	0.375101
Heat shock protein HSP 90-beta	Hsp90ab1	P11499	83	17	31	31	42	34	53	21	80	0.458	3.7137	9e-06	1e-06	0.641655	1e-06	4	4	8	1.58091	0.660754
LIM domain-binding protein 3	Ldb3	Q9JKS4	76	17	48	38	42	42	56	32	57	0.225	1.9012	0.090371	0.018594	0.703589	0.018594	4	4	8	1.25232	0.324606
Hemoglobin subunit beta-1	Hbb-b1	P02088	16	21	35	28	46	40	56	30	60	0.278	2.466	0.01194	0.001757	0.673061	0.001757	4	4	8	1.32049	0.401069
Ubiquitin-40S ribosomal protein S27a	Rps27a	P62983	18	21	29	18	17	24	25	15	20	-0.08	-0.532	0.980408	0.701091	0.42842	0.42842	4	4	8	0.923116	-0.115416
Fructose-bisphosphate aldolase A	Aldoa	P05064	39	26	31	29	41	27	50	22	58	0.327	2.5744	0.00714	0.001035	0.668785	0.001035	4	4	8	1.3868	0.471761
Tropomyosin alpha-1 chain	Tpm1	P58771	33	47	41	49	28	19	18	33	46	-0.356	-2.9389	0.000872	0.651704	7.1e-05	7.1e-05	4	4	8	0.700473	-0.513599
Dihydrolipoyllysine-residue acetyltransferase component of pyruvate dehydrogenase complex, mitochondrial	Dlat	Q8BMF4	68	24	41	26	43	38	49	33	38	0.124	1.0516	0.649215	0.186724	0.768007	0.186724	4	4	8	1.13202	0.178894
60 kDa heat shock protein, mitochondrial	Hspd1	P63038	61	13	43	33	45	33	52	21	59	0.465	3.8218	4e-06	0	0.640316	0	4	4	8	1.59201	0.670853
Alpha-enolase	Eno1	P17182	47	21	26	17	22	21	30	20	42	0.173	1.2324	0.463707	0.12669	0.758902	0.12669	4	4	8	1.18887	0.249586
NADH dehydrogenase [ubiquinone] 1 alpha subcomplex subunit 12	Ndufa12	Q7TMF3	17	22	34	28	47	34	48	29	49	0.225	2.0307	0.061617	0.011535	0.694913	0.011535	4	4	8	1.25232	0.324606
Alpha-crystallin B chain	Cryab	P23927	20	28	33	30	36	25	39	31	41	0.031	0.2497	1	0.532269	0.706917	0.532269	4	4	8	1.03149	0.0447235
Fibronectin	Fn1	P11276	273	17	55	60	25	25	18	38	39	-0.251	-2.1004	0.045246	0.671694	0.00624	0.00624	4	4	8	0.778022	-0.362116
Unconventional myosin-XVIIIa	Myo18a	Q9JMH9	233	17	43	47	22	14	20	40	48	-0.122	-0.9644	0.648244	0.716984	0.218979	0.218979	4	4	8	0.885148	-0.176009
Heat shock 70 kDa protein 1B	Hspa1b	P17879	70	16	16	20	17	25	20	20	27	-0.241	-1.4606	0.2809	0.697569	0.066448	0.066448	4	4	8	0.785842	-0.34769
Electron transfer flavoprotein subunit alpha, mitochondrial	Etfa	Q99LC5	35	20	40	24	38	35	43	25	45	0.229	1.9	0.090678	0.018673	0.703675	0.018673	4	4	8	1.25734	0.330377
Pyruvate dehydrogenase E1 component subunit beta, mitochondrial	Pdhb	Q9D051	39	26	31	29	31	27	44	37	43	-0.01	-0.0867	0.998381	0.630322	0.620118	0.620118	4	4	8	0.99005	-0.014427
Electron transfer flavoprotein subunit beta	Etfb	Q9DCW4	28	25	27	27	41	29	47	32	36	0.06	0.4961	0.980614	0.432414	0.745129	0.432414	4	4	8	1.06184	0.0865617
Myosin-14	Myh14	Q6URW6	229	2	21	24	20	17	0	0	23	0.158	0.8029	0.866213	0.291216	0.767883	0.291216	3	3	6	1.17117	0.227946
Leucine-rich PPR motif-containing protein, mitochondrial	Lrpprc	Q6PB66	157	13	29	33	34	26	46	31	40	0.131	1.0221	0.679637	0.197935	0.768815	0.197935	4	4	8	1.13997	0.188993
Dihydrolipoyllysine-residue succinyltransferase component of 2-oxoglutarate dehydrogenase complex, mitochondrial	Dlst	Q9D2G2	49	15	33	20	34	21	47	22	48	0.493	3.6326	1.6e-05	2e-06	0.642745	2e-06	4	4	8	1.63722	0.711249
Annexin A2	Anxa2	P07356	39	44	40	32	24	32	20	32	12	-0.604	-4.545	0	0.63857	0	0	4	4	8	0.546621	-0.871388
Isocitrate dehydrogenase [NAD] subunit alpha, mitochondrial	Idh3a	Q9D6R2	40	17	25	21	28	23	36	22	42	0.211	1.5381	0.231029	0.058416	0.733587	0.058416	4	4	8	1.23491	0.304409
PDZ and LIM domain protein 5	Pdlim5	Q8CI51	63	22	24	29	32	30	38	31	35	-0.091	-0.7183	0.864403	0.714164	0.333258	0.333258	4	4	8	0.913018	-0.131285
NADH dehydrogenase [ubiquinone] 1 alpha subcomplex subunit 9, mitochondrial	Ndufa9	Q9DC69	43	23	36	22	32	28	37	31	42	0.11	0.8507	0.833179	0.269661	0.769157	0.269661	4	4	8	1.11628	0.158696
Ig heavy chain V region AC38 205.12	NA	P06330	13	13	10	48	46	33	32	20	31	-0.165	-1.326	0.364298	0.704062	0.096641	0.096641	4	4	8	0.847894	-0.238045
Alpha-actinin-4	Actn4	P57780	105	5	25	16	49	14	49	8	64	1.228	7.6635	0	0	0.629528	0	4	4	8	3.41439	1.77163
Cysteine-rich protein 2	Crip2	Q9DCT8	23	16	17	19	15	21	18	23	19	-0.367	-2.2069	0.02906	0.66833	0.003851	0.003851	4	4	8	0.69281	-0.529469
40S ribosomal protein S18	Rps18	P62270	18	23	29	27	30	21	27	21	31	0.017	0.1219	1	0.574869	0.679231	0.574869	4	4	8	1.01715	0.0245258
Calcium-binding mitochondrial carrier protein Aralar2	Slc25a13	Q9QXX4	74	6	30	25	28	20	39	21	29	0.341	2.3642	0.018632	0.00283	0.677392	0.00283	4	4	8	1.40635	0.491959
NADH dehydrogenase [ubiquinone] 1 alpha subcomplex subunit 7	Ndufa7	Q9Z1P6	13	22	30	25	38	29	38	24	29	0.08	0.6041	0.955197	0.383413	0.756076	0.383413	4	4	8	1.08329	0.115416
NADH dehydrogenase [ubiquinone] flavoprotein 1, mitochondrial	Ndufv1	Q91YT0	51	20	25	15	37	24	34	26	33	0.182	1.3063	0.395716	0.106533	0.753526	0.106533	4	4	8	1.19961	0.26257
Hexokinase-2	Hk2	O08528	103	16	33	23	29	31	36	19	34	0.151	1.1146	0.583312	0.16408	0.765601	0.16408	4	4	8	1.163	0.217847
Tubulin beta-4B chain	Tubb4b	P68372	50	27	32	14	35	11	31	16	57	0.578	3.8991	2e-06	0	0.639456	0	4	4	8	1.78247	0.833878
Tubulin alpha-1B chain	Tuba1b	P05213	50	34	25	13	26	16	32	9	46	0.337	2.3204	0.022292	0.003452	0.679371	0.003452	4	4	8	1.40074	0.486188
14-3-3 protein epsilon	Ywhae	P62259	29	9	15	4	30	7	33	6	42	1.255	5.8536	0	0	0.63284	0	4	4	8	3.50784	1.81058
Myosin light chain 3	Myl3	P09542	22	23	30	31	29	13	11	28	26	-0.228	-1.6247	0.196963	0.689865	0.039753	0.039753	4	4	8	0.796124	-0.328934
Mitochondrial 2-oxoglutarate/malate carrier protein	Slc25a11	Q9CR62	34	10	20	11	44	20	40	10	30	0.743	4.9268	0	0	0.633844	0	4	4	8	2.10223	1.07192
Protein SGT1 homolog	Sugt1	Q9CX34	38	0	41	0	52	0	52	0	57	3.196	10.1919	0	0	0.628736	0	0	4	4	24.4346	4.61085
Cytochrome b-c1 complex subunit 8	Uqcrq	Q9CQ69	10	20	26	21	30	23	29	22	26	0.033	0.2348	1	0.537583	0.703989	0.537583	4	4	8	1.03355	0.0476089
Enoyl-CoA delta isomerase 1, mitochondrial	Eci1	P42125	32	20	24	29	23	23	33	26	32	-0.09	-0.6504	0.915352	0.710601	0.367651	0.367651	4	4	8	0.913931	-0.129843
Titin	Ttn	A2ASS6	3906	7	25	15	8	7	9	11	12	0.057	0.3009	1	0.513327	0.716426	0.513327	4	4	8	1.05866	0.0822336
Complement C3	C3	P01027	186	5	15	14	4	29	12	18	20	-0.492	-2.5246	0.006942	0.659581	0.000794	0.000794	4	4	8	0.611402	-0.709806
Cytochrome c oxidase subunit NDUFA4	Ndufa4	Q62425	9	20	24	18	32	21	31	16	26	0.186	1.2375	0.458798	0.125219	0.758556	0.125219	4	4	8	1.20442	0.268341
Dihydrolipoyl dehydrogenase, mitochondrial	Dld	O08749	54	13	29	18	30	25	42	16	34	0.399	2.9218	0.001164	0.000164	0.656958	0.000164	4	4	8	1.49033	0.575635
Creatine kinase M-type	Ckm	P07310	43	13	21	19	24	19	24	15	22	0.084	0.5143	0.977036	0.424311	0.747208	0.424311	4	4	8	1.08763	0.121186
14-3-3 protein eta	Ywhah	P68510	28	0	0	0	15	0	0	0	16	1.598	3.5274	3.5e-05	4e-06	0.644245	4e-06	0	2	2	4.94314	2.30543
Triosephosphate isomerase	Tpi1	P17751	27	26	26	22	23	33	25	22	26	-0.262	-1.9345	0.083285	0.67736	0.012623	0.012623	4	4	8	0.769511	-0.377986
Cytochrome c oxidase subunit 4 isoform 1, mitochondrial	Cox4i1	P19783	20	16	23	25	34	23	32	14	31	0.216	1.5042	0.250601	0.064148	0.73663	0.064148	4	4	8	1.2411	0.311622
Cullin-1	Cul1	Q9WTX6	90	13	16	32	20	41	28	24	20	-0.476	-3.3213	9.9e-05	0.647176	5e-06	5e-06	4	4	8	0.621263	-0.686723
Tubulin alpha-4A chain	Tuba4a	P68368	50	28	0	0	13	0	0	10	12	-0.654	-2.5912	0.005097	0.658045	0.000554	0.000554	2	2	4	0.519962	-0.943523
Malate dehydrogenase, mitochondrial	Mdh2	P08249	36	13	33	18	26	25	30	26	35	0.17	1.2903	0.409833	0.110687	0.754752	0.110687	4	4	8	1.1853	0.245258
Methylcrotonoyl-CoA carboxylase subunit alpha, mitochondrial	Mccc1	Q99MR8	79	3	27	19	27	17	34	16	32	0.559	3.4777	4.9e-05	5e-06	0.644988	5e-06	4	4	8	1.74892	0.806467
Caveolae-associated protein 1	Cavin1	O54724	44	19	25	23	14	21	34	18	29	-0.006	-0.0393	0.99835	0.619194	0.635185	0.635185	4	4	8	0.994018	-0.00865617
14-3-3 protein sigma	Sfn	O70456	28	17	0	6	0	0	0	11	0	-2.147	-4.7522	0	0.637242	0	0	3	0	3	0.116834	-3.09747
Tubulin beta-5 chain	Tubb5	P99024	50	10	0	0	19	9	0	10	21	0.061	0.2593	1	0.5288	0.708765	0.5288	3	2	5	1.0629	0.0880044
Protein NipSnap homolog 2	Nipsnap2	O55126	33	15	27	16	20	23	24	23	25	-0.009	-0.0569	0.998419	0.623421	0.629712	0.629712	4	4	8	0.99104	-0.0129843
Desmin	Des	P31001	53	16	27	18	14	8	10	11	15	-0.024	-0.1325	0.999613	0.640331	0.60456	0.60456	4	4	8	0.976286	-0.0346247
NADH dehydrogenase [ubiquinone] iron-sulfur protein 2, mitochondrial	Ndufs2	Q91WD5	53	12	24	12	29	20	34	16	35	0.471	3.1779	0.000295	3.6e-05	0.650356	3.6e-05	4	4	8	1.60159	0.679509
Hydroxyacyl-coenzyme A dehydrogenase, mitochondrial	Hadh	Q61425	34	16	28	19	24	22	28	21	27	0.085	0.5377	0.972131	0.413789	0.74974	0.413789	4	4	8	1.08872	0.122629
ATP synthase subunit e, mitochondrial	Atp5me	Q06185	8	16	20	19	29	26	19	20	24	-0.087	-0.5979	0.948692	0.706904	0.394595	0.394595	4	4	8	0.916677	-0.125514
Calsequestrin-2	Casq2	O09161	48	9	24	13	23	13	28	17	30	0.471	2.746	0.002972	0.000428	0.662589	0.000428	4	4	8	1.60159	0.679509
Basement membrane-specific heparan sulfate proteoglycan core protein	Hspg2	Q05793	398	12	36	29	15	18	17	23	19	-0.178	-1.1557	0.48818	0.711556	0.146723	0.146723	4	4	8	0.836942	-0.2568
NADH dehydrogenase [ubiquinone] 1 alpha subcomplex subunit 8	Ndufa8	Q9DCJ5	20	13	16	25	25	23	22	15	28	-0.044	-0.3105	1	0.672852	0.534559	0.534559	4	4	8	0.956954	-0.0634786
40S ribosomal protein S19	Rps19	Q9CZX8	16	17	22	22	19	22	26	24	18	-0.214	-1.4378	0.294102	0.698672	0.071008	0.071008	4	4	8	0.807348	-0.308737
Sodium/potassium-transporting ATPase subunit alpha-2	Atp1a2	Q6PIE5	112	0	0	0	14	15	16	0	17	0.771	2.8119	0.002096	0.000301	0.660388	0.000301	1	3	4	2.16193	1.11232
Tubulin beta-2A chain	Tubb2a	Q7TMM9	50	10	0	0	0	0	0	0	0	-1.255	-2.5302	0.006765	0.659447	0.000771	0.000771	1	0	1	0.285076	-1.81058
Ig kappa chain V-V region HP R16.7	NA	P01644	12	9	12	22	22	18	18	21	21	-0.183	-1.0925	0.538877	0.713832	0.168763	0.168763	4	4	8	0.832768	-0.264013
Protein 4.1	Epb41	P48193	96	14	35	30	13	13	8	18	30	-0.109	-0.7687	0.822359	0.715955	0.308317	0.308317	4	4	8	0.89673	-0.157254
Heat shock 70 kDa protein 4	Hspa4	Q61316	94	13	17	24	13	26	23	22	21	-0.373	-2.4206	0.011184	0.662203	0.001363	0.001363	4	4	8	0.688665	-0.538125
L-lactate dehydrogenase B chain	Ldhb	P16125	37	12	19	11	17	20	21	14	25	0.132	0.7583	0.892383	0.3117	0.766149	0.3117	4	4	8	1.14111	0.190436
Heat shock protein HSP 90-alpha	Hsp90aa1	P07901	85	2	0	11	12	11	14	8	37	0.423	2.0693	0.054581	0.009931	0.692551	0.009931	4	3	7	1.52653	0.61026
Elongation factor 2	Eef2	P58252	95	18	16	22	17	22	21	7	33	0.013	0.0793	1	0.587586	0.668633	0.587586	4	4	8	1.01308	0.018755
Filamin-C	Flnc	Q8VHX6	291	12	33	16	27	18	16	21	13	0.062	0.3862	0.996665	0.479489	0.730441	0.479489	4	4	8	1.06396	0.0894471
Isocitrate dehydrogenase [NAD] subunit gamma 1, mitochondrial	Idh3g	P70404	43	12	22	13	22	21	29	14	27	0.278	1.7136	0.149524	0.034753	0.718218	0.034753	4	4	8	1.32049	0.401069
Myosin regulatory light chain 2, ventricular/cardiac muscle isoform	Myl2	P51667	19	19	20	20	26	18	20	17	19	-0.084	-0.5222	0.984317	0.700115	0.43342	0.43342	4	4	8	0.919431	-0.121186
F-box/WD repeat-containing protein 5	Fbxw5	Q9QXW2	65	6	16	28	15	22	19	22	17	-0.38	-2.1555	0.036132	0.669929	0.004875	0.004875	4	4	8	0.683861	-0.548224
Protein-glutamine gamma-glutamyltransferase K	Tgm1	Q9JLF6	90	21	19	25	21	27	6	17	5	-0.774	-4.5649	0	0.638432	0	0	4	4	8	0.461165	-1.11665
Y-box-binding protein 1	Ybx1	P62960	36	13	17	11	19	28	27	18	25	0.001	0.0037	0.999456	0.608373	0.647995	0.608373	4	4	8	1.001	0.0014427
Desmoglein-1-beta	Dsg1b	Q7TSF1	114	21	29	9	20	23	6	24	4	-0.512	-3.1487	0.00027	0.648934	1.8e-05	1.8e-05	4	4	8	0.599296	-0.73866
Protein-glutamine gamma-glutamyltransferase 2	Tgm2	P21981	77	6	25	20	20	14	16	16	22	0.16	0.9653	0.735569	0.220538	0.769766	0.220538	4	4	8	1.17351	0.230831
Cytochrome c oxidase subunit 6C	Cox6c	Q9CPQ1	8	12	22	17	24	20	24	16	21	0.099	0.6022	0.955749	0.384291	0.755911	0.384291	4	4	8	1.10407	0.142827
40S ribosomal protein S4, X isoform	Rps4x	P62702	30	15	18	16	16	19	15	14	22	-0.117	-0.7026	0.876906	0.71346	0.341143	0.341143	4	4	8	0.889585	-0.168795
NADH dehydrogenase [ubiquinone] 1 alpha subcomplex subunit 6	Ndufa6	Q9CQZ5	15	12	21	15	25	13	27	13	23	0.375	2.1356	0.043933	0.007618	0.688721	0.007618	4	4	8	1.45499	0.541011
Fibrillin-1	Fbn1	Q61554	312	11	32	37	12	5	0	23	29	-0.279	-1.6434	0.188499	0.689028	0.037336	0.037336	4	3	7	0.75654	-0.402512
Apoptosis-inducing factor 1, mitochondrial	Aifm1	Q9Z0X1	67	6	19	16	24	22	22	16	23	0.155	0.9046	0.79036	0.246039	0.769871	0.246039	4	4	8	1.16766	0.223618
NADH dehydrogenase [ubiquinone] iron-sulfur protein 7, mitochondrial	Ndufs7	Q9DC70	25	11	16	14	13	14	18	17	16	-0.12	-0.654	0.912856	0.710824	0.365811	0.365811	4	4	8	0.88692	-0.173123
Mitochondrial carnitine/acylcarnitine carrier protein	Slc25a20	Q9Z2Z6	33	14	18	14	15	15	23	17	18	-0.021	-0.1265	0.999343	0.639059	0.606655	0.606655	4	4	8	0.979219	-0.0302966
Ig kappa chain V19-17	Igk-V19-17	P01633	16	9	7	10	12	9	10	14	14	-0.212	-0.957	0.654788	0.717089	0.222094	0.222094	4	4	8	0.808965	-0.305851
Pyruvate kinase PKM	Pkm	P52480	58	17	7	10	8	8	11	6	28	0.039	0.1893	1	0.553241	0.694568	0.553241	4	4	8	1.03977	0.0562651
Myomesin-1	Myom1	Q62234	185	3	19	11	17	13	25	15	34	0.565	3.0845	0.000487	6.4e-05	0.652521	6.4e-05	4	4	8	1.75945	0.815123
Keratin, type II cuticular Hb2	Krt82	Q99M74	57	21	16	13	15	11	3	14	8	-0.567	-2.7806	0.002028	0.65428	0.000188	0.000188	4	4	8	0.567225	-0.818008
Myosin light polypeptide 6	Myl6	Q60605	17	20	17	23	14	9	9	12	28	-0.196	-1.1481	0.494158	0.711849	0.149277	0.149277	4	4	8	0.822012	-0.282768
Serine/arginine repetitive matrix protein 2	Srrm2	Q8BTI8	295	0	0	0	0	5	0	0	0	-0.863	-1.5757	0.220072	0.692104	0.046658	0.046658	1	0	1	0.421894	-1.24505
Hexokinase-1	Hk1	P17710	108	14	16	9	13	19	22	11	21	0.058	0.3301	1	0.502051	0.721477	0.502051	4	4	8	1.05971	0.0836763
Histone H4	H4c1	P62806	11	31	12	11	20	13	8	12	20	-0.336	-2.0441	0.056327	0.673554	0.007977	0.007977	4	4	8	0.714623	-0.484746
Alpha-actinin-1	Actn1	Q7TPR4	103	0	0	0	0	0	21	0	23	1.802	4.2831	0	0	0.636361	0	0	2	2	6.06176	2.59974
Kinesin-like protein KIF27	Kif27	Q7M6Z4	159	12	14	9	4	7	4	11	0	-0.746	-2.9342	0.000895	0.651774	7.4e-05	7.4e-05	4	3	7	0.47426	-1.07625
NADH dehydrogenase [ubiquinone] 1 alpha subcomplex subunit 13	Ndufa13	Q9ERS2	17	12	16	11	23	9	21	11	15	0.323	1.7752	0.127429	0.028538	0.713161	0.028538	4	4	8	1.38127	0.46599
Tripartite motif-containing protein 72	Trim72	Q1XH17	53	17	20	11	13	11	20	11	19	0.125	0.7006	0.920548	0.338513	0.763125	0.338513	4	4	8	1.13315	0.180337
Tropomyosin alpha-3 chain	Tpm3	P21107	33	8	0	0	0	0	0	0	7	-0.318	-0.7928	0.80145	0.716568	0.296622	0.296622	1	1	2	0.727603	-0.458777
Propionyl-CoA carboxylase alpha chain, mitochondrial	Pcca	Q91ZA3	80	0	17	9	18	16	25	14	21	0.46	2.5155	0.009484	0.001384	0.67107	0.001384	3	4	7	1.58407	0.66364
40S ribosomal protein S3a	Rps3a	P97351	30	17	20	20	12	17	16	15	12	-0.367	-2.1947	0.030621	0.668705	0.004074	0.004074	4	4	8	0.69281	-0.529469
Collagen alpha-1(VI) chain	Col6a1	Q04857	108	12	28	21	11	11	7	16	17	-0.197	-1.0283	0.592699	0.715698	0.193026	0.193026	4	4	8	0.821191	-0.284211
Aspartate aminotransferase, mitochondrial	Got2	P05202	47	11	16	18	16	18	21	14	20	-0.043	-0.2595	1	0.664519	0.556141	0.556141	4	4	8	0.957911	-0.0620359
Acetyl-coenzyme A synthetase 2-like, mitochondrial	Acss1	Q99NB1	75	4	18	13	19	18	24	14	23	0.308	1.7476	0.136971	0.031203	0.715398	0.031203	4	4	8	1.3607	0.44435
Junctophilin-2	Jph2	Q9ET78	75	9	15	16	14	20	16	14	21	-0.131	-0.7657	0.824928	0.715868	0.309784	0.309784	4	4	8	0.877218	-0.188993
NADH dehydrogenase [ubiquinone] 1 alpha subcomplex subunit 2	Ndufa2	Q9CQ75	11	8	9	12	16	14	18	10	12	0.026	0.1248	1	0.573977	0.679927	0.573977	4	4	8	1.02634	0.0375101
L-lactate dehydrogenase A chain	Ldha	P06151	36	11	10	11	9	5	13	8	9	-0.069	-0.2982	1	0.67091	0.539873	0.539873	4	4	8	0.933327	-0.099546
SRA stem-loop-interacting RNA-binding protein, mitochondrial	Slirp	Q9D8T7	13	13	13	14	15	15	14	10	15	-0.128	-0.6586	0.909651	0.711103	0.363462	0.363462	4	4	8	0.879853	-0.184665
Ig gamma-2A chain C region, membrane-bound form	Igh-1a	P01865	44	0	0	0	7	0	10	0	6	1.337	2.8628	0.001597	0.000228	0.65876	0.000228	0	3	3	3.8076	1.92888
60S ribosomal protein L30	Rpl30	P62889	13	9	13	9	15	15	16	8	15	0.135	0.7101	0.916294	0.334085	0.763683	0.334085	4	4	8	1.14454	0.194764
MICOS complex subunit Mic19	Chchd3	Q9CRB9	26	14	18	13	11	16	14	14	12	-0.252	-1.4117	0.309675	0.699938	0.076498	0.076498	4	4	8	0.777245	-0.363559
Peroxiredoxin-1	Prdx1	P35700	22	15	17	11	15	16	12	10	15	-0.106	-0.526	0.982848	0.700497	0.431483	0.431483	4	4	8	0.899425	-0.152926
Cytochrome c oxidase subunit 5B, mitochondrial	Cox5b	P19536	14	6	12	7	19	16	23	14	25	0.373	1.9856	0.070695	0.013682	0.697801	0.013682	4	4	8	1.45208	0.538125
Peroxiredoxin-6	Prdx6	O08709	25	15	24	8	10	20	16	15	11	-0.187	-1.0549	0.570133	0.714988	0.182748	0.182748	4	4	8	0.829444	-0.269784
Mitochondrial pyruvate carrier 2	Mpc2	Q9D023	14	10	15	10	16	17	24	10	22	0.247	1.368	0.344585	0.091578	0.748541	0.091578	4	4	8	1.28018	0.356346
Lon protease homolog, mitochondrial	Lonp1	Q8CGK3	106	9	11	13	15	11	18	10	18	0.144	0.7226	0.910558	0.328264	0.764382	0.328264	4	4	8	1.15488	0.207748
Transitional endoplasmic reticulum ATPase	Vcp	Q01853	89	3	13	14	14	18	19	5	27	0.352	1.8895	0.093399	0.019377	0.704431	0.019377	4	4	8	1.42191	0.507829
NADH dehydrogenase [ubiquinone] 1 alpha subcomplex subunit 5	Ndufa5	Q9CPP6	13	7	15	7	19	16	17	5	17	0.43	2.0939	0.050438	0.009012	0.691097	0.009012	4	4	8	1.53726	0.620359
ATP-dependent 6-phosphofructokinase, liver type	Pfkl	P12382	85	0	8	0	7	0	8	0	8	1.559	3.6838	1.1e-05	1e-06	0.642049	1e-06	0	4	4	4.75406	2.24916
Troponin I, cardiac muscle	Tnni3	P48787	24	10	18	20	8	11	8	12	16	-0.296	-1.5051	0.256269	0.69543	0.058175	0.058175	4	4	8	0.743787	-0.427038
Nucleoside diphosphate kinase B	Nme2	Q01768	17	14	13	17	16	12	19	10	16	-0.039	-0.2052	1	0.654801	0.577783	0.577783	4	4	8	0.961751	-0.0562651
NADH dehydrogenase [ubiquinone] iron-sulfur protein 4, mitochondrial	Ndufs4	Q9CXZ1	20	5	7	7	8	12	10	7	15	0.036	0.1514	1	0.565632	0.686153	0.565632	4	4	8	1.03666	0.051937
Citrate synthase, mitochondrial	Cs	Q9CZU6	52	7	18	8	19	17	21	13	18	0.291	1.5378	0.231197	0.058465	0.733614	0.058465	4	4	8	1.33776	0.419824
Clathrin heavy chain 1	Cltc	Q68FD5	192	0	13	11	18	4	18	11	19	0.669	3.0778	0.000505	6.6e-05	0.652687	6.6e-05	3	4	7	1.95228	0.965163
Enoyl-CoA hydratase, mitochondrial	Echs1	Q8BH95	31	10	14	10	10	11	13	13	14	-0.097	-0.4712	0.99771	0.694591	0.45918	0.45918	4	4	8	0.907556	-0.139941
Heat shock 70 kDa protein 4L	Hspa4l	P48722	94	10	7	15	11	28	14	15	9	-0.72	-3.6221	1.2e-05	0.644841	1e-06	1e-06	4	4	8	0.486752	-1.03874
Peroxiredoxin-2	Prdx2	Q61171	22	12	12	10	12	8	10	9	10	-0.128	-0.5795	0.958516	0.705412	0.404058	0.404058	4	4	8	0.879853	-0.184665
Ig kappa chain V-III region PC 6684	NA	P01670	12	4	0	20	12	11	8	16	12	-0.644	-2.8773	0.00122	0.652654	0.000105	0.000105	4	3	7	0.525187	-0.929096
Ig heavy chain V-III region J606	NA	P01801	13	3	9	18	13	25	18	10	8	-0.341	-1.715	0.158174	0.68592	0.02914	0.02914	4	4	8	0.711059	-0.491959
Fatty acid-binding protein, heart	Fabp3	P11404	15	5	10	11	16	20	12	9	6	-0.225	-1.0482	0.575782	0.715176	0.185307	0.185307	4	4	8	0.798516	-0.324606
Superoxide dismutase [Mn], mitochondrial	Sod2	P09671	25	6	15	11	15	13	19	10	15	0.248	1.1451	0.551521	0.153774	0.764124	0.153774	4	4	8	1.28146	0.357788
40S ribosomal protein S2	Rps2	P25444	31	6	7	11	14	14	15	9	14	0.01	0.0456	1	0.59713	0.659729	0.59713	4	4	8	1.01005	0.014427
40S ribosomal protein S11	Rps11	P62281	18	10	12	14	12	16	14	8	18	-0.053	-0.2735	1	0.666881	0.550338	0.550338	4	4	8	0.94838	-0.0764628
Pregnancy zone protein	Pzp	Q61838	166	3	11	0	8	9	16	19	24	0.344	1.5817	0.207833	0.05163	0.729684	0.05163	3	4	7	1.41058	0.496287
Voltage-dependent anion-selective channel protein 2	Vdac2	Q60930	32	4	11	7	10	6	11	7	12	0.382	1.5504	0.224277	0.056434	0.732483	0.056434	4	4	8	1.46521	0.55111
Plakophilin-1	Pkp1	P97350	81	16	9	13	15	8	2	15	3	-0.808	-3.4947	3.2e-05	0.645764	1e-06	1e-06	4	4	8	0.445749	-1.1657
Vinculin	Vcl	Q64727	117	7	18	23	10	7	3	6	19	-0.097	-0.4767	0.997051	0.695221	0.45643	0.45643	4	4	8	0.907556	-0.139941
Carnitine O-acetyltransferase	Crat	P47934	71	3	9	12	9	16	14	9	12	-0.126	-0.6008	0.946965	0.70713	0.393103	0.393103	4	4	8	0.881615	-0.18178
Ig heavy chain V region 441	NA	P01806	13	6	9	8	6	15	16	11	9	-0.226	-0.9566	0.655142	0.717095	0.222263	0.222263	4	4	8	0.797718	-0.326049
Cytochrome c oxidase subunit 2	Mtco2	P00405	26	6	16	9	10	9	19	7	12	0.366	1.7234	0.145812	0.0337	0.717399	0.0337	4	4	8	1.44196	0.528026
Bifunctional glutamate/proline--tRNA ligase	Eprs1	Q8CGC7	170	0	7	6	10	4	10	6	11	0.551	1.9865	0.070503	0.013636	0.697742	0.013636	3	4	7	1.73499	0.794925
60S ribosomal protein L26	Rpl26	P61255	17	4	9	9	14	12	16	8	19	0.333	1.6021	0.197715	0.048671	0.727869	0.048671	4	4	8	1.39515	0.480417
Histone H3.3C	H3-5	P02301	15	11	7	6	7	3	8	6	10	-0.047	-0.183	1	0.650564	0.586225	0.586225	4	4	8	0.954087	-0.0678067
Fatty acid-binding protein, adipocyte	Fabp4	P04117	15	8	10	9	16	14	14	11	12	-0.027	-0.1277	0.999403	0.639315	0.606238	0.606238	4	4	8	0.973361	-0.0389528
NADH dehydrogenase [ubiquinone] iron-sulfur protein 8, mitochondrial	Ndufs8	Q8K3J1	24	10	14	10	12	8	21	7	15	0.316	1.5749	0.21131	0.052647	0.730291	0.052647	4	4	8	1.37163	0.455892
Protein phosphatase 1 regulatory subunit 3A	Ppp1r3a	Q99MR9	121	0	5	0	27	0	31	0	26	2.402	6.2015	0	0	0.632141	0	0	4	4	11.0452	3.46535
40S ribosomal protein S16	Rps16	P14131	16	8	10	15	12	11	16	6	16	0.069	0.3348	0.999963	0.500206	0.722266	0.500206	4	4	8	1.07144	0.099546
CDGSH iron-sulfur domain-containing protein 1	Cisd1	Q91WS0	12	11	14	12	18	10	17	10	11	0.125	0.6315	0.94671	0.370715	0.758333	0.370715	4	4	8	1.13315	0.180337
40S ribosomal protein S3	Rps3	P62908	27	12	14	13	10	8	10	15	13	-0.269	-1.2943	0.385872	0.705554	0.104938	0.104938	4	4	8	0.764143	-0.388085
Ig lambda-1 chain C region	NA	P01843	12	6	5	8	6	16	16	16	13	-0.343	-1.5781	0.218905	0.691993	0.046299	0.046299	4	4	8	0.709638	-0.494844
GrpE protein homolog 1, mitochondrial	Grpel1	Q99LP6	24	10	13	8	8	17	12	15	13	-0.323	-1.5754	0.220219	0.692118	0.046702	0.046702	4	4	8	0.723974	-0.46599
3-hydroxyacyl-CoA dehydrogenase type-2	Hsd17b10	O08756	27	6	18	5	12	7	26	6	19	0.861	3.6789	1.2e-05	1e-06	0.642115	1e-06	4	4	8	2.36553	1.24216
60S ribosomal protein L6	Rpl6	P47911	34	5	13	13	8	13	15	11	13	-0.066	-0.3061	1	0.672162	0.536468	0.536468	4	4	8	0.936131	-0.0952179
Histone H2B type 1-H	H2bc9	Q64478	14	13	7	9	18	8	6	8	14	-0.067	-0.3038	1	0.671799	0.537462	0.537462	4	4	8	0.935195	-0.0966606
60S ribosomal protein L8	Rpl8	P62918	28	11	9	11	8	10	9	11	12	-0.348	-1.6803	0.172491	0.687406	0.032911	0.032911	4	4	8	0.706099	-0.502058
NADH dehydrogenase [ubiquinone] flavoprotein 2, mitochondrial	Ndufv2	Q9D6J6	27	5	14	7	13	11	18	5	15	0.511	2.239	0.030504	0.004938	0.683272	0.004938	4	4	8	1.66696	0.737217
Ig kappa chain V-V region MOPC 173	NA	P01643	12	0	0	10	0	0	0	0	0	-1.192	-2.2832	0.020804	0.666042	0.002687	0.002687	1	0	1	0.303613	-1.71969
NADH dehydrogenase [ubiquinone] 1 beta subcomplex subunit 4	Ndufb4	Q9CQC7	15	6	12	13	15	9	12	10	14	0.105	0.5004	0.979783	0.430506	0.745629	0.430506	4	4	8	1.11071	0.151483
ATP synthase subunit epsilon, mitochondrial	Atp5f1e	P56382	6	10	10	10	14	10	16	8	8	0.01	0.0468	1	0.596798	0.660054	0.596798	4	4	8	1.01005	0.014427
Cytochrome c oxidase subunit 5A, mitochondrial	Cox5a	P12787	16	10	10	11	11	9	13	8	9	-0.093	-0.4022	1	0.686049	0.492822	0.492822	4	4	8	0.911194	-0.134171
Ig kappa chain V-VI region TEPC 601/TEPC 191	NA	P01677	12	8	8	5	8	9	11	6	7	-0.04	-0.1614	1	0.646288	0.594218	0.594218	4	4	8	0.960789	-0.0577078
Prelamin-A/C	Lmna	P48678	74	31	16	12	4	3	0	4	17	-0.533	-2.5147	0.007266	0.659819	0.000837	0.000837	4	3	7	0.586842	-0.768956
Protein-glutamine gamma-glutamyltransferase E	Tgm3	Q08189	77	3	12	3	0	9	3	0	0	-0.203	-0.5947	0.950471	0.706652	0.396241	0.396241	3	2	5	0.816278	-0.292867
Acidic leucine-rich nuclear phosphoprotein 32 family member B	Anp32b	Q9EST5	31	11	12	11	11	13	8	8	9	-0.277	-1.2291	0.432407	0.708509	0.12347	0.12347	4	4	8	0.758054	-0.399627
Transcription factor A, mitochondrial	Tfam	P40630	28	13	15	16	10	9	9	7	11	-0.237	-1.114	0.521373	0.713102	0.16106	0.16106	4	4	8	0.788991	-0.341919
Peroxiredoxin-5, mitochondrial	Prdx5	P99029	22	11	10	14	11	12	14	8	14	-0.135	-0.6808	0.893544	0.712363	0.352164	0.352164	4	4	8	0.873716	-0.194764
Acidic leucine-rich nuclear phosphoprotein 32 family member A	Anp32a	O35381	29	13	10	8	7	6	4	6	0	-0.611	-2.3687	0.014162	0.663606	0.00177	0.00177	4	3	7	0.542808	-0.881487
Malate dehydrogenase, cytoplasmic	Mdh1	P14152	37	6	11	11	9	12	11	14	12	-0.248	-1.1543	0.489279	0.71161	0.147192	0.147192	4	4	8	0.78036	-0.357788
NADH dehydrogenase [ubiquinone] iron-sulfur protein 3, mitochondrial	Ndufs3	Q9DCT2	30	8	17	6	13	7	16	11	12	0.351	1.5789	0.209252	0.052048	0.729934	0.052048	4	4	8	1.42049	0.506386
Ferritin heavy chain	Fth1	P09528	21	8	12	11	14	11	15	10	12	0.056	0.2884	1	0.518047	0.714181	0.518047	4	4	8	1.0576	0.0807909
Collagen alpha-2(VI) chain	Col6a2	Q02788	110	9	17	16	9	6	8	9	8	-0.165	-0.7629	0.827322	0.715785	0.311155	0.311155	4	4	8	0.847894	-0.238045
Gamma-enolase	Eno2	P17183	47	0	0	0	5	0	0	0	6	0.715	1.4548	0.281789	0.073254	0.741036	0.073254	0	2	2	2.04419	1.03153
Ig kappa chain V-II region 26-10	NA	P01631	12	7	6	10	11	8	10	11	10	-0.182	-0.7824	0.810569	0.716323	0.30165	0.30165	4	4	8	0.833601	-0.26257
NADH dehydrogenase [ubiquinone] iron-sulfur protein 6, mitochondrial	Ndufs6	P52503	13	4	13	3	11	11	17	10	12	0.408	1.7409	0.139373	0.031878	0.715949	0.031878	4	4	8	1.50381	0.58862
40S ribosomal protein S7	Rps7	P62082	22	5	8	11	12	10	12	12	11	-0.089	-0.443	1	0.691239	0.473135	0.473135	4	4	8	0.914846	-0.1284
Fumarate hydratase, mitochondrial	Fh	P97807	54	5	14	8	12	7	12	11	11	0.213	0.9547	0.745719	0.224898	0.769853	0.224898	4	4	8	1.23738	0.307294
Pyruvate dehydrogenase protein X component, mitochondrial	Pdhx	Q8BKZ9	54	7	7	5	8	10	12	9	11	-0.031	-0.1334	0.999648	0.640521	0.604244	0.604244	4	4	8	0.969476	-0.0447235
40S ribosomal protein S29	Rps29	P62274	7	11	10	12	9	11	6	11	8	-0.544	-2.5463	0.00628	0.659068	0.000707	0.000707	4	4	8	0.580422	-0.784826
Caveolae-associated protein 4	Cavin4	A2AMM0	41	9	12	10	11	10	10	12	13	-0.109	-0.5097	0.988501	0.698831	0.439779	0.439779	4	4	8	0.89673	-0.157254
Catalase	Cat	P24270	60	2	15	7	7	11	13	9	15	0.29	1.2699	0.428341	0.116149	0.756268	0.116149	4	4	8	1.33643	0.418382
ATP synthase subunit g, mitochondrial	Atp5mg	Q9CPQ8	11	8	10	11	16	9	14	9	11	0.082	0.3779	0.99756	0.482897	0.729178	0.482897	4	4	8	1.08546	0.118301
Ig kappa chain V-V region L6 (Fragment)	NA	P01638	13	9	8	9	7	9	9	10	10	-0.302	-1.2748	0.39946	0.706456	0.11027	0.11027	4	4	8	0.739338	-0.435694
CDGSH iron-sulfur domain-containing protein 3, mitochondrial	Cisd3	B1AR13	16	4	8	11	10	13	11	10	8	-0.231	-0.9994	0.617601	0.716358	0.204547	0.204547	4	4	8	0.793739	-0.333263
Isoleucine--tRNA ligase, mitochondrial	Iars2	Q8BIJ6	113	5	12	2	9	15	14	6	11	0.254	1.113	0.584991	0.164633	0.765673	0.164633	4	4	8	1.28917	0.366445
Ig heavy chain V region 102	NA	P01750	13	0	4	7	7	0	8	4	7	0.438	1.3241	0.380395	0.102049	0.752128	0.102049	2	4	6	1.5496	0.6319
Methylcrotonoyl-CoA carboxylase beta chain, mitochondrial	Mccc2	Q3ULD5	61	0	17	4	14	7	19	7	15	0.957	3.6	2.1e-05	2e-06	0.6432	2e-06	3	4	7	2.60387	1.38066
40S ribosomal protein S20	Rps20	P60867	13	10	8	11	14	7	13	6	13	0.109	0.5067	0.978514	0.427703	0.746351	0.427703	4	4	8	1.11516	0.157254
60S ribosomal protein L12	Rpl12	P35979	18	7	9	8	9	13	12	6	13	0.004	0.0187	0.99995	0.604427	0.652281	0.604427	4	4	8	1.00401	0.00577078
60S ribosomal protein L10-like	Rpl10l	P86048	25	5	8	10	9	8	8	5	14	0.122	0.5314	0.973531	0.416633	0.749074	0.416633	4	4	8	1.12975	0.176009
Adenylate kinase isoenzyme 1	Ak1	Q9R0Y5	22	7	12	9	12	11	15	4	14	0.31	1.3096	0.392841	0.105692	0.753269	0.105692	4	4	8	1.36343	0.447235
Histone H2A type 2-C	H2ac20	Q64523	14	10	2	7	5	5	2	4	10	-0.567	-1.9001	0.093211	0.678612	0.014498	0.014498	4	4	8	0.567225	-0.818008
Dynamin-like 120 kDa protein, mitochondrial	Opa1	P58281	111	4	5	7	9	10	14	7	8	0.009	0.038	1	0.599221	0.657654	0.599221	4	4	8	1.00904	0.0129843
Ferrochelatase, mitochondrial	Fech	P22315	47	7	15	7	9	8	13	8	13	0.261	1.1102	0.587936	0.165603	0.765798	0.165603	4	4	8	1.29823	0.376543
Voltage-dependent anion-selective channel protein 1	Vdac1	Q60932	32	2	5	9	4	4	6	5	9	-0.062	-0.2083	1	0.65538	0.576585	0.576585	4	4	8	0.939883	-0.0894471
Cytochrome c, somatic	Cycs	P62897	12	2	9	9	18	12	15	5	7	0.347	1.4816	0.264495	0.068198	0.738652	0.068198	4	4	8	1.41482	0.500615
AFG3-like protein 2	Afg3l2	Q8JZQ2	90	0	9	3	12	11	10	5	13	0.584	2.2158	0.033201	0.005453	0.684443	0.005453	3	4	7	1.7932	0.842534
Ig heavy chain V region 1-72	Ighv1-72	P06328	13	3	4	11	7	4	4	4	8	-0.182	-0.601	0.946845	0.707146	0.393	0.393	4	4	8	0.833601	-0.26257
Ig kappa chain V-V region K2 (Fragment)	NA	P01635	13	3	6	14	14	11	10	7	9	-0.088	-0.3939	1	0.684944	0.496747	0.496747	4	4	8	0.915761	-0.126957
60S ribosomal protein L27	Rpl27	P61358	16	7	7	11	8	7	12	6	11	-0.009	-0.0387	0.998379	0.619048	0.63537	0.63537	4	4	8	0.99104	-0.0129843
Dehydrogenase/reductase SDR family member 4	Dhrs4	Q99LB2	30	7	8	7	9	7	9	14	11	-0.18	-0.7577	0.831759	0.715624	0.313707	0.313707	4	4	8	0.83527	-0.259685
Ubiquitin-like modifier-activating enzyme 1	Uba1	Q02053	118	2	11	9	7	14	11	9	17	0.054	0.239	1	0.536094	0.704823	0.536094	4	4	8	1.05548	0.0779055
Troponin T, cardiac muscle	Tnnt2	P50752	36	7	11	14	8	4	6	9	15	-0.079	-0.3459	1	0.678208	0.51888	0.51888	4	4	8	0.92404	-0.113973
Annexin A6	Anxa6	P14824	76	0	12	6	13	12	11	10	16	0.328	1.4553	0.281457	0.073157	0.740992	0.073157	3	4	7	1.38819	0.473204
Adhesion G-protein coupled receptor V1	Adgrv1	Q8VHN7	687	3	0	2	0	0	0	0	0	-0.729	-1.3334	0.359394	0.703711	0.094773	0.094773	2	0	2	0.482391	-1.05172
Ig kappa chain V region Mem5 (Fragment)	NA	P84750	13	0	0	0	2	6	2	0	3	-0.343	-0.7421	0.844949	0.715098	0.321406	0.321406	1	3	4	0.709638	-0.494844
Four and a half LIM domains protein 1	Fhl1	P97447	32	7	8	12	6	9	7	13	9	-0.544	-2.2827	0.020851	0.666056	0.002693	0.002693	4	4	8	0.580422	-0.784826
60S ribosomal protein L11	Rpl11	Q9CXW4	20	6	9	8	11	9	10	5	13	0.189	0.747	0.898348	0.31693	0.765626	0.31693	4	4	8	1.20804	0.272669
Filamin-A	Flna	Q8BTM8	281	0	16	7	8	6	6	6	5	0.318	1.1574	0.538784	0.149742	0.763474	0.149742	3	4	7	1.37438	0.458777
Phospholipid hydroperoxide glutathione peroxidase	Gpx4	O70325	22	8	9	9	8	12	12	2	8	-0.046	-0.196	1	0.653063	0.58131	0.58131	4	4	8	0.955042	-0.066364
28S ribosomal protein S22, mitochondrial	Mrps22	Q9CXW2	41	3	0	3	4	2	5	3	7	0.128	0.3711	0.998199	0.485672	0.728126	0.485672	4	3	7	1.13655	0.184665
F-box only protein 50	Nccrp1	G3X9C2	30	4	5	4	7	9	4	3	3	-0.265	-0.8375	0.761806	0.717312	0.275392	0.275392	4	4	8	0.767206	-0.382314
Chloride intracellular channel protein 4	Clic4	Q9QYB1	29	0	2	0	2	0	2	0	2	0.296	0.5518	0.968893	0.407398	0.751189	0.407398	0	4	4	1.34447	0.427038
Ig kappa chain V-V region MOPC 21	NA	P01634	15	3	0	3	3	3	3	3	0	-0.577	-1.3538	0.345972	0.702735	0.089743	0.089743	4	2	6	0.561581	-0.832435
40S ribosomal protein S13	Rps13	P62301	17	3	13	12	11	13	10	5	6	0.001	0.0059	0.999559	0.6078	0.64863	0.6078	4	4	8	1.001	0.0014427
Carbonyl reductase family member 4	Cbr4	Q91VT4	25	10	11	5	10	9	10	10	8	-0.102	-0.4429	1	0.691227	0.473184	0.473184	4	4	8	0.90303	-0.147155
60S ribosomal protein L7a	Rpl7a	P12970	30	0	5	12	6	12	13	10	10	-0.253	-1.0446	0.578828	0.715274	0.186691	0.186691	3	4	7	0.776468	-0.365002
Elongin-B	Elob	P62869	13	8	9	11	11	11	10	5	10	-0.102	-0.4681	0.998067	0.694232	0.460726	0.460726	4	4	8	0.90303	-0.147155
Lipoamide acyltransferase component of branched-chain alpha-keto acid dehydrogenase complex, mitochondrial	Dbt	P53395	53	5	8	7	11	11	14	5	11	0.207	0.8463	0.836481	0.271624	0.769065	0.271624	4	4	8	1.22998	0.298638
Ig lambda-2 chain C region	Iglc2	P01844	11	6	4	12	8	12	7	11	9	-0.597	-2.3868	0.013046	0.66311	0.001617	0.001617	4	4	8	0.550461	-0.861289
Arginase-1	Arg1	Q61176	35	6	3	4	5	9	3	3	0	-0.768	-2.2256	0.026804	0.66776	0.003529	0.003529	4	3	7	0.46394	-1.10799
ADP-ribosylation factor 3	Arf3	P61205	21	6	7	6	10	4	12	2	8	0.476	1.6505	0.175367	0.042181	0.723615	0.042181	4	4	8	1.60962	0.686723
Ig kappa chain V-III region PC 7043	NA	P01665	12	0	0	8	7	5	6	11	12	-0.191	-0.6957	0.882209	0.713128	0.344622	0.344622	3	3	6	0.826133	-0.275555
40S ribosomal protein S15a	Rps15a	P62245	15	6	8	7	8	9	7	6	12	-0.011	-0.0433	0.998139	0.620163	0.633952	0.633952	4	4	8	0.98906	-0.0158696
CD5 antigen-like	Cd5l	Q9QWK4	39	3	8	12	5	8	7	13	8	-0.474	-1.8913	0.095888	0.678938	0.015016	0.015016	4	4	8	0.622507	-0.683837
Gasdermin-A	Gsdma	Q9EST1	50	8	6	5	3	5	0	2	0	-0.811	-2.233	0.025954	0.667536	0.003409	0.003409	4	2	6	0.444413	-1.17003
Parkinson disease protein 7 homolog	Park7	Q99LX0	20	5	10	9	9	8	9	8	10	0.013	0.0558	1	0.594288	0.662474	0.594288	4	4	8	1.01308	0.018755
Major vault protein	Mvp	Q9EQK5	96	5	12	6	13	5	11	4	13	0.641	2.4592	0.012315	0.001816	0.67334	0.001816	4	4	8	1.89838	0.924768
Biglycan	Bgn	P28653	42	4	9	9	5	8	10	6	9	-0.023	-0.0888	0.998472	0.630797	0.619427	0.619427	4	4	8	0.977262	-0.033182
Voltage-dependent anion-selective channel protein 3	Vdac3	Q60931	31	0	4	0	6	2	9	2	7	1.052	2.4792	0.011237	0.001649	0.672523	0.001649	2	4	6	2.86337	1.51772
60S ribosomal protein L15	Rpl15	Q9CZM2	24	2	4	5	4	14	10	4	12	-0.034	-0.1316	0.999577	0.640141	0.604875	0.604875	4	4	8	0.966572	-0.0490516
Ig heavy chain V region 36-65	NA	P01747	13	7	3	6	0	4	3	4	3	-0.899	-2.4045	0.012034	0.662632	0.001479	0.001479	4	3	7	0.406976	-1.29698
Complement C4-B	C4b	P01029	193	0	2	7	7	9	10	8	14	0.034	0.1341	1	0.571091	0.682135	0.571091	3	4	7	1.03458	0.0490516
Hydroxysteroid dehydrogenase-like protein 2	Hsdl2	Q2TPA8	54	0	12	8	7	12	11	6	9	0.139	0.6178	0.951083	0.377072	0.75723	0.377072	3	4	7	1.14912	0.200535
Heterogeneous nuclear ribonucleoprotein U	Hnrnpu	Q8VEK3	88	4	6	9	5	11	7	7	11	-0.29	-1.1494	0.493137	0.7118	0.148839	0.148839	4	4	8	0.748264	-0.418382
ATP synthase subunit f, mitochondrial	Atp5mf	P56135	10	4	4	6	8	7	5	4	3	-0.27	-0.9336	0.675576	0.71736	0.232098	0.232098	4	4	8	0.763379	-0.389528
60S ribosomal protein L35a	Rpl35a	O55142	13	5	7	9	7	6	9	6	10	-0.001	-0.0054	0.998918	0.610721	0.645349	0.645349	4	4	8	0.999	-0.0014427
Laminin subunit alpha-2	Lama2	Q60675	344	3	24	17	0	0	0	4	5	-0.073	-0.2783	1	0.667678	0.548327	0.548327	3	2	5	0.929601	-0.105317
Myosin regulatory light chain 12B	Myl12b	Q3THE2	20	8	8	8	8	5	6	10	9	-0.238	-0.9885	0.627097	0.716574	0.208984	0.208984	4	4	8	0.788203	-0.343361
Caveolae-associated protein 2	Cavin2	Q63918	47	0	5	7	8	8	10	4	9	0.21	0.7761	0.882368	0.30349	0.766904	0.30349	3	4	7	1.23368	0.302966
S-phase kinase-associated protein 1	Skp1	Q9WTX5	19	6	6	9	8	13	8	4	7	-0.288	-1.1633	0.482237	0.711258	0.144197	0.144197	4	4	8	0.749762	-0.415496
Histone H2B type 3-B	H2bu1	Q8CGP0	14	0	0	0	0	0	0	0	10	0.754	1.5271	0.237253	0.060229	0.734574	0.060229	0	1	1	2.12548	1.08779
ATP synthase-coupling factor 6, mitochondrial	Atp5pf	P97450	12	10	7	6	8	5	10	5	9	0.037	0.142	1	0.568612	0.683982	0.568612	4	4	8	1.03769	0.0533797
60S ribosomal protein L31	Rpl31	P62900	14	7	7	11	11	7	7	6	7	-0.186	-0.7204	0.862699	0.714253	0.332207	0.332207	4	4	8	0.830274	-0.268341
Nexilin	Nexn	Q7TPW1	72	3	9	12	0	4	0	5	21	0.025	0.0947	1	0.583072	0.672548	0.583072	4	2	6	1.02532	0.0360674
Asporin	Aspn	Q99MQ4	43	6	12	12	4	6	3	9	11	-0.332	-1.3303	0.361442	0.703858	0.095552	0.095552	4	4	8	0.717487	-0.478975
60S ribosomal protein L23a	Rpl23a	P62751	18	7	7	8	10	7	10	5	15	0.184	0.7647	0.888954	0.308743	0.76643	0.308743	4	4	8	1.20202	0.265456
Atypical kinase COQ8A, mitochondrial	Coq8a	Q60936	72	3	8	3	6	4	10	2	6	0.62	1.9367	0.081636	0.016375	0.701093	0.016375	4	4	8	1.85893	0.894471
Thioredoxin-dependent peroxide reductase, mitochondrial	Prdx3	P20108	28	6	10	7	7	7	12	4	12	0.302	1.2359	0.460335	0.125679	0.758665	0.125679	4	4	8	1.35256	0.435694
Mitochondrial pyruvate carrier 1	Mpc1	P63030	12	6	7	7	9	8	7	3	7	-0.004	-0.0169	0.9989	0.613644	0.64196	0.64196	4	4	8	0.996008	-0.00577078
Laminin subunit gamma-1	Lamc1	P02468	177	9	22	13	0	3	0	7	8	-0.264	-1.0793	0.549765	0.714257	0.173602	0.173602	4	2	6	0.767974	-0.380871
Ig kappa chain V-VI region NQ6-8.3.1	NA	P04943	12	5	5	8	6	10	8	8	8	-0.34	-1.4044	0.31412	0.700292	0.078088	0.078088	4	4	8	0.71177	-0.490516
Destrin	Dstn	Q9R0P5	19	5	6	5	5	8	9	4	10	0.104	0.3876	0.996501	0.478912	0.730652	0.478912	4	4	8	1.1096	0.15004
GMP reductase 1	Gmpr	Q9DCZ1	37	7	9	6	8	5	10	7	8	0.099	0.3948	0.995605	0.475934	0.731726	0.475934	4	4	8	1.10407	0.142827
Heat shock protein beta-1	Hspb1	P14602	23	13	6	7	4	4	7	7	5	-0.555	-2.0283	0.059775	0.674087	0.008537	0.008537	4	4	8	0.574072	-0.800696
60S ribosomal protein L5	Rpl5	P47962	34	4	5	11	4	9	6	6	13	-0.304	-1.1901	0.461615	0.710173	0.13551	0.13551	4	4	8	0.737861	-0.438579
60S ribosomal protein L28	Rpl28	P41105	16	2	4	7	7	10	13	0	11	0.334	1.2592	0.438262	0.11909	0.757041	0.11909	3	4	7	1.39654	0.48186
Cytochrome c oxidase subunit 6B1	Cox6b1	P56391	10	5	7	8	13	9	10	4	5	0.097	0.3891	0.996322	0.478293	0.730877	0.478293	4	4	8	1.10186	0.139941
Nidogen-1	Nid1	P10493	137	3	17	13	7	5	4	3	8	0.168	0.6291	0.947493	0.37183	0.758144	0.37183	4	4	8	1.18294	0.242373
Transcriptional activator protein Pur-alpha	Pura	P42669	35	3	4	4	6	4	5	5	6	0.025	0.0828	1	0.586568	0.669532	0.586568	4	4	8	1.02532	0.0360674
Phosphoglycerate mutase 2	Pgam2	O70250	29	7	11	5	7	7	7	8	10	0.012	0.0493	1	0.596104	0.66073	0.596104	4	4	8	1.01207	0.0173123
Isovaleryl-CoA dehydrogenase, mitochondrial	Ivd	Q9JHI5	46	3	8	5	10	5	13	7	10	0.482	1.7546	0.1345	0.03051	0.714826	0.03051	4	4	8	1.61931	0.695379
Laminin subunit beta-2	Lamb2	Q61292	197	8	17	14	0	2	0	5	6	-0.397	-1.5548	0.23048	0.693078	0.049871	0.049871	4	2	6	0.672334	-0.57275
2,4-dienoyl-CoA reductase, mitochondrial	Decr1	Q9CQ62	36	3	4	4	11	8	9	5	5	0.151	0.5541	0.968362	0.406352	0.75142	0.406352	4	4	8	1.163	0.217847
Endoplasmin	Hsp90b1	P08113	92	5	6	3	6	6	9	3	20	0.573	1.9165	0.086524	0.017609	0.702502	0.017609	4	4	8	1.77358	0.826664
Aspartate aminotransferase, cytoplasmic	Got1	P05201	46	3	9	6	8	9	11	7	10	0.177	0.6952	0.922923	0.341031	0.762796	0.341031	4	4	8	1.19363	0.255357
Glutathione S-transferase P 1	Gstp1	P19157	24	7	9	5	6	6	11	4	7	0.177	0.6761	0.930662	0.349941	0.761572	0.349941	4	4	8	1.19363	0.255357
Ig kappa chain V-III region PC 3741/TEPC 111	NA	P01660	12	3	0	6	0	8	5	10	4	-1.055	-3.0439	0.000487	0.650229	3.6e-05	3.6e-05	4	2	6	0.348192	-1.52204
D-beta-hydroxybutyrate dehydrogenase, mitochondrial	Bdh1	Q80XN0	38	9	10	4	5	3	9	5	7	0.143	0.5265	0.97458	0.41884	0.748548	0.41884	4	4	8	1.15373	0.206305
Cytochrome b-c1 complex subunit 7	Uqcrb	Q9D855	14	4	5	5	9	8	12	4	10	0.326	1.2165	0.479196	0.131357	0.759954	0.131357	4	4	8	1.38542	0.470319
Protein SET	Set	Q9EQU5	33	5	5	5	5	4	4	5	8	-0.107	-0.3394	1	0.67725	0.521799	0.521799	4	4	8	0.898526	-0.154368
Heterogeneous nuclear ribonucleoprotein K	Hnrnpk	P61979	51	2	6	7	5	5	6	5	19	0.355	1.2909	0.409298	0.110529	0.754707	0.110529	4	4	8	1.42618	0.512157
ATP-dependent 6-phosphofructokinase, platelet type	Pfkp	Q9WUA3	85	0	4	0	0	0	5	0	4	0.811	1.8171	0.113975	0.024844	0.709857	0.024844	0	3	3	2.25016	1.17003
Thioredoxin	Txn	P10639	12	3	7	4	5	5	4	2	3	0.078	0.2337	1	0.537972	0.70377	0.537972	4	4	8	1.08112	0.11253
Nucleolin	Ncl	P09405	77	2	8	3	0	9	8	4	8	0.084	0.2934	1	0.516167	0.715085	0.516167	4	3	7	1.08763	0.121186
NADH dehydrogenase [ubiquinone] 1 subunit C2	Ndufc2	Q9CQ54	14	5	7	6	8	5	11	4	9	0.311	1.1659	0.530063	0.146997	0.763008	0.146997	4	4	8	1.36479	0.448678
Pyruvate carboxylase, mitochondrial	Pc	Q05920	130	0	2	4	6	5	7	0	8	0.494	1.4317	0.297435	0.077835	0.743073	0.077835	2	4	6	1.63886	0.712691
Succinate--CoA ligase [GDP-forming] subunit beta, mitochondrial	Suclg2	Q9Z2I8	47	3	9	4	11	4	11	7	10	0.546	1.9552	0.077351	0.015308	0.699827	0.015308	4	4	8	1.72633	0.787711
26S proteasome non-ATPase regulatory subunit 2	Psmd2	Q8VDM4	100	2	6	4	7	10	14	4	12	0.453	1.7361	0.141115	0.03237	0.716345	0.03237	4	4	8	1.57302	0.653541
Myosin regulatory light polypeptide 9	Myl9	Q9CQ19	20	0	0	9	8	0	0	0	0	-0.261	-0.6779	0.895731	0.712207	0.353636	0.353636	1	1	2	0.770281	-0.376543
ATP-binding cassette sub-family E member 1	Abce1	P61222	67	0	2	3	0	0	2	0	0	-0.232	-0.4283	1	0.689415	0.480303	0.480303	1	2	3	0.792946	-0.334705
Prohibitin-2	Phb2	O35129	33	6	10	10	6	5	9	7	7	-0.108	-0.4288	1	0.689478	0.48006	0.48006	4	4	8	0.897628	-0.155811
Heat shock protein 75 kDa, mitochondrial	Trap1	Q9CQN1	80	0	7	5	8	7	8	6	10	0.282	1.0497	0.651173	0.187434	0.768065	0.187434	3	4	7	1.32578	0.40684
Cofilin-1	Cfl1	P18760	19	5	7	5	5	7	11	2	14	0.425	1.5459	0.226722	0.057153	0.732887	0.057153	4	4	8	1.52959	0.613145
40S ribosomal protein S23	Rps23	P62267	16	3	6	10	8	5	8	6	11	0.096	0.3624	0.998893	0.489197	0.726758	0.489197	4	4	8	1.10076	0.138499
Kinectin	Ktn1	Q61595	153	3	7	9	4	6	8	6	6	-0.185	-0.6209	0.934757	0.708626	0.382772	0.382772	4	4	8	0.831104	-0.266899
Estradiol 17-beta-dehydrogenase 8	Hsd17b8	P50171	27	7	9	6	7	7	6	7	7	-0.144	-0.5458	0.974636	0.702416	0.421361	0.421361	4	4	8	0.865888	-0.207748
5-oxoprolinase	Oplah	Q8K010	138	0	4	4	8	6	8	6	8	0.279	0.9438	0.755737	0.229423	0.769912	0.229423	3	4	7	1.32181	0.402512
E3 ubiquitin-protein ligase TRIM21	Trim21	Q62191	54	2	3	8	7	6	5	3	4	-0.201	-0.6346	0.926169	0.709576	0.375741	0.375741	4	4	8	0.817912	-0.289982
Aflatoxin B1 aldehyde reductase member 2	Akr7a2	Q8CG76	41	7	9	7	9	6	10	5	6	0.073	0.2754	1	0.522894	0.711797	0.522894	4	4	8	1.07573	0.105317
Methylmalonate-semialdehyde dehydrogenase [acylating], mitochondrial	Aldh6a1	Q9EQ20	58	8	7	5	5	8	4	6	4	-0.556	-1.9201	0.087377	0.677881	0.013382	0.013382	4	4	8	0.573498	-0.802138
Ig kappa chain V-III region PC 2880/PC 1229	NA	P01654	12	3	0	4	0	8	9	3	3	-0.454	-1.3619	0.340753	0.702345	0.087801	0.087801	4	2	6	0.635083	-0.654984
Microtubule-associated protein 4	Map4	P27546	117	0	8	0	7	6	13	2	11	1.039	3.2227	0.000231	2.7e-05	0.649415	2.7e-05	2	4	6	2.82639	1.49896
Delta(3,5)-Delta(2,4)-dienoyl-CoA isomerase, mitochondrial	Ech1	O35459	36	0	7	7	7	7	9	6	8	0.149	0.5189	0.976136	0.422252	0.747718	0.422252	3	4	7	1.16067	0.214962
Glutathione peroxidase 3	Gpx3	P46412	25	8	6	7	6	6	6	4	5	-0.307	-1.1023	0.530863	0.713505	0.165225	0.165225	4	4	8	0.735651	-0.442907
ADP-ribose glycohydrolase MACROD1	Macrod1	Q922B1	35	4	7	5	5	6	5	5	7	-0.047	-0.1594	1	0.645884	0.594946	0.594946	4	4	8	0.954087	-0.0678067
60S ribosomal protein L3	Rpl3	P27659	46	0	4	2	4	7	8	6	14	0.374	1.2739	0.424666	0.115064	0.755975	0.115064	3	4	7	1.45354	0.539568
Puromycin-sensitive aminopeptidase	Npepps	Q11011	103	6	7	6	5	8	9	7	7	-0.214	-0.8012	0.794061	0.716746	0.292585	0.292585	4	4	8	0.807348	-0.308737
Filamin-B	Flnb	Q80X90	278	2	0	0	0	0	0	0	0	-0.425	-0.6955	0.882362	0.713118	0.344723	0.344723	1	0	1	0.65377	-0.613145
Dynactin subunit 1	Dctn1	O08788	142	3	5	6	6	6	5	7	9	-0.119	-0.4215	1	0.688553	0.48359	0.48359	4	4	8	0.887808	-0.171681
60S ribosomal protein L18a	Rpl18a	P62717	21	3	6	7	7	4	8	5	6	0.113	0.3745	0.99789	0.484286	0.728654	0.484286	4	4	8	1.11963	0.163025
60S acidic ribosomal protein P0	Rplp0	P14869	34	3	3	5	5	3	8	0	9	0.466	1.4259	0.301505	0.079018	0.743581	0.079018	3	4	7	1.59361	0.672296
Talin-1	Tln1	P26039	270	0	0	0	0	0	2	5	0	-0.702	-1.3999	0.316864	0.70051	0.079077	0.079077	1	1	2	0.495593	-1.01277
Succinyl-CoA:3-ketoacid coenzyme A transferase 1, mitochondrial	Oxct1	Q9D0K2	56	2	4	9	7	4	9	4	7	0.142	0.4734	0.984518	0.442409	0.742397	0.442409	4	4	8	1.15258	0.204863
NADH dehydrogenase [ubiquinone] 1 beta subcomplex subunit 10	Ndufb10	Q9DCS9	21	0	6	3	6	0	11	0	15	1.453	3.709	9e-06	1e-06	0.641716	1e-06	1	4	5	4.27592	2.09624
Decorin	Dcn	P28654	40	2	8	7	6	5	7	3	6	0.216	0.7488	0.897406	0.316096	0.765712	0.316096	4	4	8	1.2411	0.311622
[Protein ADP-ribosylarginine] hydrolase-like protein 1	Adprhl1	Q8BGK2	40	4	6	5	7	7	8	6	8	0.057	0.2085	1	0.546736	0.698632	0.546736	4	4	8	1.05866	0.0822336
40S ribosomal protein S14	Rps14	P62264	16	4	5	7	8	7	7	6	11	0.029	0.1094	1	0.578676	0.676194	0.578676	4	4	8	1.02942	0.0418382
Murinoglobulin-1	Mug1	P28665	165	0	3	0	7	4	9	5	12	0.73	2.2855	0.025576	0.004032	0.681006	0.004032	2	4	6	2.07508	1.05317
60S ribosomal protein L23	Rpl23	P62830	15	4	4	8	10	7	6	5	7	-0.106	-0.3856	1	0.683821	0.500644	0.500644	4	4	8	0.899425	-0.152926
Ig heavy chain V region 3	Ighv1-61	P01749	13	0	0	3	0	0	0	0	0	-0.562	-1.0109	0.607646	0.716111	0.199918	0.199918	1	0	1	0.570068	-0.810795
Elongin-C	Eloc	P83940	12	4	5	6	9	7	8	5	4	-0.071	-0.2465	1	0.662274	0.561451	0.561451	4	4	8	0.931462	-0.102431
Phosphoglycerate kinase 1	Pgk1	P09411	45	12	0	0	5	0	3	0	24	0.473	1.571	0.213335	0.053236	0.730639	0.053236	1	3	4	1.6048	0.682395
Barrier-to-autointegration factor	Banf1	O54962	10	5	9	8	6	4	3	5	5	-0.191	-0.6391	0.923111	0.709875	0.373434	0.373434	4	4	8	0.826133	-0.275555
ATP synthase protein 8	Mtatp8	P03930	8	5	4	5	4	4	8	4	4	-0.123	-0.3767	1	0.682598	0.504789	0.504789	4	4	8	0.884264	-0.177451
Heterogeneous nuclear ribonucleoprotein M	Hnrnpm	Q9D0E1	78	0	11	6	4	6	6	5	9	0.259	0.8647	0.822599	0.263449	0.769416	0.263449	3	4	7	1.29563	0.373658
Gelsolin	Gsn	P13020	86	5	8	10	0	2	0	6	8	-0.497	-1.516	0.250489	0.69491	0.056273	0.056273	4	2	6	0.608353	-0.717019
Electron transfer flavoprotein-ubiquinone oxidoreductase, mitochondrial	Etfdh	Q921G7	68	0	5	7	7	7	11	0	9	0.447	1.5821	0.207631	0.051571	0.729648	0.051571	2	4	6	1.56361	0.644885
40S ribosomal protein S9	Rps9	Q6ZWN5	23	0	5	4	5	9	13	3	9	0.366	1.2585	0.438915	0.119285	0.757091	0.119285	3	4	7	1.44196	0.528026
Insulin-degrading enzyme	Ide	Q9JHR7	118	12	0	10	4	9	4	3	0	-1.368	-3.9105	1e-06	0.642853	0	0	4	2	6	0.254616	-1.97361
Peroxiredoxin-4	Prdx4	O08807	31	0	3	0	0	3	3	3	0	-0.25	-0.571	0.962906	0.704689	0.408428	0.408428	2	2	4	0.778801	-0.360674
DnaJ homolog subfamily A member 2	Dnaja2	Q9QYJ0	46	6	6	6	3	5	3	6	8	-0.389	-1.3108	0.374536	0.704781	0.100559	0.100559	4	4	8	0.677734	-0.561208
Isocitrate dehydrogenase [NADP] cytoplasmic	Idh1	O88844	47	4	7	0	4	0	4	4	3	0.302	0.8061	0.86414	0.289759	0.767987	0.289759	2	4	6	1.35256	0.435694
Cytochrome b-c1 complex subunit 6, mitochondrial	Uqcrh	P99028	10	3	5	4	9	5	9	5	5	0.259	0.8523	0.831976	0.268949	0.769189	0.268949	4	4	8	1.29563	0.373658
EH domain-containing protein 2	Ehd2	Q8BH64	61	4	6	9	5	6	12	0	8	0.224	0.8002	0.867867	0.292448	0.767793	0.292448	3	4	7	1.25107	0.323164
HIV Tat-specific factor 1 homolog	Htatsf1	Q8BGC0	86	0	0	0	0	0	0	2	0	-0.42	-0.7243	0.859529	0.714414	0.330258	0.330258	1	0	1	0.657047	-0.605932
Ig heavy chain V region 345	NA	P18526	13	0	4	4	3	5	5	4	0	-0.292	-0.7715	0.819959	0.716034	0.30695	0.30695	3	3	6	0.746769	-0.421267
Histone-lysine N-methyltransferase Smyd1	Smyd1	P97443	56	0	6	0	9	0	16	0	8	1.715	3.9747	1e-06	0	0.638701	0	0	4	4	5.55668	2.47422
Protein-L-isoaspartate O-methyltransferase domain-containing protein 1	Pcmtd1	P59913	41	6	6	5	6	6	6	7	7	-0.206	-0.756	0.833207	0.71557	0.314543	0.314543	4	4	8	0.813833	-0.297195
Transcriptional activator protein Pur-beta	Purb	O35295	34	4	5	4	6	3	5	4	6	0.109	0.3315	0.999996	0.501502	0.721713	0.501502	4	4	8	1.11516	0.157254
2-oxoisovalerate dehydrogenase subunit alpha, mitochondrial	Bckdha	P50136	50	3	4	4	6	4	7	5	7	0.13	0.415	0.993282	0.467494	0.734653	0.467494	4	4	8	1.13883	0.18755
Cytochrome b-c1 complex subunit 9	Uqcr10	Q8R1I1	7	5	5	6	5	4	6	4	9	0.023	0.0767	1	0.588338	0.667962	0.588338	4	4	8	1.02327	0.033182
Sorting and assembly machinery component 50 homolog	Samm50	Q8BGH2	52	5	7	4	7	4	7	3	8	0.344	1.1063	0.592046	0.16696	0.765969	0.16696	4	4	8	1.41058	0.496287
UTP--glucose-1-phosphate uridylyltransferase	Ugp2	Q91ZJ5	57	6	10	0	4	6	5	4	6	0.115	0.3779	0.99756	0.482897	0.729178	0.482897	3	4	7	1.12187	0.16591
Microsomal glutathione S-transferase 3	Mgst3	Q9CPU4	17	2	4	3	5	5	6	2	7	0.344	1.0223	0.679437	0.197857	0.76881	0.197857	4	4	8	1.41058	0.496287
Sorbin and SH3 domain-containing protein 2	Sorbs2	Q3UTJ2	132	0	8	7	5	4	3	4	3	-0.053	-0.161	1	0.646208	0.594363	0.594363	3	4	7	0.94838	-0.0764628
Aldehyde dehydrogenase, mitochondrial	Aldh2	P47738	57	5	6	4	6	6	11	4	6	0.217	0.6826	0.928087	0.346909	0.762	0.346909	4	4	8	1.24234	0.313065
Unconventional myosin-Ic	Myo1c	Q9WTI7	122	4	15	12	0	3	0	2	9	-0.055	-0.2005	1	0.653916	0.57959	0.57959	4	2	6	0.946485	-0.0793482
Nesprin-1	Syne1	Q6ZWR6	1010	0	0	2	0	3	0	0	0	-0.705	-1.2547	0.413786	0.70737	0.115956	0.115956	2	0	2	0.494109	-1.0171
Vigilin	Hdlbp	Q8VDJ3	142	0	0	0	3	2	4	0	4	0.5	1.0205	0.681236	0.198553	0.768853	0.198553	1	3	4	1.64872	0.721348
Short/branched chain specific acyl-CoA dehydrogenase, mitochondrial	Acadsb	Q9DBL1	48	5	5	5	7	3	7	4	9	0.246	0.8151	0.858113	0.285669	0.768265	0.285669	4	4	8	1.2789	0.354903
Heat shock protein beta-6	Hspb6	Q5EBG6	18	5	8	5	7	6	5	5	8	0.067	0.2409	1	0.535418	0.705197	0.535418	4	4	8	1.0693	0.0966606
Palladin	Palld	Q9ET54	152	0	5	0	3	7	6	4	6	0.179	0.5223	0.97545	0.420727	0.748091	0.420727	2	4	6	1.19602	0.258242
ATP synthase membrane subunit DAPIT, mitochondrial	Atp5md	Q78IK2	6	6	6	5	9	4	7	6	4	-0.001	-0.0027	0.999096	0.610028	0.646138	0.646138	4	4	8	0.999	-0.0014427
ATP-binding cassette sub-family F member 1	Abcf1	Q6P542	95	0	0	0	2	3	2	3	2	-0.35	-0.7169	0.865537	0.714104	0.333959	0.333959	2	3	5	0.704688	-0.504943
Talin-2	Tln2	Q71LX4	254	0	0	2	0	0	0	0	3	-0.12	-0.2259	1	0.658611	0.569696	0.569696	1	1	2	0.88692	-0.173123
Bifunctional epoxide hydrolase 2	Ephx2	P34914	63	4	6	6	5	7	6	4	3	-0.267	-0.8571	0.744239	0.717486	0.266291	0.266291	4	4	8	0.765673	-0.3852
Delta-1-pyrroline-5-carboxylate dehydrogenase, mitochondrial	Aldh4a1	Q8CHT0	62	0	9	8	4	7	3	3	3	-0.191	-0.5975	0.94893	0.706873	0.3948	0.3948	3	4	7	0.826133	-0.275555
LIM and calponin homology domains-containing protein 1	Limch1	Q3UH68	118	3	7	8	5	0	3	3	8	0.145	0.4696	0.985175	0.44407	0.741925	0.44407	3	4	7	1.15604	0.209191
Acyl-CoA dehydrogenase family member 10	Acad10	Q8K370	119	4	9	5	6	0	7	3	7	0.499	1.5276	0.236967	0.060146	0.734529	0.060146	3	4	7	1.64707	0.719905
Enoyl-CoA delta isomerase 2	Eci2	Q9WUR2	43	3	5	2	6	0	8	4	7	0.661	1.9249	0.08446	0.017086	0.701913	0.017086	3	4	7	1.93673	0.953621
Cysteine desulfurase, mitochondrial	Nfs1	Q9Z1J3	51	0	7	0	7	6	5	8	10	0.309	1.0358	0.665536	0.19268	0.768466	0.19268	2	4	6	1.36206	0.445793
40S ribosomal protein S25	Rps25	P62852	14	5	6	4	5	6	5	5	8	-0.027	-0.0909	0.998554	0.63127	0.618734	0.618734	4	4	8	0.973361	-0.0389528
60S ribosomal protein L13	Rpl13	P47963	24	2	4	2	3	5	5	4	5	0.003	0.009	0.999686	0.606989	0.64952	0.606989	4	4	8	1.003	0.00432809
40S ribosomal protein S17	Rps17	P63276	16	0	0	4	6	5	7	5	7	0.053	0.1644	1	0.561448	0.689101	0.561448	3	3	6	1.05443	0.0764628
Succinate dehydrogenase cytochrome b560 subunit, mitochondrial	Sdhc	Q9CZB0	18	2	4	3	6	6	10	3	6	0.362	1.1233	0.574211	0.161097	0.7652	0.161097	4	4	8	1.4362	0.522256
Protein FAM136A	Fam136a	Q9CR98	16	2	3	6	7	5	8	5	4	-0.001	-0.0016	0.999164	0.609745	0.646458	0.646458	4	4	8	0.999	-0.0014427
GTP-binding nuclear protein Ran	Ran	P62827	24	4	5	5	3	4	5	3	13	0.226	0.7199	0.911811	0.32952	0.764234	0.32952	4	4	8	1.25358	0.326049
Citramalyl-CoA lyase, mitochondrial	Clybl	Q8R4N0	38	5	4	4	5	4	7	4	5	-0.048	-0.1553	1	0.645053	0.596432	0.596432	4	4	8	0.953134	-0.0692494
Acyl carrier protein, mitochondrial	Ndufab1	Q9CR21	17	4	5	4	6	5	4	3	4	-0.051	-0.1527	1	0.644523	0.597371	0.597371	4	4	8	0.950279	-0.0735774
Isobutyryl-CoA dehydrogenase, mitochondrial	Acad8	Q9D7B6	45	3	5	4	7	3	8	4	9	0.444	1.3981	0.321585	0.084876	0.745989	0.084876	4	4	8	1.55893	0.640557
Ig kappa chain V-V region MOPC 41	Gm5571	P01639	14	2	0	4	4	3	3	6	5	-0.365	-0.9374	0.672191	0.717322	0.230458	0.230458	4	3	7	0.694197	-0.526584
Ig kappa chain V-V region L7 (Fragment)	Gm10881	P01642	13	3	3	2	2	4	4	6	0	-0.573	-1.4851	0.267191	0.696389	0.061795	0.061795	4	3	7	0.563831	-0.826664
Mitochondrial import inner membrane translocase subunit TIM50	Timm50	Q9D880	40	3	3	0	3	0	4	2	4	0.397	0.944	0.755557	0.22934	0.769911	0.22934	2	4	6	1.48736	0.57275
Laminin subunit beta-1	Lamb1	P02469	197	0	4	0	0	0	0	0	0	0.137	0.2636	1	0.527233	0.709583	0.527233	0	1	1	1.14683	0.197649
Serpin B6	Serpinb6	Q60854	43	3	5	3	4	5	6	4	6	0.063	0.1999	1	0.549669	0.696829	0.549669	4	4	8	1.06503	0.0908898
Glutaryl-CoA dehydrogenase, mitochondrial	Gcdh	Q60759	49	2	3	0	3	3	4	2	3	0.196	0.4541	0.987769	0.450806	0.739954	0.450806	3	4	7	1.21653	0.282768
39S ribosomal protein L12, mitochondrial	Mrpl12	Q9DB15	22	4	6	3	6	4	7	2	4	0.294	0.8537	0.830921	0.268326	0.769217	0.268326	4	4	8	1.34178	0.424152
Aldo-keto reductase family 1 member B1	Akr1b1	P45376	36	3	6	5	5	4	9	0	7	0.469	1.4577	0.279866	0.072694	0.740779	0.072694	3	4	7	1.59839	0.676624
Ras-related protein Rab-1B	Rab1b	Q9D1G1	22	0	4	0	6	0	7	0	6	1.288	2.6784	0.004226	0.00061	0.664951	0.00061	0	4	4	3.62553	1.85819
ADP-ribosylation factor 5	Arf5	P84084	21	0	0	0	4	0	4	0	0	0.54	0.9683	0.732696	0.219313	0.769736	0.219313	0	2	2	1.71601	0.779055
Monocarboxylate transporter 1	Slc16a1	P53986	53	0	4	2	6	2	9	2	7	0.952	2.415	0.014994	0.002237	0.675187	0.002237	3	4	7	2.59089	1.37345
Glutathione S-transferase Mu 1	Gstm1	P10649	26	2	2	4	4	5	8	4	5	0.029	0.091	1	0.584165	0.671617	0.584165	4	4	8	1.02942	0.0418382
High mobility group protein HMG-I/HMG-Y	Hmga1	P17095	12	5	5	3	4	5	3	3	4	-0.23	-0.6766	0.896709	0.712136	0.354296	0.354296	4	4	8	0.794534	-0.33182
60S ribosomal protein L13a	Rpl13a	P19253	23	0	2	0	0	2	6	0	6	0.705	1.5071	0.24888	0.063641	0.736369	0.063641	1	3	4	2.02385	1.0171
Coatomer subunit alpha	Copa	Q8CIE6	138	0	3	2	6	4	5	4	7	0.36	1.0555	0.645203	0.185271	0.767885	0.185271	3	4	7	1.43333	0.51937
Guanine nucleotide-binding protein G(I)/G(S)/G(T) subunit beta-2	Gnb2	P62880	37	3	4	3	6	4	7	4	10	0.375	1.2642	0.433609	0.117709	0.756681	0.117709	4	4	8	1.45499	0.541011
Prostamide/prostaglandin F synthase	Prxl2b	Q9DB60	22	3	6	4	6	3	7	0	4	0.449	1.307	0.395105	0.106354	0.753472	0.106354	3	4	7	1.56674	0.64777
NADH dehydrogenase [ubiquinone] 1 beta subcomplex subunit 6	Ndufb6	Q3UIU2	16	0	5	2	6	4	11	0	9	1.036	2.7922	0.002327	0.000335	0.661035	0.000335	2	4	6	2.81792	1.49463
Glutaredoxin-3	Glrx3	Q9CQM9	38	3	5	5	5	5	6	6	4	-0.187	-0.6214	0.934448	0.708661	0.382515	0.382515	4	4	8	0.829444	-0.269784
Platelet glycoprotein 4	Cd36	Q08857	53	0	0	3	0	2	0	2	5	-0.235	-0.4919	0.994134	0.696922	0.448788	0.448788	3	1	4	0.790571	-0.339033
60S ribosomal protein L22	Rpl22	P67984	15	3	3	5	5	3	4	0	5	0.108	0.294	1	0.515941	0.715193	0.515941	3	4	7	1.11405	0.155811
Short-chain specific acyl-CoA dehydrogenase, mitochondrial	Acads	Q07417	45	3	5	4	6	5	8	4	7	0.219	0.7074	0.917513	0.335343	0.763527	0.335343	4	4	8	1.24483	0.31595
Acyl-coenzyme A thioesterase 2, mitochondrial	Acot2	Q9QYR9	50	0	6	0	6	4	9	0	6	1.007	2.5713	0.007249	0.001051	0.668903	0.001051	1	4	5	2.73738	1.45279
Ras-related protein Rab-10	Rab10	P61027	23	0	5	3	4	3	7	2	4	0.488	1.3203	0.38361	0.102996	0.75243	0.102996	3	4	7	1.62905	0.704035
Prohibitin	Phb	P67778	30	4	5	6	3	4	4	5	3	-0.446	-1.4214	0.303807	0.699467	0.074422	0.074422	4	4	8	0.640184	-0.643442
39S ribosomal protein L14, mitochondrial	Mrpl14	Q9D1I6	16	3	5	4	7	5	5	5	5	0.048	0.1468	1	0.567096	0.685095	0.567096	4	4	8	1.04917	0.0692494
Phosphoglycerate mutase 1	Pgam1	Q9DBJ1	29	5	0	0	0	0	0	0	10	0.174	0.3965	0.995379	0.475228	0.731977	0.475228	1	1	2	1.19006	0.251029
Lysozyme C-1	Lyz1	P17897	17	0	2	4	2	5	0	4	2	-0.857	-1.9479	0.0796	0.67688	0.011951	0.011951	3	3	6	0.424433	-1.23639
Collagen alpha-2(I) chain	Col1a2	Q01149	130	0	4	0	0	0	2	0	6	0.704	1.4326	0.296814	0.077653	0.742994	0.077653	0	3	3	2.02182	1.01566
Glutamine amidotransferase-like class 1 domain-containing protein 3A, mitochondrial	Gatd3a	Q9D172	28	4	5	4	6	2	6	0	6	0.478	1.3571	0.353186	0.094103	0.749448	0.094103	3	4	7	1.61285	0.689608
ATPase family AAA domain-containing protein 3	Atad3	Q925I1	67	0	0	4	5	4	8	2	7	0.384	1.1339	0.563204	0.15751	0.764689	0.15751	3	3	6	1.46815	0.553995
60S ribosomal protein L34	Rpl34	Q9D1R9	13	5	3	6	5	5	7	3	3	-0.243	-0.7385	0.847912	0.714967	0.32319	0.32319	4	4	8	0.784272	-0.350575
NADH dehydrogenase [ubiquinone] 1 beta subcomplex subunit 5, mitochondrial	Ndufb5	Q9CQH3	22	4	4	3	6	4	7	0	5	0.361	1.0318	0.669683	0.194206	0.768573	0.194206	3	4	7	1.43476	0.520813
Eukaryotic initiation factor 4A-I	Eif4a1	P60843	46	2	0	0	5	0	5	3	11	0.805	2.023	0.063108	0.01188	0.695396	0.01188	2	3	5	2.2367	1.16137
40S ribosomal protein S26	Rps26	P62855	13	3	4	4	5	4	4	3	5	0.018	0.0545	1	0.594652	0.662127	0.594652	4	4	8	1.01816	0.0259685
Polyadenylate-binding protein 2	Pabpn1	Q8CCS6	32	5	7	4	3	4	6	6	5	-0.145	-0.496	0.992871	0.69737	0.446718	0.446718	4	4	8	0.865022	-0.209191
Lipoprotein lipase	Lpl	P11152	53	3	5	6	6	6	4	2	5	-0.026	-0.0763	0.998231	0.627951	0.623511	0.623511	4	4	8	0.974335	-0.0375101
Selenium-binding protein 2	Selenbp2	Q63836	53	7	5	4	3	3	6	3	7	-0.033	-0.1019	0.998838	0.633724	0.615066	0.615066	4	4	8	0.967539	-0.0476089
E3 ubiquitin-protein ligase RBX1	Rbx1	P62878	12	0	0	5	5	4	5	4	5	-0.091	-0.2607	1	0.664724	0.555647	0.555647	3	3	6	0.913018	-0.131285
60S ribosomal protein L37a	Rpl37a	P61514	10	2	2	3	3	6	2	2	3	-0.46	-1.2329	0.429606	0.708342	0.122334	0.122334	4	4	8	0.631284	-0.66364
60S ribosomal protein L10a	Rpl10a	P53026	25	2	3	3	0	5	3	2	4	-0.302	-0.7484	0.839664	0.715319	0.31829	0.31829	4	3	7	0.739338	-0.435694
Caveolin-1	Cav1	P49817	21	2	3	3	6	3	5	0	4	0.423	1.124	0.573482	0.160858	0.765167	0.160858	3	4	7	1.52653	0.61026
Prostaglandin reductase-3	Zadh2	Q8BGC4	41	3	5	4	7	0	6	0	9	0.801	2.2301	0.031514	0.00513	0.683718	0.00513	2	4	6	2.22777	1.1556
Obscurin	Obscn	A2AAJ9	967	0	5	0	0	0	0	0	3	0.441	0.85	0.833705	0.269973	0.769143	0.269973	0	2	2	1.55426	0.636229
Ig lambda-1 chain V region S178	NA	P01725	12	0	0	2	2	4	3	3	5	-0.125	-0.303	1	0.671672	0.537807	0.537807	3	3	6	0.882497	-0.180337
Cardiac phospholamban	Pln	P61014	6	0	0	0	5	0	4	0	0	0.653	1.2603	0.437236	0.118786	0.756962	0.118786	0	2	2	1.9213	0.94208
Branched-chain-amino-acid aminotransferase, mitochondrial	Bcat2	O35855	44	2	3	4	2	2	7	3	6	0.206	0.5625	0.966358	0.402524	0.752251	0.402524	4	4	8	1.22875	0.297195
39S ribosomal protein L22, mitochondrial	Mrpl22	Q8BU88	24	2	4	4	5	3	6	0	5	0.41	1.1573	0.538887	0.149774	0.76348	0.149774	3	4	7	1.50682	0.591505
Propionyl-CoA carboxylase beta chain, mitochondrial	Pccb	Q99MN9	58	0	5	3	2	3	6	0	5	0.5	1.3335	0.372516	0.099735	0.751375	0.099735	2	4	6	1.64872	0.721348
Methylmalonic aciduria type A homolog, mitochondrial	Mmaa	Q8C7H1	46	3	7	5	5	3	6	2	4	0.271	0.7854	0.876828	0.299218	0.767265	0.299218	4	4	8	1.31128	0.39097
Cytochrome c oxidase subunit 7A1, mitochondrial	Cox7a1	P56392	9	5	6	5	4	5	0	6	4	-0.564	-1.6496	0.18575	0.688752	0.036562	0.036562	4	3	7	0.568929	-0.81368
Protein phosphatase 1 regulatory subunit 12B	Ppp1r12b	Q8BG95	109	0	0	0	0	0	0	0	2	-0.14	-0.2308	1	0.659494	0.567753	0.567753	0	1	1	0.869358	-0.201977
Epiplakin	Eppk1	Q8R0W0	725	7	0	0	0	0	0	0	0	-1.082	-2.0392	0.057386	0.673719	0.008148	0.008148	1	0	1	0.338917	-1.561
Receptor of activated protein C kinase 1	Rack1	P68040	35	3	6	4	5	0	3	2	9	0.553	1.4655	0.274737	0.071204	0.740087	0.071204	3	4	7	1.73846	0.79781
60S ribosomal protein L14	Rpl14	Q9CR57	24	3	5	3	4	5	4	4	5	-0.074	-0.2216	1	0.657831	0.571393	0.571393	4	4	8	0.928672	-0.106759
F-actin-capping protein subunit beta	Capzb	P47757	31	3	8	9	0	0	0	5	3	-0.554	-1.6591	0.181611	0.688333	0.035401	0.035401	3	2	5	0.574647	-0.799253
EH domain-containing protein 1	Ehd1	Q9WVK4	61	0	3	0	3	0	0	3	4	0.243	0.5297	0.973899	0.417399	0.748892	0.417399	1	3	4	1.27507	0.350575
ATP-dependent RNA helicase DDX3Y	Ddx3y	Q62095	73	2	6	3	4	2	6	5	8	0.426	1.1983	0.497226	0.136844	0.761105	0.136844	4	4	8	1.53112	0.614588
Ig lambda-1 chain V region	NA	P01723	12	0	0	0	4	0	0	0	3	0.467	0.8679	0.820165	0.262036	0.769468	0.262036	0	2	2	1.5952	0.673739
Protein FAM210A	Fam210a	Q8BGY7	32	0	2	3	7	0	7	0	4	0.838	2.0653	0.055283	0.010088	0.692791	0.010088	1	4	5	2.31174	1.20898
Histone H1.3	H1-3	P43277	22	0	2	0	4	2	6	2	9	0.91	2.2932	0.024818	0.003896	0.680641	0.003896	2	4	6	2.48432	1.31285
28S ribosomal protein S36, mitochondrial	Mrps36	Q9CQX8	11	0	3	0	5	4	8	2	4	0.627	1.5465	0.226395	0.057057	0.732833	0.057057	2	4	6	1.87199	0.90457
Transforming protein RhoA	Rhoa	Q9QUI0	22	2	3	3	4	0	6	0	6	0.652	1.6758	0.16459	0.039065	0.721428	0.039065	2	4	6	1.91938	0.940637
Actin-binding LIM protein 1	Ablim1	Q8K4G5	97	0	7	3	0	0	0	3	4	0.151	0.3746	0.997881	0.484246	0.728669	0.484246	2	2	4	1.163	0.217847
60S ribosomal protein L21	Rpl21	O09167	19	0	3	3	3	2	3	3	2	-0.057	-0.1318	0.999585	0.640183	0.604805	0.604805	3	4	7	0.944594	-0.0822336
[Pyruvate dehydrogenase (acetyl-transferring)] kinase isozyme 2, mitochondrial	Pdk2	Q9JK42	46	0	4	0	4	0	3	3	5	0.622	1.3544	0.355363	0.094735	0.749671	0.094735	1	4	5	1.86265	0.897356
Transthyretin	Ttr	P07309	16	3	3	4	4	3	5	3	4	-0.031	-0.085	0.998301	0.629937	0.620676	0.620676	4	4	8	0.969476	-0.0447235
Mitochondrial import inner membrane translocase subunit TIM44	Timm44	O35857	51	0	3	0	6	3	6	3	9	0.798	2.0336	0.061064	0.011407	0.694732	0.011407	2	4	6	2.22109	1.15127
NADH dehydrogenase [ubiquinone] flavoprotein 3, mitochondrial	Ndufv3	Q8BK30	12	0	4	0	3	6	7	3	4	0.249	0.6901	0.92506	0.34341	0.762479	0.34341	2	4	6	1.28274	0.359231
Plectin	Plec	Q9QXS1	534	8	0	0	0	0	0	0	0	-1.138	-2.2886	0.02031	0.665884	0.002618	0.002618	1	0	1	0.320459	-1.64179
Poly(rC)-binding protein 1	Pcbp1	P60335	37	2	4	3	4	3	4	3	9	0.378	1.0652	0.635147	0.181684	0.767565	0.181684	4	4	8	1.45936	0.545339
Serotransferrin	Tf	Q921I1	77	0	4	4	4	6	5	2	4	0.004	0.0134	0.999831	0.605832	0.650778	0.605832	3	4	7	1.00401	0.00577078
Ras-related protein Rab-1A	Rab1A	P62821	23	0	4	0	0	0	6	0	0	0.696	1.3752	0.338978	0.08994	0.747937	0.08994	0	2	2	2.00571	1.00412
Heterogeneous nuclear ribonucleoprotein H	Hnrnph1	O35737	49	0	0	0	0	0	2	0	2	0.101	0.1706	1	0.559427	0.690483	0.559427	0	2	2	1.10628	0.145712
Troponin C, slow skeletal and cardiac muscles	Tnnc1	P19123	18	3	0	6	3	0	0	0	3	-0.52	-1.2295	0.432111	0.708491	0.12335	0.12335	2	2	4	0.594521	-0.750201
Dystrophin	Dmd	P11531	426	0	4	4	3	4	0	4	3	-0.442	-1.1167	0.519189	0.713006	0.160106	0.160106	3	3	6	0.64275	-0.637671
40S ribosomal protein S8	Rps8	P62242	24	4	4	6	2	2	2	4	7	-0.338	-0.9321	0.676913	0.717374	0.232747	0.232747	4	4	8	0.713195	-0.487631
Prostaglandin E synthase 2	Ptges2	Q8BWM0	43	2	3	5	4	0	4	4	3	-0.072	-0.1811	1	0.650195	0.586938	0.586938	3	4	7	0.930531	-0.103874
Annexin A1	Anxa1	P10107	39	5	4	13	3	0	0	2	0	-1.016	-2.6174	0.004507	0.657472	0.00048	0.00048	3	2	5	0.36204	-1.46578
Dynein light chain 2, cytoplasmic	Dynll2	Q9D0M5	10	3	4	4	4	4	4	5	3	-0.292	-0.8697	0.732906	0.717551	0.260508	0.260508	4	4	8	0.746769	-0.421267
Heterogeneous nuclear ribonucleoprotein A1	Hnrnpa1	P49312	34	0	0	0	0	0	0	0	16	1.106	2.3213	0.022211	0.003438	0.67933	0.003438	0	1	1	3.02225	1.59562
Protein NDRG2	Ndrg2	Q9QYG0	41	0	2	0	2	0	4	2	0	0.183	0.3796	0.997387	0.482201	0.729438	0.482201	1	3	4	1.20081	0.264013
Carnitine O-palmitoyltransferase 2, mitochondrial	Cpt2	P52825	74	0	4	2	4	3	3	0	3	0.376	0.8761	0.813904	0.258429	0.769589	0.258429	2	4	6	1.45645	0.542453
Calcium/calmodulin-dependent protein kinase type II subunit delta	Camk2d	Q6PHZ2	56	0	5	3	4	3	6	3	7	0.514	1.3632	0.348356	0.092683	0.748942	0.092683	3	4	7	1.67197	0.741545
Hexokinase HKDC1	Hkdc1	Q91W97	102	0	0	0	0	0	4	0	0	0.179	0.3226	1	0.504977	0.720205	0.504977	0	1	1	1.19602	0.258242
Ryanodine receptor 1	Ryr1	E9PZQ0	565	0	0	2	0	0	0	0	0	-0.455	-0.7076	0.87304	0.713692	0.338627	0.338627	1	0	1	0.634448	-0.656426
NADH dehydrogenase [ubiquinone] 1 alpha subcomplex subunit 11	Ndufa11	Q9D8B4	15	2	0	2	3	3	7	2	7	0.45	1.1399	0.556946	0.155502	0.76439	0.155502	4	3	7	1.56831	0.649213
60S ribosomal protein L9	Rpl9	P51410	22	2	2	0	2	2	3	4	5	0.035	0.0872	1	0.585282	0.670654	0.585282	3	4	7	1.03562	0.0504943
Protein S100-A11	S100a11	P50543	11	6	4	3	3	0	3	0	4	-0.031	-0.0844	0.998271	0.629801	0.620872	0.620872	2	4	6	0.969476	-0.0447235
Alpha-mannosidase 2C1	Man2c1	Q91W89	116	0	5	3	3	4	5	6	3	-0.107	-0.3054	1	0.672051	0.536771	0.536771	3	4	7	0.898526	-0.154368
60S ribosomal protein L24	Rpl24	Q8BP67	18	2	2	2	4	4	5	2	0	-0.044	-0.1035	0.998859	0.634078	0.614527	0.614527	4	3	7	0.956954	-0.0634786
ATP synthase subunit delta, mitochondrial	Atp5f1d	Q9D3D9	18	2	2	2	4	2	4	2	2	0.195	0.4345	0.990507	0.459225	0.737355	0.459225	4	4	8	1.21531	0.281326
Cytochrome c oxidase subunit 6A2, mitochondrial	Cox6a2	P43023	11	0	0	0	0	0	0	2	0	-0.414	-0.6754	0.897611	0.71207	0.354906	0.354906	1	0	1	0.661001	-0.597276
Histidine ammonia-lyase	Hal	P35492	72	5	0	0	2	0	0	0	0	-0.664	-1.2827	0.393913	0.706092	0.108088	0.108088	1	1	2	0.514788	-0.95795
Ig kappa chain V-II region 7S34.1	NA	P01630	12	2	2	3	4	2	3	3	3	-0.061	-0.1395	0.999839	0.6418	0.602091	0.602091	4	4	8	0.940823	-0.0880044
S-formylglutathione hydrolase	Esd	Q9R0P3	31	0	5	2	0	4	2	5	5	-0.195	-0.5164	0.986281	0.699525	0.436374	0.436374	3	3	6	0.822835	-0.281326
Fermitin family homolog 2	Fermt2	Q8CIB5	78	0	4	0	4	3	6	2	4	0.625	1.5473	0.225959	0.056929	0.732762	0.056929	2	4	6	1.86825	0.901684
Elongation factor G, mitochondrial	Gfm1	Q8K0D5	84	0	3	0	4	3	10	2	6	0.845	2.1562	0.040957	0.007001	0.687587	0.007001	2	4	6	2.32798	1.21908
Caveolin-3	Cav3	P51637	17	0	0	0	4	3	3	0	4	0.405	0.8503	0.83348	0.26984	0.769149	0.26984	1	3	4	1.4993	0.584291
Ig kappa chain V-V region MOPC 149	NA	P01636	12	0	0	2	3	0	2	0	2	0.169	0.3342	0.999971	0.500442	0.722166	0.500442	1	3	4	1.18412	0.243815
Ras-related protein Rab-21	Rab21	P35282	24	2	0	3	0	2	0	2	2	-0.727	-1.5105	0.253391	0.695172	0.057227	0.057227	4	1	5	0.483357	-1.04884
Nebulin-related-anchoring protein	Nrap	Q80XB4	196	0	0	0	0	0	4	0	5	0.536	1.0817	0.617794	0.17568	0.76697	0.17568	0	2	2	1.70916	0.773285
Coiled-coil-helix-coiled-coil-helix domain-containing protein 1	Chchd1	Q9CQA6	14	5	3	2	3	4	4	4	4	-0.314	-0.8755	0.727688	0.717569	0.257866	0.257866	4	4	8	0.730519	-0.453006
Presequence protease, mitochondrial	Pitrm1	Q8K411	117	3	4	3	4	6	3	0	3	-0.182	-0.4906	0.994531	0.696779	0.449443	0.449443	3	4	7	0.833601	-0.26257
Galectin-1	Lgals1	P16045	15	0	4	0	5	5	5	0	7	0.642	1.7062	0.152378	0.035565	0.71884	0.035565	1	4	5	1.90028	0.92621
High affinity immunoglobulin gamma Fc receptor I	Fcgr1	P26151	45	0	2	6	5	3	6	4	4	-0.031	-0.0902	0.998528	0.631113	0.618965	0.618965	3	4	7	0.969476	-0.0447235
NADH dehydrogenase [ubiquinone] 1 beta subcomplex subunit 1	Ndufb1	P0DN34	7	0	0	0	2	0	4	0	3	0.545	1.0874	0.611836	0.173635	0.76675	0.173635	0	3	3	1.72461	0.786269
HIG1 domain family member 1A, mitochondrial	Higd1a	Q9JLR9	10	0	3	3	4	3	2	2	3	0.068	0.1664	1	0.560798	0.689548	0.560798	3	4	7	1.07037	0.0981033
ATP synthase subunit a	Mtatp6	P00848	25	0	0	0	4	0	0	0	0	0.174	0.3278	1	0.50295	0.721088	0.50295	0	1	1	1.19006	0.251029
Mitochondrial fission process protein 1	Mtfp1	Q9CRB8	18	0	2	3	4	0	7	0	5	0.711	1.6563	0.172845	0.041449	0.723111	0.041449	1	4	5	2.03603	1.02576
Ryanodine receptor 2	Ryr2	E9Q401	565	0	0	0	2	0	6	0	4	0.724	1.4153	0.30906	0.081213	0.744504	0.081213	0	3	3	2.06267	1.04451
Ig heavy chain V region MOPC 47A	NA	P01786	13	0	2	3	2	0	0	2	3	-0.1	-0.2062	1	0.654988	0.577397	0.577397	2	3	5	0.904837	-0.14427
Fibrinogen gamma chain	Fgg	Q8VCM7	49	2	6	4	3	0	3	0	4	0.384	1.0157	0.686038	0.200415	0.768962	0.200415	2	4	6	1.46815	0.553995
Elongation factor 1-gamma	Eef1g	Q9D8N0	50	2	4	0	0	4	3	0	7	0.329	0.813	0.859525	0.286622	0.768202	0.286622	2	3	5	1.38958	0.474647
ATPase family AAA domain-containing protein 1	Atad1	Q9D5T0	41	0	3	3	3	3	5	4	3	0.006	0.0159	0.999895	0.605171	0.651488	0.605171	3	4	7	1.00602	0.00865617
Valine--tRNA ligase	Vars1	Q9Z1Q9	140	0	3	0	3	0	4	0	6	0.948	2.0156	0.064554	0.01222	0.695864	0.01222	0	4	4	2.58054	1.36767
Myosin light chain kinase 3	Mylk3	Q3UIZ8	86	0	0	4	6	5	8	0	5	0.317	0.9104	0.78551	0.243549	0.769902	0.243549	2	3	5	1.373	0.457334
Heterogeneous nuclear ribonucleoprotein Q	Syncrip	Q7TMK9	70	0	0	0	0	3	3	2	5	0.046	0.0998	1	0.581555	0.673823	0.581555	2	2	4	1.04707	0.066364
NADH dehydrogenase [ubiquinone] 1 beta subcomplex subunit 11, mitochondrial	Ndufb11	O09111	17	0	3	0	3	0	2	0	3	0.635	1.2	0.495529	0.136325	0.761	0.136325	0	4	4	1.88702	0.916111
BAG family molecular chaperone regulator 3	Bag3	Q9JLV1	62	0	3	0	2	7	2	4	4	-0.402	-1.0203	0.599554	0.715893	0.196178	0.196178	2	4	6	0.668981	-0.579963
Rho guanine nucleotide exchange factor 5	Arhgef5	E9Q7D5	177	0	0	0	8	0	5	0	7	1.165	2.4664	0.011919	0.001754	0.673044	0.001754	0	3	3	3.20592	1.68074
Cell division control protein 42 homolog	Cdc42	P60766	21	0	2	0	4	0	5	0	10	1.207	2.66	0.004645	0.000671	0.665611	0.000671	0	4	4	3.34344	1.74133
MICOS complex subunit MIC13	Micos13	Q8R404	13	0	3	0	4	3	4	3	3	0.267	0.6515	0.939913	0.36141	0.759852	0.36141	2	4	6	1.30604	0.3852
Nebulette	Nebl	Q0II04	52	0	6	2	0	0	3	3	6	0.494	1.1291	0.568177	0.159128	0.764923	0.159128	2	3	5	1.63886	0.712691
F-actin-capping protein subunit alpha-2	Capza2	P47754	33	2	4	5	2	2	0	0	2	-0.352	-0.8107	0.785682	0.716926	0.288046	0.288046	3	3	6	0.70328	-0.507829
Gap junction alpha-1 protein	Gja1	P23242	43	0	4	2	4	2	6	0	5	0.767	1.7269	0.144505	0.03333	0.717107	0.03333	2	4	6	2.1533	1.10655
Ras-related C3 botulinum toxin substrate 1	Rac1	P63001	21	0	3	2	3	0	4	0	10	0.94	2.0027	0.067132	0.012831	0.696689	0.012831	1	4	5	2.55998	1.35613
Protein-cysteine N-palmitoyltransferase HHAT-like protein	Hhatl	Q9D1G3	56	3	5	2	4	0	4	3	6	0.461	1.1807	0.514967	0.142297	0.762163	0.142297	3	4	7	1.58566	0.665082
Cullin-associated NEDD8-dissociated protein 2	Cand2	Q6ZQ73	136	0	3	3	0	5	6	0	5	0.163	0.4167	0.993066	0.466778	0.734893	0.466778	2	3	5	1.17704	0.235159
Mitochondrial import receptor subunit TOM22 homolog	Tomm22	Q9CPQ3	16	2	2	2	5	0	5	2	4	0.513	1.2036	0.491945	0.135231	0.760776	0.135231	3	4	7	1.67029	0.740103
NADH dehydrogenase [ubiquinone] 1 beta subcomplex subunit 3	Ndufb3	Q9CQZ6	12	0	3	3	5	0	3	2	0	0.228	0.5105	0.977756	0.426008	0.746781	0.426008	2	3	5	1.25609	0.328934
60S ribosomal protein L17	Rpl17	Q9CPR4	21	0	0	4	0	4	0	0	2	-0.846	-1.596	0.210331	0.691169	0.043694	0.043694	2	1	3	0.429128	-1.22052
Ig kappa chain V-IV region S107B	NA	P01680	14	0	0	3	3	0	3	0	0	0.114	0.214	1	0.544844	0.69977	0.544844	1	2	3	1.12075	0.164467
ATP-dependent RNA helicase DDX1	Ddx1	Q91VR5	83	0	2	0	2	0	5	0	5	0.843	1.6983	0.155474	0.03645	0.719508	0.03645	0	4	4	2.32333	1.21619
Metaxin-2	Mtx2	O88441	30	4	3	2	3	3	4	3	3	-0.142	-0.3688	1	0.681496	0.508442	0.508442	4	4	8	0.867621	-0.204863
Protein transport protein Sec31B	Sec31b	Q3TZ89	126	3	0	0	0	0	0	0	0	-0.618	-1.1043	0.529235	0.713437	0.164509	0.164509	1	0	1	0.539021	-0.891586
Alpha-1-antitrypsin 1-5	Serpina1e	Q00898	46	2	4	0	4	3	3	2	4	0.335	0.8393	0.841624	0.274757	0.768908	0.274757	3	4	7	1.39794	0.483303
60S ribosomal protein L7	Rpl7	P14148	31	0	0	0	0	5	10	2	0	0.131	0.3267	1	0.50338	0.720902	0.50338	2	1	3	1.13997	0.188993
Translationally-controlled tumor protein	Tpt1	P63028	19	0	3	4	2	0	6	0	5	0.544	1.3355	0.370853	0.099248	0.751214	0.099248	1	4	5	1.72288	0.784826
39S ribosomal protein L11, mitochondrial	Mrpl11	Q9CQF0	21	2	5	4	5	2	6	2	2	0.31	0.8445	0.837828	0.272429	0.769026	0.272429	4	4	8	1.36343	0.447235
Ferritin light chain 1	Ftl1	P29391	21	0	2	3	6	3	7	0	4	0.578	1.5227	0.239776	0.060967	0.734969	0.060967	2	4	6	1.78247	0.833878
Guanine nucleotide-binding protein G(i) subunit alpha-2	Gnai2	P08752	40	0	2	0	3	0	4	2	5	0.688	1.39	0.327639	0.086644	0.746682	0.086644	1	4	5	1.98973	0.992574
Kinesin-1 heavy chain	Kif5b	Q61768	110	0	4	0	6	0	9	0	5	1.251	2.7447	0.002992	0.000431	0.662634	0.000431	0	4	4	3.49384	1.80481
X-ray repair cross-complementing protein 5	Xrcc5	P27641	83	0	6	0	7	0	0	0	7	1.235	2.5664	0.007424	0.001077	0.66909	0.001077	0	3	3	3.43838	1.78173
[Pyruvate dehydrogenase (acetyl-transferring)] kinase isozyme 1, mitochondrial	Pdk1	Q8BFP9	49	0	0	0	0	0	0	0	3	0.069	0.1274	1	0.573173	0.680548	0.573173	0	1	1	1.07144	0.099546
Fructose-bisphosphate aldolase C	Aldoc	P05063	39	0	0	0	0	0	0	0	4	0.177	0.3104	1	0.509695	0.718099	0.509695	0	1	1	1.19363	0.255357
Sodium/potassium-transporting ATPase subunit beta-1	Atp1b1	P14094	35	2	0	3	2	2	4	2	7	0.151	0.3757	0.997776	0.483797	0.728839	0.483797	4	3	7	1.163	0.217847
Mitochondrial fission 1 protein	Fis1	Q9CQ92	17	0	2	0	6	3	0	2	4	0.344	0.7529	0.895248	0.314198	0.765903	0.314198	2	3	5	1.41058	0.496287
N-acetylneuraminate 9-O-acetyltransferase	Casd1	Q7TN73	92	0	0	3	0	3	3	2	2	-0.44	-0.9397	0.670144	0.717299	0.229468	0.229468	3	2	5	0.644036	-0.634786
Perilipin-4	Plin4	O88492	139	0	0	0	4	3	4	2	4	0.286	0.6558	0.938391	0.359406	0.760164	0.359406	2	3	5	1.33109	0.412611
NADH dehydrogenase [ubiquinone] 1 beta subcomplex subunit 7	Ndufb7	Q9CR61	16	0	3	0	3	2	3	0	5	0.663	1.3311	0.374518	0.100322	0.751568	0.100322	1	4	5	1.94061	0.956507
UPF0598 protein C8orf82 homolog	NA	Q8VE95	24	2	3	0	3	3	4	3	4	0.156	0.4032	0.994637	0.47244	0.732958	0.47244	3	4	7	1.16883	0.22506
Plasminogen	Plg	P20918	91	2	4	9	0	0	0	0	2	-0.661	-1.6195	0.199324	0.690099	0.040445	0.040445	2	2	4	0.516335	-0.953621
Ras-related protein Rab-8A	Rab8a	P55258	24	0	0	0	2	0	3	0	0	0.177	0.3137	1	0.508425	0.718674	0.508425	0	2	2	1.19363	0.255357
2-oxoisovalerate dehydrogenase subunit beta, mitochondrial	Bckdhb	Q6P3A8	43	2	3	3	3	0	3	3	3	-0.024	-0.062	0.998447	0.624626	0.628099	0.628099	3	4	7	0.976286	-0.0346247
28S ribosomal protein S9, mitochondrial	Mrps9	Q9D7N3	45	0	3	4	4	3	4	2	5	0.176	0.4754	0.984207	0.441534	0.742644	0.441534	3	4	7	1.19244	0.253914
Moesin	Msn	P26041	68	0	0	0	0	0	0	0	12	0.763	1.6658	0.168783	0.040273	0.722289	0.040273	0	1	1	2.1447	1.10078
Envoplakin	Evpl	Q9D952	232	3	0	0	0	0	0	0	0	-0.609	-1.0607	0.565262	0.714821	0.180549	0.180549	1	0	1	0.543894	-0.878601
Collagen alpha-1(XV) chain	Col15a1	O35206	140	3	8	6	0	2	0	3	0	-0.451	-1.13	0.508503	0.712527	0.155461	0.155461	4	1	5	0.636991	-0.650655
60S ribosomal protein L35	Rpl35	Q6ZWV7	15	0	2	0	0	2	3	0	7	0.546	1.1185	0.579225	0.162738	0.765423	0.162738	1	3	4	1.72633	0.787711
ATP synthase subunit ATP5MPL, mitochondrial	Atp5mpl	P56379	7	0	0	3	0	0	4	3	0	-0.253	-0.5141	0.987049	0.699288	0.437544	0.437544	2	1	3	0.776468	-0.365002
Glutamine synthetase	Glul	P15105	42	0	2	0	2	0	3	3	3	0.157	0.3344	0.999968	0.500363	0.722199	0.500363	1	4	5	1.17	0.226503
Serine/threonine-protein phosphatase 2A catalytic subunit alpha isoform	Ppp2ca	P63330	36	4	4	3	3	0	3	0	2	0.032	0.0786	1	0.587788	0.668453	0.587788	2	4	6	1.03252	0.0461662
40S ribosomal protein S10	Rps10	P63325	19	2	4	2	3	0	3	0	0	0.288	0.658	0.937584	0.358381	0.760322	0.358381	2	3	5	1.33376	0.415496
NADH dehydrogenase [ubiquinone] 1 alpha subcomplex subunit 3	Ndufa3	Q9CQ91	9	2	0	2	3	2	2	2	2	-0.261	-0.5387	0.977634	0.701741	0.424995	0.424995	4	3	7	0.770281	-0.376543
Translational activator of cytochrome c oxidase 1	Taco1	Q8K0Z7	32	3	3	3	0	0	3	3	3	-0.254	-0.609	0.942034	0.707755	0.388886	0.388886	3	3	6	0.775692	-0.366445
Polyadenylate-binding protein 1	Pabpc1	P29341	71	0	0	0	0	0	0	2	0	-0.433	-0.7257	0.858389	0.714471	0.329559	0.329559	1	0	1	0.64856	-0.624687
Coagulation factor XIII A chain	F13a1	Q8BH61	83	0	4	0	5	0	5	0	6	1.151	2.4999	0.010209	0.001493	0.67169	0.001493	0	4	4	3.16135	1.66054
Profilin-1	Pfn1	P62962	15	0	3	2	3	2	6	0	7	0.758	1.7441	0.138221	0.031554	0.715685	0.031554	2	4	6	2.134	1.09356
NADH dehydrogenase [ubiquinone] 1 beta subcomplex subunit 9	Ndufb9	Q9CQJ8	22	0	3	0	2	0	8	0	0	0.855	1.7557	0.134115	0.030402	0.714737	0.030402	0	3	3	2.35137	1.2335
MAP/microtubule affinity-regulating kinase 3	Mark3	Q03141	84	0	0	5	2	2	2	2	0	-0.691	-1.4549	0.284169	0.697845	0.067568	0.067568	3	2	5	0.501075	-0.996902
Protein S100-A14	S100a14	Q9D2Q8	12	4	2	3	2	2	2	3	0	-0.729	-1.5256	0.245417	0.694454	0.054633	0.054633	4	3	7	0.482391	-1.05172
Macrophage migration inhibitory factor	Mif	P34884	13	0	0	0	0	0	2	2	2	-0.105	-0.191	1	0.652108	0.583208	0.583208	1	2	3	0.900325	-0.151483
Complex I assembly factor ACAD9, mitochondrial	Acad9	Q8JZN5	69	0	2	2	2	3	2	2	3	-0.17	-0.3638	1	0.68079	0.51074	0.51074	3	4	7	0.843665	-0.245258
Obg-like ATPase 1	Ola1	Q9CZ30	45	0	0	0	0	0	2	0	0	-0.161	-0.2805	1	0.668041	0.547402	0.547402	0	1	1	0.851292	-0.232274
Phosphatidylethanolamine-binding protein 1	Pebp1	P70296	21	2	3	2	4	3	5	0	0	0.271	0.6247	0.948911	0.373872	0.757792	0.373872	3	3	6	1.31128	0.39097
Carbonyl reductase [NADPH] 1	Cbr1	P48758	31	2	2	2	0	5	3	2	3	-0.424	-1.017	0.602391	0.715971	0.197486	0.197486	4	3	7	0.654424	-0.611703
Acetyl-CoA carboxylase 2	Acacb	E9Q4Z2	276	0	0	0	0	0	0	0	6	0.365	0.6828	0.928007	0.346816	0.762013	0.346816	0	1	1	1.44051	0.526584
Apolipoprotein A-I	Apoa1	Q00623	31	0	0	2	0	3	0	3	0	-0.953	-1.8434	0.111088	0.680744	0.018111	0.018111	3	0	3	0.385583	-1.37489
Resistin-like gamma	Retnlg	Q8K426	13	3	4	4	4	3	4	2	0	-0.146	-0.3812	1	0.683219	0.502697	0.502697	4	3	7	0.864158	-0.210633
Cytochrome c oxidase subunit 7A2, mitochondrial	Cox7a2	P48771	9	0	5	0	5	3	6	2	2	0.649	1.6692	0.167347	0.039859	0.721995	0.039859	2	4	6	1.91363	0.936309
Endonuclease G, mitochondrial	Endog	O08600	32	0	5	0	3	3	0	0	0	0.149	0.3105	1	0.509657	0.718117	0.509657	1	2	3	1.16067	0.214962
Collagen alpha-1(I) chain	Col1a1	P11087	138	0	4	0	0	0	0	0	0	0.149	0.2666	1	0.526136	0.710151	0.526136	0	1	1	1.16067	0.214962
Basigin	Bsg	P18572	42	2	2	2	2	2	5	0	6	0.449	1.0345	0.666883	0.193175	0.768501	0.193175	3	4	7	1.56674	0.64777
40S ribosomal protein SA	Rpsa	P14206	33	2	2	2	2	0	2	2	7	0.274	0.6618	0.936161	0.35661	0.760592	0.35661	3	4	7	1.31521	0.395298
E3 ubiquitin-protein ligase NEDD4	Nedd4	P46935	103	0	3	3	3	2	3	0	2	0.187	0.4219	0.992376	0.464582	0.735623	0.464582	2	4	6	1.20563	0.269784
Collagen alpha-1(IV) chain	Col4a1	P02463	161	2	2	4	0	3	0	3	2	-0.883	-1.8227	0.118054	0.681545	0.019606	0.019606	4	2	6	0.41354	-1.2739
28S ribosomal protein S6, mitochondrial	Mrps6	P58064	14	0	3	3	3	2	4	2	3	0.228	0.518	0.976315	0.422655	0.747619	0.422655	3	4	7	1.25609	0.328934
39S ribosomal protein L37, mitochondrial	Mrpl37	Q921S7	48	0	0	0	4	0	4	0	6	0.793	1.7528	0.135131	0.030687	0.714973	0.030687	0	3	3	2.21002	1.14406
Fibrinogen beta chain	Fgb	Q8K0E8	55	0	5	3	0	3	0	0	6	0.191	0.4305	0.99113	0.460931	0.736811	0.460931	2	2	4	1.21046	0.275555
Protein disulfide-isomerase	P4hb	P09103	57	0	0	0	0	0	0	0	5	0.321	0.5595	0.967085	0.403893	0.751957	0.403893	0	1	1	1.37851	0.463105
Ig heavy chain V regions TEPC 15/S107/HPCM1/HPCM2/HPCM3	NA	P01787	14	2	2	4	2	0	2	0	3	-0.058	-0.1343	0.99968	0.64071	0.603927	0.603927	2	4	6	0.94365	-0.0836763
Actin-related protein 2/3 complex subunit 4	Arpc4	P59999	20	0	3	0	0	0	0	0	0	0.08	0.1329	1	0.571465	0.681852	0.571465	0	1	1	1.08329	0.115416
3-hydroxyisobutyrate dehydrogenase, mitochondrial	Hibadh	Q99L13	35	0	0	4	3	2	6	2	2	0.081	0.2007	1	0.549397	0.696998	0.549397	3	3	6	1.08437	0.116858
39S ribosomal protein L34, mitochondrial	Mrpl34	Q99N91	11	3	2	2	3	2	2	2	3	-0.104	-0.2476	1	0.662466	0.561005	0.561005	4	4	8	0.901225	-0.15004
Elongation factor 1-delta	Eef1d	P57776	31	0	4	2	3	0	5	0	5	0.856	1.8689	0.098938	0.020823	0.705938	0.020823	1	4	5	2.35373	1.23495
UDP-glucose:glycoprotein glucosyltransferase 1	Uggt1	Q6P5E4	176	0	0	0	3	2	5	3	0	0.07	0.1521	1	0.565409	0.686314	0.565409	2	2	4	1.07251	0.100989
DnaJ homolog subfamily A member 3, mitochondrial	Dnaja3	Q99M87	52	0	0	0	4	3	0	5	5	-0.177	-0.437	1	0.690501	0.476071	0.476071	2	2	4	0.83778	-0.255357
Serine/threonine-protein phosphatase PP1-beta catalytic subunit	Ppp1cb	P62141	37	2	5	2	4	0	5	0	2	0.637	1.4132	0.310571	0.081654	0.744686	0.081654	2	4	6	1.8908	0.918997
T-complex protein 1 subunit alpha	Tcp1	P11983	60	0	0	0	2	0	5	0	6	0.791	1.6161	0.190998	0.046721	0.72663	0.046721	0	3	3	2.2056	1.14117
60S ribosomal protein L36a	Rpl36a	P83882	12	0	0	0	2	0	0	2	0	-0.199	-0.3407	1	0.677442	0.521217	0.521217	1	1	2	0.81955	-0.287096
Striated muscle-specific serine/threonine-protein kinase	Speg	Q62407	354	0	0	0	0	0	4	3	3	0.076	0.1567	1	0.563935	0.687363	0.563935	1	2	3	1.07896	0.109645
60S ribosomal protein L32	Rpl32	P62911	16	0	0	0	3	0	4	0	2	0.578	1.0713	0.628714	0.17945	0.767352	0.17945	0	3	3	1.78247	0.833878
Eukaryotic translation initiation factor 2 subunit 1	Eif2s1	Q6ZWX6	36	0	3	0	0	3	4	0	4	0.364	0.7549	0.89419	0.313272	0.765995	0.313272	1	3	4	1.43907	0.525141
Collagen alpha-2(IV) chain	Col4a2	P08122	167	0	3	3	0	0	0	0	4	0.023	0.0489	1	0.596215	0.660622	0.596215	1	2	3	1.02327	0.033182
Nucleoside diphosphate-linked moiety X motif 8	Nudt8	Q9CR24	23	0	3	0	0	0	5	0	4	0.795	1.5327	0.234069	0.0593	0.734072	0.0593	0	3	3	2.21444	1.14694
Clustered mitochondria protein homolog	Cluh	Q5SW19	148	0	0	0	4	3	3	2	5	0.286	0.6883	0.925792	0.34425	0.762365	0.34425	2	3	5	1.33109	0.412611
Protein-L-isoaspartate(D-aspartate) O-methyltransferase	Pcmt1	P23506	25	4	0	3	0	8	0	3	0	-1.55	-3.0502	0.00047	0.650146	3.5e-05	3.5e-05	4	0	4	0.212248	-2.23618
Beta-centractin	Actr1b	Q8R5C5	42	0	3	2	3	0	2	0	6	0.66	1.4395	0.292087	0.076263	0.742388	0.076263	1	4	5	1.93479	0.952179
Mitochondrial proton/calcium exchanger protein	Letm1	Q9Z2I0	83	0	0	0	2	0	5	0	4	0.683	1.3856	0.330984	0.087614	0.747057	0.087614	0	3	3	1.97981	0.985361
5'-AMP-activated protein kinase subunit gamma-1	Prkag1	O54950	38	0	4	0	3	0	5	0	5	0.981	2.0507	0.057895	0.010679	0.693676	0.010679	0	4	4	2.66712	1.41528
Alpha-1-antitrypsin 1-1	Serpina1a	P07758	46	0	0	0	0	3	0	3	3	-0.477	-0.9422	0.667921	0.717272	0.228394	0.228394	2	1	3	0.620643	-0.688166
Fatty acid-binding protein 5	Fabp5	Q05816	15	2	2	2	0	2	2	2	0	-0.487	-0.9703	0.643047	0.716892	0.216508	0.216508	4	2	6	0.614467	-0.702592
40S ribosomal protein S15	Rps15	P62843	17	0	3	3	4	0	0	0	0	0.119	0.2287	1	0.539732	0.702767	0.539732	1	2	3	1.12637	0.171681
Signal recognition particle 14 kDa protein	Srp14	P16254	13	3	2	0	3	4	2	0	2	-0.207	-0.4741	0.997366	0.694924	0.457731	0.457731	2	4	6	0.81302	-0.298638
Mitochondrial import inner membrane translocase subunit Tim21	Timm21	Q8CCM6	28	0	0	0	0	0	0	0	2	-0.035	-0.0595	0.99844	0.624037	0.628891	0.628891	0	1	1	0.965605	-0.0504943
Integrin-linked protein kinase	Ilk	O55222	51	0	3	4	0	2	5	0	3	0.152	0.3454	0.999721	0.496012	0.72402	0.496012	2	3	5	1.16416	0.21929
Tyrosine-protein phosphatase non-receptor type 11	Ptpn11	P35235	68	0	3	0	4	2	2	2	0	0.22	0.4714	0.984848	0.443283	0.742149	0.443283	2	3	5	1.24608	0.317393
X-ray repair cross-complementing protein 6	Xrcc6	P23475	69	0	5	0	5	0	3	0	4	0.937	1.9981	0.068074	0.013055	0.696986	0.013055	0	4	4	2.55231	1.35181
Polyribonucleotide nucleotidyltransferase 1, mitochondrial	Pnpt1	Q8K1R3	86	0	0	0	0	0	4	0	0	0.188	0.3536	0.999391	0.492738	0.725352	0.492738	0	1	1	1.20683	0.271227
Protein S100-A6	S100a6	P14069	10	3	0	0	0	0	2	0	2	-0.26	-0.5109	0.988107	0.698956	0.43917	0.43917	1	2	3	0.771052	-0.375101
28S ribosomal protein S5, mitochondrial	Mrps5	Q99N87	48	0	0	3	0	0	2	3	3	-0.398	-0.8271	0.771106	0.717183	0.280275	0.280275	2	2	4	0.671662	-0.574193
40S ribosomal protein S5	Rps5	P97461	23	0	3	2	4	0	3	0	0	0.455	0.9048	0.790193	0.245953	0.769872	0.245953	1	3	4	1.57617	0.656426
39S ribosomal protein L41, mitochondrial	Mrpl41	Q9CQN7	15	2	0	0	3	0	3	0	3	0.416	0.8754	0.81444	0.258736	0.769579	0.258736	1	3	4	1.51589	0.600161
Glutamate dehydrogenase 1, mitochondrial	Glud1	P26443	61	0	3	0	2	3	3	2	2	0.122	0.2685	1	0.525438	0.710509	0.525438	2	4	6	1.12975	0.176009
Malonyl-CoA decarboxylase, mitochondrial	Mlycd	Q99J39	55	0	0	0	0	0	3	0	0	0.097	0.1682	1	0.560211	0.68995	0.560211	0	1	1	1.10186	0.139941
Proteasome subunit alpha type-1	Psma1	Q9R1P4	30	0	3	2	0	0	0	0	4	0.311	0.5997	0.956468	0.385445	0.755694	0.385445	1	2	3	1.36479	0.448678
Reticulon-2	Rtn2	O70622	51	0	0	0	4	0	5	0	2	0.69	1.3464	0.361869	0.096626	0.750328	0.096626	0	3	3	1.99372	0.99546
Probable ATP-dependent RNA helicase DDX5	Ddx5	Q61656	69	0	0	0	0	0	0	0	2	-0.128	-0.2115	1	0.655975	0.575344	0.575344	0	1	1	0.879853	-0.184665
28S ribosomal protein S27, mitochondrial	Mrps27	Q8BK72	48	0	0	0	3	2	5	3	3	0.254	0.6117	0.952944	0.379898	0.756722	0.379898	2	3	5	1.28917	0.366445
Ig kappa chain V-II region VKappa167	Gm5153	P01627	13	2	0	3	3	3	3	0	4	-0.049	-0.1145	0.998861	0.636482	0.610792	0.610792	3	3	6	0.952181	-0.0706921
Dynamin-1-like protein	Dnm1l	Q8K1M6	83	0	3	2	0	0	4	0	5	0.557	1.178	0.517716	0.143147	0.76232	0.143147	1	3	4	1.74543	0.803581
Dysferlin	Dysf	Q9ESD7	238	0	0	0	0	2	6	0	4	0.476	1.0136	0.688141	0.201233	0.769008	0.201233	1	2	3	1.60962	0.686723
Maleylacetoacetate isomerase	Gstz1	Q9WVL0	24	0	0	0	0	0	0	0	5	0.359	0.65	0.940439	0.362109	0.759742	0.362109	0	1	1	1.4319	0.517928
Inosine-5'-monophosphate dehydrogenase 2	Impdh2	P24547	56	0	2	0	6	0	4	0	6	1.051	2.1847	0.037096	0.006219	0.686059	0.006219	0	4	4	2.86051	1.51627
60S ribosomal protein L19	Rpl19	P84099	23	0	0	2	0	2	2	2	2	-0.381	-0.7578	0.831674	0.715627	0.313658	0.313658	3	2	5	0.683178	-0.549667
Acyl-protein thioesterase 1	Lypla1	P97823	25	2	3	2	2	0	2	0	0	0.002	0.0041	0.999475	0.608269	0.648111	0.608269	2	3	5	1.002	0.00288539
Fumarylacetoacetate hydrolase domain-containing protein 2A	Fahd2	Q3TC72	35	0	0	3	3	0	2	0	0	-0.101	-0.1953	1	0.65293	0.581576	0.581576	1	2	3	0.903933	-0.145712
Ankyrin-1	Ank1	Q02357	204	0	0	3	0	0	0	0	4	-0.178	-0.3751	1	0.682376	0.50553	0.50553	1	1	2	0.836942	-0.2568
60S ribosomal protein L18	Rpl18	P35980	22	0	0	0	0	2	5	0	2	0.255	0.4764	0.984049	0.441096	0.742767	0.441096	1	2	3	1.29046	0.367887
Adenosylhomocysteinase	Ahcy	P50247	48	0	3	0	0	0	0	3	0	-0.282	-0.5287	0.981755	0.700766	0.430105	0.430105	1	1	2	0.754274	-0.40684
28S ribosomal protein S18a, mitochondrial	Mrps18a	Q99N85	22	0	3	0	0	0	0	0	0	0.03	0.0517	1	0.595435	0.661376	0.595435	0	1	1	1.03045	0.0432809
28S ribosomal protein S26, mitochondrial	Mrps26	Q80ZS3	23	0	0	0	0	3	5	0	4	0.238	0.5298	0.973878	0.417354	0.748903	0.417354	1	2	3	1.26871	0.343361
cAMP-dependent protein kinase catalytic subunit alpha	Prkaca	P05132	41	0	2	0	3	0	3	0	4	0.651	1.284	0.415472	0.112355	0.755227	0.112355	0	4	4	1.91746	0.939194
Transmembrane protein 70, mitochondrial	Tmem70	Q921N7	28	0	0	0	3	0	0	0	3	0.295	0.5544	0.968292	0.406215	0.75145	0.406215	0	2	2	1.34313	0.425595
Ubiquinone biosynthesis O-methyltransferase, mitochondrial	Coq3	Q8BMS4	41	0	0	0	2	0	4	0	0	0.319	0.5904	0.959071	0.389732	0.754869	0.389732	0	2	2	1.37575	0.46022
Mitochondrial carrier homolog 2	Mtch2	Q791V5	33	0	3	0	0	3	3	0	4	0.249	0.5472	0.969934	0.409486	0.750722	0.409486	1	3	4	1.28274	0.359231
Dynactin subunit 3	Dctn3	Q9Z0Y1	21	0	3	3	4	0	2	0	4	0.486	1.1083	0.589937	0.166263	0.765882	0.166263	1	4	5	1.6258	0.70115
Sulfide:quinone oxidoreductase, mitochondrial	Sqor	Q9R112	50	0	0	0	2	2	7	2	3	0.43	0.9568	0.743709	0.224031	0.769838	0.224031	2	3	5	1.53726	0.620359
Calpain-2 catalytic subunit	Capn2	O08529	80	3	0	0	5	0	4	0	4	0.521	1.1796	0.516086	0.142643	0.762227	0.142643	1	3	4	1.68371	0.751644
Serine beta-lactamase-like protein LACTB, mitochondrial	Lactb	Q9EP89	61	0	4	5	0	0	0	0	3	-0.154	-0.349	1	0.678662	0.51748	0.51748	1	2	3	0.857272	-0.222175
Plasminogen activator inhibitor 1 RNA-binding protein	Serbp1	Q9CY58	45	0	0	0	0	0	0	0	2	-0.063	-0.1068	0.998885	0.634803	0.613413	0.613413	0	1	1	0.938943	-0.0908898
60S ribosomal protein L36	Rpl36	P47964	12	0	0	0	2	0	0	2	2	-0.013	-0.0238	0.998846	0.615375	0.639897	0.639897	1	2	3	0.987084	-0.018755
Ras-related protein R-Ras2	Rras2	P62071	23	0	0	2	0	2	2	3	0	-0.648	-1.2485	0.418243	0.707649	0.117747	0.117747	3	1	4	0.523091	-0.934866
Bleomycin hydrolase	Blmh	Q8R016	53	3	2	0	2	5	0	0	0	-0.685	-1.4052	0.313635	0.700253	0.077913	0.077913	2	2	4	0.50409	-0.988246
Cytoplasmic aconitate hydratase	Aco1	P28271	98	0	3	0	0	6	0	0	0	-0.553	-1.108	0.52623	0.71331	0.163189	0.163189	1	1	2	0.575222	-0.79781
39S ribosomal protein L21, mitochondrial	Mrpl21	Q9D1N9	23	0	0	2	3	2	3	0	2	0.11	0.2259	1	0.540713	0.702202	0.540713	2	3	5	1.11628	0.158696
Glutathione S-transferase kappa 1	Gstk1	Q9DCM2	26	0	0	0	3	0	0	2	6	0.403	0.8498	0.833856	0.270062	0.769139	0.270062	1	2	3	1.49631	0.581406
39S ribosomal protein L13, mitochondrial	Mrpl13	Q9D1P0	21	3	3	4	2	0	3	0	2	-0.147	-0.3483	1	0.678559	0.517797	0.517797	2	4	6	0.863294	-0.212076
Cytochrome c-type heme lyase	Hccs	P53702	31	4	0	5	0	0	2	0	0	-0.873	-1.8847	0.097914	0.679183	0.015414	0.015414	2	1	3	0.417697	-1.25947
3-hydroxyisobutyryl-CoA hydrolase, mitochondrial	Hibch	Q8QZS1	43	0	3	0	3	2	3	0	3	0.5	1.0512	0.649627	0.186873	0.768019	0.186873	1	4	5	1.64872	0.721348
T-complex protein 1 subunit theta	Cct8	P42932	60	0	0	0	0	0	0	0	2	-0.128	-0.2098	1	0.65566	0.576004	0.576004	0	1	1	0.879853	-0.184665
28S ribosomal protein S29, mitochondrial	Dap3	Q9ER88	45	0	2	0	0	0	5	0	5	0.748	1.4677	0.273304	0.070789	0.739892	0.070789	0	3	3	2.11277	1.07914
Collagen alpha-6(VI) chain	Col6a6	Q8C6K9	246	0	5	0	0	0	0	0	0	0.301	0.6	0.956382	0.385306	0.75572	0.385306	0	1	1	1.35121	0.434251
Mitofusin-1	Mfn1	Q811U4	84	0	5	0	2	0	5	0	5	1	2.1021	0.049097	0.008721	0.690621	0.008721	0	4	4	2.71828	1.4427
Hydroxymethylglutaryl-CoA lyase, mitochondrial	Hmgcl	P38060	34	0	0	0	3	0	0	2	0	-0.126	-0.2412	1	0.661344	0.563592	0.563592	1	1	2	0.881615	-0.18178
40S ribosomal protein S24	Rps24	P62849	15	0	0	3	2	0	0	0	2	-0.258	-0.5079	0.989088	0.698642	0.440693	0.440693	1	2	3	0.772595	-0.372215
Microtubule-associated proteins 1A/1B light chain 3A	Map1lc3a	Q91VR7	14	0	0	0	3	0	2	0	2	0.384	0.6792	0.92944	0.348495	0.761778	0.348495	0	3	3	1.46815	0.553995
60S ribosomal protein L4	Rpl4	Q9D8E6	47	0	0	0	0	3	3	0	3	0.001	0.0017	0.999353	0.608892	0.647417	0.608892	1	2	3	1.001	0.0014427
Triadin	Trdn	E9Q9K5	78	0	2	2	0	0	3	0	3	0.285	0.591	0.958907	0.389456	0.754923	0.389456	1	3	4	1.32976	0.411168
Carbonic anhydrase 2	Ca2	P00920	29	0	0	0	0	3	3	2	4	0.045	0.0939	1	0.583308	0.672348	0.583308	2	2	4	1.04603	0.0649213
Alcohol dehydrogenase class-3	Adh5	P28474	40	0	0	0	0	0	3	0	4	0.434	0.8082	0.862739	0.288803	0.768054	0.288803	0	2	2	1.54342	0.62613
RNA-binding protein FUS	Fus	P56959	53	0	0	0	0	0	3	0	2	0.232	0.4317	0.990946	0.46042	0.736975	0.46042	0	2	2	1.26112	0.334705
Ras-interacting protein 1	Rasip1	Q3U0S6	104	0	0	0	0	4	0	0	0	-0.734	-1.337	0.357001	0.703539	0.093871	0.093871	1	0	1	0.479985	-1.05894
Catenin alpha-1	Ctnna1	P26231	100	0	3	0	3	0	2	0	4	0.59	1.2385	0.457838	0.124932	0.758488	0.124932	0	4	4	1.80399	0.85119
F-box only protein 40	Fbxo40	P62932	80	0	5	4	0	0	0	0	4	0.149	0.3345	0.999967	0.500324	0.722216	0.500324	1	2	3	1.16067	0.214962
Vacuolar protein sorting-associated protein 29	Vps29	Q9QZ88	20	0	0	0	4	0	3	0	3	0.617	1.1719	0.523947	0.145081	0.762671	0.145081	0	3	3	1.85336	0.890143
Lamin-B1	Lmnb1	P14733	67	0	6	0	0	0	0	0	3	0.585	1.1318	0.565377	0.158217	0.764792	0.158217	0	2	2	1.79499	0.843977
Heterogeneous nuclear ribonucleoproteins A2/B1	Hnrnpa2b1	O88569	37	0	0	0	0	0	0	0	15	1.003	2.1157	0.046943	0.008257	0.689841	0.008257	0	1	1	2.72645	1.44702
Proteasome subunit alpha type-6	Psma6	Q9QUM9	27	0	0	0	0	0	0	0	2	-0.054	-0.0945	0.998674	0.632078	0.61754	0.61754	0	1	1	0.947432	-0.0779055
Ubiquitin-conjugating enzyme E2 variant 2	Ube2v2	Q9D2M8	16	0	0	2	0	0	2	0	2	-0.055	-0.1014	0.998831	0.633614	0.615234	0.615234	1	2	3	0.946485	-0.0793482
ADP-ribosylation factor-like protein 8B	Arl8b	Q9CQW2	22	2	0	2	2	0	2	0	2	-0.047	-0.0945	0.998674	0.632078	0.61754	0.61754	2	3	5	0.954087	-0.0678067
Dihydropyrimidinase-related protein 2	Dpysl2	O08553	62	4	0	2	0	2	2	0	2	-0.572	-1.1478	0.494394	0.711861	0.149379	0.149379	3	2	5	0.564396	-0.825222
Pentatricopeptide repeat domain-containing protein 3, mitochondrial	Ptcd3	Q14C51	78	0	3	0	0	0	0	0	2	0.177	0.3121	1	0.509041	0.718396	0.509041	0	2	2	1.19363	0.255357
NADH dehydrogenase [ubiquinone] 1 beta subcomplex subunit 8, mitochondrial	Ndufb8	Q9D6J5	22	0	0	0	4	0	4	0	0	0.513	0.9613	0.7394	0.222178	0.769802	0.222178	0	2	2	1.67029	0.740103
3-ketoacyl-CoA thiolase A, peroxisomal	Acaa1a	Q921H8	44	0	3	0	0	0	0	0	3	0.292	0.5466	0.970067	0.409758	0.75066	0.409758	0	2	2	1.3391	0.421267
Ig kappa chain V-II region 17S29.1	NA	P03976	12	0	0	2	0	0	0	0	0	-0.375	-0.6418	0.921267	0.710052	0.372051	0.372051	1	0	1	0.687289	-0.541011
Cysteine and glycine-rich protein 1	Csrp1	P97315	21	0	0	0	2	0	0	0	3	0.195	0.3132	1	0.508617	0.718587	0.508617	0	2	2	1.21531	0.281326
Low molecular weight phosphotyrosine protein phosphatase	Acp1	Q9D358	18	0	0	2	2	0	2	0	0	-0.081	-0.1523	1	0.644441	0.597516	0.597516	1	2	3	0.922194	-0.116858
28S ribosomal protein S34, mitochondrial	Mrps34	Q9JIK9	26	0	0	2	2	0	4	0	0	0.141	0.2673	1	0.525879	0.710283	0.525879	1	2	3	1.15142	0.20342
MICOS complex subunit Mic26	Apoo	Q9DCZ4	23	0	2	0	3	0	2	0	2	0.402	0.7775	0.881538	0.302846	0.76696	0.302846	0	4	4	1.49481	0.579963
Four and a half LIM domains protein 2	Fhl2	O70433	32	0	0	0	0	3	0	0	0	-0.629	-1.1102	0.524448	0.713234	0.162406	0.162406	1	0	1	0.533125	-0.907455
LIM and SH3 domain protein 1	Lasp1	Q61792	30	0	0	0	0	0	3	0	3	0.306	0.5951	0.95777	0.387567	0.755289	0.387567	0	2	2	1.35798	0.441465
ATP-dependent RNA helicase A	Dhx9	O70133	149	0	0	0	0	0	0	0	2	-0.135	-0.2186	1	0.657284	0.572571	0.572571	0	1	1	0.873716	-0.194764
Complement C1q subcomponent subunit C	C1qc	Q02105	26	0	0	3	0	0	0	0	4	-0.12	-0.2266	1	0.658738	0.569419	0.569419	1	1	2	0.88692	-0.173123
60S ribosomal protein L27a	Rpl27a	P14115	17	0	0	0	2	0	2	0	2	0.246	0.4597	0.986878	0.44838	0.740675	0.44838	0	3	3	1.2789	0.354903
Eukaryotic translation initiation factor 5A-1	Eif5a	P63242	17	0	0	0	3	0	0	0	6	0.59	1.0985	0.600291	0.169697	0.766302	0.169697	0	2	2	1.80399	0.85119
Peptidyl-prolyl cis-trans isomerase A	Ppia	P17742	18	0	0	0	0	0	0	0	4	0.249	0.463	0.986328	0.446946	0.741095	0.446946	0	1	1	1.28274	0.359231
Aspartyl/asparaginyl beta-hydroxylase	Asph	Q8BSY0	83	0	0	0	0	0	0	0	3	0.031	0.0528	1	0.595128	0.661671	0.595128	0	1	1	1.03149	0.0447235
40S ribosomal protein S30	Fau	P62862	7	0	0	0	2	0	0	0	0	-0.087	-0.1494	0.999995	0.643848	0.598559	0.598559	0	1	1	0.916677	-0.125514
Splicing factor, proline- and glutamine-rich	Sfpq	Q8VIJ6	75	0	0	0	0	2	2	0	0	-0.243	-0.432	1	0.689879	0.478506	0.478506	1	1	2	0.784272	-0.350575
40S ribosomal protein S28	Rps28	P62858	8	0	0	0	0	0	3	2	3	0.168	0.3433	0.999786	0.496846	0.723675	0.496846	1	2	3	1.18294	0.242373
40S ribosomal protein S27	Rps27	Q6ZWU9	9	0	0	0	2	0	3	2	2	0.2	0.3853	0.996768	0.47986	0.730305	0.47986	1	3	4	1.2214	0.288539
10 kDa heat shock protein, mitochondrial	Hspe1	Q64433	11	0	2	2	2	0	3	0	3	0.339	0.6655	0.93476	0.354885	0.760851	0.354885	1	4	5	1.40354	0.489074
DNA damage-binding protein 1	Ddb1	Q3U1J4	127	0	0	0	0	0	3	0	2	0.141	0.2543	1	0.530611	0.707806	0.530611	0	2	2	1.15142	0.20342
Protein FAM162A	Fam162a	Q9D6U8	18	0	0	0	2	0	2	0	4	0.359	0.6851	0.927085	0.345743	0.762161	0.345743	0	3	3	1.4319	0.517928
Aspartate--tRNA ligase, cytoplasmic	Dars1	Q922B2	57	0	0	0	0	2	3	0	4	0.24	0.4853	0.982573	0.437186	0.743849	0.437186	1	2	3	1.27125	0.346247
Cytochrome c oxidase assembly protein COX20, mitochondrial	Cox20	Q9D7J4	13	0	0	2	0	0	4	0	3	0.248	0.4831	0.982949	0.438155	0.743583	0.438155	1	2	3	1.28146	0.357788
Peroxisomal acyl-coenzyme A oxidase 1	Acox1	Q9R0H0	75	0	2	0	2	0	3	0	2	0.433	0.821	0.85413	0.282997	0.768436	0.282997	0	4	4	1.54188	0.624687
Band 3 anion transport protein	Slc4a1	P04919	103	0	0	0	0	0	2	0	2	0.031	0.0564	1	0.594119	0.662634	0.594119	0	2	2	1.03149	0.0447235
Oxidoreductase NAD-binding domain-containing protein 1	Oxnad1	Q8VE38	35	0	0	0	0	2	0	0	3	-0.108	-0.2065	1	0.655044	0.577281	0.577281	1	1	2	0.897628	-0.155811
Ras-related protein Rab-35	Rab35	Q6PHN9	23	0	0	0	0	0	0	0	2	-0.052	-0.0861	0.998353	0.630186	0.620315	0.620315	0	1	1	0.949329	-0.0750201
Nicotinamide phosphoribosyltransferase	Nampt	Q99KQ4	55	0	2	0	3	0	0	0	2	0.38	0.7101	0.916294	0.334085	0.763683	0.334085	0	3	3	1.46228	0.548224
Ubiquitin-conjugating enzyme E2 N	Ube2n	P61089	17	0	0	2	0	0	0	2	0	-0.571	-0.9868	0.628582	0.716606	0.20968	0.20968	2	0	2	0.56496	-0.823779
Bcl-2-like protein 13	Bcl2l13	P59017	47	0	2	2	0	0	4	0	0	0.144	0.2788	1	0.521633	0.712427	0.521633	1	2	3	1.15488	0.207748
Sodium/calcium exchanger 1	Slc8a1	P70414	108	0	0	0	0	2	2	0	0	-0.267	-0.4683	0.998044	0.694255	0.460627	0.460627	1	1	2	0.765673	-0.3852
39S ribosomal protein L9, mitochondrial	Mrpl9	Q99N94	30	2	2	0	0	0	0	0	0	-0.25	-0.4424	1	0.691165	0.473429	0.473429	1	1	2	0.778801	-0.360674
Methylglutaconyl-CoA hydratase, mitochondrial	Auh	Q9JLZ3	33	0	0	0	2	0	2	0	0	0.101	0.1707	1	0.559394	0.690505	0.559394	0	2	2	1.10628	0.145712
Laminin subunit alpha-5	Lama5	Q61001	404	0	3	0	0	0	0	0	0	0.071	0.1235	1	0.574377	0.679616	0.574377	0	1	1	1.07358	0.102431
Adenylosuccinate lyase	Adsl	P54822	55	0	2	0	0	0	2	0	0	0.112	0.1901	1	0.552973	0.69474	0.552973	0	2	2	1.11851	0.161582
Tropomodulin-3	Tmod3	Q9JHJ0	40	0	5	3	0	0	0	0	2	0.122	0.2351	1	0.537477	0.704049	0.537477	1	2	3	1.12975	0.176009
39S ribosomal protein L33, mitochondrial	Mrpl33	Q9CQP0	7	0	0	0	0	0	0	3	0	-0.604	-1.0496	0.5746	0.715137	0.184771	0.184771	1	0	1	0.546621	-0.871388
T-complex protein 1 subunit zeta	Cct6a	P80317	58	0	0	0	0	0	0	0	5	0.295	0.5386	0.971927	0.413382	0.749834	0.413382	0	1	1	1.34313	0.425595
Amine oxidase [flavin-containing] B	Maob	Q8BW75	59	0	0	0	0	0	3	0	3	0.269	0.4954	0.980746	0.432724	0.745047	0.432724	0	2	2	1.30866	0.388085
39S ribosomal protein L43, mitochondrial	Mrpl43	Q99N89	20	0	0	3	0	0	0	0	0	-0.553	-0.9969	0.619775	0.71641	0.20556	0.20556	1	0	1	0.575222	-0.79781
Isoaspartyl peptidase/L-asparaginase	Asrgl1	Q8C0M9	34	0	0	0	0	3	0	0	2	-0.429	-0.7961	0.79855	0.71664	0.295033	0.295033	1	1	2	0.65116	-0.618916
Multifunctional protein ADE2	Paics	Q9DCL9	47	0	0	0	0	0	0	3	5	-0.028	-0.0592	0.998438	0.623966	0.628986	0.628986	1	1	2	0.972388	-0.0403955
Heterogeneous nuclear ribonucleoprotein A3	Hnrnpa3	Q8BG05	40	0	0	0	0	0	0	0	4	0.203	0.3777	0.99758	0.482979	0.729147	0.482979	0	1	1	1.22507	0.292867
Plastin-2	Lcp1	Q61233	70	0	0	0	0	0	0	0	11	0.779	1.662	0.170398	0.04074	0.722617	0.04074	0	1	1	2.17929	1.12386
Serine protease HTRA2, mitochondrial	Htra2	Q9JIY5	49	0	0	0	0	2	0	0	2	-0.264	-0.4523	0.999727	0.692366	0.468561	0.468561	1	1	2	0.767974	-0.380871
Immunoglobulin J chain	Jchain	P01592	18	0	0	0	0	2	0	2	3	-0.254	-0.4815	0.996451	0.695765	0.454023	0.454023	2	1	3	0.775692	-0.366445
Dual specificity protein phosphatase 3	Dusp3	Q9D7X3	20	0	0	0	0	0	0	0	2	-0.045	-0.0787	0.998153	0.628501	0.622731	0.622731	0	1	1	0.955997	-0.0649213
Inorganic pyrophosphatase 2, mitochondrial	Ppa2	Q91VM9	38	0	0	0	0	0	3	0	2	0.193	0.3699	0.998303	0.486159	0.727939	0.486159	0	2	2	1.21288	0.27844
Fragile X mental retardation syndrome-related protein 1	Fxr1	Q61584	76	0	2	0	0	0	0	0	0	-0.074	-0.1233	0.999171	0.638376	0.607765	0.607765	0	1	1	0.928672	-0.106759
Superoxide dismutase [Cu-Zn]	Sod1	P08228	16	0	0	2	0	0	0	0	0	-0.392	-0.6774	0.896107	0.71218	0.35389	0.35389	1	0	1	0.675704	-0.565536
Methyl-CpG-binding protein 2	Mecp2	Q9Z2D6	52	0	0	0	0	0	0	2	3	-0.125	-0.224	1	0.658268	0.570447	0.570447	1	1	2	0.882497	-0.180337
Transmembrane protein 143	Tmem143	Q8VD26	52	0	0	0	0	0	2	0	0	-0.073	-0.1251	0.99927	0.638761	0.607141	0.607141	0	1	1	0.929601	-0.105317
28S ribosomal protein S35, mitochondrial	Mrps35	Q8BJZ4	36	0	0	0	0	0	2	0	0	-0.102	-0.1879	1	0.651512	0.584381	0.584381	0	1	1	0.90303	-0.147155
NADH dehydrogenase [ubiquinone] 1 alpha subcomplex assembly factor 4	Ndufaf4	Q9D1H6	20	0	4	0	0	0	2	0	0	0.259	0.4965	0.980538	0.432237	0.745176	0.432237	0	2	2	1.29563	0.373658
Protein flightless-1 homolog	Flii	Q9JJ28	145	0	0	0	0	0	0	0	3	0.075	0.1277	1	0.573081	0.680619	0.573081	0	1	1	1.07788	0.108202
von Willebrand factor	Vwf	Q8CIZ8	309	0	4	4	0	0	0	0	3	-0.021	-0.0442	0.998114	0.620381	0.633674	0.633674	1	2	3	0.979219	-0.0302966
Actin-related protein 2/3 complex subunit 3	Arpc3	Q9JM76	21	0	0	0	0	0	0	0	2	-0.067	-0.1105	0.998889	0.635613	0.612157	0.612157	0	1	1	0.935195	-0.0966606
Calmodulin-1	Calm1	P0DP26	17	2	0	0	0	0	0	0	5	0.152	0.3016	1	0.513061	0.71655	0.513061	1	1	2	1.16416	0.21929
Complement C1q subcomponent subunit A	C1qa	P98086	26	0	0	3	0	0	0	0	0	-0.547	-0.9771	0.637075	0.71678	0.21368	0.21368	1	0	1	0.578683	-0.789154
40S ribosomal protein S12	Rps12	P63323	15	0	0	0	0	0	2	0	0	-0.046	-0.0812	0.9981	0.629072	0.621917	0.621917	0	1	1	0.955042	-0.066364
60S ribosomal protein L38	Rpl38	Q9JJI8	8	0	0	0	0	2	2	0	0	-0.167	-0.3025	1	0.671593	0.538022	0.538022	1	1	2	0.8462	-0.24093
Signal recognition particle 9 kDa protein	Srp9	P49962	10	0	2	0	0	0	0	0	0	-0.045	-0.0756	0.998252	0.62779	0.623737	0.623737	0	1	1	0.955997	-0.0649213
Guanine nucleotide-binding protein G(I)/G(S)/G(O) subunit gamma-12	Gng12	Q9DAS9	8	0	0	0	2	0	2	0	0	0.1	0.1619	1	0.562258	0.688539	0.562258	0	2	2	1.10517	0.14427
39S ribosomal protein L2, mitochondrial	Mrpl2	Q9D773	33	0	0	0	0	0	0	2	0	-0.441	-0.7366	0.849473	0.714896	0.324133	0.324133	1	0	1	0.643393	-0.636229
MICOS complex subunit Mic27	Apool	Q78IK4	29	0	0	0	0	0	0	0	3	0.055	0.0954	1	0.582864	0.672724	0.582864	0	1	1	1.05654	0.0793482
Acyl-coenzyme A thioesterase 9, mitochondrial	Acot9	Q9R0X4	51	0	0	0	0	0	2	0	2	0.016	0.0279	1	0.601962	0.65486	0.601962	0	2	2	1.01613	0.0230831
NLR family member X1	Nlrx1	Q3TL44	108	0	2	0	0	2	0	0	0	-0.256	-0.4366	1	0.690451	0.476266	0.476266	1	1	2	0.774142	-0.36933
C-1-tetrahydrofolate synthase, cytoplasmic	Mthfd1	Q922D8	101	0	3	0	0	2	0	0	0	-0.105	-0.1851	1	0.650972	0.585436	0.585436	1	1	2	0.900325	-0.151483
Nuclear mitotic apparatus protein 1	Numa1	E9Q7G0	236	0	2	0	0	0	0	0	0	-0.137	-0.222	1	0.657904	0.571235	0.571235	0	1	1	0.87197	-0.197649
Serine/arginine-rich splicing factor 1	Srsf1	Q6PDM2	28	0	0	0	0	0	0	0	5	0.235	0.4205	0.992566	0.465174	0.735427	0.465174	0	1	1	1.26491	0.339033
39S ribosomal protein L46, mitochondrial	Mrpl46	Q9EQI8	32	0	0	0	0	0	0	2	0	-0.45	-0.7096	0.871431	0.713783	0.337622	0.337622	1	0	1	0.637628	-0.649213
Cysteine and histidine-rich domain-containing protein 1	Chordc1	Q9D1P4	37	0	0	0	0	0	3	0	2	0.231	0.4332	0.990713	0.45978	0.737179	0.45978	0	2	2	1.25986	0.333263
Probable leucine--tRNA ligase, mitochondrial	Lars2	Q8VDC0	101	0	0	0	0	0	0	0	3	0.058	0.1019	1	0.580928	0.674344	0.580928	0	1	1	1.05971	0.0836763
SWI/SNF complex subunit SMARCC2	Smarcc2	Q6PDG5	133	0	0	0	2	0	2	0	2	0.147	0.2741	1	0.523375	0.711556	0.523375	0	3	3	1.15835	0.212076
39S ribosomal protein L16, mitochondrial	Mrpl16	Q99N93	29	0	0	3	0	0	0	0	0	-0.571	-0.9988	0.618123	0.716371	0.20479	0.20479	1	0	1	0.56496	-0.823779
39S ribosomal protein L27, mitochondrial	Mrpl27	Q99N92	16	0	0	3	0	0	0	0	0	-0.561	-0.9364	0.673082	0.717333	0.230889	0.230889	1	0	1	0.570638	-0.809352
40S ribosomal protein S6	Rps6	P62754	29	0	3	0	0	0	0	0	0	0.032	0.0535	1	0.594932	0.661859	0.594932	0	1	1	1.03252	0.0461662
Arf-GAP with SH3 domain, ANK repeat and PH domain-containing protein 1	Asap1	Q9QWY8	127	0	0	0	4	0	0	0	3	0.358	0.6667	0.934303	0.354326	0.760934	0.354326	0	2	2	1.43047	0.516485
Rho GTPase-activating protein 24	Arhgap24	Q8C4V1	84	5	0	0	0	0	0	0	0	-0.894	-1.7234	0.154804	0.685566	0.028282	0.028282	1	0	1	0.409016	-1.28977
Phosphoglucomutase-like protein 5	Pgm5	Q8BZF8	62	0	4	0	0	0	0	0	0	0.202	0.3827	0.997058	0.480929	0.729911	0.480929	0	1	1	1.22385	0.291424
Chloride intracellular channel protein 1	Clic1	Q9Z1Q5	27	0	0	0	0	0	0	0	2	-0.051	-0.09	0.99852	0.631068	0.619031	0.619031	0	1	1	0.950279	-0.0735774
Beta-parvin	Parvb	Q9ES46	42	0	0	0	0	0	2	0	3	0.174	0.3162	1	0.50746	0.719106	0.50746	0	2	2	1.19006	0.251029
RNA-splicing ligase RtcB homolog	Rtcb	Q99LF4	55	0	0	0	2	2	0	0	0	-0.289	-0.5128	0.98748	0.699154	0.438205	0.438205	1	1	2	0.749012	-0.416939
Protein disulfide-isomerase A3	Pdia3	P27773	57	0	0	0	0	0	0	0	4	0.208	0.3742	0.997918	0.484409	0.728607	0.484409	0	1	1	1.23121	0.300081
CAP-Gly domain-containing linker protein 1	Clip1	Q922J3	156	0	0	0	3	0	2	0	2	0.343	0.612	0.952854	0.379759	0.756747	0.379759	0	3	3	1.40917	0.494844
Transcription elongation factor, mitochondrial	Tefm	Q5SSK3	42	2	0	0	2	0	0	0	0	-0.195	-0.3458	1	0.678194	0.518925	0.518925	1	1	2	0.822835	-0.281326
Rho GDP-dissociation inhibitor 1	Arhgdia	Q99PT1	23	0	0	0	0	0	0	0	2	-0.064	-0.108	0.998889	0.635066	0.613006	0.613006	0	1	1	0.938005	-0.0923325
Heat shock protein beta-7	Hspb7	P35385	19	0	0	0	3	0	0	0	0	0.089	0.1613	1	0.562452	0.688404	0.562452	0	1	1	1.09308	0.1284
Peptidyl-prolyl cis-trans isomerase F, mitochondrial	Ppif	Q99KR7	22	0	0	0	0	0	2	0	0	-0.082	-0.135	0.999705	0.640857	0.603681	0.603681	0	1	1	0.921272	-0.118301
Mitochondrial amidoxime reducing component 2	Mtarc2	Q922Q1	38	0	0	0	0	0	4	0	0	0.198	0.3737	0.997965	0.484613	0.72853	0.484613	0	1	1	1.21896	0.285654
Complex I intermediate-associated protein 30, mitochondrial	Ndufaf1	Q9CWX2	38	0	0	0	0	0	4	0	0	0.22	0.3854	0.996756	0.479819	0.73032	0.479819	0	1	1	1.24608	0.317393
Protein transport protein Sec23A	Sec23a	Q01405	86	0	0	0	0	0	3	0	0	0.102	0.1859	1	0.554377	0.693834	0.554377	0	1	1	1.10738	0.147155
Proteasome subunit beta type-5	Psmb5	O55234	29	0	0	2	2	0	2	0	0	-0.103	-0.1868	1	0.6513	0.584796	0.584796	1	2	3	0.902127	-0.148598
Ras-related protein Rap-1b	Rap1b	Q99JI6	21	0	0	0	0	0	2	0	2	0.082	0.1415	1	0.56877	0.683866	0.56877	0	2	2	1.08546	0.118301
Proteasome subunit alpha type-3	Psma3	O70435	28	0	3	0	0	0	0	0	0	0.104	0.1847	1	0.554776	0.693574	0.554776	0	1	1	1.1096	0.15004
A-kinase anchor protein 1, mitochondrial	Akap1	O08715	92	0	2	0	0	0	0	0	2	0.069	0.1163	1	0.576583	0.677878	0.576583	0	2	2	1.07144	0.099546
T-complex protein 1 subunit epsilon	Cct5	P80316	60	0	0	0	0	0	3	0	2	0.172	0.3101	1	0.50981	0.718047	0.50981	0	2	2	1.18768	0.248144
Sorbin and SH3 domain-containing protein 1	Sorbs1	Q62417	143	0	0	0	0	0	0	2	0	-0.462	-0.7678	0.82313	0.715929	0.308757	0.308757	1	0	1	0.630022	-0.666525
Nucleophosmin	Npm1	Q61937	33	0	0	0	0	0	0	0	4	0.152	0.2737	1	0.523523	0.711481	0.523523	0	1	1	1.16416	0.21929
Leucine-rich repeat-containing protein 15	Lrrc15	Q80X72	64	0	0	0	0	0	0	5	0	-0.855	-1.4858	0.266802	0.696355	0.061665	0.061665	1	0	1	0.425283	-1.2335
Xin actin-binding repeat-containing protein 1	Xirp1	O70373	123	0	0	4	0	0	0	0	0	-0.717	-1.3048	0.378638	0.705063	0.102137	0.102137	1	0	1	0.488215	-1.03441
Desmoglein-4	Dsg4	Q7TMD7	114	4	0	0	0	0	0	3	0	-0.97	-1.8958	0.094511	0.678771	0.014749	0.014749	2	0	2	0.379083	-1.39941
Glucose-6-phosphate isomerase	Gpi	P06745	63	3	0	0	0	0	0	0	5	-0.061	-0.1231	0.999159	0.638333	0.607834	0.607834	1	1	2	0.940823	-0.0880044
Serpin B5	Serpinb5	P70124	42	7	0	0	0	0	0	0	0	-1.016	-2.0064	0.064792	0.674834	0.009369	0.009369	1	0	1	0.36204	-1.46578
Methylmalonyl-CoA mutase, mitochondrial	Mmut	P16332	83	0	2	0	0	0	0	0	0	-0.119	-0.2066	1	0.655063	0.577243	0.577243	0	1	1	0.887808	-0.171681
ATPase inhibitor, mitochondrial	Atp5if1	O35143	12	0	0	0	0	2	2	0	0	-0.259	-0.443	1	0.691239	0.473135	0.473135	1	1	2	0.771823	-0.373658
Ubiquitin carboxyl-terminal hydrolase 5	Usp5	P56399	96	0	0	0	0	0	0	2	0	-0.412	-0.6963	0.881749	0.713157	0.344319	0.344319	1	0	1	0.662324	-0.59439
Centrosomal protein of 112 kDa	Cep112	Q5PR68	113	2	0	0	0	0	0	0	0	-0.471	-0.7984	0.796527	0.716689	0.293928	0.293928	1	0	1	0.624378	-0.679509
Actin-related protein 3	Actr3	Q99JY9	47	2	0	0	0	0	0	2	0	-0.598	-1.0379	0.584513	0.715453	0.189283	0.189283	2	0	2	0.54991	-0.862732
28S ribosomal protein S28, mitochondrial	Mrps28	Q9CY16	21	0	0	3	0	0	0	0	0	-0.583	-1.0406	0.582219	0.715382	0.188236	0.188236	1	0	1	0.558221	-0.841091
Chromodomain-helicase-DNA-binding protein 6	Chd6	A3KFM7	305	0	0	0	0	0	2	0	0	-0.167	-0.2905	1	0.669673	0.543166	0.543166	0	1	1	0.8462	-0.24093
LIM zinc-binding domain-containing Nebulette	Nebl	Q9DC07	31	0	0	0	0	0	0	0	2	-0.084	-0.1388	0.999821	0.641653	0.602339	0.602339	0	1	1	0.919431	-0.121186
Protein SEC13 homolog	Sec13	Q9D1M0	36	0	0	0	0	0	0	0	2	-0.072	-0.1214	0.999059	0.637969	0.608422	0.608422	0	1	1	0.930531	-0.103874
Arginine--tRNA ligase, cytoplasmic	Rars1	Q9D0I9	76	0	0	0	0	0	2	0	0	-0.073	-0.122	0.999095	0.638098	0.608215	0.608215	0	1	1	0.929601	-0.105317
Cytosol aminopeptidase	Lap3	Q9CPY7	56	0	0	0	0	0	2	0	0	-0.104	-0.1826	1	0.650487	0.586376	0.586376	0	1	1	0.901225	-0.15004
Long-chain fatty acid transport protein 1	Slc27a1	Q60714	71	0	0	2	0	0	0	0	0	-0.495	-0.8458	0.754374	0.717397	0.271522	0.271522	1	0	1	0.609571	-0.714134
Eukaryotic translation initiation factor 2 subunit 2	Eif2s2	Q99L45	38	0	0	0	2	0	0	0	0	-0.074	-0.1253	0.999281	0.638804	0.607072	0.607072	0	1	1	0.928672	-0.106759
Delta-sarcoglycan	Sgcd	P82347	32	0	0	0	2	0	0	0	0	-0.101	-0.1564	1	0.645276	0.596034	0.596034	0	1	1	0.903933	-0.145712
Band 4.1-like protein 2	Epb41l2	O70318	110	0	0	3	0	0	0	0	0	-0.635	-1.095	0.536827	0.71375	0.167856	0.167856	1	0	1	0.529935	-0.916111
Growth factor receptor-bound protein 2	Grb2	Q60631	25	0	0	0	0	0	0	0	2	-0.092	-0.1657	1	0.647152	0.592645	0.592645	0	1	1	0.912105	-0.132728
T-complex protein 1 subunit delta	Cct4	P80315	58	0	0	0	0	0	0	0	3	0.069	0.1277	1	0.573081	0.680619	0.573081	0	1	1	1.07144	0.099546
Protein POF1B	Pof1b	Q8K4L4	68	3	0	0	0	0	0	0	0	-0.585	-0.983	0.631905	0.716676	0.211242	0.211242	1	0	1	0.557106	-0.843977
Gephyrin	Gphn	Q8BUV3	83	0	0	0	0	0	2	0	0	-0.113	-0.1945	1	0.652777	0.581881	0.581881	0	1	1	0.893151	-0.163025
NADH dehydrogenase [ubiquinone] 1 alpha subcomplex assembly factor 3	Ndufaf3	Q9JKL4	21	0	0	0	0	0	0	0	3	0.091	0.1556	1	0.564288	0.687113	0.564288	0	1	1	1.09527	0.131285
Galectin-3	Lgals3	P16110	28	2	0	0	0	0	0	0	0	-0.422	-0.7055	0.874668	0.713595	0.339683	0.339683	1	0	1	0.655734	-0.608817
Matrix metalloproteinase-9	Mmp9	P41245	81	0	0	4	0	0	0	0	0	-0.764	-1.3051	0.378432	0.705049	0.102057	0.102057	1	0	1	0.465799	-1.10222
High mobility group protein B1	Hmgb1	P63158	25	0	0	0	0	0	0	0	6	0.453	0.8075	0.863206	0.289121	0.768032	0.289121	0	1	1	1.57302	0.653541
Heterogeneous nuclear ribonucleoproteins C1/C2	Hnrnpc	Q9Z204	34	0	0	0	0	0	0	0	4	0.246	0.472	0.984738	0.443021	0.742223	0.443021	0	1	1	1.2789	0.354903
Heat shock 70 kDa protein 12B	Hspa12b	Q9CZJ2	76	0	0	0	0	3	0	0	0	-0.605	-1.0205	0.599383	0.715888	0.196098	0.196098	1	0	1	0.546074	-0.87283
T-complex protein 1 subunit eta	Cct7	P80313	60	0	0	0	0	0	0	0	3	0.078	0.1492	1	0.566333	0.685648	0.566333	0	1	1	1.08112	0.11253
Histidine-rich glycoprotein	Hrg	Q9ESB3	59	0	0	0	2	0	0	0	2	0.046	0.0815	1	0.586947	0.669198	0.586947	0	2	2	1.04707	0.066364
Thymosin beta-4	Tmsb4x	P20065	6	0	0	0	0	0	0	0	6	0.43	0.8304	0.847735	0.278756	0.768689	0.278756	0	1	1	1.53726	0.620359
Complement C1q subcomponent subunit B	C1qb	P14106	27	0	0	2	0	0	0	0	0	-0.458	-0.7814	0.811444	0.716298	0.302135	0.302135	1	0	1	0.632547	-0.660754
Heterogeneous nuclear ribonucleoprotein L	Hnrnpl	Q8R081	64	0	0	0	0	0	0	0	2	-0.094	-0.1551	1	0.645012	0.596504	0.596504	0	1	1	0.910283	-0.135613
Peptidyl-tRNA hydrolase ICT1, mitochondrial	Mrpl58	Q8R035	23	0	0	0	0	0	0	2	0	-0.455	-0.8045	0.791153	0.716811	0.291005	0.291005	1	0	1	0.634448	-0.656426
AP-2 complex subunit mu	Ap2m1	P84091	50	0	0	2	0	0	0	0	0	-0.425	-0.7214	0.861887	0.714295	0.331707	0.331707	1	0	1	0.65377	-0.613145
Filamin-A-interacting protein 1	Filip1	Q9CS72	138	2	0	0	0	0	0	0	0	-0.489	-0.842	0.757777	0.71736	0.273291	0.273291	1	0	1	0.613239	-0.705478
LIM and cysteine-rich domains protein 1	Lmcd1	Q8VEE1	41	0	0	0	0	0	0	0	2	-0.128	-0.2198	1	0.657503	0.5721	0.5721	0	1	1	0.879853	-0.184665
Mitochondrial import inner membrane translocase subunit TIM16	Pam16	Q9CQV1	14	0	0	0	2	0	2	0	0	0.146	0.2471	1	0.533202	0.706412	0.533202	0	2	2	1.1572	0.210633
60S acidic ribosomal protein P2	Rplp2	P99027	12	0	0	0	0	0	0	0	4	0.223	0.429	0.991357	0.461569	0.736605	0.461569	0	1	1	1.24982	0.321721
AP-2 complex subunit beta	Ap2b1	Q9DBG3	105	0	0	2	0	0	0	0	0	-0.467	-0.7909	0.803119	0.716525	0.297538	0.297538	1	0	1	0.62688	-0.673739
Myelin basic protein	Mbp	P04370	27	0	0	0	0	0	0	0	3	0.103	0.1838	1	0.555075	0.693379	0.555075	0	1	1	1.10849	0.148598
Calreticulin	Calr	P14211	48	0	0	0	0	0	0	0	5	0.329	0.6061	0.954611	0.382488	0.756247	0.382488	0	1	1	1.38958	0.474647
V-set and immunoglobulin domain-containing protein 8	Vsig8	Q6P3A4	44	0	0	0	0	0	0	5	0	-0.898	-1.5954	0.210619	0.691196	0.04378	0.04378	1	0	1	0.407384	-1.29554
Keratin-associated protein 9-3	Krtap9-3	Q3V2C1	14	0	0	0	0	0	0	4	0	-0.72	-1.3069	0.377198	0.704964	0.101582	0.101582	1	0	1	0.486752	-1.03874
Fibrinogen alpha chain	Fga	E9PV24	87	0	0	2	0	0	0	0	0	-0.451	-0.7481	0.839919	0.715308	0.318438	0.318438	1	0	1	0.636991	-0.650655
NEDD8-conjugating enzyme Ubc12	Ube2m	P61082	21	0	0	0	0	0	2	0	0	-0.05	-0.0823	0.998161	0.629323	0.621559	0.621559	0	1	1	0.951229	-0.0721348
28S ribosomal protein S23, mitochondrial	Mrps23	Q8VE22	20	0	0	0	0	0	0	0	2	-0.058	-0.0991	0.998789	0.633104	0.616005	0.616005	0	1	1	0.94365	-0.0836763
Hypoxia up-regulated protein 1	Hyou1	Q9JKR6	111	0	0	0	0	0	2	0	0	-0.074	-0.1253	0.999281	0.638804	0.607072	0.607072	0	1	1	0.928672	-0.106759
Transmembrane emp24 domain-containing protein 10	Tmed10	Q9D1D4	25	0	0	0	0	0	2	0	0	-0.122	-0.2017	1	0.654143	0.57913	0.57913	0	1	1	0.885148	-0.176009
Flotillin-1	Flot1	O08917	48	0	0	0	0	0	0	0	2	-0.101	-0.1685	1	0.647711	0.591616	0.591616	0	1	1	0.903933	-0.145712
[3-methyl-2-oxobutanoate dehydrogenase [lipoamide]] kinase, mitochondrial	Bckdk	O55028	47	0	0	0	0	0	2	0	0	-0.05	-0.0835	0.998225	0.629596	0.621167	0.621167	0	1	1	0.951229	-0.0721348
Eukaryotic translation initiation factor 4 gamma 1	Eif4g1	Q6NZJ6	176	0	0	0	0	0	0	0	3	0.047	0.0871	1	0.585311	0.670629	0.585311	0	1	1	1.04812	0.0678067
Proliferation-associated protein 2G4	Pa2g4	P50580	44	0	0	0	0	0	0	0	4	0.18	0.334	0.999973	0.50052	0.722132	0.50052	0	1	1	1.19722	0.259685
Coatomer subunit beta	Copb1	Q9JIF7	107	0	0	0	0	0	2	0	0	-0.131	-0.2143	1	0.656493	0.574253	0.574253	0	1	1	0.877218	-0.188993
Glycerophosphocholine phosphodiesterase GPCPD1	Gpcpd1	Q8C0L9	77	0	0	0	0	0	2	0	0	-0.082	-0.1356	0.999725	0.640983	0.60347	0.60347	0	1	1	0.921272	-0.118301
Chromobox protein homolog 3	Cbx3	P23198	21	0	0	0	0	0	0	0	2	-0.067	-0.1143	0.998863	0.636438	0.61086	0.61086	0	1	1	0.935195	-0.0966606
WD repeat-containing protein 1	Wdr1	O88342	66	0	0	0	0	0	0	0	2	-0.108	-0.1807	1	0.650116	0.587087	0.587087	0	1	1	0.897628	-0.155811
Coronin-1A	Coro1a	O89053	51	0	0	0	0	0	0	0	4	0.159	0.2908	1	0.517146	0.714616	0.517146	0	1	1	1.17234	0.229389
Adenylyl cyclase-associated protein 1	Cap1	P40124	52	0	0	0	0	0	0	0	3	0.087	0.1621	1	0.562193	0.688584	0.562193	0	1	1	1.0909	0.125514
Prothymosin alpha	Ptma	P26350	12	0	0	0	0	0	0	0	4	0.219	0.4015	0.994812	0.473149	0.73271	0.473149	0	1	1	1.24483	0.31595
Serine hydroxymethyltransferase, mitochondrial	Shmt2	Q9CZN7	56	0	0	0	0	0	0	0	4	0.201	0.3797	0.997376	0.48216	0.729454	0.48216	0	1	1	1.22262	0.289982
Dual specificity protein phosphatase 14	Dusp14	Q9JLY7	22	0	0	0	0	0	0	3	0	-0.609	-1.0935	0.538057	0.7138	0.1684	0.1684	1	0	1	0.543894	-0.878601
Heterogeneous nuclear ribonucleoprotein D-like	Hnrnpdl	Q9Z130	34	0	0	0	0	0	0	0	2	-0.105	-0.1902	1	0.651954	0.583512	0.583512	0	1	1	0.900325	-0.151483
Bis(5'-nucleosyl)-tetraphosphatase [asymmetrical]	Nudt2	P56380	17	0	0	0	0	0	2	0	0	-0.075	-0.1265	0.999343	0.639059	0.606655	0.606655	0	1	1	0.927743	-0.108202
Transgelin-2	Tagln2	Q9WVA4	22	0	0	0	0	0	0	0	3	0.074	0.132	1	0.571745	0.681639	0.571745	0	1	1	1.07681	0.106759
Heterogeneous nuclear ribonucleoprotein D0	Hnrnpd	Q60668	38	0	0	0	0	0	0	0	3	0.09	0.1571	1	0.563806	0.687454	0.563806	0	1	1	1.09417	0.129843
Thymosin beta-10	Tmsb10	Q6ZWY8	5	0	0	0	0	0	0	0	3	0.076	0.131	1	0.572057	0.681403	0.572057	0	1	1	1.07896	0.109645
Proteasome activator complex subunit 1	Psme1	P97371	29	0	0	0	0	0	0	0	3	0.064	0.1079	1	0.579128	0.675826	0.579128	0	1	1	1.06609	0.0923325
Proliferating cell nuclear antigen	Pcna	P17918	29	0	0	0	0	0	0	0	2	-0.095	-0.1556	1	0.645114	0.596324	0.596324	0	1	1	0.909373	-0.137056
Proteasome activator complex subunit 2	Psme2	P97372	27	0	0	0	0	0	0	0	2	-0.033	-0.0561	0.99841	0.623231	0.629964	0.629964	0	1	1	0.967539	-0.0476089
COP9 signalosome complex subunit 4	Cops4	O88544	46	0	0	0	0	0	0	0	2	-0.116	-0.2082	1	0.655362	0.576624	0.576624	0	1	1	0.890475	-0.167353
Coactosin-like protein	Cotl1	Q9CQI6	16	0	0	0	0	0	0	0	2	-0.011	-0.0179	0.998899	0.613896	0.641662	0.641662	0	1	1	0.98906	-0.0158696
Enhancer of rudimentary homolog	Erh	P84089	12	0	0	0	0	0	0	0	2	-0.045	-0.0823	0.998161	0.629323	0.621559	0.621559	0	1	1	0.955997	-0.0649213
Histone H1.5	H1-5	P43276	23	0	0	0	0	0	0	0	2	-0.067	-0.1075	0.998888	0.634957	0.613176	0.613176	0	1	1	0.935195	-0.0966606
Tripartite motif-containing protein 29	Trim29	Q8R2Q0	66	2	0	0	0	0	0	0	0	-0.46	-0.764	0.826382	0.715818	0.310616	0.310616	1	0	1	0.631284	-0.66364

## Sheet: countdata
ProteinName	GeneName	Accession	Weight	52753 SpC	52754 SpC	52755 SpC	52756 SpC	52757 SpC	52758 SpC	52759 SpC	52760 SpC	IgG_1.1	IgG_2.1	IgG_3.1	IgG_4.1	IP_1.1	IP_2.1	IP_3.1	IP_4.1	nonzero_IgG	nonzero_IP	nonzero	out.p.value	out.fc	FDR	BH	Ratio(IP/IgG)	Log2(Ratio)
Ig gamma-1 chain C region secreted form	Ighg1	P01868	36	662	1158	1300	1280	656	1032	1074	1073	974.583	1183.38	1337.06	1438.16	650.331	967.006	930.099	858.926	4	4	8	0.001692	-1.44749	0.0385776	0.0385776	0.690852	-0.533551
Immunoglobulin kappa constant	Igkc	P01837	12	384	711	886	790	395	651	707	742	565.317	726.586	911.256	887.617	391.587	610.001	612.272	593.964	4	4	8	0.00127365	-1.3975	0.0305677	0.0305677	0.715564	-0.482848
Myosin-6	Myh6	Q02566	224	268	537	216	338	379	338	155	435	394.544	548.771	222.157	379.765	375.725	316.713	134.232	348.213	4	4	8	0.0488717	-1.33714	0.247314	0.247314	0.747864	-0.419152
Stress-70 protein, mitochondrial	Hspa9	P38647	73	256	305	413	319	280	292	345	335	376.878	311.686	424.773	358.417	277.581	273.61	298.775	268.164	4	4	8	0.00178424	-1.31489	0.0396884	0.0396884	0.760518	-0.394946
ATP synthase subunit alpha, mitochondrial	Atp5f1a	Q03265	60	223	251	266	232	295	329	379	361	328.296	256.502	273.582	260.667	292.451	308.28	328.219	288.977	4	4	8	0.173291	1.09728	0.445188	0.445188	1.09728	0.133926
Desmoplakin	Dsp	E9Q557	333	370	239	355	320	284	261	200	90	544.707	244.239	365.119	359.541	281.546	244.563	173.203	72.0442	4	4	8	0.0419031	-2.01219	0.22785	0.22785	0.496972	-1.00876
Sarcoplasmic/endoplasmic reticulum calcium ATPase 2	Atp2a2	O55143	115	122	195	246	198	235	273	300	298	179.606	199.275	253.012	222.466	232.969	255.807	259.804	238.546	4	4	8	0.0365556	1.15008	0.209678	0.209678	1.15008	0.20173
Myosin-9	Myh9	Q8VDD5	226	178	338	132	230	319	197	114	314	262.048	345.409	135.763	258.42	316.244	184.593	98.7256	251.354	4	4	8	0.250788	-1.20924	0.506015	0.506015	0.826964	-0.274103
Myosin-7	Myh7	Q91Z83	223	0	179	0	0	135	0	0	0	0	182.924	0	0	133.833	0	0	0	1	1	2	0.526606	-1.54125	0.692024	0.692024	0.648822	-0.624105
ADP/ATP translocase 1	Slc25a4	P48962	33	141	169	209	162	194	235	293	247	207.577	172.705	214.958	182.018	192.324	220.2	253.742	197.721	4	4	8	0.0988866	1.12144	0.332785	0.332785	1.12144	0.165347
ATP synthase subunit beta, mitochondrial	Atp5f1b	P56480	56	132	166	179	152	197	229	267	245	194.328	169.639	184.102	170.782	195.298	214.578	231.226	196.12	4	4	8	0.0191444	1.17508	0.151823	0.151823	1.17508	0.232761
Endoplasmic reticulum chaperone BiP	Hspa5	P20029	72	138	201	250	186	151	155	193	177	203.161	205.406	257.126	208.983	149.695	145.238	167.141	141.687	4	4	8	0.000268943	-1.45424	0.0102198	0.0102198	0.687643	-0.540269
Myosin-11	Myh11	O08638	227	131	259	93	149	213	142	61	204	192.856	264.677	95.651	167.411	211.159	133.057	52.8269	163.3	4	4	8	0.133172	-1.33525	0.37954	0.37954	0.748921	-0.417115
Actin, alpha cardiac muscle 1	Actc1	P68033	42	148	195	110	137	180	161	144	197	217.883	199.275	113.136	153.928	178.445	150.86	124.706	157.697	4	4	8	0.253898	-1.10225	0.507438	0.507438	0.907236	-0.14045
Aconitate hydratase, mitochondrial	Aco2	Q99KI0	85	101	139	162	131	148	171	195	172	148.69	142.047	166.618	147.187	146.721	160.231	168.873	137.684	4	4	8	0.784561	1.01595	0.888845	0.888845	1.01595	0.0228238
3-ketoacyl-CoA thiolase, mitochondrial	Acaa2	Q8BWT1	42	108	151	139	127	146	171	200	175	158.995	154.31	142.962	142.693	144.738	160.231	173.203	140.086	4	4	8	0.493528	1.0405	0.666743	0.666743	1.0405	0.0572708
Actin, cytoplasmic 1	Actb	P60710	42	150	148	58	103	123	101	43	122	220.827	151.244	59.6533	115.727	121.937	94.6392	37.2386	97.6599	4	4	8	0.00466577	-1.5308	0.0653653	0.0653653	0.653253	-0.614287
Succinate dehydrogenase [ubiquinone] flavoprotein subunit, mitochondrial	Sdha	Q8K2B3	73	70	118	134	130	164	168	202	199	103.053	120.587	137.82	146.064	162.583	157.42	174.935	159.298	4	4	8	0.00925079	1.27545	0.100437	0.100437	1.27545	0.351001
Trifunctional enzyme subunit alpha, mitochondrial	Hadha	Q8BMS1	83	91	125	151	125	139	149	183	178	133.968	127.74	155.304	140.446	137.799	139.616	158.481	142.487	4	4	8	0.536161	1.03774	0.69954	0.69954	1.03774	0.0534399
Glycogen phosphorylase, muscle form	Pygm	Q9WUB3	97	57	91	97	96	137	175	208	214	83.9143	92.9948	99.765	107.862	135.816	163.979	180.131	171.305	4	4	8	0.000143339	1.69868	0.00645792	0.00645792	1.69868	0.764416
Heat shock cognate 71 kDa protein	Hspa8	P63017	71	105	129	157	133	112	111	117	155	154.579	131.828	161.475	149.434	111.032	104.009	101.324	124.076	4	4	8	0.00363911	-1.35507	0.0592655	0.0592655	0.737972	-0.438363
Junction plakoglobin	Jup	Q02257	82	141	124	168	171	159	145	104	63	207.577	126.718	172.789	192.13	157.626	135.868	90.0655	50.4309	4	4	8	0.0816186	-1.6722	0.319469	0.319469	0.598014	-0.741749
Isocitrate dehydrogenase [NADP], mitochondrial	Idh2	P54071	51	58	80	115	78	117	125	159	152	85.3865	81.7537	118.278	87.6381	115.989	117.128	137.696	121.675	4	4	8	0.00361643	1.31671	0.0592655	0.0592655	1.31671	0.396942
Glyceraldehyde-3-phosphate dehydrogenase	Gapdh	P16858	36	98	105	116	110	119	124	142	133	144.274	107.302	119.307	123.592	117.972	116.191	122.974	106.465	4	4	8	0.390746	-1.05783	0.618242	0.618242	0.945334	-0.0811044
14-3-3 protein beta/alpha	Ywhab	Q9CQV8	28	14	9	9	12	162	258	277	290	20.6105	9.19729	9.25655	13.4828	160.6	241.752	239.886	232.142	4	4	8	1.77e-08	16.492	4.03e-06	4.03e-06	16.492	4.0437
ADP/ATP translocase 2	Slc25a5	P51881	33	46	60	76	37	87	95	145	137	67.7203	61.3152	78.1664	41.5719	86.2482	89.017	125.572	109.667	4	4	8	0.0119453	1.66506	0.111164	0.111164	1.66506	0.735575
Keratin, type II cytoskeletal 2 oral	Krt76	Q3UV17	63	91	80	93	42	75	60	7	0	133.968	81.7537	95.651	47.1897	74.3519	56.2213	6.0621	0	4	3	7	0.000355334	-4	0.0123518	0.0123518	0.25	-2
2-oxoglutarate dehydrogenase, mitochondrial	Ogdh	Q60597	116	45	76	123	81	109	144	187	193	66.2481	77.666	126.506	91.0088	108.058	134.931	161.945	154.495	4	4	8	0.00163364	1.5456	0.038202	0.038202	1.5456	0.628171
von Willebrand factor A domain-containing protein 8	Vwa8	Q8CC88	213	15	23	42	35	125	252	244	221	22.0827	23.5042	43.1972	39.3248	123.92	236.129	211.307	176.908	4	4	8	1.43e-05	5.79645	0.00118424	0.00118424	5.79645	2.53517
Very long-chain specific acyl-CoA dehydrogenase, mitochondrial	Acadvl	P50544	71	59	81	103	117	129	138	147	148	86.8586	82.7756	105.936	131.457	127.885	129.309	127.304	118.473	4	4	8	0.0910023	1.24154	0.3273	0.3273	1.24154	0.312125
Trifunctional enzyme subunit beta, mitochondrial	Hadhb	Q99JY0	51	66	91	108	98	113	121	144	135	97.1639	92.9948	111.079	110.109	112.024	113.38	124.706	108.066	4	4	8	0.123167	1.11147	0.368231	0.368231	1.11147	0.152471
Cytochrome b-c1 complex subunit 2, mitochondrial	Uqcrc2	Q9DB77	48	74	90	104	74	112	117	156	145	108.941	91.9729	106.965	83.1438	111.032	109.632	135.098	116.071	4	4	8	0.0203929	1.2193	0.154506	0.154506	1.2193	0.286049
Spectrin alpha chain, erythrocytic 1	Spta1	P08032	280	113	144	78	110	186	73	39	70	166.356	147.157	80.2234	123.592	184.393	68.4026	33.7745	56.0343	4	4	8	0.0363777	-1.72705	0.209678	0.209678	0.579022	-0.788309
MICOS complex subunit Mic60	Immt	Q8CAQ8	84	43	92	109	73	97	115	143	135	63.3038	94.0167	112.107	82.0203	96.1618	107.757	123.84	108.066	4	4	8	0.0156145	1.22768	0.133088	0.133088	1.22768	0.295934
Ig gamma-3 chain C region	NA	P03987	44	52	110	135	146	56	88	116	135	76.5534	112.411	138.848	164.041	55.5161	82.4579	100.458	108.066	4	4	8	0.00108786	-1.42147	0.0268142	0.0268142	0.703495	-0.507389
General transcription factor II-I	Gtf2i	Q9ESZ8	112	69	105	120	98	82	86	107	97	101.58	107.302	123.421	110.109	81.2914	80.5838	92.6635	77.6476	4	4	8	0.00244385	-1.33643	0.0474211	0.0474211	0.748262	-0.418385
Spectrin beta chain, erythrocytic	Sptb	P15508	245	81	132	54	100	153	55	51	131	119.247	134.894	55.5393	112.357	151.678	51.5362	44.1667	104.864	4	4	8	0.294359	-1.27064	0.525445	0.525445	0.787005	-0.345555
Myoglobin	Mb	P04247	17	59	77	88	80	87	116	117	114	86.8586	78.6879	90.5085	89.8852	86.2482	108.694	101.324	91.2559	4	4	8	0.134307	1.12695	0.381582	0.381582	1.12695	0.172425
Myosin-10	Myh10	Q61879	229	60	122	44	68	126	56	42	100	88.3308	124.674	45.2542	76.4024	124.911	52.4732	36.3726	80.0491	4	4	8	0.472321	-1.17709	0.648729	0.648729	0.849554	-0.235222
Vimentin	Vim	P20152	54	22	47	13	32	122	170	135	175	32.388	48.0303	13.3706	35.9541	120.946	159.294	116.912	140.086	4	4	8	0.000148702	4.28702	0.00645792	0.00645792	4.28702	2.09997
Single-stranded DNA-binding protein, mitochondrial	Ssbp1	Q9CYR0	17	61	97	91	80	72	97	90	77	89.803	99.1263	93.594	89.8852	71.3778	90.8911	77.9413	61.6378	4	4	8	0.0184102	-1.23378	0.147282	0.147282	0.810515	-0.30309
Creatine kinase S-type, mitochondrial	Ckmt2	Q6P8J7	47	62	63	68	62	91	73	97	83	91.2752	64.381	69.9384	69.6611	90.2137	68.4026	84.0034	66.4407	4	4	8	0.542773	1.05163	0.704138	0.704138	1.05163	0.0726321
ATP synthase subunit O, mitochondrial	Atp5po	Q9DB20	23	57	74	76	97	82	94	111	110	83.9143	75.6221	78.1664	108.986	81.2914	88.08	96.1276	88.054	4	4	8	0.781962	1.02502	0.887002	0.887002	1.02502	0.0356566
Myosin-binding protein C, cardiac-type	Mybpc3	O70468	141	51	72	87	70	83	84	100	108	75.0812	73.5783	89.48	78.6496	82.2828	78.7098	86.6014	86.453	4	4	8	0.523778	1.0517	0.690297	0.690297	1.0517	0.0727187
Spectrin beta chain, non-erythrocytic 1	Sptbn1	Q62261	274	60	116	46	81	123	52	43	89	88.3308	118.543	47.3112	91.0088	121.937	48.7251	37.2386	71.2437	4	4	8	0.27015	-1.28514	0.52387	0.52387	0.778127	-0.361923
Glycogen phosphorylase, brain form	Pygb	Q8CI94	97	47	55	67	62	74	84	105	118	69.1925	56.2056	68.9099	69.6611	73.3606	78.7098	90.9315	94.4579	4	4	8	0.0111346	1.29199	0.105779	0.105779	1.29199	0.369595
ATP synthase subunit gamma, mitochondrial	Atp5f1c	Q91VR2	33	67	76	74	64	73	83	98	85	98.6361	77.666	76.1094	71.9082	72.3692	77.7728	84.8694	68.0417	4	4	8	0.517576	-1.05376	0.6841	0.6841	0.94898	-0.07555
NADH-ubiquinone oxidoreductase 75 kDa subunit, mitochondrial	Ndufs1	Q91VD9	80	39	74	81	65	82	99	99	90	57.415	75.6221	83.3089	73.0318	81.2914	92.7651	85.7354	72.0442	4	4	8	0.123893	1.13352	0.368231	0.368231	1.13352	0.180807
Cysteine and glycine-rich protein 3	Csrp3	P50462	21	57	78	88	76	69	89	94	95	83.9143	79.7098	90.5085	85.391	68.4038	83.3949	81.4053	76.0466	4	4	8	0.264742	-1.09232	0.518121	0.518121	0.91548	-0.1274
Spectrin alpha chain, non-erythrocytic 1	Sptan1	P16546	285	64	108	57	84	122	61	33	55	94.2195	110.367	58.6248	94.3795	120.946	57.1583	28.5785	44.027	4	4	8	0.0776548	-1.56053	0.314671	0.314671	0.640807	-0.642037
Myosin-4	Myh4	Q5SX39	223	46	56	48	24	75	0	0	0	67.7203	57.2276	49.3683	26.9656	74.3519	0	0	0	4	1	5	9.7e-07	-5.2231	0.00014746	0.00014746	0.191457	-2.38491
Carnitine O-palmitoyltransferase 1, muscle isoform	Cpt1b	Q924X2	88	33	55	72	50	65	76	99	94	48.582	56.2056	74.0524	56.1783	64.4383	71.2136	85.7354	75.2461	4	4	8	0.0140808	1.25826	0.128417	0.128417	1.25826	0.331427
Phosphate carrier protein, mitochondrial	Slc25a3	Q8VEM8	40	42	50	69	46	65	79	95	87	61.8316	51.096	70.9669	51.684	64.4383	74.0247	82.2713	69.6427	4	4	8	0.0278045	1.24347	0.181384	0.181384	1.24347	0.314374
14-3-3 protein theta	Ywhaq	P68254	28	0	0	0	6	30	102	124	139	0	0	0	6.74139	29.7408	95.5762	107.386	111.268	1	4	5	1.7e-11	57.475	7.73e-09	7.73e-09	57.475	5.84486
Acyl-coenzyme A thioesterase 13	Acot13	Q9CQR4	15	44	52	58	55	47	64	48	47	64.7759	53.1399	59.6533	61.7961	46.5939	59.9694	41.5687	37.6231	4	4	8	0.0769286	-1.29215	0.313552	0.313552	0.773904	-0.369774
Succinate--CoA ligase [ADP/GDP-forming] subunit alpha, mitochondrial	Suclg1	Q9WUM5	36	46	52	75	48	66	69	86	77	67.7203	53.1399	77.1379	53.9311	65.4297	64.6545	74.4772	61.6378	4	4	8	0.50328	1.06126	0.673289	0.673289	1.06126	0.0857835
Immunoglobulin heavy constant mu	Ighm	P01872	50	34	58	69	64	42	57	74	63	50.0541	59.2714	70.9669	71.9082	41.6371	53.4102	64.085	50.4309	4	4	8	0.0538735	-1.204	0.25642	0.25642	0.830562	-0.267841
ATP-dependent 6-phosphofructokinase, muscle type	Pfkm	P47857	85	25	40	66	47	54	59	74	71	36.8045	40.8768	67.8814	52.8076	53.5334	55.2843	64.085	56.8348	4	4	8	0.167868	1.14357	0.436779	0.436779	1.14357	0.193548
Elongation factor 1-alpha 2	Eef1a2	P62631	50	58	61	59	56	61	60	69	67	85.3865	62.3372	60.6818	62.9197	60.4729	56.2213	59.755	53.6329	4	4	8	0.0936634	-1.16517	0.3273	0.3273	0.858244	-0.220541
Beta-enolase	Eno3	P21550	47	29	32	54	35	51	57	63	60	42.6932	32.7015	55.5393	39.3248	50.5593	53.4102	54.5589	48.0294	4	4	8	0.0872875	1.21252	0.326255	0.326255	1.21252	0.278005
Ig gamma-2A chain C region secreted form	NA	P01864	37	30	79	66	54	39	71	68	60	44.1654	80.7317	67.8814	60.6725	38.663	66.5285	58.889	48.0294	4	4	8	0.0533277	-1.1968	0.25642	0.25642	0.835561	-0.259183
Keratin, type II cytoskeletal 74	Krt74	Q6IFZ9	55	0	0	11	0	0	0	0	0	0	0	11.3136	0	0	0	0	0	1	0	1	0.0593543	-10000	0.271228	0.271228	0.0001	-13.2877
Elongation factor Tu, mitochondrial	Tufm	Q8BFR5	50	32	37	56	42	73	72	93	76	47.1098	37.8111	57.5963	47.1897	72.3692	67.4655	80.5393	60.8373	4	4	8	0.00318344	1.47874	0.0569274	0.0569274	1.47874	0.564372
Ig gamma-2B chain C region	Igh-3	P01867	44	30	73	66	65	23	60	62	57	44.1654	74.6002	67.8814	73.0318	22.8013	56.2213	53.6929	45.628	4	4	8	0.00473039	-1.444	0.0653653	0.0653653	0.69252	-0.530073
Acetyl-CoA acetyltransferase, mitochondrial	Acat1	Q8QZT1	45	52	47	50	34	59	51	71	58	76.5534	48.0303	51.4253	38.2012	58.4902	47.7881	61.487	46.4285	4	4	8	0.834063	1.02083	0.920902	0.920902	1.02083	0.0297377
ATP synthase F(0) complex subunit B1, mitochondrial	Atp5pb	Q9CQQ7	29	39	42	53	38	58	67	81	74	57.415	42.9207	54.5108	42.6955	57.4988	62.7804	70.1471	59.2363	4	4	8	0.0249928	1.28182	0.174061	0.174061	1.28182	0.358193
Cytochrome b-c1 complex subunit Rieske, mitochondrial	Uqcrfs1	Q9CR68	29	35	49	49	34	52	67	75	70	51.5263	50.0741	50.3968	38.2012	51.5507	62.7804	64.9511	56.0343	4	4	8	0.0343453	1.25256	0.203395	0.203395	1.25256	0.324877
Nascent polypeptide-associated complex subunit alpha, muscle-specific form	Naca	P70670	220	33	62	42	62	77	37	48	80	48.582	63.3591	43.1972	69.6611	76.3346	34.6698	41.5687	64.0392	4	4	8	0.715333	-1.06819	0.845056	0.845056	0.936159	-0.0951746
Medium-chain specific acyl-CoA dehydrogenase, mitochondrial	Acadm	P45952	46	36	44	48	39	51	57	72	73	52.9985	44.9645	49.3683	43.8191	50.5593	53.4102	62.353	58.4358	4	4	8	0.0823074	1.19073	0.320788	0.320788	1.19073	0.251851
14-3-3 protein zeta/delta	Ywhaz	P63101	28	22	11	11	17	27	32	35	46	32.388	11.2411	11.3136	19.1006	26.7667	29.9847	30.3105	36.8226	4	4	8	0.052412	1.77623	0.25642	0.25642	1.77623	0.828822
Golgin subfamily A member 4	Golga4	Q91VW5	258	2	90	107	103	0	39	45	32	2.94436	91.9729	110.05	115.727	0	36.5438	38.9706	25.6157	4	3	7	0.000729456	-3.1911	0.0195666	0.0195666	0.313372	-1.67405
Pyruvate dehydrogenase E1 component subunit alpha, somatic form, mitochondrial	Pdha1	P35486	43	43	51	48	39	54	53	62	58	63.3038	52.118	49.3683	43.8191	53.5334	49.6621	53.6929	46.4285	4	4	8	0.874581	-1.01589	0.944284	0.944284	0.984356	-0.0227473
Heat shock-related 70 kDa protein 2	Hspa2	P17156	70	28	0	0	33	0	0	0	0	41.2211	0	0	37.0777	0	0	0	0	2	0	2	1.26e-05	-10000	0.00115034	0.00115034	0.0001	-13.2877
Succinate dehydrogenase [ubiquinone] iron-sulfur subunit, mitochondrial	Sdhb	Q9CQA3	32	32	40	42	42	47	52	59	52	47.1098	40.8768	43.1972	47.1897	46.5939	48.7251	51.0948	41.6255	4	4	8	0.592155	1.0583	0.747986	0.747986	1.0583	0.0817505
Progranulin	Grn	P28798	63	17	68	93	81	19	36	35	45	25.0271	69.4906	95.651	91.0088	18.8358	33.7328	30.3105	36.0221	4	4	8	0.00261361	-2.3841	0.0486451	0.0486451	0.419446	-1.25344
Hemoglobin subunit alpha	Hba	P01942	15	27	43	52	40	45	53	75	68	39.7489	43.9426	53.4823	44.9426	44.6112	49.6621	64.9511	54.4334	4	4	8	0.109342	1.17611	0.349556	0.349556	1.17611	0.234029
Long-chain-fatty-acid--CoA ligase 1	Acsl1	P41216	78	15	40	53	40	55	60	68	70	22.0827	40.8768	54.5108	44.9426	54.5247	56.2213	58.889	56.0343	4	4	8	0.0440513	1.37476	0.231002	0.231002	1.37476	0.459178
Succinate--CoA ligase [ADP-forming] subunit beta, mitochondrial	Sucla2	Q9Z2I9	50	28	32	40	41	47	55	65	58	41.2211	32.7015	41.1402	46.0662	46.5939	51.5362	56.2909	46.4285	4	4	8	0.0556047	1.25397	0.260059	0.260059	1.25397	0.326503
Long-chain specific acyl-CoA dehydrogenase, mitochondrial	Acadl	P51174	48	29	35	42	29	54	55	64	64	42.6932	35.7672	43.1972	32.5834	53.5334	51.5362	55.4249	51.2314	4	4	8	0.008661	1.37967	0.0975164	0.0975164	1.37967	0.464326
Sodium/potassium-transporting ATPase subunit alpha-1	Atp1a1	Q8VDN2	113	20	36	47	31	48	53	61	68	29.4436	36.7891	48.3398	34.8305	47.5852	49.6621	52.8269	54.4334	4	4	8	0.0162262	1.35504	0.136579	0.136579	1.35504	0.438332
Alpha-actinin-2	Actn2	Q9JI91	104	38	55	40	38	66	41	35	64	55.9429	56.2056	41.1402	42.6955	65.4297	38.4179	30.3105	51.2314	4	4	8	0.565847	-1.078	0.724793	0.724793	0.927646	-0.108354
Cytochrome b-c1 complex subunit 1, mitochondrial	Uqcrc1	Q9CZ13	53	29	38	47	36	47	53	61	62	42.6932	38.833	48.3398	40.4484	46.5939	49.6621	52.8269	49.6304	4	4	8	0.135135	1.17042	0.382182	0.382182	1.17042	0.227029
Elongation factor 1-alpha 1	Eef1a1	P10126	50	15	16	0	8	5	0	0	17	22.0827	16.3507	0	8.98852	4.95679	0	0	13.6083	3	2	5	0.0422222	-2.99098	0.22785	0.22785	0.334339	-1.58062
ATP synthase subunit d, mitochondrial	Atp5pd	Q9DCX2	19	32	38	45	41	39	51	64	52	47.1098	38.833	46.2827	46.0662	38.663	47.7881	55.4249	41.6255	4	4	8	0.697793	1.04212	0.828629	0.828629	1.04212	0.0595206
14-3-3 protein gamma	Ywhag	P61982	28	20	12	11	12	24	43	35	40	29.4436	12.263	11.3136	13.4828	23.7926	40.2919	30.3105	32.0196	4	4	8	0.0478237	1.96561	0.246433	0.246433	1.96561	0.974979
NADH dehydrogenase [ubiquinone] 1 alpha subcomplex subunit 10, mitochondrial	Ndufa10	Q99LC3	41	26	30	39	34	34	36	46	40	38.2767	30.6576	40.1117	38.2012	33.7062	33.7328	39.8366	32.0196	4	4	8	0.663543	-1.05329	0.809025	0.809025	0.949407	-0.0749021
Cytochrome c1, heme protein, mitochondrial	Cyc1	Q9D0M3	35	29	31	28	32	33	48	58	69	42.6932	31.6795	28.7982	35.9541	32.7148	44.977	50.2288	55.2339	4	4	8	0.107665	1.33935	0.345988	0.345988	1.33935	0.421528
NADH dehydrogenase [ubiquinone] iron-sulfur protein 5	Ndufs5	Q99LY9	13	48	49	47	42	41	34	38	42	70.6647	50.0741	48.3398	47.1897	40.6457	31.8587	32.9085	33.6206	4	4	8	0.00256809	-1.54301	0.0486451	0.0486451	0.648086	-0.625743
Sarcalumenin	Srl	Q7TQ48	54	19	27	33	29	39	46	60	50	27.9714	27.5919	33.9407	32.5834	38.663	43.103	51.9608	40.0245	4	4	8	0.00942464	1.4264	0.101073	0.101073	1.4264	0.512374
Calcium-binding mitochondrial carrier protein Aralar1	Slc25a12	Q8BH59	75	13	35	44	32	43	48	60	50	19.1383	35.7672	45.2542	35.9541	42.6284	44.977	51.9608	40.0245	4	4	8	0.0453655	1.289	0.236419	0.236419	1.289	0.366252
Heat shock protein HSP 90-beta	Hsp90ab1	P11499	83	17	31	34	21	31	42	53	80	25.0271	31.6795	34.9692	23.5949	30.7321	39.3549	45.8987	64.0392	4	4	8	0.048909	1.5438	0.247314	0.247314	1.5438	0.626485
LIM domain-binding protein 3	Ldb3	Q9JKS4	76	17	38	42	32	48	42	56	57	25.0271	38.833	43.1972	35.9541	47.5852	39.3549	48.4968	45.628	4	4	8	0.0719859	1.23992	0.305352	0.305352	1.23992	0.310248
Hemoglobin subunit beta-1	Hbb-b1	P02088	16	21	28	40	30	35	46	56	60	30.9158	28.6138	41.1402	33.707	34.6976	43.103	48.4968	48.0294	4	4	8	0.0288479	1.30554	0.183981	0.183981	1.30554	0.384645
Ubiquitin-40S ribosomal protein S27a	Rps27a	P62983	18	21	18	24	15	29	17	25	20	30.9158	18.3946	24.6841	16.8535	28.7494	15.9294	21.6504	16.0098	4	4	8	0.517128	-1.1055	0.6841	0.6841	0.904565	-0.144704
Fructose-bisphosphate aldolase A	Aldoa	P05064	39	26	29	27	22	31	41	50	58	38.2767	29.6357	27.7696	24.7184	30.7321	38.4179	43.3007	46.4285	4	4	8	0.104836	1.34667	0.345163	0.345163	1.34667	0.429397
Tropomyosin alpha-1 chain	Tpm1	P58771	33	47	49	19	33	41	28	18	46	69.1925	50.0741	19.5416	37.0777	40.6457	26.2366	15.5883	36.8226	4	4	8	0.0429422	-1.44591	0.229025	0.229025	0.691608	-0.531974
Dihydrolipoyllysine-residue acetyltransferase component of pyruvate dehydrogenase complex, mitochondrial	Dlat	Q8BMF4	68	24	26	38	33	41	43	49	38	35.3323	26.5699	39.0832	37.0777	40.6457	40.2919	42.4347	30.4186	4	4	8	0.376637	1.11065	0.614478	0.614478	1.11065	0.151404
60 kDa heat shock protein, mitochondrial	Hspd1	P63038	61	13	33	33	21	43	45	52	59	19.1383	33.7234	33.9407	23.5949	42.6284	42.166	45.0327	47.2289	4	4	8	0.0103668	1.57505	0.104326	0.104326	1.57505	0.655394
Alpha-enolase	Eno1	P17182	47	21	17	21	20	26	22	30	42	30.9158	17.3727	21.5986	22.4713	25.7753	20.6145	25.9804	33.6206	4	4	8	0.26984	1.17277	0.52387	0.52387	1.17277	0.229925
NADH dehydrogenase [ubiquinone] 1 alpha subcomplex subunit 12	Ndufa12	Q7TMF3	17	22	28	34	29	34	47	48	49	32.388	28.6138	34.9692	32.5834	33.7062	44.04	41.5687	39.224	4	4	8	0.0712128	1.24389	0.305352	0.305352	1.24389	0.314863
Alpha-crystallin B chain	Cryab	P23927	20	28	30	25	31	33	36	39	41	41.2211	30.6576	25.7126	34.8305	32.7148	33.7328	33.7745	32.8201	4	4	8	0.868709	1.02081	0.939813	0.939813	1.02081	0.0297211
Fibronectin	Fn1	P11276	273	17	60	25	38	55	25	18	39	25.0271	61.3152	25.7126	42.6955	54.5247	23.4255	15.5883	31.2191	4	4	8	0.453382	-1.26275	0.63711	0.63711	0.791924	-0.336567
Unconventional myosin-XVIIIa	Myo18a	Q9JMH9	233	17	47	14	40	43	22	20	48	25.0271	48.0303	14.3991	44.9426	42.6284	20.6145	17.3203	38.4235	4	4	8	0.727708	-1.09154	0.849775	0.849775	0.916134	-0.126369
Heat shock 70 kDa protein 1B	Hspa1b	P17879	70	16	20	25	20	16	17	20	27	23.5549	20.4384	25.7126	22.4713	15.8617	15.9294	17.3203	21.6132	4	4	8	0.10265	-1.29439	0.341667	0.341667	0.772567	-0.372269
Electron transfer flavoprotein subunit alpha, mitochondrial	Etfa	Q99LC5	35	20	24	35	25	40	38	43	45	29.4436	24.5261	35.9977	28.0891	39.6544	35.6068	37.2386	36.0221	4	4	8	0.0717713	1.25096	0.305352	0.305352	1.25096	0.323031
Pyruvate dehydrogenase E1 component subunit beta, mitochondrial	Pdhb	Q9D051	39	26	29	27	37	31	31	44	43	38.2767	29.6357	27.7696	41.5719	30.7321	29.0477	38.1046	34.4211	4	4	8	0.841351	-1.02498	0.92336	0.92336	0.975633	-0.0355895
Electron transfer flavoprotein subunit beta	Etfb	Q9DCW4	28	25	27	29	32	27	41	47	36	36.8045	27.5919	29.8267	35.9541	26.7667	38.4179	40.7027	28.8177	4	4	8	0.753405	1.04766	0.867557	0.867557	1.04766	0.0671686
Myosin-14	Myh14	Q6URW6	229	2	24	17	0	21	20	0	23	2.94436	24.5261	17.4846	0	20.8185	18.7404	0	18.4113	3	3	6	0.504096	1.40536	0.673289	0.673289	1.40536	0.490941
Leucine-rich PPR motif-containing protein, mitochondrial	Lrpprc	Q6PB66	157	13	33	26	31	29	34	46	40	19.1383	33.7234	26.7411	34.8305	28.7494	31.8587	39.8366	32.0196	4	4	8	0.286168	1.14674	0.52387	0.52387	1.14674	0.197535
Dihydrolipoyllysine-residue succinyltransferase component of 2-oxoglutarate dehydrogenase complex, mitochondrial	Dlst	Q9D2G2	49	15	20	21	22	33	34	47	48	22.0827	20.4384	21.5986	24.7184	32.7148	31.8587	40.7027	38.4235	4	4	8	0.0041074	1.62768	0.0634906	0.0634906	1.62768	0.70282
Annexin A2	Anxa2	P07356	39	44	32	32	32	40	24	20	12	64.7759	32.7015	32.9122	35.9541	39.6544	22.4885	17.3203	9.60589	4	4	8	0.00911037	-1.91907	0.100277	0.100277	0.521085	-0.940411
Isocitrate dehydrogenase [NAD] subunit alpha, mitochondrial	Idh3a	Q9D6R2	40	17	21	23	22	25	28	36	42	25.0271	21.4603	23.6556	24.7184	24.784	26.2366	31.1765	33.6206	4	4	8	0.129366	1.23574	0.377967	0.377967	1.23574	0.305375
PDZ and LIM domain protein 5	Pdlim5	Q8CI51	63	22	29	30	31	24	32	38	35	32.388	29.6357	30.8552	34.8305	23.7926	29.9847	32.9085	28.0172	4	4	8	0.454261	-1.10182	0.637193	0.637193	0.907586	-0.139894
NADH dehydrogenase [ubiquinone] 1 alpha subcomplex subunit 9, mitochondrial	Ndufa9	Q9DC69	43	23	22	28	31	36	32	37	42	33.8602	22.4823	28.7982	34.8305	35.6889	29.9847	32.0425	33.6206	4	4	8	0.470021	1.09694	0.646545	0.646545	1.09694	0.133478
Ig heavy chain V region AC38 205.12	NA	P06330	13	13	48	33	20	10	46	32	31	19.1383	49.0522	33.9407	22.4713	9.91359	43.103	27.7124	24.8152	4	4	8	0.244168	-1.1654	0.500408	0.500408	0.858072	-0.22083
Alpha-actinin-4	Actn4	P57780	105	5	16	14	8	25	49	49	64	7.3609	16.3507	14.3991	8.98852	24.784	45.9141	42.4347	51.2314	4	4	8	0.000385502	3.47281	0.0123518	0.0123518	3.47281	1.7961
Cysteine-rich protein 2	Crip2	Q9DCT8	23	16	19	21	23	17	15	18	19	23.5549	19.4165	21.5986	25.842	16.8531	14.0553	15.5883	15.2093	4	4	8	0.0239612	-1.4703	0.170296	0.170296	0.680133	-0.556112
40S ribosomal protein S18	Rps18	P62270	18	23	27	21	21	29	30	27	31	33.8602	27.5919	21.5986	23.5949	28.7494	28.1106	23.3824	24.8152	4	4	8	0.973976	-1.00457	0.989847	0.989847	0.995455	-0.00657226
Calcium-binding mitochondrial carrier protein Aralar2	Slc25a13	Q9QXX4	74	6	25	20	21	30	28	39	29	8.83308	25.548	20.5701	23.5949	29.7408	26.2366	33.7745	23.2142	4	4	8	0.120324	1.42614	0.367009	0.367009	1.42614	0.512118
NADH dehydrogenase [ubiquinone] 1 alpha subcomplex subunit 7	Ndufa7	Q9Z1P6	13	22	25	29	24	30	38	38	29	32.388	25.548	29.8267	26.9656	29.7408	35.6068	32.9085	23.2142	4	4	8	0.62242	1.06716	0.771259	0.771259	1.06716	0.0937743
NADH dehydrogenase [ubiquinone] flavoprotein 1, mitochondrial	Ndufv1	Q91YT0	51	20	15	24	26	25	37	34	33	29.4436	15.3288	24.6841	29.2127	24.784	34.6698	29.4445	26.4162	4	4	8	0.366928	1.19038	0.605133	0.605133	1.19038	0.25142
Hexokinase-2	Hk2	O08528	103	16	23	31	19	33	29	36	34	23.5549	23.5042	31.8837	21.3477	32.7148	27.1736	31.1765	27.2167	4	4	8	0.260044	1.16658	0.514986	0.514986	1.16658	0.222283
Tubulin beta-4B chain	Tubb4b	P68372	50	27	14	11	16	32	35	31	57	39.7489	14.3069	11.3136	17.977	31.7235	32.7958	26.8464	45.628	4	4	8	0.0592033	1.75705	0.271228	0.271228	1.75705	0.813155
Tubulin alpha-1B chain	Tuba1b	P05213	50	34	13	16	9	25	26	32	46	50.0541	13.285	16.4561	10.1121	24.784	24.3626	27.7124	36.8226	4	4	8	0.294987	1.45028	0.525445	0.525445	1.45028	0.53633
14-3-3 protein epsilon	Ywhae	P62259	29	9	4	7	6	15	30	33	42	13.2496	4.08768	7.19954	6.74139	14.8704	28.1106	28.5785	33.6206	4	4	8	0.00797215	3.34631	0.0908825	0.0908825	3.34631	1.74257
Myosin light chain 3	Myl3	P09542	22	23	31	13	28	30	29	11	26	33.8602	31.6795	13.3706	31.4598	29.7408	27.1736	9.52615	20.8128	4	4	8	0.0930453	-1.2763	0.3273	0.3273	0.783517	-0.351963
Mitochondrial 2-oxoglutarate/malate carrier protein	Slc25a11	Q9CR62	34	10	11	20	10	20	44	40	30	14.7218	11.2411	20.5701	11.2357	19.8272	41.2289	34.6406	24.0147	4	4	8	0.0110115	2.09986	0.105711	0.105711	2.09986	1.0703
Protein SGT1 homolog	Sugt1	Q9CX34	38	0	0	0	0	41	52	52	57	0	0	0	0	40.6457	48.7251	45.0327	45.628	0	4	4	5.62e-13	10000	5.13e-10	5.13e-10	10000	13.2877
Cytochrome b-c1 complex subunit 8	Uqcrq	Q9CQ69	10	20	21	23	22	26	30	29	26	29.4436	21.4603	23.6556	24.7184	25.7753	28.1106	25.1144	20.8128	4	4	8	0.926006	1.01346	0.968483	0.968483	1.01346	0.0192822
Enoyl-CoA delta isomerase 1, mitochondrial	Eci1	P42125	32	20	29	23	26	24	23	33	32	29.4436	29.6357	23.6556	29.2127	23.7926	21.5515	28.5785	25.6157	4	4	8	0.428877	-1.11606	0.63099	0.63099	0.896011	-0.158412
Titin	Ttn	A2ASS6	3906	7	15	7	11	25	8	9	12	10.3053	15.3288	7.19954	12.3592	24.784	7.49617	7.79413	9.60589	4	4	8	0.971556	1.01056	0.989847	0.989847	1.01056	0.0151503
Complement C3	C3	P01027	186	5	14	29	18	15	4	12	20	7.3609	14.3069	29.8267	20.2242	14.8704	3.74809	10.3922	16.0098	4	4	8	0.237586	-1.5687	0.494765	0.494765	0.637469	-0.649574
Cytochrome c oxidase subunit NDUFA4	Ndufa4	Q62425	9	20	18	21	16	24	32	31	26	29.4436	18.3946	21.5986	17.977	23.7926	29.9847	26.8464	20.8128	4	4	8	0.247404	1.18832	0.503385	0.503385	1.18832	0.248918
Dihydrolipoyl dehydrogenase, mitochondrial	Dld	O08749	54	13	18	25	16	29	30	42	34	19.1383	18.3946	25.7126	17.977	28.7494	28.1106	36.3726	27.2167	4	4	8	0.0109366	1.48124	0.105711	0.105711	1.48124	0.566808
Creatine kinase M-type	Ckm	P07310	43	13	19	19	15	21	24	24	22	19.1383	19.4165	19.5416	16.8535	20.8185	22.4885	20.7843	17.6108	4	4	8	0.594559	1.08985	0.748275	0.748275	1.08985	0.124126
14-3-3 protein eta	Ywhah	P68510	28	0	0	0	0	0	15	0	16	0	0	0	0	0	14.0553	0	12.8078	0	2	2	0.00103799	10000	0.0262958	0.0262958	10000	13.2877
Triosephosphate isomerase	Tpi1	P17751	27	26	22	33	22	26	23	25	26	38.2767	22.4823	33.9407	24.7184	25.7753	21.5515	21.6504	20.8128	4	4	8	0.0551621	-1.32245	0.259319	0.259319	0.756171	-0.403216
Cytochrome c oxidase subunit 4 isoform 1, mitochondrial	Cox4i1	P19783	20	16	25	23	14	23	34	32	31	23.5549	25.548	23.6556	15.7299	22.8013	31.8587	27.7124	24.8152	4	4	8	0.159179	1.22612	0.420786	0.420786	1.22612	0.294102
Cullin-1	Cul1	Q9WTX6	90	13	32	41	24	16	20	28	20	19.1383	32.7015	42.1687	26.9656	15.8617	18.7404	24.2484	16.0098	4	4	8	0.00692081	-1.63382	0.0809202	0.0809202	0.612063	-0.708247
Tubulin alpha-4A chain	Tuba4a	P68368	50	28	0	0	10	0	13	0	12	41.2211	0	0	11.2357	0	12.1813	0	9.60589	2	2	4	0.380169	-1.65854	0.618242	0.618242	0.602939	-0.729917
Malate dehydrogenase, mitochondrial	Mdh2	P08249	36	13	18	25	26	33	26	30	35	19.1383	18.3946	25.7126	29.2127	32.7148	24.3626	25.9804	28.0172	4	4	8	0.25393	1.17573	0.507438	0.507438	1.17573	0.233553
Methylcrotonoyl-CoA carboxylase subunit alpha, mitochondrial	Mccc1	Q99MR8	79	3	19	17	16	27	27	34	32	4.41654	19.4165	17.4846	17.977	26.7667	25.2996	29.4445	25.6157	4	4	8	0.0341326	1.77371	0.203395	0.203395	1.77371	0.826769
Caveolae-associated protein 1	Cavin1	O54724	44	19	23	21	18	25	14	34	29	27.9714	23.5042	21.5986	20.2242	24.784	13.1183	29.4445	23.2142	4	4	8	0.878756	-1.02456	0.944284	0.944284	0.976032	-0.0349997
14-3-3 protein sigma	Sfn	O70456	28	17	6	0	11	0	0	0	0	25.0271	6.13152	0	12.3592	0	0	0	0	3	0	3	4.3e-06	-10000	0.000490395	0.000490395	0.0001	-13.2877
Tubulin beta-5 chain	Tubb5	P99024	50	10	0	9	10	0	19	0	21	14.7218	0	9.25655	11.2357	0	17.8034	0	16.8103	3	2	5	0.394643	-1.61207	0.618242	0.618242	0.620322	-0.688911
Protein NipSnap homolog 2	Nipsnap2	O55126	33	15	16	23	23	27	20	24	25	22.0827	16.3507	23.6556	25.842	26.7667	18.7404	20.7843	20.0123	4	4	8	0.82705	-1.03408	0.914266	0.914266	0.967045	-0.0483449
Desmin	Des	P31001	53	16	18	8	11	27	14	10	15	23.5549	18.3946	8.22804	12.3592	26.7667	13.1183	8.66014	12.0074	4	4	8	0.803421	-1.04713	0.897942	0.897942	0.954991	-0.0664415
NADH dehydrogenase [ubiquinone] iron-sulfur protein 2, mitochondrial	Ndufs2	Q91WD5	53	12	12	20	16	24	29	34	35	17.6662	12.263	20.5701	17.977	23.7926	27.1736	29.4445	28.0172	4	4	8	0.0104097	1.59728	0.104326	0.104326	1.59728	0.675621
Hydroxyacyl-coenzyme A dehydrogenase, mitochondrial	Hadh	Q61425	34	16	19	22	21	28	24	28	27	23.5549	19.4165	22.6271	23.5949	27.7581	22.4885	24.2484	21.6132	4	4	8	0.644922	1.07104	0.790803	0.790803	1.07104	0.099007
ATP synthase subunit e, mitochondrial	Atp5me	Q06185	8	16	19	26	20	20	29	19	24	23.5549	19.4165	26.7411	22.4713	19.8272	27.1736	16.4543	19.2118	4	4	8	0.494209	-1.11611	0.666743	0.666743	0.895972	-0.158475
Calsequestrin-2	Casq2	O09161	48	9	13	13	17	24	23	28	30	13.2496	13.285	13.3706	19.1006	23.7926	21.5515	24.2484	24.0147	4	4	8	0.0128282	1.57735	0.118175	0.118175	1.57735	0.657506
Basement membrane-specific heparan sulfate proteoglycan core protein	Hspg2	Q05793	398	12	29	18	23	36	15	17	19	17.6662	29.6357	18.5131	25.842	35.6889	14.0553	14.7222	15.2093	4	4	8	0.485484	-1.21202	0.661826	0.661826	0.82507	-0.277412
NADH dehydrogenase [ubiquinone] 1 alpha subcomplex subunit 8	Ndufa8	Q9DCJ5	20	13	25	23	15	16	25	22	28	19.1383	25.548	23.6556	16.8535	15.8617	23.4255	19.0523	22.4137	4	4	8	0.760725	-1.04859	0.874882	0.874882	0.953659	-0.0684544
40S ribosomal protein S19	Rps19	Q9CZX8	16	17	22	22	24	22	19	26	18	25.0271	22.4823	22.6271	26.9656	21.8099	17.8034	22.5164	14.4088	4	4	8	0.11808	-1.27628	0.361372	0.361372	0.783527	-0.351944
Sodium/potassium-transporting ATPase subunit alpha-2	Atp1a2	Q6PIE5	112	0	0	15	0	0	14	16	17	0	0	15.4276	0	0	13.1183	13.8562	13.6083	1	3	4	0.00647225	4	0.0781801	0.0781801	4	2
Tubulin beta-2A chain	Tubb2a	Q7TMM9	50	10	0	0	0	0	0	0	0	14.7218	0	0	0	0	0	0	0	1	0	1	0.0514193	-10000	0.253483	0.253483	0.0001	-13.2877
Ig kappa chain V-V region HP R16.7	NA	P01644	12	9	22	18	21	12	22	18	21	13.2496	22.4823	18.5131	23.5949	11.8963	20.6145	15.5883	16.8103	4	4	8	0.269089	-1.2038	0.52387	0.52387	0.830703	-0.267595
Protein 4.1	Epb41	P48193	96	14	30	13	18	35	13	8	30	20.6105	30.6576	13.3706	20.2242	34.6976	12.1813	6.92811	24.0147	4	4	8	0.541853	-1.19321	0.703976	0.703976	0.838077	-0.254846
Heat shock 70 kDa protein 4	Hspa4	Q61316	94	13	24	26	22	17	13	23	21	19.1383	24.5261	26.7411	24.7184	16.8531	12.1813	19.9183	16.8103	4	4	8	0.0278441	-1.46015	0.181384	0.181384	0.684862	-0.546115
L-lactate dehydrogenase B chain	Ldhb	P16125	37	12	11	20	14	19	17	21	25	17.6662	11.2411	20.5701	15.7299	18.8358	15.9294	18.1863	20.0123	4	4	8	0.510187	1.1201	0.677279	0.677279	1.1201	0.163623
Heat shock protein HSP 90-alpha	Hsp90aa1	P07901	85	2	11	11	8	0	12	14	37	2.94436	11.2411	11.3136	8.98852	0	11.2443	12.1242	29.6182	4	3	7	0.509457	1.321	0.677279	0.677279	1.321	0.401631
Elongation factor 2	Eef2	P58252	95	18	22	22	7	16	17	21	33	26.4992	22.4823	22.6271	7.86496	15.8617	15.9294	18.1863	26.4162	4	4	8	0.966365	1.01298	0.988032	0.988032	1.01298	0.0186106
Filamin-C	Flnc	Q8VHX6	291	12	16	18	21	33	27	16	13	17.6662	16.3507	18.5131	23.5949	32.7148	25.2996	13.8562	10.4064	4	4	8	0.992191	1.00268	0.998714	0.998714	1.00268	0.00386245
Isocitrate dehydrogenase [NAD] subunit gamma 1, mitochondrial	Idh3g	P70404	43	12	13	21	14	22	22	29	27	17.6662	13.285	21.5986	15.7299	21.8099	20.6145	25.1144	21.6132	4	4	8	0.0968305	1.30864	0.331461	0.331461	1.30864	0.388068
Myosin regulatory light chain 2, ventricular/cardiac muscle isoform	Myl2	P51667	19	19	20	18	17	20	26	20	19	27.9714	20.4384	18.5131	19.1006	19.8272	24.3626	17.3203	15.2093	4	4	8	0.52751	-1.10605	0.692215	0.692215	0.904114	-0.145423
F-box/WD repeat-containing protein 5	Fbxw5	Q9QXW2	65	6	28	22	22	16	15	19	17	8.83308	28.6138	22.6271	24.7184	15.8617	14.0553	16.4543	13.6083	4	4	8	0.166555	-1.4352	0.436488	0.436488	0.696769	-0.521248
Protein-glutamine gamma-glutamyltransferase K	Tgm1	Q9JLF6	90	21	25	27	17	19	21	6	5	30.9158	25.548	27.7696	19.1006	18.8358	19.6775	5.19608	4.00245	4	4	8	0.0240879	-2.3976	0.170296	0.170296	0.417084	-1.26159
Y-box-binding protein 1	Ybx1	P62960	36	13	11	28	18	17	19	27	25	19.1383	11.2411	28.7982	20.2242	16.8531	17.8034	23.3824	20.0123	4	4	8	0.930168	-1.01416	0.97061	0.97061	0.986035	-0.0202888
Desmoglein-1-beta	Dsg1b	Q7TSF1	114	21	9	23	24	29	20	6	4	30.9158	9.19729	23.6556	26.9656	28.7494	18.7404	5.19608	3.20196	4	4	8	0.178583	-1.79663	0.454422	0.454422	0.556596	-0.845297
Protein-glutamine gamma-glutamyltransferase 2	Tgm2	P21981	77	6	20	14	16	25	20	16	22	8.83308	20.4384	14.3991	17.977	24.784	18.7404	13.8562	17.6108	4	4	8	0.410315	1.17388	0.622641	0.622641	1.17388	0.231287
Cytochrome c oxidase subunit 6C	Cox6c	Q9CPQ1	8	12	17	20	16	22	24	24	21	17.6662	17.3727	20.5701	17.977	21.8099	22.4885	20.7843	16.8103	4	4	8	0.538434	1.105	0.701503	0.701503	1.105	0.144041
40S ribosomal protein S4, X isoform	Rps4x	P62702	30	15	16	19	14	18	16	15	22	22.0827	16.3507	19.5416	15.7299	17.8445	14.9923	12.9902	17.6108	4	4	8	0.396239	-1.15808	0.618242	0.618242	0.863498	-0.211735
NADH dehydrogenase [ubiquinone] 1 alpha subcomplex subunit 6	Ndufa6	Q9CQZ5	15	12	15	13	13	21	25	27	23	17.6662	15.3288	13.3706	14.6064	20.8185	23.4255	23.3824	18.4113	4	4	8	0.0392706	1.42949	0.219722	0.219722	1.42949	0.515498
Fibrillin-1	Fbn1	Q61554	312	11	37	5	23	32	12	0	29	16.194	37.8111	5.14253	25.842	31.7235	11.2443	0	23.2142	4	3	7	0.269599	-1.67012	0.52387	0.52387	0.59876	-0.739951
Apoptosis-inducing factor 1, mitochondrial	Aifm1	Q9Z0X1	67	6	16	22	16	19	24	22	23	8.83308	16.3507	22.6271	17.977	18.8358	22.4885	19.0523	18.4113	4	4	8	0.357472	1.16611	0.595814	0.595814	1.16611	0.2217
NADH dehydrogenase [ubiquinone] iron-sulfur protein 7, mitochondrial	Ndufs7	Q9DC70	25	11	14	14	17	16	13	18	16	16.194	14.3069	14.3991	19.1006	15.8617	12.1813	15.5883	12.8078	4	4	8	0.475704	-1.14048	0.651415	0.651415	0.876821	-0.189646
Mitochondrial carnitine/acylcarnitine carrier protein	Slc25a20	Q9Z2Z6	33	14	14	15	17	18	15	23	18	20.6105	14.3069	15.4276	19.1006	17.8445	14.0553	19.9183	14.4088	4	4	8	0.818154	-1.04086	0.909947	0.909947	0.960744	-0.0577758
Ig kappa chain V19-17	Igk-V19-17	P01633	16	9	10	9	14	7	12	10	14	13.2496	10.2192	9.25655	15.7299	6.93951	11.2443	8.66014	11.2069	4	4	8	0.304745	-1.25033	0.535086	0.535086	0.799792	-0.322304
Pyruvate kinase PKM	Pkm	P52480	58	17	10	8	6	7	8	11	28	25.0271	10.2192	8.22804	6.74139	6.93951	7.49617	9.52615	22.4137	4	4	8	0.911911	-1.04569	0.96146	0.96146	0.95631	-0.0644503
Myomesin-1	Myom1	Q62234	185	3	11	13	15	19	17	25	34	4.41654	11.2411	13.3706	16.8535	18.8358	15.9294	21.6504	27.2167	4	4	8	0.0109567	1.7658	0.105711	0.105711	1.7658	0.820321
Keratin, type II cuticular Hb2	Krt82	Q99M74	57	21	13	11	14	16	15	3	8	30.9158	13.285	11.3136	15.7299	15.8617	14.0553	2.59804	6.40392	4	4	8	0.0368236	-1.85784	0.209894	0.209894	0.538258	-0.893629
Myosin light polypeptide 6	Myl6	Q60605	17	20	23	9	12	17	14	9	28	29.4436	23.5042	9.25655	13.4828	16.8531	13.1183	7.79413	22.4137	4	4	8	0.417574	-1.21957	0.628865	0.628865	0.819959	-0.286376
Serine/arginine repetitive matrix protein 2	Srrm2	Q8BTI8	295	0	0	5	0	0	0	0	0	0	0	5.14253	0	0	0	0	0	1	0	1	0.167226	-10000	0.436779	0.436779	0.0001	-13.2877
Hexokinase-1	Hk1	P17710	108	14	9	19	11	16	13	22	21	20.6105	9.19729	19.5416	12.3592	15.8617	12.1813	19.0523	16.8103	4	4	8	0.76533	1.05554	0.876709	0.876709	1.05554	0.0779745
Histone H4	H4c1	P62806	11	31	11	13	12	12	20	8	20	45.6376	11.2411	13.3706	13.4828	11.8963	18.7404	6.92811	16.0098	4	4	8	0.39811	-1.35528	0.618242	0.618242	0.737856	-0.438589
Alpha-actinin-1	Actn1	Q7TPR4	103	0	0	0	0	0	0	21	23	0	0	0	0	0	0	18.1863	18.4113	0	2	2	0.000368171	10000	0.0123518	0.0123518	10000	13.2877
Kinesin-like protein KIF27	Kif27	Q7M6Z4	159	12	9	7	11	14	4	4	0	17.6662	9.19729	7.19954	12.3592	13.879	3.74809	3.46406	0	4	3	7	0.0356893	-2.82246	0.208645	0.208645	0.354301	-1.49695
NADH dehydrogenase [ubiquinone] 1 alpha subcomplex subunit 13	Ndufa13	Q9ERS2	17	12	11	9	11	16	23	21	15	17.6662	11.2411	9.25655	12.3592	15.8617	21.5515	18.1863	12.0074	4	4	8	0.137981	1.37877	0.386008	0.386008	1.37877	0.463386
Tripartite motif-containing protein 72	Trim72	Q1XH17	53	17	11	11	11	20	13	20	19	25.0271	11.2411	11.3136	12.3592	19.8272	12.1813	17.3203	15.2093	4	4	8	0.57952	1.10728	0.736103	0.736103	1.10728	0.147022
Tropomyosin alpha-3 chain	Tpm3	P21107	33	8	0	0	0	0	0	0	7	11.7774	0	0	0	0	0	0	5.60343	1	1	2	0.610395	-1.45837	0.761533	0.761533	0.685695	-0.544361
Propionyl-CoA carboxylase alpha chain, mitochondrial	Pcca	Q91ZA3	80	0	9	16	14	17	18	25	21	0	9.19729	16.4561	15.7299	16.8531	16.8664	21.6504	16.8103	3	4	7	0.105313	2.0479	0.345385	0.345385	2.0479	1.03415
40S ribosomal protein S3a	Rps3a	P97351	30	17	20	17	15	20	12	16	12	25.0271	20.4384	17.4846	16.8535	19.8272	11.2443	13.8562	9.60589	4	4	8	0.0317476	-1.47729	0.196965	0.196965	0.676915	-0.562953
Collagen alpha-1(VI) chain	Col6a1	Q04857	108	12	21	11	16	28	11	7	17	17.6662	21.4603	11.3136	17.977	27.7581	10.3072	6.0621	13.6083	4	4	8	0.322408	-1.27721	0.559004	0.559004	0.782955	-0.352999
Aspartate aminotransferase, mitochondrial	Got2	P05202	47	11	18	18	14	16	16	21	20	16.194	18.3946	18.5131	15.7299	15.8617	14.9923	18.1863	16.0098	4	4	8	0.741002	-1.05918	0.858696	0.858696	0.944123	-0.0829526
Acetyl-coenzyme A synthetase 2-like, mitochondrial	Acss1	Q99NB1	75	4	13	18	14	18	19	24	23	5.88872	13.285	18.5131	15.7299	17.8445	17.8034	20.7843	18.4113	4	4	8	0.0856494	1.35789	0.325179	0.325179	1.35789	0.441369
Junctophilin-2	Jph2	Q9ET78	75	9	16	20	14	15	14	16	21	13.2496	16.3507	20.5701	15.7299	14.8704	13.1183	13.8562	16.8103	4	4	8	0.474172	-1.13731	0.650292	0.650292	0.879267	-0.185627
NADH dehydrogenase [ubiquinone] 1 alpha subcomplex subunit 2	Ndufa2	Q9CQ75	11	8	12	14	10	9	16	18	12	11.7774	12.263	14.3991	11.2357	8.92223	14.9923	15.5883	9.60589	4	4	8	0.997619	1.0006	0.998714	0.998714	1.0006	0.000872161
L-lactate dehydrogenase A chain	Ldha	P06151	36	11	11	5	8	10	9	13	9	16.194	11.2411	5.14253	8.98852	9.91359	8.43319	11.2582	7.20442	4	4	8	0.704909	-1.09391	0.834905	0.834905	0.914151	-0.129495
SRA stem-loop-interacting RNA-binding protein, mitochondrial	Slirp	Q9D8T7	13	13	14	15	10	13	15	14	15	19.1383	14.3069	15.4276	11.2357	12.8877	14.0553	12.1242	12.0074	4	4	8	0.439613	-1.16037	0.63099	0.63099	0.861794	-0.214585
Ig gamma-2A chain C region, membrane-bound form	Igh-1a	P01865	44	0	0	0	0	0	7	10	6	0	0	0	0	0	6.55915	8.66014	4.80294	0	3	3	0.000237691	10000	0.00942497	0.00942497	10000	13.2877
60S ribosomal protein L30	Rpl30	P62889	13	9	9	15	8	13	15	16	15	13.2496	9.19729	15.4276	8.98852	12.8877	14.0553	13.8562	12.0074	4	4	8	0.534147	1.13451	0.697912	0.697912	1.13451	0.182064
MICOS complex subunit Mic19	Chchd3	Q9CRB9	26	14	13	16	14	18	11	14	12	20.6105	13.285	16.4561	15.7299	17.8445	10.3072	12.1242	9.60589	4	4	8	0.123185	-1.33938	0.368231	0.368231	0.746616	-0.421561
Peroxiredoxin-1	Prdx1	P35700	22	15	11	16	10	17	15	12	15	22.0827	11.2411	16.4561	11.2357	16.8531	14.0553	10.3922	12.0074	4	4	8	0.504966	-1.13574	0.673289	0.673289	0.880487	-0.183627
Cytochrome c oxidase subunit 5B, mitochondrial	Cox5b	P19536	14	6	7	16	14	12	19	23	25	8.83308	7.15344	16.4561	15.7299	11.8963	17.8034	19.9183	20.0123	4	4	8	0.0545509	1.44776	0.257774	0.257774	1.44776	0.533825
Peroxiredoxin-6	Prdx6	O08709	25	15	8	20	15	24	10	16	11	22.0827	8.17537	20.5701	16.8535	23.7926	9.37021	13.8562	8.8054	4	4	8	0.237044	-1.24388	0.494765	0.494765	0.803937	-0.314846
Mitochondrial pyruvate carrier 2	Mpc2	Q9D023	14	10	10	17	10	15	16	24	22	14.7218	10.2192	17.4846	11.2357	14.8704	14.9923	20.7843	17.6108	4	4	8	0.168483	1.28798	0.436779	0.436779	1.28798	0.36511
Lon protease homolog, mitochondrial	Lonp1	Q8CGK3	106	9	13	11	10	11	15	18	18	13.2496	13.285	11.3136	11.2357	10.9049	14.0553	15.5883	14.4088	4	4	8	0.508719	1.13987	0.677279	0.677279	1.13987	0.188874
Transitional endoplasmic reticulum ATPase	Vcp	Q01853	89	3	14	18	5	13	14	19	27	4.41654	14.3069	18.5131	5.61783	12.8877	13.1183	16.4543	21.6132	4	4	8	0.182852	1.55991	0.463226	0.463226	1.55991	0.641458
NADH dehydrogenase [ubiquinone] 1 alpha subcomplex subunit 5	Ndufa5	Q9CPP6	13	7	7	16	5	15	19	17	17	10.3053	7.15344	16.4561	5.61783	14.8704	17.8034	14.7222	13.6083	4	4	8	0.0816042	1.56317	0.319469	0.319469	1.56317	0.644472
ATP-dependent 6-phosphofructokinase, liver type	Pfkl	P12382	85	0	0	0	0	8	7	8	8	0	0	0	0	7.93087	6.55915	6.92811	6.40392	0	4	4	2.94e-06	10000	0.000383193	0.000383193	10000	13.2877
Troponin I, cardiac muscle	Tnni3	P48787	24	10	20	11	12	18	8	8	16	14.7218	20.4384	11.3136	13.4828	17.8445	7.49617	6.92811	12.8078	4	4	8	0.213007	-1.36912	0.494307	0.494307	0.730396	-0.453249
Nucleoside diphosphate kinase B	Nme2	Q01768	17	14	17	12	10	13	16	19	16	20.6105	17.3727	12.3421	11.2357	12.8877	14.9923	16.4543	12.8078	4	4	8	0.799598	-1.04842	0.897134	0.897134	0.953819	-0.0682124
NADH dehydrogenase [ubiquinone] iron-sulfur protein 4, mitochondrial	Ndufs4	Q9CXZ1	20	5	7	12	7	7	8	10	15	7.3609	7.15344	12.3421	7.86496	6.93951	7.49617	8.66014	12.0074	4	4	8	0.959235	1.01232	0.98516	0.98516	1.01232	0.0176709
Citrate synthase, mitochondrial	Cs	Q9CZU6	52	7	8	17	13	18	19	21	18	10.3053	8.17537	17.4846	14.6064	17.8445	17.8034	18.1863	14.4088	4	4	8	0.131791	1.32841	0.377967	0.377967	1.32841	0.409701
Clathrin heavy chain 1	Cltc	Q68FD5	192	0	11	4	11	13	18	18	19	0	11.2411	4.11402	12.3592	12.8877	16.8664	15.5883	15.2093	3	4	7	0.0425231	2.45337	0.228124	0.228124	2.45337	1.29476
Enoyl-CoA hydratase, mitochondrial	Echs1	Q8BH95	31	10	10	11	13	14	10	13	14	14.7218	10.2192	11.3136	14.6064	13.879	9.37021	11.2582	11.2069	4	4	8	0.594845	-1.11606	0.748275	0.748275	0.896007	-0.158417
Heat shock 70 kDa protein 4L	Hspa4l	P48722	94	10	15	28	15	7	11	14	9	14.7218	15.3288	28.7982	16.8535	6.93951	10.3072	12.1242	7.20442	4	4	8	0.00454414	-2.07668	0.0653653	0.0653653	0.481537	-1.05428
Peroxiredoxin-2	Prdx2	Q61171	22	12	10	8	9	12	12	10	10	17.6662	10.2192	8.22804	10.1121	11.8963	11.2443	8.66014	8.00491	4	4	8	0.552493	-1.14012	0.713702	0.713702	0.877099	-0.189188
Ig kappa chain V-III region PC 6684	NA	P01670	12	4	20	11	16	0	12	8	12	5.88872	20.4384	11.3136	17.977	0	11.2443	6.92811	9.60589	4	3	7	0.00912607	-1.96175	0.100277	0.100277	0.509749	-0.97214
Ig heavy chain V-III region J606	NA	P01801	13	3	18	25	10	9	13	18	8	4.41654	18.3946	25.7126	11.2357	8.92223	12.1813	15.5883	6.40392	4	4	8	0.110769	-1.42729	0.349556	0.349556	0.700629	-0.513278
Fatty acid-binding protein, heart	Fabp3	P11404	15	5	11	20	9	10	16	12	6	7.3609	11.2411	20.5701	10.1121	9.91359	14.9923	10.3922	4.80294	4	4	8	0.402652	-1.24885	0.618242	0.618242	0.800736	-0.320601
Superoxide dismutase [Mn], mitochondrial	Sod2	P09671	25	6	11	13	10	15	15	19	15	8.83308	11.2411	13.3706	11.2357	14.8704	14.0553	16.4543	12.0074	4	4	8	0.239245	1.26586	0.494765	0.494765	1.26586	0.340122
40S ribosomal protein S2	Rps2	P25444	31	6	11	14	9	7	14	15	14	8.83308	11.2411	14.3991	10.1121	6.93951	13.1183	12.9902	11.2069	4	4	8	0.99748	1.00067	0.998714	0.998714	1.00067	0.000968107
40S ribosomal protein S11	Rps11	P62281	18	10	14	16	8	12	12	14	18	14.7218	14.3069	16.4561	8.98852	11.8963	11.2443	12.1242	14.4088	4	4	8	0.666751	-1.08868	0.810901	0.810901	0.918543	-0.12258
Pregnancy zone protein	Pzp	Q61838	166	3	0	9	19	11	8	16	24	4.41654	0	9.25655	21.3477	10.9049	7.49617	13.8562	19.2118	3	4	7	0.114187	1.87528	0.353012	0.353012	1.87528	0.907104
Voltage-dependent anion-selective channel protein 2	Vdac2	Q60930	32	4	7	6	7	11	10	11	12	5.88872	7.15344	6.17103	7.86496	10.9049	9.37021	9.52615	9.60589	4	4	8	0.148554	1.43578	0.403219	0.403219	1.43578	0.52183
Plakophilin-1	Pkp1	P97350	81	16	13	8	15	9	15	2	3	23.5549	13.285	8.22804	16.8535	8.92223	14.0553	1.73203	2.40147	4	4	8	0.0370868	-2.49633	0.210082	0.210082	0.400587	-1.31981
Vinculin	Vcl	Q64727	117	7	23	7	6	18	10	3	19	10.3053	23.5042	7.19954	6.74139	17.8445	9.37021	2.59804	15.2093	4	4	8	0.814517	-1.09306	0.908709	0.908709	0.914862	-0.128373
Carnitine O-acetyltransferase	Crat	P47934	71	3	12	16	9	9	9	14	12	4.41654	12.263	16.4561	10.1121	8.92223	8.43319	12.1242	9.60589	4	4	8	0.557059	-1.13732	0.716556	0.716556	0.879258	-0.185642
Ig heavy chain V region 441	NA	P01806	13	6	8	15	11	9	6	16	9	8.83308	8.17537	15.4276	12.3592	8.92223	5.62213	13.8562	7.20442	4	4	8	0.283108	-1.27214	0.52387	0.52387	0.78608	-0.347252
Cytochrome c oxidase subunit 2	Mtco2	P00405	26	6	9	9	7	16	10	19	12	8.83308	9.19729	9.25655	7.86496	15.8617	9.37021	16.4543	9.60589	4	4	8	0.0973209	1.44157	0.331461	0.331461	1.44157	0.527636
Bifunctional glutamate/proline--tRNA ligase	Eprs1	Q8CGC7	170	0	6	4	6	7	10	10	11	0	6.13152	4.11402	6.74139	6.93951	9.37021	8.66014	8.8054	3	4	7	0.0336997	1.89579	0.202987	0.202987	1.89579	0.922803
60S ribosomal protein L26	Rpl26	P61255	17	4	9	12	8	9	14	16	19	5.88872	9.19729	12.3421	8.98852	8.92223	13.1183	13.8562	15.2093	4	4	8	0.12138	1.39641	0.367771	0.367771	1.39641	0.481721
Histone H3.3C	H3-5	P02301	15	11	6	3	6	7	7	8	10	16.194	6.13152	3.08552	6.74139	6.93951	6.55915	6.92811	8.00491	4	4	8	0.897751	-1.03951	0.954178	0.954178	0.961993	-0.0559018
Fatty acid-binding protein, adipocyte	Fabp4	P04117	15	8	9	14	11	10	16	14	12	11.7774	9.19729	14.3991	12.3592	9.91359	14.9923	12.1242	9.60589	4	4	8	0.928738	-1.01877	0.970228	0.970228	0.981577	-0.0268261
NADH dehydrogenase [ubiquinone] iron-sulfur protein 8, mitochondrial	Ndufs8	Q8K3J1	24	10	10	8	7	14	12	21	15	14.7218	10.2192	8.22804	7.86496	13.879	11.2443	18.1863	12.0074	4	4	8	0.131674	1.38824	0.377967	0.377967	1.38824	0.473257
Protein phosphatase 1 regulatory subunit 3A	Ppp1r3a	Q99MR9	121	0	0	0	0	5	27	31	26	0	0	0	0	4.95679	25.2996	26.8464	20.8128	0	4	4	2.45e-09	10000	7.46e-07	7.46e-07	10000	13.2877
40S ribosomal protein S16	Rps16	P14131	16	8	15	11	6	10	12	16	16	11.7774	15.3288	11.3136	6.74139	9.91359	11.2443	13.8562	12.8078	4	4	8	0.730534	1.07451	0.851979	0.851979	1.07451	0.103677
CDGSH iron-sulfur domain-containing protein 1	Cisd1	Q91WS0	12	11	12	10	10	14	18	17	11	16.194	12.263	10.2851	11.2357	13.879	16.8664	14.7222	8.8054	4	4	8	0.619986	1.10409	0.770337	0.770337	1.10409	0.142864
40S ribosomal protein S3	Rps3	P62908	27	12	13	8	15	14	10	10	13	17.6662	13.285	8.22804	16.8535	13.879	9.37021	8.66014	10.4064	4	4	8	0.169347	-1.32698	0.437521	0.437521	0.75359	-0.408149
Ig lambda-1 chain C region	NA	P01843	12	6	8	16	16	5	6	16	13	8.83308	8.17537	16.4561	17.977	4.95679	5.62213	13.8562	10.4064	4	4	8	0.0763921	-1.46695	0.313552	0.313552	0.681687	-0.552818
GrpE protein homolog 1, mitochondrial	Grpel1	Q99LP6	24	10	8	17	15	13	8	12	13	14.7218	8.17537	17.4846	16.8535	12.8877	7.49617	10.3922	10.4064	4	4	8	0.0939142	-1.41016	0.3273	0.3273	0.709138	-0.495861
3-hydroxyacyl-CoA dehydrogenase type-2	Hsd17b10	O08756	27	6	5	7	6	18	12	26	19	8.83308	5.1096	7.19954	6.74139	17.8445	11.2443	22.5164	15.2093	4	4	8	0.00300466	2.43333	0.0548051	0.0548051	2.43333	1.28293
60S ribosomal protein L6	Rpl6	P47911	34	5	13	13	11	13	8	15	13	7.3609	13.285	13.3706	12.3592	12.8877	7.49617	12.9902	10.4064	4	4	8	0.683988	-1.08964	0.821867	0.821867	0.91773	-0.123858
Histone H2B type 1-H	H2bc9	Q64478	14	13	9	8	8	7	18	6	14	19.1383	9.19729	8.22804	8.98852	6.93951	16.8664	5.19608	11.2069	4	4	8	0.71654	-1.11896	0.845387	0.845387	0.893689	-0.162156
60S ribosomal protein L8	Rpl8	P62918	28	11	11	10	11	9	8	9	12	16.194	11.2411	10.2851	12.3592	8.92223	7.49617	7.79413	9.60589	4	4	8	0.0892911	-1.46038	0.327042	0.327042	0.684755	-0.546341
NADH dehydrogenase [ubiquinone] flavoprotein 2, mitochondrial	Ndufv2	Q9D6J6	27	5	7	11	5	14	13	18	15	7.3609	7.15344	11.3136	5.61783	13.879	12.1813	15.5883	12.0074	4	4	8	0.0218201	1.69204	0.160483	0.160483	1.69204	0.758768
Ig kappa chain V-V region MOPC 173	NA	P01643	12	0	10	0	0	0	0	0	0	0	10.2192	0	0	0	0	0	0	1	0	1	0.0762572	-10000	0.313552	0.313552	0.0001	-13.2877
NADH dehydrogenase [ubiquinone] 1 beta subcomplex subunit 4	Ndufb4	Q9CQC7	15	6	13	9	10	12	15	12	14	8.83308	13.285	9.25655	11.2357	11.8963	14.0553	10.3922	11.2069	4	4	8	0.637853	1.10517	0.783991	0.783991	1.10517	0.144265
ATP synthase subunit epsilon, mitochondrial	Atp5f1e	P56382	6	10	10	10	8	10	14	16	8	14.7218	10.2192	10.2851	8.98852	9.91359	13.1183	13.8562	6.40392	4	4	8	0.9879	1.0033	0.995541	0.995541	1.0033	0.0047599
Cytochrome c oxidase subunit 5A, mitochondrial	Cox5a	P12787	16	10	11	9	8	10	11	13	9	14.7218	11.2411	9.25655	8.98852	9.91359	10.3072	11.2582	7.20442	4	4	8	0.606911	-1.12181	0.760227	0.760227	0.891417	-0.165828
Ig kappa chain V-VI region TEPC 601/TEPC 191	NA	P01677	12	8	5	9	6	8	8	11	7	11.7774	5.1096	9.25655	6.74139	7.93087	7.49617	9.52615	5.60343	4	4	8	0.839224	-1.05329	0.92336	0.92336	0.949405	-0.074904
Prelamin-A/C	Lmna	P48678	74	31	12	3	4	16	4	0	17	45.6376	12.263	3.08552	4.49426	15.8617	3.74809	0	13.6083	4	3	7	0.231406	-1.8016	0.494765	0.494765	0.555062	-0.84928
Protein-glutamine gamma-glutamyltransferase E	Tgm3	Q08189	77	3	3	9	0	12	0	3	0	4.41654	3.06576	9.25655	0	11.8963	0	2.59804	0	3	2	5	0.417046	-1.6126	0.628865	0.628865	0.620117	-0.689389
Acidic leucine-rich nuclear phosphoprotein 32 family member B	Anp32b	Q9EST5	31	11	11	13	8	12	11	8	9	16.194	11.2411	13.3706	8.98852	11.8963	10.3072	6.92811	7.20442	4	4	8	0.148472	-1.37455	0.403219	0.403219	0.727513	-0.458955
Transcription factor A, mitochondrial	Tfam	P40630	28	13	16	9	7	15	10	9	11	19.1383	16.3507	9.25655	7.86496	14.8704	9.37021	7.79413	8.8054	4	4	8	0.236765	-1.2844	0.494765	0.494765	0.778576	-0.361091
Peroxiredoxin-5, mitochondrial	Prdx5	P99029	22	11	14	12	8	10	11	14	14	16.194	14.3069	12.3421	8.98852	9.91359	10.3072	12.1242	11.2069	4	4	8	0.460765	-1.16512	0.638949	0.638949	0.85828	-0.22048
Acidic leucine-rich nuclear phosphoprotein 32 family member A	Anp32a	O35381	29	13	8	6	6	10	7	4	0	19.1383	8.17537	6.17103	6.74139	9.91359	6.55915	3.46406	0	4	3	7	0.0400728	-2.04642	0.220793	0.220793	0.488657	-1.03311
Malate dehydrogenase, cytoplasmic	Mdh1	P14152	37	6	11	12	14	11	9	11	12	8.83308	11.2411	12.3421	15.7299	10.9049	8.43319	9.52615	9.60589	4	4	8	0.253885	-1.27996	0.507438	0.507438	0.781274	-0.3561
NADH dehydrogenase [ubiquinone] iron-sulfur protein 3, mitochondrial	Ndufs3	Q9DCT2	30	8	6	7	11	17	13	16	12	11.7774	6.13152	7.19954	12.3592	16.8531	12.1813	13.8562	9.60589	4	4	8	0.132255	1.4023	0.378108	0.378108	1.4023	0.487792
Ferritin heavy chain	Fth1	P09528	21	8	11	11	10	12	14	15	12	11.7774	11.2411	11.3136	11.2357	11.8963	13.1183	12.9902	9.60589	4	4	8	0.82689	1.04691	0.914266	0.914266	1.04691	0.06614
Collagen alpha-2(VI) chain	Col6a2	Q02788	110	9	16	6	9	17	9	8	8	13.2496	16.3507	6.17103	10.1121	16.8531	8.43319	6.92811	6.40392	4	4	8	0.366778	-1.22445	0.605133	0.605133	0.816693	-0.292135
Gamma-enolase	Eno2	P17183	47	0	0	0	0	0	5	0	6	0	0	0	0	0	4.68511	0	4.80294	0	2	2	0.0194065	10000	0.152575	0.152575	10000	13.2877
Ig kappa chain V-II region 26-10	NA	P01631	12	7	10	8	11	6	11	10	10	10.3053	10.2192	8.22804	12.3592	5.94815	10.3072	8.66014	8.00491	4	4	8	0.376316	-1.23096	0.614478	0.614478	0.812376	-0.29978
NADH dehydrogenase [ubiquinone] iron-sulfur protein 6, mitochondrial	Ndufs6	P52503	13	4	3	11	10	13	11	17	12	5.88872	3.06576	11.3136	11.2357	12.8877	10.3072	14.7222	9.60589	4	4	8	0.105852	1.47792	0.345385	0.345385	1.47792	0.563572
40S ribosomal protein S7	Rps7	P62082	22	5	11	10	12	8	12	12	11	7.3609	11.2411	10.2851	13.4828	7.93087	11.2443	10.3922	8.8054	4	4	8	0.631948	-1.11292	0.779403	0.779403	0.89854	-0.154345
Fumarate hydratase, mitochondrial	Fh	P97807	54	5	8	7	11	14	12	12	11	7.3609	8.17537	7.19954	12.3592	13.879	11.2443	10.3922	8.8054	4	4	8	0.358011	1.23351	0.595814	0.595814	1.23351	0.302775
Pyruvate dehydrogenase protein X component, mitochondrial	Pdhx	Q8BKZ9	54	7	5	10	9	7	8	12	11	10.3053	5.1096	10.2851	10.1121	6.93951	7.49617	10.3922	8.8054	4	4	8	0.851603	-1.04644	0.930417	0.930417	0.955625	-0.0654837
40S ribosomal protein S29	Rps29	P62274	7	11	12	11	11	10	9	6	8	16.194	12.263	11.3136	12.3592	9.91359	8.43319	5.19608	6.40392	4	4	8	0.0183518	-1.75292	0.147282	0.147282	0.570476	-0.809763
Caveolae-associated protein 4	Cavin4	A2AMM0	41	9	10	10	12	12	11	10	13	13.2496	10.2192	10.2851	13.4828	11.8963	10.3072	8.66014	10.4064	4	4	8	0.522487	-1.14781	0.689592	0.689592	0.871225	-0.198882
Catalase	Cat	P24270	60	2	7	11	9	15	7	13	15	2.94436	7.15344	11.3136	10.1121	14.8704	6.55915	11.2582	12.0074	4	4	8	0.243013	1.34097	0.500408	0.500408	1.34097	0.42328
ATP synthase subunit g, mitochondrial	Atp5mg	Q9CPQ8	11	8	11	9	9	10	16	14	11	11.7774	11.2411	9.25655	10.1121	9.91359	14.9923	12.1242	8.8054	4	4	8	0.667748	1.09709	0.810901	0.810901	1.09709	0.133686
Ig kappa chain V-V region L6 (Fragment)	NA	P01638	13	9	9	9	10	8	7	9	10	13.2496	9.19729	9.25655	11.2357	7.93087	6.55915	7.79413	8.00491	4	4	8	0.155324	-1.40244	0.415171	0.415171	0.713043	-0.487938
CDGSH iron-sulfur domain-containing protein 3, mitochondrial	Cisd3	B1AR13	16	4	11	13	10	8	10	11	8	5.88872	11.2411	13.3706	11.2357	7.93087	9.37021	9.52615	6.40392	4	4	8	0.278993	-1.28488	0.52387	0.52387	0.778281	-0.361637
Isoleucine--tRNA ligase, mitochondrial	Iars2	Q8BIJ6	113	5	2	15	6	12	9	14	11	7.3609	2.04384	15.4276	6.74139	11.8963	8.43319	12.1242	8.8054	4	4	8	0.287815	1.3142	0.52387	0.52387	1.3142	0.394184
Ig heavy chain V region 102	NA	P01750	13	0	7	0	4	4	7	8	7	0	7.15344	0	4.49426	3.96544	6.55915	6.92811	5.60343	2	4	6	0.0844335	2.68249	0.323848	0.323848	2.68249	1.42357
Methylcrotonoyl-CoA carboxylase beta chain, mitochondrial	Mccc2	Q3ULD5	61	0	4	7	7	17	14	19	15	0	4.08768	7.19954	7.86496	16.8531	13.1183	16.4543	12.0074	3	4	7	0.0154928	3.02822	0.133088	0.133088	3.02822	1.59847
40S ribosomal protein S20	Rps20	P60867	13	10	11	7	6	8	14	13	13	14.7218	11.2411	7.19954	6.74139	7.93087	13.1183	11.2582	10.4064	4	4	8	0.61553	1.11903	0.76689	0.76689	1.11903	0.162248
60S ribosomal protein L12	Rpl12	P35979	18	7	8	13	6	9	9	12	13	10.3053	8.17537	13.3706	6.74139	8.92223	8.43319	10.3922	10.4064	4	4	8	0.982215	-1.00514	0.992005	0.992005	0.994888	-0.00739444
60S ribosomal protein L10-like	Rpl10l	P86048	25	5	10	8	5	8	9	8	14	7.3609	10.2192	8.22804	5.61783	7.93087	8.43319	6.92811	11.2069	4	4	8	0.703962	1.09864	0.834868	0.834868	1.09864	0.135721
Adenylate kinase isoenzyme 1	Ak1	Q9R0Y5	22	7	9	11	4	12	12	15	14	10.3053	9.19729	11.3136	4.49426	11.8963	11.2443	12.9902	11.2069	4	4	8	0.178566	1.35157	0.454422	0.454422	1.35157	0.434631
Histone H2A type 2-C	H2ac20	Q64523	14	10	7	5	4	2	5	2	10	14.7218	7.15344	5.14253	4.49426	1.98272	4.68511	1.73203	8.00491	4	4	8	0.205221	-1.81382	0.489981	0.489981	0.551323	-0.859029
Dynamin-like 120 kDa protein, mitochondrial	Opa1	P58281	111	4	7	10	7	5	9	14	8	5.88872	7.15344	10.2851	7.86496	4.95679	8.43319	12.1242	6.40392	4	4	8	0.902441	1.0314	0.955896	0.955896	1.0314	0.0446083
Ferrochelatase, mitochondrial	Fech	P22315	47	7	7	8	8	15	9	13	13	10.3053	7.15344	8.22804	8.98852	14.8704	8.43319	11.2582	10.4064	4	4	8	0.270836	1.28713	0.52387	0.52387	1.28713	0.364153
Voltage-dependent anion-selective channel protein 1	Vdac1	Q60932	32	2	9	4	5	5	4	6	9	2.94436	9.19729	4.11402	5.61783	4.95679	3.74809	5.19608	7.20442	4	4	8	0.862738	-1.05389	0.936245	0.936245	0.948866	-0.0757235
Cytochrome c, somatic	Cycs	P62897	12	2	9	12	5	9	18	15	7	2.94436	9.19729	12.3421	5.61783	8.92223	16.8664	12.9902	5.60343	4	4	8	0.124518	1.4354	0.368231	0.368231	1.4354	0.521457
AFG3-like protein 2	Afg3l2	Q8JZQ2	90	0	3	11	5	9	12	10	13	0	3.06576	11.3136	5.61783	8.92223	11.2443	8.66014	10.4064	3	4	7	0.0923473	2.19732	0.3273	0.3273	2.19732	1.13574
Ig heavy chain V region 1-72	Ighv1-72	P06328	13	3	11	4	4	4	7	4	8	4.41654	11.2411	4.11402	4.49426	3.96544	6.55915	3.46406	6.40392	4	4	8	0.56423	-1.18828	0.723737	0.723737	0.841553	-0.248874
Ig kappa chain V-V region K2 (Fragment)	NA	P01635	13	3	14	11	7	6	14	10	9	4.41654	14.3069	11.3136	7.86496	5.94815	13.1183	8.66014	7.20442	4	4	8	0.686144	-1.09894	0.823373	0.823373	0.909964	-0.136119
60S ribosomal protein L27	Rpl27	P61358	16	7	11	7	6	7	8	12	11	10.3053	11.2411	7.19954	6.74139	6.93951	7.49617	10.3922	8.8054	4	4	8	0.899564	-1.03109	0.954178	0.954178	0.969844	-0.0441754
Dehydrogenase/reductase SDR family member 4	Dhrs4	Q99LB2	30	7	7	7	14	8	9	9	11	10.3053	7.15344	7.19954	15.7299	7.93087	8.43319	7.79413	8.8054	4	4	8	0.393672	-1.22367	0.618242	0.618242	0.817217	-0.291209
Ubiquitin-like modifier-activating enzyme 1	Uba1	Q02053	118	2	9	14	9	11	7	11	17	2.94436	9.19729	14.3991	10.1121	10.9049	6.55915	9.52615	13.6083	4	4	8	0.773545	1.07574	0.882945	0.882945	1.07574	0.105331
[truncated: 620 more rows]
