# Supplementary material for: Proteomic Landscape and Deduced Functions of the Cardiac 14-3-3 Protein Interactome
Source: Cells. 2022 Nov 4;11(21):3496. doi: 10.3390/cells11213496 (PMC9654263; doi:10.3390/cells11213496)
Supplement: Supplementary file 1 [file cells-11-03496-s001.zip › supplementary_TableS7-overlap_of countdata_QSPEC.xlsx]

## Sheet: Sheet1
Supplementary Table S7. Overlap of two statistical methods countdata and QSPEC.
ProteinName	GeneName	Accession	Weight	IgG_1	IgG_2	IgG_3	IgG_4	IP_1	IP_2	IP_3	IP_4	nonzero_IgG	nonzero_IP	nonzero	countdata_FC	countdata_log2FC	countdata_FDR	QSPEC_FC	QSPEC_log2FC	QSPEC_FDR	TTEST_FC	TTEST_log2FC	TTEST_FDR
Glycogen phosphorylase, muscle form	Pygm	Q9WUB3	97	57	91	97	96	137	175	208	214	4	4	8	1.69868	0.764416	0.00645792	1.70916	0.773285	0	1.72448	0.78616	0.0127959
Isocitrate dehydrogenase [NADP], mitochondrial	Idh2	P54071	51	58	80	115	78	117	125	159	152	4	4	8	1.31671	0.396942	0.0592655	1.32313	0.403955	0	1.36231	0.446051	0.181309
14-3-3 protein beta/alpha	Ywhab	Q9CQV8	28	14	9	9	12	162	258	277	290	4	4	8	16.492	4.0437	4.03e-06	16.9964	4.08716	0	19.2517	4.26691	0.0511075
2-oxoglutarate dehydrogenase, mitochondrial	Ogdh	Q60597	116	45	76	123	81	109	144	187	193	4	4	8	1.5456	0.628171	0.038202	1.54806	0.630458	0	1.61805	0.694255	0.160223
von Willebrand factor A domain-containing protein 8	Vwa8	Q8CC88	213	15	23	42	35	125	252	244	221	4	4	8	5.79645	2.53517	0.00118424	5.76612	2.5276	0	6.30174	2.65575	0.0534751
Vimentin	Vim	P20152	54	22	47	13	32	122	170	135	175	4	4	8	4.28702	2.09997	0.00645792	4.17452	2.06161	0	5.01005	2.32483	0.129368
14-3-3 protein theta	Ywhaq	P68254	28	0	0	0	6	30	102	124	139	1	4	5	57.475	5.84486	7.73e-09	32.1367	5.00615	0	Inf	Inf	0.337538
Elongation factor Tu, mitochondrial	Tufm	Q8BFR5	50	32	37	56	42	73	72	93	76	4	4	8	1.47874	0.564372	0.0569274	1.49631	0.581406	0	1.52783	0.611481	0.146785
Long-chain specific acyl-CoA dehydrogenase, mitochondrial	Acadl	P51174	48	29	35	42	29	54	55	64	64	4	4	8	1.37967	0.464326	0.0975164	1.38819	0.473204	5.4e-05	1.41198	0.497723	0.124969
Dihydrolipoyllysine-residue succinyltransferase component of 2-oxoglutarate dehydrogenase complex, mitochondrial	Dlst	Q9D2G2	49	15	20	21	22	33	34	47	48	4	4	8	1.62768	0.70282	0.0634906	1.63722	0.711249	2e-06	1.64942	0.721955	0.0703626
Alpha-actinin-4	Actn4	P57780	105	5	16	14	8	25	49	49	64	4	4	8	3.47281	1.7961	0.0123518	3.41439	1.77163	0	3.79517	1.92416	0.11989
14-3-3 protein epsilon	Ywhae	P62259	29	9	4	7	6	15	30	33	42	4	4	8	3.34631	1.74257	0.0908825	3.50784	1.81058	0	4.19969	2.07028	0.368458
Protein SGT1 homolog	Sugt1	Q9CX34	38	0	0	0	0	41	52	52	57	0	4	4	10000	13.2877	5.13e-10	24.4346	4.61085	0	Inf	Inf	6.70731e-06
14-3-3 protein eta	Ywhah	P68510	28	0	0	0	0	0	15	0	16	0	2	2	10000	13.2877	0.0262958	4.94314	2.30543	4e-06	NA	NA	0.542371
Sodium/potassium-transporting ATPase subunit alpha-2	Atp1a2	Q6PIE5	112	0	0	15	0	0	14	16	17	1	3	4	4	2	0.0781801	2.16193	1.11232	0.000301	NA	NA	0.542371
Alpha-actinin-1	Actn1	Q7TPR4	103	0	0	0	0	0	0	21	23	0	2	2	10000	13.2877	0.0123518	6.06176	2.59974	0	NA	NA	0.542371
Ig gamma-2A chain C region, membrane-bound form	Igh-1a	P01865	44	0	0	0	0	0	7	10	6	0	3	3	10000	13.2877	0.00942497	3.8076	1.92888	0.000228	NA	NA	0.368458
ATP-dependent 6-phosphofructokinase, liver type	Pfkl	P12382	85	0	0	0	0	8	7	8	8	0	4	4	10000	13.2877	0.000383193	4.75406	2.24916	1e-06	Inf	Inf	0.000188899
Protein phosphatase 1 regulatory subunit 3A	Ppp1r3a	Q99MR9	121	0	0	0	0	5	27	31	26	0	4	4	10000	13.2877	7.46e-07	11.0452	3.46535	0	Inf	Inf	0.00409544
3-hydroxyacyl-CoA dehydrogenase type-2	Hsd17b10	O08756	27	6	5	7	6	18	12	26	19	4	4	8	2.43333	1.28293	0.0548051	2.36553	1.24216	1e-06	2.44163	1.28785	0.0672964
Voltage-dependent anion-selective channel protein 3	Vdac3	Q60931	31	0	0	2	2	4	6	9	7	2	4	6	5.16319	2.36826	0.0598274	2.86337	1.51772	0.001649	Inf	Inf	0.542371
ATP-dependent 6-phosphofructokinase, platelet type	Pfkp	Q9WUA3	85	0	0	0	0	4	0	5	4	0	3	3	10000	13.2877	0.0591416	2.25016	1.17003	0.024844	NA	NA	0.368458
Microtubule-associated protein 4	Map4	P27546	117	0	0	6	2	8	7	13	11	2	4	6	4.83045	2.27216	0.0653653	2.82639	1.49896	2.7e-05	Inf	Inf	0.542371
NADH dehydrogenase [ubiquinone] 1 beta subcomplex subunit 10	Ndufb10	Q9DCS9	21	0	3	0	0	6	6	11	15	1	4	5	9.60179	3.2633	0.0105613	4.27592	2.09624	1e-06	Inf	Inf	0.368458
Histone-lysine N-methyltransferase Smyd1	Smyd1	P97443	56	0	0	0	0	6	9	16	8	0	4	4	10000	13.2877	0.000139785	5.55668	2.47422	0	Inf	Inf	0.00060762
Ras-related protein Rab-1B	Rab1b	Q9D1G1	22	0	0	0	0	4	6	7	6	0	4	4	10000	13.2877	0.00141649	3.62553	1.85819	0.00061	Inf	Inf	0.000105486
Monocarboxylate transporter 1	Slc16a1	P53986	53	0	2	2	2	4	6	9	7	3	4	7	3.4723	1.79589	0.0902225	2.59089	1.37345	0.002237	Inf	Inf	0.54268
NADH dehydrogenase [ubiquinone] 1 beta subcomplex subunit 6	Ndufb6	Q3UIU2	16	0	2	4	0	5	6	11	9	2	4	6	4.14556	2.05157	0.0727352	2.81792	1.49463	0.000335	Inf	Inf	0.542371
Acyl-coenzyme A thioesterase 2, mitochondrial	Acot2	Q9QYR9	50	0	0	4	0	6	6	9	6	1	4	5	7.26446	2.86086	0.0429941	2.73738	1.45279	0.001051	Inf	Inf	0.368458
Collagen alpha-2(I) chain	Col1a2	Q01149	130	0	0	0	0	4	0	2	6	0	3	3	10000	13.2877	0.0727352	2.02182	1.01566	0.077653	NA	NA	0.368458
Protein FAM210A	Fam210a	Q8BGY7	32	0	3	0	0	2	7	7	4	1	4	5	7.18494	2.84498	0.0727352	2.31174	1.20898	0.010088	Inf	Inf	0.368458
Ryanodine receptor 2	Ryr2	E9Q401	565	0	0	0	0	0	2	6	4	0	3	3	10000	13.2877	0.0653653	2.06267	1.04451	0.081213	NA	NA	0.368458
Valine--tRNA ligase	Vars1	Q9Z1Q9	140	0	0	0	0	3	3	4	6	0	4	4	10000	13.2877	0.00747359	2.58054	1.36767	0.01222	Inf	Inf	0.000499521
Rho guanine nucleotide exchange factor 5	Arhgef5	E9Q7D5	177	0	0	0	0	0	8	5	7	0	3	3	10000	13.2877	0.0136564	3.20592	1.68074	0.001754	NA	NA	0.368458
Cell division control protein 42 homolog	Cdc42	P60766	21	0	0	0	0	2	4	5	10	0	4	4	10000	13.2877	0.00341162	3.34344	1.74133	0.000671	Inf	Inf	0.00161288
Ras-related C3 botulinum toxin substrate 1	Rac1	P63001	21	0	2	0	0	3	3	4	10	1	4	5	7.58221	2.92262	0.0653653	2.55998	1.35613	0.012831	Inf	Inf	0.368458
ATP-dependent RNA helicase DDX1	Ddx1	Q91VR5	83	0	0	0	0	2	2	5	5	0	4	4	10000	13.2877	0.0123518	2.32333	1.21619	0.03645	Inf	Inf	0.001411
Kinesin-1 heavy chain	Kif5b	Q61768	110	0	0	0	0	4	6	9	5	0	4	4	10000	13.2877	0.00128164	3.49384	1.80481	0.000431	Inf	Inf	0.000504326
X-ray repair cross-complementing protein 5	Xrcc5	P27641	83	0	0	0	0	6	7	0	7	0	3	3	10000	13.2877	0.016432	3.43838	1.78173	0.001077	NA	NA	0.368458
Coagulation factor XIII A chain	F13a1	Q8BH61	83	0	0	0	0	4	5	5	6	0	4	4	10000	13.2877	0.00301353	3.16135	1.66054	0.001493	Inf	Inf	4.16927e-05
NADH dehydrogenase [ubiquinone] 1 beta subcomplex subunit 9	Ndufb9	Q9CQJ8	22	0	0	0	0	3	2	8	0	0	3	3	10000	13.2877	0.0634906	2.35137	1.2335	0.030402	NA	NA	0.368458
39S ribosomal protein L37, mitochondrial	Mrpl37	Q921S7	48	0	0	0	0	0	4	4	6	0	3	3	10000	13.2877	0.0429941	2.21002	1.14406	0.030687	NA	NA	0.368458
Elongation factor 1-delta	Eef1d	P57776	31	0	2	0	0	4	3	5	5	1	4	5	7.24237	2.85646	0.0781801	2.35373	1.23495	0.020823	Inf	Inf	0.368458
T-complex protein 1 subunit alpha	Tcp1	P11983	60	0	0	0	0	0	2	5	6	0	3	3	10000	13.2877	0.0587443	2.2056	1.14117	0.046721	NA	NA	0.368458
Nucleoside diphosphate-linked moiety X motif 8	Nudt8	Q9CR24	23	0	0	0	0	3	0	5	4	0	3	3	10000	13.2877	0.0653653	2.21444	1.14694	0.0593	NA	NA	0.368458
Mitochondrial proton/calcium exchanger protein	Letm1	Q9Z2I0	83	0	0	0	0	0	2	5	4	0	3	3	10000	13.2877	0.072566	1.97981	0.985361	0.087614	NA	NA	0.368458
5'-AMP-activated protein kinase subunit gamma-1	Prkag1	O54950	38	0	0	0	0	4	3	5	5	0	4	4	10000	13.2877	0.0062225	2.66712	1.41528	0.010679	Inf	Inf	0.000338022
X-ray repair cross-complementing protein 6	Xrcc6	P23475	69	0	0	0	0	5	5	3	4	0	4	4	10000	13.2877	0.0062225	2.55231	1.35181	0.013055	Inf	Inf	0.000873897
Reticulon-2	Rtn2	O70622	51	0	0	0	0	0	4	5	2	0	3	3	10000	13.2877	0.0682529	1.99372	0.99546	0.096626	NA	NA	0.368458
Inosine-5'-monophosphate dehydrogenase 2	Impdh2	P24547	56	0	0	0	0	2	6	4	6	0	4	4	10000	13.2877	0.00548246	2.86051	1.51627	0.006219	Inf	Inf	0.00107985
28S ribosomal protein S29, mitochondrial	Dap3	Q9ER88	45	0	0	0	0	2	0	5	5	0	3	3	10000	13.2877	0.0682529	2.11277	1.07914	0.070789	NA	NA	0.368458
Mitofusin-1	Mfn1	Q811U4	84	0	0	0	0	5	2	5	5	0	4	4	10000	13.2877	0.00645792	2.71828	1.4427	0.008721	Inf	Inf	0.00175948
