# Supplementary material for: Proteomic Landscape and Deduced Functions of the Cardiac 14-3-3 Protein Interactome
Source: Cells. 2022 Nov 4;11(21):3496. doi: 10.3390/cells11213496 (PMC9654263; doi:10.3390/cells11213496)
Supplement: Supplementary file 1 [file cells-11-03496-s001.zip › supplementary_TableS9-BioPlex_and_our_cardiac_1433_interactome.xlsx]

## Sheet: Sheet1
Supplementary Table S9. Proteins identified in this study or recorded in BioPlex database.
Binding partners in each dataset			Intersection
BioPlex_293T	BioPlex_HCT116	Our_interactime	BioPlex_293T_HCT116	BioPlex_293T_our_interactome
YWHAQ	CDR2L	PYGM	WWTR1	YWHAQ
YWHAG	SNX33	IDH2	TFEB	YWHAE
YWHAE	PRICKLE3	YWHAB	EPB49	YWHAH
YWHAZ	REEP1	OGDH	SMTNL2	KIF5B
YWHAH	SMTNL2	VWA8	SAMD4A	YWHAB
AKT1S1	SAMD4B	VIM	SFN
GAB2	NCKIPSD	YWHAQ	SAMD4B
WWC2	SAMD4A	TUFM	GPSM3
KLC1	SFN	ACADL	LNP1
KLC3	PTPDC1	DLST	PRICKLE3
KLC2	SH2D3A	ACTN4	SNX33
KLC4	TFEB	YWHAE	CDR2L
PACS2	FAM163A	SUGT1
EML3	WWTR1	YWHAH
FOXO3	ANKRD55	ATP1A2
RAI14	KSR2	ACTN1
OSBPL3	GPSM3	IGH-1A
FRYL	LNP1	PFKL
LSR	EPB49	PPP1R3A
C5orf30		HSD17B10
PARD3		VDAC3
AKAP13		PFKP
KIF23		MAP4
MPRIP		NDUFB10
MAST2		SMYD1
SRGAP1		RAB1B
SRGAP2		SLC16A1
RABEP1		NDUFB6
DOCK9		ACOT2
DOCK11		COL1A2
MARK3		FAM210A
MARK2		RYR2
MARK1		VARS1
INPP5E		ARHGEF5
UACA		CDC42
CLASP2		RAC1
CLASP1		DDX1
LMO7		KIF5B
TIAM1		XRCC5
CDC25B		F13A1
DMWD		NDUFB9
C19orf26		MRPL37
DENND4A		EEF1D
TAOK1		TCP1
PAK4		NUDT8
RAB11FIP2		LETM1
ALS2		PRKAG1
SIPA1L1		XRCC6
SIPA1L2		RTN2
FAM82A2		IMPDH2
MAP3K2		DAP3
MAP3K3		MFN1
BAIAP2
TBC1D1
TBC1D4
ZNF638
RABGEF1
ABLIM1
KIF1C
KIF1B
KIF13B
CEP89
KIF5C
KIF5B
KIF5A
ZNF395
HIVEP1
TSC2
SLC4A7
PLK4
RICTOR
EPN2
USP8
DLG5
WWTR1
KIF21B
PHLDB2
ZNF295
NEK1
FGD6
RASAL2
DAB2IP
ARHGAP21
ARHGAP23
CIC
SH3BP5L
ARHGEF16
SH3PXD2A
HDAC4
HDAC7
HDAC5
FOXO6
FOXO4
FOXO1
ANKS1A
FAM117A
IRS2
SLAIN1
FAM117B
RGS12
PPFIBP1
ZFP36L2
PFKFB2
PFKFB3
PFKFB4
PHF3
SIPA1L3
SH3RF3
C1orf9
WDR62
PANK2
TRAPPC10
PLEKHA7
FAM53B
MLLT4
CLK2
PIK3C2A
FRMD6
MTMR4
MTMR3
SSFA2
PLCH1
ZAK
COBLL1
SHROOM1
OSBPL6
PPFIA1
PLEKHG5
CHAF1A
FOXK1
WASF2
WASF3
C12orf51
CDK17
CDK18
CRTC3
RAF1
BRAF
BCR
WNK1
LUZP1
SASH1
SIPA1
GRIP1
CCDC6
USP43
SH3BP4
TFEB
KIAA1804
ARHGEF2
CGN
CDC25C
APC
SPIRE1
PTPN14
CCDC88A
PI4KB
REEP3
PIK3C2B
GPBP1L1
PLEKHO2
IRS1
CBY1
MAPKAP1
SPIRE2
WDR37
ARHGAP32
EPB49
RALGPS2
REEP4
CAMSAP1L1
N4BP3
RFX7
PRR5
MAGI1
ABL1
PTPN3
DENND4C
R3HDM1
VASH2
ABI2
GAPVD1
CLK3
UVRAG
NADK
FAM82A1
NUMBL
NAV1
SPEG
WASF1
YAP1
C21orf2
R3HDM2
KSR1
RASSF8
AMOTL2
SYNJ2
ERC1
SLAIN2
ARHGAP19
ARHGEF17
MITF
MICALL1
HPCAL1
TSC1
PHACTR4
KIAA1429
CGNL1
SYDE2
CBL
SHROOM3
AGAP1
VPS13D
USP12
SMTNL2
CRTC1
CRTC2
RACGAP1
ATG9A
TESK2
SAMD4A
BECN1
PPP1R3D
CCDC45
RIPK4
HOMEZ
ITPKB
GRID2IP
GLCCI1
SRSF12
FAM83G
MIIP
FAM53C
BAD
LRFN4
LATS1
SPECC1L
IGLC7
EDC3
PLEKHM3
HIVEP2
FGB
FGG
IGHG2
IGHG1
EPB41L3
ALB
BAZ1A
C2orf49
EPPK1
HBB
PTOV1
CDSN
IGHM
SERPINA1
FAM190B
PLG
TFE3
F2
VTN
SFN
TP53BP2
GIGYF2
WNK2
MAST3
MAST1
NF1
MAP3K7
DYRK1A
SRRM2
CEP170
MYCBP2
PLEKHA2
PPP1R12A
SHCBP1
WWC1
MTM1
CKAP5
PIK3C3
DOCK7
TJP2
EXO1
DDX6
MAP3K5
MAP3K15
SPRYD3
MAP7D3
TRAPPC9
CBX4
CDC42BPA
NDRG1
ARAF
USP54
AMPD2
NHSL1
TANC2
SGK223
PSD3
PPM1H
RB1CC1
RHBDF2
CWC22
LATS2
PACS1
HERC1
DCP1B
ZC3H13
ATXN1L
PEAK1
TAB2
PNN
FAM110B
LRCH2
WEE1
TTC28
NKTR
FAM13A
CHEK1
MAP2K1
MTMR10
USP21
PLEKHA5
PPHLN1
NEDD4L
KIAA0226
FRMD4A
ISCU
RHPN2
GIGYF1
CDC42BPG
SORBS1
MEX3B
MEX3C
GIT1
ARHGEF4
CENPJ
PTPN13
SPATA18
TAB3
SRSF10
SRSF8
TCF20
SIK3
CYTH2
FBXO45
KIAA0930
TRIP11
TBC1D3G
SAMD4B
AFAP1L1
EPB41L1
MAP3K6
RIN1
DENND2C
FAM59A
PKP2
PLEKHG2
PPFIBP2
CCDC46
PLEKHG3
PPIP5K2
PSD4
GPSM3
ATAT1
LNP1
FGA
FAM122B
RND3
SRSF1
YWHAB
FAM86C
RBM7
FAM122A
TBC1D7
EIF4E2
NKD2
FLCN
STAC
FAM189A2
TBC1D22B
CDC25A
GIT2
TTLL7
PPIL2
FAM124A
RBM15B
WDR20
PRICKLE3
SPATA13
PAK6
ARHGEF7
CD28
CCNY
ARHGEF6
SHKBP1
MACC1
C6orf222
PHACTR2
RAB11FIP1
TBC1D25
KIF7
ATXN1
CDK14
SSX2IP
NCKAP1
PARP8
PDE7B
SNX33
CDR2L
ERRFI1
PLEKHA3
SYNGAP1
KIAA0889
PRKD2
GUCA1B
KIAA1211
