# Supplementary material for: Proteomic Landscape and Deduced Functions of the Cardiac 14-3-3 Protein Interactome
Source: Cells. 2022 Nov 4;11(21):3496. doi: 10.3390/cells11213496 (PMC9654263; doi:10.3390/cells11213496)
Supplement: Supplementary file 1 [file cells-11-03496-s001.zip › supplementary_TableS10-predicted_binding_sites.csv]

Supplementary Table S10. Predicted 14-3-3 binding sites by 14-3-3-Pred webserver.
Site	Peptide_[-6:4]	ANN	PSSM	SVM	Consensus	pSer/Thr	UniProt_ID	ProteinName	GeneName
16	EIQFLRtDDEV	0.252	0.146	-1.053	-0.218	-	E9Q401	Ryanodine receptor 2	Ryr2
25	EVVLQCtATIH	0.116	-0.145	-1.617	-0.549	-	E9Q401	Ryanodine receptor 2	Ryr2
27	VLQCTAtIHKE	0.262	0.052	-0.762	-0.149	-	E9Q401	Ryanodine receptor 2	Ryr2
51	RLCFLEsTSNS	0.164	-0.026	-1.371	-0.411	-	E9Q401	Ryanodine receptor 2	Ryr2
52	LCFLEStSNSK	0.081	-0.199	-1.418	-0.512	-	E9Q401	Ryanodine receptor 2	Ryr2
53	CFLESTsNSKN	0.203	0.11	-0.626	-0.104	-	E9Q401	Ryanodine receptor 2	Ryr2
55	LESTSNsKNVP	0.323	0.137	-0.438	0.008	-	E9Q401	Ryanodine receptor 2	Ryr2
63	NVPPDLsICTF	0.029	-0.42	-1.663	-0.685	-	E9Q401	Ryanodine receptor 2	Ryr2
66	PDLSICtFVLE	0.205	-0.096	-0.777	-0.223	-	E9Q401	Ryanodine receptor 2	Ryr2
72	TFVLEQsLSVR	0.218	0.001	-0.701	-0.161	-	E9Q401	Ryanodine receptor 2	Ryr2
74	VLEQSLsVRAL	0.513	0.263	0.253	0.343	-	E9Q401	Ryanodine receptor 2	Ryr2
85	QEMLANtVEKS	0.18	0.038	-1.049	-0.277	-	E9Q401	Ryanodine receptor 2	Ryr2
89	ANTVEKsEGQV	0.265	-0.051	-0.727	-0.171	-	E9Q401	Ryanodine receptor 2	Ryr2
104	WKFMMKtAQGG	0.548	0.007	-0.015	0.18	-	E9Q401	Ryanodine receptor 2	Ryr2
112	QGGGHRtLLYG	0.14	-0.027	-0.949	-0.279	-	E9Q401	Ryanodine receptor 2	Ryr2
124	AILLRHsYSGM	0.284	0.116	-0.569	-0.056	-	E9Q401	Ryanodine receptor 2	Ryr2
126	LLRHSYsGMYL	0.629	0.54	0.411	0.527	-	E9Q401	Ryanodine receptor 2	Ryr2
134	MYLCCLsTSRS	0.216	-0.112	-1.07	-0.322	-	E9Q401	Ryanodine receptor 2	Ryr2
135	YLCCLStSRSS	0.082	-0.22	-1.408	-0.515	-	E9Q401	Ryanodine receptor 2	Ryr2
136	LCCLSTsRSST	0.156	-0.015	-0.996	-0.285	-	E9Q401	Ryanodine receptor 2	Ryr2
138	CLSTSRsSTDK	0.552	0.21	-0.192	0.19	-	E9Q401	Ryanodine receptor 2	Ryr2
139	LSTSRSsTDKL	0.165	-0.038	-0.759	-0.211	-	E9Q401	Ryanodine receptor 2	Ryr2
140	STSRSStDKLA	0.613	0.888	0.222	0.574	-	E9Q401	Ryanodine receptor 2	Ryr2
153	VGLQEDtTGEA	0.256	-0.184	-0.749	-0.226	-	E9Q401	Ryanodine receptor 2	Ryr2
154	GLQEDTtGEAC	0.198	0.032	-0.843	-0.205	-	E9Q401	Ryanodine receptor 2	Ryr2
161	GEACWWtIHPA	0.294	-0.124	-0.718	-0.182	-	E9Q401	Ryanodine receptor 2	Ryr2
166	WTIHPAsKQRS	0.162	-0.233	-0.972	-0.348	-	E9Q401	Ryanodine receptor 2	Ryr2
170	PASKQRsEGEK	0.334	0.036	-0.712	-0.114	-	E9Q401	Ryanodine receptor 2	Ryr2
185	DDLILVsVSSE	0.066	-0.303	-1.524	-0.587	-	E9Q401	Ryanodine receptor 2	Ryr2
187	LILVSVsSERY	0.384	0.147	-0.439	0.031	-	E9Q401	Ryanodine receptor 2	Ryr2
188	ILVSVSsERYL	0.23	-0.057	-0.767	-0.198	-	E9Q401	Ryanodine receptor 2	Ryr2
195	ERYLHLsYGNS	0.125	0.191	-1.018	-0.234	-	E9Q401	Ryanodine receptor 2	Ryr2
199	HLSYGNsSWHV	0.248	0.062	-0.749	-0.146	-	E9Q401	Ryanodine receptor 2	Ryr2
200	LSYGNSsWHVD	0.119	-0.027	-0.767	-0.225	-	E9Q401	Ryanodine receptor 2	Ryr2
210	DAAFQQtLWSV	0.279	0.032	-0.875	-0.188	-	E9Q401	Ryanodine receptor 2	Ryr2
213	FQQTLWsVAPI	0.167	-0.063	-0.792	-0.229	-	E9Q401	Ryanodine receptor 2	Ryr2
218	WSVAPIsSGSE	0.089	-0.33	-1.095	-0.445	-	E9Q401	Ryanodine receptor 2	Ryr2
219	SVAPISsGSEA	0.039	-0.339	-1.316	-0.539	-	E9Q401	Ryanodine receptor 2	Ryr2
221	APISSGsEAAQ	0.179	0.033	-0.885	-0.225	-	E9Q401	Ryanodine receptor 2	Ryr2
246	HMDECLtVPSG	0.233	0.528	-0.415	0.115	-	E9Q401	Ryanodine receptor 2	Ryr2
249	ECLTVPsGEHG	0.111	-0.214	-1.138	-0.414	-	E9Q401	Ryanodine receptor 2	Ryr2
259	GEEQRRtVHYE	0.386	0.073	-0.72	-0.087	-	E9Q401	Ryanodine receptor 2	Ryr2
268	YEGGAVsVHAR	0.379	0.123	-0.276	0.075	-	E9Q401	Ryanodine receptor 2	Ryr2
273	VSVHARsLWRL	0.36	0.015	-0.63	-0.085	-	E9Q401	Ryanodine receptor 2	Ryr2
279	SLWRLEtLRVA	0.629	0.944	0.303	0.625	-	E9Q401	Ryanodine receptor 2	Ryr2
285	TLRVAWsGSHI	0.364	0.173	-0.239	0.099	-	E9Q401	Ryanodine receptor 2	Ryr2
287	RVAWSGsHIRW	0.278	0.072	-0.428	-0.026	-	E9Q401	Ryanodine receptor 2	Ryr2
301	FRLRHVtTGKY	0.893	1.253	0.93	1.025	-	E9Q401	Ryanodine receptor 2	Ryr2
302	RLRHVTtGKYL	0.453	0.257	-0.215	0.165	-	E9Q401	Ryanodine receptor 2	Ryr2
307	TTGKYLsLMED	0.442	0.064	-0.351	0.052	-	E9Q401	Ryanodine receptor 2	Ryr2
326	EKADVKsTAFA	0.229	-0.08	-0.605	-0.152	-	E9Q401	Ryanodine receptor 2	Ryr2
327	KADVKStAFAF	0.05	-0.205	-1.468	-0.541	-	E9Q401	Ryanodine receptor 2	Ryr2
333	TAFAFRsSKEK	0.094	-0.26	-1.435	-0.534	-	E9Q401	Ryanodine receptor 2	Ryr2
334	AFAFRSsKEKL	0.228	0.061	-0.542	-0.084	-	E9Q401	Ryanodine receptor 2	Ryr2
351	EVDGMGtSEIK	0.053	-0.326	-1.433	-0.569	-	E9Q401	Ryanodine receptor 2	Ryr2
352	VDGMGTsEIKY	0.057	-0.217	-1.246	-0.469	-	E9Q401	Ryanodine receptor 2	Ryr2
359	EIKYGDsICYI	0.112	-0.168	-0.926	-0.327	-	E9Q401	Ryanodine receptor 2	Ryr2
368	YIQHVDtGLWL	0.144	-0.03	-0.956	-0.281	-	E9Q401	Ryanodine receptor 2	Ryr2
373	DTGLWLtYQAV	0.158	-0.059	-1.197	-0.366	-	E9Q401	Ryanodine receptor 2	Ryr2
381	QAVDVKsARMG	0.23	-0.116	-0.962	-0.283	-	E9Q401	Ryanodine receptor 2	Ryr2
386	KSARMGsIQRK	0.397	0.454	-0.172	0.226	-	E9Q401	Ryanodine receptor 2	Ryr2
406	DDGLNLsRSQH	0.032	-0.508	-1.989	-0.822	-	E9Q401	Ryanodine receptor 2	Ryr2
408	GLNLSRsQHEE	0.491	0.242	-0.677	0.019	-	E9Q401	Ryanodine receptor 2	Ryr2
413	RSQHEEsRTAR	0.234	-0.134	-1.026	-0.309	-	E9Q401	Ryanodine receptor 2	Ryr2
415	QHEESRtARVI	0.247	0.166	-0.83	-0.139	-	E9Q401	Ryanodine receptor 2	Ryr2
421	TARVIRsTVFL	0.1	0.038	-1.089	-0.317	-	E9Q401	Ryanodine receptor 2	Ryr2
422	ARVIRStVFLF	0.203	0.267	-0.65	-0.06	-	E9Q401	Ryanodine receptor 2	Ryr2
437	RGLDALsKKVK	0.199	-0.025	-0.686	-0.171	-	E9Q401	Ryanodine receptor 2	Ryr2
444	KKVKLPtIDLP	0.206	-0.097	-0.777	-0.223	-	E9Q401	Ryanodine receptor 2	Ryr2
451	IDLPIEsVSLS	0.059	-0.299	-1.25	-0.497	-	E9Q401	Ryanodine receptor 2	Ryr2
453	LPIESVsLSLQ	0.318	0.147	-0.417	0.016	-	E9Q401	Ryanodine receptor 2	Ryr2
455	IESVSLsLQDL	0.489	0.267	0.03	0.262	-	E9Q401	Ryanodine receptor 2	Ryr2
509	DRLHVYsSAAH	0.181	0.08	-0.853	-0.197	-	E9Q401	Ryanodine receptor 2	Ryr2
510	RLHVYSsAAHF	0.069	-0.121	-1.31	-0.454	-	E9Q401	Ryanodine receptor 2	Ryr2
525	GREAGEsWKSI	0.145	0.137	-0.836	-0.185	-	E9Q401	Ryanodine receptor 2	Ryr2
528	AGESWKsILNS	0.134	-0.12	-0.942	-0.309	-	E9Q401	Ryanodine receptor 2	Ryr2
532	WKSILNsLYEL	0.496	0.167	-0.176	0.162	-	E9Q401	Ryanodine receptor 2	Ryr2
552	KNCAQFsGSLD	0.079	-0.226	-1.213	-0.453	-	E9Q401	Ryanodine receptor 2	Ryr2
554	CAQFSGsLDWL	0.627	0.374	0.31	0.437	-	E9Q401	Ryanodine receptor 2	Ryr2
560	SLDWLIsRLER	0.156	-0.192	-1.161	-0.399	-	E9Q401	Ryanodine receptor 2	Ryr2
568	LERLEAsSGIL	0.47	0.222	-0.542	0.05	-	E9Q401	Ryanodine receptor 2	Ryr2
569	ERLEASsGILE	0.08	0.077	-0.908	-0.25	-	E9Q401	Ryanodine receptor 2	Ryr2
582	HCVLVEsPEAL	0.111	-0.174	-1.269	-0.444	-	E9Q401	Ryanodine receptor 2	Ryr2
596	KEGHIKsIISL	0.06	-0.129	-0.897	-0.322	-	E9Q401	Ryanodine receptor 2	Ryr2
599	HIKSIIsLLDK	0.472	0.161	0.077	0.236	-	E9Q401	Ryanodine receptor 2	Ryr2
616	VLDVLCsLCVC	0.186	-0.109	-1.211	-0.378	-	E9Q401	Ryanodine receptor 2	Ryr2
627	HGVAVRsNQHL	0.099	-0.1	-1.077	-0.359	-	E9Q401	Ryanodine receptor 2	Ryr2
646	RDLLLQtRLVN	0.071	-0.193	-1.538	-0.553	-	E9Q401	Ryanodine receptor 2	Ryr2
653	RLVNHVsSMRP	0.326	-0.019	-0.729	-0.141	-	E9Q401	Ryanodine receptor 2	Ryr2
654	LVNHVSsMRPN	0.075	-0.148	-1.324	-0.466	-	E9Q401	Ryanodine receptor 2	Ryr2
664	NIFLGVsEGSA	0.256	0.059	-0.602	-0.096	-	E9Q401	Ryanodine receptor 2	Ryr2
667	LGVSEGsAQYK	0.081	-0.281	-1.467	-0.556	-	E9Q401	Ryanodine receptor 2	Ryr2
682	ELMVDHtEPFV	0.531	0.656	-0.12	0.356	-	E9Q401	Ryanodine receptor 2	Ryr2
687	HTEPFVtAEAT	0.27	-0.03	-0.656	-0.139	-	E9Q401	Ryanodine receptor 2	Ryr2
691	FVTAEAtHLRV	0.219	-0.074	-1.222	-0.359	-	E9Q401	Ryanodine receptor 2	Ryr2
699	LRVGWAsTEGY	0.282	0.218	-0.503	-0.001	-	E9Q401	Ryanodine receptor 2	Ryr2
700	RVGWAStEGYS	0.219	0.033	-0.734	-0.16	-	E9Q401	Ryanodine receptor 2	Ryr2
704	ASTEGYsPYPG	0.035	-0.476	-1.559	-0.667	-	E9Q401	Ryanodine receptor 2	Ryr2
724	VGDDLFsYGFD	0.114	-0.169	-1.076	-0.377	-	E9Q401	Ryanodine receptor 2	Ryr2
734	DGLHLWsGCIA	0.134	-0.355	-1.173	-0.465	-	E9Q401	Ryanodine receptor 2	Ryr2
740	SGCIARtVSSP	0.045	-0.195	-1.654	-0.601	-	E9Q401	Ryanodine receptor 2	Ryr2
742	CIARTVsSPNQ	0.904	1.45	1.187	1.181	-	E9Q401	Ryanodine receptor 2	Ryr2
743	IARTVSsPNQH	0.139	-0.345	-1.171	-0.459	-	E9Q401	Ryanodine receptor 2	Ryr2
751	NQHLLRtDDVI	0.135	0.008	-1.066	-0.308	-	E9Q401	Ryanodine receptor 2	Ryr2
756	RTDDVIsCCLD	0.285	-0.024	-0.995	-0.245	-	E9Q401	Ryanodine receptor 2	Ryr2
762	SCCLDLsAPSI	0.371	0.425	-0.634	0.054	-	E9Q401	Ryanodine receptor 2	Ryr2
765	LDLSAPsISFR	0.052	-0.361	-1.307	-0.538	-	E9Q401	Ryanodine receptor 2	Ryr2
767	LSAPSIsFRIN	0.486	0.089	0.008	0.194	-	E9Q401	Ryanodine receptor 2	Ryr2
793	LFFPVVsFSAG	0.388	0.038	-0.225	0.067	-	E9Q401	Ryanodine receptor 2	Ryr2
795	FPVVSFsAGIK	0.409	0.276	-0.354	0.111	-	E9Q401	Ryanodine receptor 2	Ryr2
837	KLKVEHsREYK	0.225	-0.053	-1.015	-0.281	-	E9Q401	Ryanodine receptor 2	Ryr2
845	EYKQERtYTRD	0.256	-0.129	-0.92	-0.265	-	E9Q401	Ryanodine receptor 2	Ryr2
847	KQERTYtRDLL	0.492	0.9	0.409	0.6	-	E9Q401	Ryanodine receptor 2	Ryr2
854	RDLLGPtVSLT	0.05	-0.305	-1.472	-0.576	-	E9Q401	Ryanodine receptor 2	Ryr2
856	LLGPTVsLTQA	0.442	0.052	-0.093	0.134	-	E9Q401	Ryanodine receptor 2	Ryr2
858	GPTVSLtQAAF	0.138	0.058	-0.864	-0.223	-	E9Q401	Ryanodine receptor 2	Ryr2
863	LTQAAFtPVPV	0.134	-0.272	-1.203	-0.447	-	E9Q401	Ryanodine receptor 2	Ryr2
869	TPVPVDtSQIV	0.105	-0.284	-1.592	-0.59	-	E9Q401	Ryanodine receptor 2	Ryr2
870	PVPVDTsQIVL	0.055	-0.121	-1.319	-0.462	-	E9Q401	Ryanodine receptor 2	Ryr2
936	NYNLQMsLETL	0.352	0.222	-0.479	0.032	-	E9Q401	Ryanodine receptor 2	Ryr2
939	LQMSLEtLKTL	0.121	-0.088	-0.815	-0.26	-	E9Q401	Ryanodine receptor 2	Ryr2
942	SLETLKtLLAL	0.386	0.163	-0.232	0.105	-	E9Q401	Ryanodine receptor 2	Ryr2
973	PKNYQLtSGYK	0.194	-0.049	-0.903	-0.253	-	E9Q401	Ryanodine receptor 2	Ryr2
974	KNYQLTsGYKP	0.042	-0.34	-1.389	-0.562	-	E9Q401	Ryanodine receptor 2	Ryr2
984	PAPMDLsFIKL	0.085	-0.163	-1.039	-0.372	-	E9Q401	Ryanodine receptor 2	Ryr2
989	LSFIKLtPSQE	0.025	-0.594	-1.856	-0.808	-	E9Q401	Ryanodine receptor 2	Ryr2
991	FIKLTPsQEAM	0.211	0.12	-0.702	-0.124	-	E9Q401	Ryanodine receptor 2	Ryr2
1017	RIRQGWtYGIQ	0.475	0.183	-0.312	0.116	-	E9Q401	Ryanodine receptor 2	Ryr2
1036	PRLVPYtLLDD	0.404	0.337	0.057	0.266	-	E9Q401	Ryanodine receptor 2	Ryr2
1042	TLLDDRtKKSN	0.103	-0.074	-1.14	-0.37	-	E9Q401	Ryanodine receptor 2	Ryr2
1045	DDRTKKsNKDS	0.308	0.067	-0.718	-0.114	-	E9Q401	Ryanodine receptor 2	Ryr2
1049	KKSNKDsLREA	0.331	-0.13	-0.455	-0.085	-	E9Q401	Ryanodine receptor 2	Ryr2
1056	LREAVRtLLGY	0.331	0.172	-0.505	-0.001	-	E9Q401	Ryanodine receptor 2	Ryr2
1073	PDQDHAsRAEV	0.239	-0.073	-1.238	-0.357	-	E9Q401	Ryanodine receptor 2	Ryr2
1079	SRAEVCsGTGE	0.166	-0.036	-1.133	-0.334	-	E9Q401	Ryanodine receptor 2	Ryr2
1081	AEVCSGtGERF	0.138	-0.131	-1.252	-0.415	-	E9Q401	Ryanodine receptor 2	Ryr2
1093	IFRAEKtYAVK	0.428	0.1	-0.227	0.1	-	E9Q401	Ryanodine receptor 2	Ryr2
1109	FEFEAVtAGDM	0.551	0.237	-0.293	0.165	-	E9Q401	Ryanodine receptor 2	Ryr2
1118	DMRVGWsRPGC	0.425	0.466	-0.504	0.129	-	E9Q401	Ryanodine receptor 2	Ryr2
1130	PDLELGsDDRA	0.071	-0.284	-1.508	-0.574	-	E9Q401	Ryanodine receptor 2	Ryr2
1155	NEHYGRsWQAG	0.094	0.027	-1.063	-0.314	-	E9Q401	Ryanodine receptor 2	Ryr2
1172	VDMNEHtMMFT	0.068	-0.061	-1.289	-0.427	-	E9Q401	Ryanodine receptor 2	Ryr2
1176	EHTMMFtLNGE	0.316	-0.065	-0.366	-0.039	-	E9Q401	Ryanodine receptor 2	Ryr2
1186	EILLDDsGSEL	0.094	-0.153	-1.208	-0.422	-	E9Q401	Ryanodine receptor 2	Ryr2
1188	LLDDSGsELAF	0.296	0.265	-0.391	0.057	-	E9Q401	Ryanodine receptor 2	Ryr2
1206	GFIPVCsLGVA	0.617	0.168	-0.127	0.219	-	E9Q401	Ryanodine receptor 2	Ryr2
1222	NFGKDVsTLKY	0.297	-0.039	-0.728	-0.157	-	E9Q401	Ryanodine receptor 2	Ryr2
1223	FGKDVStLKYF	0.241	0.013	-0.586	-0.111	-	E9Q401	Ryanodine receptor 2	Ryr2
1228	STLKYFtICGL	0.198	-0.146	-0.795	-0.248	-	E9Q401	Ryanodine receptor 2	Ryr2
1243	EPFAVNtNRDI	0.368	-0.043	-0.678	-0.118	-	E9Q401	Ryanodine receptor 2	Ryr2
1248	NTNRDItMWLS	0.657	0.912	0.015	0.528	-	E9Q401	Ryanodine receptor 2	Ryr2
1252	DITMWLsKRLP	0.176	-0.121	-0.805	-0.25	-	E9Q401	Ryanodine receptor 2	Ryr2
1263	QFLQVPsNHEH	0.195	-0.214	-0.998	-0.339	-	E9Q401	Ryanodine receptor 2	Ryr2
1271	HEHIEVtRIDG	0.183	-0.08	-0.974	-0.29	-	E9Q401	Ryanodine receptor 2	Ryr2
1276	VTRIDGtIDSS	0.111	-0.032	-1.11	-0.344	-	E9Q401	Ryanodine receptor 2	Ryr2
1279	IDGTIDsSPCL	0.279	0.286	-0.49	0.025	-	E9Q401	Ryanodine receptor 2	Ryr2
1280	DGTIDSsPCLK	0.04	-0.576	-1.702	-0.746	-	E9Q401	Ryanodine receptor 2	Ryr2
1286	SPCLKVtQKSF	0.052	-0.323	-1.775	-0.682	-	E9Q401	Ryanodine receptor 2	Ryr2
1289	LKVTQKsFGSQ	0.302	0.09	-0.426	-0.012	-	E9Q401	Ryanodine receptor 2	Ryr2
1292	TQKSFGsQNNN	0.111	-0.174	-1.331	-0.465	-	E9Q401	Ryanodine receptor 2	Ryr2
1297	GSQNNNtDIMF	0.232	-0.007	-0.678	-0.151	-	E9Q401	Ryanodine receptor 2	Ryr2
1305	IMFYRLsMPIE	0.665	0.787	0.237	0.563	-	E9Q401	Ryanodine receptor 2	Ryr2
1315	ECAEVFsKSVA	0.109	-0.055	-0.979	-0.308	-	E9Q401	Ryanodine receptor 2	Ryr2
1317	AEVFSKsVAGG	0.41	0.133	-0.27	0.091	-	E9Q401	Ryanodine receptor 2	Ryr2
1341	EDFDVDsDFEV	0.161	-0.138	-1.438	-0.472	-	E9Q401	Ryanodine receptor 2	Ryr2
1349	FEVLMKtAHGH	0.238	-0.079	-0.96	-0.267	-	E9Q401	Ryanodine receptor 2	Ryr2
1365	IDKDKEtPKPE	0.037	-0.602	-1.702	-0.756	-	E9Q401	Ryanodine receptor 2	Ryr2
1382	YAQEKPsRLKQ	0.041	-0.355	-1.871	-0.728	-	E9Q401	Ryanodine receptor 2	Ryr2
1393	RFLLRRtKPDY	0.856	0.761	0.561	0.726	-	E9Q401	Ryanodine receptor 2	Ryr2
1398	RTKPDYsTGHS	0.2	-0.05	-0.622	-0.157	-	E9Q401	Ryanodine receptor 2	Ryr2
1399	TKPDYStGHSA	0.094	-0.201	-1.207	-0.438	-	E9Q401	Ryanodine receptor 2	Ryr2
1402	DYSTGHsARLT	0.233	-0.046	-0.995	-0.269	-	E9Q401	Ryanodine receptor 2	Ryr2
1406	GHSARLtEDVL	0.352	0.227	-0.611	-0.011	-	E9Q401	Ryanodine receptor 2	Ryr2
1423	YEYLMQtSTYY	0.157	-0.156	-1.155	-0.385	-	E9Q401	Ryanodine receptor 2	Ryr2
1424	EYLMQTsTYYY	0.162	-0.07	-0.992	-0.3	-	E9Q401	Ryanodine receptor 2	Ryr2
1425	YLMQTStYYYS	0.083	-0.027	-0.985	-0.309	-	E9Q401	Ryanodine receptor 2	Ryr2
1429	TSTYYYsVRIF	0.207	-0.061	-0.443	-0.099	-	E9Q401	Ryanodine receptor 2	Ryr2
1447	VWVGWItSDFH	0.092	-0.197	-1.219	-0.441	-	E9Q401	Ryanodine receptor 2	Ryr2
1448	WVGWITsDFHQ	0.118	-0.171	-0.712	-0.255	-	E9Q401	Ryanodine receptor 2	Ryr2
1455	DFHQYDtGFDL	0.31	-0.061	-0.593	-0.115	-	E9Q401	Ryanodine receptor 2	Ryr2
1464	DLDRVRtVTVT	0.685	0.855	0.055	0.532	-	E9Q401	Ryanodine receptor 2	Ryr2
1466	DRVRTVtVTLG	0.819	1.118	0.537	0.825	-	E9Q401	Ryanodine receptor 2	Ryr2
1468	VRTVTVtLGDE	0.535	0.345	0.09	0.323	-	E9Q401	Ryanodine receptor 2	Ryr2
1479	KGKVHEsIKRS	0.095	-0.244	-1.292	-0.481	-	E9Q401	Ryanodine receptor 2	Ryr2
1483	HESIKRsNCYM	0.043	-0.277	-1.808	-0.68	-	E9Q401	Ryanodine receptor 2	Ryr2
1493	MVCAGEsMSPG	0.089	-0.099	-1.383	-0.464	-	E9Q401	Ryanodine receptor 2	Ryr2
1495	CAGESMsPGQG	0.249	0.001	-0.478	-0.076	-	E9Q401	Ryanodine receptor 2	Ryr2
1503	GQGRNNsNGLE	0.712	0.882	0.336	0.643	-	E9Q401	Ryanodine receptor 2	Ryr2
1516	CVVDAAsGLLT	0.18	0.006	-0.84	-0.218	-	E9Q401	Ryanodine receptor 2	Ryr2
1520	AASGLLtFIAN	0.106	-0.085	-0.934	-0.304	-	E9Q401	Ryanodine receptor 2	Ryr2
1529	ANGKELsTYYQ	0.077	-0.307	-1.562	-0.597	-	E9Q401	Ryanodine receptor 2	Ryr2
1530	NGKELStYYQV	0.067	-0.219	-1.404	-0.519	-	E9Q401	Ryanodine receptor 2	Ryr2
1537	YYQVEPsTKLF	0.1	-0.105	-1.139	-0.381	-	E9Q401	Ryanodine receptor 2	Ryr2
1538	YQVEPStKLFP	0.022	-0.404	-1.727	-0.703	-	E9Q401	Ryanodine receptor 2	Ryr2
1549	AVFAQAtSPNV	0.439	0.439	-0.708	0.056	-	E9Q401	Ryanodine receptor 2	Ryr2
1550	VFAQATsPNVF	0.175	-0.22	-0.479	-0.175	-	E9Q401	Ryanodine receptor 2	Ryr2
1568	KNVMPLsAGLF	0.07	-0.25	-1.191	-0.457	-	E9Q401	Ryanodine receptor 2	Ryr2
1574	SAGLFKsEHKN	0.144	-0.036	-1.158	-0.35	-	E9Q401	Ryanodine receptor 2	Ryr2
1593	LHVQFLsHVLW	0.102	-0.08	-1.29	-0.423	-	E9Q401	Ryanodine receptor 2	Ryr2
1598	LSHVLWsRMPN	0.05	-0.38	-1.716	-0.682	-	E9Q401	Ryanodine receptor 2	Ryr2
1610	FLKVDVsRISE	0.191	-0.05	-0.751	-0.203	-	E9Q401	Ryanodine receptor 2	Ryr2
1613	VDVSRIsERQG	0.258	-0.078	-0.651	-0.157	-	E9Q401	Ryanodine receptor 2	Ryr2
1630	DPLQFMsLHIP	0.507	0.081	-0.366	0.074	-	E9Q401	Ryanodine receptor 2	Ryr2
1639	IPEENRsVDIL	0.196	-0.043	-0.765	-0.204	-	E9Q401	Ryanodine receptor 2	Ryr2
1646	VDILELtEQEE	0.092	-0.158	-1.335	-0.467	-	E9Q401	Ryanodine receptor 2	Ryr2
1658	LQFHYHtLRLY	0.501	0.172	-0.044	0.21	-	E9Q401	Ryanodine receptor 2	Ryr2
1663	HTLRLYsAVCA	0.557	0.976	0.265	0.599	-	E9Q401	Ryanodine receptor 2	Ryr2
1679	VAHALCsHVDE	0.171	-0.193	-1.244	-0.422	-	E9Q401	Ryanodine receptor 2	Ryr2
1713	LIDIHLsSYAT	0.109	0.01	-0.92	-0.267	-	E9Q401	Ryanodine receptor 2	Ryr2
1714	IDIHLSsYATA	0.038	-0.409	-1.559	-0.643	-	E9Q401	Ryanodine receptor 2	Ryr2
1717	HLSSYAtARLM	0.355	0.066	-0.477	-0.019	-	E9Q401	Ryanodine receptor 2	Ryr2
1731	EFIVPMtEETK	0.143	0.016	-0.696	-0.179	-	E9Q401	Ryanodine receptor 2	Ryr2
1734	VPMTEEtKSIT	0.068	-0.313	-1.577	-0.608	-	E9Q401	Ryanodine receptor 2	Ryr2
1736	MTEETKsITLF	0.169	0.016	-0.702	-0.172	-	E9Q401	Ryanodine receptor 2	Ryr2
1738	EETKSItLFPD	0.693	0.289	0.438	0.473	-	E9Q401	Ryanodine receptor 2	Ryr2
1755	LPGIGLsTSLR	0.027	-0.268	-1.645	-0.629	-	E9Q401	Ryanodine receptor 2	Ryr2
1756	PGIGLStSLRP	0.035	-0.341	-1.794	-0.7	-	E9Q401	Ryanodine receptor 2	Ryr2
1757	GIGLSTsLRPR	0.554	0.274	0.107	0.311	-	E9Q401	Ryanodine receptor 2	Ryr2
1765	RPRMRFsSPSF	0.722	0.756	0.325	0.601	-	E9Q401	Ryanodine receptor 2	Ryr2
1766	PRMRFSsPSFV	0.191	0.612	-0.764	0.013	-	E9Q401	Ryanodine receptor 2	Ryr2
1768	MRFSSPsFVSI	0.488	0.477	0.075	0.347	-	E9Q401	Ryanodine receptor 2	Ryr2
1771	SSPSFVsISND	0.078	-0.331	-1.571	-0.608	-	E9Q401	Ryanodine receptor 2	Ryr2
1773	PSFVSIsNDCY	0.417	0.217	-0.439	0.065	-	E9Q401	Ryanodine receptor 2	Ryr2
1780	NDCYQYsPEFP	0.027	-0.459	-1.733	-0.721	-	E9Q401	Ryanodine receptor 2	Ryr2
1792	DILKAKtIQML	0.589	0.177	0.016	0.261	-	E9Q401	Ryanodine receptor 2	Ryr2
1797	KTIQMLtEAVK	0.134	-0.165	-1.037	-0.356	-	E9Q401	Ryanodine receptor 2	Ryr2
1804	EAVKEGsLHAR	0.371	0.034	-0.474	-0.023	-	E9Q401	Ryanodine receptor 2	Ryr2
1814	RDPVGGtTEFL	0.019	-0.39	-2.037	-0.803	-	E9Q401	Ryanodine receptor 2	Ryr2
1815	DPVGGTtEFLF	0.103	-0.081	-1.033	-0.337	-	E9Q401	Ryanodine receptor 2	Ryr2
1828	LIKLFYtLLIM	0.392	0.181	-0.199	0.125	-	E9Q401	Ryanodine receptor 2	Ryr2
1850	LQLIEPsVFKE	0.086	-0.193	-1.051	-0.386	-	E9Q401	Ryanodine receptor 2	Ryr2
1864	PEEEGGtPEKE	0.021	-0.597	-2.147	-0.908	-	E9Q401	Ryanodine receptor 2	Ryr2
1870	TPEKEIsIEDA	0.28	-0.126	-0.667	-0.171	-	E9Q401	Ryanodine receptor 2	Ryr2
1928	EAIVAFsDDFV	0.161	0.02	-1.108	-0.309	-	E9Q401	Ryanodine receptor 2	Ryr2
1953	MQALNMsAALT	0.245	0.113	-0.478	-0.04	-	E9Q401	Ryanodine receptor 2	Ryr2
1957	NMSAALtARKT	0.117	-0.061	-1.095	-0.346	-	E9Q401	Ryanodine receptor 2	Ryr2
1961	ALTARKtREFR	0.398	0.057	-0.33	0.042	-	E9Q401	Ryanodine receptor 2	Ryr2
1966	KTREFRsPPQE	0.359	0.242	-0.722	-0.04	-	E9Q401	Ryanodine receptor 2	Ryr2
1983	NFKDDKsECPC	0.233	-0.085	-0.693	-0.181	-	E9Q401	Ryanodine receptor 2	Ryr2
2004	FHEDLMtHCGI	0.286	0.043	-0.824	-0.165	-	E9Q401	Ryanodine receptor 2	Ryr2
2015	ELDEDGsLDGS	0.166	-0.062	-0.771	-0.222	-	E9Q401	Ryanodine receptor 2	Ryr2
2019	DGSLDGsNDLT	0.108	-0.257	-1.367	-0.505	-	E9Q401	Ryanodine receptor 2	Ryr2
2023	DGSNDLtIRGR	0.09	-0.33	-0.973	-0.404	-	E9Q401	Ryanodine receptor 2	Ryr2
2030	IRGRLLsLVEK	0.641	1.016	0.453	0.703	-	E9Q401	Ryanodine receptor 2	Ryr2
2036	SLVEKVtYLKK	0.07	-0.224	-1.497	-0.55	-	E9Q401	Ryanodine receptor 2	Ryr2
2049	AEKPVAsDSRK	0.209	-0.238	-1.285	-0.438	-	E9Q401	Ryanodine receptor 2	Ryr2
2051	KPVASDsRKCS	0.135	-0.096	-1.175	-0.379	-	E9Q401	Ryanodine receptor 2	Ryr2
2055	SDSRKCsSLQQ	0.213	0.479	-0.822	-0.043	-	E9Q401	Ryanodine receptor 2	Ryr2
2056	DSRKCSsLQQL	0.783	0.288	0.298	0.456	-	E9Q401	Ryanodine receptor 2	Ryr2
2062	SLQQLIsETMV	0.311	0.017	-0.917	-0.196	-	E9Q401	Ryanodine receptor 2	Ryr2
2064	QQLISEtMVRW	0.167	0.154	-0.828	-0.169	-	E9Q401	Ryanodine receptor 2	Ryr2
2072	VRWAQEsVIED	0.162	0.231	-0.78	-0.129	-	E9Q401	Ryanodine receptor 2	Ryr2
2104	VRALPKtYTIN	0.289	0.083	-0.483	-0.037	-	E9Q401	Ryanodine receptor 2	Ryr2
2106	ALPKTYtINGV	0.273	0.077	-0.5	-0.05	-	E9Q401	Ryanodine receptor 2	Ryr2
2111	YTINGVsVEDT	0.177	-0.076	-0.697	-0.199	-	E9Q401	Ryanodine receptor 2	Ryr2
2115	GVSVEDtINLL	0.106	-0.128	-1.153	-0.392	-	E9Q401	Ryanodine receptor 2	Ryr2
2121	TINLLAsLGQI	0.508	0.164	-0.199	0.158	-	E9Q401	Ryanodine receptor 2	Ryr2
2127	SLGQIRsLLSV	0.115	-0.008	-1.078	-0.324	-	E9Q401	Ryanodine receptor 2	Ryr2
2130	QIRSLLsVRMG	0.186	0.02	-0.863	-0.219	-	E9Q401	Ryanodine receptor 2	Ryr2
2169	ALGMHEtVMEV	0.335	0.005	-0.984	-0.215	-	E9Q401	Ryanodine receptor 2	Ryr2
2183	VLGGGEsKEIT	0.08	-0.192	-1.171	-0.427	-	E9Q401	Ryanodine receptor 2	Ryr2
2187	GESKEItFPKM	0.763	0.498	0.169	0.476	-	E9Q401	Ryanodine receptor 2	Ryr2
2206	CYFCRIsRQNQ	0.533	0.13	-0.514	0.05	-	E9Q401	Ryanodine receptor 2	Ryr2
2218	AMFDHLsYLLE	0.069	-0.036	-1.484	-0.484	-	E9Q401	Ryanodine receptor 2	Ryr2
2224	SYLLENsSVGL	0.163	-0.086	-1.169	-0.364	-	E9Q401	Ryanodine receptor 2	Ryr2
2225	YLLENSsVGLA	0.215	0.033	-0.458	-0.07	-	E9Q401	Ryanodine receptor 2	Ryr2
2230	SSVGLAsPAMR	0.036	-0.579	-1.935	-0.826	-	E9Q401	Ryanodine receptor 2	Ryr2
2236	SPAMRGsTPLD	0.509	0.414	-0.156	0.255	-	E9Q401	Ryanodine receptor 2	Ryr2
2237	PAMRGStPLDV	0.201	0.462	-0.712	-0.016	-	E9Q401	Ryanodine receptor 2	Ryr2
2245	LDVAAAsVMDN	0.318	0.041	-0.569	-0.07	-	E9Q401	Ryanodine receptor 2	Ryr2
2275	AGCGLQsCQML	0.143	-0.049	-0.976	-0.294	-	E9Q401	Ryanodine receptor 2	Ryr2
2281	SCQMLVsKGYP	0.231	-0.13	-1.041	-0.314	-	E9Q401	Ryanodine receptor 2	Ryr2
2311	VFCNGEsVEEN	0.115	-0.117	-1.034	-0.345	-	E9Q401	Ryanodine receptor 2	Ryr2
2357	KIAEDPsRDGP	0.091	-0.274	-1.213	-0.466	-	E9Q401	Ryanodine receptor 2	Ryr2
2362	PSRDGPsPTSG	0.096	-0.297	-1.327	-0.509	-	E9Q401	Ryanodine receptor 2	Ryr2
2364	RDGPSPtSGSS	0.089	-0.074	-1.048	-0.344	-	E9Q401	Ryanodine receptor 2	Ryr2
2365	DGPSPTsGSSK	0.034	-0.486	-1.643	-0.698	-	E9Q401	Ryanodine receptor 2	Ryr2
2367	PSPTSGsSKTL	0.131	-0.066	-0.937	-0.29	-	E9Q401	Ryanodine receptor 2	Ryr2
2368	SPTSGSsKTLD	0.066	-0.307	-1.391	-0.544	-	E9Q401	Ryanodine receptor 2	Ryr2
2370	TSGSSKtLDIE	0.535	0.17	0.106	0.27	-	E9Q401	Ryanodine receptor 2	Ryr2
2380	EEEEDDtIHMG	0.064	-0.318	-1.559	-0.604	-	E9Q401	Ryanodine receptor 2	Ryr2
2389	MGNAIMtFYAA	0.482	0.25	0.127	0.286	-	E9Q401	Ryanodine receptor 2	Ryr2
2420	EAIRIRsILRS	0.21	0.613	-0.552	0.091	-	E9Q401	Ryanodine receptor 2	Ryr2
2424	IRSILRsLIPL	0.192	0.184	-0.577	-0.067	-	E9Q401	Ryanodine receptor 2	Ryr2
2436	DLVGVIsIAFQ	0.126	-0.19	-1.161	-0.408	-	E9Q401	Ryanodine receptor 2	Ryr2
2443	IAFQMPtIAKD	0.165	-0.289	-0.817	-0.314	-	E9Q401	Ryanodine receptor 2	Ryr2
2456	VVEPDMsAGFC	0.139	-0.104	-1.102	-0.356	-	E9Q401	Ryanodine receptor 2	Ryr2
2500	DLRAAAsLDTA	0.875	0.469	0.645	0.663	-	E9Q401	Ryanodine receptor 2	Ryr2
2503	AAASLDtAALS	0.062	-0.341	-1.749	-0.676	-	E9Q401	Ryanodine receptor 2	Ryr2
2507	LDTAALsATDM	0.223	-0.06	-0.697	-0.178	-	E9Q401	Ryanodine receptor 2	Ryr2
2509	TAALSAtDMAL	0.495	0.293	-0.136	0.217	-	E9Q401	Ryanodine receptor 2	Ryr2
2521	LNRYLCtAVLP	0.221	0.115	-0.832	-0.165	-	E9Q401	Ryanodine receptor 2	Ryr2
2528	AVLPLLtRCAP	0.04	-0.395	-1.671	-0.676	-	E9Q401	Ryanodine receptor 2	Ryr2
2537	APLFAGtEHHA	0.212	-0.081	-0.798	-0.222	-	E9Q401	Ryanodine receptor 2	Ryr2
2542	GTEHHAsLIDS	0.607	0.166	-0.075	0.233	-	E9Q401	Ryanodine receptor 2	Ryr2
2546	HASLIDsLLHT	0.106	-0.181	-0.881	-0.319	-	E9Q401	Ryanodine receptor 2	Ryr2
2550	IDSLLHtVYRL	0.146	-0.092	-1.07	-0.339	-	E9Q401	Ryanodine receptor 2	Ryr2
2555	HTVYRLsKGCS	0.277	0.207	-0.448	0.012	-	E9Q401	Ryanodine receptor 2	Ryr2
2559	RLSKGCsLTKA	0.63	0.113	-0.207	0.178	-	E9Q401	Ryanodine receptor 2	Ryr2
2561	SKGCSLtKAQR	0.273	0.05	-0.534	-0.07	-	E9Q401	Ryanodine receptor 2	Ryr2
2567	TKAQRDsIEVC	0.291	-0.012	-0.633	-0.118	-	E9Q401	Ryanodine receptor 2	Ryr2
2574	IEVCLLsICGQ	0.058	-0.401	-1.615	-0.653	-	E9Q401	Ryanodine receptor 2	Ryr2
2582	CGQLRPsMMQH	0.309	0.095	-0.671	-0.089	-	E9Q401	Ryanodine receptor 2	Ryr2
2610	MPLKLLtNHYE	0.169	-0.124	-1.214	-0.39	-	E9Q401	Ryanodine receptor 2	Ryr2
2633	GNFGAAsEEEL	0.403	0.175	-0.361	0.073	-	E9Q401	Ryanodine receptor 2	Ryr2
2640	EEELHLsRKLF	0.068	-0.201	-1.365	-0.499	-	E9Q401	Ryanodine receptor 2	Ryr2
2652	GIFDALsQKKY	0.247	0.074	-1.028	-0.236	-	E9Q401	Ryanodine receptor 2	Ryr2
2669	LALPCLsAVAG	0.176	-0.05	-0.772	-0.216	-	E9Q401	Ryanodine receptor 2	Ryr2
2682	PPDYMEsNYVS	0.108	-0.19	-1.351	-0.478	-	E9Q401	Ryanodine receptor 2	Ryr2
2686	MESNYVsMMEK	0.383	0.092	-0.548	-0.024	-	E9Q401	Ryanodine receptor 2	Ryr2
2692	SMMEKQsSMDS	0.054	-0.017	-1.476	-0.48	-	E9Q401	Ryanodine receptor 2	Ryr2
2693	MMEKQSsMDSE	0.136	0.173	-0.983	-0.225	-	E9Q401	Ryanodine receptor 2	Ryr2
2696	KQSSMDsEGNF	0.14	-0.174	-1.065	-0.366	-	E9Q401	Ryanodine receptor 2	Ryr2
2707	NPQPVDtSNIT	0.14	-0.226	-1.152	-0.413	-	E9Q401	Ryanodine receptor 2	Ryr2
2708	PQPVDTsNITI	0.084	-0.169	-1.013	-0.366	-	E9Q401	Ryanodine receptor 2	Ryr2
2711	VDTSNItIPEK	0.408	0.205	-0.138	0.158	-	E9Q401	Ryanodine receptor 2	Ryr2
2727	NKYAEHsHDKW	0.391	0.137	-0.469	0.02	-	E9Q401	Ryanodine receptor 2	Ryr2
2732	HSHDKWsMDKL	0.106	-0.001	-1.138	-0.345	-	E9Q401	Ryanodine receptor 2	Ryr2
2747	IYGEIYsDSSK	0.08	-0.086	-1.049	-0.352	-	E9Q401	Ryanodine receptor 2	Ryr2
2749	GEIYSDsSKIQ	0.286	0.065	-0.785	-0.145	-	E9Q401	Ryanodine receptor 2	Ryr2
2750	EIYSDSsKIQP	0.048	-0.244	-1.184	-0.46	-	E9Q401	Ryanodine receptor 2	Ryr2
2763	KPYKLLsEKEK	0.129	-0.124	-1.048	-0.347	-	E9Q401	Ryanodine receptor 2	Ryr2
2777	RWPIKEsLKTM	0.14	-0.072	-0.942	-0.291	-	E9Q401	Ryanodine receptor 2	Ryr2
2780	IKESLKtMLAW	0.318	0.141	-0.397	0.021	-	E9Q401	Ryanodine receptor 2	Ryr2
2791	GWRIERtREGD	0.313	0.135	-0.809	-0.12	-	E9Q401	Ryanodine receptor 2	Ryr2
2796	RTREGDsMALY	0.216	0.16	-1.12	-0.248	-	E9Q401	Ryanodine receptor 2	Ryr2
2803	MALYNRtRRIS	0.192	-0.158	-0.939	-0.302	-	E9Q401	Ryanodine receptor 2	Ryr2
2807	NRTRRIsQTSQ	0.739	1.066	0.326	0.71	-	E9Q401	Ryanodine receptor 2	Ryr2
2809	TRRISQtSQVS	0.514	0.631	0.022	0.389	-	E9Q401	Ryanodine receptor 2	Ryr2
2810	RRISQTsQVSI	0.114	0.137	-1.148	-0.299	-	E9Q401	Ryanodine receptor 2	Ryr2
2813	SQTSQVsIDAA	0.146	-0.125	-0.703	-0.227	-	E9Q401	Ryanodine receptor 2	Ryr2
2821	DAAHGYsPRAI	0.121	-0.33	-0.81	-0.34	-	E9Q401	Ryanodine receptor 2	Ryr2
2828	PRAIDMsNVTL	0.264	0.294	-0.54	0.006	-	E9Q401	Ryanodine receptor 2	Ryr2
2831	IDMSNVtLSRD	0.332	-0.16	-0.487	-0.105	-	E9Q401	Ryanodine receptor 2	Ryr2
2833	MSNVTLsRDLH	0.053	-0.222	-1.611	-0.593	-	E9Q401	Ryanodine receptor 2	Ryr2
2861	KKLELEsKGGG	0.206	-0.11	-0.828	-0.244	-	E9Q401	Ryanodine receptor 2	Ryr2
2875	LLVPYDtLTAK	0.476	0.036	-0.223	0.096	-	E9Q401	Ryanodine receptor 2	Ryr2
2877	VPYDTLtAKEK	0.066	-0.137	-1.382	-0.484	-	E9Q401	Ryanodine receptor 2	Ryr2
2898	FKFLQIsGYVV	0.265	0.109	-0.896	-0.174	-	E9Q401	Ryanodine receptor 2	Ryr2
2903	ISGYVVsRGFK	0.226	-0.248	-0.799	-0.274	-	E9Q401	Ryanodine receptor 2	Ryr2
2913	KDLDLDtPSIE	0.025	-0.686	-2.219	-0.96	-	E9Q401	Ryanodine receptor 2	Ryr2
2915	LDLDTPsIEKR	0.049	-0.238	-1.328	-0.506	-	E9Q401	Ryanodine receptor 2	Ryr2
2923	EKRFAYsFLQQ	0.671	0.436	0.289	0.465	-	E9Q401	Ryanodine receptor 2	Ryr2
2946	LEFDGGsRSKG	0.04	-0.367	-1.941	-0.756	-	E9Q401	Ryanodine receptor 2	Ryr2
2948	FDGGSRsKGEH	0.164	0.073	-0.807	-0.19	-	E9Q401	Ryanodine receptor 2	Ryr2
2983	HRLYFLsAASR	0.098	0.161	-0.922	-0.221	-	E9Q401	Ryanodine receptor 2	Ryr2
2986	YFLSAAsRPLC	0.593	0.405	-0.06	0.312	-	E9Q401	Ryanodine receptor 2	Ryr2
2991	ASRPLCtGGHA	0.259	-0.059	-0.725	-0.175	-	E9Q401	Ryanodine receptor 2	Ryr2
2996	CTGGHAsNKEK	0.27	-0.053	-0.837	-0.207	-	E9Q401	Ryanodine receptor 2	Ryr2
3004	KEKEMVtSLFC	0.076	-0.35	-1.634	-0.636	-	E9Q401	Ryanodine receptor 2	Ryr2
3005	EKEMVTsLFCK	0.493	0.074	-0.047	0.173	-	E9Q401	Ryanodine receptor 2	Ryr2
3019	LVRHRIsLFGN	0.709	0.424	0.469	0.534	-	E9Q401	Ryanodine receptor 2	Ryr2
3026	LFGNDAtSIVN	0.096	-0.046	-0.841	-0.264	-	E9Q401	Ryanodine receptor 2	Ryr2
3027	FGNDATsIVNC	0.168	0.017	-1.099	-0.305	-	E9Q401	Ryanodine receptor 2	Ryr2
3038	LHILGQtLDAR	0.26	0.132	-0.492	-0.033	-	E9Q401	Ryanodine receptor 2	Ryr2
3043	QTLDARtVMKT	0.155	-0.069	-1.103	-0.339	-	E9Q401	Ryanodine receptor 2	Ryr2
3047	ARTVMKtGLDS	0.197	0.091	-0.63	-0.114	-	E9Q401	Ryanodine receptor 2	Ryr2
3051	MKTGLDsVKSA	0.156	-0.074	-0.808	-0.242	-	E9Q401	Ryanodine receptor 2	Ryr2
3054	GLDSVKsALRA	0.339	-0.019	-0.8	-0.16	-	E9Q401	Ryanodine receptor 2	Ryr2
3070	AEDLEKtMENL	0.183	0.068	-1.222	-0.324	-	E9Q401	Ryanodine receptor 2	Ryr2
3080	LKQGQFtHTRS	0.277	0.011	-0.734	-0.149	-	E9Q401	Ryanodine receptor 2	Ryr2
3082	QGQFTHtRSQP	0.107	-0.069	-1.064	-0.342	-	E9Q401	Ryanodine receptor 2	Ryr2
3084	QFTHTRsQPKG	0.301	0.393	-0.456	0.079	-	E9Q401	Ryanodine receptor 2	Ryr2
3090	SQPKGVtQIIN	0.117	-0.216	-1.208	-0.435	-	E9Q401	Ryanodine receptor 2	Ryr2
3096	TQIINYtTVAL	0.151	0.125	-0.473	-0.066	-	E9Q401	Ryanodine receptor 2	Ryr2
3097	QIINYTtVALL	0.158	0.073	-0.63	-0.133	-	E9Q401	Ryanodine receptor 2	Ryr2
3105	ALLPMLsSLFE	0.066	-0.318	-1.402	-0.551	-	E9Q401	Ryanodine receptor 2	Ryr2
3106	LLPMLSsLFEH	0.165	-0.157	-0.905	-0.299	-	E9Q401	Ryanodine receptor 2	Ryr2
3128	LEDVQVsCYRI	0.165	-0.064	-1.112	-0.337	-	E9Q401	Ryanodine receptor 2	Ryr2
3134	SCYRILtSLYA	0.234	0.653	-0.471	0.139	-	E9Q401	Ryanodine receptor 2	Ryr2
3135	CYRILTsLYAL	0.67	0.486	0.363	0.506	-	E9Q401	Ryanodine receptor 2	Ryr2
3141	SLYALGtSKSI	0.056	-0.217	-1.408	-0.523	-	E9Q401	Ryanodine receptor 2	Ryr2
3142	LYALGTsKSIY	0.152	-0.103	-0.859	-0.27	-	E9Q401	Ryanodine receptor 2	Ryr2
3144	ALGTSKsIYVE	0.395	0.22	-0.199	0.139	-	E9Q401	Ryanodine receptor 2	Ryr2
3152	YVERQRsALGE	0.3	0.738	-0.373	0.222	-	E9Q401	Ryanodine receptor 2	Ryr2
3172	PIAFLEtHLDK	0.25	-0.011	-0.808	-0.19	-	E9Q401	Ryanodine receptor 2	Ryr2
3181	DKHNVYsIYNT	0.168	0.011	-0.792	-0.204	-	E9Q401	Ryanodine receptor 2	Ryr2
3185	VYSIYNtRSSR	0.126	-0.167	-1.255	-0.432	-	E9Q401	Ryanodine receptor 2	Ryr2
3187	SIYNTRsSRER	0.063	-0.086	-1.24	-0.421	-	E9Q401	Ryanodine receptor 2	Ryr2
3188	IYNTRSsRERA	0.23	-0.145	-1.062	-0.326	-	E9Q401	Ryanodine receptor 2	Ryr2
3195	RERAALsLPAN	0.898	0.918	0.905	0.907	-	E9Q401	Ryanodine receptor 2	Ryr2
3209	VCPNIPsLEKL	0.15	-0.053	-0.687	-0.197	-	E9Q401	Ryanodine receptor 2	Ryr2
3215	SLEKLMtEIIE	0.416	0.167	-0.376	0.069	-	E9Q401	Ryanodine receptor 2	Ryr2
3223	IIELAEsGIRY	0.298	-0.045	-0.739	-0.162	-	E9Q401	Ryanodine receptor 2	Ryr2
3228	ESGIRYtQMPY	0.174	0.041	-0.919	-0.235	-	E9Q401	Ryanodine receptor 2	Ryr2
3243	VLPMLCsYMSR	0.11	-0.192	-1.297	-0.46	-	E9Q401	Ryanodine receptor 2	Ryr2
3246	MLCSYMsRWWE	0.543	0.191	-0.333	0.133	-	E9Q401	Ryanodine receptor 2	Ryr2
3265	RAEMCCtALNS	0.303	-0.031	-1.135	-0.288	-	E9Q401	Ryanodine receptor 2	Ryr2
3269	CCTALNsEHMN	0.406	0.086	-0.679	-0.062	-	E9Q401	Ryanodine receptor 2	Ryr2
3274	NSEHMNtLLGN	0.327	-0.095	-0.488	-0.085	-	E9Q401	Ryanodine receptor 2	Ryr2
3302	KRLAVFsQPII	0.725	0.658	0.22	0.534	-	E9Q401	Ryanodine receptor 2	Ryr2
3316	KPQLLKtHFLP	0.169	-0.066	-0.929	-0.275	-	E9Q401	Ryanodine receptor 2	Ryr2
3334	KAAMVVsEEDH	0.29	-0.15	-0.793	-0.218	-	E9Q401	Ryanodine receptor 2	Ryr2
3348	EARGDMsEAEL	0.376	0.326	-0.261	0.147	-	E9Q401	Ryanodine receptor 2	Ryr2
3359	LILDEFtTLAR	0.196	0.076	-0.72	-0.149	-	E9Q401	Ryanodine receptor 2	Ryr2
3360	ILDEFTtLARD	0.368	-0.027	-0.534	-0.064	-	E9Q401	Ryanodine receptor 2	Ryr2
3406	EVFIYWsKSHN	0.079	-0.15	-1.083	-0.385	-	E9Q401	Ryanodine receptor 2	Ryr2
3408	FIYWSKsHNFK	0.595	0.297	0.324	0.405	-	E9Q401	Ryanodine receptor 2	Ryr2
3428	NEINNMsFLIT	0.239	0.085	-0.55	-0.075	-	E9Q401	Ryanodine receptor 2	Ryr2
3432	NMSFLItDTKS	0.151	-0.017	-1.225	-0.364	-	E9Q401	Ryanodine receptor 2	Ryr2
3434	SFLITDtKSKM	0.056	-0.224	-1.402	-0.523	-	E9Q401	Ryanodine receptor 2	Ryr2
3436	LITDTKsKMSK	0.158	0.046	-0.601	-0.132	-	E9Q401	Ryanodine receptor 2	Ryr2
3439	DTKSKMsKAAI	0.382	0.056	-0.363	0.025	-	E9Q401	Ryanodine receptor 2	Ryr2
3444	MSKAAIsDQER	0.63	0.145	-0.046	0.243	-	E9Q401	Ryanodine receptor 2	Ryr2
3459	RKGDRYsMQTS	0.453	0.37	-0.3	0.175	-	E9Q401	Ryanodine receptor 2	Ryr2
3462	DRYSMQtSLIV	0.164	-0.003	-1.239	-0.359	-	E9Q401	Ryanodine receptor 2	Ryr2
3463	RYSMQTsLIVA	0.315	0.067	-0.356	0.009	-	E9Q401	Ryanodine receptor 2	Ryr2
3496	LAKNRFsLKDT	0.529	0.223	0.292	0.348	-	E9Q401	Ryanodine receptor 2	Ryr2
3500	RFSLKDtEEEV	0.201	-0.046	-1.14	-0.328	-	E9Q401	Ryanodine receptor 2	Ryr2
3510	VRDIIRsNIHL	0.067	0.054	-1.073	-0.317	-	E9Q401	Ryanodine receptor 2	Ryr2
3537	KDLPNRtEDPS	0.084	-0.204	-1.156	-0.425	-	E9Q401	Ryanodine receptor 2	Ryr2
3541	NRTEDPsDPER	0.594	0.64	0.038	0.424	-	E9Q401	Ryanodine receptor 2	Ryr2
3546	PSDPERtVERV	0.086	-0.288	-1.736	-0.646	-	E9Q401	Ryanodine receptor 2	Ryr2
3564	FHLEQKsKYTG	0.141	0.038	-0.963	-0.262	-	E9Q401	Ryanodine receptor 2	Ryr2
3567	EQKSKYtGRGY	0.116	-0.183	-0.681	-0.25	-	E9Q401	Ryanodine receptor 2	Ryr2
3573	TGRGYFsLVEH	0.447	0.217	-0.169	0.165	-	E9Q401	Ryanodine receptor 2	Ryr2
3581	VEHPQRsKKAV	0.06	-0.18	-1.608	-0.576	-	E9Q401	Ryanodine receptor 2	Ryr2
3591	VWHKLLsKQRK	0.117	-0.23	-1.209	-0.441	-	E9Q401	Ryanodine receptor 2	Ryr2
3626	LQGYEKsWIET	0.122	0.024	-0.534	-0.129	-	E9Q401	Ryanodine receptor 2	Ryr2
3630	EKSWIEtEEHY	0.27	-0.03	-0.475	-0.079	-	E9Q401	Ryanodine receptor 2	Ryr2
3671	QLILLFsRTAL	0.244	0.075	-0.708	-0.13	-	E9Q401	Ryanodine receptor 2	Ryr2
3673	ILLFSRtALTE	0.424	0.233	-0.404	0.084	-	E9Q401	Ryanodine receptor 2	Ryr2
3676	FSRTALtEKCK	0.406	0.296	-0.345	0.119	-	E9Q401	Ryanodine receptor 2	Ryr2
3697	ADIMAKsCHDE	0.422	0.077	-0.438	0.02	-	E9Q401	Ryanodine receptor 2	Ryr2
3712	GEEEVKsFEEK	0.349	0.037	-0.537	-0.05	-	E9Q401	Ryanodine receptor 2	Ryr2
3742	AEMVLQtISAS	0.042	-0.184	-1.507	-0.55	-	E9Q401	Ryanodine receptor 2	Ryr2
3744	MVLQTIsASKG	0.161	0.039	-0.835	-0.212	-	E9Q401	Ryanodine receptor 2	Ryr2
3746	LQTISAsKGET	0.433	0.23	0.095	0.253	-	E9Q401	Ryanodine receptor 2	Ryr2
3750	SASKGEtGPMV	0.267	0.149	-0.969	-0.184	-	E9Q401	Ryanodine receptor 2	Ryr2
3757	GPMVAAtLKLG	0.416	0.188	-0.312	0.097	-	E9Q401	Ryanodine receptor 2	Ryr2
3770	ILNGGNsTVQQ	0.191	-0.072	-0.884	-0.255	-	E9Q401	Ryanodine receptor 2	Ryr2
3771	LNGGNStVQQK	0.074	-0.272	-0.918	-0.372	-	E9Q401	Ryanodine receptor 2	Ryr2
3791	DVGFFQsLAGL	0.245	-0.008	-0.659	-0.141	-	E9Q401	Ryanodine receptor 2	Ryr2
3798	LAGLMQsCSVL	0.083	-0.076	-1.144	-0.379	-	E9Q401	Ryanodine receptor 2	Ryr2
3800	GLMQSCsVLDL	0.746	0.481	0.283	0.504	-	E9Q401	Ryanodine receptor 2	Ryr2
3820	EGLGMVtEEGS	0.187	-0.127	-0.557	-0.166	-	E9Q401	Ryanodine receptor 2	Ryr2
3824	MVTEEGsGEKV	0.057	-0.176	-1.659	-0.593	-	E9Q401	Ryanodine receptor 2	Ryr2
3835	LQDDEFtCDLF	0.141	0.028	-0.879	-0.237	-	E9Q401	Ryanodine receptor 2	Ryr2
3851	LCEGHNsDFQN	0.474	0.134	-0.463	0.048	-	E9Q401	Ryanodine receptor 2	Ryr2
3859	FQNYLRtQTGN	0.109	-0.111	-1.332	-0.445	-	E9Q401	Ryanodine receptor 2	Ryr2
3861	NYLRTQtGNNT	0.55	0.904	0.372	0.609	-	E9Q401	Ryanodine receptor 2	Ryr2
3865	TQTGNNtTVNI	0.238	0.05	-0.537	-0.083	-	E9Q401	Ryanodine receptor 2	Ryr2
3866	QTGNNTtVNII	0.268	-0.007	-0.301	-0.013	-	E9Q401	Ryanodine receptor 2	Ryr2
3872	TVNIIIsTVDY	0.197	0.012	-0.773	-0.188	-	E9Q401	Ryanodine receptor 2	Ryr2
3873	VNIIIStVDYL	0.086	-0.129	-0.979	-0.341	-	E9Q401	Ryanodine receptor 2	Ryr2
3883	LLRVQEsISDF	0.174	0.144	-0.794	-0.159	-	E9Q401	Ryanodine receptor 2	Ryr2
3885	RVQESIsDFYW	0.34	0.286	-0.474	0.051	-	E9Q401	Ryanodine receptor 2	Ryr2
3892	DFYWYYsGKDI	0.445	0.091	0.031	0.189	-	E9Q401	Ryanodine receptor 2	Ryr2
3906	QGQRNFsKAIQ	0.61	0.79	0.404	0.601	-	E9Q401	Ryanodine receptor 2	Ryr2
3918	AKQVFNtLTEY	0.695	0.208	-0.258	0.215	-	E9Q401	Ryanodine receptor 2	Ryr2
3920	QVFNTLtEYIQ	0.07	-0.023	-1.069	-0.341	-	E9Q401	Ryanodine receptor 2	Ryr2
3928	YIQGPCtGNQQ	0.21	-0.06	-0.629	-0.16	-	E9Q401	Ryanodine receptor 2	Ryr2
3933	CTGNQQsLAHS	0.101	-0.098	-0.812	-0.27	-	E9Q401	Ryanodine receptor 2	Ryr2
3937	QQSLAHsRLWD	0.203	0.03	-0.68	-0.149	-	E9Q401	Ryanodine receptor 2	Ryr2
3958	HMQMKLsQDSS	0.042	-0.047	-1.45	-0.485	-	E9Q401	Ryanodine receptor 2	Ryr2
3961	MKLSQDsSQIE	0.254	-0.098	-0.933	-0.259	-	E9Q401	Ryanodine receptor 2	Ryr2
3962	KLSQDSsQIEL	0.158	-0.1	-0.902	-0.282	-	E9Q401	Ryanodine receptor 2	Ryr2
3983	MVVMLLsMLEG	0.098	0.016	-1.25	-0.379	-	E9Q401	Ryanodine receptor 2	Ryr2
3993	GNVVNGtIGKQ	0.077	-0.264	-1.311	-0.499	-	E9Q401	Ryanodine receptor 2	Ryr2
4005	VDMLVEsSNNV	0.093	-0.152	-1.603	-0.554	-	E9Q401	Ryanodine receptor 2	Ryr2
4006	DMLVESsNNVE	0.074	-0.108	-1.519	-0.517	-	E9Q401	Ryanodine receptor 2	Ryr2
4026	LKLKDLtSSDT	0.225	-0.087	-0.653	-0.172	-	E9Q401	Ryanodine receptor 2	Ryr2
4027	KLKDLTsSDTF	0.23	-0.022	-0.751	-0.181	-	E9Q401	Ryanodine receptor 2	Ryr2
4028	LKDLTSsDTFK	0.128	-0.143	-1.181	-0.399	-	E9Q401	Ryanodine receptor 2	Ryr2
4030	DLTSSDtFKEY	0.677	0.251	-0.038	0.297	-	E9Q401	Ryanodine receptor 2	Ryr2
4043	DGKGVIsKRDF	0.361	-0.07	-0.364	-0.025	-	E9Q401	Ryanodine receptor 2	Ryr2
4053	FHKAMEsHKHY	0.241	-0.103	-0.93	-0.264	-	E9Q401	Ryanodine receptor 2	Ryr2
4058	ESHKHYtQSET	0.127	-0.112	-1.068	-0.351	-	E9Q401	Ryanodine receptor 2	Ryr2
4060	HKHYTQsETEF	0.27	0.202	-0.341	0.044	-	E9Q401	Ryanodine receptor 2	Ryr2
4062	HYTQSEtEFLL	0.556	0.406	0.227	0.396	-	E9Q401	Ryanodine receptor 2	Ryr2
4067	ETEFLLsCAET	0.081	-0.164	-1.301	-0.461	-	E9Q401	Ryanodine receptor 2	Ryr2
4071	LLSCAEtDENE	0.385	0.072	-0.833	-0.125	-	E9Q401	Ryanodine receptor 2	Ryr2
4076	ETDENEtLDYE	0.198	-0.116	-0.947	-0.288	-	E9Q401	Ryanodine receptor 2	Ryr2
4102	NVAVLLtNLSE	0.022	-0.309	-1.94	-0.742	-	E9Q401	Ryanodine receptor 2	Ryr2
4105	VLLTNLsEHMP	0.186	-0.073	-0.836	-0.241	-	E9Q401	Ryanodine receptor 2	Ryr2
4112	EHMPNDtRLQT	0.05	-0.353	-1.645	-0.649	-	E9Q401	Ryanodine receptor 2	Ryr2
4116	NDTRLQtFLEL	0.5	0.837	0.215	0.517	-	E9Q401	Ryanodine receptor 2	Ryr2
4123	FLELAEsVLNY	0.426	0.22	-0.676	-0.01	-	E9Q401	Ryanodine receptor 2	Ryr2
4140	RIEIMGsAKRI	0.248	-0.056	-0.857	-0.222	-	E9Q401	Ryanodine receptor 2	Ryr2
4152	RVYFEIsESSR	0.123	-0.037	-1.09	-0.335	-	E9Q401	Ryanodine receptor 2	Ryr2
4154	YFEISEsSRTQ	0.252	-0.006	-0.595	-0.117	-	E9Q401	Ryanodine receptor 2	Ryr2
4155	FEISESsRTQW	0.09	-0.238	-1.569	-0.573	-	E9Q401	Ryanodine receptor 2	Ryr2
4157	ISESSRtQWEK	0.364	-0.006	-0.695	-0.112	-	E9Q401	Ryanodine receptor 2	Ryr2
4167	KPQVKEsKRQF	0.069	-0.299	-1.4	-0.543	-	E9Q401	Ryanodine receptor 2	Ryr2
4195	VNFCEDtIFEM	0.144	-0.299	-1.195	-0.45	-	E9Q401	Ryanodine receptor 2	Ryr2
4206	QLAAQIsESDL	0.29	0.11	-0.428	-0.009	-	E9Q401	Ryanodine receptor 2	Ryr2
4208	AAQISEsDLNE	0.251	0.129	-1.071	-0.23	-	E9Q401	Ryanodine receptor 2	Ryr2
4220	LANKEEsEKER	0.253	-0.057	-0.899	-0.234	-	E9Q401	Ryanodine receptor 2	Ryr2
4236	PRMGFFsLLTI	0.417	0.372	-0.063	0.242	-	E9Q401	Ryanodine receptor 2	Ryr2
4239	GFFSLLtIQSA	0.071	-0.205	-1.192	-0.442	-	E9Q401	Ryanodine receptor 2	Ryr2
4242	SLLTIQsALFA	0.117	-0.096	-1.057	-0.345	-	E9Q401	Ryanodine receptor 2	Ryr2
4253	LRYNVLtLVRM	0.177	0.125	-0.571	-0.09	-	E9Q401	Ryanodine receptor 2	Ryr2
4259	TLVRMLsLKSL	0.572	0.877	0.474	0.641	-	E9Q401	Ryanodine receptor 2	Ryr2
4262	RMLSLKsLKKQ	0.198	0.065	-0.644	-0.127	-	E9Q401	Ryanodine receptor 2	Ryr2
4274	KRMKKMtVKDM	0.423	0.377	-0.099	0.234	-	E9Q401	Ryanodine receptor 2	Ryr2
4284	MVLAFFsSYWS	0.153	0	-0.842	-0.23	-	E9Q401	Ryanodine receptor 2	Ryr2
4285	VLAFFSsYWSV	0.145	-0.084	-1.198	-0.379	-	E9Q401	Ryanodine receptor 2	Ryr2
4288	FFSSYWsVFVT	0.247	-0.035	-0.58	-0.123	-	E9Q401	Ryanodine receptor 2	Ryr2
4292	YWSVFVtLLHF	0.157	-0.077	-0.752	-0.224	-	E9Q401	Ryanodine receptor 2	Ryr2
4299	LLHFVAsVCRG	0.249	-0.079	-0.927	-0.252	-	E9Q401	Ryanodine receptor 2	Ryr2
4309	GFFRIVsSLLL	0.742	0.93	0.582	0.751	-	E9Q401	Ryanodine receptor 2	Ryr2
4310	FFRIVSsLLLG	0.467	0.351	-0.167	0.217	-	E9Q401	Ryanodine receptor 2	Ryr2
4316	SLLLGGsLVEG	0.199	-0.027	-0.851	-0.226	-	E9Q401	Ryanodine receptor 2	Ryr2
4337	ANMPDPtQDEV	0.11	-0.269	-1.415	-0.525	-	E9Q401	Ryanodine receptor 2	Ryr2
4355	ERKPLEsALPS	0.072	-0.015	-1.387	-0.443	-	E9Q401	Ryanodine receptor 2	Ryr2
4359	LESALPsEDLT	0.118	-0.161	-1.028	-0.357	-	E9Q401	Ryanodine receptor 2	Ryr2
4363	LPSEDLtDLKE	0.042	-0.287	-1.784	-0.676	-	E9Q401	Ryanodine receptor 2	Ryr2
4369	TDLKELtEESD	0.091	-0.147	-1.135	-0.397	-	E9Q401	Ryanodine receptor 2	Ryr2
4372	KELTEEsDLLS	0.086	-0.215	-1.759	-0.629	-	E9Q401	Ryanodine receptor 2	Ryr2
4376	EESDLLsDIFG	0.046	-0.227	-1.638	-0.606	-	E9Q401	Ryanodine receptor 2	Ryr2
4402	NPNAGLsDLMT	0.042	-0.345	-1.808	-0.704	-	E9Q401	Ryanodine receptor 2	Ryr2
4406	GLSDLMtNPVP	0.637	0.592	-0.176	0.351	-	E9Q401	Ryanodine receptor 2	Ryr2
4433	KEEKEEtKSEP	0.132	-0.259	-1.384	-0.504	-	E9Q401	Ryanodine receptor 2	Ryr2
4435	EKEETKsEPEK	0.658	0.633	0.477	0.589	-	E9Q401	Ryanodine receptor 2	Ryr2
4456	KAKDEKsKQKL	0.271	-0.029	-0.647	-0.135	-	E9Q401	Ryanodine receptor 2	Ryr2
4465	KLRQLHtHRYG	0.648	0.289	-0.106	0.277	-	E9Q401	Ryanodine receptor 2	Ryr2
4476	EPEVPEsAFWK	0.069	-0.249	-1.271	-0.484	-	E9Q401	Ryanodine receptor 2	Ryr2
4521	LLFYKVsTSSV	0.148	-0.066	-1.022	-0.313	-	E9Q401	Ryanodine receptor 2	Ryr2
4522	LFYKVStSSVV	0.119	-0.114	-1.19	-0.395	-	E9Q401	Ryanodine receptor 2	Ryr2
4523	FYKVSTsSVVE	0.351	0.274	-0.324	0.101	-	E9Q401	Ryanodine receptor 2	Ryr2
4524	YKVSTSsVVEG	0.147	-0.009	-0.855	-0.239	-	E9Q401	Ryanodine receptor 2	Ryr2
4533	EGKELPtRTSS	0.046	-0.344	-1.616	-0.638	-	E9Q401	Ryanodine receptor 2	Ryr2
4535	KELPTRtSSDT	0.046	-0.232	-1.565	-0.583	-	E9Q401	Ryanodine receptor 2	Ryr2
4536	ELPTRTsSDTA	0.312	0.07	-0.486	-0.034	-	E9Q401	Ryanodine receptor 2	Ryr2
4537	LPTRTSsDTAK	0.504	0.807	0.164	0.491	-	E9Q401	Ryanodine receptor 2	Ryr2
4539	TRTSSDtAKVT	0.249	0.24	-0.596	-0.036	-	E9Q401	Ryanodine receptor 2	Ryr2
4543	SDTAKVtNSLD	0.076	-0.323	-1.409	-0.552	-	E9Q401	Ryanodine receptor 2	Ryr2
4545	TAKVTNsLDSS	0.164	0.04	-0.752	-0.183	-	E9Q401	Ryanodine receptor 2	Ryr2
4548	VTNSLDsSPHR	0.223	0.105	-0.905	-0.192	-	E9Q401	Ryanodine receptor 2	Ryr2
4549	TNSLDSsPHRI	0.052	-0.584	-1.64	-0.724	-	E9Q401	Ryanodine receptor 2	Ryr2
4563	HYVLEEsSGYM	0.164	-0.064	-1.137	-0.346	-	E9Q401	Ryanodine receptor 2	Ryr2
4564	YVLEESsGYME	0.045	-0.308	-1.604	-0.622	-	E9Q401	Ryanodine receptor 2	Ryr2
4570	SGYMEPtLRIL	0.215	-0.191	-0.783	-0.253	-	E9Q401	Ryanodine receptor 2	Ryr2
4579	ILAILHtIISF	0.118	0.037	-0.667	-0.171	-	E9Q401	Ryanodine receptor 2	Ryr2
4582	ILHTIIsFFCI	0.523	0.187	0.076	0.262	-	E9Q401	Ryanodine receptor 2	Ryr2
4617	FDGLYItEQPS	0.135	-0.054	-0.994	-0.304	-	E9Q401	Ryanodine receptor 2	Ryr2
4621	YITEQPsEDDI	0.307	0.197	-0.303	0.067	-	E9Q401	Ryanodine receptor 2	Ryr2
4636	DRLVINtQSFP	0.08	-0.059	-1.446	-0.475	-	E9Q401	Ryanodine receptor 2	Ryr2
4638	LVINTQsFPNN	0.445	0.657	0.075	0.392	-	E9Q401	Ryanodine receptor 2	Ryr2
4666	YGRDRIsELLG	0.585	0.432	-0.035	0.327	-	E9Q401	Ryanodine receptor 2	Ryr2
4679	KAALDFsDARE	0.127	-0.251	-1.321	-0.482	-	E9Q401	Ryanodine receptor 2	Ryr2
4691	KKPKKDsSLSA	0.091	-0.272	-1.426	-0.536	-	E9Q401	Ryanodine receptor 2	Ryr2
4692	KPKKDSsLSAV	0.305	-0.018	-0.656	-0.123	-	E9Q401	Ryanodine receptor 2	Ryr2
4694	KKDSSLsAVLN	0.287	0.167	-0.672	-0.073	-	E9Q401	Ryanodine receptor 2	Ryr2
4699	LSAVLNsIDVK	0.107	-0.155	-0.987	-0.345	-	E9Q401	Ryanodine receptor 2	Ryr2
4714	KLGVVFtDNSF	0.114	0.009	-0.989	-0.288	-	E9Q401	Ryanodine receptor 2	Ryr2
4717	VVFTDNsFLYL	0.199	-0.01	-0.974	-0.262	-	E9Q401	Ryanodine receptor 2	Ryr2
4726	YLAWYMtMSVL	0.398	0.308	-0.17	0.179	-	E9Q401	Ryanodine receptor 2	Ryr2
4728	AWYMTMsVLGH	0.093	-0.097	-1.152	-0.385	-	E9Q401	Ryanodine receptor 2	Ryr2
4751	IAMGFKtLRTI	0.518	0.061	0.105	0.228	-	E9Q401	Ryanodine receptor 2	Ryr2
4754	GFKTLRtILSS	0.06	-0.164	-1.451	-0.518	-	E9Q401	Ryanodine receptor 2	Ryr2
4757	TLRTILsSVTH	0.179	0.026	-0.87	-0.222	-	E9Q401	Ryanodine receptor 2	Ryr2
4758	LRTILSsVTHN	0.101	0.045	-0.98	-0.278	-	E9Q401	Ryanodine receptor 2	Ryr2
4760	TILSSVtHNGK	0.549	0.128	0.111	0.262	-	E9Q401	Ryanodine receptor 2	Ryr2
4769	GKQLVLtVGLL	0.434	0.215	-0.357	0.097	-	E9Q401	Ryanodine receptor 2	Ryr2
4781	VVVYLYtVVAF	0.101	0.06	-0.689	-0.176	-	E9Q401	Ryanodine receptor 2	Ryr2
4795	RKFYNKsEDGD	0.754	0.303	0.593	0.55	-	E9Q401	Ryanodine receptor 2	Ryr2
4800	KSEDGDtPDMK	0.048	-0.653	-1.829	-0.811	-	E9Q401	Ryanodine receptor 2	Ryr2
4810	KCDDMLtCYMF	0.092	-0.147	-1.432	-0.496	-	E9Q401	Ryanodine receptor 2	Ryr2
4848	RIIFDItFFFF	0.264	0.081	-0.573	-0.076	-	E9Q401	Ryanodine receptor 2	Ryr2
4885	VKEDMEtKCFI	0.231	-0.226	-0.847	-0.28	-	E9Q401	Ryanodine receptor 2	Ryr2
4899	GNDYFDtVPHG	0.431	0.28	-0.296	0.138	-	E9Q401	Ryanodine receptor 2	Ryr2
4906	VPHGFEtHTLQ	0.093	-0.266	-1.546	-0.573	-	E9Q401	Ryanodine receptor 2	Ryr2
4908	HGFETHtLQEH	0.24	0.173	-0.513	-0.033	-	E9Q401	Ryanodine receptor 2	Ryr2
4930	LINKDEtEHTG	0.343	0.064	-0.678	-0.09	-	E9Q401	Ryanodine receptor 2	Ryr2
4933	KDETEHtGQES	0.141	-0.158	-1.176	-0.398	-	E9Q401	Ryanodine receptor 2	Ryr2
4937	EHTGQEsYVWK	0.045	-0.204	-1.587	-0.582	-	E9Q401	Ryanodine receptor 2	Ryr2
11	EPEYGVsTEVP	0.089	-0.196	-1.099	-0.402	-	E9Q7D5	Rho guanine nucleotide exchange factor 5	Arhgef5
12	PEYGVStEVPD	0.11	-0.076	-1.004	-0.324	-	E9Q7D5	Rho guanine nucleotide exchange factor 5	Arhgef5
22	DIEELKtIPEG	0.593	0.489	0.026	0.369	-	E9Q7D5	Rho guanine nucleotide exchange factor 5	Arhgef5
30	PEGIMRsSQIP	0.076	-0.216	-1.475	-0.538	-	E9Q7D5	Rho guanine nucleotide exchange factor 5	Arhgef5
31	EGIMRSsQIPA	0.099	-0.144	-1	-0.348	-	E9Q7D5	Rho guanine nucleotide exchange factor 5	Arhgef5
47	QEDRDPsYKWT	0.265	0.559	-0.3	0.175	-	E9Q7D5	Rho guanine nucleotide exchange factor 5	Arhgef5
51	DPSYKWtDGHR	0.222	-0.142	-0.838	-0.252	-	E9Q7D5	Rho guanine nucleotide exchange factor 5	Arhgef5
61	RPVMNQsKVLR	0.208	-0.05	-0.663	-0.168	-	E9Q7D5	Rho guanine nucleotide exchange factor 5	Arhgef5
71	RDMGDHtPNSM	0.055	-0.285	-1.247	-0.493	-	E9Q7D5	Rho guanine nucleotide exchange factor 5	Arhgef5
74	GDHTPNsMAIF	0.09	-0.162	-1.399	-0.49	-	E9Q7D5	Rho guanine nucleotide exchange factor 5	Arhgef5
83	IFFKKEsSDME	0.252	-0.141	-0.817	-0.235	-	E9Q7D5	Rho guanine nucleotide exchange factor 5	Arhgef5
84	FFKKESsDMET	0.428	0.067	-0.506	-0.004	-	E9Q7D5	Rho guanine nucleotide exchange factor 5	Arhgef5
88	ESSDMEtSQEI	0.18	-0.189	-0.958	-0.323	-	E9Q7D5	Rho guanine nucleotide exchange factor 5	Arhgef5
89	SSDMETsQEIL	0.084	-0.303	-1.578	-0.599	-	E9Q7D5	Rho guanine nucleotide exchange factor 5	Arhgef5
100	LAEACNtPDQQ	0.194	-0.384	-0.943	-0.378	-	E9Q7D5	Rho guanine nucleotide exchange factor 5	Arhgef5
110	QEAVIQsLKDR	0.271	0.054	-0.208	0.039	-	E9Q7D5	Rho guanine nucleotide exchange factor 5	Arhgef5
116	SLKDRLsRTIA	0.376	0.029	-0.694	-0.096	-	E9Q7D5	Rho guanine nucleotide exchange factor 5	Arhgef5
118	KDRLSRtIAAP	0.195	0.196	-0.651	-0.087	-	E9Q7D5	Rho guanine nucleotide exchange factor 5	Arhgef5
138	EWLDIPsKLDN	0.166	-0.024	-0.749	-0.202	-	E9Q7D5	Rho guanine nucleotide exchange factor 5	Arhgef5
150	VGAELQsELMS	0.053	-0.193	-1.377	-0.506	-	E9Q7D5	Rho guanine nucleotide exchange factor 5	Arhgef5
154	LQSELMsLTLA	0.219	0.047	-0.5	-0.078	-	E9Q7D5	Rho guanine nucleotide exchange factor 5	Arhgef5
156	SELMSLtLAVS	0.195	0.052	-0.714	-0.156	-	E9Q7D5	Rho guanine nucleotide exchange factor 5	Arhgef5
160	SLTLAVsKEKE	0.324	0.012	-0.6	-0.088	-	E9Q7D5	Rho guanine nucleotide exchange factor 5	Arhgef5
168	EKEEEEtSPDT	0.479	0.368	-0.291	0.186	-	E9Q7D5	Rho guanine nucleotide exchange factor 5	Arhgef5
169	KEEEETsPDTS	0.048	-0.48	-1.724	-0.719	-	E9Q7D5	Rho guanine nucleotide exchange factor 5	Arhgef5
172	EETSPDtSIPR	0.05	-0.384	-1.39	-0.575	-	E9Q7D5	Rho guanine nucleotide exchange factor 5	Arhgef5
173	ETSPDTsIPRG	0.346	0.188	-0.431	0.034	-	E9Q7D5	Rho guanine nucleotide exchange factor 5	Arhgef5
178	TSIPRGsWPPC	0.313	0.361	-0.55	0.042	-	E9Q7D5	Rho guanine nucleotide exchange factor 5	Arhgef5
184	SWPPCKtHPGE	0.578	0.346	0.007	0.311	-	E9Q7D5	Rho guanine nucleotide exchange factor 5	Arhgef5
189	KTHPGEtEQTQ	0.067	-0.291	-1.56	-0.595	-	E9Q7D5	Rho guanine nucleotide exchange factor 5	Arhgef5
192	PGETEQtQGSG	0.158	-0.144	-1.071	-0.352	-	E9Q7D5	Rho guanine nucleotide exchange factor 5	Arhgef5
195	TEQTQGsGSEL	0.055	-0.21	-1.634	-0.596	-	E9Q7D5	Rho guanine nucleotide exchange factor 5	Arhgef5
197	QTQGSGsELLR	0.237	0.188	-0.572	-0.049	-	E9Q7D5	Rho guanine nucleotide exchange factor 5	Arhgef5
211	QLQLEAtQENQ	0.237	0.021	-1.255	-0.332	-	E9Q7D5	Rho guanine nucleotide exchange factor 5	Arhgef5
223	QEGFLQsQEAQ	0.081	-0.153	-1.465	-0.513	-	E9Q7D5	Rho guanine nucleotide exchange factor 5	Arhgef5
244	EIQEEGtLNEG	0.252	0.091	-0.635	-0.097	-	E9Q7D5	Rho guanine nucleotide exchange factor 5	Arhgef5
279	KQGQIQsYMLL	0.101	-0.076	-0.715	-0.23	-	E9Q7D5	Rho guanine nucleotide exchange factor 5	Arhgef5
293	WENEGLsGELE	0.029	-0.334	-1.802	-0.702	-	E9Q7D5	Rho guanine nucleotide exchange factor 5	Arhgef5
302	LEGLNYsERGQ	0.149	-0.089	-0.783	-0.241	-	E9Q7D5	Rho guanine nucleotide exchange factor 5	Arhgef5
319	VWVLRDsEEEG	0.321	0.125	-0.749	-0.101	-	E9Q7D5	Rho guanine nucleotide exchange factor 5	Arhgef5
328	EGQDQEsREVE	0.068	-0.174	-1.559	-0.555	-	E9Q7D5	Rho guanine nucleotide exchange factor 5	Arhgef5
338	EERRVAtQYTE	0.738	0.973	0.168	0.626	-	E9Q7D5	Rho guanine nucleotide exchange factor 5	Arhgef5
341	RVATQYtENQR	0.249	0.146	-0.337	0.019	-	E9Q7D5	Rho guanine nucleotide exchange factor 5	Arhgef5
350	QRLVEKsEIVK	0.209	0.219	-0.487	-0.02	-	E9Q7D5	Rho guanine nucleotide exchange factor 5	Arhgef5
363	QRDHDQtGKVM	0.117	0.026	-0.838	-0.232	-	E9Q7D5	Rho guanine nucleotide exchange factor 5	Arhgef5
378	QKEVVDsGDRV	0.212	-0.195	-1.18	-0.387	-	E9Q7D5	Rho guanine nucleotide exchange factor 5	Arhgef5
388	VQGNGDsGGQT	0.051	-0.353	-1.195	-0.499	-	E9Q7D5	Rho guanine nucleotide exchange factor 5	Arhgef5
392	GDSGGQtAVEG	0.104	-0.113	-1.151	-0.387	-	E9Q7D5	Rho guanine nucleotide exchange factor 5	Arhgef5
397	QTAVEGsRPGE	0.235	0.101	-0.807	-0.157	-	E9Q7D5	Rho guanine nucleotide exchange factor 5	Arhgef5
403	SRPGEDsKPSL	0.209	0.426	-0.745	-0.037	-	E9Q7D5	Rho guanine nucleotide exchange factor 5	Arhgef5
406	GEDSKPsLPVA	0.561	0.375	-0.135	0.267	-	E9Q7D5	Rho guanine nucleotide exchange factor 5	Arhgef5
411	PSLPVAsVDPE	0.232	-0.14	-0.716	-0.208	-	E9Q7D5	Rho guanine nucleotide exchange factor 5	Arhgef5
418	VDPEVLsPGTL	0.025	-0.531	-1.855	-0.787	-	E9Q7D5	Rho guanine nucleotide exchange factor 5	Arhgef5
421	EVLSPGtLFPG	0.108	-0.215	-0.812	-0.306	-	E9Q7D5	Rho guanine nucleotide exchange factor 5	Arhgef5
427	TLFPGIsSSVA	0.1	-0.178	-1.116	-0.398	-	E9Q7D5	Rho guanine nucleotide exchange factor 5	Arhgef5
428	LFPGISsSVAD	0.09	-0.095	-0.72	-0.242	-	E9Q7D5	Rho guanine nucleotide exchange factor 5	Arhgef5
429	FPGISSsVADI	0.289	0.226	-0.359	0.052	-	E9Q7D5	Rho guanine nucleotide exchange factor 5	Arhgef5
446	PVCEELsPQAP	0.039	-0.383	-1.611	-0.652	-	E9Q7D5	Rho guanine nucleotide exchange factor 5	Arhgef5
455	APALEPtEWSH	0.087	-0.261	-1.556	-0.577	-	E9Q7D5	Rho guanine nucleotide exchange factor 5	Arhgef5
458	LEPTEWsHQPI	0.176	-0.206	-1.04	-0.357	-	E9Q7D5	Rho guanine nucleotide exchange factor 5	Arhgef5
463	WSHQPIsPPAS	0.236	0.001	-0.369	-0.044	-	E9Q7D5	Rho guanine nucleotide exchange factor 5	Arhgef5
467	PISPPAsFAPE	0.193	-0.145	-0.716	-0.222	-	E9Q7D5	Rho guanine nucleotide exchange factor 5	Arhgef5
473	SFAPEEsLDNR	0.281	-0.026	-0.704	-0.15	-	E9Q7D5	Rho guanine nucleotide exchange factor 5	Arhgef5
478	ESLDNRtHNSQ	0.093	-0.179	-1.161	-0.416	-	E9Q7D5	Rho guanine nucleotide exchange factor 5	Arhgef5
481	DNRTHNsQQEE	0.571	0.14	-0.656	0.018	-	E9Q7D5	Rho guanine nucleotide exchange factor 5	Arhgef5
496	KGIEVVsASTS	0.106	-0.164	-1.361	-0.473	-	E9Q7D5	Rho guanine nucleotide exchange factor 5	Arhgef5
498	IEVVSAsTSVA	0.222	0.082	-0.739	-0.145	-	E9Q7D5	Rho guanine nucleotide exchange factor 5	Arhgef5
499	EVVSAStSVAP	0.058	-0.137	-1.232	-0.437	-	E9Q7D5	Rho guanine nucleotide exchange factor 5	Arhgef5
500	VVSASTsVAPS	0.164	-0.036	-0.688	-0.186	-	E9Q7D5	Rho guanine nucleotide exchange factor 5	Arhgef5
504	STSVAPsGTRD	0.155	-0.282	-1.286	-0.471	-	E9Q7D5	Rho guanine nucleotide exchange factor 5	Arhgef5
506	SVAPSGtRDSP	0.062	-0.167	-1.254	-0.453	-	E9Q7D5	Rho guanine nucleotide exchange factor 5	Arhgef5
509	PSGTRDsPPFS	0.235	0.056	-0.878	-0.196	-	E9Q7D5	Rho guanine nucleotide exchange factor 5	Arhgef5
513	RDSPPFsPPNV	0.196	0.036	-0.921	-0.23	-	E9Q7D5	Rho guanine nucleotide exchange factor 5	Arhgef5
519	SPPNVFsSTAT	0.076	-0.203	-1.252	-0.46	-	E9Q7D5	Rho guanine nucleotide exchange factor 5	Arhgef5
520	PPNVFSsTATL	0.052	-0.25	-1.612	-0.603	-	E9Q7D5	Rho guanine nucleotide exchange factor 5	Arhgef5
521	PNVFSStATLS	0.236	0.091	-0.733	-0.135	-	E9Q7D5	Rho guanine nucleotide exchange factor 5	Arhgef5
523	VFSSTAtLSPV	0.164	-0.093	-0.919	-0.283	-	E9Q7D5	Rho guanine nucleotide exchange factor 5	Arhgef5
525	SSTATLsPVSS	0.016	-0.567	-2.107	-0.886	-	E9Q7D5	Rho guanine nucleotide exchange factor 5	Arhgef5
528	ATLSPVsSSVI	0.179	-0.249	-0.969	-0.346	-	E9Q7D5	Rho guanine nucleotide exchange factor 5	Arhgef5
529	TLSPVSsSVIL	0.132	-0.134	-1.066	-0.356	-	E9Q7D5	Rho guanine nucleotide exchange factor 5	Arhgef5
530	LSPVSSsVILP	0.063	-0.078	-1.023	-0.346	-	E9Q7D5	Rho guanine nucleotide exchange factor 5	Arhgef5
537	VILPEEtPTAS	0.079	-0.405	-1.457	-0.594	-	E9Q7D5	Rho guanine nucleotide exchange factor 5	Arhgef5
539	LPEETPtASAS	0.057	-0.138	-1.386	-0.489	-	E9Q7D5	Rho guanine nucleotide exchange factor 5	Arhgef5
541	EETPTAsASAD	0.136	0.017	-0.881	-0.243	-	E9Q7D5	Rho guanine nucleotide exchange factor 5	Arhgef5
543	TPTASAsADTP	0.335	0.113	-0.464	-0.005	-	E9Q7D5	Rho guanine nucleotide exchange factor 5	Arhgef5
546	ASASADtPHHC	0.071	-0.609	-1.692	-0.743	-	E9Q7D5	Rho guanine nucleotide exchange factor 5	Arhgef5
555	HCGPCEtPPLP	0.251	0.134	-0.72	-0.112	-	E9Q7D5	Rho guanine nucleotide exchange factor 5	Arhgef5
562	PPLPAKsSRYP	0.194	-0.17	-0.765	-0.247	-	E9Q7D5	Rho guanine nucleotide exchange factor 5	Arhgef5
563	PLPAKSsRYPC	0.056	-0.342	-1.594	-0.627	-	E9Q7D5	Rho guanine nucleotide exchange factor 5	Arhgef5
569	SRYPCAtSDTA	0.236	0.084	-0.687	-0.122	-	E9Q7D5	Rho guanine nucleotide exchange factor 5	Arhgef5
570	RYPCATsDTAN	0.556	0.176	-0.432	0.1	-	E9Q7D5	Rho guanine nucleotide exchange factor 5	Arhgef5
572	PCATSDtANPH	0.349	0.044	-0.713	-0.107	-	E9Q7D5	Rho guanine nucleotide exchange factor 5	Arhgef5
577	DTANPHsPLSS	0.039	-0.429	-1.574	-0.655	-	E9Q7D5	Rho guanine nucleotide exchange factor 5	Arhgef5
580	NPHSPLsSYTG	0.041	-0.358	-1.582	-0.633	-	E9Q7D5	Rho guanine nucleotide exchange factor 5	Arhgef5
581	PHSPLSsYTGV	0.062	-0.335	-1.781	-0.685	-	E9Q7D5	Rho guanine nucleotide exchange factor 5	Arhgef5
583	SPLSSYtGVTQ	0.122	-0.028	-0.87	-0.259	-	E9Q7D5	Rho guanine nucleotide exchange factor 5	Arhgef5
586	SSYTGVtQHLR	0.114	-0.253	-1.38	-0.506	-	E9Q7D5	Rho guanine nucleotide exchange factor 5	Arhgef5
591	VTQHLRsNSFP	0.033	-0.373	-2.069	-0.803	-	E9Q7D5	Rho guanine nucleotide exchange factor 5	Arhgef5
593	QHLRSNsFPGS	0.948	1.589	1.498	1.345	-	E9Q7D5	Rho guanine nucleotide exchange factor 5	Arhgef5
597	SNSFPGsHRTE	0.068	-0.467	-1.438	-0.612	-	E9Q7D5	Rho guanine nucleotide exchange factor 5	Arhgef5
600	FPGSHRtEQTP	0.112	-0.042	-1.216	-0.382	-	E9Q7D5	Rho guanine nucleotide exchange factor 5	Arhgef5
603	SHRTEQtPDSL	0.091	-0.166	-1.539	-0.538	-	E9Q7D5	Rho guanine nucleotide exchange factor 5	Arhgef5
606	TEQTPDsLGMS	0.205	-0.165	-0.97	-0.31	-	E9Q7D5	Rho guanine nucleotide exchange factor 5	Arhgef5
610	PDSLGMsLSFS	0.083	-0.139	-1.138	-0.398	-	E9Q7D5	Rho guanine nucleotide exchange factor 5	Arhgef5
612	SLGMSLsFSHL	0.165	0.104	-0.563	-0.098	-	E9Q7D5	Rho guanine nucleotide exchange factor 5	Arhgef5
614	GMSLSFsHLEL	0.399	0.387	-0.301	0.161	-	E9Q7D5	Rho guanine nucleotide exchange factor 5	Arhgef5
630	KPAIYGsLTPR	0.213	-0.13	-0.766	-0.227	-	E9Q7D5	Rho guanine nucleotide exchange factor 5	Arhgef5
632	AIYGSLtPRRN	0.115	-0.234	-1.108	-0.409	-	E9Q7D5	Rho guanine nucleotide exchange factor 5	Arhgef5
639	PRRNRRsRDGI	0.668	0.563	0.262	0.497	-	E9Q7D5	Rho guanine nucleotide exchange factor 5	Arhgef5
646	RDGIVFsDSST	0.046	-0.188	-1.568	-0.57	-	E9Q7D5	Rho guanine nucleotide exchange factor 5	Arhgef5
648	GIVFSDsSTAL	0.519	0.306	-0.228	0.199	-	E9Q7D5	Rho guanine nucleotide exchange factor 5	Arhgef5
649	IVFSDSsTALF	0.064	-0.272	-1.359	-0.523	-	E9Q7D5	Rho guanine nucleotide exchange factor 5	Arhgef5
650	VFSDSStALFA	0.146	-0.007	-0.927	-0.262	-	E9Q7D5	Rho guanine nucleotide exchange factor 5	Arhgef5
659	FALKQDsEEFT	0.14	-0.102	-1.132	-0.364	-	E9Q7D5	Rho guanine nucleotide exchange factor 5	Arhgef5
663	QDSEEFtSNPE	0.047	-0.309	-1.448	-0.57	-	E9Q7D5	Rho guanine nucleotide exchange factor 5	Arhgef5
664	DSEEFTsNPER	0.497	0.317	-0.428	0.129	-	E9Q7D5	Rho guanine nucleotide exchange factor 5	Arhgef5
670	SNPERPsSPHG	0.194	0.227	-0.699	-0.093	-	E9Q7D5	Rho guanine nucleotide exchange factor 5	Arhgef5
671	NPERPSsPHGS	0.202	0.295	-0.494	0.001	-	E9Q7D5	Rho guanine nucleotide exchange factor 5	Arhgef5
675	PSSPHGsPTWG	0.08	-0.474	-1.373	-0.589	-	E9Q7D5	Rho guanine nucleotide exchange factor 5	Arhgef5
677	SPHGSPtWGSP	0.072	-0.004	-1.153	-0.362	-	E9Q7D5	Rho guanine nucleotide exchange factor 5	Arhgef5
680	GSPTWGsPQNS	0.057	-0.441	-1.771	-0.718	-	E9Q7D5	Rho guanine nucleotide exchange factor 5	Arhgef5
684	WGSPQNsAFAI	0.277	0.046	-0.445	-0.041	-	E9Q7D5	Rho guanine nucleotide exchange factor 5	Arhgef5
690	SAFAIGsPANV	0.034	-0.549	-2.127	-0.881	-	E9Q7D5	Rho guanine nucleotide exchange factor 5	Arhgef5
695	GSPANVsSPPT	0.495	0.21	-0.185	0.174	-	E9Q7D5	Rho guanine nucleotide exchange factor 5	Arhgef5
696	SPANVSsPPTV	0.123	-0.04	-1.119	-0.346	-	E9Q7D5	Rho guanine nucleotide exchange factor 5	Arhgef5
699	NVSSPPtVSMD	0.078	-0.349	-1.251	-0.507	-	E9Q7D5	Rho guanine nucleotide exchange factor 5	Arhgef5
701	SSPPTVsMDMT	0.073	-0.201	-1.357	-0.495	-	E9Q7D5	Rho guanine nucleotide exchange factor 5	Arhgef5
705	TVSMDMtIREA	0.179	-0.149	-0.712	-0.227	-	E9Q7D5	Rho guanine nucleotide exchange factor 5	Arhgef5
720	PPEKRHsYSHI	0.448	0.16	-0.186	0.141	-	E9Q7D5	Rho guanine nucleotide exchange factor 5	Arhgef5
722	EKRHSYsHIVE	0.677	0.556	0.546	0.593	-	E9Q7D5	Rho guanine nucleotide exchange factor 5	Arhgef5
736	LLHEVAsTLKR	0.122	-0.049	-1.187	-0.371	-	E9Q7D5	Rho guanine nucleotide exchange factor 5	Arhgef5
737	LHEVAStLKRH	0.114	-0.213	-1.293	-0.464	-	E9Q7D5	Rho guanine nucleotide exchange factor 5	Arhgef5
742	STLKRHsHPPP	0.777	0.611	0.253	0.547	-	E9Q7D5	Rho guanine nucleotide exchange factor 5	Arhgef5
748	SHPPPLtLSSG	0.03	-0.363	-1.83	-0.721	-	E9Q7D5	Rho guanine nucleotide exchange factor 5	Arhgef5
750	PPPLTLsSGLH	0.047	-0.225	-1.635	-0.604	-	E9Q7D5	Rho guanine nucleotide exchange factor 5	Arhgef5
751	PPLTLSsGLHR	0.042	-0.331	-1.499	-0.596	-	E9Q7D5	Rho guanine nucleotide exchange factor 5	Arhgef5
756	SSGLHRsSKGS	0.047	-0.28	-1.714	-0.649	-	E9Q7D5	Rho guanine nucleotide exchange factor 5	Arhgef5
757	SGLHRSsKGSF	0.111	-0.086	-0.892	-0.289	-	E9Q7D5	Rho guanine nucleotide exchange factor 5	Arhgef5
760	HRSSKGsFSLV	0.097	0.053	-1.206	-0.352	-	E9Q7D5	Rho guanine nucleotide exchange factor 5	Arhgef5
762	SSKGSFsLVPD	0.439	0.207	0.067	0.238	-	E9Q7D5	Rho guanine nucleotide exchange factor 5	Arhgef5
767	FSLVPDsTVAR	0.112	-0.152	-0.979	-0.34	-	E9Q7D5	Rho guanine nucleotide exchange factor 5	Arhgef5
768	SLVPDStVARQ	0.065	-0.33	-1.612	-0.626	-	E9Q7D5	Rho guanine nucleotide exchange factor 5	Arhgef5
778	QHRPLPsTPES	0.479	0.491	-0.409	0.187	-	E9Q7D5	Rho guanine nucleotide exchange factor 5	Arhgef5
779	HRPLPStPESP	0.016	-0.382	-1.894	-0.753	-	E9Q7D5	Rho guanine nucleotide exchange factor 5	Arhgef5
782	LPSTPEsPNHT	0.031	-0.646	-1.604	-0.74	-	E9Q7D5	Rho guanine nucleotide exchange factor 5	Arhgef5
786	PESPNHtQTSI	0.238	-0.052	-0.878	-0.231	-	E9Q7D5	Rho guanine nucleotide exchange factor 5	Arhgef5
788	SPNHTQtSIPS	0.033	-0.261	-1.646	-0.624	-	E9Q7D5	Rho guanine nucleotide exchange factor 5	Arhgef5
789	PNHTQTsIPSR	0.177	0.242	-0.627	-0.069	-	E9Q7D5	Rho guanine nucleotide exchange factor 5	Arhgef5
792	TQTSIPsRLRY	0.078	-0.353	-1.317	-0.531	-	E9Q7D5	Rho guanine nucleotide exchange factor 5	Arhgef5
803	NKPLPPtPDMP	0.061	-0.54	-1.464	-0.648	-	E9Q7D5	Rho guanine nucleotide exchange factor 5	Arhgef5
813	PEFYHPsISSS	0.069	-0.178	-1.313	-0.474	-	E9Q7D5	Rho guanine nucleotide exchange factor 5	Arhgef5
815	FYHPSIsSSYI	0.283	0.133	-0.523	-0.036	-	E9Q7D5	Rho guanine nucleotide exchange factor 5	Arhgef5
816	YHPSISsSYIS	0.04	-0.293	-1.704	-0.652	-	E9Q7D5	Rho guanine nucleotide exchange factor 5	Arhgef5
817	HPSISSsYISR	0.072	0.027	-0.84	-0.247	-	E9Q7D5	Rho guanine nucleotide exchange factor 5	Arhgef5
820	ISSSYIsRMYR	0.188	-0.291	-1.019	-0.374	-	E9Q7D5	Rho guanine nucleotide exchange factor 5	Arhgef5
835	VPIIDPsSEPP	0.043	-0.353	-1.691	-0.667	-	E9Q7D5	Rho guanine nucleotide exchange factor 5	Arhgef5
836	PIIDPSsEPPP	0.332	0.399	-0.338	0.131	-	E9Q7D5	Rho guanine nucleotide exchange factor 5	Arhgef5
845	PPLPPKsRGRS	0.175	-0.268	-0.879	-0.324	-	E9Q7D5	Rho guanine nucleotide exchange factor 5	Arhgef5
849	PKSRGRsKSIQ	0.5	0.708	-0.071	0.379	-	E9Q7D5	Rho guanine nucleotide exchange factor 5	Arhgef5
851	SRGRSKsIQGG	0.778	1.202	0.974	0.985	-	E9Q7D5	Rho guanine nucleotide exchange factor 5	Arhgef5
859	QGGVIHsGGQA	0.157	-0.045	-0.555	-0.148	-	E9Q7D5	Rho guanine nucleotide exchange factor 5	Arhgef5
873	PNNQDWtASTL	0.133	-0.196	-1.085	-0.383	-	E9Q7D5	Rho guanine nucleotide exchange factor 5	Arhgef5
875	NQDWTAsTLSV	0.074	-0.137	-1.375	-0.479	-	E9Q7D5	Rho guanine nucleotide exchange factor 5	Arhgef5
876	QDWTAStLSVG	0.118	0.017	-0.914	-0.26	-	E9Q7D5	Rho guanine nucleotide exchange factor 5	Arhgef5
878	WTASTLsVGRT	0.096	-0.227	-1.067	-0.399	-	E9Q7D5	Rho guanine nucleotide exchange factor 5	Arhgef5
882	TLSVGRtSWPP	0.053	-0.225	-1.556	-0.576	-	E9Q7D5	Rho guanine nucleotide exchange factor 5	Arhgef5
883	LSVGRTsWPPA	0.503	0.544	0.215	0.421	-	E9Q7D5	Rho guanine nucleotide exchange factor 5	Arhgef5
888	TSWPPAtGRST	0.044	-0.331	-1.304	-0.53	-	E9Q7D5	Rho guanine nucleotide exchange factor 5	Arhgef5
891	PPATGRsTESL	0.044	-0.197	-1.524	-0.559	-	E9Q7D5	Rho guanine nucleotide exchange factor 5	Arhgef5
892	PATGRStESLP	0.122	-0.008	-0.898	-0.261	-	E9Q7D5	Rho guanine nucleotide exchange factor 5	Arhgef5
894	TGRSTEsLPLT	0.668	0.648	0.319	0.545	-	E9Q7D5	Rho guanine nucleotide exchange factor 5	Arhgef5
898	TESLPLtSRCN	0.06	-0.287	-1.527	-0.585	-	E9Q7D5	Rho guanine nucleotide exchange factor 5	Arhgef5
899	ESLPLTsRCNN	0.055	-0.338	-1.593	-0.625	-	E9Q7D5	Rho guanine nucleotide exchange factor 5	Arhgef5
906	RCNNEVsPGLA	0.223	-0.251	-0.991	-0.339	-	E9Q7D5	Rho guanine nucleotide exchange factor 5	Arhgef5
912	SPGLAFsNMTN	0.117	-0.087	-1.345	-0.438	-	E9Q7D5	Rho guanine nucleotide exchange factor 5	Arhgef5
915	LAFSNMtNLLS	0.116	-0.084	-1.154	-0.374	-	E9Q7D5	Rho guanine nucleotide exchange factor 5	Arhgef5
919	NMTNLLsPSSP	0.013	-0.491	-2.094	-0.857	-	E9Q7D5	Rho guanine nucleotide exchange factor 5	Arhgef5
921	TNLLSPsSPTT	0.458	0.383	-0.012	0.276	-	E9Q7D5	Rho guanine nucleotide exchange factor 5	Arhgef5
922	NLLSPSsPTTP	0.052	-0.548	-1.46	-0.652	-	E9Q7D5	Rho guanine nucleotide exchange factor 5	Arhgef5
924	LSPSSPtTPWI	0.578	0.488	0.283	0.45	-	E9Q7D5	Rho guanine nucleotide exchange factor 5	Arhgef5
925	SPSSPTtPWIP	0.04	-0.622	-1.813	-0.798	-	E9Q7D5	Rho guanine nucleotide exchange factor 5	Arhgef5
935	PDLQRPtTKDE	0.31	-0.028	-0.443	-0.054	-	E9Q7D5	Rho guanine nucleotide exchange factor 5	Arhgef5
936	DLQRPTtKDES	0.801	0.933	0.683	0.806	-	E9Q7D5	Rho guanine nucleotide exchange factor 5	Arhgef5
940	PTTKDEsGLTE	0.176	-0.206	-1.079	-0.369	-	E9Q7D5	Rho guanine nucleotide exchange factor 5	Arhgef5
943	KDESGLtEESE	0.026	-0.373	-1.771	-0.706	-	E9Q7D5	Rho guanine nucleotide exchange factor 5	Arhgef5
946	SGLTEEsEPPV	0.361	0.29	-0.765	-0.038	-	E9Q7D5	Rho guanine nucleotide exchange factor 5	Arhgef5
953	EPPVRGsFRRS	0.099	-0.194	-1.322	-0.472	-	E9Q7D5	Rho guanine nucleotide exchange factor 5	Arhgef5
957	RGSFRRsAPQE	0.712	0.597	0.086	0.465	-	E9Q7D5	Rho guanine nucleotide exchange factor 5	Arhgef5
966	QEEFNNtRRSA	0.168	-0.235	-1.045	-0.371	-	E9Q7D5	Rho guanine nucleotide exchange factor 5	Arhgef5
969	FNNTRRsALGS	0.137	-0.003	-1.266	-0.377	-	E9Q7D5	Rho guanine nucleotide exchange factor 5	Arhgef5
973	RRSALGsRKNS	0.089	-0.058	-1.489	-0.486	-	E9Q7D5	Rho guanine nucleotide exchange factor 5	Arhgef5
977	LGSRKNsEKPL	0.52	0.823	0.312	0.552	-	E9Q7D5	Rho guanine nucleotide exchange factor 5	Arhgef5
989	HQLEKAsSWPH	0.064	-0.205	-1.34	-0.494	-	E9Q7D5	Rho guanine nucleotide exchange factor 5	Arhgef5
990	QLEKASsWPHR	0.716	0.625	0.54	0.627	-	E9Q7D5	Rho guanine nucleotide exchange factor 5	Arhgef5
1000	RRDPARtSESS	0.083	0.077	-1.314	-0.385	-	E9Q7D5	Rho guanine nucleotide exchange factor 5	Arhgef5
1001	RDPARTsESSS	0.085	-0.089	-1.236	-0.413	-	E9Q7D5	Rho guanine nucleotide exchange factor 5	Arhgef5
1003	PARTSEsSSEQ	0.385	0.206	-0.637	-0.016	-	E9Q7D5	Rho guanine nucleotide exchange factor 5	Arhgef5
1004	ARTSESsSEQV	0.102	-0.085	-1.441	-0.475	-	E9Q7D5	Rho guanine nucleotide exchange factor 5	Arhgef5
1005	RTSESSsEQVV	0.283	0.2	-0.763	-0.094	-	E9Q7D5	Rho guanine nucleotide exchange factor 5	Arhgef5
1029	QGLRRPsILPE	0.45	0.725	0.182	0.452	-	E9Q7D5	Rho guanine nucleotide exchange factor 5	Arhgef5
1034	PSILPEsSSDL	0.103	-0.186	-1.234	-0.439	-	E9Q7D5	Rho guanine nucleotide exchange factor 5	Arhgef5
1035	SILPESsSDLR	0.089	-0.161	-1.246	-0.439	-	E9Q7D5	Rho guanine nucleotide exchange factor 5	Arhgef5
1036	ILPESSsDLRN	0.217	0.074	-0.926	-0.212	-	E9Q7D5	Rho guanine nucleotide exchange factor 5	Arhgef5
1049	AGRLPGsSDSV	0.133	-0.055	-1.188	-0.37	-	E9Q7D5	Rho guanine nucleotide exchange factor 5	Arhgef5
1050	GRLPGSsDSVV	0.1	0.037	-1.37	-0.411	-	E9Q7D5	Rho guanine nucleotide exchange factor 5	Arhgef5
1052	LPGSSDsVVFR	0.122	-0.081	-1.021	-0.326	-	E9Q7D5	Rho guanine nucleotide exchange factor 5	Arhgef5
1068	EGMGGFsRRCS	0.057	-0.184	-1.196	-0.441	-	E9Q7D5	Rho guanine nucleotide exchange factor 5	Arhgef5
1072	GFSRRCsKLIS	0.824	0.988	0.519	0.777	-	E9Q7D5	Rho guanine nucleotide exchange factor 5	Arhgef5
1076	RCSKLIsSQLL	0.36	0.063	-0.668	-0.082	-	E9Q7D5	Rho guanine nucleotide exchange factor 5	Arhgef5
1077	CSKLISsQLLY	0.14	-0.125	-1.037	-0.34	-	E9Q7D5	Rho guanine nucleotide exchange factor 5	Arhgef5
1085	LLYQEYsDVVL	0.301	0.201	-0.392	0.037	-	E9Q7D5	Rho guanine nucleotide exchange factor 5	Arhgef5
1095	LNKEIQsQQRL	0.113	-0.177	-0.961	-0.342	-	E9Q7D5	Rho guanine nucleotide exchange factor 5	Arhgef5
1101	SQQRLDsLAEP	0.422	0.689	-0.155	0.319	-	E9Q7D5	Rho guanine nucleotide exchange factor 5	Arhgef5
1109	AEPHGLsSPRH	0.1	-0.033	-1.455	-0.463	-	E9Q7D5	Rho guanine nucleotide exchange factor 5	Arhgef5
1110	EPHGLSsPRHR	0.015	-0.658	-1.945	-0.863	-	E9Q7D5	Rho guanine nucleotide exchange factor 5	Arhgef5
1120	RRKALVsSDSY	0.374	0.187	-0.537	0.008	-	E9Q7D5	Rho guanine nucleotide exchange factor 5	Arhgef5
1121	RKALVSsDSYL	0.217	-0.016	-0.952	-0.25	-	E9Q7D5	Rho guanine nucleotide exchange factor 5	Arhgef5
1123	ALVSSDsYLQR	0.247	0.009	-0.723	-0.156	-	E9Q7D5	Rho guanine nucleotide exchange factor 5	Arhgef5
1129	SYLQRLsMASS	0.105	0.037	-1.135	-0.331	-	E9Q7D5	Rho guanine nucleotide exchange factor 5	Arhgef5
1132	QRLSMAsSGSL	0.179	0.09	-0.718	-0.15	-	E9Q7D5	Rho guanine nucleotide exchange factor 5	Arhgef5
1133	RLSMASsGSLW	0.165	-0.052	-0.857	-0.248	-	E9Q7D5	Rho guanine nucleotide exchange factor 5	Arhgef5
1135	SMASSGsLWQE	0.319	0.173	-0.427	0.022	-	E9Q7D5	Rho guanine nucleotide exchange factor 5	Arhgef5
1146	IPVVRNsTVLL	0.263	0.132	-0.72	-0.108	-	E9Q7D5	Rho guanine nucleotide exchange factor 5	Arhgef5
1147	PVVRNStVLLS	0.343	0.775	-0.098	0.34	-	E9Q7D5	Rho guanine nucleotide exchange factor 5	Arhgef5
1151	NSTVLLsMTHE	0.056	-0.216	-1.464	-0.541	-	E9Q7D5	Rho guanine nucleotide exchange factor 5	Arhgef5
1153	TVLLSMtHEDQ	0.451	0.304	-0.149	0.202	-	E9Q7D5	Rho guanine nucleotide exchange factor 5	Arhgef5
1169	KFELIVsEASY	0.252	-0.038	-0.607	-0.131	-	E9Q7D5	Rho guanine nucleotide exchange factor 5	Arhgef5
1172	LIVSEAsYLRS	0.078	-0.215	-1.546	-0.561	-	E9Q7D5	Rho guanine nucleotide exchange factor 5	Arhgef5
1176	EASYLRsLNIA	0.21	-0.058	-0.635	-0.161	-	E9Q7D5	Rho guanine nucleotide exchange factor 5	Arhgef5
1187	VDHFQHsAQLR	0.127	0.015	-1.124	-0.327	-	E9Q7D5	Rho guanine nucleotide exchange factor 5	Arhgef5
1193	SAQLRGtLSNQ	0.182	0.009	-1.179	-0.329	-	E9Q7D5	Rho guanine nucleotide exchange factor 5	Arhgef5
1195	QLRGTLsNQDH	0.247	0.188	-0.656	-0.074	-	E9Q7D5	Rho guanine nucleotide exchange factor 5	Arhgef5
1204	DHQWLFsRLQD	0.181	-0.146	-1.209	-0.391	-	E9Q7D5	Rho guanine nucleotide exchange factor 5	Arhgef5
1213	QDVRDVsTTFL	0.445	0.632	-0.112	0.322	-	E9Q7D5	Rho guanine nucleotide exchange factor 5	Arhgef5
1214	DVRDVStTFLS	0.249	0.122	-0.91	-0.18	-	E9Q7D5	Rho guanine nucleotide exchange factor 5	Arhgef5
1215	VRDVSTtFLSD	0.241	0.337	-0.407	0.057	-	E9Q7D5	Rho guanine nucleotide exchange factor 5	Arhgef5
1218	VSTTFLsDLEE	0.111	-0.228	-1.405	-0.507	-	E9Q7D5	Rho guanine nucleotide exchange factor 5	Arhgef5
1230	FENNIFsFQVC	0.202	0.084	-0.663	-0.126	-	E9Q7D5	Rho guanine nucleotide exchange factor 5	Arhgef5
1253	VYLPYVtNQTY	0.396	-0.076	-0.609	-0.096	-	E9Q7D5	Rho guanine nucleotide exchange factor 5	Arhgef5
1256	PYVTNQtYQER	0.321	0.018	-0.495	-0.052	-	E9Q7D5	Rho guanine nucleotide exchange factor 5	Arhgef5
1261	QTYQERtFQSL	0.132	-0.05	-0.973	-0.297	-	E9Q7D5	Rho guanine nucleotide exchange factor 5	Arhgef5
1264	QERTFQsLMNS	0.455	0.258	-0.544	0.056	-	E9Q7D5	Rho guanine nucleotide exchange factor 5	Arhgef5
1268	FQSLMNsNSSF	0.064	-0.189	-1.385	-0.503	-	E9Q7D5	Rho guanine nucleotide exchange factor 5	Arhgef5
1270	SLMNSNsSFRE	0.36	0.165	-0.487	0.013	-	E9Q7D5	Rho guanine nucleotide exchange factor 5	Arhgef5
1271	LMNSNSsFREV	0.147	-0.049	-1.041	-0.314	-	E9Q7D5	Rho guanine nucleotide exchange factor 5	Arhgef5
1281	VLEKLEsDPIC	0.715	0.428	-0.2	0.315	-	E9Q7D5	Rho guanine nucleotide exchange factor 5	Arhgef5
1289	PICQRLsLKSF	0.327	0.194	-0.23	0.097	-	E9Q7D5	Rho guanine nucleotide exchange factor 5	Arhgef5
1292	QRLSLKsFLIL	0.269	0.209	-0.44	0.013	-	E9Q7D5	Rho guanine nucleotide exchange factor 5	Arhgef5
1302	LPFQRItRLKL	0.207	-0.014	-0.8	-0.202	-	E9Q7D5	Rho guanine nucleotide exchange factor 5	Arhgef5
1315	QNILKRtQPGS	0.166	0.185	-0.987	-0.212	-	E9Q7D5	Rho guanine nucleotide exchange factor 5	Arhgef5
1319	KRTQPGsSEEA	0.136	-0.05	-0.857	-0.257	-	E9Q7D5	Rho guanine nucleotide exchange factor 5	Arhgef5
1320	RTQPGSsEEAE	0.126	-0.054	-1.006	-0.311	-	E9Q7D5	Rho guanine nucleotide exchange factor 5	Arhgef5
1326	SEEAEAtKAHH	0.064	-0.42	-1.686	-0.681	-	E9Q7D5	Rho guanine nucleotide exchange factor 5	Arhgef5
1341	LIRDCNsNVQR	0.609	0.316	-0.226	0.233	-	E9Q7D5	Rho guanine nucleotide exchange factor 5	Arhgef5
1349	VQRMRRtEELI	0.527	0.396	-0.011	0.304	-	E9Q7D5	Rho guanine nucleotide exchange factor 5	Arhgef5
1356	EELIYLsQKIE	0.081	-0.214	-1.427	-0.52	-	E9Q7D5	Rho guanine nucleotide exchange factor 5	Arhgef5
1370	KIFPLIsQSRW	0.074	-0.261	-1.664	-0.617	-	E9Q7D5	Rho guanine nucleotide exchange factor 5	Arhgef5
1372	FPLISQsRWLV	0.391	0.233	-0.572	0.017	-	E9Q7D5	Rho guanine nucleotide exchange factor 5	Arhgef5
1378	SRWLVKsGELT	0.128	0.201	-0.861	-0.177	-	E9Q7D5	Rho guanine nucleotide exchange factor 5	Arhgef5
1382	VKSGELtALEF	0.112	-0.11	-1.192	-0.397	-	E9Q7D5	Rho guanine nucleotide exchange factor 5	Arhgef5
1387	LTALEFsVSPG	0.11	-0.166	-1.079	-0.378	-	E9Q7D5	Rho guanine nucleotide exchange factor 5	Arhgef5
1389	ALEFSVsPGLR	0.585	0.052	-0.02	0.206	-	E9Q7D5	Rho guanine nucleotide exchange factor 5	Arhgef5
1397	GLRRKLtTRPV	0.761	1.003	0.354	0.706	-	E9Q7D5	Rho guanine nucleotide exchange factor 5	Arhgef5
1398	LRRKLTtRPVH	0.727	0.765	0.177	0.556	-	E9Q7D5	Rho guanine nucleotide exchange factor 5	Arhgef5
1413	NDCLLLsRPRE	0.188	0.087	-1.094	-0.273	-	E9Q7D5	Rho guanine nucleotide exchange factor 5	Arhgef5
1419	SRPREGsRFLV	0.316	0.768	-0.699	0.129	-	E9Q7D5	Rho guanine nucleotide exchange factor 5	Arhgef5
1430	FDHAPFsSIRG	0.06	-0.275	-1.284	-0.5	-	E9Q7D5	Rho guanine nucleotide exchange factor 5	Arhgef5
1431	DHAPFSsIRGE	0.082	-0.393	-1.491	-0.601	-	E9Q7D5	Rho guanine nucleotide exchange factor 5	Arhgef5
1460	LHNAQGtQVEF	0.047	-0.261	-1.973	-0.729	-	E9Q7D5	Rho guanine nucleotide exchange factor 5	Arhgef5
1468	VEFLFRtETQS	0.152	-0.107	-1.351	-0.435	-	E9Q7D5	Rho guanine nucleotide exchange factor 5	Arhgef5
1470	FLFRTEtQSEK	0.565	0.875	-0.085	0.452	-	E9Q7D5	Rho guanine nucleotide exchange factor 5	Arhgef5
1472	FRTETQsEKLR	0.186	0.38	-0.452	0.038	-	E9Q7D5	Rho guanine nucleotide exchange factor 5	Arhgef5
1479	EKLRWIsALAM	0.779	1.016	0.764	0.853	-	E9Q7D5	Rho guanine nucleotide exchange factor 5	Arhgef5
1496	LLECYDsPQVQ	0.171	-0.333	-1.134	-0.432	-	E9Q7D5	Rho guanine nucleotide exchange factor 5	Arhgef5
1524	ADVVMVtQQSS	0.054	-0.361	-1.639	-0.649	-	E9Q7D5	Rho guanine nucleotide exchange factor 5	Arhgef5
1527	VMVTQQsSDGW	0.092	-0.024	-1.187	-0.373	-	E9Q7D5	Rho guanine nucleotide exchange factor 5	Arhgef5
1528	MVTQQSsDGWL	0.228	0.129	-0.524	-0.056	-	E9Q7D5	Rho guanine nucleotide exchange factor 5	Arhgef5
1538	LEGVRLsDGEQ	0.176	0.045	-1.019	-0.266	-	E9Q7D5	Rho guanine nucleotide exchange factor 5	Arhgef5
1554	QQVEFIsNPEV	0.346	0.356	-0.658	0.015	-	E9Q7D5	Rho guanine nucleotide exchange factor 5	Arhgef5
1571	EAHRVKtAKLQ	0.479	0.784	-0.001	0.421	-	E9Q7D5	Rho guanine nucleotide exchange factor 5	Arhgef5
7	MAAAVRsVKGL	0.183	-0.063	-0.765	-0.215	-	O08756	3-hydroxyacyl-CoA dehydrogenase type-2	Hsd17b10
16	GLVAVVtGGAS	0.543	0.115	-0.193	0.155	-	O08756	3-hydroxyacyl-CoA dehydrogenase type-2	Hsd17b10
20	VVTGGAsGPWL	0.324	0.408	-0.076	0.218	-	O08756	3-hydroxyacyl-CoA dehydrogenase type-2	Hsd17b10
26	SGPWLAtAKRL	0.102	-0.228	-1.381	-0.503	-	O08756	3-hydroxyacyl-CoA dehydrogenase type-2	Hsd17b10
36	LVGQGAtAVLL	0.11	0.007	-0.957	-0.28	-	O08756	3-hydroxyacyl-CoA dehydrogenase type-2	Hsd17b10
45	LLDVPDsEGES	0.19	-0.052	-0.825	-0.229	-	O08756	3-hydroxyacyl-CoA dehydrogenase type-2	Hsd17b10
49	PDSEGEsQAKK	0.025	-0.469	-2.101	-0.848	-	O08756	3-hydroxyacyl-CoA dehydrogenase type-2	Hsd17b10
57	AKKLGEsCIFA	0.155	-0.097	-0.973	-0.305	-	O08756	3-hydroxyacyl-CoA dehydrogenase type-2	Hsd17b10
66	FAPANVtSEKE	0.144	-0.206	-1.102	-0.388	-	O08756	3-hydroxyacyl-CoA dehydrogenase type-2	Hsd17b10
67	APANVTsEKEI	0.267	0.007	-0.424	-0.05	-	O08756	3-hydroxyacyl-CoA dehydrogenase type-2	Hsd17b10
76	EIQAALtLAKE	0.227	0.057	-0.585	-0.1	-	O08756	3-hydroxyacyl-CoA dehydrogenase type-2	Hsd17b10
100	IAVAIKtYHQK	0.267	-0.161	-0.444	-0.113	-	O08756	3-hydroxyacyl-CoA dehydrogenase type-2	Hsd17b10
110	KKNKIHtLEDF	0.709	0.31	0.281	0.434	-	O08756	3-hydroxyacyl-CoA dehydrogenase type-2	Hsd17b10
125	NVNLIGtFNVI	0.228	0.067	-0.478	-0.061	-	O08756	3-hydroxyacyl-CoA dehydrogenase type-2	Hsd17b10
153	RGVIINtASVA	0.183	0.03	-0.871	-0.219	-	O08756	3-hydroxyacyl-CoA dehydrogenase type-2	Hsd17b10
155	VIINTAsVAAF	0.138	0.094	-0.679	-0.149	-	O08756	3-hydroxyacyl-CoA dehydrogenase type-2	Hsd17b10
169	VGQAAYsASKG	0.202	0.04	-0.728	-0.162	-	O08756	3-hydroxyacyl-CoA dehydrogenase type-2	Hsd17b10
171	QAAYSAsKGGI	0.598	0.246	0.42	0.421	-	O08756	3-hydroxyacyl-CoA dehydrogenase type-2	Hsd17b10
179	GGIDGMtLPIA	0.794	0.658	0.478	0.643	-	O08756	3-hydroxyacyl-CoA dehydrogenase type-2	Hsd17b10
189	ARDLAPtGIRV	0.182	0.001	-1.15	-0.322	-	O08756	3-hydroxyacyl-CoA dehydrogenase type-2	Hsd17b10
195	TGIRVVtIAPG	0.521	0.668	0.135	0.441	-	O08756	3-hydroxyacyl-CoA dehydrogenase type-2	Hsd17b10
203	APGLFAtPLLT	0.042	-0.481	-1.922	-0.787	-	O08756	3-hydroxyacyl-CoA dehydrogenase type-2	Hsd17b10
207	FATPLLtTLPE	0.045	-0.288	-1.559	-0.601	-	O08756	3-hydroxyacyl-CoA dehydrogenase type-2	Hsd17b10
208	ATPLLTtLPEK	0.587	0.366	-0.164	0.263	-	O08756	3-hydroxyacyl-CoA dehydrogenase type-2	Hsd17b10
219	VRNFLAsQVPF	0.114	0.013	-1.33	-0.401	-	O08756	3-hydroxyacyl-CoA dehydrogenase type-2	Hsd17b10
225	SQVPFPsRLGD	0.059	-0.39	-1.521	-0.617	-	O08756	3-hydroxyacyl-CoA dehydrogenase type-2	Hsd17b10
239	YAHLVQtIIEN	0.1	-0.116	-1.084	-0.367	-	O08756	3-hydroxyacyl-CoA dehydrogenase type-2	Hsd17b10
3	#NAME?	0.183	-0.364	-0.916	-0.366	-	O54950	5'-AMP-activated protein kinase subunit gamma-1	Prkag1
8	ESVAAEsSPAL	0.51	0.451	-0.06	0.3	-	O54950	5'-AMP-activated protein kinase subunit gamma-1	Prkag1
9	SVAAESsPALE	0.025	-0.609	-1.988	-0.857	-	O54950	5'-AMP-activated protein kinase subunit gamma-1	Prkag1
20	NEHFQEtPESN	0.03	-0.466	-2.2	-0.878	-	O54950	5'-AMP-activated protein kinase subunit gamma-1	Prkag1
23	FQETPEsNNSV	0.084	-0.203	-1.372	-0.497	-	O54950	5'-AMP-activated protein kinase subunit gamma-1	Prkag1
26	TPESNNsVYTS	0.154	-0.162	-0.999	-0.336	-	O54950	5'-AMP-activated protein kinase subunit gamma-1	Prkag1
29	SNNSVYtSFMK	0.066	-0.325	-1.467	-0.575	-	O54950	5'-AMP-activated protein kinase subunit gamma-1	Prkag1
30	NNSVYTsFMKS	0.113	-0.136	-0.982	-0.335	-	O54950	5'-AMP-activated protein kinase subunit gamma-1	Prkag1
34	YTSFMKsHRCY	0.46	-0.011	-0.365	0.028	-	O54950	5'-AMP-activated protein kinase subunit gamma-1	Prkag1
43	CYDLIPtSSKL	0.107	-0.139	-1.061	-0.364	-	O54950	5'-AMP-activated protein kinase subunit gamma-1	Prkag1
44	YDLIPTsSKLV	0.059	-0.238	-1.287	-0.489	-	O54950	5'-AMP-activated protein kinase subunit gamma-1	Prkag1
45	DLIPTSsKLVV	0.11	-0.027	-1.317	-0.411	-	O54950	5'-AMP-activated protein kinase subunit gamma-1	Prkag1
52	KLVVFDtSLQV	0.095	-0.198	-1.651	-0.585	-	O54950	5'-AMP-activated protein kinase subunit gamma-1	Prkag1
53	LVVFDTsLQVK	0.264	0.038	-0.415	-0.038	-	O54950	5'-AMP-activated protein kinase subunit gamma-1	Prkag1
65	AFFALVtNGVR	0.349	-0.055	-0.691	-0.132	-	O54950	5'-AMP-activated protein kinase subunit gamma-1	Prkag1
76	AAPLWDsKKQS	0.093	-0.302	-1.367	-0.526	-	O54950	5'-AMP-activated protein kinase subunit gamma-1	Prkag1
80	WDSKKQsFVGM	0.185	-0.158	-0.578	-0.183	-	O54950	5'-AMP-activated protein kinase subunit gamma-1	Prkag1
86	SFVGMLtITDF	0.093	-0.199	-1.013	-0.373	-	O54950	5'-AMP-activated protein kinase subunit gamma-1	Prkag1
88	VGMLTItDFIN	0.206	0.038	-0.786	-0.181	-	O54950	5'-AMP-activated protein kinase subunit gamma-1	Prkag1
100	LHRYYKsALVQ	0.383	0.298	-0.539	0.047	-	O54950	5'-AMP-activated protein kinase subunit gamma-1	Prkag1
115	EEHKIEtWREV	0.18	-0.061	-1.125	-0.335	-	O54950	5'-AMP-activated protein kinase subunit gamma-1	Prkag1
124	EVYLQDsFKPL	0.068	-0.11	-1.176	-0.406	-	O54950	5'-AMP-activated protein kinase subunit gamma-1	Prkag1
132	KPLVCIsPNAS	0.109	-0.332	-1.052	-0.425	-	O54950	5'-AMP-activated protein kinase subunit gamma-1	Prkag1
136	CISPNAsLFDA	0.66	0.177	0.313	0.383	-	O54950	5'-AMP-activated protein kinase subunit gamma-1	Prkag1
142	SLFDAVsSLIR	0.386	0.05	-0.718	-0.094	-	O54950	5'-AMP-activated protein kinase subunit gamma-1	Prkag1
143	LFDAVSsLIRN	0.201	-0.118	-0.719	-0.212	-	O54950	5'-AMP-activated protein kinase subunit gamma-1	Prkag1
159	PVIDPEsGNTL	0.121	-0.117	-0.98	-0.325	-	O54950	5'-AMP-activated protein kinase subunit gamma-1	Prkag1
162	DPESGNtLYIL	0.324	-0.036	-0.714	-0.142	-	O54950	5'-AMP-activated protein kinase subunit gamma-1	Prkag1
167	NTLYILtHKRI	0.23	-0.094	-0.545	-0.137	-	O54950	5'-AMP-activated protein kinase subunit gamma-1	Prkag1
180	FLKLFItEFPK	0.461	0.14	-0.265	0.112	-	O54950	5'-AMP-activated protein kinase subunit gamma-1	Prkag1
189	PKPEFMsKSLQ	0.161	-0.006	-0.979	-0.275	-	O54950	5'-AMP-activated protein kinase subunit gamma-1	Prkag1
191	PEFMSKsLQEL	0.753	0.397	0.54	0.563	-	O54950	5'-AMP-activated protein kinase subunit gamma-1	Prkag1
199	QELQIGtYANI	0.111	-0.163	-0.984	-0.345	-	O54950	5'-AMP-activated protein kinase subunit gamma-1	Prkag1
208	NIAMVRtTTPV	0.19	-0.11	-1.164	-0.361	-	O54950	5'-AMP-activated protein kinase subunit gamma-1	Prkag1
209	IAMVRTtTPVY	0.663	0.625	0.179	0.489	-	O54950	5'-AMP-activated protein kinase subunit gamma-1	Prkag1
210	AMVRTTtPVYV	0.194	0.612	-0.746	0.02	-	O54950	5'-AMP-activated protein kinase subunit gamma-1	Prkag1
225	FVQHRVsALPV	0.377	0.201	-0.704	-0.042	-	O54950	5'-AMP-activated protein kinase subunit gamma-1	Prkag1
241	RVVDIYsKFDV	0.303	0.166	-0.452	0.006	-	O54950	5'-AMP-activated protein kinase subunit gamma-1	Prkag1
253	NLAAEKtYNNL	0.394	0.12	-0.264	0.083	-	O54950	5'-AMP-activated protein kinase subunit gamma-1	Prkag1
260	YNNLDVsVTKA	0.182	-0.212	-0.97	-0.333	-	O54950	5'-AMP-activated protein kinase subunit gamma-1	Prkag1
262	NLDVSVtKALQ	0.386	0.141	-0.335	0.064	-	O54950	5'-AMP-activated protein kinase subunit gamma-1	Prkag1
269	KALQHRsHYFE	0.139	-0.172	-1.143	-0.392	-	O54950	5'-AMP-activated protein kinase subunit gamma-1	Prkag1
283	KCYLHEtLETI	0.412	0.097	-0.551	-0.014	-	O54950	5'-AMP-activated protein kinase subunit gamma-1	Prkag1
286	LHETLEtIINR	0.07	-0.188	-1.537	-0.551	-	O54950	5'-AMP-activated protein kinase subunit gamma-1	Prkag1
313	VVKGIVsLSDI	0.536	0.131	0.273	0.313	-	O54950	5'-AMP-activated protein kinase subunit gamma-1	Prkag1
315	KGIVSLsDILQ	0.124	0.084	-0.872	-0.221	-	O54950	5'-AMP-activated protein kinase subunit gamma-1	Prkag1
324	LQALVLtGGEK	0.132	-0.148	-0.781	-0.266	-	O54950	5'-AMP-activated protein kinase subunit gamma-1	Prkag1
16	HCKEAPsTASS	0.116	-0.05	-1.106	-0.347	-	O70622	Reticulon-2	Rtn2
17	CKEAPStASST	0.092	-0.246	-1.077	-0.41	-	O70622	Reticulon-2	Rtn2
19	EAPSTAsSTPD	0.075	-0.24	-1.336	-0.5	-	O70622	Reticulon-2	Rtn2
20	APSTASsTPDS	0.479	0.354	-0.342	0.164	-	O70622	Reticulon-2	Rtn2
21	PSTASStPDST	0.084	-0.298	-0.97	-0.395	-	O70622	Reticulon-2	Rtn2
24	ASSTPDsTEGG	0.102	-0.424	-1.39	-0.57	-	O70622	Reticulon-2	Rtn2
25	SSTPDStEGGN	0.108	-0.212	-1.055	-0.387	-	O70622	Reticulon-2	Rtn2
32	EGGNDDsDFRE	0.087	-0.29	-1.339	-0.514	-	O70622	Reticulon-2	Rtn2
39	DFRELHtAREF	0.439	0.266	-0.554	0.05	-	O70622	Reticulon-2	Rtn2
44	HTAREFsEDEE	0.751	0.985	0.632	0.789	-	O70622	Reticulon-2	Rtn2
51	EDEEEEtTSQD	0.045	-0.356	-1.635	-0.648	-	O70622	Reticulon-2	Rtn2
52	DEEEETtSQDW	0.169	-0.104	-1.183	-0.373	-	O70622	Reticulon-2	Rtn2
53	EEEETTsQDWG	0.083	-0.076	-1.175	-0.389	-	O70622	Reticulon-2	Rtn2
58	TSQDWGtPREL	0.087	-0.391	-1.363	-0.556	-	O70622	Reticulon-2	Rtn2
63	GTPRELtFSYI	0.539	0.751	-0.08	0.403	-	O70622	Reticulon-2	Rtn2
65	PRELTFsYIAF	0.15	0.268	-0.449	-0.01	-	O70622	Reticulon-2	Rtn2
75	FDGVVGsGGRR	0.064	-0.258	-1.477	-0.557	-	O70622	Reticulon-2	Rtn2
81	SGGRRDsVVRR	0.522	0.762	-0.09	0.398	-	O70622	Reticulon-2	Rtn2
92	PRPQGRsVSEP	0.071	-0.019	-1.276	-0.408	-	O70622	Reticulon-2	Rtn2
94	PQGRSVsEPRD	0.954	1.587	1.82	1.454	-	O70622	Reticulon-2	Rtn2
103	RDPPQQsGLGD	0.047	-0.306	-1.423	-0.561	-	O70622	Reticulon-2	Rtn2
108	QSGLGDsLESI	0.088	-0.195	-1.139	-0.415	-	O70622	Reticulon-2	Rtn2
111	LGDSLEsIPSL	0.146	0.195	-0.774	-0.144	-	O70622	Reticulon-2	Rtn2
114	SLESIPsLSQS	0.181	-0.151	-0.71	-0.227	-	O70622	Reticulon-2	Rtn2
116	ESIPSLsQSPE	0.061	-0.183	-1.333	-0.485	-	O70622	Reticulon-2	Rtn2
118	IPSLSQsPEPG	0.143	-0.234	-0.9	-0.33	-	O70622	Reticulon-2	Rtn2
153	LGWVVRsAGSG	0.083	0.047	-1.229	-0.366	-	O70622	Reticulon-2	Rtn2
156	VVRSAGsGEDS	0.244	0.087	-0.708	-0.126	-	O70622	Reticulon-2	Rtn2
160	AGSGEDsATSS	0.078	-0.302	-1.667	-0.631	-	O70622	Reticulon-2	Rtn2
162	SGEDSAtSSST	0.108	-0.069	-1.114	-0.359	-	O70622	Reticulon-2	Rtn2
163	GEDSATsSSTP	0.094	-0.231	-1.399	-0.512	-	O70622	Reticulon-2	Rtn2
164	EDSATSsSTPL	0.036	-0.32	-1.522	-0.602	-	O70622	Reticulon-2	Rtn2
165	DSATSSsTPLE	0.586	0.477	0.02	0.361	-	O70622	Reticulon-2	Rtn2
166	SATSSStPLEN	0.064	-0.327	-1.49	-0.585	-	O70622	Reticulon-2	Rtn2
179	PDGLEAsEAGE	0.107	-0.199	-1.263	-0.451	-	O70622	Reticulon-2	Rtn2
185	SEAGEEtNLEL	0.06	-0.227	-1.743	-0.636	-	O70622	Reticulon-2	Rtn2
194	ELRLAQsLHLQ	0.72	0.475	0.296	0.497	-	O70622	Reticulon-2	Rtn2
203	LQLEVLtPQLS	0.029	-0.429	-1.562	-0.654	-	O70622	Reticulon-2	Rtn2
207	VLTPQLsPSSG	0.026	-0.48	-1.764	-0.739	-	O70622	Reticulon-2	Rtn2
209	TPQLSPsSGTP	0.21	0.023	-0.746	-0.171	-	O70622	Reticulon-2	Rtn2
210	PQLSPSsGTPQ	0.053	-0.421	-1.292	-0.553	-	O70622	Reticulon-2	Rtn2
212	LSPSSGtPQAH	0.056	-0.414	-1.376	-0.578	-	O70622	Reticulon-2	Rtn2
217	GTPQAHtPSPQ	0.122	-0.325	-1.282	-0.495	-	O70622	Reticulon-2	Rtn2
219	PQAHTPsPQRS	0.05	-0.468	-1.371	-0.596	-	O70622	Reticulon-2	Rtn2
223	TPSPQRsQDSN	0.037	-0.267	-1.867	-0.699	-	O70622	Reticulon-2	Rtn2
226	PQRSQDsNSGP	0.09	-0.152	-1.347	-0.47	-	O70622	Reticulon-2	Rtn2
228	RSQDSNsGPDD	0.894	0.817	0.774	0.828	-	O70622	Reticulon-2	Rtn2
252	LEQEPItAQCL	0.134	0.019	-0.976	-0.274	-	O70622	Reticulon-2	Rtn2
258	TAQCLDsTDQS	0.134	-0.225	-1.315	-0.469	-	O70622	Reticulon-2	Rtn2
259	AQCLDStDQSE	0.077	-0.231	-1.444	-0.533	-	O70622	Reticulon-2	Rtn2
262	LDSTDQsEFML	0.104	-0.148	-0.979	-0.341	-	O70622	Reticulon-2	Rtn2
281	LLYWKDtRTSG	0.119	-0.254	-1.167	-0.434	-	O70622	Reticulon-2	Rtn2
283	YWKDTRtSGAV	0.212	0.152	-0.857	-0.164	-	O70622	Reticulon-2	Rtn2
284	WKDTRTsGAVF	0.251	0.005	-0.564	-0.103	-	O70622	Reticulon-2	Rtn2
289	TSGAVFtGLMA	0.07	-0.319	-1.35	-0.533	-	O70622	Reticulon-2	Rtn2
294	FTGLMAsLLCL	0.318	0.135	-0.624	-0.057	-	O70622	Reticulon-2	Rtn2
302	LCLLHFsIVSV	0.14	0.008	-1.105	-0.319	-	O70622	Reticulon-2	Rtn2
305	LHFSIVsVAAH	0.151	-0.178	-1.06	-0.362	-	O70622	Reticulon-2	Rtn2
318	LLGLCAtISLR	0.226	0.013	-0.667	-0.143	-	O70622	Reticulon-2	Rtn2
320	GLCATIsLRVY	0.637	0.214	-0.057	0.265	-	O70622	Reticulon-2	Rtn2
337	VHRGDGtNPFQ	0.307	0.372	-0.819	-0.047	-	O70622	Reticulon-2	Rtn2
349	YLDMDLtLTRE	0.299	-0.121	-0.7	-0.174	-	O70622	Reticulon-2	Rtn2
351	DMDLTLtREQT	0.053	-0.166	-1.606	-0.573	-	O70622	Reticulon-2	Rtn2
355	TLTREQtERLS	0.692	0.901	0.443	0.679	-	O70622	Reticulon-2	Rtn2
359	EQTERLsQQIA	0.125	-0.044	-0.912	-0.277	-	O70622	Reticulon-2	Rtn2
364	LSQQIAsHVVS	0.238	0.004	-0.548	-0.102	-	O70622	Reticulon-2	Rtn2
368	IASHVVsTATQ	0.196	-0.292	-1.01	-0.369	-	O70622	Reticulon-2	Rtn2
369	ASHVVStATQL	0.09	-0.238	-1.497	-0.548	-	O70622	Reticulon-2	Rtn2
371	HVVSTAtQLRH	0.044	-0.248	-1.838	-0.68	-	O70622	Reticulon-2	Rtn2
385	VEDLVDsLKLA	0.201	-0.152	-0.999	-0.317	-	O70622	Reticulon-2	Rtn2
396	LLFYILtFVGA	0.265	0.07	-0.144	0.064	-	O70622	Reticulon-2	Rtn2
406	AIFNGLtLVIL	0.167	0.036	-0.673	-0.157	-	O70622	Reticulon-2	Rtn2
417	GVVALFtVPLL	0.499	0.546	-0.034	0.337	-	O70622	Reticulon-2	Rtn2
437	QYVGLVtNQLS	0.158	-0.092	-1.052	-0.329	-	O70622	Reticulon-2	Rtn2
441	LVTNQLsHIKA	0.05	-0.142	-1.028	-0.374	-	O70622	Reticulon-2	Rtn2
454	RAKIPGtGTLA	0.124	-0.233	-1.02	-0.376	-	O70622	Reticulon-2	Rtn2
456	KIPGTGtLAPT	0.06	-0.175	-1.185	-0.433	-	O70622	Reticulon-2	Rtn2
460	TGTLAPtASVS	0.13	-0.089	-1.098	-0.352	-	O70622	Reticulon-2	Rtn2
462	TLAPTAsVSGS	0.123	-0.077	-0.827	-0.26	-	O70622	Reticulon-2	Rtn2
464	APTASVsGSKA	0.247	-0.078	-0.615	-0.149	-	O70622	Reticulon-2	Rtn2
466	TASVSGsKAKA	0.1	-0.152	-1.09	-0.38	-	O70622	Reticulon-2	Rtn2
2	#NAME?	0.16	-0.331	-0.857	-0.343	-	P01865	Ig gamma-2A chain C region, membrane-bound form	Igh-1a
3	#NAME?	0.373	0.19	-0.581	-0.006	-	P01865	Ig gamma-2A chain C region, membrane-bound form	Igh-1a
6	#NAME?	0.369	-0.051	-0.397	-0.026	-	P01865	Ig gamma-2A chain C region, membrane-bound form	Igh-1a
17	APVCGDtTGSS	0.06	-0.318	-1.722	-0.66	-	P01865	Ig gamma-2A chain C region, membrane-bound form	Igh-1a
18	PVCGDTtGSSV	0.056	-0.207	-1.474	-0.541	-	P01865	Ig gamma-2A chain C region, membrane-bound form	Igh-1a
20	CGDTTGsSVTL	0.071	-0.152	-1.228	-0.436	-	P01865	Ig gamma-2A chain C region, membrane-bound form	Igh-1a
21	GDTTGSsVTLG	0.095	-0.217	-1.248	-0.456	-	P01865	Ig gamma-2A chain C region, membrane-bound form	Igh-1a
23	TTGSSVtLGCL	0.63	0.296	0.116	0.347	-	P01865	Ig gamma-2A chain C region, membrane-bound form	Igh-1a
37	YFPEPVtLTWN	0.291	-0.039	-0.396	-0.048	-	P01865	Ig gamma-2A chain C region, membrane-bound form	Igh-1a
39	PEPVTLtWNSG	0.035	-0.071	-1.472	-0.503	-	P01865	Ig gamma-2A chain C region, membrane-bound form	Igh-1a
42	VTLTWNsGSLS	0.147	-0.153	-1.154	-0.387	-	P01865	Ig gamma-2A chain C region, membrane-bound form	Igh-1a
44	LTWNSGsLSSG	0.154	0.171	-0.549	-0.075	-	P01865	Ig gamma-2A chain C region, membrane-bound form	Igh-1a
46	WNSGSLsSGVH	0.114	-0.096	-0.85	-0.277	-	P01865	Ig gamma-2A chain C region, membrane-bound form	Igh-1a
47	NSGSLSsGVHT	0.028	-0.462	-1.745	-0.727	-	P01865	Ig gamma-2A chain C region, membrane-bound form	Igh-1a
51	LSSGVHtFPAV	0.725	0.632	0.327	0.561	-	P01865	Ig gamma-2A chain C region, membrane-bound form	Igh-1a
58	FPAVLQsDLYT	0.065	-0.14	-1.429	-0.501	-	P01865	Ig gamma-2A chain C region, membrane-bound form	Igh-1a
62	LQSDLYtLSSS	0.068	-0.093	-1.03	-0.352	-	P01865	Ig gamma-2A chain C region, membrane-bound form	Igh-1a
64	SDLYTLsSSVT	0.02	-0.3	-1.743	-0.674	-	P01865	Ig gamma-2A chain C region, membrane-bound form	Igh-1a
65	DLYTLSsSVTV	0.111	-0.161	-1.535	-0.528	-	P01865	Ig gamma-2A chain C region, membrane-bound form	Igh-1a
66	LYTLSSsVTVT	0.289	0.14	-0.413	0.005	-	P01865	Ig gamma-2A chain C region, membrane-bound form	Igh-1a
68	TLSSSVtVTSS	0.371	0.098	-0.397	0.024	-	P01865	Ig gamma-2A chain C region, membrane-bound form	Igh-1a
70	SSSVTVtSSTW	0.047	-0.296	-1.631	-0.626	-	P01865	Ig gamma-2A chain C region, membrane-bound form	Igh-1a
71	SSVTVTsSTWP	0.077	-0.292	-1.499	-0.571	-	P01865	Ig gamma-2A chain C region, membrane-bound form	Igh-1a
72	SVTVTSsTWPS	0.035	-0.205	-1.643	-0.604	-	P01865	Ig gamma-2A chain C region, membrane-bound form	Igh-1a
73	VTVTSStWPSQ	0.377	0.517	-0.323	0.19	-	P01865	Ig gamma-2A chain C region, membrane-bound form	Igh-1a
76	TSSTWPsQSIT	0.078	-0.376	-1.512	-0.603	-	P01865	Ig gamma-2A chain C region, membrane-bound form	Igh-1a
78	STWPSQsITCN	0.201	0.184	-0.739	-0.118	-	P01865	Ig gamma-2A chain C region, membrane-bound form	Igh-1a
80	WPSQSItCNVA	0.472	0.198	0.037	0.236	-	P01865	Ig gamma-2A chain C region, membrane-bound form	Igh-1a
88	NVAHPAsSTKV	0.132	-0.182	-1.148	-0.399	-	P01865	Ig gamma-2A chain C region, membrane-bound form	Igh-1a
89	VAHPASsTKVD	0.092	-0.198	-1.156	-0.42	-	P01865	Ig gamma-2A chain C region, membrane-bound form	Igh-1a
90	AHPASStKVDK	0.195	-0.023	-0.922	-0.25	-	P01865	Ig gamma-2A chain C region, membrane-bound form	Igh-1a
102	IEPRGPtIKPC	0.177	0.423	-0.624	-0.008	-	P01865	Ig gamma-2A chain C region, membrane-bound form	Igh-1a
121	NLLGGPsVFIF	0.173	-0.07	-0.654	-0.184	-	P01865	Ig gamma-2A chain C region, membrane-bound form	Igh-1a
136	KDVLMIsLSPI	0.173	-0.192	-0.784	-0.267	-	P01865	Ig gamma-2A chain C region, membrane-bound form	Igh-1a
138	VLMISLsPIVT	0.094	-0.061	-0.779	-0.248	-	P01865	Ig gamma-2A chain C region, membrane-bound form	Igh-1a
142	SLSPIVtCVVV	0.264	0.035	-0.831	-0.177	-	P01865	Ig gamma-2A chain C region, membrane-bound form	Igh-1a
149	CVVVDVsEDDP	0.282	0.061	-0.471	-0.043	-	P01865	Ig gamma-2A chain C region, membrane-bound form	Igh-1a
158	DPDVQIsWFVN	0.106	-0.024	-1.324	-0.414	-	P01865	Ig gamma-2A chain C region, membrane-bound form	Igh-1a
168	NNVEVHtAQTQ	0.147	-0.042	-1.129	-0.341	-	P01865	Ig gamma-2A chain C region, membrane-bound form	Igh-1a
171	EVHTAQtQTHR	0.112	-0.14	-1.123	-0.384	-	P01865	Ig gamma-2A chain C region, membrane-bound form	Igh-1a
173	HTAQTQtHRED	0.35	0.05	-0.213	0.062	-	P01865	Ig gamma-2A chain C region, membrane-bound form	Igh-1a
180	HREDYNsTLRV	0.291	0.187	-1.014	-0.179	-	P01865	Ig gamma-2A chain C region, membrane-bound form	Igh-1a
181	REDYNStLRVV	0.294	-0.019	-0.746	-0.157	-	P01865	Ig gamma-2A chain C region, membrane-bound form	Igh-1a
186	STLRVVsALPI	0.671	0.774	0.099	0.515	-	P01865	Ig gamma-2A chain C region, membrane-bound form	Igh-1a
197	QHQDWMsGKEF	0.201	0.098	-0.87	-0.19	-	P01865	Ig gamma-2A chain C region, membrane-bound form	Igh-1a
217	PAPIERtISKP	0.026	-0.367	-2.027	-0.79	-	P01865	Ig gamma-2A chain C region, membrane-bound form	Igh-1a
219	PIERTIsKPKG	0.9	1.429	1.259	1.196	-	P01865	Ig gamma-2A chain C region, membrane-bound form	Igh-1a
224	ISKPKGsVRAP	0.111	-0.292	-0.918	-0.366	-	P01865	Ig gamma-2A chain C region, membrane-bound form	Igh-1a
241	PPEEEMtKKQV	0.188	-0.05	-0.995	-0.286	-	P01865	Ig gamma-2A chain C region, membrane-bound form	Igh-1a
246	MTKKQVtLTCM	0.756	0.237	0.141	0.378	-	P01865	Ig gamma-2A chain C region, membrane-bound form	Igh-1a
248	KKQVTLtCMVT	0.112	0.084	-1.025	-0.276	-	P01865	Ig gamma-2A chain C region, membrane-bound form	Igh-1a
252	TLTCMVtDFMP	0.405	-0.093	-0.57	-0.086	-	P01865	Ig gamma-2A chain C region, membrane-bound form	Igh-1a
264	DIYVEWtNNGK	0.163	-0.187	-1.135	-0.386	-	P01865	Ig gamma-2A chain C region, membrane-bound form	Igh-1a
269	WTNNGKtELNY	0.17	0.007	-0.885	-0.236	-	P01865	Ig gamma-2A chain C region, membrane-bound form	Igh-1a
276	ELNYKNtEPVL	0.653	0.713	0.274	0.547	-	P01865	Ig gamma-2A chain C region, membrane-bound form	Igh-1a
282	TEPVLDsDGSY	0.064	-0.237	-1.798	-0.657	-	P01865	Ig gamma-2A chain C region, membrane-bound form	Igh-1a
285	VLDSDGsYFMY	0.109	-0.25	-1.288	-0.476	-	P01865	Ig gamma-2A chain C region, membrane-bound form	Igh-1a
290	GSYFMYsKLRV	0.185	-0.121	-1.042	-0.326	-	P01865	Ig gamma-2A chain C region, membrane-bound form	Igh-1a
304	NWVERNsYSCS	0.137	0.091	-1.154	-0.309	-	P01865	Ig gamma-2A chain C region, membrane-bound form	Igh-1a
306	VERNSYsCSVV	0.411	0.491	-0.261	0.214	-	P01865	Ig gamma-2A chain C region, membrane-bound form	Igh-1a
308	RNSYSCsVVHE	0.308	0.08	-0.409	-0.007	-	P01865	Ig gamma-2A chain C region, membrane-bound form	Igh-1a
319	GLHNHHtTKSF	0.178	0.129	-0.707	-0.134	-	P01865	Ig gamma-2A chain C region, membrane-bound form	Igh-1a
320	LHNHHTtKSFS	0.068	-0.216	-1.533	-0.56	-	P01865	Ig gamma-2A chain C region, membrane-bound form	Igh-1a
322	NHHTTKsFSRT	0.101	-0.128	-1.284	-0.437	-	P01865	Ig gamma-2A chain C region, membrane-bound form	Igh-1a
324	HTTKSFsRTPG	0.531	0.181	-0.068	0.215	-	P01865	Ig gamma-2A chain C region, membrane-bound form	Igh-1a
326	TKSFSRtPGLD	0.358	0.014	-0.392	-0.007	-	P01865	Ig gamma-2A chain C region, membrane-bound form	Igh-1a
348	ELDGLWtTITI	0.159	-0.063	-0.703	-0.202	-	P01865	Ig gamma-2A chain C region, membrane-bound form	Igh-1a
349	LDGLWTtITIF	0.085	-0.204	-1.099	-0.406	-	P01865	Ig gamma-2A chain C region, membrane-bound form	Igh-1a
351	GLWTTItIFIS	0.243	0.162	-0.622	-0.072	-	P01865	Ig gamma-2A chain C region, membrane-bound form	Igh-1a
355	TITIFIsLFLL	0.396	0.178	-0.21	0.121	-	P01865	Ig gamma-2A chain C region, membrane-bound form	Igh-1a
360	ISLFLLsVCYS	0.072	-0.314	-1.421	-0.554	-	P01865	Ig gamma-2A chain C region, membrane-bound form	Igh-1a
364	LLSVCYsASVT	0.175	0.058	-0.723	-0.163	-	P01865	Ig gamma-2A chain C region, membrane-bound form	Igh-1a
366	SVCYSAsVTLF	0.329	0.203	-0.423	0.037	-	P01865	Ig gamma-2A chain C region, membrane-bound form	Igh-1a
368	CYSASVtLFKV	0.75	0.299	0.287	0.445	-	P01865	Ig gamma-2A chain C region, membrane-bound form	Igh-1a
377	KVKWIFsSVVE	0.183	-0.058	-0.65	-0.175	-	P01865	Ig gamma-2A chain C region, membrane-bound form	Igh-1a
378	VKWIFSsVVEL	0.171	0.121	-0.813	-0.173	-	P01865	Ig gamma-2A chain C region, membrane-bound form	Igh-1a
385	VVELKQtISPD	0.068	-0.265	-1.201	-0.466	-	P01865	Ig gamma-2A chain C region, membrane-bound form	Igh-1a
387	ELKQTIsPDYR	0.204	-0.158	-0.561	-0.172	-	P01865	Ig gamma-2A chain C region, membrane-bound form	Igh-1a
6	#NAME?	0.109	-0.173	-0.741	-0.268	-	P11983	T-complex protein 1 subunit alpha	Tcp1
12	SVFGDRsTGEA	0.108	-0.107	-1.184	-0.394	-	P11983	T-complex protein 1 subunit alpha	Tcp1
13	VFGDRStGEAV	0.177	0.032	-0.921	-0.238	-	P11983	T-complex protein 1 subunit alpha	Tcp1
19	TGEAVRsQNVM	0.136	-0.168	-1.099	-0.377	-	P11983	T-complex protein 1 subunit alpha	Tcp1
27	NVMAAAsIANI	0.275	0.09	-0.55	-0.062	-	P11983	T-complex protein 1 subunit alpha	Tcp1
34	IANIVKsSFGP	0.167	-0.173	-0.855	-0.287	-	P11983	T-complex protein 1 subunit alpha	Tcp1
35	ANIVKSsFGPV	0.073	-0.218	-1.392	-0.512	-	P11983	T-complex protein 1 subunit alpha	Tcp1
53	DDIGDVtITND	0.214	-0.143	-1.003	-0.311	-	P11983	T-complex protein 1 subunit alpha	Tcp1
55	IGDVTItNDGA	0.137	-0.164	-0.864	-0.297	-	P11983	T-complex protein 1 subunit alpha	Tcp1
60	ITNDGAtILKL	0.093	-0.165	-1.352	-0.475	-	P11983	T-complex protein 1 subunit alpha	Tcp1
90	KEVGDGtTSVV	0.044	-0.276	-1.913	-0.715	-	P11983	T-complex protein 1 subunit alpha	Tcp1
91	EVGDGTtSVVI	0.064	-0.083	-1.19	-0.403	-	P11983	T-complex protein 1 subunit alpha	Tcp1
92	VGDGTTsVVII	0.157	-0.028	-0.665	-0.178	-	P11983	T-complex protein 1 subunit alpha	Tcp1
115	KQKIHPtSVIS	0.14	-0.118	-1.011	-0.33	-	P11983	T-complex protein 1 subunit alpha	Tcp1
116	QKIHPTsVISG	0.133	-0.086	-0.686	-0.213	-	P11983	T-complex protein 1 subunit alpha	Tcp1
119	HPTSVIsGYRL	0.138	-0.156	-0.99	-0.336	-	P11983	T-complex protein 1 subunit alpha	Tcp1
140	ENLIINtDELG	0.166	-0.025	-0.793	-0.217	-	P11983	T-complex protein 1 subunit alpha	Tcp1
154	LINAAKtSMSS	0.175	0.014	-0.783	-0.198	-	P11983	T-complex protein 1 subunit alpha	Tcp1
155	INAAKTsMSSK	0.052	-0.27	-1.251	-0.489	-	P11983	T-complex protein 1 subunit alpha	Tcp1
157	AAKTSMsSKII	0.564	0.243	-0.032	0.259	-	P11983	T-complex protein 1 subunit alpha	Tcp1
158	AKTSMSsKIIG	0.208	-0.179	-0.661	-0.21	-	P11983	T-complex protein 1 subunit alpha	Tcp1
182	VLAVKYtDARG	0.151	-0.067	-0.924	-0.28	-	P11983	T-complex protein 1 subunit alpha	Tcp1
194	PRYPVNsVNIL	0.413	0.284	-0.292	0.135	-	P11983	T-complex protein 1 subunit alpha	Tcp1
204	LKAHGRsQIES	0.101	-0.137	-1.103	-0.379	-	P11983	T-complex protein 1 subunit alpha	Tcp1
208	GRSQIEsMLIN	0.28	0.25	-0.72	-0.063	-	P11983	T-complex protein 1 subunit alpha	Tcp1
222	LNCVVGsQGMP	0.058	-0.37	-1.713	-0.675	-	P11983	T-complex protein 1 subunit alpha	Tcp1
240	IACLDFsLQKT	0.285	-0.045	-0.539	-0.1	-	P11983	T-complex protein 1 subunit alpha	Tcp1
244	DFSLQKtKMKL	0.236	0.009	-0.694	-0.15	-	P11983	T-complex protein 1 subunit alpha	Tcp1
255	GVQVVItDPEK	0.679	0.538	-0.04	0.393	-	P11983	T-complex protein 1 subunit alpha	Tcp1
268	QIRQREsDITK	0.582	0.343	-0.074	0.283	-	P11983	T-complex protein 1 subunit alpha	Tcp1
271	QRESDItKERI	0.239	0.018	-0.63	-0.124	-	P11983	T-complex protein 1 subunit alpha	Tcp1
281	IQKILAtGANV	0.156	-0.088	-1.113	-0.349	-	P11983	T-complex protein 1 subunit alpha	Tcp1
288	GANVILtTGGI	0.17	-0.086	-0.764	-0.226	-	P11983	T-complex protein 1 subunit alpha	Tcp1
289	ANVILTtGGID	0.15	-0.176	-0.955	-0.327	-	P11983	T-complex protein 1 subunit alpha	Tcp1
323	KHVAKAsGASI	0.075	-0.236	-1.501	-0.554	-	P11983	T-complex protein 1 subunit alpha	Tcp1
326	AKASGAsILST	0.065	-0.26	-1.248	-0.481	-	P11983	T-complex protein 1 subunit alpha	Tcp1
329	SGASILsTLAN	0.066	-0.179	-1.147	-0.42	-	P11983	T-complex protein 1 subunit alpha	Tcp1
330	GASILStLANL	0.143	-0.054	-1.097	-0.336	-	P11983	T-complex protein 1 subunit alpha	Tcp1
339	NLEGEEtFEVT	0.23	-0.001	-0.744	-0.172	-	P11983	T-complex protein 1 subunit alpha	Tcp1
343	EETFEVtMLGQ	0.166	-0.089	-1.149	-0.358	-	P11983	T-complex protein 1 subunit alpha	Tcp1
367	LILIKNtKART	0.127	-0.146	-1.054	-0.358	-	P11983	T-complex protein 1 subunit alpha	Tcp1
371	KNTKARtSASI	0.158	-0.116	-0.91	-0.289	-	P11983	T-complex protein 1 subunit alpha	Tcp1
372	NTKARTsASII	0.522	0.136	-0.29	0.122	-	P11983	T-complex protein 1 subunit alpha	Tcp1
374	KARTSAsIILR	0.487	0.346	-0.037	0.265	-	P11983	T-complex protein 1 subunit alpha	Tcp1
391	CDEMERsLHDA	0.376	-0.052	-0.484	-0.053	-	P11983	T-complex protein 1 subunit alpha	Tcp1
407	RVLELKsVVPG	0.124	-0.036	-0.884	-0.265	-	P11983	T-complex protein 1 subunit alpha	Tcp1
420	AVEAALsIYLE	0.119	-0.144	-0.984	-0.336	-	P11983	T-complex protein 1 subunit alpha	Tcp1
428	YLENYAtSMGS	0.262	-0.009	-0.514	-0.087	-	P11983	T-complex protein 1 subunit alpha	Tcp1
429	LENYATsMGSR	0.213	0.144	-0.656	-0.1	-	P11983	T-complex protein 1 subunit alpha	Tcp1
432	YATSMGsREQL	0.08	-0.346	-1.247	-0.504	-	P11983	T-complex protein 1 subunit alpha	Tcp1
444	IAEFARsLLVI	0.463	0.138	-0.241	0.12	-	P11983	T-complex protein 1 subunit alpha	Tcp1
451	LLVIPNtLAVN	0.352	0.124	-0.395	0.027	-	P11983	T-complex protein 1 subunit alpha	Tcp1
460	VNAAQDsTDLV	0.107	-0.25	-1.352	-0.498	-	P11983	T-complex protein 1 subunit alpha	Tcp1
461	NAAQDStDLVA	0.12	-0.175	-1.068	-0.374	-	P11983	T-complex protein 1 subunit alpha	Tcp1
507	AGVFEPtIVKV	0.09	-0.244	-1.525	-0.56	-	P11983	T-complex protein 1 subunit alpha	Tcp1
513	TIVKVKsLKFA	0.458	0.103	-0.079	0.161	-	P11983	T-complex protein 1 subunit alpha	Tcp1
518	KSLKFAtEAAI	0.482	0.091	-0.244	0.109	-	P11983	T-complex protein 1 subunit alpha	Tcp1
523	ATEAAItILRI	0.287	-0.162	-0.77	-0.215	-	P11983	T-complex protein 1 subunit alpha	Tcp1
537	IKLHPEsKDDK	0.442	-0.073	-0.176	0.065	-	P11983	T-complex protein 1 subunit alpha	Tcp1
544	KDDKHGsYENA	0.103	-0.21	-1.383	-0.497	-	P11983	T-complex protein 1 subunit alpha	Tcp1
551	YENAVHsGALD	0.192	-0.045	-0.941	-0.264	-	P11983	T-complex protein 1 subunit alpha	Tcp1
3	#NAME?	0.331	-0.236	-0.57	-0.158	-	P12382	ATP-dependent 6-phosphofructokinase, liver type	Pfkl
12	LEKLRMsGAGK	0.322	0.053	-0.452	-0.026	-	P12382	ATP-dependent 6-phosphofructokinase, liver type	Pfkl
22	KAIGVLtSGGD	0.13	-0.159	-1.016	-0.349	-	P12382	ATP-dependent 6-phosphofructokinase, liver type	Pfkl
23	AIGVLTsGGDA	0.155	-0.059	-0.878	-0.261	-	P12382	ATP-dependent 6-phosphofructokinase, liver type	Pfkl
38	AAVRAVtRMGI	0.795	0.775	0.513	0.694	-	P12382	ATP-dependent 6-phosphofructokinase, liver type	Pfkl
72	KPANWLsVSNI	0.107	-0.07	-0.933	-0.299	-	P12382	ATP-dependent 6-phosphofructokinase, liver type	Pfkl
74	ANWLSVsNIIQ	0.276	0.088	-0.658	-0.098	-	P12382	ATP-dependent 6-phosphofructokinase, liver type	Pfkl
82	IIQLGGtIIGS	0.071	-0.175	-1.104	-0.403	-	P12382	ATP-dependent 6-phosphofructokinase, liver type	Pfkl
86	GGTIIGsARCK	0.166	-0.093	-0.875	-0.267	-	P12382	ATP-dependent 6-phosphofructokinase, liver type	Pfkl
93	ARCKAFtTREG	0.632	0.287	-0.137	0.261	-	P12382	ATP-dependent 6-phosphofructokinase, liver type	Pfkl
94	RCKAFTtREGR	0.292	-0.092	-0.753	-0.184	-	P12382	ATP-dependent 6-phosphofructokinase, liver type	Pfkl
111	LLQHGItNLCV	0.151	-0.007	-1.19	-0.349	-	P12382	ATP-dependent 6-phosphofructokinase, liver type	Pfkl
121	VIGGDGsLTGA	0.186	-0.128	-0.719	-0.22	-	P12382	ATP-dependent 6-phosphofructokinase, liver type	Pfkl
123	GGDGSLtGANI	0.239	0.115	-0.533	-0.06	-	P12382	ATP-dependent 6-phosphofructokinase, liver type	Pfkl
134	FRNEWGsLLEE	0.231	0.243	-0.781	-0.102	-	P12382	ATP-dependent 6-phosphofructokinase, liver type	Pfkl
146	VKEGKIsESTA	0.188	-0.107	-0.657	-0.192	-	P12382	ATP-dependent 6-phosphofructokinase, liver type	Pfkl
148	EGKISEsTAQN	0.238	0.074	-0.533	-0.074	-	P12382	ATP-dependent 6-phosphofructokinase, liver type	Pfkl
149	GKISEStAQNY	0.329	0.07	-1.024	-0.208	-	P12382	ATP-dependent 6-phosphofructokinase, liver type	Pfkl
157	QNYAHLtIAGL	0.059	-0.275	-1.106	-0.44	-	P12382	ATP-dependent 6-phosphofructokinase, liver type	Pfkl
164	IAGLVGsIDND	0.151	-0.138	-1.113	-0.367	-	P12382	ATP-dependent 6-phosphofructokinase, liver type	Pfkl
172	DNDFCGtDMTI	0.309	-0.121	-0.875	-0.229	-	P12382	ATP-dependent 6-phosphofructokinase, liver type	Pfkl
175	FCGTDMtIGTD	0.349	0.15	-0.49	0.003	-	P12382	ATP-dependent 6-phosphofructokinase, liver type	Pfkl
178	TDMTIGtDSAL	0.068	-0.14	-1.197	-0.423	-	P12382	ATP-dependent 6-phosphofructokinase, liver type	Pfkl
180	MTIGTDsALHR	0.101	-0.047	-1.245	-0.397	-	P12382	ATP-dependent 6-phosphofructokinase, liver type	Pfkl
193	EVIDAItTTAQ	0.253	0.049	-0.735	-0.144	-	P12382	ATP-dependent 6-phosphofructokinase, liver type	Pfkl
194	VIDAITtTAQS	0.121	-0.186	-0.944	-0.336	-	P12382	ATP-dependent 6-phosphofructokinase, liver type	Pfkl
195	IDAITTtAQSH	0.052	-0.206	-1.363	-0.506	-	P12382	ATP-dependent 6-phosphofructokinase, liver type	Pfkl
198	ITTTAQsHQRT	0.38	-0.089	-0.536	-0.082	-	P12382	ATP-dependent 6-phosphofructokinase, liver type	Pfkl
202	AQSHQRtFVLE	0.09	-0.122	-1.205	-0.412	-	P12382	ATP-dependent 6-phosphofructokinase, liver type	Pfkl
219	GYLALVsALAS	0.307	0.035	-0.754	-0.137	-	P12382	ATP-dependent 6-phosphofructokinase, liver type	Pfkl
223	LVSALAsGADW	0.124	-0.151	-1.034	-0.354	-	P12382	ATP-dependent 6-phosphofructokinase, liver type	Pfkl
250	CERLGEtRSRG	0.157	-0.113	-1.353	-0.437	-	P12382	ATP-dependent 6-phosphofructokinase, liver type	Pfkl
252	RLGETRsRGSR	0.087	-0.005	-1.28	-0.399	-	P12382	ATP-dependent 6-phosphofructokinase, liver type	Pfkl
255	ETRSRGsRLNI	0.321	0.173	-0.782	-0.096	-	P12382	ATP-dependent 6-phosphofructokinase, liver type	Pfkl
275	RHGKPIsSSYV	0.127	-0.198	-1.574	-0.548	-	P12382	ATP-dependent 6-phosphofructokinase, liver type	Pfkl
276	HGKPISsSYVK	0.093	-0.134	-0.779	-0.273	-	P12382	ATP-dependent 6-phosphofructokinase, liver type	Pfkl
277	GKPISSsYVKD	0.251	0.139	-0.565	-0.058	-	P12382	ATP-dependent 6-phosphofructokinase, liver type	Pfkl
291	QRLGFDtRVTV	0.116	-0.052	-1.366	-0.434	-	P12382	ATP-dependent 6-phosphofructokinase, liver type	Pfkl
294	GFDTRVtVLGH	0.357	-0.036	-0.674	-0.118	-	P12382	ATP-dependent 6-phosphofructokinase, liver type	Pfkl
304	HVQRGGtPSAF	0.118	0.507	-0.5	0.042	-	P12382	ATP-dependent 6-phosphofructokinase, liver type	Pfkl
306	QRGGTPsAFDR	0.175	0.232	-0.626	-0.073	-	P12382	ATP-dependent 6-phosphofructokinase, liver type	Pfkl
313	AFDRILsSKMG	0.358	0.637	-0.073	0.308	-	P12382	ATP-dependent 6-phosphofructokinase, liver type	Pfkl
314	FDRILSsKMGM	0.148	0.036	-0.815	-0.21	-	P12382	ATP-dependent 6-phosphofructokinase, liver type	Pfkl
328	MALLEAtPDTP	0.112	-0.35	-1.318	-0.519	-	P12382	ATP-dependent 6-phosphofructokinase, liver type	Pfkl
331	LEATPDtPACV	0.04	-0.559	-1.918	-0.812	-	P12382	ATP-dependent 6-phosphofructokinase, liver type	Pfkl
337	TPACVVsLSGN	0.373	-0.102	-0.538	-0.089	-	P12382	ATP-dependent 6-phosphofructokinase, liver type	Pfkl
339	ACVVSLsGNQS	0.171	0.046	-0.777	-0.187	-	P12382	ATP-dependent 6-phosphofructokinase, liver type	Pfkl
343	SLSGNQsVRLP	0.147	-0.111	-0.787	-0.25	-	P12382	ATP-dependent 6-phosphofructokinase, liver type	Pfkl
355	MECVQVtKDVQ	0.24	0.015	-0.905	-0.217	-	P12382	ATP-dependent 6-phosphofructokinase, liver type	Pfkl
377	IQLRGRsFENN	0.506	0.862	0.123	0.497	-	P12382	ATP-dependent 6-phosphofructokinase, liver type	Pfkl
394	LAHQKVsKEKS	0.101	-0.244	-1.13	-0.424	-	P12382	ATP-dependent 6-phosphofructokinase, liver type	Pfkl
398	KVSKEKsNFSL	0.185	-0.052	-0.846	-0.238	-	P12382	ATP-dependent 6-phosphofructokinase, liver type	Pfkl
401	KEKSNFsLAIL	0.354	0.006	-0.387	-0.009	-	P12382	ATP-dependent 6-phosphofructokinase, liver type	Pfkl
420	MNAAVRsAVRT	0.138	-0.18	-1.243	-0.428	-	P12382	ATP-dependent 6-phosphofructokinase, liver type	Pfkl
424	VRSAVRtGISE	0.069	-0.077	-1.289	-0.432	-	P12382	ATP-dependent 6-phosphofructokinase, liver type	Pfkl
427	AVRTGIsEGHT	0.254	0.104	-0.512	-0.051	-	P12382	ATP-dependent 6-phosphofructokinase, liver type	Pfkl
431	GISEGHtVYIV	0.208	0.115	-1.002	-0.226	-	P12382	ATP-dependent 6-phosphofructokinase, liver type	Pfkl
464	WLGRGGsMLGT	0.265	0.717	-0.239	0.247	-	P12382	ATP-dependent 6-phosphofructokinase, liver type	Pfkl
468	GGSMLGtKRTL	0.134	-0.268	-1.037	-0.39	-	P12382	ATP-dependent 6-phosphofructokinase, liver type	Pfkl
471	MLGTKRtLPKP	0.515	0.539	-0.113	0.313	-	P12382	ATP-dependent 6-phosphofructokinase, liver type	Pfkl
486	IVENLRtYNIH	0.071	-0.266	-1.282	-0.492	-	P12382	ATP-dependent 6-phosphofructokinase, liver type	Pfkl
527	MCVIPAtISNN	0.168	0.015	-1.106	-0.308	-	P12382	ATP-dependent 6-phosphofructokinase, liver type	Pfkl
529	VIPATIsNNVP	0.089	-0.111	-1.166	-0.396	-	P12382	ATP-dependent 6-phosphofructokinase, liver type	Pfkl
535	SNNVPGtDFSL	0.028	-0.352	-1.815	-0.713	-	P12382	ATP-dependent 6-phosphofructokinase, liver type	Pfkl
538	VPGTDFsLGSD	0.2	-0.029	-0.64	-0.156	-	P12382	ATP-dependent 6-phosphofructokinase, liver type	Pfkl
541	TDFSLGsDTAV	0.088	-0.24	-1.635	-0.595	-	P12382	ATP-dependent 6-phosphofructokinase, liver type	Pfkl
543	FSLGSDtAVNA	0.305	0.172	-0.626	-0.049	-	P12382	ATP-dependent 6-phosphofructokinase, liver type	Pfkl
551	VNAAMEsCDRI	0.234	-0.196	-0.759	-0.24	-	P12382	ATP-dependent 6-phosphofructokinase, liver type	Pfkl
558	CDRIKQsASGT	0.133	0.011	-0.853	-0.236	-	P12382	ATP-dependent 6-phosphofructokinase, liver type	Pfkl
560	RIKQSAsGTKR	0.639	0.298	0.144	0.36	-	P12382	ATP-dependent 6-phosphofructokinase, liver type	Pfkl
562	KQSASGtKRRV	0.202	-0.153	-0.945	-0.298	-	P12382	ATP-dependent 6-phosphofructokinase, liver type	Pfkl
571	RVFIVEtMGGY	0.294	0.134	-0.837	-0.136	-	P12382	ATP-dependent 6-phosphofructokinase, liver type	Pfkl
581	YCGYLAtVTGI	0.327	0.037	-0.529	-0.055	-	P12382	ATP-dependent 6-phosphofructokinase, liver type	Pfkl
583	GYLATVtGIAV	0.33	0.076	-0.466	-0.02	-	P12382	ATP-dependent 6-phosphofructokinase, liver type	Pfkl
612	ANVEHMtEKMK	0.149	-0.053	-0.973	-0.293	-	P12382	ATP-dependent 6-phosphofructokinase, liver type	Pfkl
617	MTEKMKtDIQR	0.633	0.097	0.094	0.275	-	P12382	ATP-dependent 6-phosphofructokinase, liver type	Pfkl
635	KCHEHYtTEFL	0.09	-0.016	-1.283	-0.403	-	P12382	ATP-dependent 6-phosphofructokinase, liver type	Pfkl
636	CHEHYTtEFLY	0.374	0.11	-0.492	-0.003	-	P12382	ATP-dependent 6-phosphofructokinase, liver type	Pfkl
644	FLYNLYsSEGR	0.156	0.079	-0.543	-0.103	-	P12382	ATP-dependent 6-phosphofructokinase, liver type	Pfkl
645	LYNLYSsEGRG	0.255	-0.013	-0.856	-0.204	-	P12382	ATP-dependent 6-phosphofructokinase, liver type	Pfkl
655	GVFDCRtNVLG	0.217	0.029	-1.135	-0.296	-	P12382	ATP-dependent 6-phosphofructokinase, liver type	Pfkl
668	QQGGAPtPFDR	0.103	-0.296	-0.862	-0.352	-	P12382	ATP-dependent 6-phosphofructokinase, liver type	Pfkl
676	FDRNYGtKLGV	0.165	0.047	-0.899	-0.229	-	P12382	ATP-dependent 6-phosphofructokinase, liver type	Pfkl
687	KAMLWVsEKLR	0.303	0.055	-0.544	-0.062	-	P12382	ATP-dependent 6-phosphofructokinase, liver type	Pfkl
706	FANAPDsACVI	0.146	-0.188	-1.22	-0.421	-	P12382	ATP-dependent 6-phosphofructokinase, liver type	Pfkl
720	KKVVAFsPVTE	0.117	-0.259	-1.097	-0.413	-	P12382	ATP-dependent 6-phosphofructokinase, liver type	Pfkl
723	VAFSPVtELKK	0.125	-0.268	-1.134	-0.425	-	P12382	ATP-dependent 6-phosphofructokinase, liver type	Pfkl
729	TELKKEtDFEH	0.173	-0.191	-1.278	-0.432	-	P12382	ATP-dependent 6-phosphofructokinase, liver type	Pfkl
757	LAHYRIsMADY	0.365	0.201	-0.487	0.027	-	P12382	ATP-dependent 6-phosphofructokinase, liver type	Pfkl
763	SMADYVsGELE	0.143	-0.046	-1.05	-0.317	-	P12382	ATP-dependent 6-phosphofructokinase, liver type	Pfkl
770	GELEHVtRRTL	0.281	-0.112	-0.876	-0.236	-	P12382	ATP-dependent 6-phosphofructokinase, liver type	Pfkl
773	EHVTRRtLSID	0.284	0.108	-0.853	-0.154	-	P12382	ATP-dependent 6-phosphofructokinase, liver type	Pfkl
775	VTRRTLsIDKG	0.586	0.993	0.339	0.639	-	P12382	ATP-dependent 6-phosphofructokinase, liver type	Pfkl
2	#NAME?	0.198	-0.224	-0.992	-0.339	-	P20152	Vimentin	Vim
3	#NAME?	0.063	-0.526	-1.513	-0.659	-	P20152	Vimentin	Vim
5	#NAME?	0.031	-0.298	-1.749	-0.672	-	P20152	Vimentin	Vim
7	MSTRSVsSSSY	0.766	0.993	0.617	0.792	-	P20152	Vimentin	Vim
8	STRSVSsSSYR	0.106	-0.137	-1.464	-0.498	-	P20152	Vimentin	Vim
9	TRSVSSsSYRR	0.154	0.151	-0.853	-0.183	-	P20152	Vimentin	Vim
10	RSVSSSsYRRM	0.155	-0.165	-0.96	-0.324	-	P20152	Vimentin	Vim
18	RRMFGGsGTSS	0.068	0.003	-1.343	-0.424	-	P20152	Vimentin	Vim
20	MFGGSGtSSRP	0.1	-0.056	-1.059	-0.338	-	P20152	Vimentin	Vim
21	FGGSGTsSRPS	0.047	-0.309	-1.386	-0.549	-	P20152	Vimentin	Vim
22	GGSGTSsRPSS	0.16	0.25	-0.745	-0.112	-	P20152	Vimentin	Vim
25	GTSSRPsSNRS	0.263	-0.129	-0.983	-0.283	-	P20152	Vimentin	Vim
26	TSSRPSsNRSY	0.238	0.453	-0.509	0.061	-	P20152	Vimentin	Vim
29	RPSSNRsYVTT	0.068	-0.271	-1.401	-0.534	-	P20152	Vimentin	Vim
32	SNRSYVtTSTR	0.231	-0.068	-0.82	-0.219	-	P20152	Vimentin	Vim
33	NRSYVTtSTRT	0.215	0.01	-0.837	-0.204	-	P20152	Vimentin	Vim
34	RSYVTTsTRTY	0.111	-0.125	-1.07	-0.361	-	P20152	Vimentin	Vim
35	SYVTTStRTYS	0.066	-0.279	-1.82	-0.678	-	P20152	Vimentin	Vim
37	VTTSTRtYSLG	0.052	-0.224	-1.54	-0.571	-	P20152	Vimentin	Vim
39	TSTRTYsLGSA	0.605	0.946	0.755	0.769	-	P20152	Vimentin	Vim
42	RTYSLGsALRP	0.046	-0.342	-2.003	-0.766	-	P20152	Vimentin	Vim
47	GSALRPsTSRS	0.186	-0.152	-1.119	-0.362	-	P20152	Vimentin	Vim
48	SALRPStSRSL	0.156	0.473	-0.557	0.024	-	P20152	Vimentin	Vim
49	ALRPSTsRSLY	0.584	0.347	-0.105	0.275	-	P20152	Vimentin	Vim
51	RPSTSRsLYSS	0.231	0.148	-0.694	-0.105	-	P20152	Vimentin	Vim
54	TSRSLYsSSPG	0.108	-0.064	-1.057	-0.338	-	P20152	Vimentin	Vim
55	SRSLYSsSPGG	0.365	0.461	-0.412	0.138	-	P20152	Vimentin	Vim
56	RSLYSSsPGGA	0.204	-0.182	-0.486	-0.155	-	P20152	Vimentin	Vim
63	PGGAYVtRSSA	0.11	-0.286	-1.126	-0.434	-	P20152	Vimentin	Vim
65	GAYVTRsSAVR	0.051	-0.12	-1.546	-0.538	-	P20152	Vimentin	Vim
66	AYVTRSsAVRL	0.242	0.038	-1.06	-0.26	-	P20152	Vimentin	Vim
72	SAVRLRsSVPG	0.178	0.575	-0.833	-0.027	-	P20152	Vimentin	Vim
73	AVRLRSsVPGV	0.758	0.737	0.188	0.561	-	P20152	Vimentin	Vim
83	VRLLQDsVDFS	0.112	0.007	-1.228	-0.369	-	P20152	Vimentin	Vim
87	QDSVDFsLADA	0.154	-0.124	-0.703	-0.224	-	P20152	Vimentin	Vim
94	LADAINtEFKN	0.202	-0.026	-0.747	-0.19	-	P20152	Vimentin	Vim
99	NTEFKNtRTNE	0.248	-0.144	-1.201	-0.366	-	P20152	Vimentin	Vim
101	EFKNTRtNEKV	0.069	-0.059	-1.328	-0.439	-	P20152	Vimentin	Vim
144	LKGQGKsRLGD	0.206	-0.121	-0.511	-0.142	-	P20152	Vimentin	Vim
165	RQVDQLtNDKA	0.073	-0.119	-1.372	-0.473	-	P20152	Vimentin	Vim
201	QREEAEsTLQS	0.122	0.057	-1.108	-0.31	-	P20152	Vimentin	Vim
202	REEAEStLQSF	0.137	-0.139	-1.022	-0.341	-	P20152	Vimentin	Vim
205	AESTLQsFRQD	0.233	-0.166	-0.827	-0.253	-	P20152	Vimentin	Vim
214	QDVDNAsLARL	0.219	-0.1	-0.824	-0.235	-	P20152	Vimentin	Vim
226	LERKVEsLQEE	0.711	0.279	-0.047	0.314	-	P20152	Vimentin	Vim
261	QIDVDVsKPDL	0.641	0.529	0.23	0.467	-	P20152	Vimentin	Vim
266	VSKPDLtAALR	0.096	-0.23	-1.158	-0.431	-	P20152	Vimentin	Vim
278	VRQQYEsVAAK	0.295	0.162	-0.478	-0.007	-	P20152	Vimentin	Vim
293	AEEWYKsKFAD	0.523	0.045	0.037	0.202	-	P20152	Vimentin	Vim
299	SKFADLsEAAN	0.181	-0.006	-0.841	-0.222	-	P20152	Vimentin	Vim
316	RQAKQEsNEYR	0.158	-0.097	-1.104	-0.348	-	P20152	Vimentin	Vim
325	YRRQVQsLTCE	0.728	0.554	0.329	0.537	-	P20152	Vimentin	Vim
327	RQVQSLtCEVD	0.316	0.291	-0.227	0.127	-	P20152	Vimentin	Vim
336	VDALKGtNESL	0.028	-0.364	-1.861	-0.732	-	P20152	Vimentin	Vim
339	LKGTNEsLERQ	0.298	-0.097	-0.754	-0.184	-	P20152	Vimentin	Vim
361	AANYQDtIGRL	0.123	-0.227	-1.358	-0.487	-	P20152	Vimentin	Vim
399	LDIEIAtYRKL	0.057	-0.196	-1.202	-0.447	-	P20152	Vimentin	Vim
409	LLEGEEsRISL	0.085	-0.15	-1.143	-0.403	-	P20152	Vimentin	Vim
412	GEESRIsLPLP	0.808	0.607	0.424	0.613	-	P20152	Vimentin	Vim
417	ISLPLPtFSSL	0.076	-0.266	-1.129	-0.439	-	P20152	Vimentin	Vim
419	LPLPTFsSLNL	0.061	-0.056	-1.231	-0.409	-	P20152	Vimentin	Vim
420	PLPTFSsLNLR	0.356	0.067	-0.41	0.004	-	P20152	Vimentin	Vim
426	SLNLREtNLES	0.18	0.011	-1.385	-0.398	-	P20152	Vimentin	Vim
430	RETNLEsLPLV	0.58	0.5	-0.174	0.302	-	P20152	Vimentin	Vim
436	SLPLVDtHSKR	0.102	-0.221	-1.524	-0.548	-	P20152	Vimentin	Vim
438	PLVDTHsKRTL	0.374	0.204	-0.377	0.067	-	P20152	Vimentin	Vim
441	DTHSKRtLLIK	0.124	-0.225	-1.414	-0.505	-	P20152	Vimentin	Vim
446	RTLLIKtVETR	0.323	0.034	-0.357	0	-	P20152	Vimentin	Vim
449	LIKTVEtRDGQ	0.223	-0.145	-0.921	-0.281	-	P20152	Vimentin	Vim
458	GQVINEtSQHH	0.073	-0.258	-1.319	-0.501	-	P20152	Vimentin	Vim
459	QVINETsQHHD	0.096	-0.143	-1.102	-0.383	-	P20152	Vimentin	Vim
2	#NAME?	0.475	0.023	-0.396	0.034	-	P23475	X-ray repair cross-complementing protein 6	Xrcc6
6	#NAME?	0.048	-0.215	-1.539	-0.569	-	P23475	X-ray repair cross-complementing protein 6	Xrcc6
10	WESYYKtEGEE	0.461	0.101	-0.122	0.147	-	P23475	X-ray repair cross-complementing protein 6	Xrcc6
21	EEEEEEsPDTG	0.047	-0.479	-1.773	-0.735	-	P23475	X-ray repair cross-complementing protein 6	Xrcc6
24	EEESPDtGGEY	0.151	-0.263	-1.107	-0.406	-	P23475	X-ray repair cross-complementing protein 6	Xrcc6
31	GGEYKYsGRDS	0.228	-0.044	-0.45	-0.089	-	P23475	X-ray repair cross-complementing protein 6	Xrcc6
35	KYSGRDsLIFL	0.297	0.077	-0.445	-0.024	-	P23475	X-ray repair cross-complementing protein 6	Xrcc6
43	IFLVDAsRAMF	0.109	-0.276	-1.142	-0.436	-	P23475	X-ray repair cross-complementing protein 6	Xrcc6
49	SRAMFEsQGED	0.275	0.056	-0.94	-0.203	-	P23475	X-ray repair cross-complementing protein 6	Xrcc6
56	QGEDELtPFDM	0.085	-0.401	-1.247	-0.521	-	P23475	X-ray repair cross-complementing protein 6	Xrcc6
61	LTPFDMsIQCI	0.244	0.071	-0.561	-0.082	-	P23475	X-ray repair cross-complementing protein 6	Xrcc6
67	SIQCIQsVYTS	0.169	0.018	-0.84	-0.217	-	P23475	X-ray repair cross-complementing protein 6	Xrcc6
70	CIQSVYtSKII	0.352	0.143	-0.287	0.07	-	P23475	X-ray repair cross-complementing protein 6	Xrcc6
71	IQSVYTsKIIS	0.121	-0.141	-0.731	-0.25	-	P23475	X-ray repair cross-complementing protein 6	Xrcc6
75	YTSKIIsSDRD	0.401	-0.074	-0.42	-0.031	-	P23475	X-ray repair cross-complementing protein 6	Xrcc6
76	TSKIISsDRDL	0.221	-0.067	-0.602	-0.149	-	P23475	X-ray repair cross-complementing protein 6	Xrcc6
88	AVVFYGtEKDK	0.194	-0.043	-0.847	-0.232	-	P23475	X-ray repair cross-complementing protein 6	Xrcc6
94	TEKDKNsVNFK	0.169	-0.126	-1.007	-0.321	-	P23475	X-ray repair cross-complementing protein 6	Xrcc6
132	KKHFRDtVGHG	0.397	0.078	-0.449	0.009	-	P23475	X-ray repair cross-complementing protein 6	Xrcc6
137	DTVGHGsDYSL	0.125	-0.068	-1.319	-0.42	-	P23475	X-ray repair cross-complementing protein 6	Xrcc6
140	GHGSDYsLSEV	0.19	0.008	-1.115	-0.306	-	P23475	X-ray repair cross-complementing protein 6	Xrcc6
142	GSDYSLsEVLW	0.259	0.229	-0.439	0.017	-	P23475	X-ray repair cross-complementing protein 6	Xrcc6
153	VCANLFsDVQL	0.181	0.017	-0.736	-0.18	-	P23475	X-ray repair cross-complementing protein 6	Xrcc6
160	DVQLKMsHKRI	0.318	0.066	-0.685	-0.1	-	P23475	X-ray repair cross-complementing protein 6	Xrcc6
168	KRIMLFtNEDD	0.265	0.167	-0.763	-0.11	-	P23475	X-ray repair cross-complementing protein 6	Xrcc6
178	DPHGRDsAKAS	0.183	-0.001	-1.087	-0.301	-	P23475	X-ray repair cross-complementing protein 6	Xrcc6
182	RDSAKAsRART	0.068	-0.44	-1.634	-0.669	-	P23475	X-ray repair cross-complementing protein 6	Xrcc6
186	KASRARtKASD	0.407	0.705	-0.115	0.332	-	P23475	X-ray repair cross-complementing protein 6	Xrcc6
189	RARTKAsDLRD	0.406	0.124	-0.814	-0.095	-	P23475	X-ray repair cross-complementing protein 6	Xrcc6
194	ASDLRDtGIFL	0.115	-0.187	-1.225	-0.432	-	P23475	X-ray repair cross-complementing protein 6	Xrcc6
212	PGGFDVsVFYR	0.291	-0.057	-0.563	-0.11	-	P23475	X-ray repair cross-complementing protein 6	Xrcc6
220	FYRDIItTAED	0.589	0.321	-0.065	0.282	-	P23475	X-ray repair cross-complementing protein 6	Xrcc6
221	YRDIITtAEDE	0.243	0.232	-0.551	-0.025	-	P23475	X-ray repair cross-complementing protein 6	Xrcc6
234	GVHFEEsSKLE	0.097	-0.179	-1.5	-0.527	-	P23475	X-ray repair cross-complementing protein 6	Xrcc6
235	VHFEESsKLED	0.082	-0.194	-1.624	-0.579	-	P23475	X-ray repair cross-complementing protein 6	Xrcc6
249	KVRAKEtKKRV	0.193	-0.054	-1.181	-0.348	-	P23475	X-ray repair cross-complementing protein 6	Xrcc6
255	TKKRVLsRLKF	0.424	0.71	-0.08	0.351	-	P23475	X-ray repair cross-complementing protein 6	Xrcc6
290	VRLYREtNEPV	0.247	0.181	-0.913	-0.161	-	P23475	X-ray repair cross-complementing protein 6	Xrcc6
296	TNEPVKtKTRT	0.175	-0.314	-0.846	-0.328	-	P23475	X-ray repair cross-complementing protein 6	Xrcc6
298	EPVKTKtRTFN	0.157	-0.098	-0.964	-0.302	-	P23475	X-ray repair cross-complementing protein 6	Xrcc6
300	VKTKTRtFNVN	0.464	0.242	-0.146	0.187	-	P23475	X-ray repair cross-complementing protein 6	Xrcc6
305	RTFNVNtGSLL	0.186	-0.021	-0.94	-0.259	-	P23475	X-ray repair cross-complementing protein 6	Xrcc6
307	FNVNTGsLLLP	0.064	-0.083	-1.087	-0.369	-	P23475	X-ray repair cross-complementing protein 6	Xrcc6
312	GSLLLPsDTKR	0.191	-0.167	-1.164	-0.38	-	P23475	X-ray repair cross-complementing protein 6	Xrcc6
314	LLLPSDtKRSL	0.277	0.064	-0.332	0.003	-	P23475	X-ray repair cross-complementing protein 6	Xrcc6
317	PSDTKRsLTYG	0.196	-0.147	-1.067	-0.339	-	P23475	X-ray repair cross-complementing protein 6	Xrcc6
319	DTKRSLtYGTR	0.805	1.007	0.777	0.863	-	P23475	X-ray repair cross-complementing protein 6	Xrcc6
322	RSLTYGtRQIV	0.182	-0.222	-1.307	-0.449	-	P23475	X-ray repair cross-complementing protein 6	Xrcc6
332	VLEKEEtEELK	0.375	0.013	-0.647	-0.087	-	P23475	X-ray repair cross-complementing protein 6	Xrcc6
351	LMGFKPtVMLK	0.083	-0.065	-1.142	-0.375	-	P23475	X-ray repair cross-complementing protein 6	Xrcc6
363	QHYLRPsLFVY	0.421	0.195	-0.496	0.04	-	P23475	X-ray repair cross-complementing protein 6	Xrcc6
371	FVYPEEsLVSG	0.116	-0.045	-1.052	-0.327	-	P23475	X-ray repair cross-complementing protein 6	Xrcc6
374	PEESLVsGSST	0.059	-0.368	-1.504	-0.604	-	P23475	X-ray repair cross-complementing protein 6	Xrcc6
376	ESLVSGsSTLF	0.099	-0.066	-0.993	-0.32	-	P23475	X-ray repair cross-complementing protein 6	Xrcc6
377	SLVSGSsTLFS	0.026	-0.35	-1.973	-0.765	-	P23475	X-ray repair cross-complementing protein 6	Xrcc6
378	LVSGSStLFSA	0.191	0.114	-0.256	0.016	-	P23475	X-ray repair cross-complementing protein 6	Xrcc6
381	GSSTLFsALLT	0.106	-0.138	-1.314	-0.449	-	P23475	X-ray repair cross-complementing protein 6	Xrcc6
385	LFSALLtKCVE	0.065	-0.287	-1.243	-0.489	-	P23475	X-ray repair cross-complementing protein 6	Xrcc6
399	IAVCRYtPRKN	0.19	-0.224	-0.925	-0.32	-	P23475	X-ray repair cross-complementing protein 6	Xrcc6
405	TPRKNVsPYFV	0.314	-0.148	-0.842	-0.226	-	P23475	X-ray repair cross-complementing protein 6	Xrcc6
426	DQNIQVtPGGF	0.094	-0.383	-1.265	-0.518	-	P23475	X-ray repair cross-complementing protein 6	Xrcc6
447	KRKVPFtEKVT	0.154	0.158	-0.582	-0.09	-	P23475	X-ray repair cross-complementing protein 6	Xrcc6
451	PFTEKVtANQE	0.27	-0.037	-0.526	-0.098	-	P23475	X-ray repair cross-complementing protein 6	Xrcc6
470	VQKLRFtYRSD	0.222	0.014	-0.466	-0.077	-	P23475	X-ray repair cross-complementing protein 6	Xrcc6
473	LRFTYRsDSFE	0.117	0.032	-1.325	-0.392	-	P23475	X-ray repair cross-complementing protein 6	Xrcc6
475	FTYRSDsFENP	0.763	1.079	0.455	0.766	-	P23475	X-ray repair cross-complementing protein 6	Xrcc6
498	ALDMMEsEQVV	0.303	-0.036	-0.921	-0.218	-	P23475	X-ray repair cross-complementing protein 6	Xrcc6
505	EQVVDLtLPKV	0.266	0.388	-0.44	0.071	-	P23475	X-ray repair cross-complementing protein 6	Xrcc6
518	IKKRLGsLADE	0.85	0.892	0.838	0.86	-	P23475	X-ray repair cross-complementing protein 6	Xrcc6
548	KQDDEGsTSKK	0.035	-0.396	-1.899	-0.753	-	P23475	X-ray repair cross-complementing protein 6	Xrcc6
549	QDDEGStSKKP	0.012	-0.502	-2.202	-0.897	-	P23475	X-ray repair cross-complementing protein 6	Xrcc6
550	DDEGSTsKKPK	0.196	-0.074	-0.534	-0.137	-	P23475	X-ray repair cross-complementing protein 6	Xrcc6
558	KPKVELsEEEL	0.107	-0.059	-1.157	-0.37	-	P23475	X-ray repair cross-complementing protein 6	Xrcc6
570	AHFRKGtLGKL	0.574	0.839	0.006	0.473	-	P23475	X-ray repair cross-complementing protein 6	Xrcc6
575	GTLGKLtVPTL	0.403	0.41	-0.195	0.206	-	P23475	X-ray repair cross-complementing protein 6	Xrcc6
578	GKLTVPtLKDI	0.741	0.19	0.268	0.4	-	P23475	X-ray repair cross-complementing protein 6	Xrcc6
590	KAHGLKsGPKK	0.245	0.221	-0.519	-0.018	-	P23475	X-ray repair cross-complementing protein 6	Xrcc6
7	MADYLIsGGTS	0.176	-0.105	-0.876	-0.268	-	P24547	Inosine-5'-monophosphate dehydrogenase 2	Impdh2
10	YLISGGtSYVP	0.051	-0.184	-1.457	-0.53	-	P24547	Inosine-5'-monophosphate dehydrogenase 2	Impdh2
11	LISGGTsYVPD	0.084	-0.149	-0.95	-0.339	-	P24547	Inosine-5'-monophosphate dehydrogenase 2	Impdh2
19	VPDDGLtAQQL	0.07	-0.182	-1.387	-0.5	-	P24547	Inosine-5'-monophosphate dehydrogenase 2	Impdh2
31	NCGDGLtYNDF	0.087	-0.093	-1.162	-0.389	-	P24547	Inosine-5'-monophosphate dehydrogenase 2	Impdh2
45	PGYIDFtADQV	0.222	0.04	-0.766	-0.168	-	P24547	Inosine-5'-monophosphate dehydrogenase 2	Impdh2
52	ADQVDLtSALT	0.029	-0.356	-1.787	-0.705	-	P24547	Inosine-5'-monophosphate dehydrogenase 2	Impdh2
53	DQVDLTsALTK	0.096	-0.172	-1.42	-0.499	-	P24547	Inosine-5'-monophosphate dehydrogenase 2	Impdh2
56	DLTSALtKKIT	0.27	-0.053	-0.603	-0.129	-	P24547	Inosine-5'-monophosphate dehydrogenase 2	Impdh2
60	ALTKKItLKTP	0.423	0.021	-0.218	0.075	-	P24547	Inosine-5'-monophosphate dehydrogenase 2	Impdh2
63	KKITLKtPLVS	0.091	-0.293	-1.359	-0.52	-	P24547	Inosine-5'-monophosphate dehydrogenase 2	Impdh2
67	LKTPLVsSPMD	0.662	0.374	0.187	0.408	-	P24547	Inosine-5'-monophosphate dehydrogenase 2	Impdh2
68	KTPLVSsPMDT	0.052	-0.508	-1.758	-0.738	-	P24547	Inosine-5'-monophosphate dehydrogenase 2	Impdh2
72	VSSPMDtVTEA	0.164	-0.363	-1.062	-0.421	-	P24547	Inosine-5'-monophosphate dehydrogenase 2	Impdh2
74	SPMDTVtEAGM	0.124	-0.087	-1.04	-0.334	-	P24547	Inosine-5'-monophosphate dehydrogenase 2	Impdh2
85	AIAMALtGGIG	0.313	-0.011	-0.483	-0.06	-	P24547	Inosine-5'-monophosphate dehydrogenase 2	Impdh2
96	FIHHNCtPEFQ	0.072	-0.35	-1.534	-0.604	-	P24547	Inosine-5'-monophosphate dehydrogenase 2	Impdh2
116	YEQGFItDPVV	0.612	0.542	-0.309	0.281	-	P24547	Inosine-5'-monophosphate dehydrogenase 2	Impdh2
122	TDPVVLsPKDR	0.026	-0.545	-1.81	-0.776	-	P24547	Inosine-5'-monophosphate dehydrogenase 2	Impdh2
145	FCGIPItDTGR	0.286	-0.016	-0.751	-0.161	-	P24547	Inosine-5'-monophosphate dehydrogenase 2	Impdh2
147	GIPITDtGRMG	0.109	-0.185	-1.326	-0.467	-	P24547	Inosine-5'-monophosphate dehydrogenase 2	Impdh2
152	DTGRMGsRLVG	0.371	0.565	-0.567	0.123	-	P24547	Inosine-5'-monophosphate dehydrogenase 2	Impdh2
159	RLVGIIsSRDI	0.485	0.117	-0.038	0.188	-	P24547	Inosine-5'-monophosphate dehydrogenase 2	Impdh2
160	LVGIISsRDID	0.097	-0.142	-0.942	-0.329	-	P24547	Inosine-5'-monophosphate dehydrogenase 2	Impdh2
180	FLEEIMtKRED	0.509	0.222	0.041	0.257	-	P24547	Inosine-5'-monophosphate dehydrogenase 2	Impdh2
193	VAPAGVtLKEA	0.228	-0.201	-0.67	-0.214	-	P24547	Inosine-5'-monophosphate dehydrogenase 2	Impdh2
204	NEILQRsKKGK	0.079	-0.187	-1.407	-0.505	-	P24547	Inosine-5'-monophosphate dehydrogenase 2	Impdh2
225	VAIIARtDLKK	0.101	-0.095	-1.432	-0.475	-	P24547	Inosine-5'-monophosphate dehydrogenase 2	Impdh2
237	RDYPLAsKDAK	0.153	-0.103	-0.779	-0.243	-	P24547	Inosine-5'-monophosphate dehydrogenase 2	Impdh2
252	CGAAIGtHEDD	0.314	-0.044	-0.246	0.008	-	P24547	Inosine-5'-monophosphate dehydrogenase 2	Impdh2
275	DVVVLDsSQGN	0.073	-0.256	-1.588	-0.59	-	P24547	Inosine-5'-monophosphate dehydrogenase 2	Impdh2
276	VVVLDSsQGNS	0.07	-0.173	-1.616	-0.573	-	P24547	Inosine-5'-monophosphate dehydrogenase 2	Impdh2
280	DSSQGNsIFQI	0.267	-0.15	-0.574	-0.152	-	P24547	Inosine-5'-monophosphate dehydrogenase 2	Impdh2
296	IKEKYPsLQVI	0.826	0.233	0.615	0.558	-	P24547	Inosine-5'-monophosphate dehydrogenase 2	Impdh2
306	IGGNVVtAAQA	0.228	-0.153	-0.635	-0.187	-	P24547	Inosine-5'-monophosphate dehydrogenase 2	Impdh2
327	LRVGMGsGSIC	0.06	-0.162	-1.41	-0.504	-	P24547	Inosine-5'-monophosphate dehydrogenase 2	Impdh2
329	VGMGSGsICIT	0.111	-0.112	-0.838	-0.28	-	P24547	Inosine-5'-monophosphate dehydrogenase 2	Impdh2
333	SGSICItQEVL	0.141	-0.102	-1.131	-0.364	-	P24547	Inosine-5'-monophosphate dehydrogenase 2	Impdh2
345	CGRPQAtAVYK	0.331	0.153	-0.62	-0.045	-	P24547	Inosine-5'-monophosphate dehydrogenase 2	Impdh2
351	TAVYKVsEYAR	0.251	0.04	-0.46	-0.057	-	P24547	Inosine-5'-monophosphate dehydrogenase 2	Impdh2
382	ALALGAsTVMM	0.167	-0.105	-0.961	-0.3	-	P24547	Inosine-5'-monophosphate dehydrogenase 2	Impdh2
383	LALGAStVMMG	0.136	-0.129	-0.906	-0.299	-	P24547	Inosine-5'-monophosphate dehydrogenase 2	Impdh2
388	STVMMGsLLAA	0.158	-0.188	-0.931	-0.32	-	P24547	Inosine-5'-monophosphate dehydrogenase 2	Impdh2
393	GSLLAAtTEAP	0.303	0.031	-0.642	-0.103	-	P24547	Inosine-5'-monophosphate dehydrogenase 2	Impdh2
394	SLLAATtEAPG	0.274	0.014	-0.563	-0.092	-	P24547	Inosine-5'-monophosphate dehydrogenase 2	Impdh2
403	PGEYFFsDGIR	0.478	0.103	-0.214	0.122	-	P24547	Inosine-5'-monophosphate dehydrogenase 2	Impdh2
416	KYRGMGsLDAM	0.6	0.281	0.189	0.357	-	P24547	Inosine-5'-monophosphate dehydrogenase 2	Impdh2
425	AMDKHLsSQNR	0.194	0.087	-0.996	-0.238	-	P24547	Inosine-5'-monophosphate dehydrogenase 2	Impdh2
426	MDKHLSsQNRY	0.133	-0.211	-1.264	-0.447	-	P24547	Inosine-5'-monophosphate dehydrogenase 2	Impdh2
432	SQNRYFsEADK	0.582	0.842	0.25	0.558	-	P24547	Inosine-5'-monophosphate dehydrogenase 2	Impdh2
444	KVAQGVsGAVQ	0.1	-0.25	-1.022	-0.391	-	P24547	Inosine-5'-monophosphate dehydrogenase 2	Impdh2
452	AVQDKGsIHKF	0.053	-0.214	-1.554	-0.572	-	P24547	Inosine-5'-monophosphate dehydrogenase 2	Impdh2
467	IAGIQHsCQDI	0.368	0.231	-0.411	0.063	-	P24547	Inosine-5'-monophosphate dehydrogenase 2	Impdh2
475	QDIGAKsLTQV	0.417	0.073	-0.297	0.064	-	P24547	Inosine-5'-monophosphate dehydrogenase 2	Impdh2
477	IGAKSLtQVRA	0.374	0.018	-0.407	-0.005	-	P24547	Inosine-5'-monophosphate dehydrogenase 2	Impdh2
485	VRAMMYsGELK	0.177	0.034	-0.506	-0.099	-	P24547	Inosine-5'-monophosphate dehydrogenase 2	Impdh2
494	LKFEKRtSSAQ	0.076	-0.124	-1.345	-0.464	-	P24547	Inosine-5'-monophosphate dehydrogenase 2	Impdh2
495	KFEKRTsSAQV	0.436	0.035	-0.483	-0.004	-	P24547	Inosine-5'-monophosphate dehydrogenase 2	Impdh2
496	FEKRTSsAQVE	0.544	0.942	0.072	0.519	-	P24547	Inosine-5'-monophosphate dehydrogenase 2	Impdh2
505	VEGGVHsLHSY	0.272	0.109	-0.725	-0.115	-	P24547	Inosine-5'-monophosphate dehydrogenase 2	Impdh2
508	GVHSLHsYEKR	0.083	-0.084	-1.341	-0.447	-	P24547	Inosine-5'-monophosphate dehydrogenase 2	Impdh2
5	#NAME?	0.277	-0.111	-0.49	-0.108	-	P27546	Microtubule-associated protein 4	Map4
11	SLVDALtEPPP	0.442	0.494	-0.275	0.22	-	P27546	Microtubule-associated protein 4	Map4
41	DDIVGEtVEKT	0.03	-0.337	-1.898	-0.735	-	P27546	Microtubule-associated protein 4	Map4
45	GETVEKtEFIP	0.252	0.006	-0.752	-0.165	-	P27546	Microtubule-associated protein 4	Map4
57	LDGDEKtGNSE	0.066	-0.241	-1.227	-0.467	-	P27546	Microtubule-associated protein 4	Map4
60	DEKTGNsESKK	0.163	-0.138	-1.262	-0.413	-	P27546	Microtubule-associated protein 4	Map4
62	KTGNSEsKKKP	0.097	-0.074	-1.008	-0.328	-	P27546	Microtubule-associated protein 4	Map4
70	KKPCLDtSQVE	0.148	-0.225	-1.376	-0.484	-	P27546	Microtubule-associated protein 4	Map4
71	KPCLDTsQVEG	0.14	-0.172	-1.359	-0.464	-	P27546	Microtubule-associated protein 4	Map4
78	QVEGIPsSKPT	0.055	-0.304	-1.065	-0.438	-	P27546	Microtubule-associated protein 4	Map4
79	VEGIPSsKPTL	0.212	0.246	-0.536	-0.026	-	P27546	Microtubule-associated protein 4	Map4
82	IPSSKPtLLAN	0.177	-0.13	-0.786	-0.246	-	P27546	Microtubule-associated protein 4	Map4
96	GMEGNNtAGSP	0.199	0.119	-0.824	-0.169	-	P27546	Microtubule-associated protein 4	Map4
99	GNNTAGsPTDF	0.127	-0.393	-1.349	-0.538	-	P27546	Microtubule-associated protein 4	Map4
101	NTAGSPtDFLE	0.38	0.124	-0.327	0.059	-	P27546	Microtubule-associated protein 4	Map4
115	DYPDYQsSQNW	0.202	0.004	-1.141	-0.312	-	P27546	Microtubule-associated protein 4	Map4
116	YPDYQSsQNWP	0.047	-0.225	-1.441	-0.54	-	P27546	Microtubule-associated protein 4	Map4
124	NWPEDAsFCFQ	0.075	-0.228	-1.461	-0.538	-	P27546	Microtubule-associated protein 4	Map4
135	PQQVLDtDQAE	0.15	-0.049	-0.999	-0.299	-	P27546	Microtubule-associated protein 4	Map4
156	ADLLFVsSGPT	0.133	-0.28	-1.132	-0.426	-	P27546	Microtubule-associated protein 4	Map4
157	DLLFVSsGPTN	0.627	0.439	-0.084	0.327	-	P27546	Microtubule-associated protein 4	Map4
160	FVSSGPtNASA	0.034	-0.344	-1.671	-0.66	-	P27546	Microtubule-associated protein 4	Map4
163	SGPTNAsAFTE	0.139	-0.178	-1.167	-0.402	-	P27546	Microtubule-associated protein 4	Map4
166	TNASAFtERDN	0.33	0.006	-0.352	-0.005	-	P27546	Microtubule-associated protein 4	Map4
172	TERDNPsEDSY	0.394	0.211	-0.535	0.023	-	P27546	Microtubule-associated protein 4	Map4
175	DNPSEDsYGML	0.086	-0.398	-1.652	-0.655	-	P27546	Microtubule-associated protein 4	Map4
183	GMLPCDsFAST	0.139	-0.079	-0.992	-0.311	-	P27546	Microtubule-associated protein 4	Map4
186	PCDSFAsTAVV	0.196	-0.087	-1.386	-0.426	-	P27546	Microtubule-associated protein 4	Map4
187	CDSFAStAVVS	0.13	-0.051	-1.077	-0.333	-	P27546	Microtubule-associated protein 4	Map4
191	ASTAVVsQEWS	0.185	-0.232	-1.105	-0.384	-	P27546	Microtubule-associated protein 4	Map4
195	VVSQEWsVGAP	0.208	-0.1	-0.666	-0.186	-	P27546	Microtubule-associated protein 4	Map4
201	SVGAPNsPCSE	0.021	-0.655	-2.123	-0.919	-	P27546	Microtubule-associated protein 4	Map4
204	APNSPCsESCV	0.107	-0.194	-1.643	-0.577	-	P27546	Microtubule-associated protein 4	Map4
206	NSPCSEsCVSP	0.112	-0.024	-1.209	-0.374	-	P27546	Microtubule-associated protein 4	Map4
209	CSESCVsPEVT	0.168	-0.422	-0.951	-0.402	-	P27546	Microtubule-associated protein 4	Map4
213	CVSPEVtIETL	0.164	-0.152	-0.796	-0.261	-	P27546	Microtubule-associated protein 4	Map4
216	PEVTIEtLQPA	0.253	-0.08	-0.644	-0.157	-	P27546	Microtubule-associated protein 4	Map4
221	ETLQPAtELSK	0.112	-0.166	-0.959	-0.338	-	P27546	Microtubule-associated protein 4	Map4
224	QPATELsKAAE	0.085	-0.237	-1.193	-0.448	-	P27546	Microtubule-associated protein 4	Map4
231	KAAEVEsVKEQ	0.088	-0.233	-1.387	-0.511	-	P27546	Microtubule-associated protein 4	Map4
243	PAKALEtMAEQ	0.147	-0.133	-1.293	-0.427	-	P27546	Microtubule-associated protein 4	Map4
248	ETMAEQtTDVV	0.18	-0.042	-1.114	-0.325	-	P27546	Microtubule-associated protein 4	Map4
249	TMAEQTtDVVH	0.048	-0.058	-1.574	-0.528	-	P27546	Microtubule-associated protein 4	Map4
254	TTDVVHsPSTD	0.067	-0.383	-1.556	-0.624	-	P27546	Microtubule-associated protein 4	Map4
256	DVVHSPsTDTT	0.261	0.033	-0.563	-0.09	-	P27546	Microtubule-associated protein 4	Map4
257	VVHSPStDTTP	0.046	-0.394	-1.659	-0.669	-	P27546	Microtubule-associated protein 4	Map4
259	HSPSTDtTPGP	0.166	0.161	-0.77	-0.148	-	P27546	Microtubule-associated protein 4	Map4
260	SPSTDTtPGPD	0.075	-0.503	-1.484	-0.638	-	P27546	Microtubule-associated protein 4	Map4
265	TTPGPDtEAAL	0.089	-0.187	-1.107	-0.401	-	P27546	Microtubule-associated protein 4	Map4
277	KDIEEItKPDV	0.406	0.347	-0.585	0.056	-	P27546	Microtubule-associated protein 4	Map4
287	VILANVtQPST	0.51	0.325	-0.134	0.234	-	P27546	Microtubule-associated protein 4	Map4
290	ANVTQPsTESD	0.057	-0.312	-1.597	-0.617	-	P27546	Microtubule-associated protein 4	Map4
291	NVTQPStESDM	0.135	-0.106	-0.661	-0.211	-	P27546	Microtubule-associated protein 4	Map4
293	TQPSTEsDMFL	0.048	-0.218	-1.587	-0.586	-	P27546	Microtubule-associated protein 4	Map4
305	QDMELLtGTEA	0.038	-0.299	-1.562	-0.608	-	P27546	Microtubule-associated protein 4	Map4
307	MELLTGtEAAH	0.099	-0.057	-1.243	-0.4	-	P27546	Microtubule-associated protein 4	Map4
319	NNIILPtEPDE	0.467	0.409	-0.208	0.223	-	P27546	Microtubule-associated protein 4	Map4
324	PTEPDEsSTKD	0.157	-0.251	-1.189	-0.428	-	P27546	Microtubule-associated protein 4	Map4
325	TEPDESsTKDV	0.078	-0.234	-1.734	-0.63	-	P27546	Microtubule-associated protein 4	Map4
326	EPDESStKDVA	0.131	0.04	-0.75	-0.193	-	P27546	Microtubule-associated protein 4	Map4
343	IVPGNDtTSPK	0.064	-0.375	-1.375	-0.562	-	P27546	Microtubule-associated protein 4	Map4
344	VPGNDTtSPKE	0.186	0.208	-0.644	-0.083	-	P27546	Microtubule-associated protein 4	Map4
345	PGNDTTsPKET	0.061	-0.353	-1.345	-0.545	-	P27546	Microtubule-associated protein 4	Map4
349	TTSPKEtETTL	0.123	-0.201	-1.215	-0.431	-	P27546	Microtubule-associated protein 4	Map4
351	SPKETEtTLPI	0.053	-0.191	-1.533	-0.557	-	P27546	Microtubule-associated protein 4	Map4
352	PKETETtLPIK	0.85	0.535	0.606	0.664	-	P27546	Microtubule-associated protein 4	Map4
368	PEDVLLtKETE	0.045	-0.274	-1.62	-0.616	-	P27546	Microtubule-associated protein 4	Map4
371	VLLTKEtELAP	0.13	-0.047	-1.009	-0.309	-	P27546	Microtubule-associated protein 4	Map4
381	PAKGMVsLSEI	0.586	0.039	0.089	0.238	-	P27546	Microtubule-associated protein 4	Map4
383	KGMVSLsEIEE	0.163	0.156	-0.544	-0.075	-	P27546	Microtubule-associated protein 4	Map4
395	LAKNDEsSAEI	0.14	-0.17	-0.872	-0.301	-	P27546	Microtubule-associated protein 4	Map4
396	AKNDESsAEIP	0.138	-0.153	-1.472	-0.496	-	P27546	Microtubule-associated protein 4	Map4
405	IPVAQEtVVSE	0.06	-0.252	-1.558	-0.583	-	P27546	Microtubule-associated protein 4	Map4
408	AQETVVsETEV	0.436	-0.04	-0.735	-0.113	-	P27546	Microtubule-associated protein 4	Map4
410	ETVVSEtEVVL	0.206	0.216	-0.737	-0.105	-	P27546	Microtubule-associated protein 4	Map4
416	TEVVLAtEVVL	0.098	0.012	-1.261	-0.384	-	P27546	Microtubule-associated protein 4	Map4
422	TEVVLPsDPIT	0.264	0.247	-0.803	-0.097	-	P27546	Microtubule-associated protein 4	Map4
426	LPSDPItTLTK	0.082	-0.319	-1.286	-0.508	-	P27546	Microtubule-associated protein 4	Map4
427	PSDPITtLTKD	0.308	-0.079	-0.364	-0.045	-	P27546	Microtubule-associated protein 4	Map4
429	DPITTLtKDVT	0.091	-0.092	-1.213	-0.404	-	P27546	Microtubule-associated protein 4	Map4
433	TLTKDVtLPLE	0.911	0.645	0.934	0.83	-	P27546	Microtubule-associated protein 4	Map4
444	AERPLVtDMTP	0.318	0.008	-0.918	-0.197	-	P27546	Microtubule-associated protein 4	Map4
447	PLVTDMtPSLE	0.122	-0.22	-1.151	-0.416	-	P27546	Microtubule-associated protein 4	Map4
449	VTDMTPsLETE	0.163	-0.183	-0.924	-0.315	-	P27546	Microtubule-associated protein 4	Map4
452	MTPSLEtEMTL	0.139	-0.093	-1.261	-0.405	-	P27546	Microtubule-associated protein 4	Map4
455	SLETEMtLGKE	0.473	0.141	-0.388	0.076	-	P27546	Microtubule-associated protein 4	Map4
460	MTLGKEtAPPT	0.385	0.349	-0.426	0.103	-	P27546	Microtubule-associated protein 4	Map4
464	KETAPPtETNL	0.18	-0.121	-0.993	-0.311	-	P27546	Microtubule-associated protein 4	Map4
466	TAPPTEtNLGM	0.034	-0.383	-1.812	-0.72	-	P27546	Microtubule-associated protein 4	Map4
475	GMAKDMsPLPE	0.151	-0.153	-1.042	-0.348	-	P27546	Microtubule-associated protein 4	Map4
480	MSPLPEsEVTL	0.114	-0.115	-1.108	-0.37	-	P27546	Microtubule-associated protein 4	Map4
483	LPESEVtLGKD	0.442	-0.046	-0.338	0.02	-	P27546	Microtubule-associated protein 4	Map4
494	VVILPEtKVAE	0.098	-0.154	-1.105	-0.387	-	P27546	Microtubule-associated protein 4	Map4
503	AEFNNVtPLSE	0.054	-0.488	-1.564	-0.666	-	P27546	Microtubule-associated protein 4	Map4
506	NNVTPLsEEEV	0.086	-0.184	-1.304	-0.467	-	P27546	Microtubule-associated protein 4	Map4
511	LSEEEVtSVKD	0.133	-0.221	-1.14	-0.409	-	P27546	Microtubule-associated protein 4	Map4
512	SEEEVTsVKDM	0.145	-0.124	-1.07	-0.35	-	P27546	Microtubule-associated protein 4	Map4
517	TSVKDMsPSAE	0.131	-0.301	-1.091	-0.42	-	P27546	Microtubule-associated protein 4	Map4
519	VKDMSPsAETE	0.381	0.052	-0.483	-0.017	-	P27546	Microtubule-associated protein 4	Map4
522	MSPSAEtEAPL	0.14	-0.101	-1.041	-0.334	-	P27546	Microtubule-associated protein 4	Map4
534	KNADLHsGTEL	0.191	-0.071	-0.926	-0.269	-	P27546	Microtubule-associated protein 4	Map4
536	ADLHSGtELIV	0.166	-0.008	-1.043	-0.295	-	P27546	Microtubule-associated protein 4	Map4
543	ELIVDNsMAPA	0.131	0.024	-1.037	-0.294	-	P27546	Microtubule-associated protein 4	Map4
548	NSMAPAsDLAL	0.2	-0.016	-0.72	-0.179	-	P27546	Microtubule-associated protein 4	Map4
556	LALPLEtKVAT	0.074	-0.234	-1.131	-0.43	-	P27546	Microtubule-associated protein 4	Map4
560	LETKVAtVPIK	0.77	0.491	0.264	0.508	-	P27546	Microtubule-associated protein 4	Map4
568	PIKDKGtVQTE	0.183	-0.058	-0.877	-0.251	-	P27546	Microtubule-associated protein 4	Map4
571	DKGTVQtEEKP	0.191	-0.032	-1.009	-0.283	-	P27546	Microtubule-associated protein 4	Map4
579	EKPREDsQLAS	0.414	0.684	-0.416	0.228	-	P27546	Microtubule-associated protein 4	Map4
583	EDSQLAsMQHK	0.089	-0.172	-1.09	-0.391	-	P27546	Microtubule-associated protein 4	Map4
590	MQHKGQsTVPP	0.08	-0.147	-1.074	-0.38	-	P27546	Microtubule-associated protein 4	Map4
591	QHKGQStVPPC	0.203	0.265	-0.86	-0.131	-	P27546	Microtubule-associated protein 4	Map4
596	STVPPCtASPE	0.069	-0.363	-1.744	-0.679	-	P27546	Microtubule-associated protein 4	Map4
598	VPPCTAsPEPV	0.046	-0.474	-1.94	-0.79	-	P27546	Microtubule-associated protein 4	Map4
609	KAAEQMsTLPI	0.091	-0.07	-1.134	-0.371	-	P27546	Microtubule-associated protein 4	Map4
610	AAEQMStLPID	0.741	0.363	0.385	0.496	-	P27546	Microtubule-associated protein 4	Map4
617	LPIDAPsPLEN	0.084	-0.321	-1.475	-0.571	-	P27546	Microtubule-associated protein 4	Map4
627	NLEQKEtPGSQ	0.086	-0.385	-1.267	-0.522	-	P27546	Microtubule-associated protein 4	Map4
630	QKETPGsQPSE	0.297	0.179	-0.619	-0.048	-	P27546	Microtubule-associated protein 4	Map4
633	TPGSQPsEPCS	0.202	0.329	-0.772	-0.081	-	P27546	Microtubule-associated protein 4	Map4
637	QPSEPCsGVSR	0.05	-0.312	-1.532	-0.598	-	P27546	Microtubule-associated protein 4	Map4
640	EPCSGVsRQEE	0.136	-0.292	-1.224	-0.46	-	P27546	Microtubule-associated protein 4	Map4
652	KAAVGVtGNDI	0.234	-0.109	-0.499	-0.125	-	P27546	Microtubule-associated protein 4	Map4
657	VTGNDItTPPN	0.323	0.274	-0.393	0.068	-	P27546	Microtubule-associated protein 4	Map4
658	TGNDITtPPNK	0.264	0.107	-0.623	-0.084	-	P27546	Microtubule-associated protein 4	Map4
667	NKEPPPsPEKK	0.072	-0.55	-1.264	-0.58	-	P27546	Microtubule-associated protein 4	Map4
677	KAKPLAtTQPA	0.137	-0.235	-1.016	-0.371	-	P27546	Microtubule-associated protein 4	Map4
678	AKPLATtQPAK	0.722	0.49	0.093	0.435	-	P27546	Microtubule-associated protein 4	Map4
683	TTQPAKtSTSK	0.217	-0.1	-0.784	-0.222	-	P27546	Microtubule-associated protein 4	Map4
684	TQPAKTsTSKA	0.037	-0.367	-1.502	-0.611	-	P27546	Microtubule-associated protein 4	Map4
685	QPAKTStSKAK	0.109	-0.119	-0.855	-0.289	-	P27546	Microtubule-associated protein 4	Map4
686	PAKTSTsKAKT	0.27	0.034	-0.423	-0.04	-	P27546	Microtubule-associated protein 4	Map4
690	STSKAKtQPTS	0.714	0.44	-0.022	0.377	-	P27546	Microtubule-associated protein 4	Map4
693	KAKTQPtSLPK	0.061	-0.358	-1.586	-0.628	-	P27546	Microtubule-associated protein 4	Map4
694	AKTQPTsLPKQ	0.761	0.46	0.57	0.597	-	P27546	Microtubule-associated protein 4	Map4
702	PKQPAPtTSGG	0.325	-0.039	-0.504	-0.073	-	P27546	Microtubule-associated protein 4	Map4
703	KQPAPTtSGGL	0.097	-0.258	-0.898	-0.353	-	P27546	Microtubule-associated protein 4	Map4
704	QPAPTTsGGLN	0.105	-0.088	-0.841	-0.275	-	P27546	Microtubule-associated protein 4	Map4
713	LNKKPMsLASG	0.327	0.016	-0.156	0.062	-	P27546	Microtubule-associated protein 4	Map4
716	KPMSLAsGSVP	0.038	-0.298	-1.714	-0.658	-	P27546	Microtubule-associated protein 4	Map4
718	MSLASGsVPAA	0.76	0.656	0.662	0.693	-	P27546	Microtubule-associated protein 4	Map4
731	KRPAAAtATAR	0.47	0.279	-0.413	0.112	-	P27546	Microtubule-associated protein 4	Map4
733	PAAATAtARPS	0.146	-0.133	-0.986	-0.324	-	P27546	Microtubule-associated protein 4	Map4
737	TATARPsTLPA	0.144	-0.18	-0.952	-0.33	-	P27546	Microtubule-associated protein 4	Map4
738	ATARPStLPAR	0.908	1.309	1.444	1.22	-	P27546	Microtubule-associated protein 4	Map4
750	VKPKPItEAKV	0.264	-0.089	-0.815	-0.213	-	P27546	Microtubule-associated protein 4	Map4
759	KVAEKRtSPSK	0.095	0.201	-1.019	-0.241	-	P27546	Microtubule-associated protein 4	Map4
760	VAEKRTsPSKP	0.107	-0.373	-1.244	-0.503	-	P27546	Microtubule-associated protein 4	Map4
762	EKRTSPsKPSS	0.814	0.833	0.696	0.781	-	P27546	Microtubule-associated protein 4	Map4
765	TSPSKPsSAPA	0.034	-0.546	-1.795	-0.769	-	P27546	Microtubule-associated protein 4	Map4
766	SPSKPSsAPAL	0.431	0.388	-0.232	0.196	-	P27546	Microtubule-associated protein 4	Map4
776	LKPGPKtTPTV	0.554	0.407	0.098	0.353	-	P27546	Microtubule-associated protein 4	Map4
777	KPGPKTtPTVS	0.028	-0.548	-1.88	-0.8	-	P27546	Microtubule-associated protein 4	Map4
779	GPKTTPtVSKA	0.119	-0.152	-1.13	-0.388	-	P27546	Microtubule-associated protein 4	Map4
781	KTTPTVsKATS	0.128	-0.217	-1.017	-0.369	-	P27546	Microtubule-associated protein 4	Map4
784	PTVSKAtSPST	0.248	0.245	-0.685	-0.064	-	P27546	Microtubule-associated protein 4	Map4
785	TVSKATsPSTL	0.116	-0.3	-1.029	-0.404	-	P27546	Microtubule-associated protein 4	Map4
787	SKATSPsTLVS	0.224	0.071	-0.732	-0.146	-	P27546	Microtubule-associated protein 4	Map4
788	KATSPStLVST	0.053	-0.326	-1.216	-0.496	-	P27546	Microtubule-associated protein 4	Map4
791	SPSTLVsTGPS	0.107	-0.283	-1.393	-0.523	-	P27546	Microtubule-associated protein 4	Map4
792	PSTLVStGPSS	0.206	0.227	-0.645	-0.071	-	P27546	Microtubule-associated protein 4	Map4
795	LVSTGPsSRSP	0.028	-0.438	-1.714	-0.708	-	P27546	Microtubule-associated protein 4	Map4
796	VSTGPSsRSPA	0.045	-0.517	-1.509	-0.66	-	P27546	Microtubule-associated protein 4	Map4
798	TGPSSRsPATT	0.045	-0.429	-1.522	-0.635	-	P27546	Microtubule-associated protein 4	Map4
801	SSRSPAtTLPK	0.123	-0.172	-1.159	-0.403	-	P27546	Microtubule-associated protein 4	Map4
802	SRSPATtLPKR	0.696	0.699	0.409	0.601	-	P27546	Microtubule-associated protein 4	Map4
808	TLPKRPtSIKT	0.224	-0.001	-0.653	-0.144	-	P27546	Microtubule-associated protein 4	Map4
809	LPKRPTsIKTE	0.421	0.619	0.23	0.423	-	P27546	Microtubule-associated protein 4	Map4
812	RPTSIKtEGKP	0.236	0.013	-0.458	-0.07	-	P27546	Microtubule-associated protein 4	Map4
823	ADVKRMtAKSA	0.28	0.124	-0.64	-0.078	-	P27546	Microtubule-associated protein 4	Map4
826	KRMTAKsASAD	0.449	0.387	-0.155	0.227	-	P27546	Microtubule-associated protein 4	Map4
828	MTAKSAsADLS	0.734	0.413	0.16	0.436	-	P27546	Microtubule-associated protein 4	Map4
832	SASADLsRSKT	0.031	-0.525	-2.045	-0.846	-	P27546	Microtubule-associated protein 4	Map4
834	SADLSRsKTTS	0.143	-0.049	-1.176	-0.361	-	P27546	Microtubule-associated protein 4	Map4
836	DLSRSKtTSAS	0.864	1.148	1.033	1.015	-	P27546	Microtubule-associated protein 4	Map4
837	LSRSKTtSASS	0.072	-0.141	-1.266	-0.445	-	P27546	Microtubule-associated protein 4	Map4
838	SRSKTTsASSV	0.108	0.116	-1.362	-0.38	-	P27546	Microtubule-associated protein 4	Map4
840	SKTTSAsSVKR	0.363	0.166	-0.454	0.025	-	P27546	Microtubule-associated protein 4	Map4
841	KTTSASsVKRN	0.161	-0.199	-1.148	-0.395	-	P27546	Microtubule-associated protein 4	Map4
846	SSVKRNtTPTG	0.75	0.563	0.128	0.48	-	P27546	Microtubule-associated protein 4	Map4
847	SVKRNTtPTGA	0.432	0.451	0.019	0.301	-	P27546	Microtubule-associated protein 4	Map4
849	KRNTTPtGAAP	0.075	-0.021	-1.231	-0.392	-	P27546	Microtubule-associated protein 4	Map4
858	APPAGMtSTRV	0.109	-0.271	-1.668	-0.61	-	P27546	Microtubule-associated protein 4	Map4
859	PPAGMTsTRVK	0.17	-0.213	-0.761	-0.268	-	P27546	Microtubule-associated protein 4	Map4
860	PAGMTStRVKP	0.032	-0.349	-1.774	-0.697	-	P27546	Microtubule-associated protein 4	Map4
866	TRVKPMsAPSR	0.655	0.766	0.264	0.562	-	P27546	Microtubule-associated protein 4	Map4
869	KPMSAPsRSSG	0.061	-0.311	-1.577	-0.609	-	P27546	Microtubule-associated protein 4	Map4
871	MSAPSRsSGAL	0.399	0.26	-0.091	0.189	-	P27546	Microtubule-associated protein 4	Map4
872	SAPSRSsGALS	0.043	-0.303	-1.715	-0.658	-	P27546	Microtubule-associated protein 4	Map4
876	RSSGALsVDKK	0.172	-0.081	-0.784	-0.231	-	P27546	Microtubule-associated protein 4	Map4
882	SVDKKPtSTKP	0.067	-0.332	-1.648	-0.638	-	P27546	Microtubule-associated protein 4	Map4
883	VDKKPTsTKPS	0.115	-0.279	-0.903	-0.356	-	P27546	Microtubule-associated protein 4	Map4
884	DKKPTStKPSS	0.396	0.392	-0.207	0.194	-	P27546	Microtubule-associated protein 4	Map4
887	PTSTKPsSSAP	0.067	-0.303	-1.44	-0.559	-	P27546	Microtubule-associated protein 4	Map4
888	TSTKPSsSAPR	0.094	-0.363	-1.131	-0.467	-	P27546	Microtubule-associated protein 4	Map4
889	STKPSSsAPRV	0.604	0.48	-0.344	0.247	-	P27546	Microtubule-associated protein 4	Map4
894	SSAPRVsRLAT	0.193	-0.146	-0.822	-0.259	-	P27546	Microtubule-associated protein 4	Map4
898	RVSRLAtTVSA	0.379	0.756	-0.172	0.321	-	P27546	Microtubule-associated protein 4	Map4
899	VSRLATtVSAP	0.305	0.15	-0.449	0.002	-	P27546	Microtubule-associated protein 4	Map4
901	RLATTVsAPDL	0.853	0.765	0.634	0.751	-	P27546	Microtubule-associated protein 4	Map4
907	SAPDLKsVRSK	0.059	-0.321	-1.511	-0.591	-	P27546	Microtubule-associated protein 4	Map4
910	DLKSVRsKVGS	0.246	-0.072	-0.877	-0.234	-	P27546	Microtubule-associated protein 4	Map4
914	VRSKVGsTENI	0.305	0.162	-0.727	-0.087	-	P27546	Microtubule-associated protein 4	Map4
915	RSKVGStENIK	0.139	-0.131	-0.891	-0.294	-	P27546	Microtubule-associated protein 4	Map4
933	AKVEKKtEAAT	0.207	0.032	-0.564	-0.108	-	P27546	Microtubule-associated protein 4	Map4
937	KKTEAAtTAGK	0.279	-0.063	-0.619	-0.135	-	P27546	Microtubule-associated protein 4	Map4
938	KTEAATtAGKP	0.262	-0.067	-0.835	-0.214	-	P27546	Microtubule-associated protein 4	Map4
948	PEPNAVtKAAG	0.301	-0.006	-0.447	-0.051	-	P27546	Microtubule-associated protein 4	Map4
953	VTKAAGsIASA	0.1	-0.27	-1.111	-0.427	-	P27546	Microtubule-associated protein 4	Map4
956	AAGSIAsAQKP	0.083	-0.208	-1.34	-0.488	-	P27546	Microtubule-associated protein 4	Map4
969	GKVQIVsKKVS	0.478	0.074	-0.108	0.148	-	P27546	Microtubule-associated protein 4	Map4
973	IVSKKVsYSHI	0.211	-0.168	-0.581	-0.179	-	P27546	Microtubule-associated protein 4	Map4
975	SKKVSYsHIQS	0.376	0.252	-0.035	0.198	-	P27546	Microtubule-associated protein 4	Map4
979	SYSHIQsKCGS	0.104	-0.263	-1.035	-0.398	-	P27546	Microtubule-associated protein 4	Map4
983	IQSKCGsKDNI	0.488	0.05	-0.137	0.133	-	P27546	Microtubule-associated protein 4	Map4
1006	NKKVDIsKVSS	0.154	-0.068	-0.806	-0.24	-	P27546	Microtubule-associated protein 4	Map4
1009	VDISKVsSKCG	0.078	-0.257	-1.345	-0.508	-	P27546	Microtubule-associated protein 4	Map4
1010	DISKVSsKCGS	0.208	-0.192	-1.011	-0.332	-	P27546	Microtubule-associated protein 4	Map4
1014	VSSKCGsKANI	0.307	-0.125	-0.703	-0.174	-	P27546	Microtubule-associated protein 4	Map4
1031	GDVKIEsQKLN	0.167	-0.121	-1.132	-0.362	-	P27546	Microtubule-associated protein 4	Map4
1046	AQAKVGsLDNV	0.414	0.061	-0.549	-0.025	-	P27546	Microtubule-associated protein 4	Map4
1061	AGGAVKtEGGG	0.36	-0.002	-0.32	0.013	-	P27546	Microtubule-associated protein 4	Map4
1066	KTEGGGsEALP	0.049	-0.291	-1.522	-0.588	-	P27546	Microtubule-associated protein 4	Map4
1093	PDAGAPtSASG	0.07	-0.238	-1.159	-0.442	-	P27546	Microtubule-associated protein 4	Map4
1094	DAGAPTsASGL	0.096	-0.263	-1.253	-0.473	-	P27546	Microtubule-associated protein 4	Map4
1096	GAPTSAsGLSG	0.171	0.005	-0.995	-0.273	-	P27546	Microtubule-associated protein 4	Map4
1099	TSASGLsGHTT	0.04	-0.416	-1.443	-0.606	-	P27546	Microtubule-associated protein 4	Map4
1102	SGLSGHtTLSG	0.049	-0.206	-1.526	-0.561	-	P27546	Microtubule-associated protein 4	Map4
1103	GLSGHTtLSGG	0.493	0.12	-0.115	0.166	-	P27546	Microtubule-associated protein 4	Map4
1105	SGHTTLsGGGD	0.074	-0.216	-1.22	-0.454	-	P27546	Microtubule-associated protein 4	Map4
1115	DQREPQtLDSQ	0.271	0.133	-0.408	-0.001	-	P27546	Microtubule-associated protein 4	Map4
1118	EPQTLDsQIQE	0.062	-0.307	-1.623	-0.623	-	P27546	Microtubule-associated protein 4	Map4
1123	DSQIQEtSI--	0.085	-0.016	-1.435	-0.455	-	P27546	Microtubule-associated protein 4	Map4
1124	SQIQETsI---	0.098	-0.018	-1.055	-0.325	-	P27546	Microtubule-associated protein 4	Map4
4	#NAME?	0.272	-0.293	-0.607	-0.209	-	P27641	X-ray repair cross-complementing protein 5	Xrcc5
23	GVAMGNsFPGE	0.653	0.443	0.218	0.438	-	P27641	X-ray repair cross-complementing protein 5	Xrcc5
29	SFPGEEsPIEQ	0.029	-0.547	-1.925	-0.814	-	P27641	X-ray repair cross-complementing protein 5	Xrcc5
39	QAKKVMtMFVQ	0.439	0.219	-0.407	0.084	-	P27641	X-ray repair cross-complementing protein 5	Xrcc5
48	VQRQVFsESKD	0.349	0.215	-0.232	0.111	-	P27641	X-ray repair cross-complementing protein 5	Xrcc5
50	RQVFSEsKDEI	0.559	0.298	0.081	0.313	-	P27641	X-ray repair cross-complementing protein 5	Xrcc5
61	ALVLYGtDGTD	0.382	0.041	-0.672	-0.083	-	P27641	X-ray repair cross-complementing protein 5	Xrcc5
64	LYGTDGtDNAL	0.201	0.015	-0.77	-0.185	-	P27641	X-ray repair cross-complementing protein 5	Xrcc5
78	DQYQNItVCRH	0.132	-0.343	-1.155	-0.455	-	P27641	X-ray repair cross-complementing protein 5	Xrcc5
101	GNKIQPsSQQA	0.147	-0.18	-0.899	-0.311	-	P27641	X-ray repair cross-complementing protein 5	Xrcc5
102	NKIQPSsQQAD	0.302	-0.02	-0.44	-0.053	-	P27641	X-ray repair cross-complementing protein 5	Xrcc5
122	DLIQREtIGKK	0.482	0.114	-0.419	0.059	-	P27641	X-ray repair cross-complementing protein 5	Xrcc5
136	KHIEVFtDLSS	0.048	-0.114	-1.904	-0.657	-	P27641	X-ray repair cross-complementing protein 5	Xrcc5
139	EVFTDLsSPFS	0.132	0.22	-0.897	-0.182	-	P27641	X-ray repair cross-complementing protein 5	Xrcc5
140	VFTDLSsPFSQ	0.029	-0.524	-1.768	-0.754	-	P27641	X-ray repair cross-complementing protein 5	Xrcc5
143	DLSSPFsQDQL	0.291	-0.076	-0.682	-0.156	-	P27641	X-ray repair cross-complementing protein 5	Xrcc5
157	ICNLKKsGISL	0.128	-0.061	-0.896	-0.276	-	P27641	X-ray repair cross-complementing protein 5	Xrcc5
160	LKKSGIsLQFF	0.284	-0.045	-0.316	-0.026	-	P27641	X-ray repair cross-complementing protein 5	Xrcc5
183	ERGDLDsGLDH	0.057	-0.113	-1.661	-0.572	-	P27641	X-ray repair cross-complementing protein 5	Xrcc5
191	LDHLKPsFPQK	0.27	0.206	-0.416	0.02	-	P27641	X-ray repair cross-complementing protein 5	Xrcc5
198	FPQKGLtEQQK	0.233	0.024	-0.646	-0.13	-	P27641	X-ray repair cross-complementing protein 5	Xrcc5
209	EGIRMVtRVML	0.542	0.68	0.124	0.449	-	P27641	X-ray repair cross-complementing protein 5	Xrcc5
214	VTRVMLsLEGE	0.292	0.029	-0.516	-0.065	-	P27641	X-ray repair cross-complementing protein 5	Xrcc5
226	GLDEIYsFSES	0.235	0.134	-0.51	-0.047	-	P27641	X-ray repair cross-complementing protein 5	Xrcc5
228	DEIYSFsESLR	0.385	0.291	-0.333	0.114	-	P27641	X-ray repair cross-complementing protein 5	Xrcc5
230	IYSFSEsLRQL	0.685	0.231	0.266	0.394	-	P27641	X-ray repair cross-complementing protein 5	Xrcc5
244	KKIERRsMPWP	0.537	0.704	-0.153	0.363	-	P27641	X-ray repair cross-complementing protein 5	Xrcc5
252	PWPCQLtIGPN	0.098	-0.134	-1.257	-0.431	-	P27641	X-ray repair cross-complementing protein 5	Xrcc5
258	TIGPNLsIKIV	0.073	-0.183	-1.24	-0.45	-	P27641	X-ray repair cross-complementing protein 5	Xrcc5
266	KIVAYKsIVQE	0.227	-0.055	-0.596	-0.142	-	P27641	X-ray repair cross-complementing protein 5	Xrcc5
275	QEKFKKsWVVV	0.221	0.108	-0.814	-0.162	-	P27641	X-ray repair cross-complementing protein 5	Xrcc5
283	VVVDARtLKKE	0.183	0.008	-0.879	-0.229	-	P27641	X-ray repair cross-complementing protein 5	Xrcc5
293	EDIQKEtVYCL	0.062	-0.103	-1.229	-0.423	-	P27641	X-ray repair cross-complementing protein 5	Xrcc5
303	LNDDDEtEVSK	0.054	-0.265	-1.504	-0.571	-	P27641	X-ray repair cross-complementing protein 5	Xrcc5
306	DDETEVsKEDT	0.246	-0.218	-0.93	-0.301	-	P27641	X-ray repair cross-complementing protein 5	Xrcc5
310	EVSKEDtIQGY	0.192	-0.18	-0.937	-0.308	-	P27641	X-ray repair cross-complementing protein 5	Xrcc5
318	QGYRYGsDIIP	0.398	0.7	-0.061	0.346	-	P27641	X-ray repair cross-complementing protein 5	Xrcc5
324	SDIIPFsKVDE	0.078	-0.177	-1.16	-0.42	-	P27641	X-ray repair cross-complementing protein 5	Xrcc5
335	EQMKYKsEGKC	0.337	0.134	-0.272	0.066	-	P27641	X-ray repair cross-complementing protein 5	Xrcc5
341	SEGKCFsVLGF	0.154	-0.095	-0.979	-0.307	-	P27641	X-ray repair cross-complementing protein 5	Xrcc5
348	VLGFCKsSQVH	0.324	0.005	-0.593	-0.088	-	P27641	X-ray repair cross-complementing protein 5	Xrcc5
349	LGFCKSsQVHR	0.07	-0.284	-1.387	-0.534	-	P27641	X-ray repair cross-complementing protein 5	Xrcc5
378	AAAVALsSLVH	0.044	-0.282	-1.695	-0.644	-	P27641	X-ray repair cross-complementing protein 5	Xrcc5
379	AAVALSsLVHA	0.09	-0.262	-1.129	-0.434	-	P27641	X-ray repair cross-complementing protein 5	Xrcc5
401	YAYDKRsNPQV	0.263	0.293	-0.907	-0.117	-	P27641	X-ray repair cross-complementing protein 5	Xrcc5
436	LRQYMFsSLKN	0.178	0.181	-0.727	-0.123	-	P27641	X-ray repair cross-complementing protein 5	Xrcc5
437	RQYMFSsLKNN	0.188	-0.014	-0.8	-0.209	-	P27641	X-ray repair cross-complementing protein 5	Xrcc5
445	KNNKKCtPTEA	0.14	-0.461	-1.383	-0.568	-	P27641	X-ray repair cross-complementing protein 5	Xrcc5
447	NKKCTPtEAQL	0.369	0.084	-0.334	0.04	-	P27641	X-ray repair cross-complementing protein 5	Xrcc5
452	PTEAQLsAIDD	0.214	-0.016	-0.783	-0.195	-	P27641	X-ray repair cross-complementing protein 5	Xrcc5
460	IDDLIDsMSLV	0.071	-0.193	-1.579	-0.567	-	P27641	X-ray repair cross-complementing protein 5	Xrcc5
462	DLIDSMsLVKK	0.704	0.462	0.161	0.442	-	P27641	X-ray repair cross-complementing protein 5	Xrcc5
479	VEDLFPtSKIP	0.065	-0.348	-1.676	-0.653	-	P27641	X-ray repair cross-complementing protein 5	Xrcc5
480	EDLFPTsKIPN	0.064	-0.248	-0.94	-0.375	-	P27641	X-ray repair cross-complementing protein 5	Xrcc5
520	NMLDPPtEMKA	0.117	-0.038	-0.955	-0.292	-	P27641	X-ray repair cross-complementing protein 5	Xrcc5
528	MKAKCEsPLSK	0.219	-0.252	-0.878	-0.303	-	P27641	X-ray repair cross-complementing protein 5	Xrcc5
531	KCESPLsKVKT	0.064	-0.313	-1.363	-0.537	-	P27641	X-ray repair cross-complementing protein 5	Xrcc5
535	PLSKVKtLFPL	0.748	0.267	0.483	0.5	-	P27641	X-ray repair cross-complementing protein 5	Xrcc5
540	KTLFPLtEVIK	0.143	-0.173	-1.003	-0.344	-	P27641	X-ray repair cross-complementing protein 5	Xrcc5
550	KKKNQVtAQDV	0.557	0.152	-0.338	0.124	-	P27641	X-ray repair cross-complementing protein 5	Xrcc5
570	AAKKYKtEKEE	0.569	0.092	-0.091	0.19	-	P27641	X-ray repair cross-complementing protein 5	Xrcc5
578	KEEDHIsISSL	0.087	-0.166	-1.319	-0.466	-	P27641	X-ray repair cross-complementing protein 5	Xrcc5
580	EDHISIsSLAE	0.097	0.009	-0.929	-0.274	-	P27641	X-ray repair cross-complementing protein 5	Xrcc5
581	DHISISsLAEG	0.185	-0.098	-1.054	-0.322	-	P27641	X-ray repair cross-complementing protein 5	Xrcc5
588	LAEGNItKVGS	0.138	-0.195	-0.709	-0.255	-	P27641	X-ray repair cross-complementing protein 5	Xrcc5
592	NITKVGsVNPV	0.325	0.015	-0.68	-0.113	-	P27641	X-ray repair cross-complementing protein 5	Xrcc5
609	VRQKIAsFEEA	0.594	0.366	0.122	0.361	-	P27641	X-ray repair cross-complementing protein 5	Xrcc5
614	ASFEEAsLQLI	0.371	0.039	-0.513	-0.034	-	P27641	X-ray repair cross-complementing protein 5	Xrcc5
619	ASLQLIsHIEQ	0.182	-0.201	-0.857	-0.292	-	P27641	X-ray repair cross-complementing protein 5	Xrcc5
627	IEQFLDtNETL	0.137	-0.151	-1.342	-0.452	-	P27641	X-ray repair cross-complementing protein 5	Xrcc5
630	FLDTNEtLYFM	0.343	0.056	-0.502	-0.034	-	P27641	X-ray repair cross-complementing protein 5	Xrcc5
636	TLYFMKsMDCI	0.533	0.314	0.077	0.308	-	P27641	X-ray repair cross-complementing protein 5	Xrcc5
651	EEAIQFsEEQR	0.118	0.02	-0.842	-0.235	-	P27641	X-ray repair cross-complementing protein 5	Xrcc5
658	EEQRFNsFLEA	0.717	0.935	0.264	0.639	-	P27641	X-ray repair cross-complementing protein 5	Xrcc5
685	VVQDGVtLITK	0.261	-0.041	-0.515	-0.099	-	P27641	X-ray repair cross-complementing protein 5	Xrcc5
688	DGVTLItKDEG	0.271	-0.083	-0.788	-0.2	-	P27641	X-ray repair cross-complementing protein 5	Xrcc5
695	KDEGPGsSITA	0.036	-0.442	-1.423	-0.61	-	P27641	X-ray repair cross-complementing protein 5	Xrcc5
696	DEGPGSsITAE	0.06	-0.316	-1.511	-0.589	-	P27641	X-ray repair cross-complementing protein 5	Xrcc5
698	GPGSSItAEEA	0.333	0.127	-0.589	-0.043	-	P27641	X-ray repair cross-complementing protein 5	Xrcc5
703	ITAEEAtKFLA	0.23	-0.097	-0.714	-0.193	-	P27641	X-ray repair cross-complementing protein 5	Xrcc5
716	DKAKEDtTGPE	0.458	-0.1	-0.641	-0.094	-	P27641	X-ray repair cross-complementing protein 5	Xrcc5
717	KAKEDTtGPEE	0.384	0.284	-0.333	0.112	-	P27641	X-ray repair cross-complementing protein 5	Xrcc5
9	ARLLLRsLRVL	0.264	0.195	-0.695	-0.079	-	P51174	Long-chain specific acyl-CoA dehydrogenase, mitochondrial	Acadl
17	RVLKARsAPRP	0.666	0.526	-0.147	0.349	-	P51174	Long-chain specific acyl-CoA dehydrogenase, mitochondrial	Acadl
24	APRPPPsARCS	0.183	-0.065	-0.993	-0.292	-	P51174	Long-chain specific acyl-CoA dehydrogenase, mitochondrial	Acadl
28	PPSARCsHSGA	0.352	-0.068	-0.668	-0.128	-	P51174	Long-chain specific acyl-CoA dehydrogenase, mitochondrial	Acadl
30	SARCSHsGAEA	0.569	0.338	-0.194	0.237	-	P51174	Long-chain specific acyl-CoA dehydrogenase, mitochondrial	Acadl
38	AEARLEtPSAK	0.21	0.35	-0.709	-0.049	-	P51174	Long-chain specific acyl-CoA dehydrogenase, mitochondrial	Acadl
40	ARLETPsAKKL	0.091	0.124	-1.138	-0.308	-	P51174	Long-chain specific acyl-CoA dehydrogenase, mitochondrial	Acadl
45	PSAKKLtDVGI	0.257	-0.066	-0.548	-0.119	-	P51174	Long-chain specific acyl-CoA dehydrogenase, mitochondrial	Acadl
54	GIRRIFsSEHD	0.807	1.175	0.995	0.992	-	P51174	Long-chain specific acyl-CoA dehydrogenase, mitochondrial	Acadl
55	IRRIFSsEHDI	0.698	0.576	0.191	0.488	-	P51174	Long-chain specific acyl-CoA dehydrogenase, mitochondrial	Acadl
63	HDIFREsVRKF	0.142	-0.009	-0.929	-0.265	-	P51174	Long-chain specific acyl-CoA dehydrogenase, mitochondrial	Acadl
77	EVIPHHtEWEK	0.349	0.207	-0.482	0.025	-	P51174	Long-chain specific acyl-CoA dehydrogenase, mitochondrial	Acadl
86	EKAGEVsREVW	0.218	-0.062	-0.748	-0.197	-	P51174	Long-chain specific acyl-CoA dehydrogenase, mitochondrial	Acadl
116	IGGDLLsTAVT	0.053	-0.267	-1.485	-0.567	-	P51174	Long-chain specific acyl-CoA dehydrogenase, mitochondrial	Acadl
117	GGDLLStAVTW	0.08	-0.139	-1.469	-0.509	-	P51174	Long-chain specific acyl-CoA dehydrogenase, mitochondrial	Acadl
120	LLSTAVtWEEQ	0.452	0.132	-0.374	0.07	-	P51174	Long-chain specific acyl-CoA dehydrogenase, mitochondrial	Acadl
127	WEEQAYsNCTG	0.226	-0.105	-0.693	-0.191	-	P51174	Long-chain specific acyl-CoA dehydrogenase, mitochondrial	Acadl
130	QAYSNCtGPGF	0.374	0.227	-0.301	0.1	-	P51174	Long-chain specific acyl-CoA dehydrogenase, mitochondrial	Acadl
135	CTGPGFsLHSD	0.201	-0.027	-0.591	-0.139	-	P51174	Long-chain specific acyl-CoA dehydrogenase, mitochondrial	Acadl
138	PGFSLHsDIVM	0.206	0.058	-0.761	-0.166	-	P51174	Long-chain specific acyl-CoA dehydrogenase, mitochondrial	Acadl
150	YIANYGtKEQI	0.205	-0.008	-0.372	-0.058	-	P51174	Long-chain specific acyl-CoA dehydrogenase, mitochondrial	Acadl
162	KFIPQMtAGKC	0.157	0.034	-1.087	-0.299	-	P51174	Long-chain specific acyl-CoA dehydrogenase, mitochondrial	Acadl
173	IGAIAMtEPGA	0.814	0.674	0.866	0.785	-	P51174	Long-chain specific acyl-CoA dehydrogenase, mitochondrial	Acadl
179	TEPGAGsDLQG	0.102	-0.176	-1.37	-0.481	-	P51174	Long-chain specific acyl-CoA dehydrogenase, mitochondrial	Acadl
186	DLQGVRtNAKR	0.183	-0.037	-1.202	-0.352	-	P51174	Long-chain specific acyl-CoA dehydrogenase, mitochondrial	Acadl
191	RTNAKRsGSDW	0.087	-0.178	-1.463	-0.518	-	P51174	Long-chain specific acyl-CoA dehydrogenase, mitochondrial	Acadl
193	NAKRSGsDWIL	0.87	1.101	0.783	0.918	-	P51174	Long-chain specific acyl-CoA dehydrogenase, mitochondrial	Acadl
200	DWILNGsKVFI	0.153	-0.095	-1.029	-0.324	-	P51174	Long-chain specific acyl-CoA dehydrogenase, mitochondrial	Acadl
205	GSKVFItNGWL	0.283	-0.003	-0.698	-0.14	-	P51174	Long-chain specific acyl-CoA dehydrogenase, mitochondrial	Acadl
210	ITNGWLsDLVI	0.197	0.007	-0.864	-0.22	-	P51174	Long-chain specific acyl-CoA dehydrogenase, mitochondrial	Acadl
219	VIVVAVtNREA	0.322	-0.044	-0.676	-0.133	-	P51174	Long-chain specific acyl-CoA dehydrogenase, mitochondrial	Acadl
225	TNREARsPAHG	0.07	-0.272	-1.333	-0.512	-	P51174	Long-chain specific acyl-CoA dehydrogenase, mitochondrial	Acadl
231	SPAHGIsLFLV	0.164	-0.105	-0.909	-0.283	-	P51174	Long-chain specific acyl-CoA dehydrogenase, mitochondrial	Acadl
258	GMKAQDtAELF	0.138	0.041	-1.196	-0.339	-	P51174	Long-chain specific acyl-CoA dehydrogenase, mitochondrial	Acadl
301	IAELAIsACEF	0.275	-0.092	-0.793	-0.203	-	P51174	Long-chain specific acyl-CoA dehydrogenase, mitochondrial	Acadl
310	EFMFEEtRNYV	0.151	-0.139	-1.303	-0.43	-	P51174	Long-chain specific acyl-CoA dehydrogenase, mitochondrial	Acadl
323	RKAFGKtVAHI	0.366	0.065	-0.055	0.125	-	P51174	Long-chain specific acyl-CoA dehydrogenase, mitochondrial	Acadl
329	TVAHIQtVQHK	0.109	-0.152	-0.574	-0.206	-	P51174	Long-chain specific acyl-CoA dehydrogenase, mitochondrial	Acadl
339	KLAELKtHICV	0.216	0.078	-0.741	-0.149	-	P51174	Long-chain specific acyl-CoA dehydrogenase, mitochondrial	Acadl
344	KTHICVtRAFV	0.143	-0.298	-1.539	-0.565	-	P51174	Long-chain specific acyl-CoA dehydrogenase, mitochondrial	Acadl
350	TRAFVDsCLQL	0.225	0.162	-0.812	-0.142	-	P51174	Long-chain specific acyl-CoA dehydrogenase, mitochondrial	Acadl
357	CLQLHEtKRLD	0.53	0.137	-0.257	0.136	-	P51174	Long-chain specific acyl-CoA dehydrogenase, mitochondrial	Acadl
362	ETKRLDsGSAS	0.352	0.641	-0.244	0.25	-	P51174	Long-chain specific acyl-CoA dehydrogenase, mitochondrial	Acadl
364	KRLDSGsASMA	0.209	0.191	-0.867	-0.156	-	P51174	Long-chain specific acyl-CoA dehydrogenase, mitochondrial	Acadl
366	LDSGSAsMAKY	0.205	0.142	-0.72	-0.125	-	P51174	Long-chain specific acyl-CoA dehydrogenase, mitochondrial	Acadl
373	MAKYWAsELQN	0.459	0.198	-0.232	0.142	-	P51174	Long-chain specific acyl-CoA dehydrogenase, mitochondrial	Acadl
378	ASELQNsVAYE	0.139	-0.23	-1.406	-0.499	-	P51174	Long-chain specific acyl-CoA dehydrogenase, mitochondrial	Acadl
414	QPIYGGtNEIM	0.053	-0.258	-1.515	-0.573	-	P51174	Long-chain specific acyl-CoA dehydrogenase, mitochondrial	Acadl
428	IARQIVsDS--	0.554	0.279	-0.112	0.24	-	P51174	Long-chain specific acyl-CoA dehydrogenase, mitochondrial	Acadl
430	RQIVSDs----	0.225	0.26	-0.678	-0.065	-	P51174	Long-chain specific acyl-CoA dehydrogenase, mitochondrial	Acadl
9	GYLRAVsSLCR	0.831	1.005	0.619	0.818	-	P54071	Isocitrate dehydrogenase [NADP], mitochondrial	Idh2
10	YLRAVSsLCRA	0.51	0.115	-0.259	0.122	-	P54071	Isocitrate dehydrogenase [NADP], mitochondrial	Idh2
15	SSLCRAsGSAR	0.267	-0.014	-0.711	-0.153	-	P54071	Isocitrate dehydrogenase [NADP], mitochondrial	Idh2
17	LCRASGsARTW	0.529	0.329	-0.255	0.201	-	P54071	Isocitrate dehydrogenase [NADP], mitochondrial	Idh2
20	ASGSARtWAPA	0.076	-0.214	-1.384	-0.507	-	P54071	Isocitrate dehydrogenase [NADP], mitochondrial	Idh2
27	WAPAALtVPSW	0.23	0.302	-0.461	0.023	-	P54071	Isocitrate dehydrogenase [NADP], mitochondrial	Idh2
30	AALTVPsWPEQ	0.471	0.34	-0.412	0.133	-	P54071	Isocitrate dehydrogenase [NADP], mitochondrial	Idh2
59	MDGDEMtRIIW	0.117	-0.043	-1.173	-0.366	-	P54071	Isocitrate dehydrogenase [NADP], mitochondrial	Idh2
92	LPNRDQtNDQV	0.511	0.729	-0.158	0.361	-	P54071	Isocitrate dehydrogenase [NADP], mitochondrial	Idh2
97	QTNDQVtIDSA	0.123	-0.165	-1.171	-0.405	-	P54071	Isocitrate dehydrogenase [NADP], mitochondrial	Idh2
100	DQVTIDsALAT	0.118	-0.142	-1.157	-0.394	-	P54071	Isocitrate dehydrogenase [NADP], mitochondrial	Idh2
104	IDSALAtQKYS	0.076	-0.352	-1.573	-0.616	-	P54071	Isocitrate dehydrogenase [NADP], mitochondrial	Idh2
108	LATQKYsVAVK	0.119	-0.113	-0.724	-0.239	-	P54071	Isocitrate dehydrogenase [NADP], mitochondrial	Idh2
115	VAVKCAtITPD	0.409	-0.09	-0.511	-0.064	-	P54071	Isocitrate dehydrogenase [NADP], mitochondrial	Idh2
117	VKCATItPDEA	0.224	-0.245	-0.741	-0.254	-	P54071	Isocitrate dehydrogenase [NADP], mitochondrial	Idh2
134	LKKMWKsPNGT	0.351	-0.22	-0.1	0.01	-	P54071	Isocitrate dehydrogenase [NADP], mitochondrial	Idh2
138	WKSPNGtIRNI	0.243	-0.161	-0.564	-0.161	-	P54071	Isocitrate dehydrogenase [NADP], mitochondrial	Idh2
146	RNILGGtVFRE	0.072	-0.294	-1.505	-0.576	-	P54071	Isocitrate dehydrogenase [NADP], mitochondrial	Idh2
165	RLVPGWtKPIT	0.553	0.38	-0.011	0.307	-	P54071	Isocitrate dehydrogenase [NADP], mitochondrial	Idh2
169	GWTKPItIGRH	0.297	-0.166	-0.709	-0.193	-	P54071	Isocitrate dehydrogenase [NADP], mitochondrial	Idh2
182	GDQYKAtDFVV	0.254	0.065	-0.945	-0.209	-	P54071	Isocitrate dehydrogenase [NADP], mitochondrial	Idh2
191	VVDRAGtFKLV	0.575	0.844	0.081	0.5	-	P54071	Isocitrate dehydrogenase [NADP], mitochondrial	Idh2
197	TFKLVFtPKDG	0.199	-0.212	-0.709	-0.241	-	P54071	Isocitrate dehydrogenase [NADP], mitochondrial	Idh2
202	FTPKDGsSAKE	0.088	-0.265	-1.518	-0.565	-	P54071	Isocitrate dehydrogenase [NADP], mitochondrial	Idh2
203	TPKDGSsAKEW	0.078	-0.149	-1.348	-0.473	-	P54071	Isocitrate dehydrogenase [NADP], mitochondrial	Idh2
224	GMGMYNtDESI	0.257	0.146	-0.83	-0.142	-	P54071	Isocitrate dehydrogenase [NADP], mitochondrial	Idh2
227	MYNTDEsISGF	0.097	-0.207	-1.296	-0.469	-	P54071	Isocitrate dehydrogenase [NADP], mitochondrial	Idh2
229	NTDESIsGFAH	0.218	0.016	-0.69	-0.152	-	P54071	Isocitrate dehydrogenase [NADP], mitochondrial	Idh2
234	ISGFAHsCFQY	0.521	0.213	-0.219	0.171	-	P54071	Isocitrate dehydrogenase [NADP], mitochondrial	Idh2
239	HSCFQYsIQKK	0.116	-0.044	-0.847	-0.258	-	P54071	Isocitrate dehydrogenase [NADP], mitochondrial	Idh2
249	KWPLYLsTKNT	0.058	-0.177	-1.514	-0.544	-	P54071	Isocitrate dehydrogenase [NADP], mitochondrial	Idh2
250	WPLYLStKNTI	0.142	-0.138	-0.599	-0.198	-	P54071	Isocitrate dehydrogenase [NADP], mitochondrial	Idh2
253	YLSTKNtILKA	0.132	-0.111	-1.031	-0.336	-	P54071	Isocitrate dehydrogenase [NADP], mitochondrial	Idh2
276	FDKHYKtDFDK	0.503	0.106	-0.095	0.171	-	P54071	Isocitrate dehydrogenase [NADP], mitochondrial	Idh2
300	VAQVLKsSGGF	0.122	-0.135	-0.914	-0.309	-	P54071	Isocitrate dehydrogenase [NADP], mitochondrial	Idh2
301	AQVLKSsGGFV	0.05	-0.296	-1.636	-0.627	-	P54071	Isocitrate dehydrogenase [NADP], mitochondrial	Idh2
317	YDGDVQsDILA	0.099	-0.102	-1.084	-0.362	-	P54071	Isocitrate dehydrogenase [NADP], mitochondrial	Idh2
326	LAQGFGsLGLM	0.249	0.008	-0.548	-0.097	-	P54071	Isocitrate dehydrogenase [NADP], mitochondrial	Idh2
331	GSLGLMtSVLV	0.155	0.003	-1.093	-0.312	-	P54071	Isocitrate dehydrogenase [NADP], mitochondrial	Idh2
332	SLGLMTsVLVC	0.088	-0.138	-1.373	-0.474	-	P54071	Isocitrate dehydrogenase [NADP], mitochondrial	Idh2
341	VCPDGKtIEAE	0.124	-0.102	-0.981	-0.319	-	P54071	Isocitrate dehydrogenase [NADP], mitochondrial	Idh2
350	AEAAHGtVTRH	0.133	-0.355	-1.548	-0.59	-	P54071	Isocitrate dehydrogenase [NADP], mitochondrial	Idh2
352	AAHGTVtRHYR	0.123	-0.22	-1.272	-0.456	-	P54071	Isocitrate dehydrogenase [NADP], mitochondrial	Idh2
364	HQKGRPtSTNP	0.203	0.052	-0.658	-0.134	-	P54071	Isocitrate dehydrogenase [NADP], mitochondrial	Idh2
365	QKGRPTsTNPI	0.643	0.811	0.7	0.718	-	P54071	Isocitrate dehydrogenase [NADP], mitochondrial	Idh2
366	KGRPTStNPIA	0.487	0.495	-0.126	0.285	-	P54071	Isocitrate dehydrogenase [NADP], mitochondrial	Idh2
371	STNPIAsIFAW	0.126	-0.101	-0.916	-0.297	-	P54071	Isocitrate dehydrogenase [NADP], mitochondrial	Idh2
376	ASIFAWtRGLE	0.309	-0.104	-0.829	-0.208	-	P54071	Isocitrate dehydrogenase [NADP], mitochondrial	Idh2
397	LIRFAQtLEKV	0.633	0.463	0.066	0.387	-	P54071	Isocitrate dehydrogenase [NADP], mitochondrial	Idh2
405	EKVCVQtVESG	0.195	-0.009	-0.824	-0.213	-	P54071	Isocitrate dehydrogenase [NADP], mitochondrial	Idh2
408	CVQTVEsGAMT	0.094	-0.239	-1.305	-0.484	-	P54071	Isocitrate dehydrogenase [NADP], mitochondrial	Idh2
412	VESGAMtKDLA	0.337	0.105	-0.332	0.037	-	P54071	Isocitrate dehydrogenase [NADP], mitochondrial	Idh2
423	GCIHGLsNVKL	0.079	-0.088	-1.471	-0.493	-	P54071	Isocitrate dehydrogenase [NADP], mitochondrial	Idh2
434	NEHFLNtTDFL	0.145	-0.079	-1.264	-0.399	-	P54071	Isocitrate dehydrogenase [NADP], mitochondrial	Idh2
435	EHFLNTtDFLD	0.247	0.044	-0.809	-0.173	-	P54071	Isocitrate dehydrogenase [NADP], mitochondrial	Idh2
440	TTDFLDtIKSN	0.055	-0.322	-1.7	-0.655	-	P54071	Isocitrate dehydrogenase [NADP], mitochondrial	Idh2
443	FLDTIKsNLDR	0.418	0.153	-0.312	0.086	-	P54071	Isocitrate dehydrogenase [NADP], mitochondrial	Idh2
3	#NAME?	0.272	-0.309	-0.765	-0.268	-	P57776	Elongation factor 1-delta	Eef1d
34	QMNGPVtSGSR	0.103	-0.075	-0.963	-0.312	-	P57776	Elongation factor 1-delta	Eef1d
35	MNGPVTsGSRQ	0.062	-0.362	-1.487	-0.596	-	P57776	Elongation factor 1-delta	Eef1d
37	GPVTSGsRQEN	0.285	0.048	-0.842	-0.17	-	P57776	Elongation factor 1-delta	Eef1d
44	RQENGAsVILR	0.128	-0.028	-0.58	-0.16	-	P57776	Elongation factor 1-delta	Eef1d
60	RENIQKsLAGS	0.216	-0.001	-0.783	-0.189	-	P57776	Elongation factor 1-delta	Eef1d
64	QKSLAGsSGPG	0.274	-0.056	-0.703	-0.162	-	P57776	Elongation factor 1-delta	Eef1d
65	KSLAGSsGPGA	0.211	0.072	-0.507	-0.075	-	P57776	Elongation factor 1-delta	Eef1d
70	SSGPGAsSGPG	0.059	-0.313	-1.45	-0.568	-	P57776	Elongation factor 1-delta	Eef1d
71	SGPGASsGPGG	0.259	0.232	-0.429	0.021	-	P57776	Elongation factor 1-delta	Eef1d
78	GPGGDHsELIV	0.193	0.075	-1.106	-0.279	-	P57776	Elongation factor 1-delta	Eef1d
85	ELIVRItSLEV	0.252	0.147	-0.906	-0.169	-	P57776	Elongation factor 1-delta	Eef1d
86	LIVRITsLEVE	0.712	0.992	0.763	0.823	-	P57776	Elongation factor 1-delta	Eef1d
106	DLQQAIsKLEA	0.59	0.147	-0.128	0.203	-	P57776	Elongation factor 1-delta	Eef1d
113	KLEARLsSLEK	0.255	-0.01	-0.773	-0.176	-	P57776	Elongation factor 1-delta	Eef1d
114	LEARLSsLEKS	0.366	0.725	-0.084	0.336	-	P57776	Elongation factor 1-delta	Eef1d
118	LSSLEKsSPTP	0.367	0.251	-0.357	0.087	-	P57776	Elongation factor 1-delta	Eef1d
119	SSLEKSsPTPR	0.024	-0.664	-2.059	-0.9	-	P57776	Elongation factor 1-delta	Eef1d
121	LEKSSPtPRAT	0.162	-0.264	-0.702	-0.268	-	P57776	Elongation factor 1-delta	Eef1d
125	SPTPRAtAPQT	0.574	0.47	-0.071	0.324	-	P57776	Elongation factor 1-delta	Eef1d
129	RATAPQtQHVS	0.149	-0.17	-1.121	-0.381	-	P57776	Elongation factor 1-delta	Eef1d
133	PQTQHVsPMRQ	0.218	-0.364	-0.893	-0.346	-	P57776	Elongation factor 1-delta	Eef1d
142	RQVEPPtKKGA	0.077	-0.283	-0.956	-0.387	-	P57776	Elongation factor 1-delta	Eef1d
147	PTKKGAtPAED	0.265	-0.273	-0.809	-0.272	-	P57776	Elongation factor 1-delta	Eef1d
162	DIDLFGsDEEE	0.186	-0.099	-1.397	-0.437	-	P57776	Elongation factor 1-delta	Eef1d
191	KKAKKPtLVAK	0.523	0.071	0.025	0.206	-	P57776	Elongation factor 1-delta	Eef1d
196	PTLVAKsSILL	0.257	0.093	-0.409	-0.02	-	P57776	Elongation factor 1-delta	Eef1d
197	TLVAKSsILLD	0.085	-0.159	-1.13	-0.402	-	P57776	Elongation factor 1-delta	Eef1d
209	KPWDDEtDMAQ	0.144	-0.014	-1.331	-0.401	-	P57776	Elongation factor 1-delta	Eef1d
216	DMAQLEtCVRS	0.111	-0.06	-1.392	-0.447	-	P57776	Elongation factor 1-delta	Eef1d
220	LETCVRsIQLD	0.181	-0.077	-0.931	-0.276	-	P57776	Elongation factor 1-delta	Eef1d
231	GLVWGAsKLVP	0.193	-0.027	-0.833	-0.222	-	P57776	Elongation factor 1-delta	Eef1d
256	EDDKVGtDLLE	0.091	-0.224	-1.476	-0.536	-	P57776	Elongation factor 1-delta	Eef1d
264	LLEEEItKFEE	0.265	-0.042	-0.633	-0.137	-	P57776	Elongation factor 1-delta	Eef1d
272	FEEHVQsVDIA	0.329	0.019	-0.521	-0.058	-	P57776	Elongation factor 1-delta	Eef1d
17	YQYGPNsGGGN	0.143	-0.115	-0.603	-0.192	-	P57780	Alpha-actinin-4	Actn4
28	GAGGGGsMGDY	0.173	0.035	-1.018	-0.27	-	P57780	Alpha-actinin-4	Actn4
56	EKQQRKtFTAW	0.796	0.457	0.698	0.651	-	P57780	Alpha-actinin-4	Actn4
58	QQRKTFtAWCN	0.517	0.468	-0.138	0.282	-	P57780	Alpha-actinin-4	Actn4
63	FTAWCNsHLRK	0.477	-0.064	-0.598	-0.062	-	P57780	Alpha-actinin-4	Actn4
70	HLRKAGtQIEN	0.66	0.411	-0.021	0.35	-	P57780	Alpha-actinin-4	Actn4
93	LLLEVIsGERL	0.164	-0.078	-0.875	-0.263	-	P57780	Alpha-actinin-4	Actn4
122	ALDFIAsKGVK	0.451	0.079	-0.291	0.08	-	P57780	Alpha-actinin-4	Actn4
129	KGVKLVsIGAE	0.367	-0.032	-0.404	-0.023	-	P57780	Alpha-actinin-4	Actn4
143	DGNAKMtLGMI	0.519	0.11	-0.177	0.151	-	P57780	Alpha-actinin-4	Actn4
149	TLGMIWtIILR	0.153	-0.093	-0.552	-0.164	-	P57780	Alpha-actinin-4	Actn4
160	FAIQDIsVEET	0.214	-0.04	-0.733	-0.186	-	P57780	Alpha-actinin-4	Actn4
164	DISVEEtSAKE	0.068	-0.284	-1.801	-0.672	-	P57780	Alpha-actinin-4	Actn4
165	ISVEETsAKEG	0.143	-0.127	-1.108	-0.364	-	P57780	Alpha-actinin-4	Actn4
178	LWCQRKtAPYK	0.811	0.68	0.573	0.688	-	P57780	Alpha-actinin-4	Actn4
192	VQNFHIsWKDG	0.296	0.099	-0.506	-0.037	-	P57780	Alpha-actinin-4	Actn4
223	RKDDPVtNLNN	0.323	-0.025	-1.016	-0.239	-	P57780	Alpha-actinin-4	Actn4
250	AEDIVNtARPD	0.228	-0.123	-1.159	-0.351	-	P57780	Alpha-actinin-4	Actn4
260	DEKAIMtYVSS	0.142	-0.056	-0.979	-0.298	-	P57780	Alpha-actinin-4	Actn4
263	AIMTYVsSFYH	0.209	-0.138	-1.089	-0.339	-	P57780	Alpha-actinin-4	Actn4
264	IMTYVSsFYHA	0.165	0.031	-0.494	-0.1	-	P57780	Alpha-actinin-4	Actn4
270	SFYHAFsGAQK	0.133	-0.161	-0.782	-0.27	-	P57780	Alpha-actinin-4	Actn4
277	GAQKAEtAANR	0.452	0.133	-0.752	-0.056	-	P57780	Alpha-actinin-4	Actn4
304	DYERLAsDLLE	0.692	0.836	-0.032	0.499	-	P57780	Alpha-actinin-4	Actn4
313	LEWIRRtIPWL	0.445	0.711	-0.036	0.373	-	P57780	Alpha-actinin-4	Actn4
325	DRVPQKtIQEM	0.256	0.146	-0.559	-0.052	-	P57780	Alpha-actinin-4	Actn4
360	LEINFNtLQTK	0.319	0.014	-0.544	-0.07	-	P57780	Alpha-actinin-4	Actn4
363	NFNTLQtKLRL	0.114	-0.148	-1.185	-0.406	-	P57780	Alpha-actinin-4	Actn4
368	QTKLRLsNRPA	0.211	-0.116	-0.871	-0.259	-	P57780	Alpha-actinin-4	Actn4
376	RPAFMPsEGRM	0.326	-0.092	-0.596	-0.121	-	P57780	Alpha-actinin-4	Actn4
382	SEGRMVsDINN	0.562	0.783	-0.157	0.396	-	P57780	Alpha-actinin-4	Actn4
424	KFRQKAsIHEA	0.491	0.169	-0.149	0.171	-	P57780	Alpha-actinin-4	Actn4
430	SIHEAWtDGKE	0.171	-0.025	-1.173	-0.343	-	P57780	Alpha-actinin-4	Actn4
444	KQRDYEtATLS	0.325	0.151	-0.861	-0.128	-	P57780	Alpha-actinin-4	Actn4
446	RDYETAtLSDI	0.218	0.104	-0.542	-0.073	-	P57780	Alpha-actinin-4	Actn4
448	YETATLsDIKA	0.083	-0.111	-1.124	-0.384	-	P57780	Alpha-actinin-4	Actn4
462	KHEAFEsDLAA	0.154	-0.148	-1.392	-0.462	-	P57780	Alpha-actinin-4	Actn4
489	ELDYYDsHNVN	0.338	0.072	-0.513	-0.034	-	P57780	Alpha-actinin-4	Actn4
494	DSHNVNtRCQK	0.115	-0.368	-1.404	-0.552	-	P57780	Alpha-actinin-4	Actn4
508	QWDNLGsLTHS	0.085	-0.193	-1.105	-0.404	-	P57780	Alpha-actinin-4	Actn4
510	DNLGSLtHSRR	0.187	-0.084	-0.818	-0.238	-	P57780	Alpha-actinin-4	Actn4
512	LGSLTHsRREA	0.178	-0.083	-0.802	-0.236	-	P57780	Alpha-actinin-4	Actn4
520	REALEKtEKQL	0.325	0.075	-0.48	-0.026	-	P57780	Alpha-actinin-4	Actn4
526	TEKQLEtIDQL	0.167	-0.131	-0.83	-0.265	-	P57780	Alpha-actinin-4	Actn4
547	FNNWMEsAMED	0.303	-0.097	-0.84	-0.211	-	P57780	Alpha-actinin-4	Actn4
560	DMFIVHtIEEI	0.304	0.237	-0.618	-0.025	-	P57780	Alpha-actinin-4	Actn4
569	EIEGLIsAHDQ	0.239	0.031	-0.792	-0.174	-	P57780	Alpha-actinin-4	Actn4
576	AHDQFKsTLPD	0.165	-0.149	-1.106	-0.364	-	P57780	Alpha-actinin-4	Actn4
577	HDQFKStLPDA	0.57	0.527	0.284	0.46	-	P57780	Alpha-actinin-4	Actn4
601	AQRIAEsNHIK	0.407	0.126	-0.667	-0.045	-	P57780	Alpha-actinin-4	Actn4
607	SNHIKLsGSNP	0.014	-0.452	-2.28	-0.906	-	P57780	Alpha-actinin-4	Actn4
609	HIKLSGsNPYT	0.621	0.649	0.161	0.477	-	P57780	Alpha-actinin-4	Actn4
613	SGSNPYtTVTP	0.043	-0.27	-1.179	-0.469	-	P57780	Alpha-actinin-4	Actn4
614	GSNPYTtVTPQ	0.179	-0.216	-1.057	-0.365	-	P57780	Alpha-actinin-4	Actn4
616	NPYTTVtPQII	0.157	-0.284	-0.947	-0.358	-	P57780	Alpha-actinin-4	Actn4
622	TPQIINsKWEK	0.334	0.029	-0.605	-0.081	-	P57780	Alpha-actinin-4	Actn4
643	ALLEEQsKQQS	0.19	-0.072	-0.817	-0.233	-	P57780	Alpha-actinin-4	Actn4
647	EQSKQQsNEHL	0.085	-0.112	-1.006	-0.344	-	P57780	Alpha-actinin-4	Actn4
657	LRRQFAsQANM	0.453	0.367	-0.501	0.106	-	P57780	Alpha-actinin-4	Actn4
668	VGPWIQtKMEE	0.178	-0.182	-0.647	-0.217	-	P57780	Alpha-actinin-4	Actn4
677	EEIGRIsIEMN	0.143	-0.001	-0.956	-0.272	-	P57780	Alpha-actinin-4	Actn4
683	SIEMNGtLEDQ	0.274	-0.059	-0.635	-0.14	-	P57780	Alpha-actinin-4	Actn4
689	TLEDQLsHLKQ	0.086	-0.132	-1.408	-0.485	-	P57780	Alpha-actinin-4	Actn4
697	LKQYERsIVDY	0.36	0.125	-0.531	-0.016	-	P57780	Alpha-actinin-4	Actn4
704	IVDYKPsLDLL	0.273	0.047	-0.293	0.009	-	P57780	Alpha-actinin-4	Actn4
726	IFDNKHtNYTM	0.165	-0.052	-0.737	-0.208	-	P57780	Alpha-actinin-4	Actn4
729	NKHTNYtMEHI	0.267	0.157	-0.349	0.025	-	P57780	Alpha-actinin-4	Actn4
742	GWEQLLtTIAR	0.173	0.001	-0.621	-0.149	-	P57780	Alpha-actinin-4	Actn4
743	WEQLLTtIART	0.066	-0.311	-1.457	-0.567	-	P57780	Alpha-actinin-4	Actn4
747	LTTIARtINEV	0.245	0.023	-0.826	-0.186	-	P57780	Alpha-actinin-4	Actn4
757	VENQILtRDAK	0.138	-0.176	-0.874	-0.304	-	P57780	Alpha-actinin-4	Actn4
764	RDAKGIsQEQM	0.153	-0.206	-0.966	-0.34	-	P57780	Alpha-actinin-4	Actn4
774	MQEFRAsFNHF	0.52	0.255	0.188	0.321	-	P57780	Alpha-actinin-4	Actn4
797	FKACLIsLGYD	0.714	0.206	0.146	0.355	-	P57780	Alpha-actinin-4	Actn4
817	EFNRIMsVVDP	0.666	0.99	0.637	0.764	-	P57780	Alpha-actinin-4	Actn4
824	VVDPNHsGLVT	0.082	-0.133	-1.089	-0.38	-	P57780	Alpha-actinin-4	Actn4
828	NHSGLVtFQAF	0.252	0.019	-0.635	-0.121	-	P57780	Alpha-actinin-4	Actn4
837	AFIDFMsRETT	0.171	-0.073	-1.07	-0.324	-	P57780	Alpha-actinin-4	Actn4
840	DFMSREtTDTD	0.415	0.086	-0.484	0.006	-	P57780	Alpha-actinin-4	Actn4
841	FMSRETtDTDT	0.706	0.991	0.293	0.663	-	P57780	Alpha-actinin-4	Actn4
843	SRETTDtDTAD	0.281	0.157	-0.832	-0.131	-	P57780	Alpha-actinin-4	Actn4
845	ETTDTDtADQV	0.175	-0.05	-1.218	-0.364	-	P57780	Alpha-actinin-4	Actn4
852	ADQVIAsFKVL	0.163	0.023	-0.715	-0.177	-	P57780	Alpha-actinin-4	Actn4
864	GDKNFItAEEL	0.231	0.011	-0.747	-0.168	-	P57780	Alpha-actinin-4	Actn4
901	GALDYKsFSTA	0.374	0.005	-0.418	-0.013	-	P57780	Alpha-actinin-4	Actn4
903	LDYKSFsTALY	0.311	0.159	-0.336	0.045	-	P57780	Alpha-actinin-4	Actn4
904	DYKSFStALYG	0.168	-0.135	-1.35	-0.439	-	P57780	Alpha-actinin-4	Actn4
910	TALYGEsDL--	0.075	-0.065	-1.386	-0.459	-	P57780	Alpha-actinin-4	Actn4
3	#NAME?	0.16	-0.31	-0.988	-0.379	-	P60766	Cell division control protein 42 homolog	Cdc42
17	DGAVGKtCLLI	0.174	0.024	-0.666	-0.156	-	P60766	Cell division control protein 42 homolog	Cdc42
22	KTCLLIsYTTN	0.167	-0.206	-1.334	-0.458	-	P60766	Cell division control protein 42 homolog	Cdc42
24	CLLISYtTNKF	0.462	0.373	0.227	0.354	-	P60766	Cell division control protein 42 homolog	Cdc42
25	LLISYTtNKFP	0.094	-0.17	-1.176	-0.417	-	P60766	Cell division control protein 42 homolog	Cdc42
30	TTNKFPsEYVP	0.187	-0.082	-1.085	-0.327	-	P60766	Cell division control protein 42 homolog	Cdc42
35	PSEYVPtVFDN	0.354	-0.013	-0.401	-0.02	-	P60766	Cell division control protein 42 homolog	Cdc42
43	FDNYAVtVMIG	0.426	0.079	-0.424	0.027	-	P60766	Cell division control protein 42 homolog	Cdc42
52	IGGEPYtLGLF	0.188	0.029	-0.286	-0.023	-	P60766	Cell division control protein 42 homolog	Cdc42
[truncated: 1,533 more rows]
