# Supplementary material for: Proteomic Landscape and Deduced Functions of the Cardiac 14-3-3 Protein Interactome
Source: Cells. 2022 Nov 4;11(21):3496. doi: 10.3390/cells11213496 (PMC9654263; doi:10.3390/cells11213496)
Supplement: Supplementary file 1 [file cells-11-03496-s001.zip › supplementary_TableS14-IPA.xlsx]

## Sheet: All
Supplementary Table S14. Canonical pathways enriched in IPA.
Ingenuity Canonical Pathways	-log(p-value)	Ratio	Molecules
Sirtuin Signaling Pathway	6.65	0.0274	ACADL,IDH2,NDUFB10,NDUFB6,NDUFB9,VDAC3,XRCC5,XRCC6
HIPPO signaling	5.92	0.0588	PPP1R3A,YWHAB,YWHAE,YWHAH,YWHAQ
Epithelial Adherens Junction Signaling	5.92	0.0382	PRKAG1,RAC1,YWHAB,YWHAE,YWHAH,YWHAQ
Mitochondrial Dysfunction	5.7	0.0351	HSD17B10,NDUFB10,NDUFB6,NDUFB9,OGDH,VDAC3
Protein Kinase A Signaling	5.56	0.0197	PPP1R3A,PRKAG1,PYGM,RYR2,YWHAB,YWHAE,YWHAH,YWHAQ
IGF-1 Signaling	5.49	0.0481	PRKAG1,YWHAB,YWHAE,YWHAH,YWHAQ
Cell Cycle: G2/M DNA Damage Checkpoint Regulation	5.36	0.08	YWHAB,YWHAE,YWHAH,YWHAQ
ERK/MAPK Signaling	5.14	0.028	PPP1R3A,PRKAG1,RAC1,YWHAB,YWHAH,YWHAQ
14-3-3-mediated Signaling	5.06	0.0394	VIM,YWHAB,YWHAE,YWHAH,YWHAQ
p70S6K Signaling	4.98	0.0379	Ighg2a,YWHAB,YWHAE,YWHAH,YWHAQ
MSP-RON Signaling In Cancer Cells Pathway	4.89	0.0362	VIM,YWHAB,YWHAE,YWHAH,YWHAQ
ERK5 Signaling	4.72	0.0556	YWHAB,YWHAE,YWHAH,YWHAQ
Inhibition of ARE-Mediated mRNA Degradation Pathway	4.57	0.0311	PRKAG1,YWHAB,YWHAE,YWHAH,YWHAQ
2-ketoglutarate Dehydrogenase Complex	4.55	0.5	DLST,OGDH
ILK Signaling	4.14	0.0253	ACTN1,ACTN4,Cdc42,RAC1,VIM
NAD Signaling Pathway	3.47	0.0265	ACADL,IDH2,PRKAG1,RYR2
DNA Double-Strand Break Repair by Non-Homologous End Joining	3.37	0.143	XRCC5,XRCC6
Telomere Extension by Telomerase	3.31	0.133	XRCC5,XRCC6
Netrin Signaling	3.27	0.0417	PRKAG1,RAC1,RYR2
Germ Cell-Sertoli Cell Junction Signaling	3.27	0.0234	ACTN1,ACTN4,Cdc42,RAC1
PI3K/AKT Signaling	3.02	0.0201	YWHAB,YWHAE,YWHAH,YWHAQ
Sertoli Cell-Sertoli Cell Junction Signaling	2.97	0.0194	ACTN1,ACTN4,PRKAG1,RAC1
TCA Cycle II (Eukaryotic)	2.94	0.087	DLST,OGDH
Integrin Signaling	2.91	0.0188	ACTN1,ACTN4,Cdc42,RAC1
VEGF Signaling	2.87	0.0303	ACTN1,ACTN4,YWHAE
Glycolysis I	2.8	0.0741	PFKL,PFKP
Glucocorticoid Receptor Signaling	2.78	0.0103	NDUFB10,NDUFB6,NDUFB9,PRKAG1,RAC1,YWHAH
Paxillin Signaling	2.76	0.0278	ACTN1,ACTN4,RAC1
Oxidative Phosphorylation	2.73	0.027	NDUFB10,NDUFB6,NDUFB9
Signaling by Rho Family GTPases	2.55	0.0149	ARHGEF5,Cdc42,RAC1,VIM
Intrinsic Prothrombin Activation Pathway	2.42	0.0476	COL1A2,F13A1
CSDE1 Signaling Pathway	2.17	0.0357	RAC1,VIM
Cardiac β-adrenergic Signaling	2.15	0.0169	PPP1R3A,PRKAG1,RYR2
Tumor Microenvironment Pathway	2.15	0.0168	COL1A2,RAC1,SLC16A1
Semaphorin Signaling in Neurons	2.09	0.0323	Cdc42,RAC1
Production of Nitric Oxide and Reactive Oxygen Species in Macrophages	2.07	0.0157	Cdc42,PPP1R3A,RAC1
Leukocyte Extravasation Signaling	2.06	0.0155	ACTN1,ACTN4,RAC1
Pulmonary Healing Signaling Pathway	2.02	0.0151	IDH2,PRKAG1,RAC1
Remodeling of Epithelial Adherens Junctions	2.01	0.0294	ACTN1,ACTN4
Glioma Invasiveness Signaling	1.95	0.0274	Cdc42,RAC1
Thrombin Signaling	1.95	0.0142	ARHGEF5,Cdc42,RAC1
mTOR Signaling	1.95	0.0142	Cdc42,PRKAG1,RAC1
RHOGDI Signaling	1.93	0.014	ARHGEF5,Cdc42,RAC1
Calcium Signaling	1.92	0.0139	LETM1,PRKAG1,RYR2
Estrogen Receptor Signaling	1.92	0.00985	NDUFB10,NDUFB6,NDUFB9,PRKAG1
Macropinocytosis Signaling	1.92	0.0263	ACTN4,RAC1
Dopamine Receptor Signaling	1.89	0.0253	PPP1R3A,PRKAG1
Neurovascular Coupling Signaling Pathway	1.88	0.0133	PRKAG1,RYR2,SLC16A1
Hepatic Fibrosis Signaling Pathway	1.88	0.00955	Cdc42,COL1A2,PRKAG1,RAC1
AMPK Signaling	1.79	0.0124	PFKL,PFKP,PRKAG1
Regulation of Cellular Mechanics by Calpain Protease	1.79	0.0225	ACTN1,ACTN4
Molecular Mechanisms of Cancer	1.78	0.00895	ARHGEF5,Cdc42,PRKAG1,RAC1
Actin Cytoskeleton Signaling	1.78	0.0122	ACTN1,ACTN4,RAC1
Apelin Adipocyte Signaling Pathway	1.77	0.022	PRKAG1,RAC1
Actin Nucleation by ARP-WASP Complex	1.75	0.0215	Cdc42,RAC1
Wound Healing Signaling Pathway	1.75	0.0119	COL1A2,RAC1,VIM
Cardiac Hypertrophy Signaling	1.71	0.0115	Cdc42,PRKAG1,RAC1
Sumoylation Pathway	1.67	0.0194	Cdc42,RAC1
Colorectal Cancer Metastasis Signaling	1.67	0.0111	Cdc42,PRKAG1,RAC1
Opioid Signaling Pathway	1.64	0.0108	PRKAG1,RAC1,RYR2
α-Adrenergic Signaling	1.63	0.0185	PRKAG1,PYGM
Purine Nucleotides De Novo Biosynthesis II	1.62	0.0909	IMPDH2
CDK5 Signaling	1.59	0.0175	PPP1R3A,PRKAG1
Glycogen Degradation II	1.59	0.0833	PYGM
Regulation of Actin-based Motility by Rho	1.57	0.0172	Cdc42,RAC1
Cholecystokinin/Gastrin-mediated Signaling	1.55	0.0168	Cdc42,RAC1
Nitric Oxide Signaling in the Cardiovascular System	1.55	0.0168	PRKAG1,RYR2
Sphingosine-1-phosphate Signaling	1.54	0.0167	Cdc42,RAC1
Neuroprotective Role of THOP1 in Alzheimer's Disease	1.54	0.0167	PRKAG1,YWHAE
Renin-Angiotensin Signaling	1.53	0.0164	PRKAG1,RAC1
Gαs Signaling	1.52	0.0163	PRKAG1,RYR2
Acyl-CoA Hydrolysis	1.52	0.0714	ACOT2
Glycogen Degradation III	1.52	0.0714	PYGM
Urate Biosynthesis/Inosine 5'-phosphate Degradation	1.52	0.0714	IMPDH2
Endocannabinoid Developing Neuron Pathway	1.51	0.016	PRKAG1,RAC1
Reelin Signaling in Neurons	1.51	0.0159	ARHGEF5,RAC1
GP6 Signaling Pathway	1.5	0.0157	COL1A2,RAC1
Synaptic Long Term Potentiation	1.49	0.0155	PPP1R3A,PRKAG1
Extrinsic Prothrombin Activation Pathway	1.46	0.0625	F13A1
White Adipose Tissue Browning Pathway	1.44	0.0147	PRKAG1,SLC16A1
Insulin Receptor Signaling	1.42	0.0143	PPP1R3A,PRKAG1
Isoleucine Degradation I	1.41	0.0556	HSD17B10
PI3K Signaling in B Lymphocytes	1.41	0.014	Ighg2a,RAC1
Endocannabinoid Cancer Inhibition Pathway	1.39	0.0138	PRKAG1,VIM
Breast Cancer Regulation by Stathmin1	1.39	0.00676	ARHGEF5,PPP1R3A,PRKAG1,RAC1
Purine Nucleotides Degradation II (Aerobic)	1.39	0.0526	IMPDH2
Dilated Cardiomyopathy Signaling Pathway	1.38	0.0135	PRKAG1,RYR2
PTEN Signaling	1.37	0.0133	RAC1,YWHAH
Semaphorin Neuronal Repulsive Signaling Pathway	1.36	0.0132	PRKAG1,RAC1
Glutaryl-CoA Degradation	1.35	0.0476	HSD17B10
Apelin Cardiac Fibroblast Signaling Pathway	1.31	0.0435	PRKAG1
HOTAIR Regulatory Pathway	1.3	0.0123	COL1A2,VIM
HMGB1 Signaling	1.28	0.012	Cdc42,RAC1
CXCR4 Signaling	1.27	0.0118	Cdc42,RAC1
Gαq Signaling	1.27	0.0118	Cdc42,RAC1
Glioblastoma Multiforme Signaling	1.27	0.0117	Cdc42,RAC1
Apelin Liver Signaling Pathway	1.26	0.0385	COL1A2
Tight Junction Signaling	1.24	0.0112	PRKAG1,RAC1
D-myo-inositol (1,4,5,6)-Tetrakisphosphate Biosynthesis	1.23	0.0112	ATP1A2,PPP1R3A
D-myo-inositol (3,4,5,6)-tetrakisphosphate Biosynthesis	1.23	0.0112	ATP1A2,PPP1R3A
Tryptophan Degradation III (Eukaryotic)	1.22	0.0357	HSD17B10
Dopamine-DARPP32 Feedback in cAMP Signaling	1.22	0.011	PPP1R3A,PRKAG1
Phospholipase C Signaling	1.22	0.00591	ARHGEF5,Cdc42,Ighg2a,RAC1
Role of p14/p19ARF in Tumor Suppression	1.21	0.0345	RAC1
Sonic Hedgehog Signaling	1.21	0.0345	PRKAG1
GNRH Signaling	1.19	0.0105	PRKAG1,RAC1
3-phosphoinositide Degradation	1.18	0.0105	ATP1A2,PPP1R3A
Regulation Of The Epithelial Mesenchymal Transition By Growth Factors Pathway	1.18	0.0104	RAC1,VIM
Xenobiotic Metabolism PXR Signaling Pathway	1.17	0.0104	PPP1R3A,PRKAG1
PPARα/RXRα Activation	1.17	0.0103	ACADL,PRKAG1
D-myo-inositol-5-phosphate Metabolism	1.17	0.0103	ATP1A2,PPP1R3A
Natural Killer Cell Signaling	1.15	0.0101	COL1A2,RAC1
RAR Activation	1.13	0.0098	PRKAG1,RAC1
Coagulation System	1.13	0.0286	F13A1
3-phosphoinositide Biosynthesis	1.13	0.00976	ATP1A2,PPP1R3A
Fatty Acid β-oxidation I	1.12	0.0278	HSD17B10
HIF1α Signaling	1.12	0.00962	RAC1,VIM
IL-8 Signaling	1.11	0.00948	Cdc42,RAC1
tRNA Charging	1.09	0.0256	VARS1
B Cell Development	1.04	0.0227	Ighg2a
Superpathway of Inositol Phosphate Compounds	1.03	0.00855	ATP1A2,PPP1R3A
Osteoarthritis Pathway	1.03	0.00855	PRKAG1,RAC1
Estrogen Biosynthesis	1.03	0.0222	HSD17B10
Coronavirus Replication Pathway	1.03	0.0222	DDX1
Apelin Pancreas Signaling Pathway	1.02	0.0217	PRKAG1
PFKFB4 Signaling Pathway	1.02	0.0217	PRKAG1
Ephrin A Signaling	1.01	0.0213	RAC1
nNOS Signaling in Skeletal Muscle Cells	1	0.0208	RYR2
Apelin Muscle Signaling Pathway	1	0.0208	PRKAG1
MYC Mediated Apoptosis Signaling	0.983	0.02	PRKAG1
Amyloid Processing	0.975	0.0196	PRKAG1
Phototransduction Pathway	0.951	0.0185	PRKAG1
Circadian Rhythm Signaling	0.939	0.00752	PRKAG1,RYR2
Primary Immunodeficiency Signaling	0.936	0.0179	Ighg2a
Insulin Secretion Signaling Pathway	0.928	0.00741	PRKAG1,RYR2
Retinoic acid Mediated Apoptosis Signaling	0.907	0.0167	DAP3
PCP (Planar Cell Polarity) Pathway	0.907	0.0167	RAC1
Stearate Biosynthesis I (Animals)	0.889	0.0159	ACOT2
PXR/RXR Activation	0.876	0.0154	PRKAG1
Agrin Interactions at Neuromuscular Junction	0.845	0.0143	RAC1
Melatonin Signaling	0.836	0.0139	PRKAG1
Ephrin B Signaling	0.836	0.0139	RAC1
Synaptogenesis Signaling Pathway	0.821	0.00637	PRKAG1,RAC1
GPCR-Mediated Integration of Enteroendocrine Signaling Exemplified by an L Cell	0.818	0.0133	PRKAG1
Leptin Signaling in Obesity	0.812	0.0132	PRKAG1
GDNF Family Ligand-Receptor Interactions	0.812	0.0132	RAC1
Maturity Onset Diabetes of Young (MODY) Signaling	0.801	0.0128	OGDH
IL-3 Signaling	0.799	0.0127	RAC1
Estrogen-Dependent Breast Cancer Signaling	0.799	0.0127	HSD17B10
Pulmonary Fibrosis Idiopathic Signaling Pathway	0.796	0.00613	COL1A2,VIM
Role of Macrophages, Fibroblasts and Endothelial Cells in Rheumatoid Arthritis	0.796	0.00613	Ighg2a,RAC1
Renal Cell Carcinoma Signaling	0.793	0.0125	RAC1
TR/RXR Activation	0.772	0.0119	PFKP
PEDF Signaling	0.772	0.0119	RAC1
FGF Signaling	0.772	0.0119	RAC1
FcγRIIB Signaling in B Lymphocytes	0.77	0.0118	Ighg2a
LPS-stimulated MAPK Signaling	0.77	0.0118	RAC1
BMP signaling pathway	0.759	0.0115	PRKAG1
Acute Myeloid Leukemia Signaling	0.742	0.011	IDH2
Pyroptosis Signaling Pathway	0.733	0.0108	PRKAG1
Fcγ Receptor-mediated Phagocytosis in Macrophages and Monocytes	0.728	0.0106	RAC1
Melanocyte Development and Pigmentation Signaling	0.721	0.0104	PRKAG1
IL-1 Signaling	0.721	0.0104	PRKAG1
Neuropathic Pain Signaling In Dorsal Horn Neurons	0.701	0.0099	PRKAG1
Virus Entry via Endocytic Pathways	0.688	0.00962	RAC1
Kinetochore Metaphase Signaling Pathway	0.664	0.00901	PPP1R3A
Amyotrophic Lateral Sclerosis Signaling	0.65	0.0087	RAC1
Role of Tissue Factor in Cancer	0.648	0.00862	RAC1
FAK Signaling	0.644	0.00855	RAC1
Fc Epsilon RI Signaling	0.64	0.00847	RAC1
PAK Signaling	0.64	0.00847	RAC1
NGF Signaling	0.64	0.00847	RAC1
GPCR-Mediated Nutrient Sensing in Enteroendocrine Cells	0.64	0.00847	PRKAG1
Glioma Signaling	0.622	0.00806	IDH2
Pancreatic Adenocarcinoma Signaling	0.616	0.00794	RAC1
G Beta Gamma Signaling	0.607	0.00775	PRKAG1
fMLP Signaling in Neutrophils	0.6	0.00763	RAC1
Atherosclerosis Signaling	0.6	0.00763	COL1A2
P2Y Purigenic Receptor Signaling Pathway	0.6	0.00763	PRKAG1
HGF Signaling	0.599	0.00758	RAC1
Ferroptosis Signaling Pathway	0.599	0.00758	PRKAG1
CCR3 Signaling in Eosinophils	0.59	0.00741	RAC1
STAT3 Pathway	0.59	0.00741	RAC1
RAC Signaling	0.582	0.00725	RAC1
Gαi Signaling	0.577	0.00714	PRKAG1
Apelin Endothelial Signaling Pathway	0.573	0.00709	PRKAG1
Cellular Effects of Sildenafil (Viagra)	0.553	0.00671	PRKAG1
Corticotropin Releasing Hormone Signaling	0.553	0.00671	PRKAG1
Endocannabinoid Neuronal Synapse Pathway	0.553	0.00671	PRKAG1
Type II Diabetes Mellitus Signaling	0.544	0.00654	PRKAG1
Relaxin Signaling	0.539	0.00645	PRKAG1
Necroptosis Signaling Pathway	0.535	0.00637	VDAC3
Ovarian Cancer Signaling	0.532	0.00633	PRKAG1
eNOS Signaling	0.53	0.00629	PRKAG1
Phagosome Maturation	0.53	0.00629	RAC1
Axonal Guidance Signaling	0.513	0.00394	PRKAG1,RAC1
Androgen Signaling	0.507	0.00592	PRKAG1
Erythropoietin Signaling Pathway	0.491	0.00565	RAC1
Cardiac Hypertrophy Signaling (Enhanced)	0.476	0.00369	PRKAG1,RYR2
Hepatic Cholestasis	0.463	0.00524	PRKAG1
Clathrin-mediated Endocytosis Signaling	0.461	0.00518	RAC1
Hepatic Fibrosis / Hepatic Stellate Cell Activation	0.458	0.00515	COL1A2
Synaptic Long Term Depression	0.457	0.00513	RYR2
Gap Junction Signaling	0.451	0.00505	PRKAG1
Adrenomedullin signaling pathway	0.45	0.00503	PRKAG1
Ephrin Receptor Signaling	0.446	0.00498	RAC1
Gustation Pathway	0.442	0.00493	PRKAG1
TEC Kinase Signaling	0.439	0.00345	Cdc42,RAC1
Dendritic Cell Maturation	0.429	0.00339	COL1A2,Ighg2a
Autophagy	0.426	0.00469	PRKAG1
Role of NFAT in Cardiac Hypertrophy	0.412	0.0045	PRKAG1
B Cell Receptor Signaling	0.395	0.00318	Ighg2a,RAC1
Systemic Lupus Erythematosus In T Cell Signaling Pathway	0.386	0.00313	Cdc42,RAC1
Sperm Motility	0.367	0.00392	PRKAG1
Phagosome Formation	0.347	0.00289	Ighg2a,RAC1
Protein Ubiquitination Pathway	0.342	0.00364	SUGT1
G-Protein Coupled Receptor Signaling	0.34	0.00285	PRKAG1,RAC1
Oxytocin Signaling Pathway	0.337	0.00358	PRKAG1
Neuroinflammation Signaling Pathway	0.3	0.00317	RAC1
Hematopoiesis from Pluripotent Stem Cells	0.205	0.00226	Ighg2a
Autoimmune Thyroid Disease Signaling	0.198	0.0022	Ighg2a
Role of NFAT in Regulation of the Immune Response	0	0.0017	Ighg2a
CD28 Signaling in T Helper Cells	0	0.00193	RAC1
ICOS-ICOSL Signaling in T Helper Cells	0	0.00197	RAC1
CREB Signaling in Neurons	0	0.00166	PRKAG1
Allograft Rejection Signaling	0	0.00207	Ighg2a
Communication between Innate and Adaptive Immune Cells	0	0.00108	Ighg2a
Systemic Lupus Erythematosus Signaling	0	0.00161	Ighg2a
Altered T Cell and B Cell Signaling in Rheumatoid Arthritis	0	0.00203	Ighg2a
Regulation of IL-2 Expression in Activated and Anergic T Lymphocytes	0	0.00217	RAC1
PKCθ Signaling in T Lymphocytes	0	0.00179	RAC1
SAPK/JNK Signaling	0	0.00199	RAC1
T Cell Receptor Signaling	0	0.00163	RAC1
Systemic Lupus Erythematosus In B Cell Signaling Pathway	0	0.00138	RAC1

## Sheet: Metabolic
Ingenuity Canonical Pathways	-log(p-value)	Ratio	Molecules
2-ketoglutarate Dehydrogenase Complex	4.55	0.5	DLST,OGDH
TCA Cycle II (Eukaryotic)	2.94	0.087	DLST,OGDH
Glycolysis I	2.8	0.0741	PFKL,PFKP
Oxidative Phosphorylation	2.73	0.027	NDUFB10,NDUFB6,NDUFB9
Purine Nucleotides De Novo Biosynthesis II	1.62	0.0909	IMPDH2
Glycogen Degradation II	1.59	0.0833	PYGM
Acyl-CoA Hydrolysis	1.52	0.0714	ACOT2
Glycogen Degradation III	1.52	0.0714	PYGM
Urate Biosynthesis/Inosine 5'-phosphate Degradation	1.52	0.0714	IMPDH2
Isoleucine Degradation I	1.41	0.0556	HSD17B10
Purine Nucleotides Degradation II (Aerobic)	1.39	0.0526	IMPDH2
Glutaryl-CoA Degradation	1.35	0.0476	HSD17B10
D-myo-inositol (1,4,5,6)-Tetrakisphosphate Biosynthesis	1.23	0.0112	ATP1A2,PPP1R3A
D-myo-inositol (3,4,5,6)-tetrakisphosphate Biosynthesis	1.23	0.0112	ATP1A2,PPP1R3A
Tryptophan Degradation III (Eukaryotic)	1.22	0.0357	HSD17B10
3-phosphoinositide Degradation	1.18	0.0105	ATP1A2,PPP1R3A
D-myo-inositol-5-phosphate Metabolism	1.17	0.0103	ATP1A2,PPP1R3A
3-phosphoinositide Biosynthesis	1.13	0.00976	ATP1A2,PPP1R3A
Fatty Acid β-oxidation I	1.12	0.0278	HSD17B10
tRNA Charging	1.09	0.0256	VARS1
Superpathway of Inositol Phosphate Compounds	1.03	0.00855	ATP1A2,PPP1R3A
Estrogen Biosynthesis	1.03	0.0222	HSD17B10
Stearate Biosynthesis I (Animals)	0.889	0.0159	ACOT2

## Sheet: Cardiovascular
Ingenuity Canonical Pathways	-log(p-value)	Ratio	Molecules
Intrinsic Prothrombin Activation Pathway	2.42	0.0476	COL1A2,F13A1
Cardiac β-adrenergic Signaling	2.15	0.0169	PPP1R3A,PRKAG1,RYR2
Thrombin Signaling	1.95	0.0142	ARHGEF5,Cdc42,RAC1
Cardiac Hypertrophy Signaling	1.71	0.0115	Cdc42,PRKAG1,RAC1
Nitric Oxide Signaling in the Cardiovascular System	1.55	0.0168	PRKAG1,RYR2
Renin-Angiotensin Signaling	1.53	0.0164	PRKAG1,RAC1
Extrinsic Prothrombin Activation Pathway	1.46	0.0625	F13A1
Dilated Cardiomyopathy Signaling Pathway	1.38	0.0135	PRKAG1,RYR2
Apelin Cardiac Fibroblast Signaling Pathway	1.31	0.0435	PRKAG1
HIF1α Signaling	1.12	0.00962	RAC1,VIM
nNOS Signaling in Skeletal Muscle Cells	1	0.0208	RYR2
Atherosclerosis Signaling	0.6	0.00763	COL1A2
P2Y Purigenic Receptor Signaling Pathway	0.6	0.00763	PRKAG1
Apelin Endothelial Signaling Pathway	0.573	0.00709	PRKAG1
Cellular Effects of Sildenafil (Viagra)	0.553	0.00671	PRKAG1
eNOS Signaling	0.53	0.00629	PRKAG1
Cardiac Hypertrophy Signaling (Enhanced)	0.476	0.00369	PRKAG1,RYR2
Adrenomedullin signaling pathway	0.45	0.00503	PRKAG1
Role of NFAT in Cardiac Hypertrophy	0.412	0.0045	PRKAG1

## Sheet: Molecules
Symbol	Entrez Gene Name	UniProt/Swiss-Prot Accession	Expr Log Ratio	Expr False Discovery Rate (q-value)	Location	Type(s)	Biomarker Application(s)	Drug(s)	Entrez Gene ID for Human	Entrez Gene ID for Mouse	Entrez Gene ID for Rat	Entrez
ACADL	acyl-CoA dehydrogenase long chain	P51174	0.473	5.4e-05	Cytoplasm	enzyme	unspecified application		33	11363	25287	11363
ACOT2	acyl-CoA thioesterase 2	Q9QYR9	1.453	0.00105	Cytoplasm	enzyme			10965	171210	192272	171210
ACTN1	actinin alpha 1	Q7TPR4	2.6	0	Cytoplasm	transcription regulator			87	109711	81634	109711
ACTN4	actinin alpha 4	P57780	1.772	0	Cytoplasm	transcription regulator			81	60595	63836	60595
ARHGEF5	Rho guanine nucleotide exchange factor 5	E9Q7D5	1.681	0.00175	Cytoplasm	other			7984	54324	140898	54324
ATP1A2	ATPase Na+/K+ transporting subunit alpha 2	Q6PIE5	1.112	0.000301	Plasma Membrane	transporter		digoxin,ethacrynic acid,perphenazine	477	98660	24212	98660
Cdc42	cell division cycle 42	P60766	1.741	0.000671	Plasma Membrane	enzyme	unspecified application			12540	64465	12540
COL1A2	collagen type I alpha 2 chain	Q01149	1.016	0.0777	Extracellular Space	other		collagenase	1278	12843	84352	12843
DAP3	death associated protein 3	Q9ER88	1.079	0.0708	Cytoplasm	other			7818	65111	295238	65111
DDX1	DEAD-box helicase 1	Q91VR5	1.216	0.0365	Nucleus	enzyme			1653	104721	84474	104721
DLST	dihydrolipoamide S-succinyltransferase	Q9D2G2	0.711	2e-06	Cytoplasm	enzyme			1743	78920	299201	78920
EEF1D	eukaryotic translation elongation factor 1 delta	P57776	1.235	0.0208	Cytoplasm	translation regulator			1936	66656	300033	66656
F13A1	coagulation factor XIII A chain	Q8BH61	1.661	0.00149	Extracellular Space	enzyme			2162	74145	60327	74145
FAM210A	family with sequence similarity 210 member A	Q8BGY7	1.209	0.0101	Cytoplasm	other			125228	108654	307343	108654
HSD17B10	hydroxysteroid 17-beta dehydrogenase 10	O08756	1.242	1e-06	Cytoplasm	enzyme			3028	15108	63864	15108
IDH2	isocitrate dehydrogenase (NADP(+)) 2	P54071	0.404	0	Cytoplasm	enzyme	unspecified application	enasidenib,HMPL-306,TQB3455	3418	269951	361596	269951
Ighg2a	immunoglobulin heavy constant gamma 2A	P01865	1.929	0.000228	Extracellular Space	other				380793		380793
IMPDH2	inosine monophosphate dehydrogenase 2	P24547	1.516	0.00622	Cytoplasm	enzyme		6-mercaptopurine/prednisone/thioguanine,cytarabine/daunorubicin/thioguanine,cytarabine/thioguanine,IFNA2B/ribavirin,imatinib/thioguanine,interferon alfacon-1/ribavirin,methylprednisolone/mycophenolate mofetil,mycophenolate mofetil,mycophenolate mofetil/prednisone,mycophenolic acid,pegintron/ribavirin,ribavirin,thioguanine,VX-944	3615	23918|100042069	301005	23918
KIF5B	kinesin family member 5B	Q61768	1.805	0.000431	Cytoplasm	other			3799	16573	117550	16573
LETM1	leucine zipper and EF-hand containing transmembrane protein 1	Q9Z2I0	0.985	0.0876	Cytoplasm	transporter			3954	56384	305457	56384
MAP4	microtubule associated protein 4	P27546	1.499	2.7e-05	Cytoplasm	other	efficacy		4134	17758	367171	17758
MFN1	mitofusin 1	Q811U4	1.443	0.00872	Cytoplasm	enzyme			55669	67414	192647	67414
MRPL37	mitochondrial ribosomal protein L37	Q921S7	1.144	0.0307	Cytoplasm	enzyme			51253	56280	56281	56280
NDUFB10	NADH:ubiquinone oxidoreductase subunit B10	Q9DCS9	2.096	1e-06	Cytoplasm	enzyme			4716	68342	681418	68342
NDUFB6	NADH:ubiquinone oxidoreductase subunit B6	Q3UIU2	1.495	0.000335	Cytoplasm	enzyme			4712	230075	297990	230075
NDUFB9	NADH:ubiquinone oxidoreductase subunit B9	Q9CQJ8	1.234	0.0304	Cytoplasm	enzyme			4715	66218	299954	66218
NUDT8	nudix hydrolase 8	Q9CR24	1.147	0.0593	Cytoplasm	other			254552	66387	361692	66387
OGDH	oxoglutarate dehydrogenase	Q60597	0.63	0	Cytoplasm	enzyme			4967	18293	360975	18293
PFKL	phosphofructokinase, liver type	P12382	2.249	1e-06	Cytoplasm	kinase			5211	18641	25741	18641
PFKP	phosphofructokinase, platelet	Q9WUA3	1.17	0.0248	Cytoplasm	kinase			5214	56421	60416	56421
PPP1R3A	protein phosphatase 1 regulatory subunit 3A	Q99MR9	3.465	0	Cytoplasm	phosphatase	unspecified application		5506	140491	500036	140491
PRKAG1	protein kinase AMP-activated non-catalytic subunit gamma 1	O54950	1.415	0.0107	Nucleus	kinase			5571	19082	25520	19082
PYGM	glycogen phosphorylase, muscle associated	Q9WUB3	0.773	0	Cytoplasm	enzyme			5837	19309	24701	19309
RAB1B	RAB1B, member RAS oncogene family	Q9D1G1	1.858	0.00061	Cytoplasm	other			81876	76308	100126191|102555167	76308
RAC1	Rac family small GTPase 1	P63001	1.356	0.0128	Plasma Membrane	enzyme			5879	19353	363875	19353
RTN2	reticulon 2	O70622	0.995	0.0966	Cytoplasm	other	unspecified application		6253	20167	308410	20167
RYR2	ryanodine receptor 2	E9Q401	1.045	0.0812	Plasma Membrane	ion channel			6262	20191	689560	20191
SLC16A1	solute carrier family 16 member 1	P53986	1.373	0.00224	Plasma Membrane	transporter	diagnosis	AZD-3965	6566	20501	25027	20501
SMYD1	SET and MYND domain containing 1	P97443	2.474	0	Nucleus	transcription regulator			150572	12180	297333	12180
SUGT1	SGT1 homolog, MIS12 kinetochore complex assembly cochaperone	Q9CX34	4.611	0	Nucleus	other			10910	67955	290408	67955
TCP1	t-complex 1	P11983	1.141	0.0467	Cytoplasm	other			6950	21454	24818	21454
TUFM	Tu translation elongation factor, mitochondrial	Q8BFR5	0.581	0	Cytoplasm	translation regulator			7284	233870	293481	233870
VARS1	valyl-tRNA synthetase 1	Q9Z1Q9	1.368	0.0122	Cytoplasm	enzyme			7407	22321	25009	22321
VDAC3	voltage dependent anion channel 3	Q60931	1.518	0.00165	Cytoplasm	ion channel			7419	22335	83532	22335
VIM	vimentin	P20152	2.062	0	Cytoplasm	other	diagnosis,efficacy,prognosis,unspecified application		7431	22352	81818	22352
VWA8	von Willebrand factor A domain containing 8	Q8CC88	2.528	0	Cytoplasm	enzyme			23078	219189		219189
XRCC5	X-ray repair cross complementing 5	P27641	1.782	0.00108	Nucleus	enzyme	unspecified application		7520	22596	363247	22596
XRCC6	X-ray repair cross complementing 6	P23475	1.352	0.0131	Nucleus	enzyme	unspecified application		2547	14375	25019	14375
YWHAB	tyrosine 3-monooxygenase/tryptophan 5-monooxygenase activation protein beta	Q9CQV8	4.087	0	Cytoplasm	other			7529	54401	56011	54401
YWHAE	tyrosine 3-monooxygenase/tryptophan 5-monooxygenase activation protein epsilon	P62259	1.811	0	Cytoplasm	other	diagnosis		7531	22627	29753	22627
YWHAH	tyrosine 3-monooxygenase/tryptophan 5-monooxygenase activation protein eta	P68510	2.305	4e-06	Cytoplasm	transcription regulator	unspecified application		7533	22629	25576	22629
YWHAQ	tyrosine 3-monooxygenase/tryptophan 5-monooxygenase activation protein theta	P68254	5.006	0	Cytoplasm	other			10971	22630|102634437	25577	22630
