# Supplementary material for: Proteomic Landscape and Deduced Functions of the Cardiac 14-3-3 Protein Interactome
Source: Cells. 2022 Nov 4;11(21):3496. doi: 10.3390/cells11213496 (PMC9654263; doi:10.3390/cells11213496)
Supplement: Supplementary file 1 [file cells-11-03496-s001.zip › supplementary_TableS15-related_to_cellular_metabolism.xlsx]

## Sheet: summary
Supplementary Table S15. GO terms, KEGG pathways and IPA canonical pathways related to cellular metabolism when mapping to the cellular metabolism network.
Related to insulin signaling
IPA	Insulin Receptor Signaling
BP	regulation of insulin secretion
	insulin secretion
	positive regulation of insulin secretion involved in cellular response to glucose stimulus
KEGG	Insulin resistance
Related to glycolysis
IPA	Glycolysis I
Related to apoptosis
IPA	MYC Mediated Apoptosis Signaling
	Retinoic acid Mediated Apoptosis Signaling
Related to fatty acid b-oxidation
IPA	Fatty Acid β-oxidation I
BP	fatty acid catabolic process
	energy derivation by oxidation of organic compounds
Related to TCA Cycle
IPA	TCA Cycle II (Eukaryotic)
	Mitochondrial Dysfunction
BP	tricarboxylic acid cycle
KEGG	Citrate cycle (TCA cycle)
Related to autophagy
IPA	Autophagy
Related to amino acid metabolism
KEGG	Biosynthesis of amino acids
Related to mTOR
IPA	mTOR Signaling
Related to ERK
IPA	ERK/MAPK Signaling
Related to AKT
IPA	PI3K/AKT Signaling
KEGG	PI3K-Akt signaling pathway
Related to protein synthesis
MF	translation elongation factor activity
