# Supplementary material for: Proteomic Landscape and Deduced Functions of the Cardiac 14-3-3 Protein Interactome
Source: Cells. 2022 Nov 4;11(21):3496. doi: 10.3390/cells11213496 (PMC9654263; doi:10.3390/cells11213496)
Supplement: Supplementary file 1 [file cells-11-03496-s001.zip › supplementary_TableS16-software.xlsx]

## Sheet: Sheet1
Supplementary Table S16. Summary of analysis methods and software.
Analysis	Tool or databese	Website	Reference
Processing transcriptomic data	Partek® Flow ® software, version 9.0 Copyright ©; 2020 Partek Inc., St. Louis, MO, USA	https://partekflow.cit.nih.gov/flow/homepage.xhtml
Processing transcriptomic data	NIH HPC Biowulf cluster	http://hpc.nih.gov
Expression of 14-3-3 RNA isoforms	ENCODE project (BioProject: PRJNA66167)	https://www.ncbi.nlm.nih.gov/bioproject/66167	PMID: 25409824
Mapping to 14-3-3 interactome database	ANIA	https://ania-1433.lifesci.dundee.ac.uk/prediction/webserver/index.py/getting_started; OR: https://github.com/JiahuaQu/Structural-Landscape-and-Deduced-Functions-of-The-Cardiac-14-3-3-Protein-Interactome/tree/main/Database/ANIA	PMID: 22870394, 24501395
Protein-protein interaction	STRING (version: 11.0)	http://string-db.org/	PMID: 30476243
Protein domain analysis in STRING	INTERPRO, PFAM and SMART	https://www.ebi.ac.uk/interpro/; https://pfam.xfam.org/; http://smart.embl-heidelberg.de/
Functional analysis for clusters or subgroups in STRING	GO and KEGG	http://geneontology.org/; https://www.genome.jp/kegg/
Functional analysis (GO and KEGG) for whole interactome	clusterProfiler (version: 4.0.5)	https://yulab-smu.top/biomedical-knowledge-mining-book	PMID: 34557778
GO term redundance reduction	REVIGO (October 2021)	http://revigo.irb.hr/	PMID: 21789182
Protein localization analysis	IMPI (version: Q2 2018), MitoCarta (version: 2.0) and AmiGO (version: 2.5.12)	http://www.mrc-mbu.cam.ac.uk/impi; https://www.broadinstitute.org/scientific-community/science/programs/metabolic-disease-program/publications/mitocarta/mitocarta-in-0; http://amigo.geneontology.org/amigo/search/bioentity?q=mitochondrion	PMID: 26432830, 26450961, 18614015, 30395331, 10802651, 19033274
Ingenuity Pathway Analysis	IPA (released in October 2021 by QIAGEN)
Circos plot	circos and Perl	http://circos.ca/; https://www.perl.org/	PMID: 19541911
Data processing and plotting	R (version: 4.1.1) and Rstudio (version: 1.4.1717)
Data processing and plotting	Microsoft Excel (version: 2021)
Data processing and plotting	Adobe Illustrator (version: CC 2021)
Protein-protein interaction	BioPlex (version: 3.0)	https://bioplex.hms.harvard.edu/	PMID: 33961781
Predicting 14-3-3 binding sites	14-3-3 Pred	http://www.compbio.dundee.ac.uk/1433pred	PMID: 25735772
